# Supplementary material for: Prevalence and burden of chronic kidney disease among the general population and high-risk groups in Africa: a systematic review
Source: PubMed Central journal article supplement — BMJ Open. 2018 Jan 10;8(1):e015069. doi: 10.1136/bmjopen-2016-015069 (PMC5780690; doi:10.1136/bmjopen-2016-015069), 2018-01-10
Supplement: bmjopen-2016-015069.draft_revisions.pdf [file bmjopen-2016-015069.draft_revisions.pdf]

# BMJ Open

BMJ Open is committed to open peer review. As part of this commitment we make the peer review history of every article we publish publicly available.

When an article is published we post the peer reviewers' comments and the authors' responses online. We also post the versions of the paper that were used during peer review. These are the versions that the peer review comments apply to.

The versions of the paper that follow are the versions that were submitted during the peer review process. They are not the versions of record or the final published versions. They should not be cited or distributed as the published version of this manuscript.

BMJ Open is an open access journal and the full, final, typeset and author-corrected version of record of the manuscript is available on our site with no access controls, subscription charges or pay-per-view fees (<http://bmjopen.bmj.com>).

If you have any questions on BMJ Open's open peer review process please email [editorial.bmjopen@bmj.com](mailto:editorial.bmjopen@bmj.com)

# BMJ Open

## CHRONIC KIDNEY DISEASE IN AFRICA: A SYSTEMATIC REVIEW

|                                 |                                                                                                                                                                                                                                                                                                                                                                                                                                                                                                                                                                                                            |
|---------------------------------|------------------------------------------------------------------------------------------------------------------------------------------------------------------------------------------------------------------------------------------------------------------------------------------------------------------------------------------------------------------------------------------------------------------------------------------------------------------------------------------------------------------------------------------------------------------------------------------------------------|
| Journal:                        | <i>BMJ Open</i>                                                                                                                                                                                                                                                                                                                                                                                                                                                                                                                                                                                            |
| Manuscript ID                   | bmjopen-2016-015069                                                                                                                                                                                                                                                                                                                                                                                                                                                                                                                                                                                        |
| Article Type:                   | Research                                                                                                                                                                                                                                                                                                                                                                                                                                                                                                                                                                                                   |
| Date Submitted by the Author:   | 15-Nov-2016                                                                                                                                                                                                                                                                                                                                                                                                                                                                                                                                                                                                |
| Complete List of Authors:       | Abd ElHafeez, Samar; Alexandria University High Institute of Public Health, Epidemiology<br>Bologna, Davide; CNR-IFC, Clinical Epidemiology of Renal Diseases and Hypertension, Reggio Cal Unit<br>D'Arrigo, Graziella; CNR-IFC, Clinical Epidemiology of Renal Diseases and Hypertension, Reggio Cal Unit<br>Dounousi, Evangelia; University of Ioannina School of Medicine, Nephrology<br>Tripepi, Giovanni; CNR-IFC, Clinical Epidemiology of Renal Diseases and Hypertension, Reggio Cal Unit<br>Zoccali, Carmine; CNR-IFC, Clinical Epidemiology of Renal Diseases and Hypertension, Reggio Cal Unit; |
| <b>Primary Subject Heading</b>: | Epidemiology                                                                                                                                                                                                                                                                                                                                                                                                                                                                                                                                                                                               |
| Secondary Subject Heading:      | Renal medicine, Research methods                                                                                                                                                                                                                                                                                                                                                                                                                                                                                                                                                                           |
| Keywords:                       | Chronic renal failure < NEPHROLOGY, Africa, EPIDEMIOLOGY                                                                                                                                                                                                                                                                                                                                                                                                                                                                                                                                                   |
|                                 |                                                                                                                                                                                                                                                                                                                                                                                                                                                                                                                                                                                                            |

SCHOLARONE™  
Manuscripts

only

1  
2  
3 1 **TITLE PAGE**4 2  
5 3 **CHRONIC KIDNEY DISEASE IN AFRICA: A SYSTEMATIC REVIEW**6 4  
7 5 *Samar Abd ElHafeez<sup>1</sup> Dr.PH, Davide Bolignano<sup>2</sup> MD; Graziella D'Arrigo<sup>2</sup>, Ph.D; Evangelia Dounousi<sup>3</sup>,Ph.D;*  
8 6 *Giovanni Tripepi<sup>2</sup>, Ph.D; Carmine Zoccali<sup>2</sup>, FASN, FNKF, FERA*9 7  
10 8 <sup>1</sup>*High Institute of Public Health - Alexandria University, Epidemiology, Alexandria, EGYPT*11 9 <sup>2</sup>*CNR/IFC, Clin. Epid. and Physiopath. of Renal Dis. and Hypert., Reggio Calabria, ITALY*12 10 <sup>3</sup>*Department of Nephrology, School of Health Sciences - University of Ioannina, Ioannina, GREECE*13 11  
14 12 Correspondence:

15 13 Prof. Carmine Zoccali

16 14 CNR Clinical Epidemiology and Physiopathology of Renal Diseases and Hypertension of Reggio  
17 15 Calabria, c/o Nefrologia e CNR Ospedali Riuniti 89124 Reggio Cal, ITALY

18 16 Email: carmine.zoccali@tin.it

19 17 FAX 0039.0965.26879

20 18 **Word count:**21 19 **Abstract: 284**22 20 **Body of the manuscript: 3919**23 21 **Keywords:** CKD, Africa, systematic review  
24 22  
25 23  
26 24  
27 25  
28 26  
29 27  
30 28  
31 29  
32 30  
33 31  
34 32  
35 33  
36 34  
37 35  
38 36  
39 37  
40 38  
41 39  
42 40  
43 41  
44 42  
45 43  
46 44  
47 45  
48 46  
49 47  
50 48  
51 49  
52 50  
53 51  
54 52  
55 53  
56 54  
57 55  
58 56  
59 57  
60 58

## ABSTRACT

While increasing attention is being paid to the rising prevalence of non-communicable diseases in Africa, there remains little focus on the risk posed by chronic kidney disease (CKD). This systematic review assesses the CKD burden among the general population and high-risk groups on the entire African continent.

We searched the MEDLINE and PUBMED databases for articles published between January 1<sup>st</sup>, 1995 and September 25<sup>th</sup>, 2014 by sensitive search strategies focusing on CKD surveys at the community level and in high risk groups. In total, 6163 references were evaluated, of which 6050 articles were excluded because they did not meet the inclusion criteria. Thus, 113 studies were included in the final analysis.

In the community-level studies, based on available medium and high quality studies, the pooled prevalence of CKD in Africa was 9.4% (95% CI: 9.1-9.7%). Central region had the highest prevalence (16.4%), followed by West/Central-West (16.1%), Southern (12.1%), South-East (11.0%), North-East (7.7%), and North (4%) Africa. The prevalence in sub-Saharan Africa (based on medium and high quality studies) was 15.3%, i.e. Close to that in a previous meta-analysis by Stanifer et al. (13.2%). The pooled prevalence of CKD in the high risk groups was 4.4% (95% CI: 4.1-4.5%) in HIV (based on available medium and high quality studies), 37.7% (95%CI: 35.9-39.6%) in diabetes [based on all available studies which are of low quality except one of medium quality] and 35.0% (95 % CI: 33.5%-36.6%) in patients with hypertension (based on all available studies which are of low quality except two of medium quality)

In Africa, the burden of CKD attributable to high risk conditions such as hypertension and diabetes is of the same order or greater than that seen in economically developed Western countries.

### Strengths and limitations of the study

- There is increasing attention on chronic non-communicable diseases in Africa but information on chronic kidney disease (CKD) is sparse and mainly limited to sub-Saharan Africa where the average prevalence was estimated to be of the same magnitude or even higher than in most Western countries.
- In this systematic review we assessed the CKD burden among the general population and high-risk groups on the entire African continent.
- The quality of the included articles was assessed based on standard criteria dealing with clinical trials, diagnostic studies, and observational studies. The articles were assessed based on the subject sampling and precision, sampling technique, response rate, and exclusion rate.
- No meta-analysis was conducted in this review due to the huge discrepancy in the definition used to identify CKD, the methods of creatinine measurement, urine protein assessment, and in the quality of the reporting.

## 1 INTRODUCTION

2 Chronic kidney disease (CKD) is an emerging global public health problem[1]. The disease is a  
3 component of a new epidemic of chronic conditions that replaced malnutrition and infection as  
4 leading causes of mortality during the twentieth century[2]. Age-standardized death rates due to  
5 CKD have increased during the last 23 years. CKD has shifted from the 36<sup>th</sup> cause of death in 1990  
6 to the 19<sup>th</sup> cause in 2013[3]. The worldwide increase in CKD and kidney failure—necessitating renal  
7 replacement therapy (RRT) —and the high rate of cardiovascular mortality and morbidity  
8 attributable to CKD are poised to reach epidemic proportions over the next decade. CKD  
9 complications represent a considerable burden on global health care resources and only a small  
10 number of countries have sufficiently robust economies to meet the challenge posed by this disease.  
11 Socioeconomic differences in health exist and individuals of lower socioeconomic status (SES)  
12 have a higher risk for mortality and morbidity compared with those of higher SES[4]. A change in  
13 the global approach to CKD from the treatment of ESRD to intensive primary and secondary  
14 prevention is therefore considered an absolute public health priority[5].

15 Africa is the second largest continent in the world, with a population of over 1 billion; 961.5  
16 million people live in sub-Saharan Africa and 195 million in Northern Africa[6] . Africa now faces  
17 the dual challenge of infectious illnesses and chronic diseases. Africa's chronic disease burden is  
18 secondary to various factors, including increased life expectancy, changing lifestyle practices,  
19 poverty, urbanization and globalization[7]. The burden of CKD on the entire continent remains  
20 underestimated due to a lack of epidemiological information on the problem of kidney disease in  
21 different African countries. There exists only a single systematic review conducted in sub-Saharan  
22 Africa which concluded that CKD is a prevalent and potentially escalating disease across sub-  
23 Saharan Africa, with both communicable and non-communicable risk factors[8]. Strategies aimed at  
24 managing CKD epidemics in Africa critically depend on a reliable assessment of the burden of the  
25 problem and the establishment of affordable early detection programs. Previous studies reported the

1 prevalence of CKD among the general population or the specific prevalence of this condition in  
2 diseases that are recognized as drivers of renal damage (e.g., diabetes mellitus). These estimates  
3 have varied across studies due to differences in the methods of Glomerular Filtration Rate (GFR)  
4 measurement, background risk (general population vs. high risk groups), or demographic  
5 characteristics (e.g., age, gender)[9].

6 With this background in mind, this review aimed to increase the systematic information on the  
7 burden of CKD in the general population and high risk groups of the entire African continent and  
8 provide an estimate of the prevalence of CKD in different regions of Africa.

## 9 **MATERIALS AND METHODS**

### 10 **Data source and search strategy**

11 We followed the Preferred Reporting Items for Systematic Reviews and Meta-Analyses (PRISMA)  
12 Guidelines[10]. A systematic literature search was performed in the PubMed and OVID-MEDLINE  
13 databases by two authors (DB and SA) to identify articles reporting epidemiology data on CKD in  
14 the adult population in any geographic area of the African continent. This employed focused, highly  
15 sensitive search strategies (S1 Table). The search covered the time frame from January 1<sup>st</sup>, 1995 to  
16 September 25<sup>th</sup>, 2014. Papers without language and study design restrictions were located and  
17 screened. References from relevant studies were screened for supplementary articles.

### 18 **Study selection and data extraction**

19 Titles and abstracts were screened independently by two authors (SA and GD), who discarded  
20 studies that were not relevant to the topic. Case reports, reviews, editorials, letters, and studies  
21 focusing on African-Americans not living on the African continent, conducted entirely among  
22 children, or dealing with acute kidney injury or kidney transplantation were excluded. Two authors  
23 (SA, ED) independently assessed the retrieved abstracts and the full texts of these studies to  
24 determine eligibility according to the inclusion criteria. Disagreements were resolved through  
25 discussion and consensus, or through consultation with a third reviewer (DB), who solved these

1  
2  
3 1 differences based on study judgments. Furthermore, screening of reference lists of all of the  
4  
5 2 retrieved studies was conducted to check for relevant articles, and a supplementary scan of the  
6  
7 3 reference lists of the systematic reviews was performed to identify any additional studies. Data were  
8  
9 4 extracted from full-text articles and registered using a specifically designed form. These data  
10  
11 5 included study design, geographical area, sample size, the definition of CKD used, prevalence of  
12  
13 6 CKD, age, gender, GFR measurement, type of creatinine assay, proteinuria, the method of outcome  
14  
15 7 assessment and associated comorbidities such as diabetes mellitus and hypertension. Data extraction  
16  
17 8 was performed by one reviewer (SA) and independently verified by another reviewer (DB).  
18  
19

## 20 21 **Data extraction and analysis**

22  
23  
24 10 Studies were categorized according to the reference population as follows: 1) studies dealing  
25  
26 11 with the general population and 2) studies focusing on particular diseases such as diabetes,  
27  
28 12 hypertension, lupus and HIV or settings, e.g., hospital- based surveys and occupational studies.  
29

30  
31 13 Information on the assessment of kidney function was collected, including: the equation  
32  
33 14 adopted for GFR estimation ((Cockcroft-Gault(CG), Modification of Diet in Renal Disease  
34  
35 15 (MDRD), Chronic Kidney Disease-Epidemiology Collaboration (CKD-EPI)), the type of creatinine  
36  
37 16 assay (Jaffe, standardized or unknown), and the type of proteinuria or albuminuria assay used  
38  
39 17 (semi-quantitative assessment by urinary strips or quantitative in urine samples or 24 h collection).  
40  
41 18 When the study included two or three GFR equations, we defined the CKD prevalence based on the  
42  
43 19 CKD-EPI equation whenever this information was provided. Otherwise, we considered the MDRD  
44  
45 20 equation and lastly the CG equation. In the case of ethnicity correction[11]; we included the  
46  
47 21 equation which corrected for ethnicity. Information on the definition of CKD used in each study  
48  
49 22 was also included ((either the internationally accepted definition as Kidney Disease Improving  
50  
51 23 Global Outcomes (KDIGO), or other ways of defining CKD)).  
52  
53

## 54 55 **Quality assessment**

56  
57  
58 25 Two independent authors (SA and DB) appraised each article and assessed its quality based  
59  
60

1 on standard criteria described into details in previous methodology reviews dealing with clinical  
2 trials[12], diagnostic studies[13], and observational studies[14]. The articles were assessed based  
3 on the subject sampling and precision, sampling technique, response rate, and exclusion rate

## 4 **Statistical analyses**

5 The principal demographic and clinical data for each study were summarized as the mean  
6 and standard deviation or as absolute number and percentage, as appropriate. The age range in each  
7 study was also recorded. The pooled prevalence rate of CKD was expressed as a point estimate and  
8 95% CI. No meta-analysis was conducted in this study. Data were appropriately presented for  
9 different populations (general population and CKD patients). The patients' data were stratified by  
10 the type of underlying condition, i.e., hypertension, diabetes mellitus, HIV, or systemic lupus  
11 erythematosus. All calculations were conducted using SPSS for Windows, version 21, Chicago,  
12 Illinois, USA.

## 13 **RESULTS**

### 14 **Search results**

15 The flow diagram of the selection process is depicted in (Fig. 1). In total, 6145 potentially relevant  
16 references were initially retrieved. Eighteen additional citations were found through a personal  
17 search. By screening titles and abstracts, a total 5890 citations were excluded because of search  
18 overlap, dealing with the wrong population (African American, AKI, cancer or post-transplant  
19 patients), or not providing actual data on CKD. Review articles, case reports, editorials, or letters  
20 were also excluded. Amongst the 273 studies selected for full text examination, 160 were excluded  
21 because they dealt with a population different from that specifically targeted in this systematic  
22 review, such as paediatric populations (81 studies), transplant patients (n=30), or others (n=46)  
23 (e.g., Africans living in non-African countries), or because only narrative data were provided  
24 (n=12). A total 113 articles were therefore reviewed in detail and included in the analysis. The main  
25 characteristics of these studies are summarized in Table 1.



## 1 **Study characteristics**

2           Amongst the 113 studies reviewed, 17 were general population studies (Table 2). Ninety-six  
3 studies focused on selected groups, of which 27 included HIV patients (Table 3), 14 studied  
4 diabetic patients (Table 4), seven included hypertensive subjects (Table 5) and eight were  
5 conducted in other populations (Table 6), including one study in lupus patients[15], two in specific  
6 occupational settings (silica exposure[16] and exposure to the nephrotoxic hair-dye,  
7 paraphenylenediamine[17]) and five studies in family practice[18-20] or hospital-based[21]  
8 surveys. Forty studies conducted among CKD patients (S2 Table)[22-61].

9 The studies that were included covered all regions of Africa. The highest number of the studies  
10 came from the Western macro-area (n=38), followed by the Eastern macro-areas (n=19). Eighteen  
11 studies were retrieved from the Northern Africa, seventeen from the Southern Africa, and ten  
12 studies from the Central macro-area. The lowest number of studies was from the Central Western  
13 macro-area (n=8). Three studies were conducted in both the Eastern and Southern regions.

## 14 **Assessment of kidney function impairment**

15           Urinary markers for kidney disease were assessed in fifty-four (74%) among seventy-three  
16 studies conducted in the general population, high risk groups, occupational or hospital-based  
17 studies. Proteinuria was assessed by a semi-quantitative method (urinary strips) in twenty  
18 studies[18,20, 62-79]. Sixteen studies used dipstick with confirmation by quantitative methods, nine  
19 of which used dipsticks to identify proteinuria/albuminuria with confirmation by 24-hour  
20 proteinuria[19,80-87] whereas seven studies used dipstick with confirmation by the protein-to-  
21 creatinine ratio or albumin-to-creatinine ratio[88-94]. Quantitative methods for the assessment of  
22 proteinuria/albuminuria (24-hour proteinuria or albuminuria, PCR, immunoassay, or ACR) were  
23 applied in seventeen studies[15, 21, 95-109]. In one study, the method of proteinuria assessment  
24 was not mentioned[110].

25           Serum creatinine was measured in sixty studies (82%). The Jaffe assay was used in eighteen

1 studies[65, 68, 70, 72, 73, 76, 80, 85, 88, 94, 104, 106, 111-116] whereas the IDMS-calibrated  
2 method was used in six studies [11, 20, 96, 110, 117, 118]. In five studies, both the Jaffe assay and  
3 the calibrated serum creatinine were used [19, 81, 82, 89, 119]. In the remaining thirty-one studies  
4 provided no information on the method of creatinine measurement[15, 18, 21, 67, 69, 71, 74, 75,  
5 77-79, 83, 84, 87, 92, 95, 97-102, 105, 107, 120-126]. With respect to the formula used for  
6 estimating GFR, the MDRD equation was used in nineteen studies[18-20, 68, 80, 88, 89, 94-96,  
7 101, 102, 106, 110, 115, 117, 118, 120, 125] and the CG equation was used in thirteen[15, 65, 71,  
8 76-78, 83, 85, 98, 104, 112, 114, 123]. The other thirteen studies used both the CG and the MDRD  
9 equations[67, 69, 70, 73-75, 81, 82, 84, 113, 116, 122, 124], whereas six studies estimated GFR by  
10 the CG, MDRD, and the CKD-EPI methods[11, 72, 92, 111, 119, 121].

## 11 **Definition of CKD**

12 Thirteen studies defined the presence of CKD as an eGFR below 60 ml/min/1.73 m<sup>2</sup>[11, 70,  
13 94, 96, 98, 115, 117, 118, 120, 122-125], with chronicity confirmed by repeated testing in four  
14 other studies[111-114]. Moreover, fifteen studies reported CKD prevalence based on eGFR below  
15 60 ml/min/1.73 m<sup>2</sup> and/or the presence of proteinuria or albuminuria[18, 20, 65, 67, 72-74, 76, 82,  
16 83, 88, 89, 92, 101, 110]. Proteinuria/albuminuria was used alone to identify CKD in eleven  
17 studies[62-64, 66, 77, 90, 91, 93, 103, 108, 109]. KDIGO staging[127] of CKD was used in eleven  
18 studies[19, 68, 69, 75, 80, 81, 95, 102, 104, 106, 119]. The serum creatinine level (either doubling,  
19 or an increase above a certain threshold) was considered to be a marker of the presence of CKD in  
20 four studies[79, 87, 100, 126]. In fifteen studies, the definition of CKD was either not mentioned or  
21 was defined in various ways, including personal history, Creatinine Clearance (CrCl)  $\leq$ 50 ml/min,  
22 clinical manifestations, the presence of albuminuria, elevated serum creatinine, and the average of  
23 two measurements of eGFR  $<$  90 ml/min/1.73 m<sup>2</sup>[15, 21, 71, 78, 84-86, 97, 99, 105, 107, 116, 121,  
24 128, 129].

## Paper quality

Paper quality was high in eight studies [19, 64, 80, 81, 88, 89, 95, 119]. Twenty-one studies were of medium quality[11, 20, 62, 63, 66-68, 71, 72, 93, 94, 96, 108, 110, 112-114, 118, 120, 121, 124]. The rest of the studies were of low quality.

## Prevalence of CKD

Based on the prevalence of eGFR  $<60$  ml/min/1.73m<sup>2</sup> and/or the presence albuminuria/proteinuria (the current definition of CKD by KDIGO)[127] reported in the 14 medium-high quality studies in **Table 2** the pooled prevalence of CKD in the general population in Africa was 9.4% (95% CI: 9.1-9.7%). The highest prevalence was reported in the Central region (16.4%), followed by West/Central-West (16.1%), Southern (12.1%), South-East (11.0%), North-East (7.7%), and North (4%) Africa (Fig. 2). The pooled prevalence in Sub-Saharan Africa was 15.3% (95% CI: 14.6- 16.00 %).

Among HIV patients (**Table 3**), the pooled prevalence of CKD (estimated as above on the basis of the KDIGO definition in the nine medium quality studies in the same table) was 4.4% (95% CI: 4.1-4.5%). Based on the treatment status, the prevalence of renal dysfunction was 4.7% (95 % CI: 4.5- 4.9%) among HIV patients not receiving treatment while the prevalence was 6.0% (95 % CI: 5.5-6.5%) among HIV patients on anti-retroviral therapy .The Central macro-area recorded the highest prevalence of CKD among HIV patients (39%), followed by the West/ Central-West (38%), South-East (5.0%) , and South (3.0%) macro-areas.

Among diabetic patients (**Table 4**, 14 all studies are of low quality except for one with medium quality), the pooled prevalence of CKD by the KDIGO definition was 37.7% (95%CI: 35.9-39.6%). The highest prevalence was in the South-East (55.1%), followed by the South (47.5%), West/Central-West (34.1%), Central (21.2%), and North (18.6%) Africa.

The pooled prevalence of CKD among hypertensive patients (**TABLE 5**, 7 studies; all of low quality except for two with medium quality) by KDIGO criteria was 35.0% (95 % CI: 33.5%-

1 36.6%). The highest prevalence was reported in the West/Central-West (39.4%) followed by South  
2 (25.4%) Africa. No data were found for other African macro-areas.

3 Among other patient populations (studies reported in Table 6), almost three quarters of the  
4 lupus patients had CKD (prevalence=72.0%) based on low quality study[15]. Hospital-based  
5 surveys revealed that ( the calculation was based on **the total prevalence** reported from all studies  
6 including three of high-medium quality and 2 of low quality in the same table )more than one third  
7 of patients attending either primary care centres or tertiary hospitals had CKD (pooled prevalence=  
8 35.5%, 95% CI: 33.7-37.2%). The study (low quality) conducted among hairdressers exposed to  
9 paraphenylenediamine[87] reported that 26.4% of these subjects had renal impairment. Of note,  
10 100% of silica-exposed workers experienced proteinuria ( reported from low quality study)[109].

11 The prevalence of CKD was variable based on definition used to diagnose CKD. Based on  
12 medium-high quality studies; CKD had a 4 % prevalence (95% CI: 3.8- 4.2%) in population studies  
13 defining this disease as an eGFR below 60 ml/min/1.73 m<sup>2</sup>[11, 94, 96, 118, 120, 124]. When CKD  
14 was diagnosed based on eGFR below 60 ml/min/1.73 m<sup>2</sup> and/or the presence of proteinuria or  
15 albuminuria[20, 67, 72, 88, 89, 110]; the prevalence was 4.1 % (95 %CI: 3.8-4.5). The prevalence  
16 of CKD was 23.0 % (95% CI: 22.0- 24.0%) in studies where the disease was defined on the basis of  
17 proteinuria[62-64, 66, 93, 108]. When KDIGO definition (i.e. by combining the eGFR and  
18 proteinuria/albuminuria) was used[19, 68, 80, 81, 95, 119], the prevalence of CKD was 16.1%  
19 (95% CI: 15.1-17.2%)

## 20 **Causes of CKD**

21 Forty studies were conducted specifically to clarify the underlying cause of CKD [22-61]. (S2  
22 Table) The diagnosis was biopsy-proven in sixteen studies[24, 30, 32, 34-36, 39, 45, 46, 49, 51, 54,  
23 58-61]. Diabetic nephropathy was the leading cause of CKD (19.1%), followed by hypertensive  
24 nephrosclerosis (13.2%), chronic glomerulonephritis (12.9%), tubulo-interstitial/obstructive (3.4%),  
25 lupus nephritis (2.1%), and polycystic kidney disease (2%). In nine studies, the diagnosis remained  
26 undetermined (2.5%). (Fig. 3)

## DISCUSSION

This systematic review focuses on the burden of CKD on the entire African continent. We assessed 113 papers published between January 1<sup>st</sup>, 1995 until September 25<sup>th</sup>, 2014, reporting the epidemiology of CKD in the general population and in specific chronic conditions in Africa. The differences in the methods adopted to define the prevalence of CKD (creatinine measured by various techniques, estimated GFR, dipstick and albuminuria/proteinuria measurements, either timed or every 24 h), in addition to differences in sample size, demographics, and clinical characteristics, is an objective and significant limitation in this systematic review for making accurate estimates of the prevalence of CKD in African countries. Furthermore, only five studies[69,111-114] assessed the KDIGO chronicity criterion, which is a fundamental element of the current definition of CKD by this organization. Thus, estimates in this review should be seen as a pragmatic attempt to evaluate the dimension of CKD as a public health issue on the African continent.

CKD is now considered to be an important component of the epidemic of non-communicable diseases in economically developed and developing countries alike. In a seminal meta-analysis published in 2014 Stanifer et al.,[8] for the first time drew attention to the public health relevance of CKD in the sub-Saharan Africa, a vast area comprising 85% (947.4 million ) of the whole African population[8]. In the present systematic review, the lowest prevalence of CKD (4%) was reported in the Northern Africa macro-area; including Egypt, Libya, Tunisia, Algeria, Morocco, the Western Sahara, and Mauritania, and the highest (16.4%) was observed in Central Africa, which includes Angola, Cameroon, Central African Republic, Chad, Democratic Republic of the Congo, Republic of the Congo, Equatorial Guinea, Gabon, Sao Tome and Principe. The average prevalence of in the entire African continent was 9.4%. In sub-Saharan Africa in Stanifer's meta-analysis, the prevalence of CKD was 13.2%[8], which is close to that reported in the same area in our review (15.3%). Among the general population of economically developed countries,

1 CKD has a 13.6% prevalence in the USA[130]. In Europe, the reported prevalence is lower and  
2 more homogenous, being 8.9% in the Netherlands, 6.8% in Italy, 5.2% in Portugal, 4.7% in Spain,  
3 and 3.3% in Norway[131]. CKD prevalence in some Asian countries was higher than the estimates  
4 in the USA and in Europe, being 17.5% in Thailand[132], 15% in India[133], 13% in Japan[134],  
5 11.9% in Taiwan[135], and 9.9% in China[136]. Overall, the estimated prevalence of CKD at the  
6 general population level in African countries appears to be comparable and possibly even higher  
7 than that reported in other continents. This may be at least in part due to the low quality data for the  
8 prevalence of CKD in Africa related to poor sampling techniques, unreliable kidney function  
9 measurements, and the different definitions used.

10 In our review, the prevalence of CKD in surveys based on hospitals or primary care centres  
11 (35.5%) is close to that in Swiss primary care centres (36%)[137].

12 Poverty-related factors such as infectious diseases secondary to poor sanitation, inadequate  
13 supply of safe water, environmental pollutants and high concentrations of disease transmitting  
14 vectors continue to play an important role in the development of CKD in low-income countries.  
15 Although rates of diabetic nephropathy are rising, chronic glomerulonephritis and interstitial  
16 nephritis are among the principal causes of CKD in many countries[138].

17 In Africa, infectious diseases such as HIV, bilharziasis, malaria, hepatitis B and C represent  
18 an almost unique cluster of risk factors responsible for CKD[139]. HIV/AIDS is pandemic in  
19 Africa, with a prevalence ranging from 0.5% in Senegal[140] to 27.4% in Swaziland[141]. The  
20 global success in bringing effective antiretroviral treatment (HAART) to HIV-infected patients in  
21 Africa has determined the emergence of chronic medical illnesses such as HIV-related CKD[142].  
22 Up to 50% of kidney diseases in HIV-infected persons result from a wide array of non-HIV-  
23 associated nephropathy (HIVAN) pathologies, ranging from glomerulonephritis to diabetic  
24 nephropathy [143]. We found that 4.2% of HIV patients complained of renal dysfunction. This  
25 figure is lower than that reported in economically developed countries such as France, USA, China,  
26 Spain, and Brazil[144-148]. Variation in the proportion of HIV patients affected by CKD depends

1  
2  
3  
4  
5  
6  
7  
8  
9  
10  
11  
12  
13  
14  
15  
16  
17  
18  
19  
20  
21  
22  
23  
24  
25  
26  
27  
28  
29  
30  
31  
32  
33  
34  
35  
36  
37  
38  
39  
40  
41  
42  
43  
44  
45  
46  
47  
48  
49  
50  
51  
52  
53  
54  
55  
56  
57  
58  
59  
60

1 on the heterogeneity in the definition used to determine renal dysfunction, the proportion of the  
2 study population on HAART, diverse ethnicities, and the associated comorbidities. Furthermore,  
3 differences in HIV clades or strains in African patients[149] and genetic factor [150] may influence  
4 the replication capacities within the isolated renal reservoir and thus lead to a diversity in clinical  
5 presentations[70].

6 Regarding systemic autoimmune diseases such as lupus, a study conducted among lupus  
7 patients from Senegal showed that almost three quarters (71.0%) the patients with this disease had  
8 evidence of renal involvement[15]. This isolated figure is higher than that reported in other  
9 countries[151-153].

10 Even though there are no sufficient data to precisely reconstruct historical trends, the profile  
11 of CKD causes has changed during the last decades. Interstitial nephritis and glomerulonephritis  
12 were the main causes of CKD in North Africa[154] and CKD was principally caused by chronic  
13 glomerulonephritis and hypertension in East and Tropical Africa[155 156]. Today, the spectrum of  
14 causes of CKD in Africa is dominated by diabetes mellitus and hypertension. We found that the  
15 prevalence of diabetic and hypertensive nephropathies as a cause of CKD (19.1% and 13.2%,  
16 respectively) exceeded that caused by chronic glomerulonephritis (12.9%).

17 Our review has both strengths and limitations. The major strengths include a thorough  
18 systematic search of electronic databases and the inclusion of all comprehensive studies with a  
19 transparent assessment of CKD prevalence by two independent reviewers. The fact that our  
20 literature search was limited to PubMed and Medline OVID but did not include the African  
21 Index Medicus, like it was done by Stanifer in the meta-analysis of CKD in sub-Saharan Africa  
22 [8], is a limitation of our study. Because there was a huge discrepancy in the definitions used to  
23 identify CKD, the methods of creatinine measurement, urine protein assessment, and in the quality  
24 of the reporting, we decided to adopt an inclusive strategy. Our primary interest was to identify all  
25 studies conducted among different population groups in Africa providing information on CKD and  
26 to reconstruct a tentative scenario of the epidemiological dimension concerning disease in the entire

1  
2  
3 1 African continent. Methodological limitations notwithstanding this review compiled estimates  
4  
5 2 suggesting that the CKD burden in Africa is at least as concerning as that in economically-  
6  
7 3 developed countries. The lack of a consistent definition of CKD makes it difficult to compare the  
8  
9 4 burden of CKD across studies in various countries. Moreover, the failure to demonstrate chronicity  
10  
11 5 when defining CKD is a common limitation of studies investigating CKD prevalence in Africa. It  
12  
13 6 was reported that a single test in time has an extremely poor positive predictive value for  
14  
15 7 confirmation of CKD compared to repeated testing 3 months later. Failure to repeat testing may  
16  
17 8 lead to a significant overestimation of CKD prevalence and underestimation of the burden of CVD  
18  
19 9 in CKD[157]. The CKD-EPI formula was applied in only six studies[11, 72, 92, 111, 119, 121].  
20  
21  
22  
23 10 Similar limitations were found for proteinuria and albuminuria.

24  
25 11 In conclusion, CKD in Africa appears to be at least as common as in other continents and as  
26  
27 12 such, it constitutes a true public health priority. Targeted screening of high-risk groups (including  
28  
29 13 those with hypertension, diabetes mellitus, HIV patients and persons with occupational exposures)  
30  
31 14 should likely be instituted as the first step in kidney disease prevention whenever and wherever  
32  
33 15 affordable and feasible. Education to increase awareness of CKD among healthcare workers and  
34  
35 16 patients, and the promotion of healthy life styles, should be engrained in preventive programs. The  
36  
37 17 treatment of hypertension and diabetes mellitus are of obvious relevance. Nurses and other health  
38  
39 18 workers should be trained to manage these conditions at the local level if we are to curb the  
40  
41 19 incidence of CKD and to avert the added burden of CKD complications to diabetes, hypertension,  
42  
43 20 and infectious diseases, the deadly trio of risk factors underlying the CKD epidemic in Africa.  
44  
45  
46  
47  
48  
49  
50  
51  
52  
53  
54  
55  
56  
57  
58  
59  
60



1  
2  
3  
4  
5  
6  
7  
8  
9  
10  
11  
12  
13  
14  
15  
16  
17  
18  
19  
20  
21  
22  
23  
24  
25  
26  
27  
28  
29  
30  
31  
32  
33  
34  
35  
36  
37  
38  
39  
40  
41  
42  
43  
44  
45  
46  
47  
48  
49  
50  
51  
52  
53  
54  
55  
56  
57  
58  
59  
60

1  
2  
3  
4  
5  
6  
7  
8  
9  
10  
11  
12  
13  
14  
15  
16  
17  
18  
19  
20  
21  
22  
23  
24  
25  
26  
27  
28  
29  
30  
31  
32  
33  
34  
35  
36  
37  
38  
39  
40  
41  
42  
43  
44  
45  
46  
47  
48  
49  
50  
51  
52  
53  
54  
55  
56  
57  
58  
59  
60

**AUTHORS' CONTRIBUTIONS:**

SA, DB, and CZ: conceptualized and designed the study.

SA, GD, and ED: participated in revising the articles included in the review and retrieved the necessary information.

DB and GT: supervised the data capture and analysis.

SA, DB, and GT: analysed and interpreted the data.

SA, DB, and CZ: drafted and critically revised the manuscript.

All of the authors read and approved the final manuscript.

For peer review only

**Table 1: Characteristics of the study population included in the analysis**

| Study population         | Number of the studies | Study characteristics                                                                                             |
|--------------------------|-----------------------|-------------------------------------------------------------------------------------------------------------------|
| General population       | 17                    | N=22652, age ranging from 12 to 95 years; 48% males                                                               |
| Diabetic patients        | 14                    | N=2629, age ranging from 14 to 90 years; 44% males                                                                |
| Hypertensive patients    | 7                     | N=3625, age ranging from 19 to 90 years; 44% males                                                                |
| HIV patients             | 27                    | N= 57779, age ranging from 13 to 74 years; 64% males                                                              |
| Occupational group       | 2                     | N= 153, age ranging from 22 to 59 years; one study only enrolled females and the other principally enrolled males |
| Family practice patients | 5                     | N= 2645, age ranging from 20-74 years, 44% males                                                                  |
| Lupus patients           | 1                     | N= 43, age ranging from 6 to 55 years, 7% males                                                                   |
| CKD patients             | 40                    | N =32440, age ranging from 12 to 90 years, 58% males                                                              |

Table 2: Studies on CKD among the general population

| Study ID          | Year, Country, Region     | Location                                                                 | N    | Population Characteristic                                                                                                                                                                               | Definition of CKD                | Method of outcome assessment                                                                            | Type of creatinine assay      | Proteinuria                                   | CKD prevalence                                                                     | Quality assessment |
|-------------------|---------------------------|--------------------------------------------------------------------------|------|---------------------------------------------------------------------------------------------------------------------------------------------------------------------------------------------------------|----------------------------------|---------------------------------------------------------------------------------------------------------|-------------------------------|-----------------------------------------------|------------------------------------------------------------------------------------|--------------------|
| Abdelsatir S[128] | 2013 Sudan North-east     | All village inhabitants                                                  | 389  | Age (years): 41 ± 15<br>Male gender: 16.2%<br>HTN: 39.6%, DM: 17%<br>BMI category: ( kg/m <sup>2</sup> )<br><18: 6.2%,<br>18-24.9: 65.8%,<br>25-29.9: 20.2 %,<br>≥30: 7.8%                              | Not identified, personal history | Personal history                                                                                        | Not mentioned                 | Not measured                                  | <b>Total prevalence (as reported): 6.40%</b>                                       | Low                |
| Fatiu A[62]       | 2011 Nigeria West         | Market population                                                        | 286  | Age (years): 49.5 ± 5.7<br>Male gender: 9.8%<br>HTN: 37.7%<br>BMI (kg/m <sup>2</sup> ): 26.76 ± 5.28<br><20 kg/m <sup>2</sup> : 7.4%<br>20-25 kg/m <sup>2</sup> : 33.4%<br>> 25 kg/m <sup>2</sup> : 59% | Proteinuria ≥ +1                 | Midstream urine sample was tested by urinary strip                                                      | Not measured                  | <b>29.70%</b>                                 | <b>Total prevalence ( based on proteinuria prevalence): 29.7%</b>                  | Medium             |
| Traore M[63]      | 1998 Mali West            | All Household population of the villages                                 | 1098 | Age (years): 30±12<br>Male gender: 52%                                                                                                                                                                  | Proteinuria ≥ +1                 | Microhaematuria and proteinuria by urinary strip                                                        | Not measured                  | 40.80%                                        | <b>Total prevalence ( based on proteinuria prevalence): 40.80%</b>                 | Medium             |
| Matsha T[11]      | 2013 South Africa South   | Bellville town inhabitants                                               | 1202 | Age (years): 52.9 ±14.8<br>Male gender: 24.7%<br>SBP: 125±20<br>DBP: 76 ±13<br>DM: 26.4%<br>BMI: 29.9 ±7.2                                                                                              | eGFR<60 ml/min                   | 4 variables: MDRD, CG, CKD-EPI                                                                          | Standardized creatinine assay | Not measured                                  | <b>Prevalence of stages 3-5: 7.4% (based on CKD-EPI with ethnicity correction)</b> | Medium             |
| Seck SM[80]       | 2014 Senegal West         | Two stage cluster sampling of Urban and rural inhabitants of Saint-Louis | 1037 | Age (years): 48.0 ± 16.9<br>Male gender: 40%<br>HTN: 39.1%<br>DM: 12.7%<br>BMI: 26.3 ± 6.8 kg/m <sup>2</sup>                                                                                            | KDIGO                            | Albuminuria by urinary strips. Positive samples were confirmed by 24-hour albuminuria, eGFR by 186 MDRD | Kinetic Jaffe                 | 5.3% albuminuria >1 g/l                       | <b>Total prevalence: 6.1%</b>                                                      | High               |
| Pruijm M[95]      | 2007 Seychelles Southeast | a random sex-stratified and age-stratified sample inhabitants of         | 1255 | Age (years): range, 25-64<br>Male gender: 46%                                                                                                                                                           | KDIGO                            | Quantitative microalbuminuria by ACR, eGFR using MDRD                                                   | Not mentioned                 | 11.4% microalbuminuria, 0.7% macroalbuminuria | <b>Total prevalence : 15.3%</b><br>Prevalence of stages 3-4 CKD 3.2%.              | High               |

|                 |                           |                                              |      |                                                                                                                                                                                                                                                                 |                                                                                               |                                                                                                            |  |                                                 |                                                                                                                                                                                                                                  |        |
|-----------------|---------------------------|----------------------------------------------|------|-----------------------------------------------------------------------------------------------------------------------------------------------------------------------------------------------------------------------------------------------------------------|-----------------------------------------------------------------------------------------------|------------------------------------------------------------------------------------------------------------|--|-------------------------------------------------|----------------------------------------------------------------------------------------------------------------------------------------------------------------------------------------------------------------------------------|--------|
|                 |                           | Seychelle                                    |      |                                                                                                                                                                                                                                                                 |                                                                                               |                                                                                                            |  |                                                 |                                                                                                                                                                                                                                  |        |
| Sumaili EK[81]  | 2009 Congo Central        | Multistage sampling of residents of Kinshasa | 500  | Age (years): 38.6 ± 14.4<br>Male gender: 41%<br>HTN: 27.6%<br>DM: 11.7%<br>BMI category:<br>25–29.9 kg/m <sup>2</sup> : 20.3%<br>≥30 kg/m <sup>2</sup> : 14.9%                                                                                                  | KDIGO                                                                                         | Proteinuria by urinary strip and 24-hour proteinuria, eGFR by CG and 175MDRD                               |  | 18% proteinuria by dipstick<br>5% (≥300 mg/day) | <b>Total prevalence:</b><br>MDRD 12.4%<br>CG 19%<br><br><b>Prevalence by stage (MDRD)</b><br>Stage 1: 2%<br>Stage 2: 2.4%<br>Stage 3: 7.8%<br>Stage 4: 0.2%                                                                      | High   |
| Matsha T[120]   | 2014 South Africa South   | All residents of Cape-Town                   | 320  | Age (years): mean, 56.4 (55.1–57.6, 95% CI)<br>Male gender: 22%<br>SBP: 124.7 (122.8–126.7, 95% CI)mmHg<br>DBP: 75.5 (74.2–76.7, 95% CI) mmHg<br>BMI: 31.9 (31.2–32.7, 95% CI) kg/m <sup>2</sup><br>Mean eGFR at baseline: 68.6±16.7 ml/min/1.73 m <sup>2</sup> | eGFR < 60 ml/min/ 1.73 m <sup>2</sup>                                                         | eGFR- 186MDRD (4 variables)                                                                                |  | Not measured                                    | <b>Total Prevalence 28.9% by categories</b><br>eGFR>90 ml/min/1.73m <sup>2</sup> :9.4%<br>eGFR60-90 ml/min/1.73m <sup>2</sup> : 58.7%<br>eGFR30-60 ml/min/1.73m <sup>2</sup> : 28.1%<br>eGFR<30 ml/min/1.73m <sup>2</sup> : 0.9% | Medium |
| Sumaili EK[64]  | 2008 Congo Central        | All Residents of Kinshasa                    | 3018 | Age (years): 44.3 ±15.3<br>Male gender: 59%<br>HTN: 18%<br>DM: 4%                                                                                                                                                                                               | Proteinuria ≥ +1                                                                              | Proteinuria by urinary strip                                                                               |  | 17.1%                                           | <b>Total prevalence ( based on proteinuria prevalence): 17.1%</b>                                                                                                                                                                | High   |
| Egbi OG[65]     | 2014 Nigeria Central-West | All Civil servants in Bayelsa                | 179  | Age (years): 45.2 ± 10.3<br>Male gender: 53.1%<br>SBP:128.5± 17.5 mmHg<br>DBP: 81.8 ±13.2 mmHg                                                                                                                                                                  | eGFR <60 ml/min/1.73 m <sup>2</sup> and/or presence of proteinuria of at least +1 on dipstick | Proteinuria by urinary strip, eGFR by CG equation standardized for body surface area (BSA)                 |  | 5.6%                                            | <b>Total prevalence: 7.8%</b><br><br><b>Prevalence by stage</b><br>Stage 1:3.4%<br>Stage 2: 2.2%<br>Stage 3: 2.2%<br>None in stage 4 or 5                                                                                        | Low    |
| Oluymb o R[88]  | 2013 Nigeria Central-West | Multistage sampling of Households of Ilie    | 454  | Age (years): 45.8 ± 19.0<br>Male gender: 43%<br>HTN: 20.4%<br>DM: 0.6%                                                                                                                                                                                          | eGFR <60 ml/min and/or macroalbuminuria (ACR>300 mg/g or dipstick proteinuria)                | Proteinuria by urinary strip, negative cases were estimated for albumin creatinine ratio, eGFR by 186 MDRD |  | Macroalbuminuria in 8.9%                        | <b>Total prevalence: 18.8%</b><br><br><b>Prevalence by stage</b><br>Stage 1: 2.4%<br>Stage 2: 4.1%<br>Stage 3: 11.8%<br>Stage 4: 0.5%                                                                                            | High   |
| Eastwood J[119] | 2010 Ghana West           | Inhabitants of 12 villages                   | 944  | Age (years): 54.7±11.2<br>Male gender: 38%<br>SBP:125.5±26.0 mmHg                                                                                                                                                                                               | KDIGO                                                                                         | 175MDRD, CG, CKD-EPI                                                                                       |  |                                                 | <b>Total Prevalence ( based on CKD-EPI and ethnicity correction) :</b>                                                                                                                                                           | High   |

|                 |                            |                                                                                                   |       |                                                                                                                     |                                                                                                                                                                                   |                                                                     |                        |                                       |                                                                                                                                                   |        |
|-----------------|----------------------------|---------------------------------------------------------------------------------------------------|-------|---------------------------------------------------------------------------------------------------------------------|-----------------------------------------------------------------------------------------------------------------------------------------------------------------------------------|---------------------------------------------------------------------|------------------------|---------------------------------------|---------------------------------------------------------------------------------------------------------------------------------------------------|--------|
|                 |                            |                                                                                                   |       | DBP: 74.4 ± 13.6 mmHg<br>DM: 4%<br>BMI: 21.1 ± 4.2 kg/m <sup>2</sup>                                                |                                                                                                                                                                                   |                                                                     |                        |                                       | 1.7%<br>MDRD: 1.6% (7.2 %<br>without ethnicity<br>correction;<br>CKD-EPI 1.7% (4.7%<br>without ethnicity<br>correction),<br>CG 21.0%.             |        |
| Gouda Z[96]     | 2011<br>Egypt<br>North     | Community based in Al-Buhayrah governorate                                                        | 417   | Age (years): 39.12 ± 14.29<br>Male gender: 43.2%<br>HTN: 25.20%<br>DM: 10.6%<br>BMI: 29.96 ± 6.18 kg/m <sup>2</sup> | eGFR <60 ml/min/1.73 m <sup>2</sup>                                                                                                                                               | Quantitative assessment of urinary ACR, eGFR by 175 MDRD            | IDMS-calibrated        | 10.6%<br>microalbuminuria             | <b>Total prevalence 18%</b>                                                                                                                       | Medium |
| Ayodele OE[66]  | 2011<br>Nigeria<br>West    | People at a major trade center, the public servant secretariat and the state broadcasting station | 586   | Age (years): 42.4±11.2<br>Male gender: 61.4 %<br>HTN: 16.4%<br>DM: 3.8%<br>BMI: 25.9±5.4 kg/m <sup>2</sup>          | proteinuria ≥+1                                                                                                                                                                   | Proteinuria by urinary strip                                        | Not assessed           | 2.50%                                 | <b>Total prevalence ( based on proteinuria ): 2.50%</b>                                                                                           | Medium |
| Abu-Aisha H[67] | 2009<br>Sudan<br>Northeast | Pilot survey of police housing complex                                                            | 273   | Age (years): 34.3±12<br>Male gender: 49.1%<br>HTN: 27%<br>DM: 5.1%                                                  | eGFR <60 ml/min/1.73 m <sup>2</sup> and or proteinuria                                                                                                                            | Proteinuria by urinary strip, 175MDRD, CG                           | Not mentioned          | 5.30%                                 | <b>Total prevalence (MDRD) 7.7% [11% by CG]</b><br><b>Prevalence by stage</b><br>Stage 1 or 2: 4.7%<br>Stage 3: 2.6%<br>Stage 4: 0<br>Stage: 0.4% | Medium |
| Gharbi M[89]    | 2012<br>Morocco<br>North   | Stratified random sampling of population in two towns                                             | 10524 | Age (years): range, 25-70<br>Male gender: (50%),<br>HTN: 16.7%                                                      | eGFR < 60 ml/ min/1.73 m <sup>2</sup> or macroalbuminuria or dipstick abnormalities (proteinuria ≥ ++ 1 or haematuria: ≥ ++1) or diabetes type 1 associated with microalbuminuria | 175 MDRD, microalbuminuria and proteinuria by urinary strip and ACR | Kinetic Jaffe and IDMS | microalbuminuria (30-299 mg/l): 5.26% | <b>Total prevalence 2.90%</b>                                                                                                                     | High   |
| CU O[117]       | 2014<br>Nigeria<br>West    | All attendees to lectures of the Ebreime Foundation for the elderly,                              | 170   | Age (years): 68.1±7.7<br>Male gender: 67.1%                                                                         | eGFR<60ml/min/1.73 m <sup>2</sup>                                                                                                                                                 | 175 MDRD                                                            | IDMS calibrated        |                                       | <b>Total prevalence: 43.50%,</b><br>(all cases were at stage 3)                                                                                   | Low    |

HTN: hypertension, DM: diabetes mellitus, BMI: body mass index, SBP: systolic blood pressure, DBP: diastolic blood pressure, IDMS: Isotope dilution mass spectrometry , MDRD: Modification of Diet in Renal Disease, CG: Cockcroft Gault , CKD-EPI: Chronic Kidney Disease Epidemiology Collaboration

For peer review only

1  
2  
3  
4  
5  
6  
7  
8  
9  
10  
11  
12  
13  
14  
15  
16  
17  
18  
19  
20  
21  
22  
23  
24  
25  
26  
27  
28  
29  
30  
31  
32  
33  
34  
35  
36  
37  
38  
39  
40  
41  
42  
43  
44  
45  
46  
47  
48  
49

Table 3: Studies on CKD among HIV patients

| Author       | Year, Country, Region                  | Location                             | N    | Study group                                 | Population characteristics                                                                                                                                      | Definition of CKD                                                                                                                                       | Method of outcome assessment | Creatinine assay | Proteinuria  | CKD prevalence                                                                                                                                              | Quality assessment |
|--------------|----------------------------------------|--------------------------------------|------|---------------------------------------------|-----------------------------------------------------------------------------------------------------------------------------------------------------------------|---------------------------------------------------------------------------------------------------------------------------------------------------------|------------------------------|------------------|--------------|-------------------------------------------------------------------------------------------------------------------------------------------------------------|--------------------|
| Wkba O[111]  | 2013, Ghana, West                      | ART clinic at the regional hospital  | 442  | HIV (276) HAART-naïve patients 166 on HAART | Age (years): HAART-naïve (33.42 ± 0.88), On HAART (36.91 ± 0.77)<br>Male gender: HAART-naïve (28.3%), On HAART (22.3%)                                          | eGFR < 60 mL/min/1.73 m <sup>2</sup> for > 3months                                                                                                      | CG, 186 MDRD, CKD-EPI        | Kinetic Jaffe    | Not measured | <b>Total prevalence (CKD-EPI): 10.2%</b><br>HAART naïve: 8.7%<br>CG, 9.1% MDRD, <b>8.7% CKD-EPI</b><br>On HAART: 14.5% CG, 12.6% MDRD, <b>12.6% CKD-EPI</b> | Low                |
| Stöhr W[112] | 2011, Uganda, Zimbabwe, East and South | Three centres in Uganda and Zimbabwe | 3316 | HIV-infected patients initiating ART        | Age (years): 36.8 (32-42.2)<br>Male gender: 35%<br>SBP: median:110 (IQR:100-120) mmHg<br>DBP: median:70 (60-80) mmHg<br>BMI: 21.1 (19.1–23.6) kg/m <sup>2</sup> | eGFR<60 ml/min/1.73 m <sup>2</sup> on ≥ 2 consecutive visits 80 days apart or confirmed 25% decrease if eGFR <60 ml/min/1.73 m <sup>2</sup> at baseline | CG                           | Kinetic Jaffe    | Not measured | <b>Total prevalence : 7.2%</b>                                                                                                                              | Medium             |
| Stöhr W[113] | 2008, Uganda, Zimbabwe, East and       | Three centres in Uganda and Zimbabwe | 3316 | HIV-infected patients on ART                | Age (years): 36.8 (32-42.2)<br>Male gender: 35%<br>SBP: median:110                                                                                              | eGFR<60 ml/min 1.73 m <sup>2</sup> on ≥2 consecutive occasions >80 days apart or confirmed 25%                                                          | 186 MDRD, CG                 | Kinetic Jaffe    | Not measured | <b>Total prevalence (MDRD):3.1%</b> ,<br>CG 7.4%                                                                                                            | Medium             |

1  
2  
3  
4  
5  
6  
7  
8  
9  
10  
11  
12  
13  
14  
15  
16  
17  
18  
19  
20  
21  
22  
23  
24  
25  
26  
27  
28  
29  
30  
31  
32  
33  
34  
35  
36  
37  
38  
39  
40  
41  
42  
43  
44  
45  
46  
47  
48  
49

|                  |                          |                        |      |                                 |                                                                                                                                                                                                             |                                                             |                                           |               |                        |                                                                                                                                                                              |        |
|------------------|--------------------------|------------------------|------|---------------------------------|-------------------------------------------------------------------------------------------------------------------------------------------------------------------------------------------------------------|-------------------------------------------------------------|-------------------------------------------|---------------|------------------------|------------------------------------------------------------------------------------------------------------------------------------------------------------------------------|--------|
|                  | South                    |                        |      |                                 | (IQR:100-120) mmHg<br>DBP: median:70 (60-80) mmHg<br>BMI categories:<br><18.5 kg/m <sup>2</sup> : 18%<br>18.5- <25 kg/m <sup>2</sup> : 66%<br>25-<30 kg/m <sup>2</sup> : 12%<br>≥ 30 kg/m <sup>2</sup> : 4% | decrease if eGFR <60 ml/min/1.73 m <sup>2</sup> at baseline |                                           |               |                        |                                                                                                                                                                              |        |
| Cailhol J [69]   | 2011, Burundi, Southeast | Outpatients HIV clinic | 300  | HIV-infected patients           | Age (years): 40.1 (33-46.5) Male gender: 9.7%<br>HTN: 2.7%<br>DM: 2%<br>BMI: median: 21.8 (19.3-24.2) kg/m <sup>2</sup>                                                                                     | KDIGO                                                       | Proteinuria by urinary strip, CG, 186MDRD | Not mentioned | 6.10%                  | <b>Total prevalence (MDRD): 45.7%</b><br>GG: 46.5%<br><b>Prevalence by Stages (using MDRD)</b><br>Stage 1: 30.2%<br>Stage 2:13.5%<br>Stage 3: 2%<br>Stage 4 & 5: no patients | Low    |
| Masimango MI[90] | 2014, Congo, Central     | Outpatient HIV clinic  | 235  | HIV-infected patients           | Age (years): 40.0 ± 10.7<br>Male gender: 27.8%<br>HTN: 46.8%.<br>DM: 1.7%<br>BMI: 22.3 ± 3.8 kg/m <sup>2</sup>                                                                                              | Proteinuria ≥ +1 by urinary strip or albuminuria ≥30 mg/dl  | Proteinuria by urinary strip and ACR      | Not measured  | Proteinuria ≥+1: 41.3% | <b>Total prevalence (based on proteinuria): 41.3 %</b>                                                                                                                       | Low    |
| Reid A[114]      | 2008, Uganda,            | Three centers in       | 3316 | Untreated HIV-infected patients | age(years): 36.8 (IQR: 32.0–42.2) male gender:                                                                                                                                                              | eGFR<60 ml/min 1.73 m <sup>2</sup> on ≥2 consecutive        | CG                                        | Kinetic Jaffe | Not measured           | <b>Total prevalence : 7%</b>                                                                                                                                                 | Medium |

1  
2  
3  
4  
5  
6  
7  
8  
9  
10  
11  
12  
13  
14  
15  
16  
17  
18  
19  
20  
21  
22  
23  
24  
25  
26  
27  
28  
29  
30  
31  
32  
33  
34  
35  
36  
37  
38  
39  
40  
41  
42  
43  
44  
45  
46  
47  
48  
49



|              |                           |                                                                                         |      |                                                                          |                                                                                                                                       |                                                                                                       |                                      |                 |                       |                                                                         |        |
|--------------|---------------------------|-----------------------------------------------------------------------------------------|------|--------------------------------------------------------------------------|---------------------------------------------------------------------------------------------------------------------------------------|-------------------------------------------------------------------------------------------------------|--------------------------------------|-----------------|-----------------------|-------------------------------------------------------------------------|--------|
|              | Zimbabwe, East and South  | Uganda and Zimbabwe                                                                     |      | undergoing ART intake                                                    | 35%<br>SBP: median:110 (IQR: 100-120) mmHg<br>DBP: median:70 (IQR: 60-80) mmHg<br>BMI: median, 21.1 (IQR:19.1–23.6) kg/m <sup>2</sup> | occasions >80 days apart or confirmed 25% decrease if eGFR <60 ml/min/1.73 m <sup>2</sup> at baseline |                                      |                 |                       |                                                                         |        |
| Fabian J[91] | 2009, South Africa, South | HIV outpatient clinic at Johannesburg Hospital                                          | 578  | HIV-infected naïve ART patients                                          | Age (years): 37 (range 16–70 years)<br>Male gender: 38%<br>DM: 4.6% among group with microalbuminuria                                 | Proteinuria ≥ +1 by urinary strip or albuminuria ≥30 mg/dl                                            | Proteinuria by urinary strip and PCR | Not measured    | 43.7% had proteinuria | <b>Total prevalence (based on proteinuria prevalence): 43.7%</b>        | Low    |
| Lucas G[118] | 2010, Uganda, East        | All consenting individuals residing in every household in 50 Rakai District communities | 1960 | 1202 HIV-infected patients and 664 HIV –ve age- and sex-matched controls | Age (years): HIV-ve, 28 (IQR: 24–35), HIV+ve: 30 (IQR: 25–36)<br>Male gender: HIV-ve: (38.7%), HIV+ve (36.4%)                         | eGFR< 60ml/min/1.73 m <sup>2</sup>                                                                    | MDRD                                 | IDMS-calibrated | Not measured          | <b>Total prevalence among HIV+ve : 0.7%</b>                             | Medium |
| Jao J[121]   | 2011, sub-Saharan,        | Primary health care units                                                               | 2495 | HIV-infected patients before ART                                         | Age (years): 30 (IQR: 27–35)<br>Male gender: 30%<br>BMI:22.8 (IQR: 20.4–                                                              | CrCl <50 ml/min                                                                                       | CG,186 MDRD, CKD-EPI                 | Not mentioned   | Not measured          | <b>Total prevalence (CKD-EPI with coefficient for black race): 2.5%</b> | Medium |

|              |                              |                                                                               |      |                                                |                                                                                                  |                                                                                            |                                                                   |                        |              |                                                                                                                 |     |
|--------------|------------------------------|-------------------------------------------------------------------------------|------|------------------------------------------------|--------------------------------------------------------------------------------------------------|--------------------------------------------------------------------------------------------|-------------------------------------------------------------------|------------------------|--------------|-----------------------------------------------------------------------------------------------------------------|-----|
|              |                              |                                                                               |      |                                                | 25.6) kg/m <sup>2</sup>                                                                          |                                                                                            |                                                                   |                        |              | CG: 3.4%<br>(MDRD with coefficient for black race): 2.5%                                                        |     |
| Longo A[82]  | 2012,<br>Congo,<br>Central   | Consecutive HIV patients from clinic                                          | 300  | HIV-infected (ART treated=264) (ART naïve =36) | Age (years): 43 ± 9<br>Male gender: 23%<br>Hypertension: 13%<br>BMI: 24 ± 5 (kg/m <sup>2</sup> ) | eGFR < 60 ml/min/1.73 m <sup>2</sup> / or proteinuria defined as 1+ or greater             | proteinuria by dipstick and 24-hour proteinuria, eGFR by MDRD, CG | Kinetic Jaffe and IDMS | 20.50%       | <b>Total prevalence : 20.5%</b><br><b>3% of the patients had eGFR &lt; 60 ml/min/1.73 m<sup>2</sup> by MDRD</b> | Low |
| Sarfo F[92]  | 2013,<br>Ghana,<br>West      | HIV clinic                                                                    | 3137 | HIV-infected patients starting ART             | Age (years): 38 (32-45)<br>Male gender: 33%<br>BMI: 20.3 (IQR: 17.6-22.7) kg/m <sup>2</sup>      | eGFR <60 ml/min/1.73 m <sup>2</sup> ; or proteinuria ≥+ 1 (confirmed by uPCR > 45 mg/mmol) | Proteinuria by urinary strip, ACR, PCR, eGFR by CG, MDRD, CKD-EPI | Not mentioned          |              | <b>Total prevalence (CKD-EPI): 13.8%</b>                                                                        | Low |
| Gupta S[122] | 2011,<br>Cameron,<br>Central | Electronic medical records of patients from 18 sites throughout Western Kenya | 7383 | HIV patients without ART                       | Age (years): 35.5 (29.3-44.0)<br>Male gender: 26.9%                                              | eGFR <60 ml/min/1.73 m <sup>2</sup>                                                        | CG, MDRD                                                          | Not mentioned          |              | <b>Total prevalence (MDRD): 9.4%</b><br>CG: 20.2%                                                               | Low |
| Ekat MH[115] | 2013,<br>Congo,              | Ambulatory Treatment                                                          | 562  | Newly diagnosed HIV patients                   | Age (years): 38.84 (IQR: 33.18-46.23)                                                            | eGFR < 60 ml/min/1.73m <sup>2</sup>                                                        | 186MDRD                                                           | Kinetic Jaffe          | Not measured | <b>Total prevalence : 8.5%</b>                                                                                  | Low |

|                        |                     |                                                                             |     |                                         |                                                                                                                                                                                                   |                                                                                             |                                                             |               |                                              |                                                                                                                                                    |        |
|------------------------|---------------------|-----------------------------------------------------------------------------|-----|-----------------------------------------|---------------------------------------------------------------------------------------------------------------------------------------------------------------------------------------------------|---------------------------------------------------------------------------------------------|-------------------------------------------------------------|---------------|----------------------------------------------|----------------------------------------------------------------------------------------------------------------------------------------------------|--------|
|                        | Central             | Center                                                                      |     |                                         | Male gender: 33.9%<br>BMI: 20.31 (IQR: 17.97-22.89) kg/m <sup>2</sup>                                                                                                                             |                                                                                             |                                                             |               |                                              |                                                                                                                                                    |        |
| Wools-Kaloustian K[70] | 2007, Kenya, East   | Academic Model for the Prevention and Treatment of HIV/AIDS (AMPATH) clinic | 373 | HIV-infected patients naive to ART      | Age (years): 35.0 (range, 19-60)<br>Male gender: 32.1%<br>SBP: 104.7 (range, 80-140) mm/Hg                                                                                                        | CrCl<60 ml/min/1.73 m <sup>2</sup>                                                          | proteinuria by urinary strip, CG, full and abbreviated MDRD | Kinetic assay | 6.2% (proteinuria ≥1+)                       | <b>Total prevalence :11.50%</b>                                                                                                                    | Low    |
| Emem C[71]             | 2008, Nigeria, West | Consecutive HIV/AIDS outpatient clinic                                      | 400 | HIV-infected patients                   | Age (years): 35.80 ± 10.01<br>Male gender: 48.5%<br>Hypertension: 13.2%<br>BMI categories:<br><19.0 kg/m <sup>2</sup> : 59.2 %<br>19-25 kg/m <sup>2</sup> : 37.5%<br>>25 kg/m <sup>2</sup> : 3.3% | albuminuria +1 on at least two occasions (4 weeks apart) and or serum creatinine >1.5 mg/dl | Proteinuria or albuminuria by urinary strip, CG             | Not mentioned | 21.9% nephrotic range proteinuria            | <b>Total prevalence :38 %</b><br>Among patients; 8.8% had CrCl <15 ml/min.                                                                         | Medium |
| Wyatt C[72]            | 2011, Rwanda, East  | Community based                                                             | 891 | 677 HIV-infected and 214 HIV-uninfected | Age (years): 34 (IQR: 30-39) HIV +ve/43 (IQR:34-50) HIV -ve<br>Male gender: 0<br>Hypertension: HIV+ve: 4.8%/ HIV-ve: 8.3%<br>BMI (kg/m <sup>2</sup> ): HIV+ve:                                    | eGFR<60 ml/min/1.73 m <sup>2</sup> / or proteinuria +1 or greater                           | proteinuria by urinary strip, eGFR by MDRD, CKD-EPI, CG     | Kinetic Jaffe | (9% among HIV + and 7.2% among non-infected) | <b>Total prevalence among HIV +ve:9%</b><br>2.7% had eGFR< 60 ml/min/1.73 m <sup>2</sup><br>CKD prevalence among HIV-ve: 7.2%<br>1.5% had eGFR< 60 | Medium |

|                       |                                        |                                                     |     |                                                                    |                                                                          |                                                                                                                                                                                                                                                                                                                                   |                                                               |                  |                                           |                                                                                                                       |     |
|-----------------------|----------------------------------------|-----------------------------------------------------|-----|--------------------------------------------------------------------|--------------------------------------------------------------------------|-----------------------------------------------------------------------------------------------------------------------------------------------------------------------------------------------------------------------------------------------------------------------------------------------------------------------------------|---------------------------------------------------------------|------------------|-------------------------------------------|-----------------------------------------------------------------------------------------------------------------------|-----|
|                       |                                        |                                                     |     |                                                                    | 20.9 (IQR: 19.0–23.3)/<br>HIV-ve: 20.5 (IQR: 18.5–<br>23.3)              |                                                                                                                                                                                                                                                                                                                                   |                                                               |                  |                                           | ml/min/1.73 m <sup>2</sup>                                                                                            |     |
| FolefackKaze<br>F[73] | 2013,<br>Cameron,<br>Central -<br>West | HIV clinic of<br>Yaoundé<br>general<br>hospital     | 104 | All newly<br>diagnosed HIV-<br>infected patients<br>naïve to HAART | Age (years): 35±10.7<br>Male gender: 32%                                 | The presence of<br>proteinuria +1 or more<br>and eGFR < 60 ml/min<br>based on the average of<br>eGFR by 2 equations                                                                                                                                                                                                               | Proteinuria by<br>urinary strip,<br>eGFR by CG, 175<br>MDRD   | Kinetic<br>Jaffe | 36%                                       | <b>Total prevalence :36%</b><br>Among patients; 3% had<br>eGFR < 60 ml/min/1,73<br>m <sup>2</sup>                     | Low |
| Struik G[74]          | 2011,<br>Malawi,<br>Southeast          | ART clinic in<br>a central<br>hospital in<br>Malawi | 526 | Consecutive<br>newly referred<br>HIV-infected<br>patients on ART   | Age (years): 34.3 ± 9.3;<br>Male gender: 43.5%<br>HTN: 11.2%<br>DM: 0.8% | any proteinuria (≥+1);<br>heavy proteinuria (≥+2);<br>any proteinuria (≥+1)<br>with renal dysfunction (e<br>GFR <60 ml/min/1.73<br>m <sup>2</sup> ) and heavy proteinuria<br>( ≥+2) with renal<br>dysfunction (CrCl < 60<br>mL/minute) and<br>the absence of any<br>alternative cause for renal<br>dysfunction or<br>proteinuria. | Proteinuria by<br>urinary strip,<br>eGFR by CG and<br>MDRD    | Not<br>mentioned | 23.3%                                     | <b>Total prevalence:<br/>23.3%</b><br><b>Among patients with<br/>proteinuria; 5.3% had<br/>CrCl &lt; 60 ml/minute</b> | Low |
| Attolou<br>V[97]      | 1998,<br>Benin,<br>West                | National<br>Central<br>hospital                     | 92  | HIV-infected<br>patients                                           | Age(years): 22±4<br>Male gender: 68 %                                    | Proteinuria > 0.5 g/24 hrs<br>and SCr>14 mg/l                                                                                                                                                                                                                                                                                     | Serum creatinine<br>measurement and<br>24-hour<br>proteinuria | Not<br>mentioned | Proteinuria<br>>0.5 g/24 hrs<br>in 23.33% | <b>Total<br/>prevalence:27.16%</b>                                                                                    | Low |

|               |                           |                                                         |     |                                              |                                                                                                                                                       |                                                                                                                                                                       |                                                                   |               |                  |                                                                                              |        |
|---------------|---------------------------|---------------------------------------------------------|-----|----------------------------------------------|-------------------------------------------------------------------------------------------------------------------------------------------------------|-----------------------------------------------------------------------------------------------------------------------------------------------------------------------|-------------------------------------------------------------------|---------------|------------------|----------------------------------------------------------------------------------------------|--------|
| Agaba EI[129] | 2003, Nigeria, West       | infections unit of the Jos University Teaching Hospital | 126 | Consecutive 79 AIDS patients and 57 controls |                                                                                                                                                       | Not known                                                                                                                                                             | Not known                                                         | Not known     | 25% (AIDS group) | <b>Total prevalence among AIDS group:51.80%</b><br>CKD prevalence among control group: 12.2% | Low    |
| Fana GT[83]   | 2011, Zimbabwe, South     | Outpatient clinics                                      | 159 | HIV-infected patients naïve to ART           |                                                                                                                                                       | CrCl < 60 ml/min.<br>Proteinuria ≥ +1 and/or PCR > 20 mg/mg                                                                                                           | Proteinuria by urinary strip and 24-hour proteinuria, eGFR by CG  | Not mentioned | 45.90%           | <b>Total prevalence : 45.9%</b><br>Among patients; 7.50% had CrCl< 60 ml/min                 | Low    |
| Han TM[84]    | 2006, South Africa, South | Medical center                                          | 615 | HIV patients not on ART                      | Age (years): 31(range,13-63)<br>Male gender: 25%,<br>Proteinuria -ve: 117±14/70±9<br>Microalbuminuria: 121±15/81±10<br>Macroalbuminuria: 120±12/74±11 | Microalbuminuria > urinary protein 30 and 300 mg/24 h.<br>A cut-off serum creatinine level of 250 mmol/l was used to exclude those patients with advanced nephropathy | Proteinuria by urinary strip and 24-hour proteinuria, CG and MDRD | Not mentioned | 6%               | <b>Total prevalence ( based on proteinuria ): 6%</b>                                         | Low    |
| Peters P[116] | 2008, Uganda, East        | Home-Based AIDS Care                                    | 508 | HIV patients starting HAART                  | Age (years): 39 (median)<br>Male gender: 41%                                                                                                          | CrCl of 25–50 ml/min                                                                                                                                                  | CG, 175 MDRD                                                      | Kinetic Jaffe | Not measured     | <b>Total prevalence: 20%</b>                                                                 | Low    |
| Jao J [93]    | 2011, Cameroon,           | Clinics                                                 | 389 | 199 HIV +ve and 190 HIV -ve                  | Age (years): HIV+ve (27 (IQR: 24- 31)),                                                                                                               | Proteinuria (PCR > 200 mg/g)                                                                                                                                          | Proteinuria by urinary strip and                                  | Not measured  | HIV+ve: 39.2%    | <b>Total prevalence among HIV+ve ( based on</b>                                              | Medium |

|                |                           |                           |       |                                                                                                    |                                                                                                          |                 |                                                               |               |                         |                                      |        |
|----------------|---------------------------|---------------------------|-------|----------------------------------------------------------------------------------------------------|----------------------------------------------------------------------------------------------------------|-----------------|---------------------------------------------------------------|---------------|-------------------------|--------------------------------------|--------|
|                | Central                   |                           |       | pregnant women                                                                                     | HIV-ve (27 (IQR: 22 - 31))<br>Male gender: 0                                                             |                 | PCR                                                           |               | HIV-ve: 20.9%           | <b>proteinuria ): 39.2%</b>          |        |
| Msango L[75]   | 2011, Tanzania, East      | Outpatient clinics        | 355   | HIV-infected patients naïve to ART                                                                 | Age (years): 36.1 ±7.9<br>Male gender: 35%<br>BMI (kg/m <sup>2</sup> ): 21.3 ±3.8                        | KDIGO           | Proteinuria and albuminuria by urinary strip eGFR by CG, MDRD | Not mentioned | 36%<br>proteinuria ≥ +1 | <b>Total prevalence: 85.6%</b>       | Low    |
| Myer L[123]    | 2013, South Africa, South | primary healthcare clinic | 1861  | Consecutive 238 pregnant women, 1014 non-pregnant, 609 men; HIV-infected patients eligible for ART | Age (years): pregnant, 28 (IQR: 25–32), men, 37 (IQR: 32–45), women, 33 (IQR: 28–39)<br>Male gender: 33% | CrCl< 60ml/min  | Absolute Scr and CG                                           | Not mentioned | Not measured            | <b>Total prevalence: 5.8%</b>        | Low    |
| Mulenga L[124] | 2008, Zambia, South       | Clinic                    | 25249 | HIV-infected, ART-naïve adults initiating treatment                                                | Age (years): normal CrCl, 33.7±7.9, decreased CrCl, 38.5±9.9<br>Male gender: 39.7%                       | CrCl< 60 ml/min | Absolute Scr, eGFR by CG and MDRD                             | Not mentioned | Not measured            | <b>Total prevalence (MDRD): 3.2%</b> | Medium |

HTN: hypertension, DM: diabetes mellitus, BMI: body mass index, SBP: systolic blood pressure, DBP: diastolic blood pressure, IDMS: Isotope dilution mass spectrometry, HAART: highly active antiretroviral therapy,

ART: antiretroviral therapy, MDRD: Modification of Diet in Renal Disease, CG: Cockcroft Gault , CKD-EPI: Chronic Kidney Disease Epidemiology

Table 4: Studies on CKD among diabetic patients

| Study ID          | Year, Country, Region | Location                                                     | N   | Study group                          | Population Characteristics                                                                                                                                                                   | Definition of CKD                                                                                               | Method of outcome assessment                                | Creatinine assay | proteinuria                                        | CKD prevalence                                       | Quality assessment |
|-------------------|-----------------------|--------------------------------------------------------------|-----|--------------------------------------|----------------------------------------------------------------------------------------------------------------------------------------------------------------------------------------------|-----------------------------------------------------------------------------------------------------------------|-------------------------------------------------------------|------------------|----------------------------------------------------|------------------------------------------------------|--------------------|
| Janmohamed MN[76] | 2013, Tanzania, East  | diabetes mellitus clinic of Bugando Medical Centre in Mwanza | 369 | Consecutive diabetic patients        | Age (years): 54 (IQR: 45-62)<br>Male gender: 46.6%<br>HTN: 57.5%<br>BMI (kg/m <sup>2</sup> ): 25.6 (IQR: 22.6–29.6)<br>Duration of DM (years): 6(3 – 11)<br>93.8% type 2 DM<br>6.2% type 1DM | eGFR $\leq$ 60 ml/min/1.73 m <sup>2</sup> or evidence of kidney damage (microalbuminuria or overt proteinuria). | Microalbuminuria, proteinuria by urinary strips, eGFR by CG | Kinetic Jaffe    | Overt proteinuria (34.1%), microalbuminuria(45.8%) | <b>Total prevalence:83.7%</b>                        | Low                |
| Wanjohi FW[77]    | 2002, Kenya, East     | Outpatient diabetic clinic at Kenyatta National Hospital     | 100 | Consecutive type 2 diabetic patients | Age (years): 53.7 $\pm$ 9.3<br>Male gender: 37%<br>HTN: 50%<br>BMI (kg/m <sup>2</sup> ): 27.8 $\pm$ 6.0<br>Duration of DM (months): 10.3 $\pm$ 7.5                                           | Albuminuria > 20 mg/ L                                                                                          | Albuminuria by urinary strip, CG                            | Not mentioned    | 26% had albuminuria                                | <b>Total prevalence( based on albuminuria ): 26%</b> | Low                |

|                |                                |                                                                             |     |                                                     |                                                                                                                                       |                                                                                               |                                                     |               |                                                       |                                |     |
|----------------|--------------------------------|-----------------------------------------------------------------------------|-----|-----------------------------------------------------|---------------------------------------------------------------------------------------------------------------------------------------|-----------------------------------------------------------------------------------------------|-----------------------------------------------------|---------------|-------------------------------------------------------|--------------------------------|-----|
| Bouzid C[98]   | 2011, Tunis, North             | Endocrinology center at the National Institute of nutrition                 | 689 | Type 2 diabetic patients from computerized hospital | Age (years): 60±11<br>Male gender: 39%<br>HTN: 84.6% (renal insufficiency), 57.2% (no renal disease)<br>Duration of DM (years): 11±8  | eGFR<60 ml/min                                                                                | CG, 24-hour proteinuria                             | Not mentioned | 10.1%<br>macroalbuminuria,<br>13%<br>microalbuminuria | <b>Total prevalence: 19.8%</b> | Low |
| Zajjari Y[99]  | 2012, Morocco, East            | Military hospital                                                           | 16  | Type 2 diabetic patients                            | Age (years): 60 (IQR: 47-79)<br>Male gender: 81.3%<br>HTN: 56.3%<br>Duration of DM (years): 6.5 (IQR: 1-39)                           | Not mentioned                                                                                 | 24-hour proteinuria, serum creatinine, renal biopsy | Not mentioned | Not mentioned                                         | <b>Total prevalence: 68.8%</b> | Low |
| Choukem SP[78] | 2012, Cameroon, Central - West | Two main referral centres                                                   | 420 | Consecutive type 2 diabetic patients                | Age (years): 56.7 ±9.9<br>Male gender: 49%<br>HTN: 50%<br>BMI (kg/m <sup>2</sup> ): 28.5 ±5.2<br>Duration of DM (years): 4 (IQR: 1-9) | The presence of positive proteinuria with or without low CrCl < 90 ml/min/1.73 m <sup>2</sup> | Proteinuria by urinary strip/eGFR by CG             | Not mentioned |                                                       | <b>Total prevalence: 31%</b>   | Low |
| Keeton G[100]  | 2004, South Africa, South      | Groote Schuur Hospital Outpatients Diabetic Clinic or the Somerset Hospital | 59  | Consecutive type 2 diabetic patients                | Age (years): 62 ±9.4<br>Male gender: 36%<br>BMI (kg/m <sup>2</sup> ): (31± 6)<br>Duration of DM (years): 17 (Range: 14-33)            | Double Scr level                                                                              | Proteinuria by ACR, and serum creatinine            | Not mentioned |                                                       | <b>Total prevalence: 66.1%</b> | Low |



|                     |                            |                                           |     |                                                                      |                                                                                                                                                                                                                                                                          |                                                                                                                               |                                                                        |                  |                           |                                                                   |     |
|---------------------|----------------------------|-------------------------------------------|-----|----------------------------------------------------------------------|--------------------------------------------------------------------------------------------------------------------------------------------------------------------------------------------------------------------------------------------------------------------------|-------------------------------------------------------------------------------------------------------------------------------|------------------------------------------------------------------------|------------------|---------------------------|-------------------------------------------------------------------|-----|
|                     |                            | Outpatients                               |     |                                                                      |                                                                                                                                                                                                                                                                          |                                                                                                                               |                                                                        |                  |                           |                                                                   |     |
| BouAziz[101]        | 2012,<br>Tunisia,<br>North | Basic Health<br>Group of<br>Sousse        | 115 | 73 type 2<br>diabetic<br>patients<br>and 42<br>healthy<br>volunteers | Age (mean $\pm$ SE in years):<br>59.3 $\pm$ 1.1<br>Male gender: 35%<br>SBP (mean $\pm$ SE mmHg):<br>136.3 $\pm$ 3.1<br>DBP (mean $\pm$ SE): 76.8<br>$\pm$ 1.9<br>BMI (mean $\pm$ SE in kg/m <sup>2</sup> ):<br>30.5 $\pm$ 0.7<br>Duration of DM (years):<br>10.6 $\pm$ 1 | Microalbuminuria (defined as <<br>2.8 g/mmol for women and < 2.3<br>for men) and eGFR $\leq$ 60<br>ml/min/1.73 m <sup>2</sup> | Measurement<br>of<br>microalbuminuria, eGFR by<br>MDRD                 | Not<br>mentioned |                           | <b>Total prevalence:<br/>11%</b>                                  | Low |
| Katchunga<br>P[102] | 2010,<br>Congo,<br>Central | Referral<br>general<br>hospital           | 98  | Medical<br>records of<br>type 2<br>diabetic<br>patients              | Age (years): 58 $\pm$ 10.4<br>Male gender: 35.7%<br>HTN: 59.2%<br>BMI (kg/m <sup>2</sup> ): 25.2 $\pm$ 4.7<br>Duration of DM (years):<br>17.3 $\pm$ 8.5                                                                                                                  | KDIGO                                                                                                                         | Microalbumin<br>uria (>20 mg/L<br>and <200<br>mg/L)<br>eGFR by<br>MDRD | Not<br>mentioned |                           | <b>Total prevalence:<br/>66%</b>                                  | Low |
| Djrolo F[103]       | 2001, Benin,<br>West       | National<br>University<br>hospital centre | 152 | Type 1<br>and 2<br>diabetic<br>patients                              | Age (years): 53.3(range,<br>21-90)<br>Male gender: 65.8%<br>Duration of DM (years):<br><1 – 16 or more                                                                                                                                                                   | Presence of proteinuria                                                                                                       | 24-hour<br>proteinuria                                                 | Not<br>measured  | 28%                       | <b>Total prevalence (based on<br/>proetinuria level):<br/>28%</b> | Low |
| Balogun<br>WO[85]   | 2011,<br>Nigeria,          | Tertiary<br>hospital                      | 40  | Randomly<br>selected                                                 | Age (years): 59.4 $\pm$ 11.25<br>Male gender: 37.5%                                                                                                                                                                                                                      | not mentioned                                                                                                                 | Proteinuria by<br>urinary strip                                        | Jaffe<br>method  | 82.5%<br>macroalbuminuria | <b>Total prevalence:<br/>90%</b>                                  | Low |

|                   |                       |                                     |     |                                                 |                                                                                                                                                                                                                                         |                                                                                                                                                                                             |                                                       |               |                                                                                                                         |                                                                                                                      |     |
|-------------------|-----------------------|-------------------------------------|-----|-------------------------------------------------|-----------------------------------------------------------------------------------------------------------------------------------------------------------------------------------------------------------------------------------------|---------------------------------------------------------------------------------------------------------------------------------------------------------------------------------------------|-------------------------------------------------------|---------------|-------------------------------------------------------------------------------------------------------------------------|----------------------------------------------------------------------------------------------------------------------|-----|
|                   | West                  |                                     |     | type 2 diabetic patients                        | HTN: 45%                                                                                                                                                                                                                                |                                                                                                                                                                                             | and 24 hrs, eGFR by CG                                |               |                                                                                                                         |                                                                                                                      |     |
| Mafundikwa A [86] | 2007, Zimbabwe, South | Diabetic clinic                     | 75  | Consecutive Insulin-dependent diabetic patients | No available data                                                                                                                                                                                                                       | No available data                                                                                                                                                                           | Proteinuria by urinary strips and 24-hour proteinuria |               | Overt proteinuria 21%.<br>Microalbuminuria 12%.                                                                         | <b>Total prevalence: 33%</b>                                                                                         | Low |
| Lutale J [104]    | 2007, Tanzania, East  | Outpatient diabetic clinic          | 204 | Type 1 and 2 diabetic patients                  | 45% type 1 DM<br>55% type 2DM<br>Age (years): type 1, 21(14-44.8), type 2, 53 (23.5-85)<br>Male gender: 55%<br>HTN: 42%<br>BMI (kg/m <sup>2</sup> ): 19.3 ± 3.8 (type 1), 27.8 ± 4.8 (type 2)<br>Duration of DM (years): 3(Range: 0-25) | KDIGO                                                                                                                                                                                       | Quantitative assessment of albuminuria, CrCl by CG    | Kinetic Jaffe | Type 1: microalbuminuria was 12.1% and macroalbuminuria 1.1%.<br>Type 2: microalbuminuria 9.8%<br>Macroalbuminuria 7.2% | <b>Total prevalence: 18.5%</b><br>4.6% of Type 1 patients and 22% of Type 2 had eGFR < 60 ml/min/1.73 m <sup>2</sup> | Low |
| Gill G [105]      | 2008, Ethiopia, East  | Diabetic clinic at Mekelle Hospital | 105 | All diabetic patients                           | Age (years): 41±16<br>Male gender: 70%<br>HTN: 5%<br>BMI (kg/m <sup>2</sup> ): 20.6 ±5.4<br>Duration of DM (years): 7±6                                                                                                                 | Nephropathy was considered present if the urinary ACR was >25.0mg/mmol and retinopathy was present. Microalbuminuria was diagnosed if the ACR was >2.5 and <25.0mg/mmol in men and >3.5 and | ACR, Scr                                              | Not mentioned | 51% microalbuminuria                                                                                                    | <b>Total prevalence : 53%,</b>                                                                                       | Low |

|               |                      |                 |                                           |                                                                                                                                    |                                        |                                                           |               |       |                                                                                               |        |  |
|---------------|----------------------|-----------------|-------------------------------------------|------------------------------------------------------------------------------------------------------------------------------------|----------------------------------------|-----------------------------------------------------------|---------------|-------|-----------------------------------------------------------------------------------------------|--------|--|
|               |                      |                 |                                           |                                                                                                                                    |                                        | <25.0mg/mmol in women.                                    |               |       |                                                                                               |        |  |
| Makulo R [94] | 2010, Congo, Central | Community based | 229 (81 DM, 148 impaired fasting glucose) | Age (years): 53.1±16.3<br>Male gender: 33%<br>SBP (mmHg): 128.0±5.7<br>DBP (mmHg): 78.5±13.4<br>BMI (kg/m <sup>2</sup> ): 22.6±5.2 | eGFR of <60 mL/min/1.73 m <sup>2</sup> | Urinary albumin by urinary strip and ACR, eGFR by 186MDRD | Kinetic Jaffe | 29.6% | <b>Total prevalence: 29.6%</b><br>10% of the patients had eGFR< 60 ml/min/1.73 m <sup>2</sup> | Medium |  |

HTN: hypertension, DM: diabetes mellitus, BMI: body mass index, SBP: systolic blood pressure, DBP: diastolic blood pressure, IDMS: Isotope dilution mass spectrometry, MDRD: Modification of Diet in Renal Disease, CG: Cockcroft Gault, CKD-EPI: Chronic Kidney Disease Epidemiology Collaboration

Table 5: Studies on CKD among hypertensive patients

| Study ID          | Year<br>Country<br>Region           | Location                             | N   | Study group                                   | Population characteristics                                                                                                                                                                                                                                                    | Definition of CKD                                                    | Method of outcome assessment                                    | Creatinine assay | Proteinuria  | CKD prevalence                                                                                         | Quality assessment |
|-------------------|-------------------------------------|--------------------------------------|-----|-----------------------------------------------|-------------------------------------------------------------------------------------------------------------------------------------------------------------------------------------------------------------------------------------------------------------------------------|----------------------------------------------------------------------|-----------------------------------------------------------------|------------------|--------------|--------------------------------------------------------------------------------------------------------|--------------------|
| Osafo<br>[106]    | 2011<br>C<br>Ghana<br>Central- West | four polyclinics                     | 712 | Hypertensive patients                         | Age (years): 59 (range,19–90)<br>Male gender: 21.3%<br>DM: 14.7%<br>SBP (mmHg): 150 (range,100–280)<br>DBP (mmHg): 90 (range, 60–160)<br>BMI (kg/m <sup>2</sup> ): 29.7 (range,12.2–67.4)<br>BMI categories (kg/m <sup>2</sup> ):<br><25: 22.3%<br>25-29.9: 26%<br>>30: 45.7% | KDIGO                                                                | Proteinuria by PCR (men>0.3<br>women>0.2 mg/mg)<br>eGFR by MDRD | Kinetic<br>Jaffe | 28.90%       | <b>Total prevalence: 46.90%</b><br><b>Prevalence by stage:</b><br>Stage 1-2: 19.1%<br>Stage 3-5: 27.8% | Low                |
| Ajayi<br>[125]    | 2014<br>S<br>Nigeria<br>West        | Tertiary health centre               | 628 | Records of hypertensive and diabetic patients | Age (years): 49.71±13.22<br>Male gender : 49%<br>DM: 8.6%<br>SBP (mmHg): 135.9 ± 27.4<br>DBP (mmHg): 87.0 ± 16.3<br>BMI ( kg/m <sup>2</sup> ): 27.8 ± 8.7                                                                                                                     | eGFR <60 mL/min/1.73 m <sup>2</sup>                                  | eGFR by MDRD                                                    | Not mentioned    | Not measured | <b>Total prevalence: 38.5%</b>                                                                         | Low                |
| Lengani<br>A[107] | 2000<br>Burkina Faso<br>West        | department of Cardiology or Internal | 342 | Hypertensive patients                         | Age (years): 50.6 ±13.8<br>Male gender: 58%                                                                                                                                                                                                                                   | Serum creatinine ≥ 650 µmol/l and or blood urea ≥35 mmol/l plus long | Measurement of scr, 24-hour proteinuria                         | Not mentioned    |              | <b>Total prevalence: 50.8%</b>                                                                         | Low                |

|                     |                               |                                              |      |                                        |                                                                                                                                                   |                                                                                                                                  |                                                    |                      |                                                 |                                                                                |        |
|---------------------|-------------------------------|----------------------------------------------|------|----------------------------------------|---------------------------------------------------------------------------------------------------------------------------------------------------|----------------------------------------------------------------------------------------------------------------------------------|----------------------------------------------------|----------------------|-------------------------------------------------|--------------------------------------------------------------------------------|--------|
|                     |                               | medicine                                     |      |                                        |                                                                                                                                                   | history with clinical manifestations                                                                                             |                                                    |                      |                                                 |                                                                                |        |
| Nwankwo E[126]      | 2006<br>Nigeria<br>West       | University of Maiduguri Teaching Hospital    | 185  | All hospitalized hypertensive patients | Age (years): 44.6 ± 14.9<br>Male gender: 49%                                                                                                      | Scr >135 µmol/l                                                                                                                  | Measurement of Scr                                 | Not mentioned        | Not measured                                    | <b>Total prevalence: 45.50%</b>                                                | Low    |
| Rayner B[108]       | 2006<br>South Africa<br>South | 100 General practice centres                 | 1091 | Random hypertensive patients           | Age (years): ≥35 years<br>Male gender: 48.5%<br>BMI: 23.6% of the patients had a normal BMI<br>41.9% were overweight and 34.2% were frankly obese | Albuminuria defined as (mg/mmol)<br>microalbuminuria 3-30<br>macroalbuminuria >30                                                | Quantitative assessment of albuminuria by ACR      | not measured         | 21.3% microalbuminuria<br>4.1% macroalbuminuria | <b>Total prevalence (based on albuminuria): 25.4%</b>                          | Medium |
| Plange-Rhule J [79] | 1999<br>Ghana<br>Central-West | Komfo Anokye Teaching Hospital               | 448  | Hypertensive patients                  | Age (years): 50.5 ±13.0<br>Male gender: 36%<br>SBP (mmHg): 165.0 ±27.8<br>DBP (mmHg): 101.9 ±17.9                                                 | Plasma creatinine ≥140µmol/l                                                                                                     | Proteinuria by urinary strips and serum creatinine | Not mentioned        | 25.50%                                          | <b>Total prevalence: 30.2%</b>                                                 | Low    |
| Addo J[110]         | 2009<br>Ghana<br>Central-West | seven central government ministries in Accra | 219  | Hypertensive patients                  | Age (years): 50.4± 6.6 years<br>Male gender: 64%<br>SBP (mmHg):156.0 ±21.5<br>DBP (mmHg): 95 ±13<br>BMI (kg/m <sup>2</sup> ): 27.5 ± 5.4          | Persistent proteinuria on Urinalysis in the absence of urinary tract infection and/or impaired GFR<60 ml/min/1.73 m <sup>2</sup> | Proteinuria and eGFR by MDRD                       | Enzymatic assessment | 13.4%                                           | <b>Total prevalence: 13.4%</b><br>4.1% had eGFR< 60 ml/min/1.73 m <sup>2</sup> | Medium |

HTN: hypertension, DM: diabetes mellitus, BMI: body mass index, SBP: systolic blood pressure, DBP: diastolic blood pressure, IDMS: Isotope dilution mass spectrometry, MDRD: Modification of Diet in Renal Disease, CG: Cockcroft Gault , CKD-EPI: Chronic Kidney Disease Epidemiology Collaboration

For peer review only

1  
2  
3  
4  
5  
6  
7  
8  
9  
10  
11  
12  
13  
14  
15  
16  
17  
18  
19  
20  
21  
22  
23  
24  
25  
26  
27  
28  
29  
30  
31  
32  
33  
34  
35  
36  
37  
38  
39  
40  
41  
42  
43  
44  
45  
46  
47  
48  
49

Table 6: Studies on CKD among other populations

| Study ID           | Year<br>Country<br>Region | Location                                                                    | N   | Study group                                        | Population Characteristics                                                                                | Definition of CKD                                                                                | Method of outcome assessment                  | Creatinine assay | Proteinuria | CKD prevalence                                                                                                            | Quality assessment |
|--------------------|---------------------------|-----------------------------------------------------------------------------|-----|----------------------------------------------------|-----------------------------------------------------------------------------------------------------------|--------------------------------------------------------------------------------------------------|-----------------------------------------------|------------------|-------------|---------------------------------------------------------------------------------------------------------------------------|--------------------|
| E.F K [15]         | 2013<br>Senegal<br>West   | Nephrology department of the Aristide Le Dantec University Hospital Center. | 43  | Lupus patients                                     | Age (years): 32.9<br>Male gender: 7%<br>HTN: 30%                                                          | Proteinuria > 0.5 g/24 hours with or without hematuria/renal insufficiency/abnormal renal biopsy | 24-hour proteinuria and eGFR by CG            | Not mentioned    | 51%         | <b>Total prevalence: 72%</b>                                                                                              | Low                |
| Abd ElHafeez S[68] | 2009<br>Egypt<br>North    | The Nephrology department at the Main Alexandria University hospital        | 400 | Consecutive sampling of relatives of ESRD patients | Age (years): 35.2±11.6<br>Male gender: 50.8%<br>HTN: 60%<br>DM: 11.5%<br>BMI: 28.5±5.89 kg/m <sup>2</sup> | KDIGO                                                                                            | Proteinuria by urinary strips, 186 MDRD       | Kinetic Jaffe    | 21.3%       | <b>Total prevalence 57%</b><br><b>Prevalence by stage:</b><br>Stage 1: 9%<br>Stage 2: 44%<br>Stage 3: 4%<br>Stage 4: 0.3% | medium             |
| ElSharif M[18]     | 2013<br>Sudan             | Primary health care                                                         | 252 | Patients attending the primary                     | Age (years): 43.35± 12.80<br>Male gender: 16%                                                             | eGFR of < 60 mL/min/                                                                             | Proteinuria by urinary strip and eGFR by MDRD | Not mentioned    | 24.21%      | <b>Total prevalence:</b>                                                                                                  | Low                |

1  
2  
3  
4  
5  
6  
7  
8  
9  
10  
11  
12  
13  
14  
15  
16  
17  
18  
19  
20  
21  
22  
23  
24  
25  
26  
27  
28  
29  
30  
31  
32  
33  
34  
35  
36  
37  
38  
39  
40  
41  
42  
43  
44  
45  
46  
47  
48  
49

|                 |                          |                                   |     |                                                                   |                                                                                                                                        |                                                                                                                                                                                |                                                             |                   |       |                                                                                                                                                      |        |
|-----------------|--------------------------|-----------------------------------|-----|-------------------------------------------------------------------|----------------------------------------------------------------------------------------------------------------------------------------|--------------------------------------------------------------------------------------------------------------------------------------------------------------------------------|-------------------------------------------------------------|-------------------|-------|------------------------------------------------------------------------------------------------------------------------------------------------------|--------|
|                 | Northeast                |                                   |     | health care facilities                                            | HTN: 10%<br>DM: 5.95%<br>BMI (kg/m <sup>2</sup> ): 28.67 ± 6.43<br>BMI categories (kg/m <sup>2</sup> ):<br><18: 2.38%<br>>25.13: 71.83 | 1.73 m <sup>2</sup> with or without proteinuria.                                                                                                                               |                                                             |                   |       | 10.32%                                                                                                                                               |        |
| Mo A [20]       | 2009<br>Nigeria<br>West  | Family practice clinic            | 250 | Newly registered patients who attended the Family Practice Clinic | Age (years): 50.52 ± 13.03<br>Male gender: 27.2%<br>32% elevated SBP, 30% elevated DBP<br>DM: 6%<br>Obesity: 32%                       | Persistently abnormal ACR irrespective of GFR level or persistent eGFR < 60 mL/min/1.73 m <sup>2</sup> irrespective of the presence or absence of Kidney damage after 3 months | Proteinuria by urinary strip, eGFR by MDRD                  | Standardized IDMS | 14.4% | <b>Total prevalence: 14.4%</b><br>10.4% had persistent eGFR < 60 mL/min/1.73 m <sup>2</sup>                                                          | Medium |
| Sumaili EK [19] | 2009<br>Congo<br>Central | Primary and secondary health care | 527 | At risk population randomly selected                              | Age (years): 53.9 ± 15.5<br>Male gender: 43%<br>HTN: 58.2%<br>DM: 54.5%<br>Obesity: 16%                                                | KDIGO                                                                                                                                                                          | Proteinuria by urinary strip, 24-hour proteinuria, 175 MDRD | Kinetic Jaffe     | 19%   | <b>Total prevalence: 36%</b><br><b>Prevalence by stage</b><br>stage 1: 4.2%,<br>stage 2: 6.1%,<br>stage 3: 18.3%,<br>stage 4: 1.9%,<br>stage 5: 5.7% | High   |



|                     |                               |                                                                                    |      |                                                                                                                                       |                                                                           |                                                                                              |                                                                          |               |                                                     |                                                                  |     |
|---------------------|-------------------------------|------------------------------------------------------------------------------------|------|---------------------------------------------------------------------------------------------------------------------------------------|---------------------------------------------------------------------------|----------------------------------------------------------------------------------------------|--------------------------------------------------------------------------|---------------|-----------------------------------------------------|------------------------------------------------------------------|-----|
| van Rensburg B [21] | 2010<br>South Africa<br>South | Tertiary hospital                                                                  | 1216 | New patients referred to the Renal Unit                                                                                               | Age (years): 39.6 ± 15.9<br>Male gender: 51.1%<br>HTN: 13.2%<br>DM: 10.8% | Elevated SCr(>130 µmol/L) and small kidneys on imaging without evidence of reversible causes | Proteinuria by quantitative assessment and Scr measurement               | Not mentioned | 16.7% proteinuria >3.5 g/dl                         | <b>Total prevalence: 37.9%</b>                                   | Low |
| Hamdouk M[87]       | 2011<br>Sudan<br>Northeast    | hairdressing saloons                                                               | 72   | Hairdressers                                                                                                                          | Age (years): 40±8<br>Male gender: 0%<br>Hypertension: 19.4%               | Scr level ≥2 mg/dl                                                                           | Proteinuria by urinary strip and 24 hrs Scr measurement and renal biopsy | Not mentioned | 26.4% had albuminuria                               | <b>Total prevalence: 26.4%</b><br>14% had Scr ≥2 mg/dl           | Low |
| EL-Safty I[109]     | 2003<br>Egypt<br>North        | male workers attending the out-patient clinic of the Health Insurance Organization | 81   | Male workers attending the out-patient clinic of the Health Insurance Organization (29 non-silicotics, 24 silicotics and 28 referent) | Age (years): 39.83±7.27<br>Male gender: 100%<br>Hypertension: 19.4%       | Elevated proteinuria                                                                         | Assessment of proteinuria quantitatively                                 | Not measured  | 93% among non-silica exposed<br>100% silica exposed | <b>Total prevalence (among those with Silica exposure): 100%</b> | Low |

HTN: hypertension, DM: diabetes mellitus, BMI: body mass index, SBP: systolic blood pressure, DBP: diastolic blood pressure, IDMS: Isotope dilution mass spectrometry, MDRD: Modification of Diet in Renal Disease,

CG: Cockcroft Gault, CKD-EPI: Chronic Kidney Disease Epidemiology Collaboration

## Titles and legends

**Fig. 1** Flow diagram of the study selection

**Fig. 2** Prevalence of CKD among entire general population

**Fig. 3** Main causes of CKD

## Supporting information

**S1 Table:** Search strategy adopted in PubMed and Ovid MEDLINE

**S2 Table:** Studies among CKD patients

For peer review only

**SUPPORT AND FINANCIAL DISCLOSURE:**

Samar Abd ElHafeez was granted an European Renal Association-European Dialysis and Transplantation Association (ERA-EDTA) fellowship at CNR-IFC/IBIM, Clinical Epidemiology and Physiopathology of Renal Disease and Hypertension of Reggio Calabria, Italy, and this work was completed during her training.

This article was written by in the framework of the Advisory Program of the ERA-EDTA YNP (Young Nephrologists' Platform) which is an official body of the ERA-EDTA (European Renal Association - European Dialysis and Transplant Association).

Dr. Samar Abd ElHafeez was an advisee of ERA-EDTA YNP Adviser-Advisee Program (Adviser Dr. Davide Bolignano)."

**Competing of interests:** Not declared.

**Data sharing statement:** No additional data are available.

**ACKNOWLEDGEMENTS**

We would like to thank the following professors and physicians for their help in providing the articles we evaluated in our review:

Prof. Olutayo Alebiosu, Prof.Ahmed Donia, Prof. Rashad Barsoum, Prof. Carel IJsselmuiden, Prof. Laurent Forcard, Prof. Anatole Laleye, Prof. Nestor Pakasa, Prof. Imaobong Etuk, Prof. Ifeoma Ulasi, Prof. Abubakr Abefe Sanusi, Prof. Gbenga Ayodele, Prof. Raida S. Yahya, Prof. Mohammed Benganem Gharbi, Prof. Fatma Ben Moussa, Dr.Ikechi Okpechi, Dr. Alaya Akram, Dr.Adebowale Ademola,Dr. Oluyombo Rotimi,, Dr.K S Nayak, Dr. Guy Neild, Dr.Rasheed Gbadegesin, Dr.Sidy Mohamed Seck, Dr. Amr El-Husseini Mohamed, Dr.Fasika M. Tedla, Prof. Adewale Akinsola, Prof. Olanrewaju Adedoyin, Dr.Halle Marie Patrice, Dr. Emmanuel Agaba, Prof. Miriam Adhikari, Dr. B.T Bello, Dr.Zidane Djelloul

## REFERENCES

1. Levey AS, Atkins R, Coresh J, et al. Chronic kidney disease as a global public health problem: approaches and initiatives - a position statement from Kidney Disease Improving Global Outcomes. *Kidney international* 2007;**72**(3):247-59 doi: 10.1038/sj.ki.5002343[published Online First: Epub Date].
2. Zoccali C, Kramer A, Jager KJ. Epidemiology of CKD in Europe: an uncertain scenario. *Nephrology dialysis transplantation* 2010;**25**(6):1731-33
3. Global, regional, and national age–sex specific all-cause and cause-specific mortality for 240 causes of death, 1990–2013: a systematic analysis for the Global Burden of Disease Study 2013. *The Lancet* 2015;**385**(9963):117-71 doi: 10.1016/s0140-6736(14)61682-2[published Online First: Epub Date].
4. Bello AK, Peters J, Rigby J, et al. Socioeconomic status and chronic kidney disease at presentation to a renal service in the United Kingdom. *Clinical journal of the American Society of Nephrology : CJASN* 2008;**3**(5):1316-23 doi: 10.2215/cjn.00680208[published Online First: Epub Date].
5. El Nahas AM, Bello AK. Chronic kidney disease: the global challenge. *The Lancet* 2005;**365**(9456):331-40
6. UN. World Population Prospects: The 2015 Revision, Key Findings and Advance Tables. Secondary World Population Prospects: The 2015 Revision, Key Findings and Advance Tables 2015. [http://esa.un.org/unpd/wpp/publications/files/key\\_findings\\_wpp\\_2015.pdf](http://esa.un.org/unpd/wpp/publications/files/key_findings_wpp_2015.pdf).
7. Aikins Ad-G, Unwin N, Agyemang C, et al. Commentary Tackling Africa's chronic disease burden: from the local to the global. 2010
8. Stanifer JW, Jing B, Tolan S, et al. The epidemiology of chronic kidney disease in sub-Saharan Africa: a systematic review and meta-analysis. *The Lancet Global Health* 2014;**2**(3):e174-81 doi: [http://dx.doi.org/10.1016/S2214-109X\(14\)70002-6](http://dx.doi.org/10.1016/S2214-109X(14)70002-6)[published Online First: Epub Date].
9. Anothaisintawee T, Rattanasiri S, Ingsathit A, et al. Prevalence of chronic kidney disease: a systematic review and meta-analysis. *Clinical nephrology* 2009;**71**(3):244-54
10. Liberati A, Altman DG, Tetzlaff J, et al. The PRISMA statement for reporting systematic reviews and meta-analysis of studies that evaluate health care interventions: explanation and elaboration. *Italian Journal of Public Health* 2012;**6**(4)
11. Matsha TE, Yako YY, Rensburg MA, et al. Chronic kidney diseases in mixed ancestry south African populations: prevalence, determinants and concordance between kidney function estimators. *BMC nephrology* 2013;**14**:75 doi: <http://dx.doi.org/10.1186/1471-2369-14-75>[published Online First: Epub Date].
12. Juni P, Altman DG, Egger M. Systematic reviews in health care: Assessing the quality of controlled clinical trials. *BMJ (Clinical research ed)* 2001;**323**(7303):42-6
13. Whiting P, Rutjes AW, Reitsma JB, et al. The development of QUADAS: a tool for the quality assessment of studies of diagnostic accuracy included in systematic reviews. *BMC medical research methodology* 2003;**3**:25 doi: 10.1186/1471-2288-3-25[published Online First: Epub Date].
14. Shamliyan T, Kane RL, Dickinson S. A systematic review of tools used to assess the quality of observational studies that examine incidence or prevalence and risk factors for diseases. *J Clin Epidemiol* 2010;**63**(10):1061-70 doi: 10.1016/j.jclinepi.2010.04.014[published Online First: Epub Date].
15. Ka EF, Cisse MM, Lemrabott AT, et al. [Lupus nephropathy in black patients with systemic lupus erythematosus in Senegal: 43 cases]. *Medecine et sante tropicales* 2013;**23**(3):328-31 doi: 10.1684/mst.2013.0200[published Online First: Epub Date].
16. Ghahramani N. Silica nephropathy. *The international journal of occupational and environmental medicine* 2010;**1**(3 July)
17. Sampathkumar K, Yesudas S. Hair dye poisoning and the developing world. *Journal of emergencies, trauma and shock* 2009;**2**(2):129
18. Elsharif ME, Abdulla SM, Abdalla SM, et al. The magnitude of chronic kidney diseases among primary health care attendees in Gezira state, Sudan. *Saudi journal of kidney diseases and transplantation : an official publication of the Saudi Center for Organ Transplantation, Saudi Arabia* 2013;**24**(4):807-9
19. Sumaili EK, Cohen EP, Zinga CV, et al. High prevalence of undiagnosed chronic kidney disease among at-risk population in Kinshasa, the Democratic Republic of Congo. *BMC nephrology* 2009;**10**:18 doi: 10.1186/1471-2369-10-18[published Online First: Epub Date].
20. Afolabi MO, Abioye-Kuteyi E, Arogundade FA, et al. Prevalence of chronic kidney disease in a Nigerian family practice population. *South African Family Practice* 2009;**51**(2):132-37
21. van Rensburg BW, van Staden AM, Rossouw GJ, et al. The profile of adult nephrology patients admitted to the Renal Unit of the Universitas Tertiary Hospital in Bloemfontein, South Africa from 1997 to 2006. *Nephrology Dialysis Transplantation* 2010;**25**(3):820-4 doi: <http://dx.doi.org/10.1093/ndt/gfp535>[published Online First: Epub Date].
22. El Khayat SS, Hallal K, Gharbi MB, et al. Fate of patients during the first year of dialysis. *Saudi journal of kidney diseases and transplantation : an official publication of the Saudi Center for Organ Transplantation, Saudi*

- 1  
2  
3 Arabia 2013;**24**(3):605-9
- 4 23. Seck SM, Diallo IM, Diagne SI. Epidemiological patterns of chronic kidney disease in black African elders: a  
5 retrospective study in West Africa. *Saudi Journal of Kidney Diseases & Transplantation* 2013;**24**(5):1068-72
- 6 24. Seck SM, Elhadj FK, Fall S, et al. [Adherence to therapy in sub-Saharan non-dialysed patients with chronic kidney  
7 diseases]. *Nephrologie et Therapeutique* 2008;**4**(5):325-9 doi:  
8 <http://dx.doi.org/10.1016/j.nephro.2008.02.004>[published Online First: Epub Date].
- 9 25. Bourquia A. [Autosomal dominant polycystic kidney disease (ADPKD). in Morocco. Multicenter study about 308  
10 families]. *Nephrologie* 2002;**23**(2):93-6
- 11 26. Ouattara B, Kra O, Yao H, et al. [Characteristics of chronic renal failure in black adult patients hospitalized in the  
12 Internal Medicine department of Treichville University Hospital]. *Nephrologie et Therapeutique*  
13 2011;**7**(7):531-4 doi: <http://dx.doi.org/10.1016/j.nephro.2011.03.009>[published Online First: Epub Date].
- 14 27. Lengani A, Coulibaly G, Laville M, et al. [Epidemiology of severe chronic renal insufficiency in Burkina Faso].  
15 *Sante (Montrouge, France)* 1997;**7**(6):379-83
- 16 28. Afifi AM, Mady GE, Ahmad AA, et al. Pattern of renal diseases among elderly Egyptians patients with acute or  
17 chronic renal diseases in Ain Shams University and Nasser Institute Hospitals, Cairo, Egypt. *Journal of the*  
18 *Egyptian Society of Parasitology* 2005;**35**(3):911-24
- 19 29. Diouf B, Ka EF, Niang A, et al. [Etiologies of chronic renal insufficiency in a adult internal medicine service in  
20 Dakar]. *Dakar medical* 2000;**45**(1):62-5
- 21 30. Niang A, Dial C, Ka EF, et al. [Nephrotic syndrom with focal and segmental glomerulosclerosis in Dakar:  
22 epidemiological and clinicopathological characteristics (about 134 cases)]. *Dakar medical* 2008;**53**(1):45-51
- 23 31. Sabi KA, Gnionsahe DA, Amedegnato D. [Chronic kidney failure in Togo: clinical, laboratory, and etiological  
24 aspects]. *Medecine tropicale : revue du Corps de sante coloniale* 2011;**71**(1):74-6
- 25 32. Ulasi II, Ijoma CK. The enormity of chronic kidney disease in Nigeria: the situation in a teaching hospital in South-  
26 East Nigeria. *Journal of tropical medicine* 2010;**2010**
- 27 33. Abderrahim E, Zouaghi K, Hedri H, et al. Renal replacement therapy for diabetic end-stage renal disease.  
28 Experience of a Tunisian hospital centre. 2008
- 29 34. Abdou N, Boucar D, El Hadj Fary KA, et al. Histopathological profiles of nephropathies in senegal. *Saudi journal of*  
30 *kidney diseases and transplantation : an official publication of the Saudi Center for Organ Transplantation,*  
31 *Saudi Arabia* 2003;**14**(2):212-4
- 32 35. Afifi A, El Setouhy M, El Sharkawy M, et al. Diabetic nephropathy as a cause of end-stage renal disease in Egypt: a  
33 six-year study. *Eastern Mediterranean health journal = La revue de sante de la Mediterranee orientale = al-*  
34 *Majallah al-sihhiyah li-sharq al-mutawassit* 2004;**10**(4-5):620-6
- 35 36. Afifi A, Karim MA. Renal replacement therapy in Egypt: first annual report of the Egyptian Society of Nephrology,  
36 1996. *Eastern Mediterranean health journal = La revue de sante de la Mediterranee orientale = al-Majallah al-*  
37 *sihhiyah li-sharq al-mutawassit* 1999;**5**(5):1023-9
- 38 37. Agaba EI, Wigwe CM, Agaba PA, et al. Performance of the Cockcroft-Gault and MDRD equations in adult  
39 Nigerians with chronic kidney disease. *International urology and nephrology* 2009;**41**(3):635-42 doi:  
40 10.1007/s11255-008-9515-8[published Online First: Epub Date].
- 41 38. Alashek WA, McIntyre CW, Taal MW. Epidemiology and aetiology of dialysis-treated end-stage kidney disease in  
42 Libya. *BMC nephrology* 2012;**13**:33 doi: 10.1186/1471-2369-13-33[published Online First: Epub Date].
- 43 39. Alasia DD, Emem-Chioma P, Wokoma FS. A single-center 7-year experience with end-stage renal disease care in  
44 Nigeria-a surrogate for the poor state of ESRD care in Nigeria and other sub-saharan african countries:  
45 advocacy for a global fund for ESRD care program in sub-saharan african countries. *Int J Nephrol*  
46 2012;**2012**:639653 doi: <http://dx.doi.org/10.1155/2012/639653>[published Online First: Epub Date].
- 47 40. Alebiosu CO, Ayodele OO, Abbas A, et al. Chronic renal failure at the Olabisi Onabanjo University Teaching  
48 Hospital, Sagamu, Nigeria. *African health sciences* 2006;**6**(3):132-8 doi: 10.5555/afhs.2006.6.3.132[published  
49 Online First: Epub Date].
- 50 41. Amira CO, Braimoh RW, Bello BT. Pattern of intradialytic complications at the Lagos University Teaching  
51 Hospital. *African journal of medicine and medical sciences* 2012;**41**(4):411-6
- 52 42. Arogundade FA, Sanusi AA, Hassan MO, et al. The pattern, clinical characteristics and outcome of ESRD in Ile-Ife,  
53 Nigeria: is there a change in trend? *African health sciences* 2011;**11**(4):594-601
- 54 43. Counil E, Cherni N, Kharrat M, et al. Trends of incident dialysis patients in Tunisia between 1992 and 2001.  
55 *American journal of kidney diseases : the official journal of the National Kidney Foundation* 2008;**51**(3):463-  
56 70 doi: 10.1053/j.ajkd.2007.10.032[published Online First: Epub Date].
- 57 44. Chijioke A, Makusidi AM, Kolo PM. Electrocardiographic abnormalities among dialysis naive chronic kidney  
58 disease patients in Ilorin Nigeria. *Annals of African medicine* 2012;**11**(1):21-6 doi: 10.4103/1596-  
59 3519.91011[published Online First: Epub Date].
- 60 45. Madala ND, Thusi GP, Assounga AG, et al. Characteristics of South African patients presenting with kidney disease  
in rural KwaZulu-Natal: a cross sectional study. *BMC nephrology* 2014;**15**:61 doi:  
<http://dx.doi.org/10.1186/1471-2369-15-61>[published Online First: Epub Date].
46. Okpechi IG, Ayodele OE, Rayner BL, et al. Kidney disease in elderly South Africans. *Clinical nephrology*  
2013;**79**(4):269-76 doi: <http://dx.doi.org/10.5414/CN107746>[published Online First: Epub Date].

- 1  
2  
3  
4  
5  
6  
7  
8  
9  
10  
11  
12  
13  
14  
15  
16  
17  
18  
19  
20  
21  
22  
23  
24  
25  
26  
27  
28  
29  
30  
31  
32  
33  
34  
35  
36  
37  
38  
39  
40  
41  
42  
43  
44  
45  
46  
47  
48  
49  
50  
51  
52  
53  
54  
55  
56  
57  
58  
59  
60
47. Laleye A, Awede B, Agboton B, et al. Autosomal dominant polycystic kidney disease in University Clinic of Nephrology and Haemodialysis of Cotonou: clinical and genetical findings. *Genetic Counseling* 2012;**23**(4):435-45
  48. Okunola Y, Ayodele O, Akinwusi P, et al. Haemodialysis practice in a resource-limited setting in the tropics. *Ghana medical journal* 2013;**47**(1):4-9
  49. Bello BT, Raji YR, Sanusi I, et al. Challenges of providing maintenance hemodialysis in a resource poor country: Experience from a single teaching hospital in Lagos, Southwest Nigeria. *Hemodialysis international International Symposium on Home Hemodialysis* 2013;**17**(3):427-33 doi: 10.1111/hdi.12024[published Online First: Epub Date].
  50. El Minshawy O. End-stage renal disease in the El-Minia Governorate, upper Egypt: an epidemiological study. *Saudi journal of kidney diseases and transplantation : an official publication of the Saudi Center for Organ Transplantation, Saudi Arabia* 2011;**22**(5):1048-54
  51. Okpechi IG, Rayner BL, Swanepoel CR. Nephrotic syndrome in adult black South Africans: HIV-associated nephropathy as the main culprit. *Journal of the National Medical Association* 2010;**102**(12):1193-7
  52. Madala ND, Nkwanyana N, Dubula T, et al. Predictive performance of eGFR equations in South Africans of African and Indian ancestry compared with 99mTc-DTPA imaging. *International Urology & Nephrology* 2012;**44**(3):847-55 doi: <http://dx.doi.org/10.1007/s11255-011-9928-7>[published Online First: Epub Date].
  53. El Farouki MR, Bahadi A, Hamzi MA, et al. [Profile of chronic renal failure in diabetes at initiation of hemodialysis in the nephrology and dialysis service of the military hospital in Rabat, Morocco]. *The Pan African medical journal* 2013;**15**:124 doi: 10.11604/pamj.2013.15.124.2252[published Online First: Epub Date].
  54. Okpechi I, Swanepoel C, Duffield M, et al. Patterns of renal disease in Cape Town South Africa: a 10-year review of a single-centre renal biopsy database. *Nephrology Dialysis Transplantation* 2011;**26**(6):1853-61 doi: <http://dx.doi.org/10.1093/ndt/gfq655>[published Online First: Epub Date].
  55. Niang A, Cisse MM, Mahmoud SM, et al. Pilot experience in senegal with peritoneal dialysis for end-stage renal disease. *Peritoneal Dialysis International* 2014;**34**(5):539-43 doi: <http://dx.doi.org/10.3747/pdi.2011.00327>[published Online First: Epub Date].
  56. Buargub MA. 5-year mortality in hemodialysis patients: a single center study in Tripoli. *Saudi journal of kidney diseases and transplantation : an official publication of the Saudi Center for Organ Transplantation, Saudi Arabia* 2008;**19**(2):268-73
  57. Chijioke A, Aderibigbe A, Olarenwaju TO, et al. Prevalence and pattern of cystic kidney diseases in Ilorin, Nigeria. *Saudi journal of kidney diseases and transplantation : an official publication of the Saudi Center for Organ Transplantation, Saudi Arabia* 2010;**21**(6):1172-8
  58. Elsharif ME, Elsharif EG. Causes of end-stage renal disease in Sudan: a single-center experience. *Saudi journal of kidney diseases and transplantation : an official publication of the Saudi Center for Organ Transplantation, Saudi Arabia* 2011;**22**(2):373-6
  59. Elkhatib M, Elnahed MS, Fadda S, et al. The change in the spectrum of glomerulonephritis in Egypt over the past decade. *Saudi journal of kidney diseases and transplantation : an official publication of the Saudi Center for Organ Transplantation, Saudi Arabia* 2012;**23**(5):1065-7 doi: 10.4103/1319-2442.100955[published Online First: Epub Date].
  60. Ibrahim S, Fayed A, Fadda S, et al. A five-year analysis of the incidence of glomerulonephritis at Cairo University Hospital-Egypt. *Saudi journal of kidney diseases and transplantation : an official publication of the Saudi Center for Organ Transplantation, Saudi Arabia* 2012;**23**(4):866-70 doi: 10.4103/1319-2442.98191[published Online First: Epub Date].
  61. Ayach G, El-Filali H, Saidi S, et al. Histopathological study of pure primary nephrotic syndrome in adolescents and young Moroccan adults. *Arab journal of nephrology and transplantation* 2011;**4**(3):137-40
  62. Fatiu A, Abubakr S, Muzamil H, et al. Undiagnosed hypertension and proteinuria in a market population in Ile-Ife, Nigeria. *Arab journal of nephrology and transplantation* 2011;**4**(3):141-6
  63. Traore M, Traore HA, Kardorff R, et al. The public health significance of urinary schistosomiasis as a cause of morbidity in two districts in Mali. *The American journal of tropical medicine and hygiene* 1998;**59**(3):407-13
  64. Sumaili EK, Nseka NM, Lepira FB, et al. Screening for proteinuria and chronic kidney disease risk factors in Kinshasa: a World Kidney Day 2007 study. *Nephron Clinical practice* 2008;**110**(4):c220-8 doi: 10.1159/000167869[published Online First: Epub Date].
  65. Egbi OG, Okafor UH, Miebodei KE, et al. Prevalence and correlates of chronic kidney disease among civil servants in Bayelsa state, Nigeria. *Nigerian journal of clinical practice* 2014;**17**(5):602-7 doi: <http://dx.doi.org/10.4103/1119-3077.141426>[published Online First: Epub Date].
  66. Ayodele OE, Okunola OO, Afolabi MO, et al. Prevalence of hypertension, diabetes and chronic kidney disease in participants of the 2009 World Kidney Day screening exercise in Southwest Nigeria. *Hong Kong Journal of Nephrology* 2011;**13**(2):55-63
  67. Abu-Aisha H, Elhassan A, Khamis A, et al. Chronic kidney disease in police forces households in Khartoum, Sudan: pilot report. *Arab journal of nephrology and transplantation* 2009;**2**(2):21-26
  68. The unrecognized prevalence of chronic kidney disease among family members of end stage renal disease patients [ IEA-EEF abstract 264]; 2009. *European Journal of Epidemiology*.

- 1  
2  
3 69. Cailhol J, Nkurunziza B, Izzedine H, et al. Prevalence of chronic kidney disease among people living with  
4 HIV/AIDS in Burundi: a cross-sectional study. *BMC nephrology* 2011;**12**:40 doi:  
5 <http://dx.doi.org/10.1186/1471-2369-12-40>[published Online First: Epub Date].
- 6 70. Wools-Kaloustian K, Gupta SK, Muloma E, et al. Renal disease in an antiretroviral-naive HIV-infected outpatient  
7 population in Western Kenya. *Nephrology Dialysis Transplantation* 2007;**22**(8):2208-12
- 8 71. Emem CP, Arogundade F, Sanusi A, et al. Renal disease in HIV-seropositive patients in Nigeria: an assessment of  
9 prevalence, clinical features and risk factors. *Nephrology, dialysis, transplantation : official publication of the  
10 European Dialysis and Transplant Association - European Renal Association* 2008;**23**(2):741-6 doi:  
11 10.1093/ndt/gfm836[published Online First: Epub Date].
- 12 72. Wyatt CM, Shi Q, Novak JE, et al. Prevalence of kidney disease in HIV-infected and uninfected Rwandan women.  
13 *PLoS ONE [Electronic Resource]* 2011;**6**(3):e18352 doi:  
14 <http://dx.doi.org/10.1371/journal.pone.0018352>[published Online First: Epub Date].
- 15 73. FolefackKaze F, Kengne AP, Pefura Yone EW, et al. Renal function, urinalysis abnormalities and correlates among  
16 HIV-infected Cameroonians naive to antiretroviral therapy. *Saudi Journal of Kidney Diseases &  
17 Transplantation* 2013;**24**(6):1291-7 doi: <http://dx.doi.org/10.4103/1319-2442.121280>[published  
18 Online First: Epub Date].
- 19 74. Struik GM, den Exter RA, Munthali C, et al. The prevalence of renal impairment among adults with early HIV  
20 disease in Blantyre, Malawi. *International journal of STD & AIDS* 2011;**22**(8):457-62 doi:  
21 10.1258/ijsa.2011.010521[published Online First: Epub Date].
- 22 75. Msango L, Downs JA, Kalluvya SE, et al. Renal dysfunction among HIV-infected patients starting antiretroviral  
23 therapy. *AIDS (London, England)* 2011;**25**(11):1421-5 doi:  
24 <http://dx.doi.org/10.1097/QAD.0b013e328348a4b1>[published Online First: Epub Date].
- 25 76. Janmohamed MN, Kalluvya SE, Mueller A, et al. Prevalence of chronic kidney disease in diabetic adult out-patients  
26 in Tanzania. *BMC nephrology* 2013;**14**(1):183
- 27 77. Wanjohi FW, Otieno FC, Ogola EN, et al. Nephropathy in patients with recently diagnosed type 2 diabetes mellitus  
28 in black Africans. *East African medical journal* 2002;**79**(8):399-404
- 29 78. Choukem SP, Dzudie A, Dehayem M, et al. Comparison of different blood pressure indices for the prediction of  
30 prevalent diabetic nephropathy in a sub-Saharan African population with type 2 diabetes. *The Pan African  
31 medical journal* 2012;**11**:67
- 32 79. Plange-Rhule J, Phillips R, Acheampong JW, et al. Hypertension and renal failure in Kumasi, Ghana. *Journal of  
33 human hypertension* 1999;**13**(1):37-40
- 34 80. Seck SM, Doupa D, Gueye L, et al. Chronic kidney disease epidemiology in northern Senegal: a cross-sectional  
35 study. *Iranian journal of kidney diseases* 2014;**8**(4):286-91
- 36 81. Sumaili EK, Krzesinski JM, Zinga CV, et al. Prevalence of chronic kidney disease in Kinshasa: results of a pilot  
37 study from the Democratic Republic of Congo. *Nephrology Dialysis Transplantation* 2009;**24**(1):117-22 doi:  
38 <http://dx.doi.org/10.1093/ndt/gfn469>[published Online First: Epub Date].
- 39 82. Longo AL, Lepira FB, Sumaili EK, et al. Prevalence of low estimated glomerular filtration rate, proteinuria, and  
40 associated risk factors among HIV-infected black patients using Cockcroft-Gault and modification of diet in  
41 renal disease study equations. *Journal of Acquired Immune Deficiency Syndromes: JAIDS* 2012;**59**(1):59-64  
42 doi: <http://dx.doi.org/10.1097/QAI.0b013e31823587b0f>[published Online First: Epub Date].
- 43 83. Fana GT, Ndhlovu CE. Renal dysfunction among anti-retroviral therapy naive HIV infected patients in Zimbabwe.  
44 *The Central African journal of medicine* 2011;**57**(1-4):1-5
- 45 84. Han TM, Naicker S, Ramdial PK, et al. A cross-sectional study of HIV-seropositive patients with varying degrees of  
46 proteinuria in South Africa. *Kidney international* 2006;**69**(12):2243-50
- 47 85. Balogun WO, Abbiyesuku FM. Excess renal insufficiency among type 2 diabetic patients with dip-stick positive  
48 proteinuria in a tertiary hospital. *African journal of medicine and medical sciences* 2011;**40**(4):399-403
- 49 86. Mafundikwa A, Ndhlovu CE, Gomo Z. The prevalence of diabetic nephropathy in adult patients with insulin  
50 dependent diabetes mellitus attending Parirenyatwa Diabetic Clinic, Harare. *The Central African journal of  
51 medicine* 2007;**53**(1-4):1-6
- 52 87. Hamdouk M, Abdelraheem M, Taha A, et al. The association between prolonged occupational exposure to  
53 paraphenylenediamine (hair-dye) and renal impairment. *Arab journal of nephrology and transplantation*  
54 2011;**4**(1):21-5
- 55 88. Oluyombo R, Ayodele OE, Akinwusi PO, et al. A community study of the prevalence, risk factors and pattern of  
56 chronic kidney disease in osun state, South west Nigeria. *West African journal of medicine* 2013;**32**(2):85-92
- 57 89. Prevalence of Chronic Kidney Disease and Associated Risk Factors: First Results from a Population Based  
58 Screening Program in Morocco(MAREMAR) [ASN abstract 353]; 2012. *J Am Soc Nephrol*.
- 59 90. Masimango MI, Sumaili EK, Jadoul M, et al. Prevalence of microalbuminuria and diagnostic value of dipstick  
60 proteinuria in outpatients from HIV clinics in Bukavu, the Democratic Republic of Congo. *BMC nephrology*  
2014;**15**(1):146 doi: 10.1186/1471-2369-15-146[published Online First: Epub Date].
91. Fabian J, Naicker S, Venter WD, et al. Urinary screening abnormalities in antiretroviral-naive HIV-infected  
outpatients and implications for management--a single-center study in South Africa. *Ethnicity & disease*  
2009;**19**(1 Suppl 1):S1-80-5

92. Sarfo FS, Keegan R, Appiah L, et al. High prevalence of renal dysfunction and association with risk of death amongst HIV-infected Ghanaians. *The Journal of infection* 2013;**67**(1):43-50 doi: 10.1016/j.jinf.2013.03.008[published Online First: Epub Date].
93. Jao J, Palmer D, Leus I, et al. Prevalence and predictors of proteinuria in HIV-infected and uninfected pregnant women in Cameroon. *Nephrology, dialysis, transplantation : official publication of the European Dialysis and Transplant Association - European Renal Association* 2011;**26**(9):3051-3 doi: 10.1093/ndt/gfr310[published Online First: Epub Date].
94. Makulo Jr R, Nseka MN, Jadoul M, et al. Albuminurie pathologique lors du dépistage du diabète en milieu semi-rural (cité de Kisantu en RD Congo). *Néphrologie & thérapeutique* 2010;**6**(6):513-19
95. Pruijm MT, Madeleine G, Riesen WF, et al. Prevalence of microalbuminuria in the general population of Seychelles and strong association with diabetes and hypertension independent of renal markers. *Journal of hypertension* 2008;**26**(5):871-7 doi: <http://dx.doi.org/10.1097/HJH.0b013e3282f624d9>[published Online First: Epub Date].
96. Gouda Z, Mashaal G, Bello A, et al. Egypt information, prevention, and treatment of chronic kidney disease (EGIPT-CKD) programme: Prevalence and risk factors for microalbuminuria among the relatives of patients with CKD in Egypt. *Saudi Journal of Kidney Diseases and Transplantation* 2011;**22**(5):1055
97. Attolou V, Bigot A, Ayivi B, et al. [Renal complications associated with human acquired immunodeficiency virus infection in a population of hospital patients at the Hospital and University National Center in Cotonou]. *Sante (Montrouge, France)* 1998;**8**(4):283-6
98. Bouzid C, Smida H, Kacem A, et al. [Renal failure in Tunisian patients with type 2 diabetes: frequency and related factors]. *La Tunisie medicale* 2011;**89**(1):10-5
99. Zajjari Y, Benyahia M, Ibrahim DM, et al. La néphropathie non diabétique chez les patients diabétiques de type 2 à l'hôpital militaire Mohammed V de Rabat (Maroc). *EMHJ* 2012;**18**(6)
100. Keeton GR, Smit R, Bryer A. Renal outcome of type 2 diabetes in South Africa--a 12-year follow-up study. *South African Medical Journal* 2004;**94**(9):771-5
101. Bouaziz A, Zidi I, Zidi N, et al. Nephropathy following type 2 diabetes mellitus in Tunisian population. *The West Indian medical journal* 2012;**61**(9):881-9
102. Katchunga P, Hermans MP, Manwa B, et al. [Hypertension, insulin resistance and chronic kidney disease in type 2 diabetes patients from South Kivu, DR Congo]. *Néphrologie et Thérapeutique* 2010;**6**(6):520-5 doi: <http://dx.doi.org/10.1016/j.nephro.2010.04.002>[published Online First: Epub Date].
103. Djrolo F, Attolou VG, Avode DG, et al. [Diabetic nephropathy: an epidemiological study based on proteinuria in a population of black African diabetics in Cotonou, Benin]. *Sante (Montrouge, France)* 2001;**11**(2):105-9
104. Lutale JJ, Thordarson H, Abbas ZG, et al. Microalbuminuria among type 1 and type 2 diabetic patients of African origin in Dar Es Salaam, Tanzania. *BMC nephrology* 2007;**8**(1):2
105. Gill G, Gebrekidan A, English P, et al. Diabetic complications and glycaemic control in remote North Africa. *QJM : monthly journal of the Association of Physicians* 2008;**101**(10):793-98
106. Osafo C, Mate-Kole M, Afram K, et al. Prevalence of chronic kidney disease in hypertensive patients in Ghana. *Renal failure* 2011;**33**(4):388-92 doi: <http://dx.doi.org/10.3109/0886022X.2011.565140>[published Online First: Epub Date].
107. Lengani A, Samadoulougou A, Cisse M. [Characteristics of renal disease in hypertensive morbidities in adults in Burkina Faso]. *Archives des maladies du coeur et des vaisseaux* 2000;**93**(8):1053-7
108. Rayner B, Becker P. The prevalence of microalbuminuria and ECG left ventricular hypertrophy in hypertensive patients in private practices in South Africa. *Cardiovascular Journal of Southern Africa* 2006;**17**(5):245-9
109. IA EL-S, Gadallah M, Shouman AE, et al. Subclinical nephrotoxicity caused by smoking and occupational silica exposure among Egyptian industrial workers. *Archives of medical research* 2003;**34**(5):415-21 doi: 10.1016/s0188-4409(03)00077-8[published Online First: Epub Date].
110. Addo J, Smeeth L, Leon DA. Hypertensive target organ damage in Ghanaian civil servants with hypertension. *PloS one* 2009;**4**(8):e6672 doi: 10.1371/journal.pone.0006672[published Online First: Epub Date].
111. Owiredu WK, Quaye L, Amidu N, et al. Renal insufficiency in Ghanaian HIV infected patients: need for dose adjustment. *African health sciences* 2013;**13**(1):101-11 doi: <http://dx.doi.org/10.4314/ahs.v13i1.14>[published Online First: Epub Date].
112. Stöhr W, Reid A, Walker AS, et al. Glomerular dysfunction and associated risk factors over 4-5 years following antiretroviral therapy initiation in Africa. *Antiviral therapy* 2011;**16**(7):1011-20 doi: <http://dx.doi.org/10.3851/IMP1832>[published Online First: Epub Date].
113. Stöhr W, Walker AS, Munderi P, et al. Estimating glomerular filtration rate in HIV-infected adults in Africa: comparison of Cockcroft-Gault and Modification of Diet in Renal Disease formulae. *Antiviral therapy* 2008;**13**(6):761-70
114. Reid A, Stöhr W, Walker AS, et al. Severe renal dysfunction and risk factors associated with renal impairment in HIV-infected adults in Africa initiating antiretroviral therapy. *Clinical Infectious Diseases* 2008;**46**(8):1271-81 doi: <http://dx.doi.org/10.1086/533468>[published Online First: Epub Date].
115. Ekat MH, Courpotin C, Diafouka M, et al. [Prevalence and factors associated with renal disease among patients with newly diagnoses of HIV in Brazzaville, Republic of Congo]. *Medecine et sante tropicales* 2013;**23**(2):176-80 doi: 10.1684/mst.2013.0170[published Online First: Epub Date].



- 1  
2  
3 116. Peters PJ, Moore DM, Mermin J, et al. Antiretroviral therapy improves renal function among HIV-infected  
4 Ugandans. *Kidney international* 2008;**74**(7):925-9 doi: 10.1038/ki.2008.305[published Online First: Epub  
5 Date]].
- 6 117. Odenigbo C, Oguejiofor O, Onwubuya E, et al. The prevalence of chronic kidney disease in apparently healthy  
7 retired subjects in asaba, Nigeria. *Annals of medical and health sciences research* 2014;**4**(Suppl 2):S128-32  
8 doi: 10.4103/2141-9248.138031[published Online First: Epub Date]].
- 9 118. Lucas GM, Clarke W, Kagaayi J, et al. Decreased kidney function in a community-based cohort of HIV-Infected  
10 and HIV-negative individuals in Rakai, Uganda. *Journal of Acquired Immune Deficiency Syndromes: JAIDS*  
11 2010;**55**(4):491-4 doi: <http://dx.doi.org/10.1097/QAI.0b013e3181e8d5a8>[published Online First: Epub Date]].
- 12 119. Eastwood JB, Kerry SM, Plange-Rhule J, et al. Assessment of GFR by four methods in adults in Ashanti, Ghana:  
13 the need for an eGFR equation for lean African populations.[Erratum appears in *Nephrol Dial Transplant*. 2011  
14 Dec;**26**(12):4153 Note: Emmett, Lynsey [added]; Miller, Michelle A [added]]. *Nephrology Dialysis  
15 Transplantation* 2010;**25**(7):2178-87 doi: <http://dx.doi.org/10.1093/ndt/gfp765>[published Online First: Epub  
16 Date]].
- 17 120. Matsha TE, Soita DJ, Hassan SM, et al. Deterioration, improvement of kidney function over time and determinants  
18 in the Cape Town Bellville South cohort. *Nephrology (Carlton, Vic)* 2014 doi: 10.1111/nep.12313[published  
19 Online First: Epub Date]].
- 20 121. Jao J, Lo W, Toro PL, et al. Factors associated with decreased kidney function in HIV-infected adults enrolled in  
21 the MTCT-Plus Initiative in sub-Saharan Africa. *Journal of Acquired Immune Deficiency Syndromes: JAIDS*  
22 2011;**57**(1):40-5 doi: <http://dx.doi.org/10.1097/QAI.0b013e31821008eb>[published Online First: Epub Date]].
- 23 122. Gupta SK, Ong'or WO, Shen C, et al. Reduced renal function is associated with progression to AIDS but not with  
24 overall mortality in HIV-infected Kenyan adults not initially requiring combination antiretroviral therapy.  
25 *Journal of the International AIDS Society* 2011;**14**:31 doi: 10.1186/1758-2652-14-31[published Online First:  
26 Epub Date]].
- 27 123. Myer L, Kamkuemah M, Kaplan R, et al. Low prevalence of renal dysfunction in HIV-infected pregnant women:  
28 implications for guidelines for the prevention of mother-to-child transmission of HIV. *Tropical Medicine &  
29 International Health* 2013;**18**(11):1400-5 doi: <http://dx.doi.org/10.1111/tmi.12194>[published  
30 Epub Date]].
- 31 124. Mulenga LB, Kruse G, Lakhi S, et al. Baseline renal insufficiency and risk of death among HIV-infected adults on  
32 antiretroviral therapy in Lusaka, Zambia. *AIDS (London, England)* 2008;**22**(14):1821-7 doi:  
33 <http://dx.doi.org/10.1097/QAD.0b013e328307a051>[published Online First: Epub Date]].
- 34 125. Ajayi S, Mamven M, Ojji D. eGFR and chronic kidney disease stages among newly diagnosed asymptomatic  
35 hypertensives and diabetics seen in a tertiary health center in Nigeria. *Ethnicity & disease* 2014;**24**(2):220-5
- 36 126. Nwankwo EA, Nwankwo B, Mubi B. Prevalence of impaired kidney function in hospitalized hypertensive patients  
37 in Maiduguri, Nigeria. *The Internet Journal of Internal Medicine* 2006;**6**(1)
- 38 127. Eknoyan G, Lameire N, Eckardt K, et al. KDIGO 2012 clinical practice guideline for the evaluation and  
39 management of chronic kidney disease. *Kidney international* 2013;**3**:5-14
- 40 128. Abdelsatir S, Al-Sofi A, Elamin S, et al. The potential role of nursing students in the implementation of  
41 community-based hypertension screening programs in Sudan. *Arab journal of nephrology and transplantation*  
42 2013;**6**(1):51-4
- 43 129. Agaba EI, Agaba PA, Sirisena ND, et al. Renal disease in the acquired immunodeficiency syndrome in north  
44 central Nigeria. *Nigerian journal of medicine : journal of the National Association of Resident Doctors of  
45 Nigeria* 2003;**12**(3):120-5
- 46 130. Saran R, Li Y, Robinson B, et al. US Renal Data System 2014 Annual Data Report: Epidemiology of Kidney  
47 Disease in the United States. *American journal of kidney diseases : the official journal of the National Kidney  
48 Foundation* 2015;**66**(1 Suppl 1):Svii, S1-305 doi: 10.1053/j.ajkd.2015.05.001[published Online First: Epub  
49 Date]].
- 50 131. Bruck K, Stel VS, Gambaro G, et al. CKD Prevalence Varies across the European General Population. *Journal of  
51 the American Society of Nephrology : JASN* 2016;**27**(7):2135-47 doi: 10.1681/asn.2015050542[published  
52 Online First: Epub Date]].
- 53 132. Ingsathit A, Thakkinstian A, Chairasert A, et al. Prevalence and risk factors of chronic kidney disease in the Thai  
54 adult population: Thai SEEK study. *Nephrology Dialysis Transplantation* 2010;**25**(5):1567-75
- 55 133. Singh AK, Farag YM, Mittal BV, et al. Epidemiology and risk factors of chronic kidney disease in India - results  
56 from the SEEK (Screening and Early Evaluation of Kidney Disease) study. *BMC nephrology* 2013;**14**:114 doi:  
57 10.1186/1471-2369-14-114[published Online First: Epub Date]].
- 58 134. Imai E, Horio M, Watanabe T, et al. Prevalence of chronic kidney disease in the Japanese general population.  
59 *Clinical and experimental nephrology* 2009;**13**(6):621-30 doi: 10.1007/s10157-009-0199-x[published Online  
60 First: Epub Date]].
135. Hwang SJ, Tsai JC, Chen HC. Epidemiology, impact and preventive care of chronic kidney disease in Taiwan.  
*Nephrology (Carlton, Vic)* 2010;**15** Suppl 2:3-9 doi: 10.1111/j.1440-1797.2010.01304.x[published Online  
First: Epub Date]].
136. Lin B, Shao L, Luo Q, et al. Prevalence of chronic kidney disease and its association with metabolic diseases: a

- cross-sectional survey in Zhejiang province, Eastern China. *BMC nephrology* 2014;**15**:36 doi: 10.1186/1471-2369-15-36[published Online First: Epub Date].
137. Tomonaga Y, Risch L, Szucs TD, et al. The Prevalence of Chronic Kidney Disease in a Primary Care Setting: A Swiss Cross-Sectional Study. *PloS one* 2013;**8**(7):e67848 doi: 10.1371/journal.pone.0067848[published Online First: Epub Date].
138. Jha V, Garcia-Garcia G, Iseki K, et al. Chronic kidney disease: global dimension and perspectives. *Lancet* 2013;**382**(9888):260-72 doi: 10.1016/s0140-6736(13)60687-x[published Online First: Epub Date].
139. Barsoum RS. Chronic kidney disease in the developing world. *The New England journal of medicine* 2006;**354**(10):997-9 doi: 10.1056/NEJMp058318[published Online First: Epub Date].
140. UNAIDS. HIV and AIDS estimates (2015). Secondary HIV and AIDS estimates (2015) 2015. <http://www.unaids.org/en/regionscountries/countries/senegal>.
141. UNAIDS. HIV and AIDS estimates (2015). Secondary HIV and AIDS estimates (2015) 2015. <http://www.unaids.org/en/regionscountries/countries/swaziland>.
142. Matic S, Lazarus JV, Donoghoe MC. *HIV/AIDS in Europe: moving from death sentence to chronic disease management*: World Health Organization, 2006.
143. Estrella M, Fine DM, Gallant JE, et al. HIV type 1 RNA level as a clinical indicator of renal pathology in HIV-infected patients. *Clinical infectious diseases : an official publication of the Infectious Diseases Society of America* 2006;**43**(3):377-80 doi: 10.1086/505497[published Online First: Epub Date].
144. Deti EK, Thiebaut R, Bonnet F, et al. Prevalence and factors associated with renal impairment in HIV-infected patients, ANRS C03 Aquitaine Cohort, France. *HIV Med* 2010;**11**(5):308-17 doi: 10.1111/j.1468-1293.2009.00780.x[published Online First: Epub Date].
145. Fernando SK, Finkelstein FO, Moore BA, et al. Prevalence of chronic kidney disease in an urban HIV infected population. *American Journal of the Medical Sciences* 2008;**335**(2):89-94 doi: <http://dx.doi.org/10.1097/MAJ.0b013e31812e6b34>[published Online First: Epub Date].
146. Cao Y, Gong M, Han Y, et al. Prevalence and risk factors for chronic kidney disease among HIV-infected antiretroviral therapy-naïve patients in Mainland China: A multicenter cross-sectional study. *Nephrology* 2013;**18**(4):307-12 doi: 10.1111/nep.12031[published Online First: Epub Date].
147. Rustarazo SB, Fuente SR, de Miguel SC, et al. Prevalence and spectrum of chronic kidney disease in HIV-positive patients. *European Journal of Hospital Pharmacy: Science and Practice* 2012;**19**(2):96-97
148. Menezes AM, Torelly J, Jr., Real L, et al. Prevalence and risk factors associated to chronic kidney disease in HIV-infected patients on HAART and undetectable viral load in Brazil. *PloS one* 2011;**6**(10):e26042 doi: 10.1371/journal.pone.0026042[published Online First: Epub Date].
149. Taylor BS, Sobieszcyk ME, McCutchan FE, et al. The challenge of HIV-1 subtype diversity. *The New England journal of medicine* 2008;**358**(15):1590-602 doi: 10.1056/NEJMra0706737[published Online First: Epub Date].
150. Wools-Kaloustian KK, Gupta SK. Will there be an epidemic of HIV-related chronic kidney disease in sub-Saharan Africa? Too soon to tell. *Kidney international* 2008;**74**(7):845-7 doi: 10.1038/ki.2008.326[published Online First: Epub Date].
151. Pokroy-Shapira E, Gelernter I, Molad Y. Evolution of chronic kidney disease in patients with systemic lupus erythematosus over a long-period follow-up: a single-center inception cohort study. *Clinical rheumatology* 2014;**33**(5):649-57
152. Mak A, Mok CC, Chu WP, et al. Renal damage in systemic lupus erythematosus: a comparative analysis of different age groups. *Lupus* 2007;**16**(1):28-34
153. Rabbani MA, Tahir MH, Siddiqui BK, et al. Renal involvement in systemic lupus erythematosus in Pakistan. *JPMA The Journal of the Pakistan Medical Association* 2005;**55**(8):328-32
154. Barsoum RS. End-stage renal disease in North Africa. *Kidney international Supplement* 2003(83):S111-4 doi: 10.1046/j.1523-1755.63.s83.23.x[published Online First: Epub Date].
155. Naicker S. End-stage renal disease in Sub-Saharan Africa. *Kidney inter, Suppl* 2013;**3**(2):161-63 doi: 10.1038/kisup.2013.4[published Online First: Epub Date].
156. Naicker S. Challenges for nephrology practice in Sub-Saharan Africa. *Nephrology Dialysis Transplantation* 2010 doi: 10.1093/ndt/gfp727[published Online First: Epub Date].
157. Brook MO, Bottomley MJ, Mevada C, et al. Repeat testing is essential when estimating chronic kidney disease prevalence and associated cardiovascular risk. *QJM : monthly journal of the Association of Physicians* 2012;**105**(3):247-55 doi: 10.1093/qjmed/hcr171[published Online First: Epub Date].

1  
2  
3  
4  
5  
6  
7  
8  
9  
10  
11  
12  
13  
14  
15  
16  
17  
18  
19  
20  
21  
22  
23  
24  
25  
26  
27  
28  
29  
30  
31  
32  
33  
34  
35  
36  
37  
38  
39  
40  
41  
42  
43  
44  
45  
46  
47  
48  
49  
50  
51  
52  
53  
54  
55  
56  
57  
58  
59  
60

For peer review only

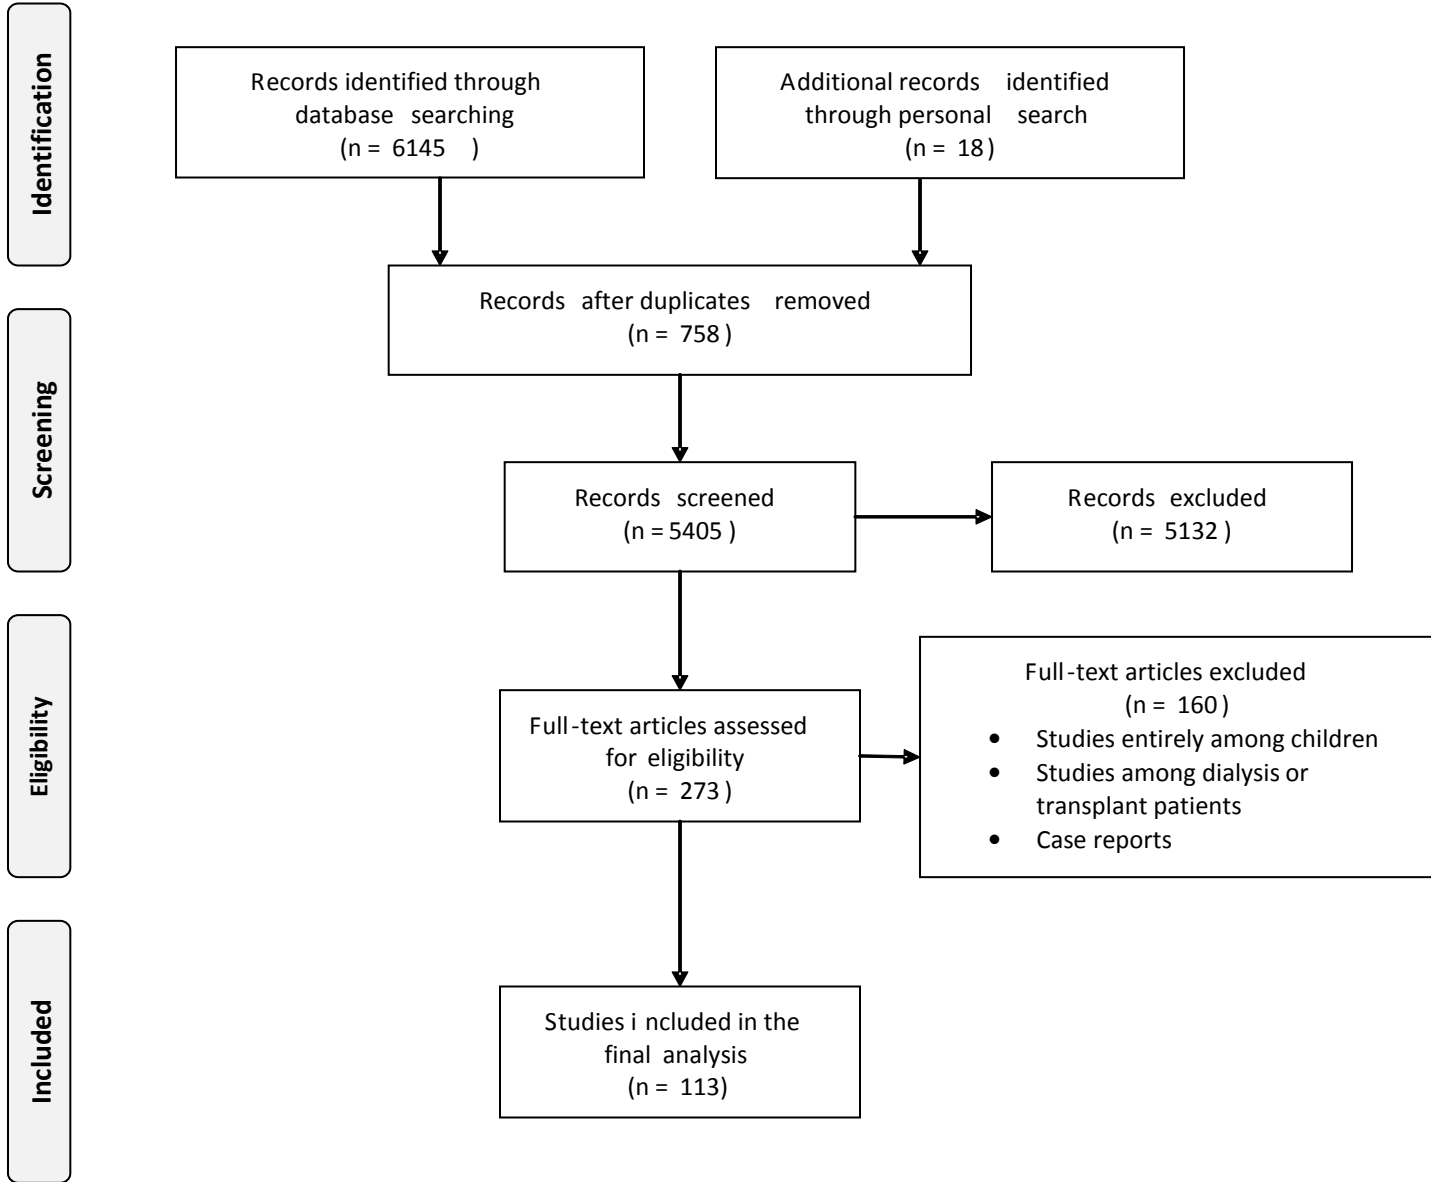

**Fig 1**

1  
2  
3  
4  
5  
6  
7  
8  
9  
10  
11  
12  
13  
14  
15  
16  
17  
18  
19  
20  
21  
22  
23  
24  
25  
26  
27  
28  
29  
30  
31  
32  
33  
34  
35  
36  
37  
38  
39  
40  
41  
42  
43

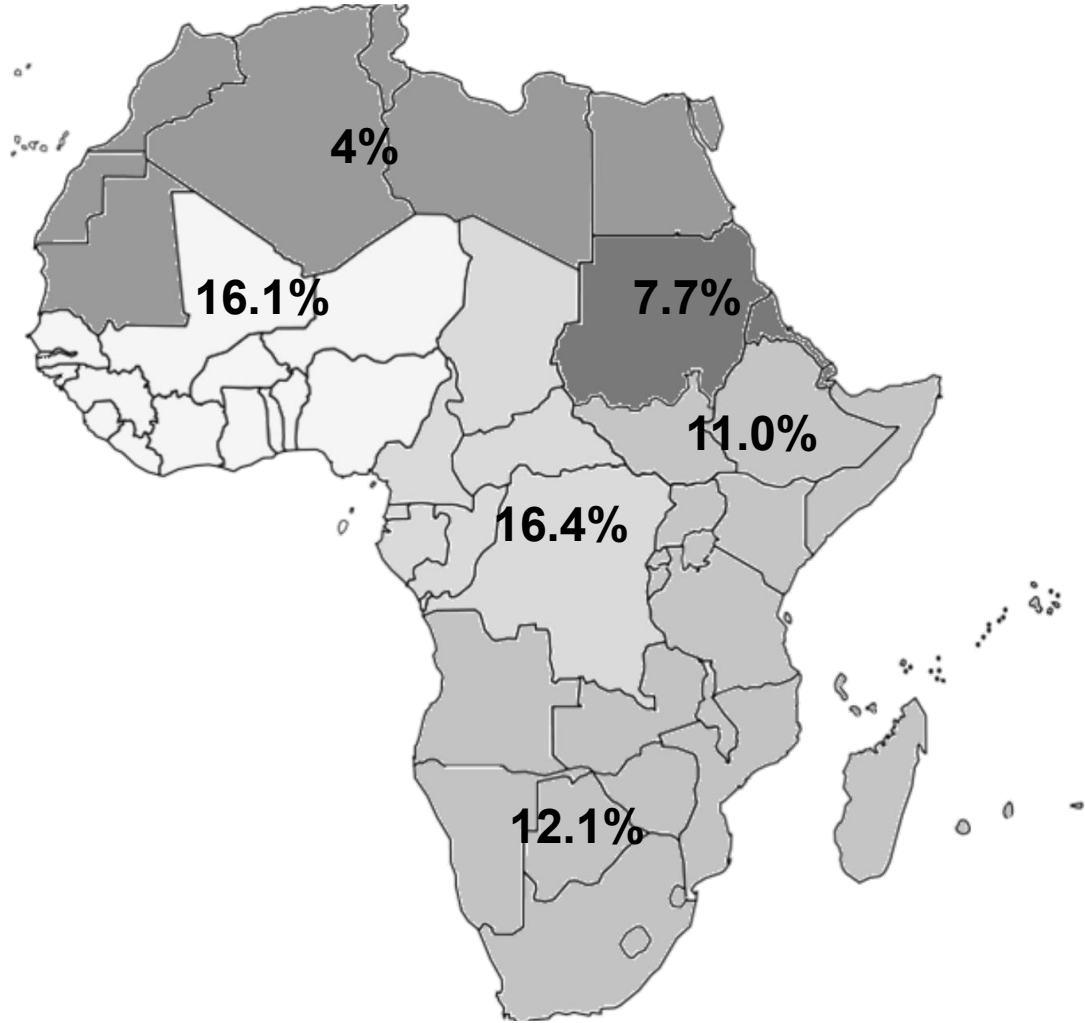

**Fig 2**

For peer review only - <http://bmjopen.bmj.com/site/about/guidelines.xhtml>

1  
2  
3  
4  
5  
6  
7  
8  
9  
10  
11  
12  
13  
14  
15  
16  
17  
18  
19  
20  
21  
22  
23  
24  
25  
26  
27  
28  
29  
30  
31  
32  
33  
34  
35  
36  
37  
38  
39  
40  
41  
42  
43

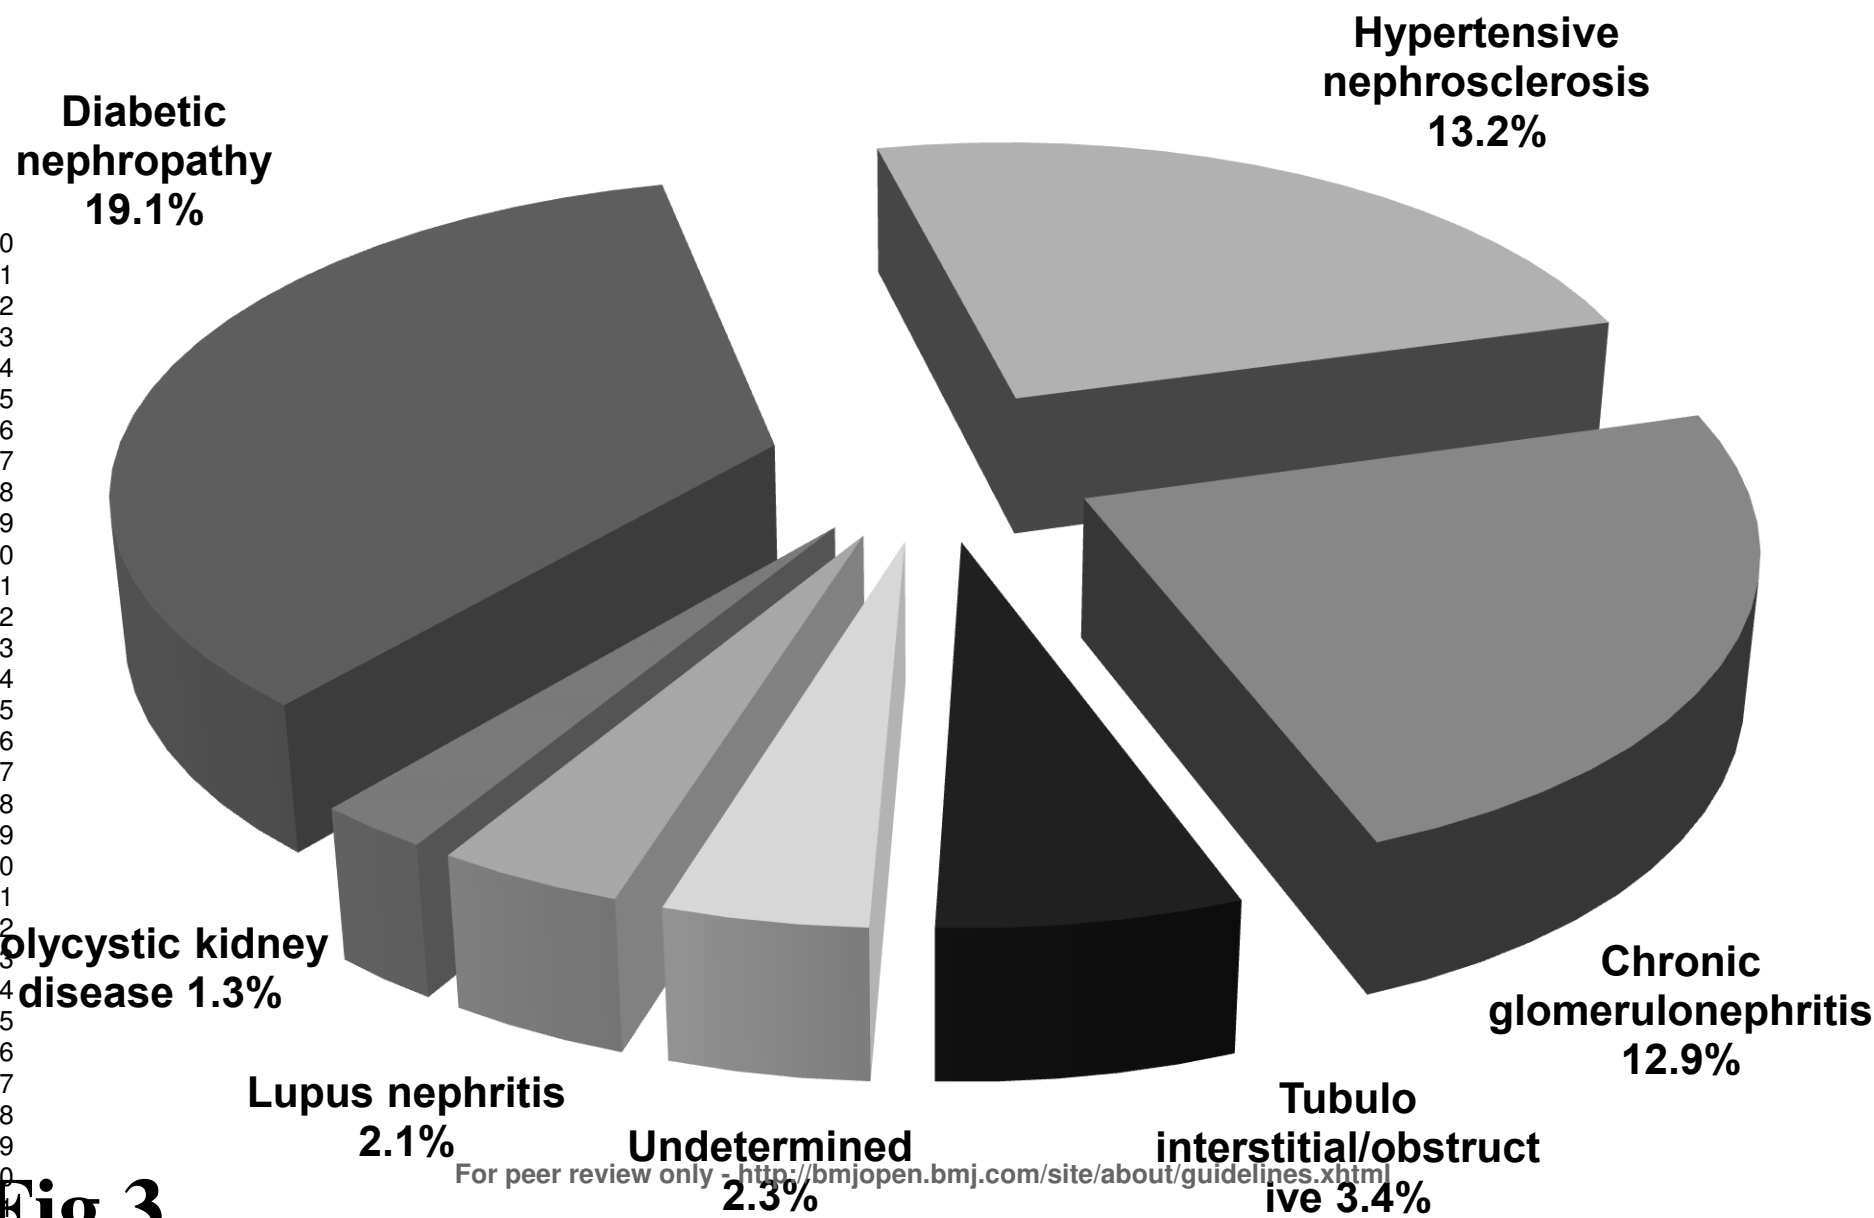

**Fig 3**

**S1 Table.** Search strategy adopted in PubMed and Ovid MEDLINE

1. exp Renal Dialysis/
2. (hemodialysis or haemodialysis).tw.
3. (hemofiltration or haemofiltration).tw.
4. (hemodiafiltration or haemodiafiltration).tw.
5. dialysis.tw.
6. (CAPD or CCPD or APD).tw.
7. Renal Insufficiency/
8. Kidney Failure/
9. exp Renal Insufficiency, Chronic/
10. Kidney Diseases/
11. Uremia/
12. (end-stage renal or end-stage kidney or endstage renal or endstage kidney).tw.
13. (ESRF or ESKF or ESRD or ESKD).tw.
14. (chronic kidney or chronic renal).tw.
15. (CKF or CKD or CRF or CRD).tw.
16. (predialysis or pre-dialysis).tw.
17. ur?emi\$.tw.
18. 1 or 2 or 3 or 4 or 5 or 6 or 7 or 8 or 9 or 10 or 11 or 12 or 13 or 14 or 15 or 16 or 17
19. afri\$.ti,ab,kw,tw,mp.
20. 18 and 19

S2 Table: Studies among CKD patients

| Study ID                  | Year<br>Country<br>Region | N   | Population Characteristic                                                                                        | biopsy | causes of CKD                                                          |
|---------------------------|---------------------------|-----|------------------------------------------------------------------------------------------------------------------|--------|------------------------------------------------------------------------|
| El Khayat S <sup>14</sup> | 2013, Morocco, North      | 134 | Age( years): 54.4±18.1<br>Male gender: 58.65%                                                                    | no     | Tub.int: 9.7%<br>DN: 44%<br>H.scl: 11.2%<br>Ch.GN: 3.7%                |
| Seck S <sup>15</sup>      | 2013, Senegal, West       | 60  | Age (years): 70.5±54.6<br>Male gender: 52%<br>HTN: 20%<br>SBP (mmHg): 167 ± 78<br>DBP (mmHg): 95 ± 55<br>DM: 18% | no     | DN: 25%<br>H.scl: 30%                                                  |
| Seck S <sup>16</sup>      | 2008, Senegal, West       | 118 | Age (years): 39.28±16.4<br>Male gender: 56%<br>SBP (mmHg): 160±15<br>DBP (mmHg): 90±15                           | yes    | Tub.int: 12%<br>H.scl: 20%<br>Ch.GN: 35%                               |
| Bourquia A <sup>17</sup>  | 2002, Morocco, North      | 420 | Age (years): 46±3<br>Male gender: 52%                                                                            | no     | PKD: 3%                                                                |
| Ouattara B <sup>18</sup>  | 2011, Ivory Coast, West   | 301 | Age (years): 44±10<br>Male gender: 56%<br>HTN: 33.5%<br>DM: 12.3%                                                | no     | Tub.int: 10.3%<br>DN: 9.65%<br>Ch.GN: 17%<br>undetermined:<br>29.2%    |
| Lengani A <sup>19</sup>   | 1997, Burkina Faso, West  | 174 | Age (years): 36±15<br>Male gender: 63%<br>HTN: 64.9%                                                             | no     | Tub.int: 16.1%<br>Ch.GN: 42.5%<br>PKD: 16.1%<br>undetermined:<br>14.4% |
| Afifi A <sup>20</sup>     | 2005, Egypt, North        | 220 | Not known                                                                                                        | no     | DN: 28.2%<br>H.scl: 25.5%<br>obstructive: 5.9%                         |
| Diouf B <sup>21</sup>     | 2000, Senegal, West       | 261 | Age (years): 44(range:15-88)<br>Male gender: 46%                                                                 | no     | DN: 20.5%<br>H.scl: 34.23%                                             |



|                            |                     |      |                                                                                               |           |                                                                                             |
|----------------------------|---------------------|------|-----------------------------------------------------------------------------------------------|-----------|---------------------------------------------------------------------------------------------|
|                            |                     |      |                                                                                               |           | Ch.GN: 15%                                                                                  |
| Niang A <sup>22</sup>      | 2008, Senegal, West | 258  | Age (years): 28 (range:15-79)<br>Male gender: 75%<br>HTN: 12.2%                               | yes       | FSGS: 42%<br>Tub.int: 10%                                                                   |
| Sabi K A <sup>23</sup>     | 2011, Togo, West    | 398  | Age (years): mean: 42.6<br>Male gender: 57%                                                   | not known | Tub.int: 20.9%<br>Ch.GN: 40.2%                                                              |
| Ulasi I <sup>24</sup>      | 2010, Nigeria, West | 1538 | Age (years): 42.55±15.43<br>Male gender: 65%<br>HTN: 17.2%<br>DM: 11.8%                       | yes       | FSGS: 40.5%<br>H.scl: 17.2%                                                                 |
| AbdErrahim E <sup>25</sup> | 2001, Tunis, North  | 299  | Age (years): 38.3±14.6<br>Male gender: 69%                                                    | no        | DN: 20.3%                                                                                   |
| Abdou N <sup>26</sup>      | 2003, Senegal, West | 115  | Age (years): 28 (IQR:5-60)<br>Male gender: 56%                                                | yes       | FSGS: 67%<br>MGN: 12.5%<br>DN: 23.5%<br>SLE: 55%<br>undetermined: 7%                        |
| Afifi A <sup>27</sup>      | 2004, Egypt, North  | 3172 | Age (years): 56.5±29.2                                                                        | yes       | DN: 14.5%                                                                                   |
| Afifi A <sup>28</sup>      | 1999, Egypt, North  | 4905 | Age (years): 45.6±14.2<br>Male gender: 62.4%                                                  | yes       | DN: 8.9%<br>H.scl: 28%<br>obstructive: 15%<br>PKD: 3%<br>undetermined: 16.2%                |
| Agaba EI <sup>29</sup>     | 2009, Nigeria, West | 130  | Age (years): 41±16<br>Male gender: 68%                                                        | no        | DN: 17.5%<br>H.scl: 29.7%<br>Ch.GN: 45.6%                                                   |
| Alashek W <sup>30</sup>    | 2012, Libya, North  | 2417 | Age (years): 49 (range: 36-61)<br>Male gender: 58%                                            | no        | DN: 13.3%<br>H.scl: 26.1%<br>Ch.GN: 41.2%                                                   |
| Alasia D <sup>31</sup>     | 2012, Nigeria, West | 320  | Age (years): 46.2±17.6<br>Male gender: 63%<br>SBP (mmHg): 171.2±31.9<br>DBP(mmHg): 102.5±27.4 | yes       | DN: 13.4%<br>H.scl: 42.8%<br>obstructive: 14.9%<br>SLE: 1%<br>Ch.GN: 15.9%<br>undetermined: |

|                             |                           |      |                                                                                                                                                          |     |                                                                            |
|-----------------------------|---------------------------|------|----------------------------------------------------------------------------------------------------------------------------------------------------------|-----|----------------------------------------------------------------------------|
|                             |                           |      |                                                                                                                                                          |     | 9.5%                                                                       |
| Alebiosu C O <sup>32</sup>  | 2006, Nigeria, West       | 153  | Age (years): 39.6±14.8<br>Male gender: 59%<br>HTN: 38.5%<br>SBP (mmHg): 167.3±15.5<br>DBP (mmHg): 106±28.9<br>DM: 13.1%                                  | no  | Tub.int: 2.2%<br>H.scl: 31.1%<br>Ch.GN: 43.7%                              |
| Amira CO <sup>33</sup>      | 2012, Nigeria, West       | 201  | Age (years): 47.5±15.7<br>Male gender: 56.2<br>HTN: 42.8%<br>DM: 13.4%                                                                                   | no  | DN: 16.1%<br>H.scl: 7.6%<br>Ch.GN: 1.8%<br>PKD: 2.9%                       |
| Arogundade FA <sup>34</sup> | 2011, Nigeria, West       | 760  | Age(years): 36 (range:15-90)<br>Male gender: 70.3%<br>HTN: 72.4%<br>SBP (mmHg): 160 (range:120 – 270)<br>DBP (mmHg): 100 (range:50 – 209 )               | no  | FSGS: 79.2%                                                                |
| Counil É <sup>35</sup>      | 2008, Tunis, North        | 6397 | Age (years): 51.4±18.0<br>Male gender: 56.5%                                                                                                             | no  | DN: 14.7%<br>H.scl: 52.8%<br>PKD: 17.2%                                    |
| Chijioke A <sup>36</sup>    | 2012 , Nigeria ,West      | 116  | Age (years): Male: 50.89±13.43 and Female: 48.22±14.70<br>Male gender: 61.2%<br>SBP(mmHg): 153.41±27.12<br>DBP (mmHg): 93.92±17.19                       | no  | Tub.int: 17.1%<br>Ch.GN: 36%                                               |
| Madala ND <sup>37</sup>     | 2014, South Africa, South | 302  | Age (years): 47.1±17.0<br>Male gender: 45%<br>SBP (mmHg): (male) 144.6 ± 28.3. (female)141.1 ± 25.5<br>DBP(mmHg): (male)84.2 ± 18.1. (female)81.0 ± 19.0 | yes | PKD: 1.8%                                                                  |
| Okpechi IG <sup>38</sup>    | 2013, South Africa, South | 111  | Age (years): 66.3 ± 5.7<br>Male gender: 47.7%<br>HTN: 71%<br>DM: 19.8%                                                                                   | yes | DN: 22.2%<br>H.scl: 38.8%<br>Ch.GN: 28.8%<br>PKD: 2.7%                     |
| Laleye A <sup>39</sup>      | 2012, Benin, West         | 3783 | Age (years): 47.2 (range:29 - 70 )<br>Male gender: 24%<br>HTN: 59%                                                                                       | no  | DN: 12.5%<br>H.scl: 45%<br>obstructive: 12.5%<br>Ch.GN: 15.8%<br>PKD: 3.3% |

|                             |                           |      |                                                                                                                                                                         |     |                                                                                     |
|-----------------------------|---------------------------|------|-------------------------------------------------------------------------------------------------------------------------------------------------------------------------|-----|-------------------------------------------------------------------------------------|
| Okunola Y <sup>40</sup>     | 2013, Nigeria, West       | 300  | Age (years): 49 ± 16.25<br>Male gender: 68%                                                                                                                             | no  | Ch.GN: 58%                                                                          |
| Bello BT <sup>41</sup>      | 2013, Nigeria, West       | 120  | Age (years): 47 + 14<br>Male gender: 60%<br>SBP(mmHg): 162 ± 32<br>DBP(mmHg): 94.9 ± 19.6                                                                               | yes | Tub.int: 8.8%<br>DN: 7.4%<br>H.scl: 34.2%<br>Ch.GN: 39.2%<br>undetermined:<br>3.45% |
| El-Minshawy O <sup>42</sup> | 2011, Egypt, North        | 800  | Age(years): 46 ± 13<br>Male gender: 65%                                                                                                                                 | no  | DN: 11.5%<br>H.scl: 34.6%<br>Ch.GN: 39%<br>PKD: 6.9%<br>undetermined:<br>7.5%       |
| Okpechi IG <sup>43</sup>    | 2010, South Africa, South | 294  | Age (years): 33.9 ± 12.0<br>Male gender: 45.2%<br>HTN:39.8%                                                                                                             | yes | Tub.int: 1.2%<br>DN: 26.5%<br>H.scl: 14.6%<br>obstructive: 5%<br>Ch.GN: 21.2%       |
| Madala N <sup>44</sup>      | 2012, South Africa, South | 148  | Age(years): 41.4 ± 13.1<br>Male gender: 37.2%<br>SBP (mmHg): African (133.6 ± 20.2). Indian (130.1 ± 20.6)<br>DBP (mmHg): African:(133.6 ± 20.2). Indian (130.1 ± 20.6) | no  | DN: 41.5%<br>H.scl: 14.6%<br>Ch.GN: 16%<br>undetermined:<br>15.55%                  |
| El Farouki M <sup>45</sup>  | 2013, Morocco, North      | 207  | Age (years): 52.43 ± 15.48<br>Male gender: 64.3%<br>HTN: 73.9%<br>DM:41.5%                                                                                              | no  | FSGS: 10.5%<br>MGN: 35%<br>H.scl: 18%<br>SLE: 39%                                   |
| Okpechi I <sup>46</sup>     | 2011, South Africa, South | 1284 | Age (years): 36.8 ± 14.0 years<br>Male gender: 45.2%                                                                                                                    | yes | DN: 19.4%<br>H.scl: 40%<br>Ch.GN: 21%                                               |
| Niang A <sup>47</sup>       | 2014, Senegal, West       | 62   | Age (years): 47 ± 13 years<br>Male gender: 55%                                                                                                                          | no  | DN: 27.5%<br>H.scl: 10.5%<br>Ch.GN: 8%                                              |
| Buargub M <sup>48</sup>     | 2008, Libya, North        | 124  | Age (years): 47.4 ± 15<br>Male gender: 62%                                                                                                                              | no  | PKD: 30%                                                                            |

|                          |                             |     |                                                                                    |     |                                                                   |
|--------------------------|-----------------------------|-----|------------------------------------------------------------------------------------|-----|-------------------------------------------------------------------|
| Chijioke A <sup>49</sup> | 2010, Nigeria, Central-West | 67  | Age (years): 47.4 ± 16.2<br>Male gender: 57%                                       | no  | H.scl: 20%<br>obstructive: 15%<br>Ch.GN: 11%<br>undetermined: 27% |
| Elsharif M <sup>50</sup> | 2011, Sudan, Northeast      | 224 | Age (years): 45.78± 17.16<br>Male gender: 67.8%                                    | yes | H.scl: 14.3%<br>obstructive: 11.6%<br>undetermined: 53.5%         |
| Elkhatib <sup>51</sup>   | 2012, Egypt, North          | 437 | Age (years): 89% <50 years. 8.5% 50–60 years and 3% > 50 years<br>Male gender: 52% | yes | FSGS: 6.8%<br>MGN: 10.9%<br>SLE: 24.7%                            |
| Ibrahim S <sup>52</sup>  | 2012, Egypt, North          | 924 | Age (years): 26.5 ± 14.6 years<br>Male gender: 47%                                 | yes | FSGS: 20.2%<br>MGN: 10.5%<br>SLE: 8.6%                            |
| Ayach G <sup>53</sup>    | 2011, Morocco, North        | 386 | Age (years): 19 (IQR:12-25)<br>Male gender: 61%                                    | yes | Tub.int: 5.6%<br>DN: 29.8%<br>H.scl: 77.8%<br>Ch.GN: 35%          |

Tub. Int: tubulo-interstitial, DN: diabetic nephropathy, H Scl: hypertensive sclerosis, ch GN: chronic glomerulonephritis, PKD: polycystic kidney disease, HTN: hypertension, DM: diabetes mellitus

# BMJ Open

## CHRONIC KIDNEY DISEASE IN AFRICA: A SYSTEMATIC REVIEW

|                                 |                                                                                                                                                                                                                                                                                                                                                                                                                                                                                                                                                                                                            |
|---------------------------------|------------------------------------------------------------------------------------------------------------------------------------------------------------------------------------------------------------------------------------------------------------------------------------------------------------------------------------------------------------------------------------------------------------------------------------------------------------------------------------------------------------------------------------------------------------------------------------------------------------|
| Journal:                        | <i>BMJ Open</i>                                                                                                                                                                                                                                                                                                                                                                                                                                                                                                                                                                                            |
| Manuscript ID                   | bmjopen-2016-015069.R1                                                                                                                                                                                                                                                                                                                                                                                                                                                                                                                                                                                     |
| Article Type:                   | Research                                                                                                                                                                                                                                                                                                                                                                                                                                                                                                                                                                                                   |
| Date Submitted by the Author:   | 26-Apr-2017                                                                                                                                                                                                                                                                                                                                                                                                                                                                                                                                                                                                |
| Complete List of Authors:       | Abd ElHafeez, Samar; Alexandria University High Institute of Public Health, Epidemiology<br>Bologna, Davide; CNR-IFC, Clinical Epidemiology of Renal Diseases and Hypertension, Reggio Cal Unit<br>D'Arrigo, Graziella; CNR-IFC, Clinical Epidemiology of Renal Diseases and Hypertension, Reggio Cal Unit<br>Dounousi, Evangelia; University of Ioannina School of Medicine, Nephrology<br>Tripepi, Giovanni; CNR-IFC, Clinical Epidemiology of Renal Diseases and Hypertension, Reggio Cal Unit<br>Zoccali, Carmine; CNR-IFC, Clinical Epidemiology of Renal Diseases and Hypertension, Reggio Cal Unit; |
| <b>Primary Subject Heading</b>: | Epidemiology                                                                                                                                                                                                                                                                                                                                                                                                                                                                                                                                                                                               |
| Secondary Subject Heading:      | Renal medicine, Research methods                                                                                                                                                                                                                                                                                                                                                                                                                                                                                                                                                                           |
| Keywords:                       | CKD, Africa, Systematic review                                                                                                                                                                                                                                                                                                                                                                                                                                                                                                                                                                             |
|                                 |                                                                                                                                                                                                                                                                                                                                                                                                                                                                                                                                                                                                            |

SCHOLARONE™  
Manuscripts

only

1  
2  
3 1 **TITLE PAGE**4 2  
5 3 **CHRONIC KIDNEY DISEASE IN AFRICA: A SYSTEMATIC REVIEW**6 4  
7 5 *Samar Abd ElHafeez<sup>1</sup> Dr.PH, Davide Bolignano<sup>2</sup> MD; Graziella D'Arrigo<sup>2</sup>, Ph.D; Evangelia Dounousi<sup>3</sup>,Ph.D;*  
8 6 *Giovanni Tripepi<sup>2</sup>, Ph.D; Carmine Zoccali<sup>2</sup>, FASN, FNKF, FERA*9 7  
10 8 <sup>1</sup>*High Institute of Public Health - Alexandria University, Epidemiology, Alexandria, EGYPT*11 9 <sup>2</sup>*CNR/IFC, Clin. Epid. and Physiopath. of Renal Dis. and Hypert., Reggio Calabria, ITALY*12 10 <sup>3</sup>*Department of Nephrology, School of Health Sciences - University of Ioannina, Ioannina, GREECE*13 11  
14 12 Correspondence:

15 13 Prof. Carmine Zoccali

16 14 CNR Clinical Epidemiology and Physiopathology of Renal Diseases and Hypertension of Reggio  
17 15 Calabria, c/o Nefrologia e CNR Ospedali Riuniti 89124 Reggio Cal, ITALY

18 16 Email: carmine.zoccali@tin.it

19 17 FAX 0039.0965.26879

20 18 **Word count:**21 19 **Abstract: 300**22 20 **Body of the manuscript: 4535**23 21 **Keywords:** CKD, Africa, systematic review  
24 22  
25 23  
26 24  
27 25  
28 26  
29 27  
30 28  
31 29  
32 30  
33 31  
34 32  
35 33  
36 34  
37 35  
38 36  
39 37  
40 38  
41 39  
42 40  
43 41  
44 42  
45 43  
46 44  
47 45  
48 46  
49 47  
50 48  
51 49  
52 50  
53 51  
54 52  
55 53  
56 54  
57 55  
58 56  
59 57  
60 58

## ABSTRACT

**Objectives:** While increasing attention is being paid to the rising prevalence of chronic diseases in Africa, there is little focus on chronic kidney disease (CKD). This systematic review assesses the CKD burden among the general population and high-risk groups on the entire African continent

**Design, setting, and participants:** We searched the MEDLINE and PUBMED databases for articles published between January 1<sup>st</sup>, 1995 and April 7<sup>th</sup>, 2017 by sensitive search strategies focusing on CKD surveys at the community level and high risk groups. In total, 7918 references were evaluated, of which 7766 articles were excluded because they did not meet the inclusion criteria. Thus, 152 studies were included in the final analysis

**Outcome measurement:** The pooled prevalence rate of CKD was expressed as a point estimate and 95% CI. No meta-analysis was done. Data were presented for different population.

**Results:** In the community-level studies, based on available medium and high quality studies, the pooled prevalence of CKD in Africa was 10.1% (95% CI: 9.8%-10.5%). West/Central-West had the highest prevalence (16.5%), followed by Central (16%), Southern (12.2%), Eastern (11.0%), and North (4%) Africa. The prevalence in sub-Saharan Africa was 14.02%. The pooled prevalence of CKD in the high risk groups was 5.6% (95% CI: 5.4-5.8%) in HIV (based on available medium and high quality studies), 24.7% (95% CI: 23.6-25.7%) in diabetes (based on all available studies which are of low quality except four of medium quality) and 34.5% (95 % CI: 34.04%-36%) in hypertensive patients (based on all available studies which are of low quality except two of medium quality)

**Conclusion:** In Africa, CKD is a public health problem, mainly attributed to high risk conditions as hypertension and diabetes. The poor data quality restricts the validity of the findings and draws the attention to the importance of designing future robust studies

### Strengths and limitations of the study

- This systematic review assessed the CKD burden among the general population and high-risk groups on the entire African continent based on studies that covered all Africa from January 1<sup>st</sup>, 1995 till April 7<sup>th</sup>, 2017
- The quality of the included articles was assessed based on standard criteria dealing with clinical trials, diagnostic studies, and observational studies. The articles were assessed based on the population sampling and precision, sampling technique, response rate, and exclusion rate.
- No meta-analysis was conducted in this review due to the huge discrepancy in the definition used to identify CKD, the methods of creatinine measurement, urine protein assessment, and in the quality of the reporting.
- The review findings were limited by the low quality of the majority of studies in Africa
- The prevalence of CKD reported in this review should be interpreted with caution due to the bias introduced from the heterogeneity between studies, analytical and methodological issues, sample size, and study population selection

## 1 INTRODUCTION

2 Chronic kidney disease (CKD) is an emerging global public health problem <sup>1</sup>. The disease is a  
3 component of a new epidemic of chronic conditions that replaced malnutrition and infection as  
4 leading causes of mortality during the twentieth century<sup>2</sup>. Age-standardized death rates due to CKD  
5 have increased during the last 23 years. CKD has shifted from the 36<sup>th</sup> cause of death in 1990 to the  
6 19<sup>th</sup> cause in 2013<sup>3</sup>. The worldwide increase in CKD and kidney failure—necessitating renal  
7 replacement therapy (RRT) —and the high rate of cardiovascular mortality and morbidity  
8 attributable to CKD are poised to reach epidemic proportions over the next decade. CKD  
9 complications represent a considerable burden on global health care resources and only a small  
10 number of countries have sufficiently robust economies to meet the challenge posed by this disease.  
11 Socioeconomic differences in health exist and individuals of lower socioeconomic status (SES)  
12 have a higher risk for mortality and morbidity compared with those of higher SES<sup>4</sup>. A change in the  
13 global approach to CKD from the treatment of ESRD to intensive primary and secondary  
14 prevention is therefore considered an absolute public health priority<sup>5</sup>.

15 Africa is the second largest continent in the world, with a population of over 1 billion; 961.5  
16 million people live in sub-Saharan Africa and 195 million in Northern Africa<sup>6</sup>. Africa now faces  
17 the dual challenge of infectious illnesses and chronic diseases. Africa's chronic disease burden is  
18 secondary to various factors, including increased life expectancy, changing lifestyle practices,  
19 poverty, urbanization and globalization<sup>7</sup>. The World Health Assembly advocated the Global Action  
20 Plan for the Prevention and Control of non-communicable diseases 2013–2020. One of its targets is  
21 to reduce premature mortality from chronic diseases by 25% in 2025. These actions have the  
22 potential to make a significant impact on the burden of CKD<sup>8</sup>. Unfortunately, CKD problem  
23 remains underestimated on the entire continent due to lack of epidemiological information from  
24 different African countries. There exists only a single systematic review conducted in sub-Saharan  
25 Africa which concluded that CKD is a prevalent and potentially escalating disease across Sub-



1 Saharan Africa, with both communicable and non-communicable risk factors<sup>9</sup>. Strategies aimed at  
2 managing CKD epidemics in Africa critically depend on a reliable assessment of the burden of the  
3 problem and the establishment of affordable early detection programs. Previous studies reported the  
4 prevalence of CKD among the general population or the specific prevalence of this condition in  
5 diseases that are recognized as drivers of renal damage (e.g., diabetes mellitus). These estimates  
6 have varied across studies due to differences in the methods of Glomerular Filtration Rate (GFR)  
7 measurement, background risk (general population vs. high risk groups), or demographic  
8 characteristics (e.g., age, gender)<sup>10</sup>.  
9 With this background in mind, this review aimed to increase the systematic information on the  
10 burden of CKD in the general population and high risk groups of the entire African continent and  
11 provide an estimate of the prevalence of CKD in different regions of Africa.

## 12 **MATERIALS AND METHODS**

### 13 **Data source and search strategy**

14 We followed the Preferred Reporting Items for Systematic Reviews and Meta-Analyses (PRISMA)  
15 Guidelines<sup>11</sup>. A systematic literature search was performed in the PubMed and OVID-MEDLINE  
16 databases by two authors (DB and SA) to identify articles reporting epidemiology data on CKD in  
17 the adult population in any geographic area of the African continent. This employed focused, highly  
18 sensitive search strategies (S1 Table). The search covered the time frame from January 1<sup>st</sup>, 1995 to  
19 April 7th, 2017. Papers without language and study design restrictions were located and screened.  
20 References from relevant studies were screened for supplementary articles.

### 21 **Study selection and data extraction**

22 Titles and abstracts were screened independently by two authors (SA and GD), who discarded  
23 studies that were not relevant to the topic. Case reports, reviews, editorials, letters, and studies  
24 focusing on African-Americans not living on the African continent, conducted entirely among  
25 children, or dealing with acute kidney injury or kidney transplantation were excluded. Two authors  
26

1  
2  
3  
4  
5  
6  
7  
8  
9  
10  
11  
12  
13  
14  
15  
16  
17  
18  
19  
20  
21  
22  
23  
24  
25  
26  
27  
28  
29  
30  
31  
32  
33  
34  
35  
36  
37  
38  
39  
40  
41  
42  
43  
44  
45  
46  
47  
48  
49  
50  
51  
52  
53  
54  
55  
56  
57  
58  
59  
60

(SA, ED) independently assessed the retrieved abstracts and the full texts of these studies to determine eligibility according to the inclusion criteria. Disagreements were resolved through discussion and consensus, or through consultation with a third reviewer (DB), who solved these differences based on study judgments. Furthermore, screening of reference lists of all of the retrieved studies was conducted to check for relevant articles, and a supplementary scan of the reference lists of the systematic reviews was performed to identify any additional studies. Data were extracted from full-text articles and registered using a specifically designed form. These data included study design, geographical area, sample size, the definition of CKD used, prevalence of CKD, age, gender, GFR measurement, type of creatinine assay, proteinuria, the method of outcome assessment and associated comorbidities such as diabetes mellitus and hypertension. Data extraction was performed by one reviewer (SA) and independently verified by another reviewer (DB).

## Data extraction and analysis

Studies were categorized according to the reference population as follows: 1) studies dealing with the general population and 2) studies focusing on particular diseases such as diabetes, hypertension, lupus and HIV or settings, e.g., hospital- based surveys and occupational studies.

Information on the assessment of kidney function was collected, including: the equation adopted for GFR estimation ((Cockcroft-Gault(CG), Modification of Diet in Renal Disease (MDRD), Chronic Kidney Disease-Epidemiology Collaboration (CKD-EPI)), the type of creatinine assay (Jaffe, standardized or unknown), and the type of proteinuria or albuminuria assay used (semi-quantitative assessment by urinary strips or quantitative in urine samples or 24 h collection). When the study included two or three GFR equations, we defined the CKD prevalence based on the CKD-EPI equation whenever this information was provided. Otherwise, we considered the MDRD equation and lastly the CG equation. In the case of ethnicity correction<sup>12-14</sup>, we included the equation which corrected for ethnicity. Information on the definition of CKD used in each study was also included ((either the internationally accepted definition as Kidney Disease Outcome Quality Initiative (KDOQI), or other ways of defining CKD)).

## Quality assessment

Two independent authors (SA and DB) appraised each article independently and assessed its quality based on standard criteria described into details in previous methodology reviews dealing with clinical trials<sup>15</sup>, diagnostic studies<sup>16</sup>, and observational studies<sup>17</sup>. The articles were assessed based on the subject sampling and precision, sampling technique, response rate, method of assessment of kidney function, and exclusion rate

## Statistical analyses

The principal demographic and clinical data for each study were summarized as the mean and standard deviation or as absolute number and percentage, as appropriate. The age range in each study was also recorded. The pooled prevalence rate of CKD was expressed as a point estimate and 95% CI. The prevalence from each study was weighed by the sample size then the pooled prevalence was categorized by the African region. The inter-rater agreement for inclusion and quality assessment was determined using Cohen's kappa ( $\kappa$ ) coefficient<sup>18</sup>. The percentage of the different causes of CKD was weighed by the sample size of each study done among CKD patients. Then we simply summed the number of patients for each etiological factor and divided it by the total sample size from the whole included studies. No meta-analysis was conducted in this study. Data were appropriately presented for different populations (general population and CKD patients). The patients' data were stratified by the type of underlying condition, i.e., hypertension, diabetes mellitus, HIV, or systemic lupus erythematosus. All calculations were conducted using SPSS for Windows, version 21, Chicago, Illinois, USA.

## RESULTS

### Search results

The flow diagram of the selection process is depicted in (Fig. 1). In total, 7897 potentially relevant references were initially retrieved. Twenty-one additional citations were found through a personal

1 search. By screening titles and abstracts, a total 7534 citations were excluded because of search  
2 overlap, dealing with the wrong population (African American, AKI, cancer or post-transplant  
3 patients), or not providing actual data on CKD. Review articles, case reports, editorials, or letters  
4 were also excluded. Amongst the 384 studies selected for full text examination, 232 were excluded  
5 because they dealt with a population different from that specifically targeted in this systematic  
6 review, such as paediatric populations (122 studies), transplant patients (n=44), or others (n=46)  
7 (e.g., Africans living in non-African countries), or because only narrative data were provided  
8 (n=20). A total 152 articles were therefore reviewed in detail and included in the analysis. The main  
9 characteristics of these studies are summarized in Table 1. The inter-rater agreement for inclusion  
10 was  $\kappa=0.90$  and for the quality assessment was  $\kappa=0.85$ .

## 11 Study characteristics

12 Amongst the 152 studies reviewed, 29 were general population studies (Table 2). One-  
13 hundred twenty-three studies focused on selected groups, of which 42 included HIV patients (Table  
14 3), 18 studied diabetic patients (Table 4), nine included hypertensive subjects (Table 5) and twelve  
15 were conducted in other populations (Table 6), including one study in lupus patients<sup>19</sup>, one study in  
16 rheumatoid arthritis patients<sup>20</sup>, one study among sickle cell anemia patients<sup>21</sup>, two in specific  
17 occupational settings (silica exposure<sup>22</sup> and exposure to the nephrotoxic hair-dye,  
18 paraphenylenediamine<sup>23</sup>) and seven studies in family practice<sup>24-26</sup> or hospital-based<sup>27-30</sup> surveys.  
19 Forty-two studies conducted among CKD patients (S2 Table)<sup>31-72</sup>.

20 The studies that were included covered all regions of Africa. The highest number of the studies  
21 came from the Western macro-area (n=54), followed by the Eastern macro-area (n=32), Southern  
22 macro-area (n=25). Twenty studies were retrieved from the Northern Africa, eight studies from  
23 each of the Central macro-area and the Central-Western macro- area. Three studies were conducted  
24 in both the Eastern and Southern regions and two studies in the Sub-Saharan region.

## 1 **Assessment of kidney function impairment**

2 Urinary markers for kidney disease were assessed in seventy-eight (71%) among one-  
3 hundred ten studies conducted in the general population, high risk groups, occupational or hospital-  
4 based studies. Proteinuria was assessed by a semi-quantitative method (urinary strips) in twenty-  
5 eight studies<sup>21,24,26,29,73-96</sup>. Twenty studies used dipstick with confirmation by quantitative  
6 methods, nine of which used dipsticks to identify proteinuria/albuminuria with confirmation by 24-  
7 hour proteinuria<sup>25,97-104</sup> whereas eleven studies used dipstick with confirmation by the protein-to-  
8 creatinine ratio or albumin-to-creatinine ratio<sup>105-115</sup>. Quantitative methods for the assessment of  
9 proteinuria/albuminuria (24-hour proteinuria or albuminuria, PCR, immunoassay, or ACR) were  
10 applied in twenty-nine studies<sup>19,27,28,30,116-140</sup>. In one study, the method of proteinuria assessment  
11 was not mentioned<sup>141</sup>.

12 Serum creatinine was measured in ninety-five studies (86%). The Jaffe assay was used in  
13 thirty studies<sup>29,30,76,80,82,83,86,90,95,97,102,105,111,113,124,126,130,131,136,142-152</sup> whereas the IDMS-  
14 calibrated method was used in fifteen studies<sup>12,14,21,26,115,117,132-134,141,153-157</sup>. In nine studies, both  
15 the Jaffe assay and the calibrated serum creatinine were used<sup>13,20,25,91,98,99,106,112,158</sup>. In the  
16 remaining forty-one studies provided no information on the method of creatinine measurement<sup>19,24</sup>  
17<sup>,27,28,78,79,81,84,85,87-89,93,94,96,100,101,104,109,114,116,118-122,125,127,135,137-139,159-167</sup>. With respect to the  
18 formula used for estimating GFR, the MDRD equation was used in thirty studies<sup>24-26,28,29,94-97,105</sup>  
19<sup>,106,111,113,116,117,121,122,126,130,133,134,136,141,146,149,153,154,158,159,164</sup> and the CG equation was used in  
20 eighteen<sup>19,76,81,86-88,93,100,102,114,119,124,138,143,145,150,162,167</sup>. The other fourteen studies used both  
21 the CG and the MDRD equations<sup>78-80,83-85,98,99,101,144,147,152,161,163</sup>, whereas fifteen studies  
22 estimated GFR by the CG, MDRD, and the CKD-EPI methods<sup>12-14,20,82,90,91,109,112,115,139,142,155,156</sup>  
23<sup>,160</sup>. Six studies used MDRD and CKD-EPI<sup>131,132,137,148,151,157</sup> and two studies used CKD-EPI<sup>21</sup>  
24<sup>,166</sup>. In other two studies the formula was not mentioned<sup>30,135</sup>.

## 1 Definition of CKD

2 Thirty-one studies defined the presence of CKD as an eGFR below 60 ml/min/1.73 m<sup>2</sup> <sup>12,14</sup>  
3 <sup>,20,80,93-96,111,117,119,139,146,148-159,161-164,166,167</sup>, with chronicity confirmed by repeated testing in four  
4 other studies <sup>142-145</sup>. Moreover, twenty-eight studies reported CKD prevalence based on eGFR  
5 below 60 ml/min/1.73 m<sup>2</sup> and/or the presence of proteinuria or albuminuria <sup>21,24,26,76,78,82-84,86,91,99</sup>  
6 <sup>,100,105,106,109,112-114,121,130-137,141</sup>. Proteinuria/albuminuria was used alone to identify CKD in  
7 fourteen studies <sup>73-75,77,87,92,107,108,110,123,128,129,138,140</sup>. KDOQI staging <sup>168</sup> of CKD was used in  
8 thirteen studies <sup>13,25,29,79,85,90,97,98,115,116,122,124,126</sup>. The serum creatinine level (either doubling, or  
9 an increase above a certain threshold) was considered to be a marker of the presence of CKD in four  
10 studies <sup>89,104,120,165</sup>. In sixteen studies, the definition of CKD was either not mentioned or was  
11 defined in various ways, including personal history, Creatinine Clearance (CrCl) ≤50 ml/min,  
12 clinical manifestations, the presence of albuminuria, elevated serum creatinine, and the average of  
13 two measurements of eGFR < 90 ml/min/1.73 m<sup>2</sup> <sup>2,19,27,28,30,81,88,101-103,118,125,127,147,160,169,170</sup>.

## 14 Paper quality

15 Paper quality was high in sixteen studies <sup>13,25,75,90,91,97,98,105,106,112,116,132-134,148,155</sup>. Thirty-five  
16 studies were of medium quality <sup>12,14,26,29,73,74,77-79,81,82,96,110,111,115,117,128,130,131,137,141,143-145,150-</sup>  
17 <sup>152,154,157,159-161,163,166,167</sup>. The rest of the studies were of low quality.

## 18 Prevalence of CKD

19 Based on the prevalence of eGFR <60 ml/min/1.73m<sup>2</sup> and/or the presence  
20 albuminuria/proteinuria (the current definition of CKD by KDOQI) <sup>168</sup> reported in the 24 medium-  
21 high quality studies in **Table 2** the pooled prevalence of CKD in the general population in Africa  
22 was 10.1% (95% CI: 9.8%-10.5%). The highest prevalence was reported in the West/Central-West  
23 (16.5%), followed by the Central region (16%), Southern (12.2%), Eastern (11.0%), and North (4%)  
24 Africa (Fig. 2). The pooled prevalence in Sub-Saharan Africa was 14.02% (95% CI: 13.5- 14.5 %).

25 Among HIV patients (**Table 3**), the pooled prevalence of CKD (estimated as above on the

1 basis of the KDOQI definition in the eighteen medium quality studies in the same table) was 5.6%  
2 (95% CI: 5.4-5.8%). Based on the treatment status, the prevalence of renal dysfunction was 9.9%  
3 (95 % CI: 9.4- 10.4%) among HIV patients not receiving treatment while the prevalence was 5.2%  
4 (95 % CI: 5.0-5.4%) among HIV patients on anti-retroviral therapy .The West/ Central-West  
5 recorded the highest prevalence of CKD among HIV patients (11.6%), followed by the East  
6 (11.2%) , and South (3.5%) macro-areas. The prevalence was reported to be 5.7% among the 3  
7 studies done in both the East and South macro- areas and 2.5% from the study done in the sub-  
8 Saharan area

9 Among diabetic patients (**Table 4**, all studies are of low quality except for four with medium  
10 quality), the pooled prevalence of CKD was 24.7% (95%CI: 23.6-25.7%). The highest prevalence  
11 was in the Eastern (46.9%), followed by the Central (40.8%), West/Central-West (27.7%), South  
12 (23.0%), and North (18.9%) Africa. One study was done in sub-Saharan reported that the  
13 prevalence was 13%

14 The pooled prevalence of CKD among hypertensive patients (**TABLE 5**, 9 studies; all of  
15 low quality except for two with medium quality) was 34.5% (95 % CI: 34.04%-36%). The highest  
16 prevalence was reported from one study in the East macro-area (39.5%) followed by the  
17 West/Central-West (37.7%), South (25.4%) Africa. No data were found for other African macro-  
18 areas.

19 Among other patient populations (studies reported in Table 6), almost three quarters of the  
20 lupus patients had CKD (prevalence=72.0%) based on low quality study <sup>19</sup>. Hospital-based surveys  
21 revealed that ( the calculation was based on **the total prevalence** reported from all studies including  
22 three of high-medium quality and 4 of low quality in the same table ) more than one third of  
23 patients attending either primary care centres or tertiary hospitals had CKD (pooled prevalence=  
24 36%, 95% CI: 34.4-37.7%). CKD was prevalent among almost 39% of rheumatoid arthritis <sup>20</sup>or  
25 sickle cell patients <sup>21</sup>. The study (low quality) conducted among hairdressers exposed to  
26 paraphenylenediamine<sup>104</sup> reported that 26.4% of these subjects had renal impairment. Of note,

100% of silica-exposed workers experienced proteinuria ( reported from low quality study)<sup>129</sup>.

The prevalence of CKD was variable based on definition used to diagnose CKD. Based on medium-high quality studies; CKD had a 6.2 % prevalence (95% CI: 6.0- 6.4%) in population studies defining this disease as an eGFR below 60 ml/min/1.73 m<sup>2</sup><sup>12,14,96,111,117,148,150-152,154,155,157,159,163,166,167</sup>. When CKD was diagnosed based on eGFR below 60 ml/min/1.73 m<sup>2</sup> and/or the presence of proteinuria or albuminuria<sup>26,78,82,91,105,106,112,114,130-134,141</sup>; the prevalence was 7.3 % (95 %CI: 6.9-7.7%). The prevalence of CKD was 22.5 % (95% CI: 21.5- 23.5%) in studies where the disease was defined on the basis of proteinuria<sup>73-75,77,110,128</sup>. When KDOQI definition (i.e. by combining the eGFR and proteinuria/albuminuria) was used<sup>13,25,29,79,90,97,98,115,116</sup>, the prevalence of CKD was 19.7% (95% CI: 18.7-20.8%)

## Causes of CKD

Forty-two studies were conducted specifically to clarify the underlying cause of CKD<sup>31-72</sup>. (S2 Table) The diagnosis was biopsy-proven in seventeen studies<sup>33,39,41,43-45,48,54,55,58,60,63,67-70,72</sup>. Diabetic nephropathy was the leading cause of CKD (20%), followed by hypertensive nephrosclerosis (13.5%), chronic glomerulonephritis (13%), tubulo-interstitial/obstructive (3.6%), lupus nephritis (2.1%), and polycystic kidney disease (2%). In nine studies, the diagnosis remained undetermined (2.5%). (Fig. 3)

## DISCUSSION

This systematic review focuses on the burden of CKD on the entire African continent. We assessed 152 papers published between January 1<sup>st</sup>, 1995 until April 7<sup>th</sup>, 2017, reporting the epidemiology of CKD in the general population and in specific chronic conditions in Africa. The CKD prevalence reported in our review should be interpreted with caution. Our estimates may be affected by the analytical heterogeneity used to measure creatinine and albuminuria. Serum creatinine concentrations are affected by intra-individual variability with over 20% changes within a 2-week period<sup>171</sup> and most Jaffe assays overestimate serum creatinine<sup>172</sup>. The resulting bias could vary



1 according to the creatinine concentration, specific assay, manufacturer, and calibration material  
2 used. Although the IDMS calibration standardization has reduced the bias and improved the Inter  
3 laboratory comparability<sup>173</sup>, the number of studies reported using IDMS was low in Africa.  
4 Moreover, CKD prevalence may additionally be influenced by albuminuria assays which are  
5 affected by the inter laboratory differences<sup>174</sup>. The different equations used to estimate GFR could  
6 be a source of bias. The systematic underestimation of measured GFR at higher estimated GFR by  
7 the MDRD equation is well known, and may reflect higher creatinine generation in healthy  
8 individuals compared with individuals with CKD in whom the MDRD equation was derived. This  
9 bias is reduced substantially, but not completely, by the CKD-EPI equation, which was derived  
10 from studies including people without CKD<sup>175</sup>. In addition, differences in sample size,  
11 demographics, and clinical characteristics, are all significant limitations in this systematic review  
12 for making accurate estimates of the prevalence of CKD in African countries. Furthermore, only  
13 five studies<sup>79,142-145</sup> assessed the KDOQI chronicity criterion, which is a fundamental element  
14 of the current definition of CKD by this organization. Thus, estimates in this review should be  
15 seen as a pragmatic attempt to evaluate the dimension of CKD as a public health issue on the  
16 African continent.

17 CKD is now considered to be an important component of the epidemic of non-communicable  
18 diseases in economically developed and developing countries alike. In a seminal meta-analysis  
19 published in 2014 Stanifer et al.,<sup>9</sup> for the first time drew attention to the public health  
20 relevance of CKD in the sub-Saharan Africa, a vast area comprising 85% (947.4 million) of  
21 the whole African population<sup>9</sup>. In the present systematic review, the lowest prevalence of CKD  
22 (4%) was reported in the Northern Africa macro-area; including Egypt, Libya, Tunisia, Algeria,  
23 Morocco, the Western Sahara, and Mauritania, and the highest (16.5%) was observed in West/  
24 Central-West Africa, which includes Benin, Burkina Faso, the island nation of Cape Verde,  
25 Gambia, Ghana, Guinea, Guinea-Bissau, Ivory Coast, Liberia, Mali, Mauritania, Niger, Nigeria,  
26 Cameroon, the island of Saint Helena, Senegal, Sierra Leone, São Tomé and Príncipe and Togo.

1  
2  
3 1 The average prevalence in the entire African continent was 10.1%. The global CKD prevalence  
4  
5 2 was reported to be 13.4%<sup>176</sup>. In sub-Saharan Africa in Stanifer's meta-analysis, the prevalence of  
6  
7 3 CKD was 13.2%<sup>9</sup>, which is close to that reported in the same area in our review (14.02%). Among  
8  
9 4 the general population of economically developed countries, CKD has a 13.6% prevalence in the  
10  
11 5 USA<sup>177</sup>. In Europe, the reported prevalence is lower and more homogenous, being 8.9% in the  
12  
13 6 Netherlands, 6.8% in Italy, 5.2% in Portugal, 4.7% in Spain, and 3.3% in Norway<sup>178</sup>. CKD  
14  
15 7 prevalence in some Asian countries was higher than the estimates in the USA and in Europe, being  
16  
17 8 17.5% in Thailand<sup>179</sup>, 15% in India<sup>180</sup>, 13% in Japan<sup>181</sup>, 11.9% in Taiwan<sup>182</sup>, and 9.9% in China<sup>183</sup>.  
18  
19 9 Overall, the estimated prevalence of CKD at the general population level in African countries  
20  
21 10 appears to be comparable and possibly even higher than that reported in other continents. This may  
22  
23 11 be at least in part due to the low quality data for the prevalence of CKD in Africa related to poor  
24  
25 12 sampling techniques, unreliable kidney function measurements, and the different definitions used.  
26  
27  
28

29  
30 13 In our review, the prevalence of CKD in surveys based on hospitals or primary care centres  
31  
32 14 (36 %) is close to that in Swiss primary care centres (36%)<sup>184</sup>.  
33

34 15 Poverty-related factors such as infectious diseases secondary to poor sanitation, inadequate  
35  
36 16 supply of safe water, environmental pollutants and high concentrations of disease transmitting  
37  
38 17 vectors continue to play an important role in the development of CKD in low-income countries.  
39  
40 18 Although rates of diabetic nephropathy are rising, chronic glomerulonephritis and interstitial  
41  
42 19 nephritis are among the principal causes of CKD in many countries<sup>185</sup>.  
43  
44

45 20 In Africa, infectious diseases such as HIV, bilharziasis, malaria, hepatitis B and C represent  
46  
47 21 an almost unique cluster of risk factors responsible for CKD<sup>186</sup>. HIV/AIDS is pandemic in Africa,  
48  
49 22 with a prevalence ranging from 0.5% in Senegal<sup>187</sup> to 27.4% in Swaziland<sup>188</sup>. The global success in  
50  
51 23 bringing effective antiretroviral treatment (HAART) to HIV-infected patients in Africa has  
52  
53 24 determined the emergence of chronic medical illnesses such as HIV-related CKD<sup>189</sup>. Up to 50% of  
54  
55 25 kidney diseases in HIV-infected persons result from a wide array of non-HIV-associated  
56  
57 26 nephropathy (HIVAN) pathologies, ranging from glomerulonephritis to diabetic nephropathy<sup>190</sup>.  
58  
59  
60

1 We found that 5.6% of HIV patients complained of renal dysfunction. This figure is lower than that  
2 reported in economically developed countries such as France, USA, China, Spain, and Brazil<sup>191-195</sup>.  
3 CKD was higher among HIV patients not receiving HAART compared to those on HAART.  
4 Variation in the proportion of HIV patients affected by CKD depends on the heterogeneity in the  
5 definition used to determine renal dysfunction, the proportion of the study population on HAART,  
6 diverse ethnicities, the associated comorbidities, and the nutritional status of the study population.  
7 HIV patients are more prone to nutritional deficiencies due to mal-absorption, impaired oral intake,  
8 and the wasting syndrome. Increased availability of HAART has led to some improvement of the  
9 nutritional status of patients. However, for certain individuals, undernutrition and weight loss  
10 persist despite therapy. Malnutrition exacerbates side effects, alters drug pharmacokinetics, and  
11 impinges on adherence thereby limiting the beneficial effects of the therapy<sup>196</sup>. Furthermore,  
12 differences in HIV clades or strains in African patients<sup>197</sup> and genetic factor<sup>198</sup> may influence the  
13 replication capacities within the isolated renal reservoir and thus lead to a diversity in clinical  
14 presentations<sup>80</sup>.

15       Regarding systemic autoimmune diseases such as lupus, a study conducted among lupus  
16 patients from Senegal showed that almost three quarters (71.0%) the patients with this disease had  
17 evidence of renal involvement<sup>19</sup>. This isolated figure is higher than that reported in other  
18 countries<sup>199-201</sup>. More than one third (39%) patients with rheumatoid arthritis had CKD<sup>20</sup> which is  
19 higher than that reported from Taiwan<sup>202</sup>.

20       Even though there are no sufficient data to precisely reconstruct historical trends, the profile  
21 of CKD causes has changed during the last decades. Interstitial nephritis and glomerulonephritis  
22 were the main causes of CKD in North Africa<sup>203</sup> and CKD was principally caused by chronic  
23 glomerulonephritis and hypertension in East and Tropical Africa<sup>204,205</sup>. Today, the spectrum of  
24 causes of CKD in Africa is dominated by diabetes mellitus and hypertension<sup>206</sup>. We found that the  
25 prevalence of diabetic and hypertensive nephropathies as a cause of CKD (20% and 13.5%,  
26 respectively) exceeded that caused by chronic glomerulonephritis (13%).

1  
2  
3  
4  
5  
6  
7  
8  
9  
10  
11  
12  
13  
14  
15  
16  
17  
18  
19  
20  
21  
22  
23  
24  
25  
26  
27  
28  
29  
30  
31  
32  
33  
34  
35  
36  
37  
38  
39  
40  
41  
42  
43  
44  
45  
46  
47  
48  
49  
50  
51  
52  
53  
54  
55  
56  
57  
58  
59  
60

1 Our review has both strengths and limitations. The major strengths include a thorough  
2 systematic search of electronic databases and the inclusion of all comprehensive studies with a  
3 transparent assessment of CKD prevalence by two independent reviewers. The fact that our  
4 literature search was limited to PubMed and Medline OVID but did not include the African  
5 Index Medicus, like it was done by Stanifer in the meta-analysis of CKD in sub-Saharan Africa  
6 [8], is a limitation of our study. Because there was a huge discrepancy in the definitions used to  
7 identify CKD, the methods of creatinine measurement, urine protein assessment, and in the quality  
8 of the reporting, we decided to adopt an inclusive strategy. Our primary interest was to identify all  
9 studies conducted among different population groups in Africa providing information on CKD and  
10 to reconstruct a tentative scenario of the epidemiological dimension concerning disease in the entire  
11 African continent. Methodological limitations notwithstanding this review compiled estimates  
12 suggesting that the CKD burden in Africa is at least as concerning as that in economically-  
13 developed countries. The lack of a consistent definition of CKD makes it difficult to compare the  
14 burden of CKD across studies in various countries. Moreover, the failure to demonstrate chronicity  
15 when defining CKD is a common limitation of studies investigating CKD prevalence in Africa. It  
16 was reported that a single test in time has an extremely poor positive predictive value for  
17 confirmation of CKD compared to repeated testing 3 months later. Failure to repeat testing may  
18 lead to a significant overestimation of CKD prevalence and underestimation of the burden of CVD  
19 in CKD<sup>207</sup>. In addition, Observational studies are subject to bias and residual confounding which are  
20 difficult to account for and there are limitations due to the heterogeneity that arises from differences  
21 in age and sex distributions. These poor data quality reported in different studies is considered as a  
22 cumbersome problem limiting the accuracy in assessing the burden of CKD in Africa

23 In conclusion, CKD in Africa appears to be at least as common as in other continents and as  
24 such, it constitutes a true public health priority with major cost burden to healthcare systems  
25 worldwide. Targeted screening of high-risk groups (including those with hypertension, diabetes  
26 mellitus, HIV patients and persons with occupational exposures) should likely be instituted as the

1  
2  
3 1 first step in kidney disease prevention whenever and wherever affordable and feasible. Education to  
4  
5 2 increase awareness of CKD among healthcare workers and patients, and the promotion of healthy  
6  
7 3 life styles, should be engrained in preventive programs. The treatment of hypertension and diabetes  
8  
9 4 mellitus are of obvious relevance. Nurses and other health workers should be trained to manage  
10  
11 5 these conditions at the local level if we are to curb the incidence of CKD and to avert the added  
12  
13 6 burden of CKD complications to diabetes, hypertension, and infectious diseases, the deadly trio of  
14  
15 7 risk factors underlying the CKD epidemic in Africa.  
16  
17  
18  
19  
20  
21  
22  
23  
24  
25  
26  
27  
28  
29  
30  
31  
32  
33  
34  
35  
36  
37  
38  
39  
40  
41  
42  
43  
44  
45  
46  
47  
48  
49  
50  
51  
52  
53  
54  
55  
56  
57  
58  
59  
60

1  
2  
3  
4  
5  
6  
7  
8  
9  
10  
11  
12  
13  
14  
15  
16  
17  
18  
19  
20  
21  
22  
23  
24  
25  
26  
27  
28  
29  
30  
31  
32  
33  
34  
35  
36  
37  
38  
39  
40  
41  
42  
43  
44  
45  
46  
47  
48  
49  
50  
51  
52  
53  
54  
55  
56  
57  
58  
59  
60

### 1 FUNDING STATEMENT:

2 Samar Abd ElHafeez was granted an European Renal Association-European Dialysis and  
3 Transplantation Association (ERA-EDTA) fellowship at CNR-IFC/IBIM, Clinical Epidemiology  
4 and Physiopathology of Renal Disease and Hypertension of Reggio Calabria, Italy, and this work  
5 was completed during her training.

6 This article was written by in the framework of the Advisory Program of the ERA-EDTA YNP  
7 (Young Nephrologists' Platform) which is an official body of the ERA-EDTA (European Renal  
8 Association - European Dialysis and Transplant Association).

9 Dr. Samar Abd ElHafeez was an advisee of ERA-EDTA YNP Adviser-Advisee Program (Adviser  
10 Dr. Davide Bolignano)."

11  
12 **COMPETING OF INTERESTS:** Not declared.

### 14 AUTHORS' CONTRIBUTIONS:

15 SA, DB, and CZ: conceptualized and designed the study.

16 SA, GD, and ED: participated in revising the articles included in the review and retrieved the  
17 necessary information.

18 DB and GT: supervised the data capture and analysis.

19 SA, DB, and GT: analysed and interpreted the data.

20 SA, DB, and CZ: drafted and critically revised the manuscript.

21 All of the authors read and approved the final manuscript.

22  
23 **DATA SHARING STATEMENT:** No additional data are available.

### 25 ACKNOWLEDGEMENTS

26 We would like to thank the following professors and physicians for their help in providing the  
27 articles we evaluated in our review:

28 Prof. Olutayo Alebiosu, Prof.Ahmed Donia, Prof. Rashad Barsoum, Prof. Carel IJsselmuiden,  
29 Prof. Laurent Forcard, Prof. Anatole Laleye, Prof. Nestor Pakasa, Prof. Imaobong Etuk, Prof.  
30 Ifeoma Ulasi, Prof. Abubakr Abefe Sanusi, Prof. Gbenga Ayodele, Prof. Raida S. Yahya, Prof.  
31 Mohammed Benghanem Gharbi, Prof. Fatma Ben Moussa, Dr.Ikechi Okpechi, Dr. Alaya Akram,  
32 Dr.Adebowale Ademola,Dr. Oluyombo Rotimi,, Dr.K S Nayak, Dr. Guy Neild, Dr.Rasheed  
33 Gbadegesin, Dr.Sidy Mohamed Seck, Dr. Amr El-Husseini Mohamed, Dr.Fasika M. Tedla, Prof.  
34 Adewale Akinsola, Prof. Olanrewaju Adedoyin, Dr.Halle Marie Patrice, Dr. Emmanuel Agaba,  
35 Prof. Miriam Adhikari, Dr. B.T Bello, Dr.Zidane Djelloul

**Table 1: Characteristics of the study population included in the analysis**

| Study population         | Number of the studies | Study characteristics                                                                                             |
|--------------------------|-----------------------|-------------------------------------------------------------------------------------------------------------------|
| General population       | 29                    | N=30169, age ranging from 12 to 95 years; 48% males                                                               |
| Diabetic patients        | 18                    | N=9082, age ranging from 14 to 90 years; 43% males                                                                |
| Hypertensive patients    | 9                     | N=4123, age ranging from 19 to 90 years; 43% males                                                                |
| HIV patients             | 42                    | N= 67432, age ranging from 13 to 74 years; 36% males                                                              |
| Occupational group       | 2                     | N= 153, age ranging from 22 to 59 years; one study only enrolled females and the other principally enrolled males |
| Family practice patients | 7                     | N= 3250, age ranging from 20-74 years, 44% males                                                                  |
| Lupus patients           | 1                     | N= 43, age ranging from 16 to 55 years, 7% males                                                                  |
| Rheumatoid arthritis     | 1                     | N=233, age ranging from 40-70 years, 17.2% males                                                                  |
| Sickle cell anemia       | 1                     | N=194, age ranging from 12-40 years, 43.3% males                                                                  |
| CKD patients             | 42                    | N =32695, age ranging from 12 to 90 years, 58% males                                                              |

Table 2: Studies on CKD among the general population

| Study ID                    | Year, Country, Region   | Location                                                                 | N    | Population Characteristic                                                                                                                                                                                        | Definition of CKD                | Method of outcome assessment                                                                            | Type of creatinine assay      | Proteinuria                                   | CKD prevalence                                                                     | Quality assessment |
|-----------------------------|-------------------------|--------------------------------------------------------------------------|------|------------------------------------------------------------------------------------------------------------------------------------------------------------------------------------------------------------------|----------------------------------|---------------------------------------------------------------------------------------------------------|-------------------------------|-----------------------------------------------|------------------------------------------------------------------------------------|--------------------|
| Abdelsatir S <sup>169</sup> | 2013 Sudan North-east   | All village inhabitants                                                  | 389  | Age (years): 41 ± 15<br>Male gender: 16.2%<br>Hypertension: 39.6%,<br>DM: 17%<br>BMI category: ( kg/m <sup>2</sup> )<br><18: 6.2%,<br>18-24.9: 65.8%,<br>25-29.9: 20.2 %,<br>≥30: 7.8%                           | Not identified, personal history | Personal history                                                                                        | Not mentioned                 | Not measured                                  | <b>Total prevalence (as reported): 6.40%</b>                                       | Low                |
| Fatiu A <sup>73</sup>       | 2011 Nigeria West       | Market population                                                        | 286  | Age (years): 49.5 ± 5.7<br>Male gender: 9.8%<br>Hypertension: 37.7%<br>BMI (kg/m <sup>2</sup> ): 26.76 ± 5.28<br><20 kg/m <sup>2</sup> : 7.4%<br>20-25 kg/m <sup>2</sup> : 33.4%<br>> 25 kg/m <sup>2</sup> : 59% | Proteinuria ≥ +1                 | Midstream urine sample was tested by urinary strip                                                      | Not measured                  | <b>29.70%</b>                                 | <b>Total prevalence ( based on proteinuria prevalence): 29.7%</b>                  | Medium             |
| Traore M <sup>74</sup>      | 1998 Mali West          | All Household population of the villages                                 | 1098 | Age (years): 30±12<br>Male gender: 52%                                                                                                                                                                           | Proteinuria ≥ +1                 | Microhaematuria and proteinuria by urinary strip                                                        | Not measured                  | 40.80%                                        | <b>Total prevalence ( based on proteinuria prevalence): 40.80%</b>                 | Medium             |
| Matsha T <sup>12</sup>      | 2013 South Africa South | Bellville town inhabitants                                               | 1202 | Age (years): 52.9 ± 14.8<br>Male gender: 24.7%<br>SBP: 125±20<br>DBP: 76 ± 13<br>DM: 26.4%<br>BMI: 29.9 ± 7.2                                                                                                    | eGFR < 60 ml/min                 | 4 variables: MDRD, CG, CKD-EPI                                                                          | Standardized creatinine assay | Not measured                                  | <b>Prevalence of stages 3-5: 7.4% (based on CKD-EPI with ethnicity correction)</b> | Medium             |
| Seck SM <sup>97</sup>       | 2014 Senegal West       | Two stage cluster sampling of Urban and rural inhabitants of Saint-Louis | 1037 | Age (years): 48.0 ± 16.9<br>Male gender: 40%<br>Hypertension: 39.1%<br>DM: 12.7%<br>BMI: 26.3 ± 6.8 kg/m <sup>2</sup>                                                                                            | KDOQI                            | Albuminuria by urinary strips. Positive samples were confirmed by 24-hour albuminuria, eGFR by 186 MDRD | Kinetic Jaffe                 | 5.3% albuminuria >1 g/l                       | <b>Total prevalence: 6.1%</b>                                                      | High               |
| Pruijm M <sup>116</sup>     | 2008 Seychelles, East   | a random sex-stratified and age-stratified sample inhabitants            | 1255 | Age (years): range, 25-64<br>Male gender: 46%                                                                                                                                                                    | KDOQI                            | Quantitative microalbuminuria by ACR, eGFR using MDRD                                                   | Not mentioned                 | 11.4% microalbuminuria, 0.7% macroalbuminuria | <b>Total prevalence : 15.3%</b><br>Prevalence of stages 3-4 CKD 3.2%.              | High               |



|                           |                         |                                              |      |                                                                                                                                                                                                                                                                  |                                                                                               |                                                                                                            |  |                                                 |                                                                                                                                                                                                                                  |        |
|---------------------------|-------------------------|----------------------------------------------|------|------------------------------------------------------------------------------------------------------------------------------------------------------------------------------------------------------------------------------------------------------------------|-----------------------------------------------------------------------------------------------|------------------------------------------------------------------------------------------------------------|--|-------------------------------------------------|----------------------------------------------------------------------------------------------------------------------------------------------------------------------------------------------------------------------------------|--------|
|                           |                         | of Seychelle                                 |      |                                                                                                                                                                                                                                                                  |                                                                                               |                                                                                                            |  |                                                 |                                                                                                                                                                                                                                  |        |
| Sumaili EK <sup>98</sup>  | 2009 Congo Central      | Multistage sampling of residents of Kinshasa | 500  | Age (years): 38.6 ± 14.4<br>Male gender: 41%<br>Hypertension: 27.6%<br>DM: 11.7%<br>BMI category:<br>25–29.9 kg/m <sup>2</sup> : 20.3%<br>≥30 kg/m <sup>2</sup> : 14.9%                                                                                          | KDOQI                                                                                         | Proteinuria by urinary strip and 24-hour proteinuria, eGFR by CG and 175MDRD                               |  | 18% proteinuria by dipstick<br>5% (≥300 mg/day) | <b>Total prevalence:</b><br>MDRD 12.4%<br>CG 19%<br><br><b>Prevalence by stage (MDRD)</b><br>Stage 1: 2%<br>Stage 2: 2.4%<br>Stage 3: 7.8%<br>Stage 4: 0.2%<br>Stage 5: 0.2%                                                     | High   |
| Matsha T <sup>159</sup>   | 2014 South Africa South | All residents of Cape-Town                   | 320  | Age (years): mean, 56.4 (55.1–57.6, 95% CI)<br>Male gender: 22%<br>SBP: 124.7 (122.8–126.7, 95% CI) mmHg<br>DBP: 75.5 (74.2–76.7, 95% CI) mmHg<br>BMI: 31.9 (31.2–32.7, 95% CI) kg/m <sup>2</sup><br>Mean eGFR at baseline: 68.6±16.7 ml/min/1.73 m <sup>2</sup> | eGFR < 60 ml/min/1.73 m <sup>2</sup>                                                          | eGFR- 186MDRD (4 variables)                                                                                |  | Not measured                                    | <b>Total Prevalence 28.9% by categories</b><br>eGFR>90 ml/min/1.73m <sup>2</sup> :9.4%<br>eGFR60-90 ml/min/1.73m <sup>2</sup> : 58.7%<br>eGFR30-60 ml/min/1.73m <sup>2</sup> : 28.1%<br>eGFR<30 ml/min/1.73m <sup>2</sup> : 0.9% | Medium |
| Sumaili EK <sup>75</sup>  | 2008 Congo Central      | All Residents of Kinshasa                    | 3018 | Age (years): 44.3 ±15.3<br>Male gender: 59%<br>Hypertension: 18%<br>DM: 4%                                                                                                                                                                                       | Proteinuria ≥ +1                                                                              | Proteinuria by urinary strip                                                                               |  | 17.1%                                           | <b>Total prevalence ( based on proteinuria prevalence): 17.1%</b>                                                                                                                                                                | High   |
| Egbi OG <sup>76</sup>     | 2014 Nigeria West       | All Civil servants in Bayelsa                | 179  | Age (years): 45.2 ± 10.3<br>Male gender: 53.1%<br>SBP:128.5± 17.5 mmHg<br>DBP: 81.8 ±13.2 mmHg                                                                                                                                                                   | eGFR <60 ml/min/1.73 m <sup>2</sup> and/or presence of proteinuria of at least +1 on dipstick | Proteinuria by urinary strip, eGFR by CG equation standardized for body surface area (BSA)                 |  | 5.6%                                            | <b>Total prevalence: 7.8%</b><br><br><b>Prevalence by stage</b><br>Stage 1:3.4%<br>Stage 2: 2.2%<br>Stage 3: 2.2%<br>None in stage 4 or 5                                                                                        | Low    |
| Oluyombo R <sup>105</sup> | 2013 Nigeria West       | Multistage sampling of Households of Ilie    | 454  | Age (years): 45.8 ± 19.0<br>Male gender: 43%<br>Hypertension: 20.4%<br>DM: 0.6%                                                                                                                                                                                  | eGFR <60 ml/min and/or macroalbuminuria (ACR>300 mg/g or dipstick proteinuria)                | Proteinuria by urinary strip, negative cases were estimated for albumin creatinine ratio, eGFR by 186 MDRD |  | Macroalbuminuria in 8.9%                        | <b>Total prevalence: 18.8%</b><br><br><b>Prevalence by stage</b><br>Stage 1: 2.4%<br>Stage 2: 4.1%<br>Stage 3: 11.8%<br>Stage 4: 0.5%                                                                                            | High   |
| Eastwood J <sup>13</sup>  | 2010 Ghana, West        | Inhabitants of 12 villages                   | 944  | Age (years): 54.7±11.2<br>Male gender: 38%<br>SBP:125.5±26.0 mmHg                                                                                                                                                                                                | KDOQI                                                                                         | 175MDRD, CG, CKD-EPI                                                                                       |  | Kinetic Jaffe and calibrated IDMS               | <b>Total Prevalence ( based on CKD-EPI and ethnicity correction) :</b>                                                                                                                                                           | High   |

|                              |                          |                                                                                                                               |       |                                                                                                                                 |                                                                                                                                                                                                        |                                                                        |                           |                                             |                                                                                                                                                               |        |
|------------------------------|--------------------------|-------------------------------------------------------------------------------------------------------------------------------|-------|---------------------------------------------------------------------------------------------------------------------------------|--------------------------------------------------------------------------------------------------------------------------------------------------------------------------------------------------------|------------------------------------------------------------------------|---------------------------|---------------------------------------------|---------------------------------------------------------------------------------------------------------------------------------------------------------------|--------|
|                              |                          |                                                                                                                               |       | DBP: 74.4 ± 13.6 mmHg<br>DM: 4%<br>BMI: 21.1 ± 4.2 kg/m <sup>2</sup>                                                            |                                                                                                                                                                                                        |                                                                        |                           |                                             | 1.7%<br>MDRD: 1.6% (7.2 %<br>without ethnicity<br>correction;<br>CKD-EPI 1.7% (4.7%<br>without ethnicity<br>correction),<br>CG 21.0%.                         |        |
| Gouda Z <sup>117</sup>       | 2011<br>Egypt<br>North   | Community<br>based in<br>Al-<br>Buhayrah<br>governorate                                                                       | 417   | Age (years): 39.12 ±<br>14.29<br>Male gender: 43.2%<br>Hypertension: 25.20%<br>DM: 10.6%<br>BMI: 29.96 ± 6.18 kg/m <sup>2</sup> | eGFR <60 ml/min/1.73 m <sup>2</sup>                                                                                                                                                                    | Quantitative assessment of urinary<br>ACR, eGFR by 175 MDRD            | IDMS-calibrated           | 10.6%<br>microalbuminuria                   | <b>Total prevalence 18%</b>                                                                                                                                   | Medium |
| Ayodele<br>OE <sup>77</sup>  | 2011<br>Nigeria<br>West  | People at a<br>major trade<br>center, the<br>public<br>servant<br>secretariat<br>and the<br>state<br>broadcastin<br>g station | 586   | Age (years): 42.4±11.2<br>Male gender: 61.4 %<br>Hypertension: 16.4%<br>DM: 3.8%<br>BMI: 25.9±5.4 kg/m <sup>2</sup>             | proteinuria ≥+1                                                                                                                                                                                        | Proteinuria by urinary strip                                           | Not assessed              | 2.50%                                       | <b>Total prevalence ( based<br/>on proteinuria ): 2.50%</b>                                                                                                   | Medium |
| Abu-Aisha<br>H <sup>78</sup> | 2009<br>Sudan<br>East    | Pilot survey<br>of police<br>housing<br>complex                                                                               | 273   | Age (years): 34.3±12<br>Male gender: 49.1%<br>Hypertension: 27%<br>DM: 5.1%                                                     | eGFR <60 ml/min/1.73 m <sup>2</sup><br>and or proteinuria                                                                                                                                              | Proteinuria by urinary strip,<br>175MDRD, CG                           | Not mentioned             | 5.30%                                       | <b>Total prevalence<br/>(MDRD) 7.7%<br/>[11% by CG]</b><br><br><b>Prevalence by stage</b><br>Stage 1 or 2: 4.7%<br>Stage 3: 2.6%<br>Stage 4: 0<br>Stage: 0.4% | Medium |
| Gharbi<br>M <sup>106</sup>   | 2012<br>Morocco<br>North | Stratified<br>random<br>sampling of<br>population<br>in two<br>towns                                                          | 10524 | Age (years): range, 25-<br>70<br>Male gender: (50%),<br>Hypertension : 16.7%                                                    | eGFR < 60 ml/ min/1.73<br>m <sup>2</sup> or macroalbuminuria or<br>dipstick abnormalities<br>(proteinuria<br>≥ ++ 1 or haematuria: ≥<br>++1) or diabetes type 1<br>associated with<br>microalbuminuria | 175 MDRD, microalbuminuria and<br>proteinuria by urinary strip and ACR | Kinetic Jaffe and<br>IDMS | microalbuminuria<br>(30-299 mg/l):<br>5.26% | <b>Total prevalence 2.90%</b>                                                                                                                                 | High   |
| CU O <sup>153</sup>          | 2014<br>Nigeria<br>West  | All<br>attendees to<br>lectures of<br>the<br>Ebreime<br>Foundation<br>for the<br>elderly,                                     | 170   | Age (years): 68.1±7.7<br>Male gender: 67.1%                                                                                     | eGFR<60ml/min/1.73 m <sup>2</sup>                                                                                                                                                                      | 175 MDRD                                                               | IDMS calibrated           |                                             | <b>Total prevalence:<br/>43.50%,<br/>(all cases were at stage<br/>3)</b>                                                                                      | Low    |

|                             |                            |                                                                                      |      |                                                                                                                                                                                     |                                                                                              |                                                               |                        |                       |                                                                                                                                               |        |
|-----------------------------|----------------------------|--------------------------------------------------------------------------------------|------|-------------------------------------------------------------------------------------------------------------------------------------------------------------------------------------|----------------------------------------------------------------------------------------------|---------------------------------------------------------------|------------------------|-----------------------|-----------------------------------------------------------------------------------------------------------------------------------------------|--------|
| Booyesen H <sup>155</sup>   | 2016 South Africa South    | participants from families of black African descent                                  | 1221 | Age (years):44.1±18.4<br>Male gender:34.9%<br>BMI (kg/m <sup>2</sup> ):29.5±8.0<br>Hypertension: 45%<br>Diabetes mellitus:25.2%                                                     | eGFR<60ml/min/1.73 m <sup>2</sup>                                                            | eGFR by CG, 4 variables MDRD, CKD-EPI                         | IDMS calibrated        | Not measured          | <b>Total prevalence:6.3%</b>                                                                                                                  | High   |
| Kalyesubula R <sup>90</sup> | 2017 Uganda East           | Community based survey among all households of Wakiso district                       | 955  | Age (years):31 (IQR: 24–42)<br>Male gender: 33%<br>BMI(kg/m <sup>2</sup> ) categories:<br>Underweight:5.5%<br>Normal: 56.9%<br>Overweight:24.2%<br>obese : 13.4%<br>Diabetics: 5.9% | KDOQI                                                                                        | Proteinuria by dipstick and eGFR by CG, MDRD, and CKD-EPI     | Kinetic Jaffe          | 0.3%                  | <b>Total prevalence: 15.2%</b><br><b>Prevalence by stage:</b><br>Stage 1: 6.2%<br>Stage 2:12.7%<br>Stage 3:2.4%<br>Stage 4:0<br>Stage 5: 0.1% | High   |
| Kaze F <sup>91</sup>        | 2015 Cameroon Central-West | Population of the Littoral region                                                    | 500  | Age (years): 45.3 ± 13.2<br>Male gender: 53.4%<br>BMI (kg/m <sup>2</sup> ): 27.1 ±5.3<br>Diabetes mellitus: 2.8%<br>Hypertension: 12.2%                                             | any albuminuria and/or eGFR <60 ml/min/1.73m <sup>2</sup>                                    | Albuminuria by dipstick and eGFR by CG, MDRD, CKD-EPI         | Kinetic Jaffe and IDMS | 7.2%                  | <b>Total prevalence (CKD-EPI): 10%</b><br>[14.2% by CG, 11%MDRD]                                                                              | High   |
| Kaze F <sup>112</sup>       | 2015 Cameroon Central-West | Population of the Western Region                                                     | 439  | Age (years):47 ± 16.1<br>Male gender: 42.1%<br>Hypertension: 10.7%<br>Diabetes mellitus: 5.9%                                                                                       | Albuminuria and/or eGFR <60 ml/min confirmed 3 months later                                  | Albuminuria by dipstick and ACR and eGFR by CG, MDRD, CKD-EPI | Kinetic Jaffe and IDMS | 12.1% had albuminuria | <b>Total prevalence (CKD-EPI): 27.6%</b><br>[38.5% by CG, 27.3%MDRD]                                                                          | High   |
| Laurence E <sup>130</sup>   | 2016 South Africa South    | Teachers from public schools in the urban area of the Metro South Education District | 489  | Age (years): 46.3 ± 8.5<br>Male gender: 30%<br>BMI(kg/m <sup>2</sup> ):males: 29.1 ±4.8, females: 32.4.1 ±7.<br>Hypertension: 48.5%<br>Diabetes mellitus: 10.1%                     | Proteinuria ≥0.30 mg/mg or eGFR <60 ml/min/1.73 m <sup>2</sup>                               | Proteinuria by PCR and eGFR using MDRD                        | Kinetic Jaffe          | Not mentioned         | <b>Total prevalence: 10.4%</b>                                                                                                                | Medium |
| Lunyera J <sup>92</sup>     | 2016 Uganda East           | Urban residents of Kampala                                                           | 141  | Age (years): 64% in age group of 18-39<br>Male gender: 43%<br>BMI( kg/m <sup>2</sup> ): 25.9 (IQR 22.7–30.7)<br>Hypertension: 38%<br>Impaired fasting blood glucose: 13%            | Proteinuria as urine protein of ≥1+ on dipstick in the absence of hematuria and leukocyturia | Proteinuria by dipstick                                       | Not measured           | 13%                   | <b>Total prevalence(based on proteinuria): 13%</b>                                                                                            | Low    |
| Mogueo A <sup>131</sup>     | 2015 South Africa South    | Household residents of Bellville                                                     | 902  | Age (years): 55±15<br>Male gender: 23%<br>BMI( kg/m <sup>2</sup> ): 29.9 ±7.2<br>Hypertension: 49.8%<br>Diabetes mellitus: 27.9%                                                    | eGFR <60 ml/min/1.73 m <sup>2</sup> , or any nephropathy                                     | Albuminuria by ACR and eGFR by MDRD and CKD-EPI               | Kinetic Jaffe          | 2.3%                  | <b>Total prevalence( CKD-EPI): 21.7%</b><br>[ prevalence by MDRD: 29.7%]                                                                      | Medium |
| Peck R <sup>148</sup>       | 2016, Tanzania             | Stratified multistage                                                                | 1043 | Age (years):35.5 ± 15.3<br>Male gender: 45.7%                                                                                                                                       | eGFR<60 ml/min/1.73 m <sup>2</sup>                                                           | eGFR by MDRD and CKD-EPI                                      | Kinetic Jaffe          | Not measured          | <b>Total prevalence )CKD-EPI): 7%</b>                                                                                                         | High   |

1  
2  
3  
4  
5  
6  
7  
8  
9  
10  
11  
12  
13  
14  
15  
16  
17  
18  
19  
20  
21  
22  
23  
24  
25  
26  
27  
28  
29  
30  
31  
32  
33  
34  
35  
36  
37  
38  
39  
40  
41  
42  
43  
44  
45  
46  
47  
48  
49

|                           |                      |                                                               |     |                                                                                                                                                                 |                                                                                                                                 |                                                                     |               |               |                                 |      |
|---------------------------|----------------------|---------------------------------------------------------------|-----|-----------------------------------------------------------------------------------------------------------------------------------------------------------------|---------------------------------------------------------------------------------------------------------------------------------|---------------------------------------------------------------------|---------------|---------------|---------------------------------|------|
|                           | , East               | sampling of adult population in Mwanza city, Geita and Kahama |     | BMI( kg/m <sup>2</sup> ) categories:<br>Underweight: 10.5%<br>Normal: 71%<br>Overweight: 11.8%<br>Obese :6.6%<br>Diabetes mellitus: 0.9%<br>Hypertension: 17.3% |                                                                                                                                 |                                                                     |               |               |                                 |      |
| Stanifer J <sup>132</sup> | 2016, Tanzania, East | stratified, cluster-designed cross-sectional household        | 481 | Age (years): 46.9 ± 15.1<br>Male gender: 74.4%<br>Diabetes mellitus: 9.4%<br>Hypertension: 31%                                                                  | presence of albuminuria (≥30 mg/dl; confirmed by repeat assessment) and/or a reduction in eGFR ≤60 ml/min/1.73 m <sup>2</sup>   | Quantitative assessment of albuminuria and eGFR by MDRD and CKD-EPI | IDMS          | 6.8%          | <b>Total prevalence : 11.9%</b> | High |
| Stanifer J <sup>133</sup> | 2015, Tanzania, East | Randomly selected adults                                      | 481 | Age (years): 45 (IQR 35–59)<br>Male gender: 25.6%<br>Diabetes mellitus: 12.7%<br>Hypertension: 28%                                                              | eGFR<60 ml/min/1.73m <sup>2</sup> and/or persistent albuminuria                                                                 | Quantitative assessment of albuminuria and eGFR by MDRD             | IDMS          | Not mentioned | <b>Total prevalence: 7%</b>     | High |
| Stanfier J <sup>134</sup> | 2016, Tanzania, East | stratified, cluster-designed cross-sectional survey           | 606 | Age (years): 45.5 ±15.5<br>Male gender: 24.6%<br>Diabetes mellitus: 10.1%<br>Hypertension: 23.7%                                                                | the presence of albuminuria (≥30mg/dl confirmed by repeat assessment) and/or a once-measured eGFR ≤60 ml/min/1.73m <sup>2</sup> | Quantitative assessment of albuminuria and eGFR by MDRD             | IDMS          | Not mentioned | <b>Total prevalence: 8%</b>     | High |
| Wachukwu C <sup>93</sup>  | 2015, Nigeria, West  | Adult volunteers in a university                              | 259 | Age (years):28.3±9.7<br>Male gender: 52.1%<br>SBP(mmHg):117.3±15.5<br>DBP(mmHg): 75.7±11.7                                                                      | eGFR<60 ml/min/1.73m <sup>2</sup>                                                                                               | Proteinuria by dipstick and eGFR by CG                              | Not mentioned | 12.4%         | <b>Total prevalence: 1.9%</b>   | Low  |

DM: diabetes mellitus, BMI: body mass index, SBP: systolic blood pressure, DBP: diastolic blood pressure, IDMS: Isotope dilution mass spectrometry, MDRD: Modification of Diet in Renal Disease, CG: Cockcroft Gault, CKD-EPI: Chronic Kidney Disease Epidemiology Collaboration, IQR: inter-quartile range, KDOQI: Kidney Disease Outcome Quality Initiative

Table 3: Studies on CKD among HIV patients

1  
2  
3  
4  
5  
6  
7  
8  
9  
10  
11  
12  
13  
14  
15  
16  
17  
18  
19  
20  
21  
22  
23  
24  
25  
26  
27  
28  
29  
30  
31  
32  
33  
34  
35  
36  
37  
38  
39  
40  
41  
42  
43  
44  
45  
46  
47  
48  
49

| Author                 | Year, Country, Region                  | Location                             | N    | Study group                                 | Population characteristics                                                                                                                                      | Definition of CKD                                                                                                                                       | Method of outcome assessment | Creatinine assay | Proteinuria  | CKD prevalence                                                                                                                | Quality assessment |
|------------------------|----------------------------------------|--------------------------------------|------|---------------------------------------------|-----------------------------------------------------------------------------------------------------------------------------------------------------------------|---------------------------------------------------------------------------------------------------------------------------------------------------------|------------------------------|------------------|--------------|-------------------------------------------------------------------------------------------------------------------------------|--------------------|
| Wkba O <sup>142</sup>  | 2013, Ghana, West                      | ART clinic at the regional hospital  | 442  | HIV (276) HAART-naïve patients 166 on HAART | Age (years): HAART-naïve (33.42 ± 0.88), On HAART (36.91 ± 0.77)<br>Male gender: HAART-naïve (28.3%), On                                                        | eGFR < 60 mL/min/1.73 m <sup>2</sup> for > 3months                                                                                                      | CG, 186 MDRD, CKD-EPI        | Kinetic Jaffe    | Not measured | <b>Total prevalence (CKD-EPI): 10.2%</b><br>HAART naïve: 8.7% CG, 9.1% MDRD, <b>8.7%</b><br><b>CKD-EPI</b><br>On HAART: 14.5% | Low                |
| Stöhr W <sup>143</sup> | 2011, Uganda, Zimbabwe, East and South | Three centers in Uganda and Zimbabwe | 3316 | HIV-infected patients initiating ART        | Age (years): 36.8 (32-42.2)<br>Male gender: 35%<br>SBP: median:110 (IQR:100-120) mmHg<br>DBP: median:70 (60-80) mmHg<br>BMI: 21.1 (19.1–23.6) kg/m <sup>2</sup> | eGFR<60 ml/min/1.73 m <sup>2</sup> on ≥ 2 consecutive visits 80 days apart or confirmed 25% decrease if eGFR <60 ml/min/1.73 m <sup>2</sup> at baseline | CG                           | Kinetic Jaffe    | Not measured | <b>Total prevalence : 7.2%</b>                                                                                                | Medium             |
| Stöhr W <sup>144</sup> | 2008, Uganda, Zimbabwe, Uganda and     | Three centers in Uganda and          | 3316 | HIV-infected patients on ART                | Age (years): 36.8 (32-42.2)<br>Male gender: 35%                                                                                                                 | eGFR<60 ml/min 1.73 m <sup>2</sup> on ≥ 2 consecutive                                                                                                   | 186 MDRD, CG                 | Kinetic Jaffe    | Not measured | <b>Total prevalence ( MDRD):3.1%</b> , CG 7.4%                                                                                | Medium             |

1  
2  
3  
4  
5  
6  
7  
8  
9  
10  
11  
12  
13  
14  
15  
16  
17  
18  
19  
20  
21  
22  
23  
24  
25  
26  
27  
28  
29  
30  
31  
32  
33  
34  
35  
36  
37  
38  
39  
40  
41  
42  
43  
44  
45  
46  
47  
48  
49

|                             |                     |                        |     |                       |                                                                                                                                                                                                                             |                                                                                                       |                                           |               |                        |       |                                                                                                                                                                               |        |
|-----------------------------|---------------------|------------------------|-----|-----------------------|-----------------------------------------------------------------------------------------------------------------------------------------------------------------------------------------------------------------------------|-------------------------------------------------------------------------------------------------------|-------------------------------------------|---------------|------------------------|-------|-------------------------------------------------------------------------------------------------------------------------------------------------------------------------------|--------|
|                             | East and South      | Zimbabwe               |     |                       | SBP: median:110 (IQR:100-120) mmHg<br>DBP: median:70 (60-80) mmHg<br>BMI categories:<br><18.5 kg/m <sup>2</sup> : 18%<br>18.5- <25 kg/m <sup>2</sup> : 66%<br>25-<30 kg/m <sup>2</sup> : 12%<br>≥ 30 kg/m <sup>2</sup> : 4% | occasions >80 days apart or confirmed 25% decrease if eGFR <60 ml/min/1.73 m <sup>2</sup> at baseline |                                           |               |                        |       |                                                                                                                                                                               |        |
|                             |                     | Outpatients HIV clinic |     |                       | Age (years): 40.1 (33-46.5) Male gender:29.7%<br>Hypertension: 2.7%<br>DM: 2%<br>BMI: median: 21.8 (19.3-24.2) kg/m <sup>2</sup>                                                                                            |                                                                                                       | Proteinuria by urinary strip, CG, 186MDRD | Not mentioned |                        | 6.10% | <b>Total prevalence (MDRD): 45.7%</b><br>GG: 46.5%<br><b>Prevalence by Stages ( using MDRD)</b><br>Stage 1: 30.2%<br>Stage 2:13.5%<br>Stage 3: 2%<br>Stage 4 & 5: no patients | Medium |
| Cailhol J <sup>79</sup>     | 2011, Burundi, East |                        | 300 | HIV-infected patients |                                                                                                                                                                                                                             | KDOQI                                                                                                 |                                           |               |                        |       |                                                                                                                                                                               |        |
| Masimango M1 <sup>107</sup> | 2014, Congo,        | Outpatient HIV clinic  | 235 | HIV-infected patients | Age (years): 40.0 ± 10.7                                                                                                                                                                                                    | Proteinuria ≥ +1 by urinary strip or                                                                  | Proteinuria by urinary                    | Not measured  | Proteinuria ≥+1: 41.3% |       | <b>Total prevalence ( based on</b>                                                                                                                                            | Low    |

1  
2  
3  
4  
5  
6  
7  
8  
9  
10  
11  
12  
13  
14  
15  
16  
17  
18  
19  
20  
21  
22  
23  
24  
25  
26  
27  
28  
29  
30  
31  
32  
33  
34  
35  
36  
37  
38  
39  
40  
41  
42  
43  
44  
45  
46  
47  
48  
49

|                         |                                        |                                                |      |  |                                                                                                                                                                                                                       |                                                                                                                                                            |                                      |               |              |                              |                                                                  |     |
|-------------------------|----------------------------------------|------------------------------------------------|------|--|-----------------------------------------------------------------------------------------------------------------------------------------------------------------------------------------------------------------------|------------------------------------------------------------------------------------------------------------------------------------------------------------|--------------------------------------|---------------|--------------|------------------------------|------------------------------------------------------------------|-----|
|                         | Central                                |                                                |      |  | Male gender: 27.8%<br>Hypertension: 46.8%<br>DM: 1.7%<br>BMI: 22.3 ± 3.8 kg/m <sup>2</sup>                                                                                                                            | albuminuria ≥30 mg/dl                                                                                                                                      | strip and ACR                        |               |              | <b>proteinuria): 41.3 %</b>  |                                                                  |     |
|                         |                                        | Three centres in Uganda and Zimbabwe           |      |  | age(years): 36.8 (IQR: 32.0–42.2)<br>male gender: 35%<br>SBP: median:110 (IQR: 100-120) mmHg<br>DBP: median:70 (IQR: 60-80) mmHg<br>HIV-infected, ART-naïve adults with CD4+ cell counts of<200 cells/mm <sup>3</sup> | eGFR<60 ml/min 1.73 m <sup>2</sup> on ≥2 consecutive occasions >80 days apart or confirmed 25% decrease if eGFR <60 ml/min/1.73 m <sup>2</sup> at baseline |                                      | Kinetic Jaffe |              | <b>Total prevalence : 7%</b> | Medium                                                           |     |
| Reid A <sup>145</sup>   | 2008, Uganda, Zimbabwe, East and South |                                                | 3316 |  |                                                                                                                                                                                                                       |                                                                                                                                                            | CG                                   |               | Not measured |                              |                                                                  |     |
|                         |                                        | HIV outpatient clinic at Johannesburg Hospital |      |  | Age (years): 37 (range 16–70 years)<br>Male gender: 38%<br>DM: 4.6% among patients                                                                                                                                    | Proteinuria ≥ +1 by urinary strip or albuminuria ≥30 mg/dl                                                                                                 | Proteinuria by urinary strip and PCR |               | Not measured | 43.7% had proteinuria        | <b>Total prevalence (based on proteinuria prevalence): 43.7%</b> | Low |
| Fabian J <sup>108</sup> | 2009, South Africa, South              |                                                | 578  |  |                                                                                                                                                                                                                       |                                                                                                                                                            |                                      |               |              |                              |                                                                  |     |

1  
2  
3  
4  
5  
6  
7  
8  
9  
10  
11  
12  
13  
14  
15  
16  
17  
18  
19  
20  
21  
22  
23  
24  
25  
26  
27  
28  
29  
30  
31  
32  
33  
34  
35  
36  
37  
38  
39  
40  
41  
42  
43  
44  
45  
46  
47  
48  
49

|                        |                      |                                                                                         |      |                                                                          |                                                                                                               |                                                                               |                                                          |                        |              |                                                                                                                                  |        |
|------------------------|----------------------|-----------------------------------------------------------------------------------------|------|--------------------------------------------------------------------------|---------------------------------------------------------------------------------------------------------------|-------------------------------------------------------------------------------|----------------------------------------------------------|------------------------|--------------|----------------------------------------------------------------------------------------------------------------------------------|--------|
|                        |                      |                                                                                         |      |                                                                          | group with microalbuminuria                                                                                   |                                                                               |                                                          |                        |              |                                                                                                                                  |        |
| Lucas G <sup>154</sup> | 2010, Uganda, East   | All consenting individuals residing in every household in 50 Rakai District communities | 1960 | 1202 HIV-infected patients and 664 HIV -ve age- and sex-matched controls | Age (years): HIV-ve, 28 (IQR: 24-35), HIV+ve: 30 (IQR: 25-36)<br>Male gender: HIV-ve: (38.7%), HIV+ve (36.4%) | eGFR< 60ml/min/1.73 m <sup>2</sup>                                            | MDRD                                                     | IDMS-calibrated        | Not measured | <b>Total prevalence among HIV+ve : 0.7%</b>                                                                                      | Medium |
| Yao J <sup>160</sup>   | 2011, sub-Saharan,   | Primary health care units                                                               | 2495 | HIV-infected patients before ART                                         | Age (years): 30 (IQR: 27-35)<br>Male gender: 30%<br>BMI:22.8 (IQR: 20.4-25.6) kg/m <sup>2</sup>               | CrCl <50 ml/min                                                               | CG,186 MDRD, CKD-EPI                                     | Not mentioned          | Not measured | <b>Total prevalence (CKD-EPI with coefficient for black race): 2.5%</b><br>CG: 3.4% (MDRD with coefficient for black race): 2.5% | Medium |
| Longo A <sup>99</sup>  | 2012, Congo, Central | Consecutive HIV patients from clinic                                                    | 300  | HIV-infected (ART treated=264) (ART naïve =36)                           | Age (years): 43 ± 9<br>Male gender: 23%<br>Hypertension: 13%                                                  | eGFR< 60 ml/min/1.73 m <sup>2</sup> / or proteinuria defined as 1+ or greater | proteinuria by dipstick and 24-hour proteinuria, eGFR by | Kinetic Jaffe and IDMS | 20.50%       | <b>Total prevalence : 20.5%</b><br><b>3% of the patients had eGFR&lt; 60 ml/min/1.73 m<sup>2</sup> by</b>                        | Low    |



1  
2  
3  
4  
5  
6  
7  
8  
9  
10  
11  
12  
13  
14  
15  
16  
17  
18  
19  
20  
21  
22  
23  
24  
25  
26  
27  
28  
29  
30  
31  
32  
33  
34  
35  
36  
37  
38  
39  
40  
41  
42  
43  
44  
45  
46  
47  
48  
49

|                         |                                        |                                                                                                    |      |                                          |                                                                                                                                |                                                                                                              |                                                                                     |                  |                 |                                                        |        |
|-------------------------|----------------------------------------|----------------------------------------------------------------------------------------------------|------|------------------------------------------|--------------------------------------------------------------------------------------------------------------------------------|--------------------------------------------------------------------------------------------------------------|-------------------------------------------------------------------------------------|------------------|-----------------|--------------------------------------------------------|--------|
|                         |                                        |                                                                                                    |      |                                          | BMI: 24 ± 5<br>(kg/m <sup>2</sup> )                                                                                            |                                                                                                              | MDRD, CG                                                                            |                  |                 | <b>MDRD</b>                                            |        |
| Farfo F <sup>109</sup>  | 2013,<br>Ghana,<br>West                | HIV clinic                                                                                         | 3137 | HIV-infected<br>patients starting<br>ART | Age (years): 38<br>(32-45)<br>Male gender: 33%<br>BMI: 20.3 (IQR:<br>17.6-22.7) kg/m <sup>2</sup>                              | eGFR <60<br>ml/min/1.73 m <sup>2</sup> ;<br>or proteinuria<br>≥+ 1<br>(confirmed by<br>uPCR > 45<br>mg/mmol) | Proteinuria<br>by urinary<br>strip, ACR,<br>PCR, eGFR<br>by CG,<br>MDRD,<br>CKD-EPI | Not<br>mentioned |                 | <b>Total prevalence<br/>(CKD-EPI): 13.8%</b>           | Low    |
| Gupta S <sup>161</sup>  | 2011,<br>Cameroon,<br>Central-<br>West | Electronic<br>medical<br>records of<br>patients from<br>18 sites<br>throughout<br>Western<br>Kenya | 7383 | HIV patients<br>without ART              | Age (years): 35.5<br>(29.3-44.0)<br>Male gender:<br>26.9%                                                                      | eGFR <60<br>ml/min/1.73 m <sup>2</sup>                                                                       | CG, MDRD                                                                            | Not<br>mentioned |                 | <b>Total prevalence<br/>(MDRD): 9.4%<br/>CG: 20.2%</b> | Medium |
| Ekant MH <sup>146</sup> | 2013,<br>Congo,<br>Central             | Ambulatory<br>Treatment<br>Center                                                                  | 562  | Newly diagnosed<br>HIV patients          | Age (years): 38.84<br>(IQR: 33.18-<br>46.23)<br>Male gender:<br>33.9%<br>BMI: 20.31 (IQR:<br>17.97-22.89)<br>kg/m <sup>2</sup> | eGFR < 60<br>ml/min/1.73m <sup>2</sup>                                                                       | 186MDRD                                                                             | Kinetic<br>Jaffe | Not<br>measured | <b>Total prevalence<br/>: 8.5%</b>                     | Low    |

1  
2  
3  
4  
5  
6  
7  
8  
9  
10  
11  
12  
13  
14  
15  
16  
17  
18  
19  
20  
21  
22  
23  
24  
25  
26  
27  
28  
29  
30  
31  
32  
33  
34  
35  
36  
37  
38  
39  
40  
41  
42  
43  
44  
45  
46  
47  
48  
49

|                                  |                           |                                                                                                  |     |                                                |                                                                                                                                                                                                           |                                                                                                                     |                                                                                                |                                                                                                          |                                                                                                                 |        |
|----------------------------------|---------------------------|--------------------------------------------------------------------------------------------------|-----|------------------------------------------------|-----------------------------------------------------------------------------------------------------------------------------------------------------------------------------------------------------------|---------------------------------------------------------------------------------------------------------------------|------------------------------------------------------------------------------------------------|----------------------------------------------------------------------------------------------------------|-----------------------------------------------------------------------------------------------------------------|--------|
| Wools-Kaloustian K <sup>80</sup> | 2007,<br>Kenya, East      | Academic<br>Model for the<br>Prevention<br>and<br>Treatment of<br>HIV/AIDS<br>(AMPATH)<br>clinic | 373 | HIV-infected<br>patients naive to<br>ART       | Age (years): 35.0<br>(range, 19–60)<br>Male gender:<br>32.1%<br>SBP: 104.7<br>(range, 80–140)<br>mm/Hg<br>CrCl<60<br>ml/min/1.73 m <sup>2</sup>                                                           | proteinuria<br>by urinary<br>strip, CG,<br>full and<br>abbreviated<br>MDRD                                          | Kinetic<br>assay                                                                               | 6.2%<br>(proteinuria<br>≥1+)                                                                             | <b>Total prevalence</b><br>: <b>11.50%</b>                                                                      | Low    |
| Emem C <sup>81</sup>             | 2008,<br>Nigeria,<br>West | HIV/AIDS<br>outpatient<br>clinic                                                                 | 400 | HIV-infected<br>patients                       | Age (years): 34.6<br>± 9.4<br>Male gender:<br>48.5%<br>Hypertension:<br>13.2%<br>BMI categories:<br><19.0 kg/m <sup>2</sup> : 59.2%<br>19-25 kg/m <sup>2</sup> :<br>37.5%<br>>25 kg/m <sup>2</sup> : 3.3% | albuminuria +1<br>or<br>on at least two<br>occasions (4<br>weeks apart) and<br>or serum<br>creatinine >1.5<br>mg/dl | Proteinuria<br>or<br>albuminuria<br>by urinary<br>strip and 24<br>hours<br>proteinuria ,<br>CG | Not<br>mentioned<br>38%<br>proteinuria<br>with<br>dipstick<br>21.9%<br>nephrotic<br>range<br>proteinuria | <b>Total prevalence</b><br>: <b>38.8 %</b><br>Among patients;<br>8.8% had CrCl <15<br>ml/min.                   | Medium |
| Wyatt C <sup>82</sup>            | 2011,<br>Rwanda,<br>East  | Community<br>based                                                                               | 891 | 677 HIV-<br>infected and 214<br>HIV-uninfected | Age (years): 34<br>(IQR: 30–39) HIV<br>+ve/43 (IQR:34–<br>50) HIV -ve<br>Male gender: 0                                                                                                                   | eGFR<60<br>ml/min/1.73 m <sup>2</sup> /<br>or proteinuria +1<br>or greater                                          | proteinuria<br>by urinary<br>strip, eGFR<br>by MDRD,<br>CKD-EPI,                               | Kinetic<br>Jaffe<br>(9% among<br>HIV +<br>and 7.2%<br>among non-<br>infected)                            | <b>Total prevalence</b><br><b>among HIV</b><br><b>+ve:9%</b><br>2.7% had eGFR<<br>60 ml/min/1.73 m <sup>2</sup> | Medium |

1  
2  
3  
4  
5  
6  
7  
8  
9  
10  
11  
12  
13  
14  
15  
16  
17  
18  
19  
20  
21  
22  
23  
24  
25  
26  
27  
28  
29  
30  
31  
32  
33  
34  
35  
36  
37  
38  
39  
40  
41  
42  
43  
44  
45  
46  
47  
48  
49

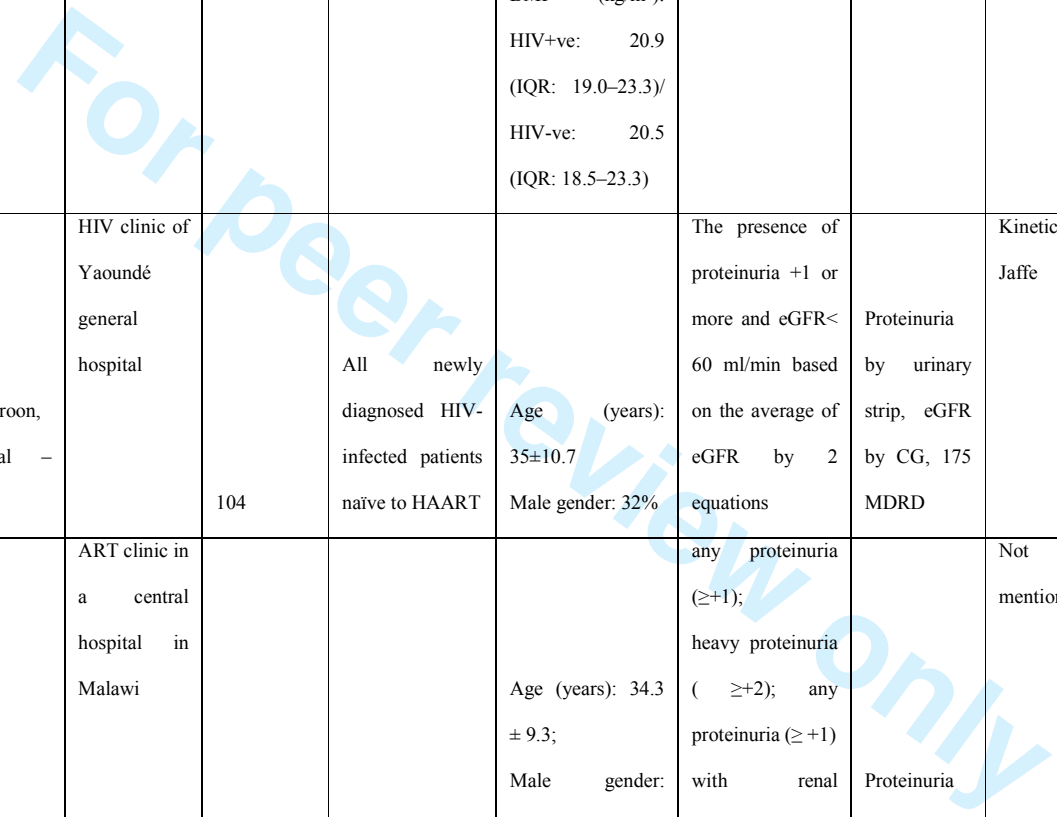

|                             |                                         |                                                     |     |                                                                    |                                                                                                                                                      |                                                                                                                                                                             |                                                                |                  |       |                                                                                                                                                  |     |
|-----------------------------|-----------------------------------------|-----------------------------------------------------|-----|--------------------------------------------------------------------|------------------------------------------------------------------------------------------------------------------------------------------------------|-----------------------------------------------------------------------------------------------------------------------------------------------------------------------------|----------------------------------------------------------------|------------------|-------|--------------------------------------------------------------------------------------------------------------------------------------------------|-----|
|                             |                                         |                                                     |     |                                                                    | Hypertension:<br>HIV+ve: 4.8%/<br>HIV-ve: 8.3%<br>BMI (kg/m <sup>2</sup> ):<br>HIV+ve: 20.9<br>(IQR: 19.0–23.3)/<br>HIV-ve: 20.5<br>(IQR: 18.5–23.3) |                                                                                                                                                                             | CG                                                             |                  |       | CKD prevalence<br>among HIV-ve:<br>7.2%<br>1.5% had eGFR<<br>60 ml/min/1.73 m <sup>2</sup>                                                       |     |
| olefackKaze F <sup>83</sup> | 2013,<br>Cameroon,<br>Central –<br>West | HIV clinic of<br>Yaoundé<br>general<br>hospital     | 104 | All newly<br>diagnosed HIV-<br>infected patients<br>naïve to HAART | Age (years):<br>35±10.7<br>Male gender: 32%                                                                                                          | The presence of<br>proteinuria +1 or<br>more and eGFR<<br>60 ml/min based<br>on the average of<br>eGFR by 2<br>equations                                                    | Proteinuria<br>by urinary<br>strip, eGFR<br>by CG, 175<br>MDRD | Kinetic<br>Jaffe | 36%   | <b>Total prevalence</b><br>: <b>36%</b><br>Among patients;<br>3% had eGFR< 60<br>ml/min/1,73 m <sup>2</sup>                                      | Low |
| struik G <sup>84</sup>      | 2011,<br>Malawi,<br>East                | ART clinic in<br>a central<br>hospital in<br>Malawi | 526 | Consecutive<br>newly referred<br>HIV-infected<br>patients on ART   | Age (years): 34.3<br>± 9.3;<br>Male gender:<br>43.5%<br>Hypertension:<br>11.2%<br>DM: 0.8%                                                           | any proteinuria<br>(≥+1);<br>heavy proteinuria<br>( ≥+2); any<br>proteinuria (≥ +1)<br>with renal<br>dysfunction (e<br>GFR <60<br>ml/min/1.73 m <sup>2</sup> )<br>and heavy | Proteinuria<br>by urinary<br>strip, eGFR<br>by CG and<br>MDRD  | Not<br>mentioned | 23.3% | <b>Total prevalence:</b><br><b>23.3%</b><br><b>Among patients</b><br><b>with proteinuria;</b><br><b>5.3% had CrCl&lt;</b><br><b>60 ml/minute</b> | Low |

1  
2  
3  
4  
5  
6  
7  
8  
9  
10  
11  
12  
13  
14  
15  
16  
17  
18  
19  
20  
21  
22  
23  
24  
25  
26  
27  
28  
29  
30  
31  
32  
33  
34  
35  
36  
37  
38  
39  
40  
41  
42  
43  
44  
45  
46  
47  
48  
49

|                          |                       |                                                         |     |                                              |                                       |                                                                                                                                                      |                                                      |               |                                     |                                                                                              |     |
|--------------------------|-----------------------|---------------------------------------------------------|-----|----------------------------------------------|---------------------------------------|------------------------------------------------------------------------------------------------------------------------------------------------------|------------------------------------------------------|---------------|-------------------------------------|----------------------------------------------------------------------------------------------|-----|
|                          |                       |                                                         |     |                                              |                                       | proteinuria ( $\geq 2$ ) with renal dysfunction (CrCl < 60 mL/minute) and the absence of any alternative cause for renal dysfunction or proteinuria. |                                                      |               |                                     |                                                                                              |     |
| Attolou V <sup>118</sup> | 1998, Benin, West     | National Central hospital                               | 92  | HIV-infected patients                        | Age(years): 22±4<br>Male gender: 68 % | Proteinuria > 0.5 g/24 hrs and SCr>14 mg/l                                                                                                           | Serum creatinine measurement and 24-hour proteinuria | Not mentioned | Proteinuria >0.5 g/24 hrs in 23.33% | <b>Total prevalence:27.16%</b>                                                               | Low |
| Agaba EI <sup>170</sup>  | 2003, Nigeria, West   | infections unit of the Jos University Teaching Hospital | 126 | Consecutive 79 AIDS patients and 57 controls |                                       | Not known                                                                                                                                            | Not known                                            | Not known     | 25% (AIDS group)                    | <b>Total prevalence among AIDS group:51.80%</b><br>CKD prevalence among control group: 12.2% | Low |
| Fana GT <sup>100</sup>   | 2011, Zimbabwe, South | Outpatient clinics                                      | 159 | HIV-infected patients naïve to ART           |                                       | CrCl < 60 ml/min.<br>Proteinuria $\geq +1$ and/or PCR > 20                                                                                           | Proteinuria by urinary strip and 24-hour             | Not mentioned | 45.90%                              | <b>Total prevalence : 45.9%</b><br>Among patients; 7.50% had CrCl<                           | Low |

1  
2  
3  
4  
5  
6  
7  
8  
9  
10  
11  
12  
13  
14  
15  
16  
17  
18  
19  
20  
21  
22  
23  
24  
25  
26  
27  
28  
29  
30  
31  
32  
33  
34  
35  
36  
37  
38  
39  
40  
41  
42  
43  
44  
45  
46  
47  
48  
49

|  |                              |                      |     |                                            |                                                                   |                                                                                                             |                                                                   |                             |                                |                                                                     |                                |     |
|--|------------------------------|----------------------|-----|--------------------------------------------|-------------------------------------------------------------------|-------------------------------------------------------------------------------------------------------------|-------------------------------------------------------------------|-----------------------------|--------------------------------|---------------------------------------------------------------------|--------------------------------|-----|
|  |                              |                      |     |                                            |                                                                   | mg/mg                                                                                                       | proteinuria,<br>eGFR by CG                                        |                             |                                | 60 ml/min                                                           |                                |     |
|  |                              | Medical center       |     |                                            |                                                                   | Microalbuminuria > urinary protein                                                                          |                                                                   | Not mentioned               |                                |                                                                     | Low                            |     |
|  |                              |                      |     |                                            | Age (years): 31(range,13-63)                                      | 30 and 300 mg/24 h.                                                                                         |                                                                   |                             |                                |                                                                     |                                |     |
|  |                              |                      |     |                                            | Male gender: 25%                                                  | A cut-off serum creatinine level of 250 mmol/l was used to exclude those patients with advanced nephropathy | Proteinuria by urinary strip and 24-hour proteinuria, CG and MDRD |                             |                                |                                                                     |                                |     |
|  | 2006, South Africa, South    |                      | 615 | HIV patients not on ART                    | 117±14/70±9                                                       | 121±15/81±10                                                                                                |                                                                   |                             | 6%                             | <b>Total prevalence (based on proteinuria): 6%</b>                  |                                |     |
|  | 2008, Uganda, East           | Home-Based AIDS Care | 508 | HIV patients starting HAART                | Age (years): 39 (median)                                          | CrCl of 25–50 ml/min                                                                                        | CG, 175 MDRD                                                      | Kinetic Jaffe               | Not measured                   | <b>Total prevalence: 20%</b>                                        | Low                            |     |
|  | 2011, Cameroon, Central-West | Clinics              | 389 | 199 HIV +ve and 190 HIV -ve pregnant women | Age (years): HIV+ve (27 (IQR: 24- 31)), HIV-ve (27 (IQR: 22 -31)) | Male gender: 0                                                                                              | Proteinuria (PCR > 200 mg/g)                                      | Not measured                | HIV+ve: 39.2%<br>HIV-ve: 20.9% | <b>Total prevalence among HIV+ve (based on proteinuria ): 39.2%</b> | Medium                         |     |
|  | 2011, Tanzania, East         | Outpatient clinics   | 355 | HIV-infected patients naïve to ART         | Age (years): 36.1 ±7.9                                            | Male gender: 35%                                                                                            | KDOQI                                                             | Proteinuria and albuminuria | Not mentioned                  | 36% proteinuria ≥                                                   | <b>Total prevalence: 85.6%</b> | Low |

1  
2  
3  
4  
5  
6  
7  
8  
9  
10  
11  
12  
13  
14  
15  
16  
17  
18  
19  
20  
21  
22  
23  
24  
25  
26  
27  
28  
29  
30  
31  
32  
33  
34  
35  
36  
37  
38  
39  
40  
41  
42  
43  
44  
45  
46  
47  
48  
49

|                          |                                 |                                                         |       |                                                                                                                        |                                                                                                                         |                                       |                                            |                                                     |                                               |        |
|--------------------------|---------------------------------|---------------------------------------------------------|-------|------------------------------------------------------------------------------------------------------------------------|-------------------------------------------------------------------------------------------------------------------------|---------------------------------------|--------------------------------------------|-----------------------------------------------------|-----------------------------------------------|--------|
|                          |                                 |                                                         |       |                                                                                                                        | BMI (kg/m <sup>2</sup> ): 21.3<br>±3.8                                                                                  |                                       | by urinary<br>strip eGFR<br>by CG,<br>MDRD | +1                                                  |                                               |        |
| Myer L <sup>162</sup>    | 2013, South<br>Africa,<br>South | primary<br>healthcare<br>clinic                         | 1861  | Consecutive 238<br>pregnant women,<br>1014 non-<br>pregnant, 609<br>men; HIV-<br>infected patients<br>eligible for ART | Age (years):<br>pregnant, 28 (IQR:<br>25–32), men, 37<br>(IQR: 32–45),<br>women, 33 (IQR:<br>28–39)<br>Male gender: 33% | CrCl< 60ml/min                        | Absolute Scr<br>and CG                     | Not<br>mentioned<br><br>Not<br>measured             | <b>Total prevalence:<br/>5.8%</b>             | Low    |
| Mulenga L <sup>163</sup> | 2008,<br>Zambia,<br>South       | Clinic                                                  | 25249 | HIV-infected,<br>ART-naïve<br>adults initiating<br>treatment                                                           | Age (years):<br>normal CrCl,<br>33.7±7.9,<br>decreased CrCl,<br>38.5±9.9<br>Male gender:<br>39.7%                       | CrCl< 60 ml/min                       | Absolute<br>Scr, eGFR<br>by CG and<br>MDRD | Not<br>mentioned<br><br>Not<br>measured             | <b>Total prevalence<br/>(MDRD): 3.2%</b><br>: | Medium |
| Adedeji T <sup>158</sup> | 2015,<br>Nigeria,<br>West       | The<br>University<br>of Ilorin<br>Teaching<br>hospital, | 183   | Newly diagnosed<br>HIV-infected<br>ART naïve<br>patients                                                               | Age (years): 37.9+<br>10.5<br>Male gender:<br>42.6%<br>BMI (kg/m <sup>2</sup> ):<br>20.88+ 3.56                         | eGFR< 60<br>ml/min/1.73m <sup>2</sup> | Absolute<br>Scr, eGFR<br>by MDRD           | Kinetic<br>Jaffe and<br>IDMS<br><br>Not<br>measured | <b>Total prevalence:<br/>24%</b>              | Low    |

1  
2  
3  
4  
5  
6  
7  
8  
9  
10  
11  
12  
13  
14  
15  
16  
17  
18  
19  
20  
21  
22  
23  
24  
25  
26  
27  
28  
29  
30  
31  
32  
33  
34  
35  
36  
37  
38  
39  
40  
41  
42  
43  
44  
45  
46  
47  
48  
49

|                                                                 |                                                                                                          |            |                                                                                                                                     |                                                                                                                                                                                                                                                                       |                                                                                      |                                                                                  |                                                                                                  |                                                                                                                       |            |
|-----------------------------------------------------------------|----------------------------------------------------------------------------------------------------------|------------|-------------------------------------------------------------------------------------------------------------------------------------|-----------------------------------------------------------------------------------------------------------------------------------------------------------------------------------------------------------------------------------------------------------------------|--------------------------------------------------------------------------------------|----------------------------------------------------------------------------------|--------------------------------------------------------------------------------------------------|-----------------------------------------------------------------------------------------------------------------------|------------|
| <p>2016,<br/>Nigeria,<br/>West<br/>nyabolu E<sup>135</sup></p>  | <p>Federal<br/>Medical<br/>Centre</p>                                                                    | <p>529</p> | <p>393 newly<br/>diagnosed drug-<br/>naïve HIV<br/>patients, 136 age<br/>and sex matched<br/>HIV-<br/>seronegative<br/>controls</p> | <p>Age (years); 38.84<br/>± 10.65<br/>Male gender: 28%<br/>BMI categories:<br/>&lt;18.5.0 kg/m<sup>2</sup>: 7%<br/>18.5-24.9 kg/m<sup>2</sup>:<br/>35%<br/>25-29.9 kg/m<sup>2</sup>:<br/>32%<br/>≥ 30 kg/m<sup>2</sup>:23%</p>                                        | <p>24-hours urine<br/>protein ≥0.300 g<br/>and/or GFR &lt;60<br/>ml/min</p>          | <p>Quantitative<br/>assessment<br/>of<br/>protienuria,<br/>Scr, and<br/>eGFR</p> | <p>Not<br/>mentioned<br/><br/><br/><br/><br/><br/><br/><br/><br/><br/><br/>Not<br/>mentioned</p> | <p><b>Total prevalence<br/>among HIV +ve<br/>patients:22.9%</b><br/><br/>Prevalence among<br/>HIV -ve: 8.1%</p>       | <p>Low</p> |
| <p>2015,<br/>Nigeria,<br/>West<br/>Ayokunle D<sup>113</sup></p> | <p>Medical Out-<br/>patient<br/>Department<br/>of University<br/>of Ilorin<br/>Teaching<br/>Hospital</p> | <p>335</p> | <p>227 newly-<br/>diagnosed, ART<br/>naïve patients<br/>with<br/>HIV/AIDS,<br/>108age and sex<br/>matched control<br/>group</p>     | <p>Age (years): 40.3<br/>± 10.3<br/>Male gender: 44%<br/>BMI (kg/m<sup>2</sup>): 20.5<br/>± 4.8 among HIV<br/>patients , 26.7 ±<br/>5.3 among control<br/>group<br/>SBP(mmHg):<br/>111.9 ± 1 among<br/>HIV patients,<br/>126.1 ± 12.0<br/>among control<br/>group</p> | <p>albuminuria ≥ 30<br/>mg/g and/or<br/>eGFR &lt; 60<br/>ml/ml/1.73m<sup>2</sup></p> | <p>Proteinuria<br/>by dipstick,<br/>and ACR<br/>and eGFR<br/>by MDRD</p>         | <p>Kinetic<br/>Jaffe<br/><br/><br/><br/><br/><br/><br/><br/><br/><br/><br/>Not<br/>mentioned</p> | <p><b>Total prevalence<br/>among HIV<br/>patients: 47.6%</b><br/><br/>The prevalence<br/>among HIV -ve:<br/>16.7%</p> | <p>Low</p> |

1  
2  
3  
4  
5  
6  
7  
8  
9  
10  
11  
12  
13  
14  
15  
16  
17  
18  
19  
20  
21  
22  
23  
24  
25  
26  
27  
28  
29  
30  
31  
32  
33  
34  
35  
36  
37  
38  
39  
40  
41  
42  
43  
44  
45  
46  
47  
48  
49

|                          |                   |                                |      |                                      |                                                                                                                                                                                                        |                              |                                                     |               |                                |                                                                            |        |
|--------------------------|-------------------|--------------------------------|------|--------------------------------------|--------------------------------------------------------------------------------------------------------------------------------------------------------------------------------------------------------|------------------------------|-----------------------------------------------------|---------------|--------------------------------|----------------------------------------------------------------------------|--------|
|                          |                   |                                |      |                                      | DBP(mmHg): 72.9 ± 9.5 among HIV patients, 80.6 ± 6.8 among control group                                                                                                                               |                              |                                                     |               |                                |                                                                            |        |
| Shadwick D <sup>14</sup> | 2015, Ghana, West | Komfo Anokye Teaching Hospital | 330  | HIV patients on ART                  | Age(years): 39 (IQR: 35–46)<br>Male gender: 25%<br>BMI(kg/m <sup>2</sup> ): 22.9 (IQR: 20.5-26.6)                                                                                                      | Proteinuria or CrCl<60ml/min | Proteinuria (dipsticks, PCR, and ACR) and GFR by CG | Not mentioned | 37% by dipstick and 12% by PCR | <b>Total prevalence (proteinuria) : 37%</b><br>CrCl<60 ml/min among 7%     | Low    |
| EdwardsJ <sup>166</sup>  | 2015, Kenya, East | Two primary care clinics       | 2206 | 210 HIV+ve patients and 1996 HIV –ve | Age (years): HIV +ve: 43 (IQR: 39–50), HIV-ve: 49 (IQR:40–56)<br>Male gender: HIV +ve: 31%, HIV-ve:28.7%<br>Hypertension: HIV+ve:44%, HIV-ve: 33.2%<br>Diabetes mellitus: HIV +ve: 5% , HIV –ve: 15.2% | CrCl<60 ml/min               | eGFR by CKD-EPI                                     | Not mentioned | Not measured                   | <b>Total prevalence: 12.1%</b><br><b>HIV+ve: 17%</b><br><b>Hiv-ve: 11%</b> | Medium |



1  
2  
3  
4  
5  
6  
7  
8  
9  
10  
11  
12  
13  
14  
15  
16  
17  
18  
19  
20  
21  
22  
23  
24  
25  
26  
27  
28  
29  
30  
31  
32  
33  
34  
35  
36  
37  
38  
39  
40  
41  
42  
43  
44  
45  
46  
47  
48  
49

|                            |                             |                                   |      |                                                                     |                                                                                                         |                                         |                                                                  |                                            |              |                                                                                             |        |
|----------------------------|-----------------------------|-----------------------------------|------|---------------------------------------------------------------------|---------------------------------------------------------------------------------------------------------|-----------------------------------------|------------------------------------------------------------------|--------------------------------------------|--------------|---------------------------------------------------------------------------------------------|--------|
| Glaser N <sup>14</sup>     | 2016, Malawi, East          | Lighthouse Clinic                 | 363  | 116 HIV +ve ART-naïve patients and 247 HIV-ve patients              | Age (years): 31 (IQR:26–39)<br>Male gender: 52%                                                         | eGFR < 60 ml/min                        | eGFR by CG, MDRD, and CKD-EPI with and without correction factor | IDMS calibrated creatinine and cystatin-C  | Not measured | <b>Total prevalence among HIV+ve (creatinine based CKD-EPI):1.9%</b>                        | Medium |
| Glaser N <sup>15</sup>     | 2016, Malawi, East          | Lighthouse Clinic                 | 363  | 116 HIV +ve patients and 247 HIV –ve patients                       | Age (years): 34.1 ±10.9<br>Male gender: 52%<br>BMI(kg/m <sup>2</sup> ): 23.2±4.8<br>Hypertension: 13.5% | KDOQI                                   | Proteinuria by dipstick and ACR, eGFR by CG, MDRD, and CKD-EPI   | IDMS calibrated creatinine and cystatin -C | 12.1%        | <b>Total prevalence : 13%</b><br>Prevalence among HIV+ve:22%<br>Prevalence among HIV-ve: 9% | Medium |
| Kamkuemah M <sup>167</sup> | 2015, South Africa, South   | Gugulethu Community Health Centre | 1092 | HIV infected patients initiated ART therapy                         | Age (years): 34 (IQR: 29- 41)<br>Male gender: 38%                                                       | eGFR < 60 ml/min                        | eGFR by CG                                                       | Not mentioned                              | Not measured | <b>Total prevalence: 2%</b>                                                                 | Medium |
| Nsagha D <sup>149</sup>    | 2015, Cameroon Central-West | Government hospitals              | 200  | HIV patients on HAART, DOTS or on the combined therapy (HAART/DOTS) | Age (years): 38.04 ± 10.52<br>Male gender: 50.5%                                                        | eGFR <60 ml/min per 1.73 m <sup>2</sup> | eGFR by MDRD                                                     | Kinetic Jaffe                              | Not measured | <b>Total prevalence: 8%</b>                                                                 | Low    |

1  
2  
3  
4  
5  
6  
7  
8  
9  
10  
11  
12  
13  
14  
15  
16  
17  
18  
19  
20  
21  
22  
23  
24  
25  
26  
27  
28  
29  
30  
31  
32  
33  
34  
35  
36  
37  
38  
39  
40  
41  
42  
43  
44  
45  
46  
47  
48  
49

|                          |                           |                                                               |     |                                                |                                                                                   |                                                                                                                    |                                                                |               |                       |                                                                         |        |
|--------------------------|---------------------------|---------------------------------------------------------------|-----|------------------------------------------------|-----------------------------------------------------------------------------------|--------------------------------------------------------------------------------------------------------------------|----------------------------------------------------------------|---------------|-----------------------|-------------------------------------------------------------------------|--------|
| Odongo P <sup>94</sup>   | 2015, Uganda, East        | infectious diseases clinic of Gulu Regional Referral Hospital | 361 | Newly diagnosed HIV patients not receiving ART | Age (years): 31.4 ± 9.5<br>Male gender: 36.3%<br>BMI(kg/m <sup>2</sup> ) <18: 33% | eGFR <60 ml/min per 1.73 m <sup>2</sup>                                                                            | Proteinuria by dipstick and eGFR by MDRD                       | Not mentioned | Proteinuria ≥ +1: 52% | <b>Total prevalence: 14.4%</b>                                          | Low    |
| Okafor U <sup>136</sup>  | 2016, Nigeria, West       | University of Benin Teaching Hospital                         | 383 | HIV infected naïve patients                    | Age (years): 36.03 ± 9.08<br>Male gender: 41%                                     | eGFR <60 ml/min per 1.73 m <sup>2</sup> and/or evidence of kidney injury as detected when the PCR (mg/g) was ≥200. | Quantitative assessment of proteinuria by PCR and eGFR by MDRD | Kinetic Jaffe | Not mentioned         | <b>Total prevalence: 53.5%</b>                                          | Low    |
| Seape T <sup>156</sup>   | 2016, South Africa, South | Medical in-patients at the Chris Hani Baragwanath Hospital    | 100 | HIV infected naïve patients                    | Age (years): 37.0±9.6<br>Male gender: 60%<br>BMI(kg/m <sup>2</sup> ): 20.9 ±5.1   | eGFR <60 ml/min per 1.73 m <sup>2</sup>                                                                            | eGFR by CG, MDRD, CKD-EPI                                      | IDMS          | Not measured          | <b>Total prevalence: 16%</b>                                            | Low    |
| Wensink G <sup>137</sup> | 2015, South Africa, South | Rural Medical Centre                                          | 903 | HIV infected adult patients                    | Age (years): 40(IQR:34-48)<br>Male gender: 31%<br>Diabetes mellitus:              | Albuminuria or eGFR <60 ml/min / 1.73 m <sup>2</sup>                                                               | Albuminuria by ACR and eGFR by MDRD and                        | Not mentioned | 21%                   | <b>Total prevalence (albuminuria): 21%</b><br><b>2% had eGFR&lt; 60</b> | Medium |

1  
2  
3  
4  
5  
6  
7  
8  
9  
10  
11  
12  
13  
14  
15  
16  
17  
18  
19  
20  
21  
22  
23  
24  
25  
26  
27  
28  
29  
30  
31  
32  
33  
34  
35  
36  
37  
38  
39  
40  
41  
42  
43  
44  
45  
46  
47  
48  
49

|  |                           |                                                      |     |                                             |                                                                                                                                                                              |                                         |                          |               |              |                                |        |
|--|---------------------------|------------------------------------------------------|-----|---------------------------------------------|------------------------------------------------------------------------------------------------------------------------------------------------------------------------------|-----------------------------------------|--------------------------|---------------|--------------|--------------------------------|--------|
|  |                           |                                                      |     |                                             | 4%                                                                                                                                                                           |                                         | CKD-EPI                  |               |              | ml/min/1.73 m <sup>2</sup>     |        |
|  |                           |                                                      |     |                                             | Hypertension:<br>23%                                                                                                                                                         |                                         |                          |               |              |                                |        |
|  |                           | Outpatient infectious clinic at an academic hospital |     |                                             | Age (years):<br>37.9±9.4<br>Male gender:<br>35.5%<br>Diabetes mellitus:2.2%                                                                                                  |                                         |                          | IDMS          |              |                                | Medium |
|  | 2016, South Africa, South |                                                      | 650 | HIV infected patients initiating ART        | Hypertension:<br>7.8%                                                                                                                                                        | eGFR <60 ml/min per 1.73 m <sup>2</sup> | eGFR by MDRD and CKD-EPI |               | Not measured | <b>Total prevalence: 2 %</b>   |        |
|  |                           | Anchor H <sup>157</sup>                              |     |                                             |                                                                                                                                                                              |                                         |                          |               |              |                                |        |
|  |                           | Jimma University Specialized Hospital                |     |                                             | Age ( years):<br>HAART naïve:<br>38.25 ±10.8,<br>HAART +ve:<br>35.14 ±9.2<br>Male gender: 37%<br>BMI(kg/m <sup>2</sup> ) :<br>HAART naïve:<br>20.7±3.2, HAART +ve: 21.6 ±3.5 |                                         |                          | Kinetic Jaffe |              |                                | Medium |
|  | 2016, Ethiopia, East      |                                                      | 446 | (223 HAART naïve and 223 HAART experienced) | Hypertension:<br>3.36%<br>Diabetes mellitus:<br>21.4%                                                                                                                        | eGFR <60 ml/min per 1.73 m <sup>2</sup> | eGFR by CG               |               | Not measured | <b>Total prevalence: 18.2%</b> |        |
|  |                           | Mekuria Y <sup>150</sup>                             |     |                                             |                                                                                                                                                                              |                                         |                          |               |              |                                |        |

1  
2  
3  
4  
5  
6  
7  
8  
9  
10  
11  
12  
13  
14  
15  
16  
17  
18  
19  
20  
21  
22  
23  
24  
25  
26  
27  
28  
29  
30  
31  
32  
33  
34  
35  
36  
37  
38  
39  
40  
41  
42  
43  
44  
45  
46  
47  
48  
49

DM: diabetes mellitus, BMI: body mass index, SBP: systolic blood pressure, DBP: diastolic blood pressure, IDMS: Isotope dilution mass spectrometry, HAART: highly active antiretroviral therapy, DOTS: directly observed treatment short course, ART: antiretroviral therapy, MDRD: Modification of Diet in Renal Disease, CG: Cockcroft Gault , CKD-EPI: Chronic Kidney Disease Epidemiology , IQR: inter-quartile range , KDOQI: Kidney Disease Outcome Quality Initiative

For peer review only

Table 4: Studies on CKD among diabetic patients

| Study ID                    | Year, Country, Region | Location                                                     | N   | Study group                   | Population Characteristics                                                                                                                                                                            | Definition of CKD                                                                                               | Method of outcome assessment                                | Creatinine assay | proteinuria                                        | CKD prevalence                                       | Quality assessment |
|-----------------------------|-----------------------|--------------------------------------------------------------|-----|-------------------------------|-------------------------------------------------------------------------------------------------------------------------------------------------------------------------------------------------------|-----------------------------------------------------------------------------------------------------------------|-------------------------------------------------------------|------------------|----------------------------------------------------|------------------------------------------------------|--------------------|
| Janmohamed MN <sup>86</sup> | 2013, Tanzania, East  | diabetes mellitus clinic of Bugando Medical Centre in Mwanza | 369 | Consecutive diabetic patients | Age (years): 54 (IQR: 45-62)<br>Male gender: 46.6%<br>Hypertension: 57.5%<br>BMI (kg/m <sup>2</sup> ): 25.6 (IQR: 22.6–29.6)<br>Duration of DM (years): 6(3 – 11)<br>93.8% type 2 DM<br>6.2% type 1DM | eGFR $\leq$ 60 ml/min/1.73 m <sup>2</sup> or evidence of kidney damage (microalbuminuria or overt proteinuria). | Microalbuminuria, proteinuria by urinary strips, eGFR by CG | Kinetic Jaffe    | Overt proteinuria (34.1%), microalbuminuria(45.8%) | <b>Total prevalence:83.7%</b>                        | Low                |
| Wanjohi FW <sup>87</sup>    | 2002, Kenya, East     | Outpatient diabetic clinic at Kenyatta National Hospital     | 100 | Type 2 diabetic patients      | Age (years): 53.7 $\pm$ 9.3<br>Male gender: 37%<br>Hypertension: 50%<br>BMI (kg/m <sup>2</sup> ): 27.8 $\pm$ 6.0<br>Duration of DM (months): 10.3 $\pm$ 7.5                                           | Albuminuria > 20 mg/ L                                                                                          | Albuminuria by urinary strip, CG                            | Not mentioned    | 26% had albuminuria                                | <b>Total prevalence( based on albuminuria ): 26%</b> | Low                |

|                          |                              |                                                                                         |     |                                                     |                                                                                                                                                |                                                                                                               |                                               |               |                                                       |                                |     |
|--------------------------|------------------------------|-----------------------------------------------------------------------------------------|-----|-----------------------------------------------------|------------------------------------------------------------------------------------------------------------------------------------------------|---------------------------------------------------------------------------------------------------------------|-----------------------------------------------|---------------|-------------------------------------------------------|--------------------------------|-----|
| Bouزيد C <sup>119</sup>  | 2011, Tunis, North           | Endocrinology center at the National Institute of nutrition                             | 689 | Type 2 diabetic patients from computerized hospital | Age (years): 60±11<br>Male gender: 39%<br>Hypertension: 84.6% (renal insufficiency), 57.2% (no renal disease)<br>Duration of DM (years): 11±8  | eGFR<60 ml/min                                                                                                | CG, 24-hour proteinuria                       | Not mentioned | 10.1%<br>macroalbuminuria,<br>13%<br>microalbuminuria | <b>Total prevalence: 19.8%</b> | Low |
| Choukem SP <sup>88</sup> | 2012, Cameroon, Central-West | Two main referral centres                                                               | 420 | Consecutive type 2 diabetic patients                | Age (years): 56.7 ±9.9<br>Male gender: 49%<br>Hypertension: 50%<br>BMI (kg/m <sup>2</sup> ): 28.5 ±5.2<br>Duration of DM (years): 4 (IQR: 1-9) | The presence of positive proteinuria with or without low CrCl < 90 ml/min/1.73 m <sup>2</sup>                 | Proteinuria by urinary strip/eGFR by CG       | Not mentioned |                                                       | <b>Total prevalence: 31%</b>   | Low |
| Keeton G <sup>120</sup>  | 2004, South Africa, South    | Groote Schuur Hospital Outpatients Diabetic Clinic or the Somerset Hospital Outpatients | 59  | Type 2 diabetic patients                            | Age (years): 62 ±9.4<br>Male gender: 36%<br>BMI (kg/m <sup>2</sup> ): (31± 6)<br>Duration of DM (years): 17 (Range: 14-33)                     | Double Scr level                                                                                              | Proteinuria by PCR, and serum creatinine      | Not mentioned |                                                       | <b>Total prevalence: 66.1%</b> | Low |
| BouAziz <sup>121</sup>   | 2012, Tunisia, North         | Basic Health Group of Sousse                                                            | 115 | 73 type 2 diabetic patients and 42 healthy          | Age (mean ±SE in years): 59.3 ±1.1<br>Male gender: 35%<br>SBP (mean ±SE mmHg): 136.3 ±3.1                                                      | Microalbuminuria (defined as < 2.8 g/mmol for women and < 2.3 for men) and eGFR≤60 ml/min/1.73 m <sup>2</sup> | Measurement of microalbuminuria, eGFR by MDRD | Not mentioned |                                                       | <b>Total prevalence: 11%</b>   | Low |

|                                |                             |                                           |     |                                                         |                                                                                                                                                                  |                         |                                                                        |                  |                                               |                                                                        |     |
|--------------------------------|-----------------------------|-------------------------------------------|-----|---------------------------------------------------------|------------------------------------------------------------------------------------------------------------------------------------------------------------------|-------------------------|------------------------------------------------------------------------|------------------|-----------------------------------------------|------------------------------------------------------------------------|-----|
|                                |                             |                                           |     | volunteers                                              | DBP (mean $\pm$ SE): 76.8<br>$\pm$ 1.9<br>BMI (mean $\pm$ SE in kg/m <sup>2</sup> ):<br>30.5 $\pm$ 0.7<br>Duration of DM (years):<br>10.6 $\pm$ 1                |                         |                                                                        |                  |                                               |                                                                        |     |
| Katchunga<br>P <sup>122</sup>  | 2010,<br>Congo,<br>Central  | Referral<br>general<br>hospital           | 98  | Medical<br>records of<br>type 2<br>diabetic<br>patients | Age (years): 58 $\pm$ 10.4<br>Male gender: 35.7%<br>Hypertension: 59.2%<br>BMI (kg/m <sup>2</sup> ): 25.2 $\pm$ 4.7<br>Duration of DM (years):<br>17.3 $\pm$ 8.5 | KDOQI                   | Microalbumin<br>uria (>20 mg/L<br>and <200<br>mg/L)<br>eGFR by<br>MDRD | Not<br>mentioned |                                               | <b>Total prevalence:<br/>66%</b>                                       | Low |
| Djrolo F <sup>123</sup>        | 2001, Benin,<br>West        | National<br>University<br>hospital centre | 152 | Type 1<br>and 2<br>diabetic<br>patients                 | Age (years): 53.3(range,<br>21-90)<br>Male gender: 65.8%<br>Duration of DM (years):<br><1 – 16 or more                                                           | Presence of proteinuria | 24-hour<br>proteinuria                                                 | Not<br>measured  | 28%                                           | <b>Total prevalence (<br/>based on<br/>proteinuria level):<br/>28%</b> | Low |
| Balogun<br>WO <sup>102</sup>   | 2011,<br>Nigeria,<br>West   | Tertiary<br>hospital                      | 40  | Randomly<br>selected<br>type 2<br>diabetic<br>patients  | Age (years): 59.4 $\pm$ 11.25<br>Male gender: 37.5%<br>Hypertension: 45%                                                                                         | not mentioned           | Proteinuria by<br>urinary strip<br>and 24 hrs,<br>eGFR by CG           | Jaffe<br>method  | 82.5%<br>macroalbuminuria                     | <b>Total prevalence:<br/>90%</b>                                       | Low |
| Mafundikwa<br>A <sup>103</sup> | 2007,<br>Zimbabwe,<br>South | Diabetic clinic                           | 75  | Consecuti<br>ve Insulin-<br>dependent                   | No available data                                                                                                                                                | No available data       | Proteinuria by<br>urinary strips<br>and 24-hour                        |                  | Overt proteinuria<br>21%.<br>Microalbuminuria | <b>Total prevalence:<br/>33%</b>                                       | Low |

|                         |                      |                                     |     |                                            |                                                                                                                                                                                                                                                  |                                                                                                                                                                                                                    |                                                    |               |                                                                                                                         |                                                                                                                      |        |
|-------------------------|----------------------|-------------------------------------|-----|--------------------------------------------|--------------------------------------------------------------------------------------------------------------------------------------------------------------------------------------------------------------------------------------------------|--------------------------------------------------------------------------------------------------------------------------------------------------------------------------------------------------------------------|----------------------------------------------------|---------------|-------------------------------------------------------------------------------------------------------------------------|----------------------------------------------------------------------------------------------------------------------|--------|
|                         |                      |                                     |     | diabetic patients                          |                                                                                                                                                                                                                                                  |                                                                                                                                                                                                                    | proteinuria                                        |               | 12%.                                                                                                                    |                                                                                                                      |        |
| Lutale J <sup>124</sup> | 2007, Tanzania, East | Outpatient diabetic clinic          | 204 | 91 Type 1 and 153 type 2 diabetic patients | 45% type 1 DM<br>55% type 2DM<br>Age (years): type 1, 21(14–44.8), type 2, 53 (23.5–85)<br>Male gender: 55%<br>hypertension: 42%<br>BMI (kg/m <sup>2</sup> ): 19.3 ± 3.8 (type 1), 27.8 ± 4.8 (type 2)<br>Duration of DM (years): 3(Range: 0-25) | KDOQI                                                                                                                                                                                                              | Quantitative assessment of albuminuria, CrCl by CG | Kinetic Jaffe | Type 1: microalbuminuria was 12.1% and macroalbuminuria 1.1%.<br>Type 2: microalbuminuria 9.8%<br>Macroalbuminuria 7.2% | <b>Total prevalence: 18.5%</b><br>4.6% of Type 1 patients and 22% of Type 2 had eGFR < 60 ml/min/1.73 m <sup>2</sup> | Low    |
| Gill G <sup>125</sup>   | 2008, Ethiopia, East | Diabetic clinic at Mekelle Hospital | 105 | All diabetic patients                      | Age (years): 41±16<br>Male gender: 70%<br>Hypertension: 5%<br>BMI (kg/m <sup>2</sup> ): 20.6 ±5.4<br>Duration of DM (years): 7±6                                                                                                                 | Nephropathy was considered present if the urinary ACR was >25.0mg/mmol and retinopathy was present. Microalbuminuria was diagnosed if the ACR was >2.5 and <25.0mg/mmol in men and >3.5 and <25.0mg/mmol in women. | ACR, Scr                                           | Not mentioned | 51% microalbuminuria                                                                                                    | <b>Total prevalence : 51%,</b>                                                                                       | Low    |
| Makulo R <sup>111</sup> | 2010, Congo, Central | Community based                     | 229 | 81 Diabetic and 148 impaired fasting       | Age (years): 53.1±16.3<br>Male gender: 33%<br>SBP (mmHg): 128.0±5.7<br>DBP (mmHg): 78.5±13.4<br>BMI (kg/m <sup>2</sup> ): 22.6±5.2                                                                                                               | eGFR of <60 mL/min/1.73 m <sup>2</sup>                                                                                                                                                                             | Urinary albumin by urinary strip and eGFR by       | Kinetic Jaffe | 29.6%                                                                                                                   | <b>Total prevalence: 29.6%</b><br>10% of the patients had eGFR< 60                                                   | Medium |



|                            |                                           |                                                                          |      | glucose patients                                       |                                                                                                                                                                                                   |                                        | 186MDRD                                       |               |                                                   | ml/min/1.73 m <sup>2</sup>                                                        |        |
|----------------------------|-------------------------------------------|--------------------------------------------------------------------------|------|--------------------------------------------------------|---------------------------------------------------------------------------------------------------------------------------------------------------------------------------------------------------|----------------------------------------|-----------------------------------------------|---------------|---------------------------------------------------|-----------------------------------------------------------------------------------|--------|
| Adebamowo S <sup>151</sup> | 2016, Nigeria, Ghana, Kenya (sub-Saharan) | University medical centers and surrounding communities                   | 4815 | 2208 Cases of type 2 DM and 2607 controls free from DM | Age (years): 48±15<br>Male gender:41%<br>Hypertension: ( 68.3% of type 2 DM, and 35.3% of diabetic-free)<br>BMI(kg/m <sup>2</sup> ): 26.9 ± 5.4 (diabetic patients)<br>25.5 ± 5.7 (non-diabetics) | eGFR of <60 ml/min/1.73 m <sup>2</sup> | eGFR by MDRD and CKD-EPI                      | Kinetic Jaffe | Not measured                                      | <b>Total prevalence (MDRD): 9%</b><br>13.4% of type 2DM and 4.8% of diabetic free | Medium |
| Feteh V <sup>95</sup>      | 2016, Cameroon, Central-West              | out-patient section of the endocrine unit of the Douala General Hospital | 636  | Cases of type 2 DM                                     | Age (years): 56.5 ± 10.6<br>Male gender: 53.1%<br>BMI (kg/m <sup>2</sup> ): 29.3 ± 14.7<br>Hypertension: 62.2%                                                                                    | eGFR of <60 ml/min/1.73 m <sup>2</sup> | Proteinuria by dipsticks and eGFR by 186 MDRD | Kinetic Jaffe | 68.4% among anemic patients ,<br>57.6% non anemic | <b>Total prevalence: 18.5%</b>                                                    | Low    |
| Fiseha T <sup>152</sup>    | 2014, Ethiopia, East                      | Follow-up clinic at Butajira hospital                                    | 214  | Diabetic patients                                      | Age (years): 45 ± 14.5<br>Male gender: 57.5%<br>SBP(mmHg): 121 ± 17<br>DBP(mmHg): 79 ± 10<br>BMI(kg/m <sup>2</sup> ): 25.26 ± 4.35                                                                | eGFR of <60 ml/min/1.73 m <sup>2</sup> | eGFR by CG and 186 MDRD                       | Kinetic Jaffe | Not measured                                      | <b>Total prevalence (MDRD): 18.2%</b><br>Prevalence (CG):23.8%                    | Medium |
| Pillay S <sup>96</sup>     | 2016, South Africa,                       | All patients seen at Edendale                                            | 653  | Diabetic patients with or                              | Among diabetic patients with HIV:<br>Age( years): 50-70                                                                                                                                           | eGFR of <60 ml/min/1.73 m <sup>2</sup> | Proteinuria by dipstick and eGFR by 186       | Kinetic Jaffe | 18%                                               | <b>Total prevalence : 18.8%</b>                                                   | Medium |

|                        |                   |                                                                                            |     |                                                  |                                                                                                       |                                                               |                                                       |               |       |                                                             |     |
|------------------------|-------------------|--------------------------------------------------------------------------------------------|-----|--------------------------------------------------|-------------------------------------------------------------------------------------------------------|---------------------------------------------------------------|-------------------------------------------------------|---------------|-------|-------------------------------------------------------------|-----|
|                        | South             | Hospital diabetic clinic                                                                   |     | without HIV (149 DM and HIV; 504 DM without HIV) | Male gender: 32%<br>Among diabetic patients without HIV<br>Age ( years): 51-60                        |                                                               | MDRD                                                  |               |       |                                                             |     |
| Eghan B <sup>138</sup> | 2007, Ghana, West | Outpatient diabetic clinic of the department of medicine at Komfo Anokye Teaching Hospital | 109 | Diabetic patients                                | Age (years): 54.1±10.9<br>Male gender: 28%<br>Hypertension: 39%<br>BMI(kg/m <sup>2</sup> ): 26.3± 4.4 | microalbuminuria if urine albumin excretion was 30–300 mg/day | Albuminuria by urine albumin excretion and eGFR by CG | Not mentioned | 43.1% | <b>Total prevalence( based on microalbuminuria ): 43.1%</b> | Low |

DM: diabetes mellitus, BMI: body mass index, SBP: systolic blood pressure, DBP: diastolic blood pressure, IDMS: Isotope dilution mass spectrometry, MDRD: Modification of Diet in Renal Disease, CG: Cockcroft Gault , CKD-EPI: Chronic Kidney Disease Epidemiology Collaboration, IQR: inter-quartile range , KDOQI: Kidney Disease Outcome Quality Initiative

Table 5: Studies on CKD among hypertensive patients

| Study ID                 | Year<br>Country<br>Region    | Location                             | N   | Study group                                   | Population characteristics                                                                                                                                                                                                                                                    | Definition of CKD                                                    | Method of outcome assessment                                 | Creatinine assay | Proteinuria  | CKD prevalence                                                                                         | Quality assessment |
|--------------------------|------------------------------|--------------------------------------|-----|-----------------------------------------------|-------------------------------------------------------------------------------------------------------------------------------------------------------------------------------------------------------------------------------------------------------------------------------|----------------------------------------------------------------------|--------------------------------------------------------------|------------------|--------------|--------------------------------------------------------------------------------------------------------|--------------------|
| Osafo C <sup>126</sup>   | 2011<br>Ghana,<br>West       | four polyclinics                     | 712 | Hypertensive patients                         | Age (years): 59 (range,19–90)<br>Male gender: 21.3%<br>DM: 14.7%<br>SBP (mmHg): 150 (range,100–280)<br>DBP (mmHg): 90 (range, 60–160)<br>BMI (kg/m <sup>2</sup> ): 29.7 (range,12.2–67.4)<br>BMI categories (kg/m <sup>2</sup> ):<br><25: 22.3%<br>25-29.9: 26%<br>>30: 45.7% | KDOQI                                                                | Proteinuria by PCR (men>0.3 women>0.2 mg/mg)<br>eGFR by MDRD | Kinetic Jaffe    | 28.90%       | <b>Total prevalence: 46.90%</b><br><b>Prevalence by stage:</b><br>Stage 1-2: 19.1%<br>Stage 3-5: 27.8% | Low                |
| Ajayi S <sup>164</sup>   | 2014<br>Nigeria,<br>West     | Tertiary health centre               | 628 | Records of hypertensive and diabetic patients | Age (years): 49.71±13.22<br>Male gender : 49%<br>DM: 8.6%<br>SBP (mmHg): 135.9 ± 27.4<br>DBP (mmHg): 87.0 ± 16.3<br>BMI ( kg/m <sup>2</sup> ): 27.8 ± 8.7                                                                                                                     | eGFR <60 mL/min/1.73 m <sup>2</sup>                                  | eGFR by MDRD                                                 | Not mentioned    | Not measured | <b>Total prevalence: 38.5%</b>                                                                         | Low                |
| Lengani A <sup>127</sup> | 2000<br>Burkina Faso<br>West | department of Cardiology or Internal | 342 | Hypertensive patients                         | Age (years): 50.6 ±13.8<br>Male gender: 58%                                                                                                                                                                                                                                   | Serum creatinine ≥ 650 µmol/l and or blood urea ≥35 mmol/l plus long | Measurement of scr, 24-hour proteinuria                      | Not mentioned    |              | <b>Total prevalence: 50.8%</b>                                                                         | Low                |

|                              |                               |                                              |      |                                        |                                                                                                                                                   |                                                                                                                                  |                                                    |                      |                                              |                                                                                |        |
|------------------------------|-------------------------------|----------------------------------------------|------|----------------------------------------|---------------------------------------------------------------------------------------------------------------------------------------------------|----------------------------------------------------------------------------------------------------------------------------------|----------------------------------------------------|----------------------|----------------------------------------------|--------------------------------------------------------------------------------|--------|
|                              |                               | medicine                                     |      |                                        |                                                                                                                                                   | history with clinical manifestations                                                                                             |                                                    |                      |                                              |                                                                                |        |
| Nwankwo E <sup>165</sup>     | 2006<br>Nigeria<br>West       | University of Maiduguri Teaching Hospital    | 185  | All hospitalized hypertensive patients | Age (years): 44.6 ± 14.9<br>Male gender: 49%                                                                                                      | Scr >135 µmol/l                                                                                                                  | Measurement of Scr                                 | Not mentioned        | Not measured                                 | <b>Total prevalence: 45.50%</b>                                                | Low    |
| Rayner B <sup>128</sup>      | 2006<br>South Africa<br>South | 100 General practice centres                 | 1091 | Random hypertensive patients           | Age (years): ≥35 years<br>Male gender: 48.5%<br>BMI: 23.6% of the patients had a normal BMI<br>41.9% were overweight and 34.2% were frankly obese | Albuminuria defined as (mg/mmol) microalbuminuria 3-30 macroalbuminuria >30                                                      | Quantitative assessment of albuminuria by ACR      | not measured         | 21.3% microalbuminuria 4.1% macroalbuminuria | <b>Total prevalence (based on albuminuria): 25.4%</b>                          | Medium |
| Plange-Rhule J <sup>89</sup> | 1999<br>Ghana,<br>West        | Komfo Anokye Teaching Hospital               | 448  | Hypertensive patients                  | Age (years): 50.5 ±13.0<br>Male gender: 36%<br>SBP (mmHg): 165.0 ±27.8<br>DBP (mmHg): 101.9 ±17.9                                                 | Plasma creatinine ≥140µmol/l                                                                                                     | Proteinuria by urinary strips and serum creatinine | Not mentioned        | 25.50%                                       | <b>Total prevalence: 30.2%</b>                                                 | Low    |
| Addo J <sup>141</sup>        | 2009<br>Ghana , West          | seven central government ministries in Accra | 219  | Hypertensive patients                  | Age (years): 50.4± 6.6<br>Male gender: 64%<br>SBP (mmHg):156.0 ±21.5<br>DBP (mmHg): 95 ±13<br>BMI (kg/m <sup>2</sup> ): 27.5 ± 5.4                | Persistent proteinuria on Urinalysis in the absence of urinary tract infection and/or impaired GFR<60 ml/min/1.73 m <sup>2</sup> | Proteinuria and eGFR by MDRD                       | Enzymatic assessment | 13.4%                                        | <b>Total prevalence: 13.4%</b><br>4.1% had eGFR< 60 ml/min/1.73 m <sup>2</sup> | Medium |

|                           |                   |                                                              |     |                                                                    |                                                                                                                                                                                                                                                                                                                                                                                                                                                                                                                                                                                         |                                                                            |                                                                 |               |       |                                                                                                                                                   |     |
|---------------------------|-------------------|--------------------------------------------------------------|-----|--------------------------------------------------------------------|-----------------------------------------------------------------------------------------------------------------------------------------------------------------------------------------------------------------------------------------------------------------------------------------------------------------------------------------------------------------------------------------------------------------------------------------------------------------------------------------------------------------------------------------------------------------------------------------|----------------------------------------------------------------------------|-----------------------------------------------------------------|---------------|-------|---------------------------------------------------------------------------------------------------------------------------------------------------|-----|
| Aryee C <sup>139</sup>    | 2016, Ghana, West | Komfo Anokye Teaching Hospital and the surrounding community | 242 | 180 non-diabetic hypertensive patients and 61 age matched controls | <p>Age (years): 22-87<br/>                     Male gender:37%<br/>                     SBP (mmHg): hypertensive patients( on antihypertensive therapy:155.46±1.82, no antihypertensive therapy:152±3.27), control (117.38±0.96)<br/>                     DBP (mmHg): hypertensive patients( on antihypertensive therapy:101.46±0.94, no antihypertensive therapy: 100.50±1.34), control (73.28±0.77)<br/>                     BMI (kg/m<sup>2</sup>): hypertensive patients( on antihypertensive therapy:29.52±0.39, no antihypertensive therapy: 29.8±0.71), control (29.36±0.65)</p> | eGFR <60 ml/min/1.73m <sup>2</sup>                                         | Urine albumin excretion, and eGFR by CG , 186 MDRD, and CKD-EPI | Not mentioned | 30%   | <p><b>Total prevalence (CKD-EPI): 14.5%</b><br/>                     Prevalence by MDRD:13.3%<br/>                     Prevalence by CG:16.6%</p> | Low |
| Nabbaale J <sup>140</sup> | 2015 Uganda East  | out- patient hypertension clinic                             | 256 | Newly diagnosed eligible black adult hypertensive patients         | <p>Age (years): 54.3 ± 6.2<br/>                     Male gender: 36.7%</p>                                                                                                                                                                                                                                                                                                                                                                                                                                                                                                              | Microalbuminuria as a random urine albumin level between 30 and 299 mg/dl. | Quantitative assessment of albumin in urine                     | Not measured  | 39.5% | <p><b>Total prevalence (based on microalbuminuria): 39.5%</b></p>                                                                                 | Low |

DM: diabetes mellitus, BMI: body mass index, SBP: systolic blood pressure, DBP: diastolic blood pressure, IDMS: Isotope dilution mass spectrometry, MDRD: Modification of Diet in Renal Disease, CG: Cockcroft Gault , CKD-EPI: Chronic Kidney Disease Epidemiology Collaboration, IQR: inter-quartile range , KDOQI: Kidney Disease Outcome Quality Initiative

Table 6: Studies on CKD among other populations

| Study ID                     | Year<br>Country<br>Region | Location                                                                    | N   | Study group                                          | Population Characteristics                                                                                           | Definition of CKD                                                                                | Method of outcome assessment            | Creatinine assay | Proteinuria | CKD prevalence                                                                                                            | Quality assessment |
|------------------------------|---------------------------|-----------------------------------------------------------------------------|-----|------------------------------------------------------|----------------------------------------------------------------------------------------------------------------------|--------------------------------------------------------------------------------------------------|-----------------------------------------|------------------|-------------|---------------------------------------------------------------------------------------------------------------------------|--------------------|
| E.F K <sup>19</sup>          | 2013<br>Senegal<br>West   | Nephrology department of the Aristide Le Dantec University Hospital Center. | 43  | Lupus patients                                       | Age (years): 32.9<br>Male gender: 7%<br>Hypertension: 30%                                                            | Proteinuria > 0.5 g/24 hours with or without hematuria/renal insufficiency/abnormal renal biopsy | 24-hour proteinuria and eGFR by CG      | Not mentioned    | 51%         | <b>Total prevalence: 72%</b>                                                                                              | Low                |
| Abd ElHafeez S <sup>29</sup> | 2009<br>Egypt<br>North    | The Nephrology department at the Main Alexandria University hospital        | 400 | Relatives of ESRD patients                           | Age (years): 35.2±11.6<br>Male gender: 50.8%<br>Hypertension: 60%<br>DM: 11.5%<br>BMI(kg/m <sup>2</sup> ): 28.5±5.89 | KDOQI                                                                                            | Proteinuria by urinary strips, 186 MDRD | Kinetic Jaffe    | 21.3%       | <b>Total prevalence 57%</b><br><b>Prevalence by stage:</b><br>Stage 1: 9%<br>Stage 2: 44%<br>Stage 3: 4%<br>Stage 4: 0.3% | medium             |
| Raji Y <sup>28</sup>         | 2015,<br>Nigeria,         | Nephrology out-patient                                                      | 469 | (230 first degree relatives of patients with CKD and | Age (years): 33.49 ± 12.0<br>BMI(kg/m <sup>2</sup> ): first degree relatives: 25.5 ± 5.3, controls: 23.8 ± 4.0       | Reduced eGFR                                                                                     | Albuminuria by ACR and eGFR by MDRD     | Not mentioned    | 46%         | <b>Total prevalence:</b>                                                                                                  | Low                |

|                          |                         |                                                          |     |                                                                                           |                                                                                                                                                                                                  |                                                                                                                                                                                                           |                                                                   |                      |        |                                                                                                                |        |
|--------------------------|-------------------------|----------------------------------------------------------|-----|-------------------------------------------------------------------------------------------|--------------------------------------------------------------------------------------------------------------------------------------------------------------------------------------------------|-----------------------------------------------------------------------------------------------------------------------------------------------------------------------------------------------------------|-------------------------------------------------------------------|----------------------|--------|----------------------------------------------------------------------------------------------------------------|--------|
|                          | West                    | clinic at<br>Lagos<br>University<br>Teaching<br>Hospital |     | 230 age- and gender-<br>matched controls with no<br>personal or family history<br>of CKD) | SBP(mmHg): first degree<br>relatives: 116.5 ± 22.5,<br>controls: 112.1 ± 18.1<br>DBP(mmHg): first degree<br>relatives: 74.9 ± 12.7,<br>controls: 71.4 ± 10.5                                     |                                                                                                                                                                                                           |                                                                   |                      |        | 4%                                                                                                             |        |
| ElSharif M <sup>24</sup> | 2013<br>Sudan<br>East   | Primary<br>health care                                   | 252 | Patients attending the<br>primary<br>health care facilities                               | Age (years): 43.35± 12.80<br>Male gender: 16%<br>Hypertension: 10%<br>DM: 5.95%<br>BMI (kg/m <sup>2</sup> ): 28.67 ± 6.43<br>BMI categories (kg/m <sup>2</sup> ):<br><18: 2.38%<br>>25.13: 71.83 | eGFR of < 60<br>mL/min/<br>1.73 m <sup>2</sup> with or<br>without proteinuria.                                                                                                                            | Proteinuria by urinary<br>strip and eGFR by MDRD                  | Not<br>mentioned     | 24.21% | <b>Total<br/>prevalence:<br/>10.32%</b>                                                                        | Low    |
| Mo A <sup>26</sup>       | 2009<br>Nigeria<br>West | Family<br>practice clinic                                | 250 | Newly registered patients<br>who attended the Family<br>Practice Clinic                   | Age (years): 50.52 + 13.03<br>Male gender: 27.2%<br>32% elevated SBP, 30%<br>elevated DBP<br>DM: 6%<br>Obesity: 32%                                                                              | Persistently<br>abnormal ACR<br>irrespective of GFR<br>level or persistent<br>eGFR < 60<br>mL/min/1.73 m <sup>2</sup><br>irrespective of the<br>presence or absence<br>of Kidney damage<br>after 3 months | Proteinuria by urinary<br>strip, eGFR by MDRD                     | Standardized<br>IDMS | 14.4%  | <b>Total<br/>prevalence:<br/>14.4%</b><br>10.4% had<br>persistent<br>eGFR< 60<br>ml/min/1.73<br>m <sup>2</sup> | Medium |
| Sumaili EK <sup>25</sup> | 2009<br>Congo           | Primary and<br>secondary                                 | 527 | At risk population<br>randomly selected                                                   | Age (years): 53.9 ± 15.5<br>Male gender: 43%<br>Hypertension: 58.2%<br>DM: 54.5%<br>Obesity: 16%                                                                                                 | KDOQI                                                                                                                                                                                                     | Proteinuria by urinary<br>strip, 24-hour proteinuria,<br>175 MDRD | Kinetic Jaffe        | 19%    | <b>Total<br/>prevalence:<br/>36%<br/>Prevalence<br/>by stage</b>                                               | High   |

|                          |                           |                                                     |      |                                                               |                                                                                                                                                    |                                                                                                          |                                                |                                   |                       |                                                                            |     |
|--------------------------|---------------------------|-----------------------------------------------------|------|---------------------------------------------------------------|----------------------------------------------------------------------------------------------------------------------------------------------------|----------------------------------------------------------------------------------------------------------|------------------------------------------------|-----------------------------------|-----------------------|----------------------------------------------------------------------------|-----|
|                          | Central                   | health care                                         |      |                                                               |                                                                                                                                                    |                                                                                                          |                                                |                                   |                       | stage 1: 4.2%, stage 2: 6.1%, stage 3: 18.3%, stage 4: 1.9%, stage 5: 5.7% |     |
| Anyabolu E <sup>30</sup> | 2016, Nigeria, West       | Federal Medical Center                              | 136  | Subjects from medical out-patient department of the hospital. | Age (years): 38.58±11.79<br>Male gender: 27.9%<br>BMI(kg/m <sup>2</sup> ): 25.51±6.47                                                              | Proteinuria as 24 hours protein ≥ 0.300g and impaired renal filtration function as CrCl <90mls/min       | Proteinuria by quantitative assessment and Scr | Kinetic Jaffe                     | 14.1% had proteinuria | <b>Total prevalence: 14.1%</b>                                             | Low |
| Dessein P <sup>20</sup>  | 2015, South Africa, South | Charlotte Maxeke Johannesburg and Milpark Hospitals | 233  | African patients with rheumatoid arthritis                    | Age (years): 57.1±10.8<br>Male gender: 17.2%<br>BMI(kg/m <sup>2</sup> ): 27.4±6.0<br>Hypertension: 57.5%<br>Diabetes mellitus: 12.5%               | eGFR < 60ml/min/1.73m <sup>2</sup>                                                                       | eGFR by CG, MDRD, CKD-EPI                      | Kinetic Jaffe and IDMS calibrated | Not measured          | <b>Total prevalence: 39%</b>                                               | Low |
| Ephraim R <sup>21</sup>  | 2015, Ghana, West         | Tema General Hospital                               | 194  | Patients with sickle cell anemia                              | Age (years): 23.25 ± 12.04<br>Male gender: 43.3%<br>SBP(mmHg): 110.06 ± 8.27<br>DBP(mmHg): 67.16 ± 8.23<br>BMI (kg/m <sup>2</sup> ): 18.85 ± 11.19 | (eGFR < 60 mL/min/ 1.73 m <sup>2</sup> or evidence of kidney damage as albuminuria, or overt proteinuria | Proteinuria by dipstick and eGFR by CKD-EPI    | IDMS                              | 13.4%                 | <b>39.2%</b>                                                               | Low |
| van                      | 2010                      | Tertiary                                            | 1216 | New patients referred to                                      | Age (years): 39.6 ± 15.9                                                                                                                           | Elevated SCr(>130                                                                                        | Proteinuria by quantitative                    | Not                               | 16.7%                 | <b>Total</b>                                                               | Low |



|                           |                                     |                                                                                    |    |                                                                                                                                               |                                                                     |                                                                            |                                                                          |               |                                                     |                                                                  |     |
|---------------------------|-------------------------------------|------------------------------------------------------------------------------------|----|-----------------------------------------------------------------------------------------------------------------------------------------------|---------------------------------------------------------------------|----------------------------------------------------------------------------|--------------------------------------------------------------------------|---------------|-----------------------------------------------------|------------------------------------------------------------------|-----|
| 27                        | Rensburg B<br>South Africa<br>South | hospital                                                                           |    | the Renal Unit                                                                                                                                | Male gender: 51.1%<br>Hypertension: 13.2%<br>DM: 10.8%              | µmol/L) and small kidneys on imaging without evidence of reversible causes | assessment and Scr measurement                                           | mentioned     | proteinuria >3.5 g/dl                               | <b>prevalence: 37.9%</b>                                         |     |
| M <sup>104</sup>          | Hamdouk<br>Sudan<br>East            | hairdressing saloons                                                               | 72 | Hairdressers                                                                                                                                  | Age (years): 40±8<br>Male gender: 0%<br>Hypertension: 19.4%         | Scr level ≥2 mg/dl                                                         | Proteinuria by urinary strip and 24 hrs Scr measurement and renal biopsy | Not mentioned | 26.4% had albuminuria                               | <b>Total prevalence: 26.4%</b><br>14% had Scr ≥2 mg/dl           | Low |
| EL-Safty I <sup>129</sup> | 2003<br>Egypt<br>North              | male workers attending the out-patient clinic of the Health Insurance Organization | 81 | Male workers attending the out-patient clinic of the Health Insurance Organization Workers (29 non-silicotics, 24 silicotics and 28 referent) | Age (years): 39.83±7.27<br>Male gender: 100%<br>Hypertension: 19.4% | Elevated proteinuria                                                       | Assessment of proteinuria quantitatively                                 | Not measured  | 93% among non-silica exposed<br>100% silica exposed | <b>Total prevalence (among those with Silica exposure): 100%</b> | Low |

DM: diabetes mellitus, BMI: body mass index, SBP: systolic blood pressure, DBP: diastolic blood pressure, IDMS: Isotope dilution mass spectrometry, MDRD: Modification of Diet in Renal Disease, CG: Cockcroft Gault, CKD-EPI: Chronic Kidney Disease Epidemiology Collaboration, IQR: inter-quartile range, KDOQI: Kidney Disease Outcome Quality Initiative

## Titles and legends

**Fig. 1** Flow diagram of the study selection

**Fig. 2** Prevalence of CKD among entire general population

**Fig. 3** Main causes of CKD

## Supporting information

**S1 Table:** Search strategy adopted in PubMed and Ovid MEDLINE

**S2 Table:** Studies among CKD patients

For peer review only

## REFERENCES

1. Levey AS, Atkins R, Coresh J, et al. Chronic kidney disease as a global public health problem: approaches and initiatives - a position statement from Kidney Disease Improving Global Outcomes. *Kidney international* 2007;72(3):247-59. doi: 10.1038/sj.ki.5002343
2. Zoccali C, Kramer A, Jager KJ. Epidemiology of CKD in Europe: an uncertain scenario. *Nephrology dialysis transplantation* 2010;25(6):1731-33.
3. Global, regional, and national age–sex specific all-cause and cause-specific mortality for 240 causes of death, 1990–2013: a systematic analysis for the Global Burden of Disease Study 2013. *The Lancet* 2015;385(9963):117-71. doi: 10.1016/s0140-6736(14)61682-2
4. Bello AK, Peters J, Rigby J, et al. Socioeconomic status and chronic kidney disease at presentation to a renal service in the United Kingdom. *Clinical journal of the American Society of Nephrology : CJASN* 2008;3(5):1316-23. doi: 10.2215/cjn.00680208 [published Online First: 2008/06/27]
5. El Nahas AM, Bello AK. Chronic kidney disease: the global challenge. *The Lancet* 2005;365(9456):331-40.
6. UN. World Population Prospects: The 2015 Revision, Key Findings and Advance Tables: United Nations 2015 [Available from: [http://esa.un.org/unpd/wpp/publications/files/key\\_findings\\_wpp\\_2015.pdf](http://esa.un.org/unpd/wpp/publications/files/key_findings_wpp_2015.pdf) accessed November 8, 2015
7. Aikins Ad-G, Unwin N, Agyemang C, et al. Commentary Tackling Africa's chronic disease burden: from the local to the global. 2010
8. Organization WH. Global action plan for the prevention and control of noncommunicable diseases 2013-2020. 2013
9. Stanifer JW, Jing B, Tolan S, et al. The epidemiology of chronic kidney disease in sub-Saharan Africa: a systematic review and meta-analysis. *The Lancet Global Health* 2014;2(3):e174-81. doi: [http://dx.doi.org/10.1016/S2214-109X\(14\)70002-6](http://dx.doi.org/10.1016/S2214-109X(14)70002-6)
10. Anothaisintawee T, Rattanasiri S, Ingsathit A, et al. Prevalence of chronic kidney disease: a systematic review and meta-analysis. *Clinical nephrology* 2009;71(3):244-54.
11. Liberati A, Altman DG, Tetzlaff J, et al. The PRISMA statement for reporting systematic reviews and meta-analysis of studies that evaluate health care interventions: explanation and elaboration. *Italian Journal of Public Health* 2012;6(4)
12. Matsha TE, Yako YY, Rensburg MA, et al. Chronic kidney diseases in mixed ancestry south African populations: prevalence, determinants and concordance between kidney function estimators. *BMC nephrology* 2013;14:75. doi: <http://dx.doi.org/10.1186/1471-2369-14-75>
13. Eastwood JB, Kerry SM, Plange-Rhule J, et al. Assessment of GFR by four methods in adults in Ashanti, Ghana: the need for an eGFR equation for lean African populations.[Erratum appears in *Nephrol Dial Transplant*. 2011 Dec;26(12):4153 Note: Emmett, Lynsey [added]; Miller, Michelle A [added]]. *Nephrology Dialysis Transplantation* 2010;25(7):2178-87. doi: <http://dx.doi.org/10.1093/ndt/gfp765>
14. Glaser N, Deckert A, Phiri S, et al. Comparison of Various Equations for Estimating GFR in Malawi: How to Determine Renal Function in Resource Limited Settings? *PloS one* 2015;10(6):e0130453. doi: 10.1371/journal.pone.0130453 [published Online First: 2015/06/18]
15. Juni P, Altman DG, Egger M. Systematic reviews in health care: Assessing the quality of controlled clinical trials. *BMJ (Clinical research ed)* 2001;323(7303):42-6. [published Online First: 2001/07/07]
16. Whiting P, Rutjes AW, Reitsma JB, et al. The development of QUADAS: a tool for the quality assessment of studies of diagnostic accuracy included in systematic reviews. *BMC medical research methodology* 2003;3:25. doi: 10.1186/1471-2288-3-25 [published Online First: 2003/11/11]
17. Shamliyan T, Kane RL, Dickinson S. A systematic review of tools used to assess the quality of observational studies that examine incidence or prevalence and risk factors for diseases. *J Clin Epidemiol* 2010;63(10):1061-70. doi: 10.1016/j.jclinepi.2010.04.014 [published Online First: 2010/08/24]
18. Cohen J. A Coefficient of Agreement for Nominal Scales. *Educational and Psychological Measurement* 1960;20(1):37-46. doi: 10.1177/001316446002000104
19. Ka EF, Cisse MM, Lemrabott AT, et al. [Lupus nephropathy in black patients with systemic lupus erythematosus in Senegal: 43 cases]. *Medecine et sante tropicales* 2013;23(3):328-31. doi: 10.1684/mst.2013.0200 [published Online First: 2013/10/29]
20. Dessein PH, Hsu HC, Tsang L, et al. Kidney function, endothelial activation and atherosclerosis in black and white Africans with rheumatoid arthritis. *PloS one* 2015;10(3):e0121693. doi: 10.1371/journal.pone.0121693 [published Online First: 2015/03/26]
21. Ephraim RK, Osakunor DN, Cudjoe O, et al. Chronic kidney disease is common in sickle cell disease: a cross-sectional study in the Tema Metropolis, Ghana. *BMC nephrology* 2015;16:75. doi: 10.1186/s12882-015-0072-y [published Online First: 2015/05/30]
22. Ghahramani N. Silica nephropathy. *The international journal of occupational and environmental medicine* 2010;1(3 July)

23. Sampathkumar K, Yesudas S. Hair dye poisoning and the developing world. *Journal of emergencies, trauma and shock* 2009;2(2):129.
24. Elsharif ME, Abdullha SM, Abdalla SM, et al. The magnitude of chronic kidney diseases among primary health care attendees in Gezira state, Sudan. *Saudi journal of kidney diseases and transplantation : an official publication of the Saudi Center for Organ Transplantation, Saudi Arabia* 2013;24(4):807-9. [published Online First: 2013/07/03]
25. Sumaili EK, Cohen EP, Zinga CV, et al. High prevalence of undiagnosed chronic kidney disease among at-risk population in Kinshasa, the Democratic Republic of Congo. *BMC nephrology* 2009;10:18. doi: 10.1186/1471-2369-10-18 [published Online First: 2009/07/23]
26. Afolabi MO, Abioye-Kuteyi E, Arogundade FA, et al. Prevalence of chronic kidney disease in a Nigerian family practice population. *South African Family Practice* 2009;51(2):132-37.
27. van Rensburg BW, van Staden AM, Rossouw GJ, et al. The profile of adult nephrology patients admitted to the Renal Unit of the Universitas Tertiary Hospital in Bloemfontein, South Africa from 1997 to 2006. *Nephrology Dialysis Transplantation* 2010;25(3):820-4. doi: <http://dx.doi.org/10.1093/ndt/gfp535>
28. Raji Y, Mabayoje O, Bello T. Familial clustering of risk factors for cardiovascular disease among first-degree relatives of patients with chronic kidney disease in a sub-Saharan African population. *Cardiovascular journal of Africa* 2015;26(2 Suppl 1):S11-4. doi: 10.5830/cvja-2015-041 [published Online First: 2015/05/13]
29. The unrecognized prevalence of chronic kidney disease among family members of end stage renal disease patients [IEA-EEF abstract 264]; 2009. *European Journal of Epidemiology*.
30. Anyabolu EN, Chukwuonye, II, Anyabolu AE, et al. A look at risk factors of proteinuria in subjects without impaired renal filtration function in a general population in Owerri, Nigeria. *The Pan African medical journal* 2016;23:257. doi: 10.11604/pamj.2016.23.257.8189 [published Online First: 2016/08/16]
31. El Khayat SS, Hallal K, Gharbi MB, et al. Fate of patients during the first year of dialysis. *Saudi journal of kidney diseases and transplantation : an official publication of the Saudi Center for Organ Transplantation, Saudi Arabia* 2013;24(3):605-9. [published Online First: 2013/05/04]
32. Seck SM, Diallo IM, Diagne SI. Epidemiological patterns of chronic kidney disease in black African elders: a retrospective study in West Africa. *Saudi Journal of Kidney Diseases & Transplantation* 2013;24(5):1068-72.
33. Seck SM, Elhadj FK, Fall S, et al. [Adherence to therapy in sub-Saharan non-dialysed patients with chronic kidney diseases]. *Nephrologie et Therapeutique* 2008;4(5):325-9. doi: <http://dx.doi.org/10.1016/j.nephro.2008.02.004>
34. Bourquia A. [Autosomal dominant polycystic kidney disease (ADPKD). in Morocco. Multicenter study about 308 families]. *Nephrologie* 2002;23(2):93-6. [published Online First: 2002/05/16]
35. Ouattara B, Kra O, Yao H, et al. [Characteristics of chronic renal failure in black adult patients hospitalized in the Internal Medicine department of Treichville University Hospital]. *Nephrologie et Therapeutique* 2011;7(7):531-4. doi: <http://dx.doi.org/10.1016/j.nephro.2011.03.009>
36. Lengani A, Coulibaly G, Laville M, et al. [Epidemiology of severe chronic renal insufficiency in Burkina Faso]. *Sante (Montrouge, France)* 1997;7(6):379-83. [published Online First: 1998/03/21]
37. Afifi AM, Mady GE, Ahmad AA, et al. Pattern of renal diseases among elderly Egyptians patients with acute or chronic renal diseases in Ain Shams University and Nasser Institute Hospitals, Cairo, Egypt. *Journal of the Egyptian Society of Parasitology* 2005;35(3):911-24. [published Online First: 2005/12/13]
38. Diouf B, Ka EF, Niang A, et al. [Etiologies of chronic renal insufficiency in a adult internal medicine service in Dakar]. *Dakar medical* 2000;45(1):62-5. [published Online First: 2003/12/12]
39. Niang A, Dial C, Ka EF, et al. [Nephrotic syndrom with focal and segmental glomerulosclerosis in Dakar: epidemiological and clinicopathological characteristics (about 134 cases)]. *Dakar medical* 2008;53(1):45-51. [published Online First: 2008/12/24]
40. Sabi KA, Gnionsahe DA, Amedegnato D. [Chronic kidney failure in Togo: clinical, laboratory, and etiological aspects]. *Medecine tropicale : revue du Corps de sante colonial* 2011;71(1):74-6. [published Online First: 2011/05/19]
41. Ulasi II, Ijoma CK. The enormity of chronic kidney disease in Nigeria: the situation in a teaching hospital in South-East Nigeria. *Journal of tropical medicine* 2010;2010
42. Abderrahim E, Zouaghi K, Hedri H, et al. Renal replacement therapy for diabetic end-stage renal disease. Experience of a Tunisian hospital centre. *Diabetes & metabolism* 2001;27(5 Pt 1):584-90.
43. Abdou N, Boucar D, El Hadj Fary KA, et al. Histopathological profiles of nephropathies in senegal. *Saudi journal of kidney diseases and transplantation : an official publication of the Saudi Center for Organ Transplantation, Saudi Arabia* 2003;14(2):212-4. [published Online First: 2008/01/23]
44. Afifi A, El Setouhy M, El Sharkawy M, et al. Diabetic nephropathy as a cause of end-stage renal disease in Egypt: a six-year study. *Eastern Mediterranean health journal = La revue de sante de la Mediterranee orientale = al-Majallah al-sihhiyah li-sharq al-mutawassit* 2004;10(4-5):620-6. [published Online First: 2005/12/13]
45. Afifi A, Karim MA. Renal replacement therapy in Egypt: first annual report of the Egyptian Society of Nephrology, 1996. *Eastern Mediterranean health journal = La revue de sante de la Mediterranee orientale = al-Majallah al-sihhiyah li-sharq al-mutawassit* 1999;5(5):1023-9. [published Online First: 2000/09/13]
46. Agaba EI, Wigwe CM, Agaba PA, et al. Performance of the Cockcroft-Gault and MDRD equations in adult Nigerians with chronic kidney disease. *International urology and nephrology* 2009;41(3):635-42. doi:

- 10.1007/s11255-008-9515-8 [published Online First: 2009/01/13]
47. Alashek WA, McIntyre CW, Taal MW. Epidemiology and aetiology of dialysis-treated end-stage kidney disease in Libya. *BMC nephrology* 2012;13:33. doi: 10.1186/1471-2369-13-33 [published Online First: 2012/06/12]
  48. Alasia DD, Emem-Chioma P, Wokoma FS. A single-center 7-year experience with end-stage renal disease care in Nigeria—a surrogate for the poor state of ESRD care in Nigeria and other sub-saharan african countries: advocacy for a global fund for ESRD care program in sub-saharan african countries. *Int J Nephrol* 2012;2012:639653. doi: <http://dx.doi.org/10.1155/2012/639653>
  49. Alebiosu CO, Ayodele OO, Abbas A, et al. Chronic renal failure at the Olabisi Onabanjo University Teaching Hospital, Sagamu, Nigeria. *African health sciences* 2006;6(3):132-8. doi: 10.5555/afhs.2006.6.3.132 [published Online First: 2006/12/05]
  50. Amira CO, Braimoh RW, Bello BT. Pattern of intradialytic complications at the Lagos University Teaching Hospital. *African journal of medicine and medical sciences* 2012;41(4):411-6. [published Online First: 2013/05/16]
  51. Arogundade FA, Sanusi AA, Hassan MO, et al. The pattern, clinical characteristics and outcome of ESRD in Ile-Ife, Nigeria: is there a change in trend? *African health sciences* 2011;11(4):594-601. [published Online First: 2012/06/01]
  52. Counil E, Cherni N, Kharrat M, et al. Trends of incident dialysis patients in Tunisia between 1992 and 2001. *American journal of kidney diseases : the official journal of the National Kidney Foundation* 2008;51(3):463-70. doi: 10.1053/j.ajkd.2007.10.032 [published Online First: 2008/02/26]
  53. Chijioke A, Makusidi AM, Kolo PM. Electrocardiographic abnormalities among dialysis naive chronic kidney disease patients in Ilorin Nigeria. *Annals of African medicine* 2012;11(1):21-6. doi: 10.4103/1596-3519.91011 [published Online First: 2011/12/27]
  54. Madala ND, Thusi GP, Assounga AG, et al. Characteristics of South African patients presenting with kidney disease in rural KwaZulu-Natal: a cross sectional study. *BMC nephrology* 2014;15:61. doi: <http://dx.doi.org/10.1186/1471-2369-15-61>
  55. Okpechi IG, Ayodele OE, Rayner BL, et al. Kidney disease in elderly South Africans. *Clinical nephrology* 2013;79(4):269-76. doi: <http://dx.doi.org/10.5414/CN107746>
  56. Laleye A, Awede B, Agboton B, et al. Autosomal dominant polycystic kidney disease in University Clinic of Nephrology and Haemodialysis of Cotonou: clinical and genetical findings. *Genetic Counseling* 2012;23(4):435-45.
  57. Okunola Y, Ayodele O, Akinwusi P, et al. Haemodialysis practice in a resource-limited setting in the tropics. *Ghana medical journal* 2013;47(1):4-9. [published Online First: 2013/05/11]
  58. Bello BT, Raji YR, Sanusi I, et al. Challenges of providing maintenance hemodialysis in a resource poor country: Experience from a single teaching hospital in Lagos, Southwest Nigeria. *Hemodialysis international International Symposium on Home Hemodialysis* 2013;17(3):427-33. doi: 10.1111/hdi.12024 [published Online First: 2013/02/05]
  59. El Minshawy O. End-stage renal disease in the El-Minia Governorate, upper Egypt: an epidemiological study. *Saudi journal of kidney diseases and transplantation : an official publication of the Saudi Center for Organ Transplantation, Saudi Arabia* 2011;22(5):1048-54. [published Online First: 2011/09/14]
  60. Okpechi IG, Rayner BL, Swanepoel CR. Nephrotic syndrome in adult black South Africans: HIV-associated nephropathy as the main culprit. *Journal of the National Medical Association* 2010;102(12):1193-7.
  61. Madala ND, Nkwanyana N, Dubula T, et al. Predictive performance of eGFR equations in South Africans of African and Indian ancestry compared with 99mTc-DTPA imaging. *International Urology & Nephrology* 2012;44(3):847-55. doi: <http://dx.doi.org/10.1007/s11255-011-9928-7>
  62. El Farouki MR, Bahadi A, Hamzi MA, et al. [Profile of chronic renal failure in diabetes at initiation of hemodialysis in the nephrology and dialysis service of the military hospital in Rabat, Morocco]. *The Pan African medical journal* 2013;15:124. doi: 10.11604/pamj.2013.15.124.2252 [published Online First: 2013/11/21]
  63. Okpechi I, Swanepoel C, Duffield M, et al. Patterns of renal disease in Cape Town South Africa: a 10-year review of a single-centre renal biopsy database. *Nephrology Dialysis Transplantation* 2011;26(6):1853-61. doi: <http://dx.doi.org/10.1093/ndt/gfq655>
  64. Niang A, Cisse MM, Mahmoud SM, et al. Pilot experience in senegal with peritoneal dialysis for end-stage renal disease. *Peritoneal Dialysis International* 2014;34(5):539-43. doi: <http://dx.doi.org/10.3747/pdi.2011.00327>
  65. Buargub MA. 5-year mortality in hemodialysis patients: a single center study in Tripoli. *Saudi journal of kidney diseases and transplantation : an official publication of the Saudi Center for Organ Transplantation, Saudi Arabia* 2008;19(2):268-73. [published Online First: 2008/03/04]
  66. Chijioke A, Aderibigbe A, Olarenwaju TO, et al. Prevalence and pattern of cystic kidney diseases in Ilorin, Nigeria. *Saudi journal of kidney diseases and transplantation : an official publication of the Saudi Center for Organ Transplantation, Saudi Arabia* 2010;21(6):1172-8. [published Online First: 2010/11/10]
  67. Elsharif ME, Elsharif EG. Causes of end-stage renal disease in Sudan: a single-center experience. *Saudi journal of kidney diseases and transplantation : an official publication of the Saudi Center for Organ Transplantation, Saudi Arabia* 2011;22(2):373-6. [published Online First: 2011/03/23]
  68. Elkhatib M, Elnahed MS, Fadda S, et al. The change in the spectrum of glomerulonephritis in Egypt over the past

- decade. *Saudi journal of kidney diseases and transplantation : an official publication of the Saudi Center for Organ Transplantation, Saudi Arabia* 2012;23(5):1065-7. doi: 10.4103/1319-2442.100955 [published Online First: 2012/09/18]
69. Ibrahim S, Fayed A, Fadda S, et al. A five-year analysis of the incidence of glomerulonephritis at Cairo University Hospital-Egypt. *Saudi journal of kidney diseases and transplantation : an official publication of the Saudi Center for Organ Transplantation, Saudi Arabia* 2012;23(4):866-70. doi: 10.4103/1319-2442.98191 [published Online First: 2012/07/19]
70. Ayach G, El-Filali H, Saidi S, et al. Histopathological study of pure primary nephrotic syndrome in adolescents and young Moroccan adults. *Arab journal of nephrology and transplantation* 2011;4(3):137-40. [published Online First: 2011/10/27]
71. Ramilitiana B, Ranivoharisoa EM, Dodo M, et al. [A retrospective study on the incidence of chronic renal failure in the Department of Internal Medicine and Nephrology at University Hospital of Antananarivo (the capital city of Madagascar)]. *The Pan African medical journal* 2016;23:141. doi: 10.11604/pamj.2016.23.141.8874 [published Online First: 2016/06/10]
72. Zajjari Y, Benyahia M, Ibrahim DM, et al. La néphropathie non diabétique chez les patients diabétiques de type 2 à l'hôpital militaire Mohammed V de Rabat (Maroc). *EMHJ* 2012;18(6)
73. Fatiu A, Abubakr S, Muzamil H, et al. Undiagnosed hypertension and proteinuria in a market population in Ile-Ife, Nigeria. *Arab journal of nephrology and transplantation* 2011;4(3):141-6. [published Online First: 2011/10/27]
74. Traore M, Traore HA, Kardorff R, et al. The public health significance of urinary schistosomiasis as a cause of morbidity in two districts in Mali. *The American journal of tropical medicine and hygiene* 1998;59(3):407-13. [published Online First: 1998/09/28]
75. Sumaili EK, Nseka NM, Lepira FB, et al. Screening for proteinuria and chronic kidney disease risk factors in Kinshasa: a World Kidney Day 2007 study. *Nephron Clinical practice* 2008;110(4):c220-8. doi: 10.1159/000167869 [published Online First: 2008/11/01]
76. Egbi OG, Okafor UH, Miebodei KE, et al. Prevalence and correlates of chronic kidney disease among civil servants in Bayelsa state, Nigeria. *Nigerian journal of clinical practice* 2014;17(5):602-7. doi: <http://dx.doi.org/10.4103/1119-3077.141426>
77. Ayodele OE, Okunola OO, Afolabi MO, et al. Prevalence of hypertension, diabetes and chronic kidney disease in participants of the 2009 World Kidney Day screening exercise in Southwest Nigeria. *Hong Kong Journal of Nephrology* 2011;13(2):55-63.
78. Abu-Aisha H, Elhassan A, Khamis A, et al. Chronic kidney disease in police forces households in Khartoum, Sudan: pilot report. *Arab journal of nephrology and transplantation* 2009;2(2):21-26.
79. Cailhol J, Nkurunziza B, Izzedine H, et al. Prevalence of chronic kidney disease among people living with HIV/AIDS in Burundi: a cross-sectional study. *BMC nephrology* 2011;12:40. doi: <http://dx.doi.org/10.1186/1471-2369-12-40>
80. Wools-Kaloustian K, Gupta SK, Muloma E, et al. Renal disease in an antiretroviral-naïve HIV-infected outpatient population in Western Kenya. *Nephrology Dialysis Transplantation* 2007;22(8):2208-12.
81. Emem CP, Arogundade F, Sanusi A, et al. Renal disease in HIV-seropositive patients in Nigeria: an assessment of prevalence, clinical features and risk factors. *Nephrology, dialysis, transplantation : official publication of the European Dialysis and Transplant Association - European Renal Association* 2008;23(2):741-6. doi: 10.1093/ndt/gfm836 [published Online First: 2007/12/11]
82. Wyatt CM, Shi Q, Novak JE, et al. Prevalence of kidney disease in HIV-infected and uninfected Rwandan women. *PLoS ONE [Electronic Resource]* 2011;6(3):e18352. doi: <http://dx.doi.org/10.1371/journal.pone.0018352>
83. FolefackKaze F, Kengne AP, Pefura Yone EW, et al. Renal function, urinalysis abnormalities and correlates among HIV-infected Cameroonians naïve to antiretroviral therapy. *Saudi Journal of Kidney Diseases & Transplantation* 2013;24(6):1291-7. doi: <http://dx.doi.org/10.4103/1319-2442.121280>
84. Struik GM, den Exter RA, Munthali C, et al. The prevalence of renal impairment among adults with early HIV disease in Blantyre, Malawi. *International journal of STD & AIDS* 2011;22(8):457-62. doi: 10.1258/ijsa.2011.010521 [published Online First: 2011/07/29]
85. Msango L, Downs JA, Kalluvya SE, et al. Renal dysfunction among HIV-infected patients starting antiretroviral therapy. *AIDS (London, England)* 2011;25(11):1421-5. doi: <http://dx.doi.org/10.1097/QAD.0b013e328348a4b1>
86. Janmohamed MN, Kalluvya SE, Mueller A, et al. Prevalence of chronic kidney disease in diabetic adult out-patients in Tanzania. *BMC nephrology* 2013;14(1):183.
87. Wanjohi FW, Otieno FC, Ogola EN, et al. Nephropathy in patients with recently diagnosed type 2 diabetes mellitus in black Africans. *East African medical journal* 2002;79(8):399-404. [published Online First: 2003/03/18]
88. Choukem SP, Dzudie A, Dehayem M, et al. Comparison of different blood pressure indices for the prediction of prevalent diabetic nephropathy in a sub-Saharan African population with type 2 diabetes. *The Pan African medical journal* 2012;11:67. [published Online First: 2012/06/02]
89. Plange-Rhule J, Phillips R, Acheampong JW, et al. Hypertension and renal failure in Kumasi, Ghana. *Journal of human hypertension* 1999;13(1):37-40.

- 1  
2  
3  
4  
5  
6  
7  
8  
9  
10  
11  
12  
13  
14  
15  
16  
17  
18  
19  
20  
21  
22  
23  
24  
25  
26  
27  
28  
29  
30  
31  
32  
33  
34  
35  
36  
37  
38  
39  
40  
41  
42  
43  
44  
45  
46  
47  
48  
49  
50  
51  
52  
53  
54  
55  
56  
57  
58  
59  
60
90. Kalyesubula R, Nankabirwa JI, Ssinabulya I, et al. Kidney disease in Uganda: a community based study. *BMC nephrology* 2017;18(1):116. doi: 10.1186/s12882-017-0521-x [published Online First: 2017/04/05]
91. Kaze FF, Halle MP, Mopa HT, et al. Prevalence and risk factors of chronic kidney disease in urban adult Cameroonians according to three common estimators of the glomerular filtration rate: a cross-sectional study. *BMC nephrology* 2015;16:96. doi: 10.1186/s12882-015-0102-9 [published Online First: 2015/07/08]
92. Lunyera J, Stanifer JW, Ingabire P, et al. Prevalence and correlates of proteinuria in Kampala, Uganda: a cross-sectional pilot study. *BMC research notes* 2016;9:97. doi: 10.1186/s13104-016-1897-6 [published Online First: 2016/02/18]
93. Wachukwu CM, Emem-Chioma PC, Wokoma FS, et al. Prevalence of risk factors for chronic kidney disease among adults in a university community in southern Nigeria. *The Pan African medical journal* 2015;21:120. doi: 10.11604/pamj.2015.21.120.7079 [published Online First: 2015/09/04]
94. Odongo P, Wanyama R, Obol JH, et al. Impaired renal function and associated risk factors in newly diagnosed HIV-infected adults in Gulu Hospital, Northern Uganda. *BMC nephrology* 2015;16:43. doi: 10.1186/s12882-015-0035-3 [published Online First: 2015/04/17]
95. Feteh VF, Choukem SP, Kengne AP, et al. Anemia in type 2 diabetic patients and correlation with kidney function in a tertiary care sub-Saharan African hospital: a cross-sectional study. *BMC nephrology* 2016;17:29. doi: 10.1186/s12882-016-0247-1 [published Online First: 2016/03/21]
96. Pillay S, Aldous C, Mahomed F. A deadly combination - HIV and diabetes mellitus: Where are we now? *South African medical journal = Suid-Afrikaanse tydskrif vir geneeskunde* 2016;106(4):54. doi: 10.7196/SAMJ.2016.v106i4.9950 [published Online First: 2016/04/02]
97. Seck SM, Doupa D, Gueye L, et al. Chronic kidney disease epidemiology in northern Senegal: a cross-sectional study. *Iranian journal of kidney diseases* 2014;8(4):286-91.
98. Sumaili EK, Krzesinski JM, Zinga CV, et al. Prevalence of chronic kidney disease in Kinshasa: results of a pilot study from the Democratic Republic of Congo. *Nephrology Dialysis Transplantation* 2009;24(1):117-22. doi: <http://dx.doi.org/10.1093/ndt/gfn469>
99. Longo AL, Lepira FB, Sumaili EK, et al. Prevalence of low estimated glomerular filtration rate, proteinuria, and associated risk factors among HIV-infected black patients using Cockcroft-Gault and modification of diet in renal disease study equations. *Journal of Acquired Immune Deficiency Syndromes: JAIDS* 2012;59(1):59-64. doi: <http://dx.doi.org/10.1097/QAI.0b013e31823587b0>
100. Fana GT, Ndhlovu CE. Renal dysfunction among anti-retroviral therapy naive HIV infected patients in Zimbabwe. *The Central African journal of medicine* 2011;57(1-4):1-5. [published Online First: 2011/01/01]
101. Han TM, Naicker S, Ramdial PK, et al. A cross-sectional study of HIV-seropositive patients with varying degrees of proteinuria in South Africa. *Kidney international* 2006;69(12):2243-50.
102. Balogun WO, Abbiyesuku FM. Excess renal insufficiency among type 2 diabetic patients with dip-stick positive proteinuria in a tertiary hospital. *African journal of medicine and medical sciences* 2011;40(4):399-403. [published Online First: 2012/07/13]
103. Mafundikwa A, Ndhlovu CE, Gomo Z. The prevalence of diabetic nephropathy in adult patients with insulin dependent diabetes mellitus attending Parirenyatwa Diabetic Clinic, Harare. *The Central African journal of medicine* 2007;53(1-4):1-6. [published Online First: 2007/01/01]
104. Hamdouk M, Abdelraheem M, Taha A, et al. The association between prolonged occupational exposure to paraphenylenediamine (hair-dye) and renal impairment. *Arab journal of nephrology and transplantation* 2011;4(1):21-5. [published Online First: 2011/04/08]
105. Oluyombo R, Ayodele OE, Akinwusi PO, et al. A community study of the prevalence, risk factors and pattern of chronic kidney disease in osun state, South west Nigeria. *West African journal of medicine* 2013;32(2):85-92.
106. Prevalence of Chronic Kidney Disease and Associated Risk Factors: First Results from a Population Based Screening Program in Morocco(MAREMAR) [ASN abstract 353]; 2012. *J Am Soc Nephrol*.
107. Masimango MI, Sumaili EK, Jadoul M, et al. Prevalence of microalbuminuria and diagnostic value of dipstick proteinuria in outpatients from HIV clinics in Bukavu, the Democratic Republic of Congo. *BMC nephrology* 2014;15(1):146. doi: 10.1186/1471-2369-15-146 [published Online First: 2014/09/06]
108. Fabian J, Naicker S, Venter WD, et al. Urinary screening abnormalities in antiretroviral-naive HIV-infected outpatients and implications for management--a single-center study in South Africa. *Ethnicity & disease* 2009;19(1 Suppl 1):S1-80-5.
109. Sarfo FS, Keegan R, Appiah L, et al. High prevalence of renal dysfunction and association with risk of death amongst HIV-infected Ghanaians. *The Journal of infection* 2013;67(1):43-50. doi: 10.1016/j.jinf.2013.03.008 [published Online First: 2013/04/02]
110. Jao J, Palmer D, Leus I, et al. Prevalence and predictors of proteinuria in HIV-infected and uninfected pregnant women in Cameroon. *Nephrology, dialysis, transplantation : official publication of the European Dialysis and Transplant Association - European Renal Association* 2011;26(9):3051-3. doi: 10.1093/ndt/gfr310 [published Online First: 2011/07/02]
111. Makulo Jr R, Nseka MN, Jadoul M, et al. Albuminurie pathologique lors du dépistage du diabète en milieu semi-rural (cité de Kisantu en RD Congo). *Nephrologie & thérapeutique* 2010;6(6):513-19.
112. Kaze FF, Kengne AP, Magatsing CT, et al. Prevalence and Determinants of Chronic Kidney Disease Among

- Hypertensive Cameroonians According to Three Common Estimators of the Glomerular Filtration Rate. *Journal of clinical hypertension (Greenwich, Conn)* 2016;18(5):408-14. doi: 10.1111/jch.12781 [published Online First: 2016/01/23]
113. Ayokunle DS, Olusegun OT, Ademola A, et al. Prevalence of chronic kidney disease in newly diagnosed patients with Human immunodeficiency virus in Ilorin, Nigeria. *Jornal brasileiro de nefrologia : 'orgao oficial de Sociedades Brasileira e Latino-Americana de Nefrologia* 2015;37(2):177-84. doi: 10.5935/0101-2800.20150029 [published Online First: 2015/07/15]
114. Chadwick DR, Sarfo FS, Kirk ES, et al. Tenofovir is associated with increased tubular proteinuria and asymptomatic renal tubular dysfunction in Ghana. *BMC nephrology* 2015;16:195. doi: 10.1186/s12882-015-0192-4 [published Online First: 2015/12/03]
115. Glaser N, Phiri S, Bruckner T, et al. The prevalence of renal impairment in individuals seeking HIV testing in Urban Malawi. *BMC nephrology* 2016;17(1):186. doi: 10.1186/s12882-016-0403-7 [published Online First: 2016/11/24]
116. Pruijm MT, Madeleine G, Riesen WF, et al. Prevalence of microalbuminuria in the general population of Seychelles and strong association with diabetes and hypertension independent of renal markers. *Journal of hypertension* 2008;26(5):871-7. doi: <http://dx.doi.org/10.1097/HJH.0b013e3282f624d9>
117. Gouda Z, Mashaal G, Bello A, et al. Egypt information, prevention, and treatment of chronic kidney disease (EGIPT-CKD) programme: Prevalence and risk factors for microalbuminuria among the relatives of patients with CKD in Egypt. *Saudi Journal of Kidney Diseases and Transplantation* 2011;22(5):1055.
118. Attolou V, Bigot A, Ayivi B, et al. [Renal complications associated with human acquired immunodeficiency virus infection in a population of hospital patients at the Hospital and University National Center in Cotonou]. *Sante (Montrouge, France)* 1998;8(4):283-6. [published Online First: 1998/10/30]
119. Bouzid C, Smida H, Kacem A, et al. [Renal failure in Tunisian patients with type 2 diabetes: frequency and related factors]. *La Tunisie medicale* 2011;89(1):10-5. [published Online First: 2011/01/27]
120. Keeton GR, Smit R, Bryer A. Renal outcome of type 2 diabetes in South Africa--a 12-year follow-up study. *South African Medical Journal* 2004;94(9):771-5.
121. Bouaziz A, Zidi I, Zidi N, et al. Nephropathy following type 2 diabetes mellitus in Tunisian population. *The West Indian medical journal* 2012;61(9):881-9. [published Online First: 2013/09/12]
122. Katchunga P, Hermans MP, Manwa B, et al. [Hypertension, insulin resistance and chronic kidney disease in type 2 diabetes patients from South Kivu, DR Congo]. *Nephrologie et Therapeutique* 2010;6(6):520-5. doi: <http://dx.doi.org/10.1016/j.nephro.2010.04.002>
123. Djrolo F, Attolou VG, Avode DG, et al. [Diabetic nephropathy: an epidemiological study based on proteinuria in a population of black African diabetics in Cotonou, Benin]. *Sante (Montrouge, France)* 2001;11(2):105-9.
124. Lutale JJ, Thordarson H, Abbas ZG, et al. Microalbuminuria among type 1 and type 2 diabetic patients of African origin in Dar Es Salaam, Tanzania. *BMC nephrology* 2007;8(1):2.
125. Gill G, Gebrekidan A, English P, et al. Diabetic complications and glycaemic control in remote North Africa. *QJM : monthly journal of the Association of Physicians* 2008;101(10):793-98.
126. Osafo C, Mate-Kole M, Affram K, et al. Prevalence of chronic kidney disease in hypertensive patients in Ghana. *Renal failure* 2011;33(4):388-92. doi: <http://dx.doi.org/10.3109/0886022X.2011.565140>
127. Lengani A, Samadoulougou A, Cisse M. [Characteristics of renal disease in hypertensive morbidities in adults in Burkina Faso]. *Archives des maladies du coeur et des vaisseaux* 2000;93(8):1053-7.
128. Rayner B, Becker P. The prevalence of microalbuminuria and ECG left ventricular hypertrophy in hypertensive patients in private practices in South Africa. *Cardiovascular Journal of Southern Africa* 2006;17(5):245-9.
129. IA EL-S, Gadallah M, Shouman AE, et al. Subclinical nephrotoxicity caused by smoking and occupational silica exposure among Egyptian industrial workers. *Archives of medical research* 2003;34(5):415-21. doi: 10.1016/s0188-4409(03)00077-8 [published Online First: 2003/11/07]
130. Laurence EC, Volmink J, Esterhuizen TM, et al. Risk of cardiovascular disease among teachers in Cape Town: Findings of the South African PaCT pilot study. *South African medical journal = Suid-Afrikaanse tydskrif vir geneeskunde* 2016;106(10):996-1001. doi: 10.7196/SAMJ.2016.v106i10.10869 [published Online First: 2016/10/12]
131. Mogueo A, Echouffo-Tcheugui JB, Matsha TE, et al. Validation of two prediction models of undiagnosed chronic kidney disease in mixed-ancestry South Africans. *BMC nephrology* 2015;16:94. doi: 10.1186/s12882-015-0093-6 [published Online First: 2015/07/05]
132. Stanifer JW, Egger JR, Turner EL, et al. Neighborhood clustering of non-communicable diseases: results from a community-based study in Northern Tanzania. *BMC public health* 2016;16:226. doi: 10.1186/s12889-016-2912-5 [published Online First: 2016/03/06]
133. Stanifer JW, Maro V, Egger J, et al. The epidemiology of chronic kidney disease in Northern Tanzania: a population-based survey. *PloS one* 2015;10(4):e0124506. doi: 10.1371/journal.pone.0124506 [published Online First: 2015/04/18]
134. Stanifer JW, Turner EL, Egger JR, et al. Knowledge, Attitudes, and Practices Associated with Chronic Kidney Disease in Northern Tanzania: A Community-Based Study. *PloS one* 2016;11(6):e0156336. doi: 10.1371/journal.pone.0156336 [published Online First: 2016/06/10]



- 1  
2  
3  
4  
5  
6  
7  
8  
9  
10  
11  
12  
13  
14  
15  
16  
17  
18  
19  
20  
21  
22  
23  
24  
25  
26  
27  
28  
29  
30  
31  
32  
33  
34  
35  
36  
37  
38  
39  
40  
41  
42  
43  
44  
45  
46  
47  
48  
49  
50  
51  
52  
53  
54  
55  
56  
57  
58  
59  
60
135. Anyabolu EN, Chukwuonye, II, Arodiwe E, et al. Prevalence and predictors of chronic kidney disease in newly diagnosed human immunodeficiency virus patients in Owerri, Nigeria. *Indian journal of nephrology* 2016;26(1):10-5. doi: 10.4103/0971-4065.156115 [published Online First: 2016/03/05]
  136. Okafor UH, Unuigbo EI, Chukwuonye E. Prevalence and clinical and laboratory characteristics of kidney disease in anti-retroviral-naive human immunodeficiency virus-infected patients in South-South Nigeria. *Saudi journal of kidney diseases and transplantation : an official publication of the Saudi Center for Organ Transplantation, Saudi Arabia* 2016;27(1):129-34. doi: 10.4103/1319-2442.174155 [published Online First: 2016/01/21]
  137. Wensink GE, Schoffelen AF, Tempelman HA, et al. Albuminuria Is Associated with Traditional Cardiovascular Risk Factors and Viral Load in HIV-Infected Patients in Rural South Africa. *PLoS one* 2015;10(8):e0136529. doi: 10.1371/journal.pone.0136529 [published Online First: 2015/08/27]
  138. Eghan BA, Jr., Frempong MT, Adjei-Poku M. Prevalence and predictors of microalbuminuria in patients with diabetes mellitus: a cross-sectional observational study in Kumasi, Ghana. *Ethnicity & disease* 2007;17(4):726-30. [published Online First: 2007/12/13]
  139. Aryee C, Owiredu WK, Osei-Yeboah J, et al. An Analysis of Anthropometric Indicators and Modifiable Lifestyle Parameters Associated with Hypertensive Nephropathy. *International journal of hypertension* 2016;2016:6598921. doi: 10.1155/2016/6598921 [published Online First: 2016/10/25]
  140. Nabbaale J, Kibirige D, Ssekasanvu E, et al. Microalbuminuria and left ventricular hypertrophy among newly diagnosed black African hypertensive patients: a cross sectional study from a tertiary hospital in Uganda. *BMC research notes* 2015;8:198. doi: 10.1186/s13104-015-1156-2 [published Online First: 2015/05/15]
  141. Addo J, Smeeth L, Leon DA. Hypertensive target organ damage in Ghanaian civil servants with hypertension. *PLoS one* 2009;4(8):e6672. doi: 10.1371/journal.pone.0006672 [published Online First: 2009/08/25]
  142. Owiredu WK, Quayle L, Amidu N, et al. Renal insufficiency in Ghanaian HIV infected patients: need for dose adjustment. *African health sciences* 2013;13(1):101-11. doi: <http://dx.doi.org/10.4314/ahs.v13i1.14>
  143. Stöhr W, Reid A, Walker AS, et al. Glomerular dysfunction and associated risk factors over 4-5 years following antiretroviral therapy initiation in Africa. *Antiviral therapy* 2011;16(7):1011-20. doi: <http://dx.doi.org/10.3851/IMP1832>
  144. Stöhr W, Walker AS, Munderi P, et al. Estimating glomerular filtration rate in HIV-infected adults in Africa: comparison of Cockcroft-Gault and Modification of Diet in Renal Disease formulae. *Antiviral therapy* 2008;13(6):761-70. [published Online First: 2008/10/09]
  145. Reid A, Stöhr W, Walker AS, et al. Severe renal dysfunction and risk factors associated with renal impairment in HIV-infected adults in Africa initiating antiretroviral therapy. *Clinical Infectious Diseases* 2008;46(8):1271-81. doi: <http://dx.doi.org/10.1086/533468>
  146. Ekot MH, Courpotin C, Diafouka M, et al. [Prevalence and factors associated with renal disease among patients with newly diagnoses of HIV in Brazzaville, Republic of Congo]. *Medecine et sante tropicales* 2013;23(2):176-80. doi: 10.1684/mst.2013.0170 [published Online First: 2013/06/22]
  147. Peters PJ, Moore DM, Mermin J, et al. Antiretroviral therapy improves renal function among HIV-infected Ugandans. *Kidney international* 2008;74(7):925-9. doi: 10.1038/ki.2008.305 [published Online First: 2008/07/11]
  148. Peck R, Baisley K, Kavishe B, et al. Decreased renal function and associated factors in cities, towns and rural areas of Tanzania: a community-based population survey. *Tropical medicine & international health : TM & IH* 2016;21(3):393-404. doi: 10.1111/tmi.12651 [published Online First: 2015/12/09]
  149. Nsagha DS, Pokam BT, Assob JC, et al. HAART, DOTS and renal disease of patients co-infected with HIV/AIDS and TB in the South West Region of Cameroon. *BMC public health* 2015;15:1040. doi: 10.1186/s12889-015-2331-z [published Online First: 2015/10/11]
  150. Mekuria Y, Yilma D, Mekonnen Z, et al. Renal Function Impairment and Associated Factors among HAART Naive and Experienced Adult HIV Positive Individuals in Southwest Ethiopia: A Comparative Cross Sectional Study. *PLoS one* 2016;11(8):e0161180. doi: 10.1371/journal.pone.0161180 [published Online First: 2016/08/19]
  151. Adebamowo SN, Adeyemo AA, Tekola-Ayele F, et al. Impact of Type 2 Diabetes on Impaired Kidney Function in Sub-Saharan African Populations. *Frontiers in endocrinology* 2016;7:50. doi: 10.3389/fendo.2016.00050 [published Online First: 2016/06/16]
  152. Fiseha T, Kassim M, Yemane T. Chronic kidney disease and underdiagnosis of renal insufficiency among diabetic patients attending a hospital in Southern Ethiopia. *BMC nephrology* 2014;15:198. doi: 10.1186/1471-2369-15-198 [published Online First: 2014/12/17]
  153. Odenigbo C, Oguejiofor O, Onwubuya E, et al. The prevalence of chronic kidney disease in apparently healthy retired subjects in asaba, Nigeria. *Annals of medical and health sciences research* 2014;4(Suppl 2):S128-32. doi: 10.4103/2141-9248.138031
  154. Lucas GM, Clarke W, Kagaayi J, et al. Decreased kidney function in a community-based cohort of HIV-Infected and HIV-negative individuals in Rakai, Uganda. *Journal of Acquired Immune Deficiency Syndromes: JAIDS* 2010;55(4):491-4. doi: <http://dx.doi.org/10.1097/QAI.0b013e3181e8d5a8>
  155. Booyesen HL, Woodiwiss AJ, Raymond A, et al. Chronic kidney disease epidemiology collaboration-derived glomerular filtration rate performs better at detecting preclinical end-organ changes than alternative equations

- 1  
2  
3 in black Africans. *Journal of hypertension* 2016;34(6):1178-85. doi: 10.1097/hjh.0000000000000924  
4 [published Online First: 2016/04/02]
- 5 156. Seape T, Gounden V, van Deventer HE, et al. Cystatin C- and creatinine-based equations in the assessment of  
6 renal function in HIV-positive patients prior to commencing Highly Active Antiretroviral Therapy. *Annals of*  
7 *clinical biochemistry* 2016;53(Pt 1):58-66. doi: 10.1177/0004563215579695 [published Online First:  
8 2015/03/15]
- 9 157. Zachor H, Machekano R, Estrella MM, et al. Incidence of stage 3 chronic kidney disease and progression on  
10 tenofovir-based regimens. *AIDS (London, England)* 2016;30(8):1221-8. doi: 10.1097/qad.0000000000001041  
11 [published Online First: 2016/02/03]
- 12 158. Adedeji TA, Adedeji NO, Adebisi SA, et al. Prevalence and Pattern of Chronic Kidney Disease in Antiretroviral-  
13 Naive Patients with HIV/AIDS. *Journal of the International Association of Providers of AIDS Care*  
14 2015;14(5):434-40. doi: 10.1177/2325957415587570 [published Online First: 2015/05/28]
- 15 159. Matsha TE, Soita DJ, Hassan SM, et al. Deterioration, improvement of kidney function over time and determinants  
16 in the Cape Town Bellville South cohort. *Nephrology (Carlton, Vic)* 2014;19(10):638-47. doi:  
17 10.1111/nep.12313 [published Online First: 2014/07/22]
- 18 160. Jao J, Lo W, Toro PL, et al. Factors associated with decreased kidney function in HIV-infected adults enrolled in  
19 the MTCT-Plus Initiative in sub-Saharan Africa. *Journal of Acquired Immune Deficiency Syndromes: JAIDS*  
20 2011;57(1):40-5. doi: <http://dx.doi.org/10.1097/QAI.0b013e31821008eb>
- 21 161. Gupta SK, Ong'or WO, Shen C, et al. Reduced renal function is associated with progression to AIDS but not with  
22 overall mortality in HIV-infected Kenyan adults not initially requiring combination antiretroviral therapy.  
23 *Journal of the International AIDS Society* 2011;14:31. doi: 10.1186/1758-2652-14-31 [published Online First:  
24 2011/06/15]
- 25 162. Myer L, Kamkuemah M, Kaplan R, et al. Low prevalence of renal dysfunction in HIV-infected pregnant women:  
26 implications for guidelines for the prevention of mother-to-child transmission of HIV. *Tropical Medicine &*  
27 *International Health* 2013;18(11):1400-5. doi: <http://dx.doi.org/10.1111/tmi.12194>
- 28 163. Mulenga LB, Kruse G, Lakhi S, et al. Baseline renal insufficiency and risk of death among HIV-infected adults on  
29 antiretroviral therapy in Lusaka, Zambia. *AIDS (London, England)* 2008;22(14):1821-7. doi:  
30 10.1097/QAD.0b013e328307a051 [published Online First: 2008/08/30]
- 31 164. Ajayi S, Mamven M, Ojji D. eGFR and chronic kidney disease stages among newly diagnosed asymptomatic  
32 hypertensives and diabetics seen in a tertiary health center in Nigeria. *Ethnicity & disease* 2014;24(2):220-5.  
33 [published Online First: 2014/05/09]
- 34 165. Nwankwo EA, Nwankwo B, Mubi B. Prevalence of impaired kidney function in hospitalized hypertensive patients  
35 in Maiduguri, Nigeria. *The Internet Journal of Internal Medicine* 2006;6(1)
- 36 166. Edwards JK, Bygrave H, Van den Bergh R, et al. HIV with non-communicable diseases in primary care in Kibera,  
37 Nairobi, Kenya: characteristics and outcomes 2010-2013. *Transactions of the Royal Society of Tropical*  
38 *Medicine and Hygiene* 2015;109(7):440-6. doi: 10.1093/trstmh/trv038 [published Online First: 2015/05/23]
- 39 167. Kamkuemah M, Kaplan R, Bekker LG, et al. Renal impairment in HIV-infected patients initiating tenofovir-  
40 containing antiretroviral therapy regimens in a Primary Healthcare Setting in South Africa. *Tropical medicine*  
41 *& international health : TM & IH* 2015;20(4):518-26. doi: 10.1111/tmi.12446 [published Online First:  
42 2014/12/03]
- 43 168. Levey AS, Coresh J, Balk E, et al. National Kidney Foundation practice guidelines for chronic kidney disease:  
44 evaluation, classification, and stratification. *Annals of internal medicine* 2003;139(2):137-47.
- 45 169. Abdelsatir S, Al-Sofi A, Elamin S, et al. The potential role of nursing students in the implementation of  
46 community-based hypertension screening programs in Sudan. *Arab journal of nephrology and transplantation*  
47 2013;6(1):51-4. [published Online First: 2013/01/04]
- 48 170. Agaba EI, Agaba PA, Sirisena ND, et al. Renal disease in the acquired immunodeficiency syndrome in north  
49 central Nigeria. *Nigerian journal of medicine : journal of the National Association of Resident Doctors of*  
50 *Nigeria* 2003;12(3):120-5. [published Online First: 2004/01/24]
- 51 171. Coresh J, Astor BC, McQuillan G, et al. Calibration and random variation of the serum creatinine assay as critical  
52 elements of using equations to estimate glomerular filtration rate. *American journal of kidney diseases : the*  
53 *official journal of the National Kidney Foundation* 2002;39(5):920-9. doi: 10.1053/ajkd.2002.32765  
54 [published Online First: 2002/04/30]
- 55 172. Liu WS, Chung YT, Yang CY, et al. Serum creatinine determined by Jaffe, enzymatic method, and isotope  
56 dilution-liquid chromatography-mass spectrometry in patients under hemodialysis. *Journal of clinical*  
57 *laboratory analysis* 2012;26(3):206-14. doi: 10.1002/jcla.21495 [published Online First: 2012/05/26]
- 58 173. Drion I, Cobbaert C, Groenier KH, et al. Clinical evaluation of analytical variations in serum creatinine  
59 measurements: why laboratories should abandon Jaffe techniques. *BMC nephrology* 2012;13(1):133.
- 60 174. Bachmann LM, Nilsson G, Bruns DE, et al. State of the art for measurement of urine albumin: comparison of  
routine measurement procedures to isotope dilution tandem mass spectrometry. *Clinical chemistry*  
2014;60(3):471-80. doi: 10.1373/clinchem.2013.210302 [published Online First: 2013/11/28]
175. Levey AS, Stevens LA. Estimating GFR using the CKD epidemiology collaboration (CKD-EPI) creatinine  
equation: more accurate GFR estimates, lower CKD prevalence estimates, and better risk predictions.

- American journal of kidney diseases: the official journal of the National Kidney Foundation* 2010;55(4):622.
176. Hill NR, Fatoba ST, Oke JL, et al. Global Prevalence of Chronic Kidney Disease—A Systematic Review and Meta-Analysis. *PloS one* 2016;11(7):e0158765.
177. Saran R, Li Y, Robinson B, et al. US Renal Data System 2014 Annual Data Report: Epidemiology of Kidney Disease in the United States. *American journal of kidney diseases : the official journal of the National Kidney Foundation* 2015;66(1 Suppl 1):Svii, S1-305. doi: 10.1053/j.ajkd.2015.05.001 [published Online First: 2015/06/27]
178. Bruck K, Stel VS, Gambaro G, et al. CKD Prevalence Varies across the European General Population. *Journal of the American Society of Nephrology : JASN* 2016;27(7):2135-47. doi: 10.1681/asn.2015050542 [published Online First: 2015/12/25]
179. Ingsathit A, Thakkinstian A, Chaiprasert A, et al. Prevalence and risk factors of chronic kidney disease in the Thai adult population: Thai SEEK study. *Nephrology Dialysis Transplantation* 2010;25(5):1567-75.
180. Singh AK, Farag YM, Mittal BV, et al. Epidemiology and risk factors of chronic kidney disease in India - results from the SEEK (Screening and Early Evaluation of Kidney Disease) study. *BMC nephrology* 2013;14:114. doi: 10.1186/1471-2369-14-114 [published Online First: 2013/05/30]
181. Imai E, Horio M, Watanabe T, et al. Prevalence of chronic kidney disease in the Japanese general population. *Clinical and experimental nephrology* 2009;13(6):621-30. doi: 10.1007/s10157-009-0199-x [published Online First: 2009/06/11]
182. Hwang SJ, Tsai JC, Chen HC. Epidemiology, impact and preventive care of chronic kidney disease in Taiwan. *Nephrology (Carlton, Vic)* 2010;15 Suppl 2:3-9. doi: 10.1111/j.1440-1797.2010.01304.x [published Online First: 2010/07/09]
183. Lin B, Shao L, Luo Q, et al. Prevalence of chronic kidney disease and its association with metabolic diseases: a cross-sectional survey in Zhejiang province, Eastern China. *BMC nephrology* 2014;15:36. doi: 10.1186/1471-2369-15-36 [published Online First: 2014/02/25]
184. Tomonaga Y, Risch L, Szucs TD, et al. The Prevalence of Chronic Kidney Disease in a Primary Care Setting: A Swiss Cross-Sectional Study. *PloS one* 2013;8(7):e67848. doi: 10.1371/journal.pone.0067848
185. Jha V, Garcia-Garcia G, Iseki K, et al. Chronic kidney disease: global dimension and perspectives. *Lancet* 2013;382(9888):260-72. doi: 10.1016/s0140-6736(13)60687-x [published Online First: 2013/06/04]
186. Barsoum RS. Chronic kidney disease in the developing world. *The New England journal of medicine* 2006;354(10):997-9. doi: 10.1056/NEJMp058318 [published Online First: 2006/03/10]
187. UNAIDS. HIV and AIDS estimates (2015) 2015 [cited 2015. Available from: <http://www.unaids.org/en/regionscountries/countries/senegal> accessed July 15, 2015.
188. UNAIDS. HIV and AIDS estimates (2015): UNAIDS; 2015 [Available from: <http://www.unaids.org/en/regionscountries/countries/swaziland> accessed August 1, 2015
189. Matic S, Lazarus JV, Donoghoe MC. HIV/AIDS in Europe: moving from death sentence to chronic disease management: World Health Organization 2006.
190. Estrella M, Fine DM, Gallant JE, et al. HIV type 1 RNA level as a clinical indicator of renal pathology in HIV-infected patients. *Clinical infectious diseases : an official publication of the Infectious Diseases Society of America* 2006;43(3):377-80. doi: 10.1086/505497 [published Online First: 2006/06/29]
191. Deti EK, Thiebaut R, Bonnet F, et al. Prevalence and factors associated with renal impairment in HIV-infected patients, ANRS C03 Aquitaine Cohort, France. *HIV Med* 2010;11(5):308-17. doi: 10.1111/j.1468-1293.2009.00780.x [published Online First: 2009/12/17]
192. Fernando SK, Finkelstein FO, Moore BA, et al. Prevalence of chronic kidney disease in an urban HIV infected population. *American Journal of the Medical Sciences* 2008;335(2):89-94. doi: <http://dx.doi.org/10.1097/MAJ.0b013e31812e6b34>
193. Cao Y, Gong M, Han Y, et al. Prevalence and risk factors for chronic kidney disease among HIV-infected antiretroviral therapy-naïve patients in Mainland China: A multicenter cross-sectional study. *Nephrology* 2013;18(4):307-12. doi: 10.1111/nep.12031
194. Rustarazo SB, Fuente SR, de Miguel SC, et al. Prevalence and spectrum of chronic kidney disease in HIV-positive patients. *European Journal of Hospital Pharmacy: Science and Practice* 2012;19(2):96-97.
195. Menezes AM, Torelly J, Jr., Real L, et al. Prevalence and risk factors associated to chronic kidney disease in HIV-infected patients on HAART and undetectable viral load in Brazil. *PloS one* 2011;6(10):e26042. doi: 10.1371/journal.pone.0026042 [published Online First: 2011/10/25]
196. Sicotte M, Langlois ÉV, Aho J, et al. Association between nutritional status and the immune response in HIV+ patients under HAART: protocol for a systematic review. *Systematic reviews* 2014;3(1):9.
197. Taylor BS, Sobieszczyk ME, McCutchan FE, et al. The challenge of HIV-1 subtype diversity. *The New England journal of medicine* 2008;358(15):1590-602. doi: 10.1056/NEJMra0706737 [published Online First: 2008/04/12]
198. Wools-Kaloustian KK, Gupta SK. Will there be an epidemic of HIV-related chronic kidney disease in sub-Saharan Africa? Too soon to tell. *Kidney international* 2008;74(7):845-7. doi: 10.1038/ki.2008.326 [published Online First: 2008/09/17]

- 1  
2  
3 199. Pokroy-Shapira E, Gelernter I, Molad Y. Evolution of chronic kidney disease in patients with systemic lupus  
4 erythematosus over a long-period follow-up: a single-center inception cohort study. *Clinical rheumatology*  
5 2014;33(5):649-57.  
6 200. Mak A, Mok CC, Chu WP, et al. Renal damage in systemic lupus erythematosus: a comparative analysis of  
7 different age groups. *Lupus* 2007;16(1):28-34. [published Online First: 2007/02/08]  
8 201. Rabbani MA, Tahir MH, Siddiqui BK, et al. Renal involvement in systemic lupus erythematosus in Pakistan.  
9 *JPMA The Journal of the Pakistan Medical Association* 2005;55(8):328-32. [published Online First:  
10 2005/09/17]  
11 202. Chiu H-Y, Huang H-L, Li C-H, et al. Increased risk of chronic kidney disease in rheumatoid arthritis associated  
12 with cardiovascular complications—A National Population-Based Cohort Study. *PloS one*  
13 2015;10(9):e0136508.  
14 203. Barsoum RS. End-stage renal disease in North Africa. *Kidney international Supplement* 2003(83):S111-4. doi:  
15 10.1046/j.1523-1755.63.s83.23.x [published Online First: 2003/07/17]  
16 204. Naicker S. End-stage renal disease in Sub-Saharan Africa. *Kidney inter, Suppl* 2013;3(2):161-63. doi:  
17 10.1038/kisup.2013.4  
18 205. Naicker S. Challenges for nephrology practice in Sub-Saharan Africa. *Nephrology, dialysis, transplantation :*  
19 *official publication of the European Dialysis and Transplant Association - European Renal Association*  
20 2010;25(3):649-50. doi: 10.1093/ndt/gfp727  
21 206. Noubiap JJ, Naidoo J, Kengne AP. Diabetic nephropathy in Africa: A systematic review. *World journal of diabetes*  
22 2015;6(5):759-73. doi: 10.4239/wjd.v6.i5.759 [published Online First: 2015/06/13]  
23 207. Brook MO, Bottomley MJ, Mevada C, et al. Repeat testing is essential when estimating chronic kidney disease  
24 prevalence and associated cardiovascular risk. *QJM : monthly journal of the Association of Physicians*  
25 2012;105(3):247-55. doi: 10.1093/qjmed/hcr171 [published Online First: 2011/10/04]  
26  
27  
28  
29  
30  
31  
32  
33  
34  
35  
36  
37  
38  
39  
40  
41  
42  
43  
44  
45  
46  
47  
48  
49  
50  
51  
52  
53  
54  
55  
56  
57  
58  
59  
60

1  
2  
3  
4  
5  
6  
7  
8  
9  
10  
11  
12  
13  
14  
15  
16  
17  
18  
19  
20  
21  
22  
23  
24  
25  
26  
27  
28  
29  
30  
31  
32  
33  
34  
35  
36  
37  
38  
39  
40  
41  
42  
43  
44  
45  
46  
47  
48  
49  
50  
51  
52  
53  
54  
55  
56  
57  
58  
59  
60

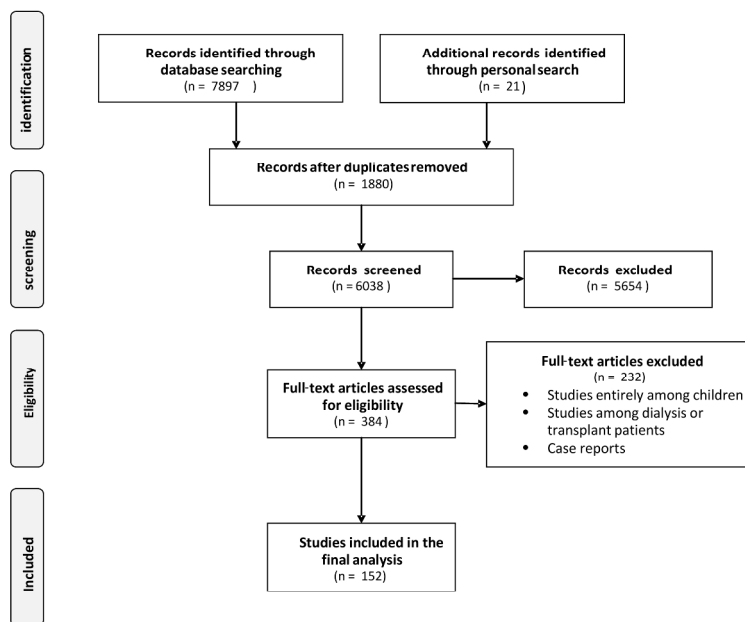

Fig 1

Fig1

254x190mm (300 x 300 DPI)

1  
2  
3  
4  
5  
6  
7  
8  
9  
10  
11  
12  
13  
14  
15  
16  
17  
18  
19  
20  
21  
22  
23  
24  
25  
26  
27  
28  
29  
30  
31  
32  
33  
34  
35  
36  
37  
38  
39  
40  
41  
42  
43  
44  
45  
46  
47  
48  
49  
50  
51  
52  
53  
54  
55  
56  
57  
58  
59  
60

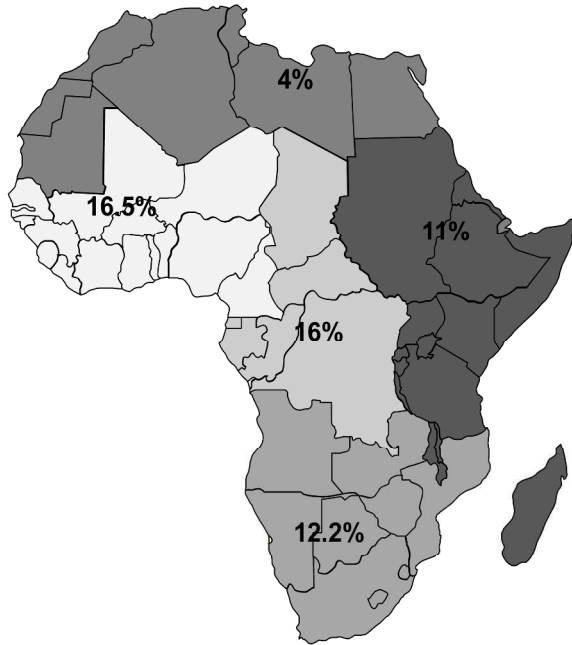

**Fig 2**

Fig2

254x190mm (300 x 300 DPI)

ew only

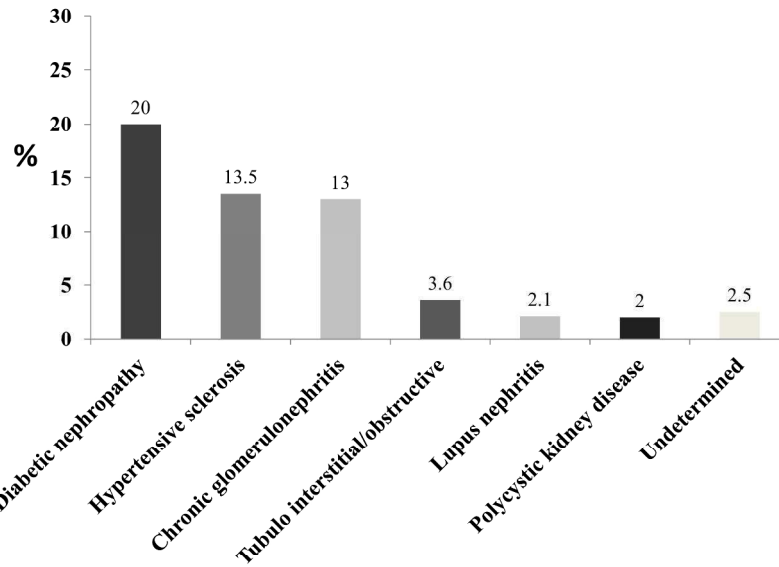

**Fig 3**

Fig3

254x190mm (300 x 300 DPI)

ew only

1  
2  
3  
4  
5  
6  
7  
8  
9  
10  
11  
12  
13  
14  
15  
16  
17  
18  
19  
20  
21  
22  
23  
24  
25  
26  
27  
28  
29  
30  
31  
32  
33  
34  
35  
36  
37  
38  
39  
40  
41  
42  
43  
44  
45  
46  
47  
48  
49  
50  
51  
52  
53  
54  
55  
56  
57  
58  
59  
60

**S1 Table.** Search strategy adopted in PubMed and Ovid MEDLINE

1. exp Renal Dialysis/
2. (hemodialysis or haemodialysis).tw.
3. (hemofiltration or haemofiltration).tw.
4. (hemodiafiltration or haemodiafiltration).tw.
5. dialysis.tw.
6. (CAPD or CCPD or APD).tw.
7. Renal Insufficiency/
8. Kidney Failure/
9. exp Renal Insufficiency, Chronic/
10. Kidney Diseases/
11. Uremia/
12. (end-stage renal or end-stage kidney or endstage renal or endstage kidney).tw.
13. (ESRF or ESKF or ESRD or ESKD).tw.
14. (chronic kidney or chronic renal).tw.
15. (CKF or CKD or CRF or CRD).tw.
16. (predialysis or pre-dialysis).tw.
17. ur?emi\$.tw.
18. 1 or 2 or 3 or 4 or 5 or 6 or 7 or 8 or 9 or 10 or 11 or 12 or 13 or 14 or 15 or 16 or 17
19. afric\$.ti,ab,kw,tw,mp.
20. 18 and 19



S2 Table: Studies among CKD patients

| Study ID                       | Year<br>Country<br>Region   | N    | Population Characteristic                                                                                                 | biopsy           | causes of<br>CKD                                                              |
|--------------------------------|-----------------------------|------|---------------------------------------------------------------------------------------------------------------------------|------------------|-------------------------------------------------------------------------------|
| El Khayat<br>S <sup>31</sup>   | 2013, Morocco, North        | 134  | Age( years): 54.4±18.1<br>Male gender: 58.65%                                                                             | no               | Tub.int: 9.7%<br>DN: 44%<br>H.scl: 11.2%<br>Ch.GN: 3.7%                       |
| Seck S <sup>32</sup>           | 2013, Senegal, West         | 60   | Age (years): 70.5±54.6<br>Male gender: 52%<br>Hypertension: 20%<br>SBP (mmHg): 167 ± 78<br>DBP (mmHg): 95 ± 55<br>DM: 18% | no               | DN: 25%<br>H.scl: 30%                                                         |
| Seck S <sup>33</sup>           | 2008, Senegal, West         | 118  | Age (years): 39.28±16.4<br>Male gender: 56%<br>SBP (mmHg): 160±15<br>DBP (mmHg): 90±15                                    | yes              | Tub.int: 12%<br>H.scl: 20%<br>Ch.GN: 35%                                      |
| Bourquia<br>A <sup>34</sup>    | 2002, Morocco, North        | 420  | Age (years): 46±3<br>Male gender: 52%                                                                                     | no               | PKD: 3%                                                                       |
| Ouattara<br>B <sup>35</sup>    | 2011, Ivory Coast,<br>West  | 301  | Age (years): 44±10<br>Male gender: 56%<br>Hypertension: 33.5%<br>DM: 12.3%                                                | no               | Tub.int:<br>10.3%<br>DN: 9.65%<br>Ch.GN: 17%<br>undetermined<br>: 29.2%       |
| Lengani<br>A <sup>36</sup>     | 1997, Burkina Faso,<br>West | 174  | Age (years): 36±15<br>Male gender: 63%<br>Hypertension: 64.9%                                                             | no               | Tub.int:<br>16.1%<br>Ch.GN:<br>42.5%<br>PKD: 16.1%<br>undetermined<br>: 14.4% |
| Afifi A <sup>37</sup>          | 2005, Egypt, North          | 220  | Not known                                                                                                                 | no               | DN: 28.2%<br>H.scl: 25.5%<br>obstructive:<br>5.9%                             |
| Diouf B <sup>38</sup>          | 2000, Senegal, West         | 261  | Age (years): 44(range:15-88)<br>Male gender: 46%                                                                          | no               | DN: 20.5%<br>H.scl:<br>34.23%<br>Ch.GN: 15%                                   |
| Niang A<br>39                  | 2008, Senegal, West         | 258  | Age (years): 28 (range:15-79)<br>Male gender: 75%<br>Hypertension: 12.2%                                                  | yes              | FSGS: 42%<br>Tub.int: 10%                                                     |
| Sabi K<br>A <sup>40</sup>      | 2011, Togo, West            | 398  | Age (years): mean: 42.6<br>Male gender: 57%                                                                               | not<br>know<br>n | Tub.int:<br>20.9%<br>Ch.GN:<br>40.2%                                          |
| Ulasi I <sup>41</sup>          | 2010, Nigeria, West         | 1538 | Age (years): 42.55±15.43<br>Male gender: 65%<br>Hypertension: 17.2%<br>DM: 11.8%                                          | yes              | FSGS: 40.5%<br>H.scl: 17.2%                                                   |
| AbdErrahi<br>m E <sup>42</sup> | 2001, Tunis, North          | 299  | Age (years): 38.3±14.6<br>Male gender: 69%                                                                                | no               | DN: 20.3%                                                                     |

|    |                                 |                     |      |                                                                                                                                                     |                                                                                                                   |
|----|---------------------------------|---------------------|------|-----------------------------------------------------------------------------------------------------------------------------------------------------|-------------------------------------------------------------------------------------------------------------------|
| 1  |                                 |                     |      |                                                                                                                                                     |                                                                                                                   |
| 2  |                                 |                     |      |                                                                                                                                                     |                                                                                                                   |
| 3  |                                 |                     |      |                                                                                                                                                     |                                                                                                                   |
| 4  |                                 |                     |      |                                                                                                                                                     |                                                                                                                   |
| 5  |                                 |                     |      |                                                                                                                                                     |                                                                                                                   |
| 6  |                                 |                     |      |                                                                                                                                                     |                                                                                                                   |
| 7  |                                 |                     |      |                                                                                                                                                     |                                                                                                                   |
| 8  | Abdou<br>N <sup>43</sup>        | 2003, Senegal, West | 115  | Age (years): 28 (IQR:5-60)<br>Male gender: 56%                                                                                                      | yes<br>FSGS: 67%<br>MGN: 12.5%<br>DN: 23.5%<br>SLE: 55%<br>undetermined<br>: 7%                                   |
| 9  | Afifi A <sup>44</sup>           | 2004, Egypt, North  | 3172 | Age (years): 56.5±29.2                                                                                                                              | yes<br>DN: 14.5%                                                                                                  |
| 10 |                                 |                     |      |                                                                                                                                                     |                                                                                                                   |
| 11 |                                 |                     |      |                                                                                                                                                     |                                                                                                                   |
| 12 |                                 |                     |      |                                                                                                                                                     |                                                                                                                   |
| 13 |                                 |                     |      |                                                                                                                                                     |                                                                                                                   |
| 14 |                                 |                     |      |                                                                                                                                                     |                                                                                                                   |
| 15 |                                 |                     |      |                                                                                                                                                     |                                                                                                                   |
| 16 |                                 |                     |      |                                                                                                                                                     |                                                                                                                   |
| 17 | Afifi A <sup>45</sup>           | 1999, Egypt, North  | 4905 | Age (years): 45.6±14.2<br>Male gender: 62.4%                                                                                                        | yes<br>DN: 8.9%<br>H.scl: 28%<br>obstructive:<br>15%<br>PKD: 3%<br>undetermined<br>: 16.2%                        |
| 18 |                                 |                     |      |                                                                                                                                                     |                                                                                                                   |
| 19 | Agaba<br>EI <sup>46</sup>       | 2009, Nigeria, West | 130  | Age (years): 41±16<br>Male gender: 68%                                                                                                              | no<br>DN: 17.5%<br>H.scl: 29.7%<br>Ch.GN:<br>45.6%                                                                |
| 20 |                                 |                     |      |                                                                                                                                                     |                                                                                                                   |
| 21 |                                 |                     |      |                                                                                                                                                     |                                                                                                                   |
| 22 |                                 |                     |      |                                                                                                                                                     |                                                                                                                   |
| 23 | Alashek<br>W <sup>47</sup>      | 2012, Libya, North  | 2417 | Age (years): 49 (range: 36-61)<br>Male gender: 58%                                                                                                  | no<br>DN: 13.3%<br>H.scl: 26.1%<br>Ch.GN:<br>41.2%                                                                |
| 24 |                                 |                     |      |                                                                                                                                                     |                                                                                                                   |
| 25 |                                 |                     |      |                                                                                                                                                     |                                                                                                                   |
| 26 |                                 |                     |      |                                                                                                                                                     |                                                                                                                   |
| 27 |                                 |                     |      |                                                                                                                                                     |                                                                                                                   |
| 28 |                                 |                     |      |                                                                                                                                                     |                                                                                                                   |
| 29 |                                 |                     |      |                                                                                                                                                     |                                                                                                                   |
| 30 |                                 |                     |      |                                                                                                                                                     |                                                                                                                   |
| 31 |                                 |                     |      |                                                                                                                                                     |                                                                                                                   |
| 32 |                                 |                     |      |                                                                                                                                                     |                                                                                                                   |
| 33 | Alasia<br>D <sup>48</sup>       | 2012, Nigeria, West | 320  | Age (years): 46.2±17.6<br>Male gender: 63%<br>SBP (mmHg): 171.2±31.9<br>DBP(mmHg): 102.5±27.4                                                       | yes<br>DN: 13.4%<br>H.scl: 42.8%<br>obstructive:<br>14.9%<br>SLE: 1%<br>Ch.GN:<br>15.9%<br>undetermined<br>: 9.5% |
| 34 |                                 |                     |      |                                                                                                                                                     |                                                                                                                   |
| 35 |                                 |                     |      |                                                                                                                                                     |                                                                                                                   |
| 36 |                                 |                     |      |                                                                                                                                                     |                                                                                                                   |
| 37 |                                 |                     |      |                                                                                                                                                     |                                                                                                                   |
| 38 |                                 |                     |      |                                                                                                                                                     |                                                                                                                   |
| 39 |                                 |                     |      |                                                                                                                                                     |                                                                                                                   |
| 40 | Alebiosu<br>C O <sup>49</sup>   | 2006, Nigeria, West | 153  | Age (years): 39.6±14.8<br>Male gender: 59%<br>Hypertension: 38.5%<br>SBP (mmHg): 167.3±15.5<br>DBP (mmHg): 106±28.9<br>DM: 13.1%                    | no<br>Tub.int: 2.2%<br>H.scl: 31.1%<br>Ch.GN:<br>43.7%                                                            |
| 41 |                                 |                     |      |                                                                                                                                                     |                                                                                                                   |
| 42 |                                 |                     |      |                                                                                                                                                     |                                                                                                                   |
| 43 | Amira<br>CO <sup>50</sup>       | 2012, Nigeria, West | 201  | Age (years): 47.5±15.7<br>Male gender: 56.2<br>Hypertension: 42.8%<br>DM: 13.4%                                                                     | no<br>DN: 16.1%<br>H.scl: 7.6%<br>Ch.GN: 1.8%<br>PKD: 2.9%                                                        |
| 44 |                                 |                     |      |                                                                                                                                                     |                                                                                                                   |
| 45 |                                 |                     |      |                                                                                                                                                     |                                                                                                                   |
| 46 |                                 |                     |      |                                                                                                                                                     |                                                                                                                   |
| 47 |                                 |                     |      |                                                                                                                                                     |                                                                                                                   |
| 48 | Arogunda<br>de FA <sup>51</sup> | 2011, Nigeria, West | 760  | Age(years): 36 (range:15-90)<br>Male gender: 70.3%<br>Hypertension: 72.4%<br>SBP (mmHg): 160 (range:120 – 270)<br>DBP (mmHg): 100 (range:50 – 209 ) | no<br>FSGS: 79.2%                                                                                                 |
| 49 |                                 |                     |      |                                                                                                                                                     |                                                                                                                   |
| 50 |                                 |                     |      |                                                                                                                                                     |                                                                                                                   |
| 51 | Counil<br>É <sup>52</sup>       | 2008, Tunis, North  | 6397 | Age (years): 51.4±18.0<br>Male gender: 56.5%                                                                                                        | no<br>DN: 14.7%<br>H.scl: 52.8%<br>PKD: 17.2%                                                                     |
| 52 |                                 |                     |      |                                                                                                                                                     |                                                                                                                   |
| 53 |                                 |                     |      |                                                                                                                                                     |                                                                                                                   |
| 54 |                                 |                     |      |                                                                                                                                                     |                                                                                                                   |
| 55 |                                 |                     |      |                                                                                                                                                     |                                                                                                                   |
| 56 | Chijioke<br>A <sup>53</sup>     | 2012, Nigeria, West | 116  | Age (years): Male: 50.89±13.43 and Female:<br>48.22±14.70<br>Male gender: 61.2%<br>SBP(mmHg): 153.41±27.12<br>DBP (mmHg): 93.92±17.19               | no<br>Tub.int:<br>17.1%<br>Ch.GN: 36%                                                                             |
| 57 |                                 |                     |      |                                                                                                                                                     |                                                                                                                   |
| 58 | Madala                          | 2014, South Africa, | 302  | Age (years): 47.1±17.0                                                                                                                              | yes<br>PKD: 1.8%                                                                                                  |
| 59 |                                 |                     |      |                                                                                                                                                     |                                                                                                                   |
| 60 |                                 |                     |      |                                                                                                                                                     |                                                                                                                   |

|                             |                           |      |                                                                                                                                                                           |     |                                                                                   |
|-----------------------------|---------------------------|------|---------------------------------------------------------------------------------------------------------------------------------------------------------------------------|-----|-----------------------------------------------------------------------------------|
| ND <sup>54</sup>            | South                     |      | Male gender: 45%<br>SBP (mmHg): (male) 144.6 ± 28.3.<br>(female) 141.1 ± 25.5<br>DBP (mmHg): (male) 84.2 ± 18.1.<br>(female) 81.0 ± 19.0                                  |     |                                                                                   |
| Okpechi IG <sup>55</sup>    | 2013, South Africa, South | 111  | Age (years): 66.3 ± 5.7<br>Male gender: 47.7%<br>Hypertension: 71%<br>DM: 19.8%                                                                                           | yes | DN: 22.2%<br>H.scl: 38.8%<br>Ch.GN: 28.8%<br>PKD: 2.7%                            |
| Laleye A <sup>56</sup>      | 2012, Benin, West         | 3783 | Age (years): 47.2 (range: 29 - 70 )<br>Male gender: 24%<br>Hypertension: 59%                                                                                              | no  | DN: 12.5%<br>H.scl: 45%<br>obstructive: 12.5%<br>Ch.GN: 15.8%<br>PKD: 3.3%        |
| Okunola Y <sup>57</sup>     | 2013, Nigeria, West       | 300  | Age (years): 49 ± 16.25<br>Male gender: 68%                                                                                                                               | no  | Ch.GN: 58%                                                                        |
| Bello BT <sup>58</sup>      | 2013, Nigeria, West       | 120  | Age (years): 47 + 14<br>Male gender: 60%<br>SBP (mmHg): 162 ± 32<br>DBP (mmHg): 94.9 ± 19.6                                                                               | yes | Tub.int: 8.8%<br>DN: 7.4%<br>H.scl: 34.2%<br>Ch.GN: 39.2%<br>undetermined : 3.45% |
| El-Minshawy O <sup>59</sup> | 2011, Egypt, North        | 800  | Age (years): 46 ± 13<br>Male gender: 65%                                                                                                                                  | no  | DN: 11.5%<br>H.scl: 34.6%<br>Ch.GN: 39%<br>PKD: 6.9%<br>undetermined : 7.5%       |
| Okpechi IG <sup>60</sup>    | 2010, South Africa, South | 294  | Age (years): 33.9 ± 12.0<br>Male gender: 45.2%<br>Hypertension: 39.8%                                                                                                     | yes | Tub.int: 1.2%<br>DN: 26.5%<br>H.scl: 14.6%<br>obstructive: 5%<br>Ch.GN: 21.2%     |
| Madala N <sup>61</sup>      | 2012, South Africa, South | 148  | Age (years): 41.4 ± 13.1<br>Male gender: 37.2%<br>SBP (mmHg): African (133.6 ± 20.2). Indian (130.1 ± 20.6)<br>DBP (mmHg): African: (133.6 ± 20.2). Indian (130.1 ± 20.6) | no  | DN: 41.5%<br>H.scl: 14.6%<br>Ch.GN: 16%<br>undetermined : 15.55%                  |
| El Farouki M <sup>62</sup>  | 2013, Morocco, North      | 207  | Age (years): 52.43 ± 15.48<br>Male gender: 64.3%<br>Hypertension: 73.9%<br>DM: 41.5%                                                                                      | no  | FSGS: 10.5%<br>MGN: 35%<br>H.scl: 18%<br>SLE: 39%                                 |
| Okpechi I <sup>63</sup>     | 2011, South Africa, South | 1284 | Age (years): 36.8 ± 14.0 years<br>Male gender: 45.2%                                                                                                                      | yes | DN: 19.4%<br>H.scl: 40%<br>Ch.GN: 21%                                             |
| Niang A <sup>64</sup>       | 2014, Senegal, West       | 62   | Age (years): 47 ± 13 years<br>Male gender: 55%                                                                                                                            | no  | DN: 27.5%<br>H.scl: 10.5%<br>Ch.GN: 8%                                            |

|                              |                        |     |                                                                                    |     |                                                                    |
|------------------------------|------------------------|-----|------------------------------------------------------------------------------------|-----|--------------------------------------------------------------------|
| Buargub M <sup>65</sup>      | 2008, Libya, North     | 124 | Age (years): 47.4±15<br>Male gender: 62%                                           | no  | PKD: 30%                                                           |
| Chijioke A <sup>66</sup>     | 2010, Nigeria, West    | 67  | Age (years): 47.4 ± 16.2<br>Male gender: 57%                                       | no  | H.scl: 20%<br>obstructive: 15%<br>Ch.GN: 11%<br>undetermined : 27% |
| Elsharif M <sup>67</sup>     | 2011, Sudan, East      | 224 | Age (years): 45.78± 17.16<br>Male gender: 67.8%                                    | yes | H.scl: 14.3%<br>obstructive: 11.6%<br>ndetermined: 53.5%           |
| Elkhatib <sup>68</sup>       | 2012, Egypt, North     | 437 | Age (years): 89% <50 years. 8.5% 50–60 years and 3% > 50 years<br>Male gender: 52% | yes | FSGS: 6.8%<br>MGN: 10.9%<br>SLE: 24.7%                             |
| Ibrahim S <sup>69</sup>      | 2012, Egypt, North     | 924 | Age (years): 26.5 ± 14.6 years<br>Male gender: 47%                                 | yes | FSGS: 20.2%<br>MGN: 10.5%<br>SLE: 8.6%                             |
| Ayach G <sup>70</sup>        | 2011, Morocco, North   | 386 | Age (years): 19 (IQR:12-25)<br>Male gender: 61%                                    | yes | Tub.int: 5.6%<br>DN: 29.8%<br>H.scl: 77.8%<br>Ch.GN: 35%           |
| Ramilitian a B <sup>71</sup> | 2016, Madagascar, East | 239 | Age (years): 45.5( range: 16-82)<br>Male gender: 40%<br>Diabetes mellitus: 12.6%   | No  | Tub.int: 10.46%<br>Ch.GN: 40.1%<br>DN:12.6%<br>H.Scl: 35.6%        |
| Zajjari Y <sup>72</sup>      | 2012, Morocco, North   | 16  | Age (years): 60 (47-79)<br>Male gender: 81.3%<br>Hypertension: 56.3%               | Yes | DN: 25%                                                            |

Tub. Int: tubulo-interstitial, DN: diabetic nephropathy, H Scl: hypertensive sclerosis, ch GN: chronic glomerulonephritis, PKD: polycystic kidney disease, DM: diabetes mellitus

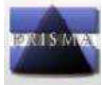

# PRISMA 2009 Checklist

| Section/topic                      | #  | Checklist item                                                                                                                                                                                                                                                                                              | Reported on page #       |
|------------------------------------|----|-------------------------------------------------------------------------------------------------------------------------------------------------------------------------------------------------------------------------------------------------------------------------------------------------------------|--------------------------|
| <b>TITLE</b>                       |    |                                                                                                                                                                                                                                                                                                             |                          |
| Title                              | 1  | Identify the report as a systematic review, meta-analysis, or both.                                                                                                                                                                                                                                         | 1                        |
| <b>ABSTRACT</b>                    |    |                                                                                                                                                                                                                                                                                                             |                          |
| Structured summary                 | 2  | Provide a structured summary including, as applicable: background; objectives; data sources; study eligibility criteria, participants, and interventions; study appraisal and synthesis methods; results; limitations; conclusions and implications of key findings; systematic review registration number. | 2                        |
| <b>INTRODUCTION</b>                |    |                                                                                                                                                                                                                                                                                                             |                          |
| Rationale                          | 3  | Describe the rationale for the review in the context of what is already known.                                                                                                                                                                                                                              | 3,4                      |
| Objectives                         | 4  | Provide an explicit statement of questions being addressed with reference to participants, interventions, comparisons, outcomes, and study design (PICOS).                                                                                                                                                  | 4                        |
| <b>METHODS</b>                     |    |                                                                                                                                                                                                                                                                                                             |                          |
| Protocol and registration          | 5  | Indicate if a review protocol exists, if and where it can be accessed (e.g., Web address), and, if available, provide registration information including registration number.                                                                                                                               | N/A                      |
| Eligibility criteria               | 6  | Specify study characteristics (e.g., PICOS, length of follow-up) and report characteristics (e.g., years considered, language, publication status) used as criteria for eligibility, giving rationale.                                                                                                      | 4,5                      |
| Information sources                | 7  | Describe all information sources (e.g., databases with dates of coverage, contact with study authors to identify additional studies) in the search and date last searched.                                                                                                                                  | 4,5                      |
| Search                             | 8  | Present full electronic search strategy for at least one database, including any limits used, such that it could be repeated.                                                                                                                                                                               | 4, supplementary table 1 |
| Study selection                    | 9  | State the process for selecting studies (i.e., screening, eligibility, included in systematic review, and, if applicable, included in the meta-analysis).                                                                                                                                                   | 4,5                      |
| Data collection process            | 10 | Describe method of data extraction from reports (e.g., piloted forms, independently, in duplicate) and any processes for obtaining and confirming data from investigators.                                                                                                                                  | 4,5                      |
| Data items                         | 11 | List and define all variables for which data were sought (e.g., PICOS, funding sources) and any assumptions and simplifications made.                                                                                                                                                                       | 4,5                      |
| Risk of bias in individual studies | 12 | Describe methods used for assessing risk of bias of individual studies (including specification of whether this was done at the study or outcome level), and how this information is to be used in any data synthesis.                                                                                      | 5,6                      |
| Summary measures                   | 13 | State the principal summary measures (e.g., risk ratio, difference in means).                                                                                                                                                                                                                               | 6                        |

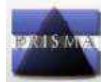

# PRISMA 2009 Checklist

|                      |    |                                                                                                                                                           |   |
|----------------------|----|-----------------------------------------------------------------------------------------------------------------------------------------------------------|---|
| Synthesis of results | 14 | Describe the methods of handling data and combining results of studies, if done, including measures of consistency (e.g., $I^2$ ) for each meta-analysis. | 6 |
|----------------------|----|-----------------------------------------------------------------------------------------------------------------------------------------------------------|---|

Page 1 of 2

| Section/topic               | #  | Checklist item                                                                                                                                   | Reported on page # |
|-----------------------------|----|--------------------------------------------------------------------------------------------------------------------------------------------------|--------------------|
| Risk of bias across studies | 15 | Specify any assessment of risk of bias that may affect the cumulative evidence (e.g., publication bias, selective reporting within studies).     | 6                  |
| Additional analyses         | 16 | Describe methods of additional analyses (e.g., sensitivity or subgroup analyses, meta-regression), if done, indicating which were pre-specified. | 6                  |

## RESULTS

|                               |    |                                                                                                                                                                                                          |                                                       |
|-------------------------------|----|----------------------------------------------------------------------------------------------------------------------------------------------------------------------------------------------------------|-------------------------------------------------------|
| Study selection               | 17 | Give numbers of studies screened, assessed for eligibility, and included in the review, with reasons for exclusions at each stage, ideally with a flow diagram.                                          | 6,7,17,<br>Fig.1                                      |
| Study characteristics         | 18 | For each study, present characteristics for which data were extracted (e.g., study size, PICOS, follow-up period) and provide the citations.                                                             | Tables( 2-4,<br>supplementary<br>table 2) P:19-<br>51 |
| Risk of bias within studies   | 19 | Present data on risk of bias of each study and, if available, any outcome level assessment (see item 12).                                                                                                | Tables( 2-4,<br>supplementary<br>table 2) P:19-<br>51 |
| Results of individual studies | 20 | For all outcomes considered (benefits or harms), present, for each study: (a) simple summary data for each intervention group (b) effect estimates and confidence intervals, ideally with a forest plot. | 6-11,<br>18-51                                        |
| Synthesis of results          | 21 | Present results of each meta-analysis done, including confidence intervals and measures of consistency.                                                                                                  | N/A                                                   |
| Risk of bias across studies   | 22 | Present results of any assessment of risk of bias across studies (see Item 15).                                                                                                                          | Tables 2,3<br>and 4, P: 19-<br>51                     |
| Additional analysis           | 23 | Give results of additional analyses, if done (e.g., sensitivity or subgroup analyses, meta-regression [see Item 16]).                                                                                    | N/A                                                   |

## DISCUSSION

|                     |    |                                                                                                                                                                                                                                                                                   |           |
|---------------------|----|-----------------------------------------------------------------------------------------------------------------------------------------------------------------------------------------------------------------------------------------------------------------------------------|-----------|
| Summary of evidence | 24 | Summarize the main findings including the strength of evidence for each main outcome; consider their relevance to key groups (e.g., healthcare providers, users, and policy makers).                                                                                              | 11        |
| Limitations         | 25 | Discuss limitations at study and outcome level (e.g., risk of bias), and at review-level (e.g., incomplete retrieval of identified research, reporting bias). <a href="http://bmjopen.bmj.com/site/about/guidelines.xhtml">http://bmjopen.bmj.com/site/about/guidelines.xhtml</a> | 12,14, 15 |

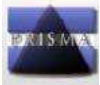

# PRISMA 2009 Checklist

1  
2  
3  
4  
5  
6  
7  
8  
9  
10  
11  
12  
13  
14  
15  
16  
17  
18  
19  
20  
21  
22  
23  
24  
25  
26  
27  
28  
29  
30  
31  
32  
33  
34  
35  
36  
37  
38  
39  
40  
41  
42  
43  
44  
45  
46  
47  
48  
49

|                |    |                                                                                                                                            |    |
|----------------|----|--------------------------------------------------------------------------------------------------------------------------------------------|----|
| Conclusions    | 26 | Provide a general interpretation of the results in the context of other evidence, and implications for future research.                    | 16 |
| <b>FUNDING</b> |    |                                                                                                                                            |    |
| Funding        | 27 | Describe sources of funding for the systematic review and other support (e.g., supply of data); role of funders for the systematic review. | 54 |

From: Moher D, Liberati A, Tetzlaff J, Altman DG, The PRISMA Group (2009). Preferred Reporting Items for Systematic Reviews and Meta-Analyses: The PRISMA Statement. PLoS Med 6(7): e1000097. doi:10.1371/journal.pmed1000097

For more information, visit: [www.prisma-statement.org](http://www.prisma-statement.org).

Page 2 of 2

# BMJ Open

## CHRONIC KIDNEY DISEASE IN AFRICA: A SYSTEMATIC REVIEW

|                                 |                                                                                                                                                                                                                                                                                                                                                                                                                                                                                                                                                                                                            |
|---------------------------------|------------------------------------------------------------------------------------------------------------------------------------------------------------------------------------------------------------------------------------------------------------------------------------------------------------------------------------------------------------------------------------------------------------------------------------------------------------------------------------------------------------------------------------------------------------------------------------------------------------|
| Journal:                        | <i>BMJ Open</i>                                                                                                                                                                                                                                                                                                                                                                                                                                                                                                                                                                                            |
| Manuscript ID                   | bmjopen-2016-015069.R2                                                                                                                                                                                                                                                                                                                                                                                                                                                                                                                                                                                     |
| Article Type:                   | Research                                                                                                                                                                                                                                                                                                                                                                                                                                                                                                                                                                                                   |
| Date Submitted by the Author:   | 01-Jun-2017                                                                                                                                                                                                                                                                                                                                                                                                                                                                                                                                                                                                |
| Complete List of Authors:       | Abd ElHafeez, Samar; Alexandria University High Institute of Public Health, Epidemiology<br>Bologna, Davide; CNR-IFC, Clinical Epidemiology of Renal Diseases and Hypertension, Reggio Cal Unit<br>D'Arrigo, Graziella; CNR-IFC, Clinical Epidemiology of Renal Diseases and Hypertension, Reggio Cal Unit<br>Dounousi, Evangelia; University of Ioannina School of Medicine, Nephrology<br>Tripepi, Giovanni; CNR-IFC, Clinical Epidemiology of Renal Diseases and Hypertension, Reggio Cal Unit<br>Zoccali, Carmine; CNR-IFC, Clinical Epidemiology of Renal Diseases and Hypertension, Reggio Cal Unit; |
| <b>Primary Subject Heading</b>: | Epidemiology                                                                                                                                                                                                                                                                                                                                                                                                                                                                                                                                                                                               |
| Secondary Subject Heading:      | Renal medicine, Research methods                                                                                                                                                                                                                                                                                                                                                                                                                                                                                                                                                                           |
| Keywords:                       | CKD, Africa, Systematic review                                                                                                                                                                                                                                                                                                                                                                                                                                                                                                                                                                             |
|                                 |                                                                                                                                                                                                                                                                                                                                                                                                                                                                                                                                                                                                            |

SCHOLARONE™  
Manuscripts

only



1  
2  
3 1 **TITLE PAGE**4 2  
5 3 **CHRONIC KIDNEY DISEASE IN AFRICA: A SYSTEMATIC REVIEW**6 4  
7 5 *Samar Abd ElHafeez<sup>1</sup> Dr.PH, Davide Bolignano<sup>2</sup> MD; Graziella D'Arrigo<sup>2</sup>, Ph.D; Evangelia Dounousi<sup>3</sup>,Ph.D;*  
8 6 *Giovanni Tripepi<sup>2</sup>, Ph.D; Carmine Zoccali<sup>2</sup>, FASN, FNKF, FERA*9 7  
10 8 <sup>1</sup>*High Institute of Public Health - Alexandria University, Epidemiology, Alexandria, EGYPT*11 9 <sup>2</sup>*CNR/IFC, Clin. Epid. and Physiopath. of Renal Dis. and Hypert., Reggio Calabria, ITALY*12 10 <sup>3</sup>*Department of Nephrology, School of Health Sciences - University of Ioannina, Ioannina, GREECE*13 11  
14 12 Correspondence:

15 13 Prof. Carmine Zoccali

16 14 CNR Clinical Epidemiology and Physiopathology of Renal Diseases and Hypertension of Reggio  
17 15 Calabria, c/o Nefrologia e CNR Ospedali Riuniti 89124 Reggio Cal, ITALY

18 16 Email: carmine.zoccali@tin.it

19 17 FAX 0039.0965.26879

20 18 **Word count:**21 19 **Abstract: 300**22 20 **Body of the manuscript: 4871**23 21 **Keywords:** CKD, Africa, systematic review  
24 22  
25 23  
26 24  
27 25  
28 26  
29 27  
30 28  
31 29  
32 30  
33 31  
34 32  
35 33  
36 34  
37 35  
38 36  
39 37  
40 38  
41 39  
42 40  
43 41  
44 42  
45 43  
46 44  
47 45  
48 46  
49 47  
50 48  
51 49  
52 50  
53 51  
54 52  
55 53  
56 54  
57 55  
58 56  
59 57  
60 58

## ABSTRACT

**Objectives:** While increasing attention is being paid to the rising prevalence of chronic diseases in Africa, there is little focus on chronic kidney disease (CKD). This systematic review assesses the CKD burden among the general population and high-risk groups on the entire African continent

**Design, setting, and participants:** We searched the MEDLINE and PUBMED databases for articles published between January 1<sup>st</sup>, 1995 and April 7<sup>th</sup>, 2017 by sensitive search strategies focusing on CKD surveys at the community level and high risk groups. In total, 7918 references were evaluated, of which 7766 articles were excluded because they did not meet the inclusion criteria. Thus, 152 studies were included in the final analysis

**Outcome measurement:** The pooled prevalence rate of CKD was expressed as a point estimate and 95% CI. No meta-analysis was done. Data were presented for different population.

**Results:** In the community-level studies, based on available medium and high quality studies, the pooled prevalence of CKD in Africa was 10.1% (95% CI: 9.8%-10.5%). West/Central-West had the highest prevalence (16.5%), followed by Central (16%), Southern (12.2%), Eastern (11.0%), and North (4%) Africa. The prevalence in sub-Saharan Africa was 14.02%. The pooled prevalence of CKD in the high risk groups was 5.6% (95% CI: 5.4-5.8%) in HIV (based on available medium and high quality studies), 24.7% (95% CI: 23.6-25.7%) in diabetes (based on all available studies which are of low quality except four of medium quality) and 34.5% (95 % CI: 34.04%-36%) in hypertensive patients (based on all available studies which are of low quality except two of medium quality)

**Conclusion:** In Africa, CKD is a public health problem, mainly attributed to high risk conditions as hypertension and diabetes. The poor data quality restricts the validity of the findings and draws the attention to the importance of designing future robust studies

### Strengths and limitations of the study

- This systematic review assessed the CKD burden among the general population and high-risk groups on the entire African continent based on studies that covered all Africa from January 1<sup>st</sup>, 1995 till April 7<sup>th</sup>, 2017
- The quality of the included articles was assessed based on standard criteria dealing with clinical trials, diagnostic studies, and observational studies. The articles were assessed based on the population sampling and precision, sampling technique, response rate, and exclusion rate.
- No meta-analysis was conducted in this review due to the huge discrepancy in the definition used to identify CKD, the methods of creatinine measurement, urine protein assessment, and in the quality of the reporting.
- The review findings were limited by the low quality of the majority of studies in Africa
- The prevalence of CKD reported in this review should be interpreted with caution due to the bias introduced from the heterogeneity between studies, analytical and methodological issues, sample size, and study population selection

## 1 INTRODUCTION

2 Chronic kidney disease (CKD) is an emerging global public health problem<sup>1</sup>. The disease is a  
3 component of a new epidemic of chronic conditions that replaced malnutrition and infection as  
4 leading causes of mortality during the twentieth century<sup>2</sup>. Age-standardized death rates due to CKD  
5 have increased during the last 23 years. CKD has shifted from the 36<sup>th</sup> cause of death in 1990 to the  
6 19<sup>th</sup> cause in 2013<sup>3</sup>. The worldwide increase in CKD and kidney failure—necessitating renal  
7 replacement therapy (RRT) —and the high rate of cardiovascular mortality and morbidity  
8 attributable to CKD are poised to reach epidemic proportions over the next decade. CKD  
9 complications represent a considerable burden on global health care resources and only a small  
10 number of countries have sufficiently robust economies to meet the challenge posed by this disease.  
11 Socioeconomic differences in health exist and individuals of lower socioeconomic status (SES)  
12 have a higher risk for mortality and morbidity compared with those of higher SES<sup>4</sup>. A change in the  
13 global approach to CKD from the treatment of ESRD to intensive primary and secondary  
14 prevention is therefore considered an absolute public health priority<sup>5</sup>.

15 Africa is the second largest continent in the world, with a population of over 1 billion; 961.5  
16 million people live in sub-Saharan Africa and 195 million in Northern Africa<sup>6</sup>. Africa now faces the  
17 dual challenge of infectious illnesses and chronic diseases. Africa's chronic disease burden is  
18 secondary to various factors, including increased life expectancy, changing lifestyle practices,  
19 poverty, urbanization and globalization<sup>7</sup>. The World Health Assembly advocated the Global Action  
20 Plan for the Prevention and Control of non-communicable diseases 2013–2020. One of its targets is  
21 to reduce premature mortality from chronic diseases by 25% in 2025. These actions have the  
22 potential to make a significant impact on the burden of CKD<sup>8</sup>. Unfortunately, CKD problem  
23 remains underestimated on the entire continent due to lack of epidemiological information from  
24 different African countries. There exists only a single systematic review conducted in sub-Saharan  
25 Africa which concluded that CKD is a prevalent and potentially escalating disease across Sub-

1 Saharan Africa, with both communicable and non-communicable risk factors<sup>9</sup>. Strategies aimed at  
2 managing CKD epidemics in Africa critically depend on a reliable assessment of the burden of the  
3 problem and the establishment of affordable early detection programs. Previous studies reported the  
4 prevalence of CKD among the general population or the specific prevalence of this condition in  
5 diseases that are recognized as drivers of renal damage (e.g., diabetes mellitus). These estimates  
6 have varied across studies due to differences in the methods of Glomerular Filtration Rate (GFR)  
7 measurement, background risk (general population vs. high risk groups), or demographic  
8 characteristics (e.g., age, gender)<sup>10</sup>.

9 With this background in mind, this review aimed to increase the systematic information on the  
10 burden of CKD in the general population and high risk groups of the entire African continent and  
11 provide an estimate of the prevalence of CKD in different regions of Africa.

## 12 **MATERIALS AND METHODS**

### 13 **Data source and search strategy**

14 We followed the Preferred Reporting Items for Systematic Reviews and Meta-Analyses (PRISMA)  
15 Guidelines<sup>11</sup>. A systematic literature search was performed in the PubMed and OVID-MEDLINE  
16 databases by two authors (DB and SA) to identify articles reporting epidemiology data on CKD in  
17 the adult population in any geographic area of the African continent. This employed focused, highly  
18 sensitive search strategies (S1 Table). The search covered the time frame from January 1<sup>st</sup>, 1995 to  
19 April 7<sup>th</sup>, 2017. Papers without language and study design restrictions were located and screened.  
20 References from relevant studies were screened for supplementary articles.

### 21 **Study selection and data extraction**

22 Titles and abstracts were screened independently by two authors (SA and GD), who discarded  
23 studies that were not relevant to the topic. Case reports, reviews, editorials, letters, and studies  
24 focusing on African-Americans not living on the African continent, conducted entirely among  
25 children, or dealing with acute kidney injury or kidney transplantation were excluded. Two authors  
26

1  
2  
3  
4  
5  
6  
7  
8  
9  
10  
11  
12  
13  
14  
15  
16  
17  
18  
19  
20  
21  
22  
23  
24  
25  
26  
27  
28  
29  
30  
31  
32  
33  
34  
35  
36  
37  
38  
39  
40  
41  
42  
43  
44  
45  
46  
47  
48  
49  
50  
51  
52  
53  
54  
55  
56  
57  
58  
59  
60

(SA, ED) independently assessed the retrieved abstracts and the full texts of these studies to determine eligibility according to the inclusion criteria. Disagreements were resolved through discussion and consensus, or through consultation with a third reviewer (DB), who solved these differences based on study judgments. Furthermore, screening of reference lists of all of the retrieved studies was conducted to check for relevant articles, and a supplementary scan of the reference lists of the systematic reviews was performed to identify any additional studies. Data were extracted from full-text articles and registered using a specifically designed form. These data included study design, geographical area, sample size, the definition of CKD used, prevalence of CKD, age, gender, GFR measurement, type of creatinine assay, proteinuria, the method of outcome assessment and associated comorbidities such as diabetes mellitus and hypertension. Data extraction was performed by one reviewer (SA) and independently verified by another reviewer (DB).

## Data extraction and analysis

Studies were categorized according to the reference population as follows: 1) studies dealing with the general population and 2) studies focusing on particular diseases such as diabetes, hypertension, lupus and HIV or settings, e.g., hospital- based surveys and occupational studies.

Information on the assessment of kidney function was collected, including: the equation adopted for GFR estimation ((Cockcroft-Gault(CG), Modification of Diet in Renal Disease (MDRD), Chronic Kidney Disease-Epidemiology Collaboration (CKD-EPI)), the type of creatinine assay (Jaffe, standardized or unknown), and the type of proteinuria or albuminuria assay used (semi-quantitative assessment by urinary strips or quantitative in urine samples or 24 h collection). When the study included two or three GFR equations, we defined the CKD prevalence based on the CKD-EPI equation whenever this information was provided. Otherwise, we considered the MDRD equation and lastly the CG equation. In the case of ethnicity correction<sup>12-14</sup>, we included the equation which corrected for ethnicity. Information on the definition of CKD used in each study was also included ((either the internationally accepted definition as Kidney Disease Outcome Quality Initiative (KDOQI), or other ways of defining CKD)).

## Quality assessment

Two independent authors (SA and DB) appraised each article independently and assessed its quality based on standard criteria described into details in previous methodology reviews dealing with clinical trials<sup>15</sup>, diagnostic studies<sup>16</sup>, and observational studies<sup>17</sup>. The articles were assessed based on the subject sampling and precision, sampling technique, response rate, method of assessment of kidney function, and exclusion rate

## Statistical analyses

The principal demographic and clinical data for each study were summarized as the mean and standard deviation or as absolute number and percentage, as appropriate. The age range in each study was also recorded. The pooled prevalence rate of CKD was expressed as a point estimate and 95% CI. The prevalence from each study was weighed by the sample size then the pooled prevalence was categorized by the African region. The inter-rater agreement for inclusion and quality assessment was determined using Cohen's kappa ( $\kappa$ ) coefficient<sup>18</sup>. The percentage of the different causes of CKD was weighed by the sample size of each study done among CKD patients. Then we simply summed the number of patients for each etiological factor and divided it by the total sample size from the whole included studies. No meta-analysis was conducted in this study. Data were appropriately presented for different populations (general population and CKD patients). The patients' data were stratified by the type of underlying condition, i.e., hypertension, diabetes mellitus, HIV, or systemic lupus erythematosus. All calculations were conducted using SPSS for Windows, version 21, Chicago, Illinois, USA.

## RESULTS

### Search results

The flow diagram of the selection process is depicted in (Fig. 1). In total, 7897 potentially relevant references were initially retrieved. Twenty-one additional citations were found through a personal

1 search. By screening titles and abstracts, a total 7534 citations were excluded because of search  
2 overlap, dealing with the wrong population (African American, AKI, cancer or post-transplant  
3 patients), or not providing actual data on CKD. Review articles, case reports, editorials, or letters  
4 were also excluded. Amongst the 384 studies selected for full text examination, 232 were excluded  
5 because they dealt with a population different from that specifically targeted in this systematic  
6 review, such as paediatric populations (122 studies), transplant patients (n=44), or others (n=46)  
7 (e.g., Africans living in non-African countries), or because only narrative data were provided  
8 (n=20). A total 152 articles were therefore reviewed in detail and included in the analysis. The main  
9 characteristics of these studies are summarized in Table 1. The inter-rater agreement for inclusion  
10 was  $\kappa=0.90$  and for the quality assessment was  $\kappa=0.85$ .

## 11 Study characteristics

12 Amongst the 152 studies reviewed, 29 were general population studies (Table 2). One-  
13 hundred twenty-three studies focused on selected groups, of which 42 included HIV patients (Table  
14 3), 18 studied diabetic patients (Table 4), nine included hypertensive subjects (Table 5) and twelve  
15 were conducted in other populations (Table 6), including one study in lupus patients<sup>19</sup>, one study in  
16 rheumatoid arthritis patients<sup>20</sup>, one study among sickle cell anemia patients<sup>21</sup>, two in specific  
17 occupational settings (silica exposure<sup>22</sup> and exposure to the nephrotoxic hair-dye,  
18 paraphenylenediamine<sup>23</sup>) and seven studies in family practice<sup>24-26</sup> or hospital-based<sup>27-30</sup> surveys.  
19 Forty-two studies conducted among CKD patients (S2 Table)<sup>31-72</sup>.

20 The studies that were included covered all regions of Africa. The highest number of the studies  
21 came from the Western macro-area (n=54), followed by the Eastern macro-area (n=32), Southern  
22 macro-area (n=25). Twenty studies were retrieved from the Northern Africa, eight studies from  
23 each of the Central macro-area and the Central-Western macro- area. Three studies were conducted  
24 in both the Eastern and Southern regions and two studies in the Sub-Saharan region.

## 1 Assessment of kidney function impairment

2 Urinary markers for kidney disease were assessed in seventy-eight (71%) among one-  
3 hundred ten studies conducted in the general population, high risk groups, occupational or hospital-  
4 based studies. Proteinuria was assessed by a semi-quantitative method (urinary strips) in twenty-  
5 eight studies<sup>21, 24, 26, 29, 73-96</sup>. Twenty studies used dipstick with confirmation by quantitative  
6 methods, nine of which used dipsticks to identify proteinuria/albuminuria with confirmation by 24-  
7 hour proteinuria<sup>25, 97-104</sup> whereas eleven studies used dipstick with confirmation by the protein-to-  
8 creatinine ratio or albumin-to-creatinine ratio<sup>105-115</sup>. Quantitative methods for the assessment of  
9 proteinuria/albuminuria (24-hour proteinuria or albuminuria, PCR, immunoassay, or ACR) were  
10 applied in twenty-nine studies<sup>19, 27, 28, 30, 116-140</sup>. In one study, the method of proteinuria assessment  
11 was not mentioned<sup>141</sup>.

12 Serum creatinine was measured in ninety-five studies (86%). The Jaffe assay was used in  
13 thirty studies<sup>29, 30, 76, 80, 82, 83, 86, 90, 95, 97, 102, 105, 111, 113, 124, 126, 130, 131, 136, 142-152</sup> whereas the IDMS-  
14 calibrated method was used in fifteen studies<sup>12, 14, 21, 26, 115, 117, 132-134, 141, 153-157</sup>. In nine studies, both  
15 the Jaffe assay and the calibrated serum creatinine were used<sup>13, 20, 25, 91, 98, 99, 106, 112, 158</sup>. In the  
16 remaining forty-one studies provided no information on the method of creatinine measurement<sup>19, 24,</sup>  
17 <sup>27, 28, 78, 79, 81, 84, 85, 87-89, 93, 94, 96, 100, 101, 104, 109, 114, 116, 118-122, 125, 127, 135, 137-139, 159-167</sup>. With respect to the  
18 formula used for estimating GFR, the MDRD equation was used in thirty studies<sup>24-26, 28, 29, 94-97, 105,</sup>  
19 <sup>106, 111, 113, 116, 117, 121, 122, 126, 130, 133, 134, 136, 141, 146, 149, 153, 154, 158, 159, 164</sup> and the CG equation was used in  
20 eighteen<sup>19, 76, 81, 86-88, 93, 100, 102, 114, 119, 124, 138, 143, 145, 150, 162, 167</sup>. The other fourteen studies used both  
21 the CG and the MDRD equations<sup>78-80, 83-85, 98, 99, 101, 144, 147, 152, 161, 163</sup>, whereas fifteen studies  
22 estimated GFR by the CG, MDRD, and the CKD-EPI methods<sup>12-14, 20, 82, 90, 91, 109, 112, 115, 139, 142, 155, 156,</sup>  
23 <sup>160</sup>. Six studies used MDRD and CKD-EPI<sup>131, 132, 137, 148, 151, 157</sup> and two studies used CKD-EPI<sup>21</sup>  
24 <sup>166</sup>. In other two studies the formula was not mentioned<sup>30, 135</sup>.



## 1 Definition of CKD

2 Thirty-one studies defined the presence of CKD as an eGFR below 60 ml/min/1.73 m<sup>2</sup> <sup>12,14</sup>  
 3 ,<sup>20,80,93-96,111,117,119,139,146,148-159,161-164,166,167</sup>, with chronicity confirmed by repeated testing in four  
 4 other studies<sup>142-145</sup>. Moreover, twenty-eight studies reported CKD prevalence based on eGFR  
 5 below 60 ml/min/1.73 m<sup>2</sup> and/or the presence of proteinuria or albuminuria<sup>21,24,26,76,78,82-84,86,91,99</sup>  
 6 ,<sup>100,105,106,109,112-114,121,130-137,141</sup>. Proteinuria/albuminuria was used alone to identify CKD in  
 7 fourteen studies<sup>73-75,77,87,92,107,108,110,123,128,129,138,140</sup>. KDOQI staging<sup>168</sup> of CKD was used in  
 8 thirteen studies<sup>13,25,29,79,85,90,97,98,115,116,122,124,126</sup>. The serum creatinine level (either doubling, or  
 9 an increase above a certain threshold) was considered to be a marker of the presence of CKD in four  
 10 studies<sup>89,104,120,165</sup>. In sixteen studies, the definition of CKD was either not mentioned or was  
 11 defined in various ways, including personal history, Creatinine Clearance (CrCl) ≤50 ml/min,  
 12 clinical manifestations, the presence of albuminuria, elevated serum creatinine, and the average of  
 13 two measurements of eGFR < 90 ml/min/1.73 m<sup>2</sup> <sup>2,19,27,28,30,81,88,101-103,118,125,127,147,160,169,170</sup>.

## 14 Paper quality

15 Paper quality was high in sixteen studies <sup>13,25,75,90,91,97,98,105,106,112,116,132-134,148,155</sup>. Thirty-five  
 16 studies were of medium quality <sup>12,14,26,29,73,74,77-79,81,82,96,110,111,115,117,128,130,131,137,141,143-145,150-</sup>  
 17 <sup>152,154,157,159-161,163,166,167</sup>. The rest of the studies were of low quality.

## 18 Prevalence of CKD

19 Based on the prevalence of eGFR <60 ml/min/1.73m<sup>2</sup> and/or the presence  
 20 albuminuria/proteinuria (the current definition of CKD by KDOQI)<sup>168</sup> reported in the 24 medium-  
 21 high quality studies in **Table 2** the pooled prevalence of CKD in the general population in Africa  
 22 was 10.1% (95% CI: 9.8%-10.5%). The highest prevalence was reported in the West/Central-West  
 23 (16.5%), followed by the Central region (16%), Southern (12.2%), Eastern (11.0%), and North (4%)  
 24 Africa (Fig. 2). The pooled prevalence in Sub-Saharan Africa was 14.02% (95% CI: 13.5- 14.5 %).

25 Among HIV patients (**Table 3**), the pooled prevalence of CKD (estimated as above on the

1 basis of the KDOQI definition in the eighteen medium quality studies in the same table) was 5.6%  
2 (95% CI: 5.4-5.8%). Based on the treatment status, the prevalence of renal dysfunction was 9.9%  
3 (95 % CI: 9.4- 10.4%) among HIV patients not receiving treatment while the prevalence was 5.2%  
4 (95 % CI: 5.0-5.4%) among HIV patients on anti-retroviral therapy .The West/ Central-West  
5 recorded the highest prevalence of CKD among HIV patients (11.6%), followed by the East  
6 (11.2%) , and South (3.5%) macro-areas. The prevalence was reported to be 5.7% among the 3  
7 studies done in both the East and South macro- areas and 2.5% from the study done in the sub-  
8 Saharan area

9 Among diabetic patients (**Table 4**, all studies are of low quality except for four with medium  
10 quality), the pooled prevalence of CKD was 24.7% (95%CI: 23.6-25.7%). The highest prevalence  
11 was in the Eastern (46.9%), followed by the Central (40.8%), West/Central-West (27.7%), South  
12 (23.0%), and North (18.9%) Africa. One study was done in sub-Saharan reported that the  
13 prevalence was 13%

14 The pooled prevalence of CKD among hypertensive patients (**TABLE 5**, 9 studies; all of  
15 low quality except for two with medium quality) was 34.5% (95 % CI: 34.04%-36%). The highest  
16 prevalence was reported from one study in the East macro-area (39.5%) followed by the  
17 West/Central-West (37.7%), South (25.4%) Africa. No data were found for other African macro-  
18 areas.

19 Among other patient populations (studies reported in Table 6), almost three quarters of the  
20 lupus patients had CKD (prevalence=72.0%) based on low quality study <sup>19</sup>. Hospital-based surveys  
21 revealed that ( the calculation was based on **the total prevalence** reported from all studies including  
22 three of high-medium quality and 4 of low quality in the same table ) more than one third of  
23 patients attending either primary care centres or tertiary hospitals had CKD (pooled prevalence=  
24 36%, 95% CI: 34.4-37.7%). CKD was prevalent among almost 39% of rheumatoid arthritis <sup>20</sup>or  
25 sickle cell patients <sup>21</sup>. The study (low quality) conducted among hairdressers exposed to  
26 paraphenylenediamine<sup>104</sup> reported that 26.4% of these subjects had renal impairment. Of note,

100% of silica-exposed workers experienced proteinuria ( reported from low quality study)<sup>129</sup>.

The prevalence of CKD was variable based on definition used to diagnose CKD. Based on medium-high quality studies; CKD had a 6.2 % prevalence (95% CI: 6.0- 6.4%) in population studies defining this disease as an eGFR below 60 ml/min/1.73 m<sup>2</sup><sup>12,14,96,111,117,148,150-152,154,155,157,159,163,166,167</sup>. When CKD was diagnosed based on eGFR below 60 ml/min/1.73 m<sup>2</sup> and/or the presence of proteinuria or albuminuria<sup>26,78,82,91,105,106,112,114,130-134,141</sup>; the prevalence was 7.3 % (95 %CI: 6.9-7.7%). The prevalence of CKD was 22.5 % (95% CI: 21.5- 23.5%) in studies where the disease was defined on the basis of proteinuria<sup>73-75,77,110,128</sup>. When KDOQI definition (i.e. by combining the eGFR and proteinuria/albuminuria) was used<sup>13,25,29,79,90,97,98,115,116</sup>, the prevalence of CKD was 19.7% (95% CI: 18.7-20.8%)

## Causes of CKD

Forty-two studies were conducted specifically to clarify the underlying cause of CKD<sup>31-72</sup>. (S2 Table) The diagnosis was biopsy-proven in seventeen studies<sup>33,39,41,43-45,48,54,55,58,60,63,67-70,72</sup>. Vascular/hypertensive sclerosis was the main cause of CKD (16%) followed by diabetic nephropathy (15%), chronic glomerulonephritis (13%), tubulo-interstitial/obstructive (8%), primary glomerular diseases (6%), systemic lupus erythmatosus (3%), and polycystic kidney disease (3%). The causes of CKD were undetermined/miscellaneous causes in one fifth of the patients (20%). (Fig. 3)

## DISCUSSION

This systematic review focuses on the burden of CKD on the entire African continent. We assessed 152 papers published between January 1<sup>st</sup>, 1995 until April 7<sup>th</sup>, 2017, reporting the epidemiology of CKD in the general population and in specific chronic conditions in Africa. The CKD prevalence reported in our review should be interpreted with caution. Our estimates may be affected by the analytical heterogeneity used to measure creatinine and albuminuria. Serum creatinine concentrations are affected by intra-individual variability with over 20% changes within a 2-week

1  
2  
3 1 period<sup>171</sup> and most Jaffe assays overestimate serum creatinine<sup>172</sup>. The resulting bias could vary  
4  
5 2 according to the creatinine concentration, specific assay, manufacturer, and calibration material  
6  
7 3 used. Although the IDMS calibration standardization has reduced the bias and improved the Inter  
8  
9 4 laboratory comparability<sup>173</sup>, the number of studies reported using IDMS was low in Africa.  
10  
11 5 Moreover, CKD prevalence may additionally be influenced by albuminuria assays which are  
12  
13 6 affected by the inter laboratory differences<sup>174</sup>. The different equations used to estimate GFR could  
14  
15 7 be a source of bias. The systematic underestimation of measured GFR at higher estimated GFR by  
16  
17 8 the MDRD equation is well known, and may reflect higher creatinine generation in healthy  
18  
19 9 individuals compared with individuals with CKD in whom the MDRD equation was derived. This  
20  
21 10 bias is reduced substantially, but not completely, by the CKD-EPI equation, which was derived  
22  
23 11 from studies including people without CKD<sup>175</sup>. In addition, differences in sample size,  
24  
25 12 demographics, and clinical characteristics, are all significant limitations in this systematic review  
26  
27 13 for making accurate estimates of the prevalence of CKD in African countries. Furthermore, only  
28  
29 14 five studies<sup>79,142-145</sup> assessed the KDOQI chronicity criterion, which is a fundamental element  
30  
31 15 of the current definition of CKD by this organization. A single elevated serum creatinine, reduced  
32  
33 16 eGFR or an abnormal urinalysis should initially be viewed as a screening test, and a subject with  
34  
35 17 suspected CKD should be considered to have an azotaemia until CKD is determined by the  
36  
37 18 additional workup and clinical judgment<sup>176</sup>. Thus, estimates in this review should be seen as a  
38  
39 19 pragmatic attempt to evaluate the dimension of CKD as a public health issue on the African  
40  
41 20 continent.

42  
43 21 CKD is now considered to be an important component of the epidemic of non-communicable  
44  
45 22 diseases in economically developed and developing countries alike. In a seminal meta-analysis  
46  
47 23 published in 2014 Stanifer et al.,<sup>9</sup> for the first time drew attention to the public health  
48  
49 24 relevance of CKD in the sub-Saharan Africa, a vast area comprising 85% (947.4 million) of  
50  
51 25 the whole African population<sup>9</sup>. In the present systematic review, the lowest prevalence of CKD  
52  
53 26 (4%) was reported in the Northern Africa macro-area; including Egypt, Libya, Tunisia, Algeria,  
54  
55  
56  
57  
58  
59  
60

1  
2  
3 1 Morocco, the Western Sahara, and Mauritania, and the highest (16.5%) was observed in West/  
4  
5 2 Central-West Africa, which includes Benin, Burkina Faso, the island nation of Cape Verde,  
6  
7 3 Gambia, Ghana, Guinea, Guinea-Bissau, Ivory Coast, Liberia, Mali, Mauritania, Niger, Nigeria,  
8  
9 4 Cameroon, the island of Saint Helena, Senegal, Sierra Leone, São Tomé and Príncipe and Togo.  
10  
11 5 The average prevalence in the entire African continent was 10.1%. The global CKD prevalence  
12  
13 6 was reported to be 13.4%<sup>177</sup>. In sub-Saharan Africa in Stanifer's meta-analysis, the prevalence of  
14  
15 7 CKD was 13.2%<sup>9</sup>, which is close to that reported in the same area in our review (14.02%). Among  
16  
17 8 the general population of economically developed countries, CKD has 13.6% prevalence in the  
18  
19 9 USA<sup>178</sup>. In Europe, the reported prevalence is lower and more homogenous, being 8.9% in the  
20  
21 10 Netherlands, 6.8% in Italy, 5.2% in Portugal, 4.7% in Spain, and 3.3% in Norway<sup>179</sup>. CKD  
22  
23 11 prevalence in some Asian countries was higher than the estimates in the USA and in Europe, being  
24  
25 12 17.5% in Thailand<sup>180</sup>, 15% in India<sup>181</sup>, 13% in Japan<sup>182</sup>, 11.9% in Taiwan<sup>183</sup>, and 9.9% in China<sup>184</sup>.  
26  
27 13 Overall, the estimated prevalence of CKD at the general population level in African countries  
28  
29 14 appears to be comparable and possibly even higher than that reported in other continents. This may  
30  
31 15 be at least in part due to the low quality data for the prevalence of CKD in Africa related to poor  
32  
33 16 sampling techniques, unreliable kidney function measurements, and the different definitions used.  
34  
35  
36  
37

38  
39 17 In our review, the prevalence of CKD in surveys based on hospitals or primary care centres  
40  
41 18 (36 %) is close to that in Swiss primary care centres (36%)<sup>185</sup>.  
42

43 19 Poverty-related factors such as infectious diseases secondary to poor sanitation, inadequate  
44  
45 20 supply of safe water, environmental pollutants and high concentrations of disease transmitting  
46  
47 21 vectors continue to play an important role in the development of CKD in low-income countries.  
48  
49 22 Although rates of diabetic nephropathy are rising, chronic glomerulonephritis and interstitial  
50  
51 23 nephritis are among the principal causes of CKD in many countries<sup>186</sup>.  
52  
53

54 24 In Africa, infectious diseases such as HIV, bilharziasis, malaria, hepatitis B and C represent  
55  
56 25 an almost unique cluster of risk factors responsible for CKD<sup>187</sup>. HIV/AIDS is pandemic in Africa,  
57  
58 26 with a prevalence ranging from 0.5% in Senegal<sup>188</sup> to 27.4% in Swaziland<sup>189</sup>. The global success in  
59  
60

1 bringing effective antiretroviral treatment (HAART) to HIV-infected patients in Africa has  
2 determined the emergence of chronic medical illnesses such as HIV-related CKD<sup>190</sup>. Up to 50% of  
3 kidney diseases in HIV-infected persons result from a wide array of non-HIV-associated  
4 nephropathy (HIVAN) pathologies, ranging from glomerulonephritis to diabetic nephropathy<sup>191</sup>.  
5 We found that 5.6% of HIV patients complained of renal dysfunction. This figure is lower than that  
6 reported in economically developed countries such as France, USA, China, Spain, and Brazil<sup>192-196</sup>.  
7 CKD was higher among HIV patients not receiving HAART compared to those on HAART.  
8 Variation in the proportion of HIV patients affected by CKD depends on the heterogeneity in the  
9 definition used to determine renal dysfunction, the proportion of the study population on HAART,  
10 diverse ethnicities, the associated comorbidities, and the nutritional status of the study population.  
11 HIV patients are more prone to nutritional deficiencies due to mal-absorption, impaired oral intake,  
12 and the wasting syndrome. Increased availability of HAART has led to some improvement of the  
13 nutritional status of patients. However, for certain individuals, undernutrition and weight loss  
14 persist despite therapy. Malnutrition exacerbates side effects, alters drug pharmacokinetics, and  
15 impinges on adherence thereby limiting the beneficial effects of the therapy<sup>197</sup>. Furthermore,  
16 differences in HIV clades or strains in African patients<sup>198</sup> and genetic factor<sup>199</sup> may influence the  
17 replication capacities within the isolated renal reservoir and thus lead to a diversity in clinical  
18 presentations<sup>80</sup>.

19       Regarding systemic autoimmune diseases such as lupus, a study conducted among lupus  
20 patients from Senegal showed that almost three quarters (71.0%) the patients with this disease had  
21 evidence of renal involvement<sup>19</sup>. This isolated figure is higher than that reported in other  
22 countries<sup>200-202</sup>. More than one third (39%) patients with rheumatoid arthritis had CKD<sup>20</sup> which is  
23 higher than that reported from Taiwan<sup>203</sup>.

24       Even though there are no sufficient data to precisely reconstruct historical trends, the profile  
25 of CKD causes has changed during the last decades. Interstitial nephritis and glomerulonephritis  
26 were the main causes of CKD in North Africa<sup>204</sup> and CKD was principally caused by chronic

1  
2  
3  
4  
5  
6  
7  
8  
9  
10  
11  
12  
13  
14  
15  
16  
17  
18  
19  
20  
21  
22  
23  
24  
25  
26  
27  
28  
29  
30  
31  
32  
33  
34  
35  
36  
37  
38  
39  
40  
41  
42  
43  
44  
45  
46  
47  
48  
49  
50  
51  
52  
53  
54  
55  
56  
57  
58  
59  
60

glomerulonephritis and hypertension in East and Tropical Africa<sup>205,206</sup>. Today, the spectrum of causes of CKD in Africa is dominated by diabetes mellitus and hypertension<sup>207</sup>. We found that the prevalence of vascular/hypertensive and diabetic nephropathies as a cause of CKD (16% and 15%, respectively) exceeded that caused by chronic glomerulonephritis (13%).

Our review has both strengths and limitations. The major strengths include a thorough systematic search of electronic databases and the inclusion of all comprehensive studies with a transparent assessment of CKD prevalence by two independent reviewers. The fact that our literature search was limited to PubMed and Medline OVID but did not include the African Index Medicus, like it was done by Stanifer in the meta-analysis of CKD in sub-Saharan Africa [8], is a limitation of our study. Because there was a huge discrepancy in the definitions used to identify CKD, the methods of creatinine measurement, urine protein assessment, and in the quality of the reporting, we decided to adopt an inclusive strategy. Our primary interest was to identify all studies conducted among different population groups in Africa providing information on CKD and to reconstruct a tentative scenario of the epidemiological dimension concerning disease in the entire African continent. Methodological limitations notwithstanding this review compiled estimates suggesting that the CKD burden in Africa is at least as concerning as that in economically-developed countries. The lack of a consistent definition of CKD makes it difficult to compare the burden of CKD across studies in various countries. Moreover, the failure to demonstrate chronicity when defining CKD is a common limitation of studies investigating CKD prevalence in Africa. It was reported that a single test in time has an extremely poor positive predictive value for confirmation of CKD compared to repeated testing 3 months later. Failure to repeat testing may lead to a significant overestimation of CKD prevalence and underestimation of the burden of CVD in CKD<sup>208</sup>. In addition, Observational studies are subject to bias and residual confounding which are difficult to account for and there are limitations due to the heterogeneity that arises from differences in age and sex distributions. These poor data quality reported in different studies is considered as a cumbersome problem limiting the accuracy in assessing the burden of CKD in Africa

1  
2  
3 1 In conclusion, CKD in Africa appears to be at least as common as in other continents and as  
4  
5 2 such, it constitutes a true public health priority with major cost burden to healthcare systems  
6  
7 3 worldwide. Targeted screening of high-risk groups (including those with hypertension, diabetes  
8  
9 4 mellitus, HIV patients and persons with occupational exposures) should likely be instituted as the  
10  
11 5 first step in kidney disease prevention whenever and wherever affordable and feasible. Education to  
12  
13 6 increase awareness of CKD among healthcare workers and patients, and the promotion of healthy  
14  
15 7 life styles, should be engrained in preventive programs. The treatment of hypertension and diabetes  
16  
17 8 mellitus are of obvious relevance. Nurses and other health workers should be trained to manage  
18  
19 9 these conditions at the local level if we are to curb the incidence of CKD and to avert the added  
20  
21 10 burden of CKD complications to diabetes, hypertension, and infectious diseases, the deadly trio of  
22  
23 11 risk factors underlying the CKD epidemic in Africa.  
24  
25  
26  
27  
28  
29  
30  
31  
32  
33  
34  
35  
36  
37  
38  
39  
40  
41  
42  
43  
44  
45  
46  
47  
48  
49  
50  
51  
52  
53  
54  
55  
56  
57  
58  
59  
60



1  
2  
3  
4  
5  
6  
7  
8  
9  
10  
11  
12  
13  
14  
15  
16  
17  
18  
19  
20  
21  
22  
23  
24  
25  
26  
27  
28  
29  
30  
31  
32  
33  
34  
35  
36  
37  
38  
39  
40  
41  
42  
43  
44  
45  
46  
47  
48  
49  
50  
51  
52  
53  
54  
55  
56  
57  
58  
59  
60

### 1 FUNDING STATEMENT:

2 Samar Abd ElHafeez was granted an European Renal Association-European Dialysis and  
3 Transplantation Association (ERA-EDTA) fellowship at CNR-IFC/IBIM, Clinical Epidemiology  
4 and Physiopathology of Renal Disease and Hypertension of Reggio Calabria, Italy, and this work  
5 was completed during her training.

6 This article was written by in the framework of the Advisory Program of the ERA-EDTA YNP  
7 (Young Nephrologists' Platform) which is an official body of the ERA-EDTA (European Renal  
8 Association - European Dialysis and Transplant Association).

9 Dr. Samar Abd ElHafeez was an advisee of ERA-EDTA YNP Adviser-Advisee Program (Adviser  
10 Dr. Davide Bolignano)."

11  
12 **COMPETING OF INTERESTS:** Not declared.

### 14 AUTHORS' CONTRIBUTIONS:

15 SA, DB, and CZ: conceptualized and designed the study.

16 SA, GD, and ED: participated in revising the articles included in the review and retrieved the  
17 necessary information.

18 DB and GT: supervised the data capture and analysis.

19 SA, DB, and GT: analysed and interpreted the data.

20 SA, DB, and CZ: drafted and critically revised the manuscript.

21 All of the authors read and approved the final manuscript.

22  
23 **DATA SHARING STATEMENT:** No additional data are available.

### 25 ACKNOWLEDGEMENTS

26 We would like to thank the following professors and physicians for their help in providing the  
27 articles we evaluated in our review:

28 Prof. Olutayo Alebiosu, Prof.Ahmed Donia, Prof. Rashad Barsoum, Prof. Carel IJsselmuiden,  
29 Prof. Laurent Forcard, Prof. Anatole Laleye, Prof. Nestor Pakasa, Prof. Imaobong Etuk, Prof.  
30 Ifeoma Ulasi, Prof. Abubakr Abefe Sanusi, Prof. Gbenga Ayodele, Prof. Raida S. Yahya, Prof.  
31 Mohammed Benganem Gharbi, Prof. Fatma Ben Moussa, Dr.Ikechi Okpechi, Dr. Alaya Akram,  
32 Dr.Adebowale Ademola,Dr. Oluyombo Rotimi,, Dr.K S Nayak, Dr. Guy Neild, Dr.Rasheed  
33 Gbadegesin, Dr.Sidy Mohamed Seck, Dr. Amr El-Husseini Mohamed, Dr.Fasika M. Tedla, Prof.  
34 Adewale Akinsola, Prof. Olanrewaju Adedoyin, Dr.Halle Marie Patrice, Dr. Emmanuel Agaba,  
35 Prof. Miriam Adhikari, Dr. B.T Bello, Dr.Zidane Djelloul

**Table 1: Characteristics of the study population included in the analysis**

| Study population         | Number of the studies | Study characteristics                                                                                             |
|--------------------------|-----------------------|-------------------------------------------------------------------------------------------------------------------|
| General population       | 29                    | N=30169, age ranging from 12 to 95 years; 48% males                                                               |
| Diabetic patients        | 18                    | N=9082, age ranging from 14 to 90 years; 43% males                                                                |
| Hypertensive patients    | 9                     | N=4123, age ranging from 19 to 90 years; 43% males                                                                |
| HIV patients             | 42                    | N= 67432, age ranging from 13 to 74 years; 36% males                                                              |
| Occupational group       | 2                     | N= 153, age ranging from 22 to 59 years; one study only enrolled females and the other principally enrolled males |
| Family practice patients | 7                     | N= 3250, age ranging from 20-74 years, 44% males                                                                  |
| Lupus patients           | 1                     | N= 43, age ranging from 16 to 55 years, 7% males                                                                  |
| Rheumatoid arthritis     | 1                     | N=233, age ranging from 40-70 years, 17.2% males                                                                  |
| Sickle cell anemia       | 1                     | N=194, age ranging from 12-40 years, 43.3% males                                                                  |
| CKD patients             | 42                    | N= 34236, age ranging from 12 to 90 years, 58% males                                                              |

**Table 2: Studies on CKD among the general population**

| Study ID                    | Year, Country, Region   | Location                                                                 | N    | Population Characteristic                                                                                                                                                                                        | Definition of CKD                | Method of outcome assessment                                                                            | Type of creatinine assay      | Proteinuria                                   | CKD prevalence                                                                     | Quality assessment |
|-----------------------------|-------------------------|--------------------------------------------------------------------------|------|------------------------------------------------------------------------------------------------------------------------------------------------------------------------------------------------------------------|----------------------------------|---------------------------------------------------------------------------------------------------------|-------------------------------|-----------------------------------------------|------------------------------------------------------------------------------------|--------------------|
| Abdelsatir S <sup>169</sup> | 2013 Sudan North-east   | All village inhabitants                                                  | 389  | Age (years): 41 ± 15<br>Male gender: 16.2%<br>Hypertension:39.6%,<br>DM: 17%<br>BMI category: ( kg/m <sup>2</sup> )<br><18: 6.2%,<br>18-24.9: 65.8%,<br>25-29.9: 20.2 %,<br>≥30: 7.8%                            | Not identified, personal history | Personal history                                                                                        | Not mentioned                 | Not measured                                  | <b>Total prevalence (as reported): 6.40%</b>                                       | Low                |
| Fatiu A <sup>73</sup>       | 2011 Nigeria West       | Market population                                                        | 286  | Age (years): 49.5 ± 5.7<br>Male gender: 9.8%<br>Hypertension: 37.7%<br>BMI (kg/m <sup>2</sup> ): 26.76 ± 5.28<br><20 kg/m <sup>2</sup> : 7.4%<br>20-25 kg/m <sup>2</sup> : 33.4%<br>> 25 kg/m <sup>2</sup> : 59% | Proteinuria ≥ +1                 | Midstream urine sample was tested by urinary strip                                                      | Not measured                  | <b>29.70%</b>                                 | <b>Total prevalence ( based on proteinuria prevalence): 29.7%</b>                  | Medium             |
| Traore M <sup>74</sup>      | 1998 Mali West          | All Household population of the villages                                 | 1098 | Age (years): 30±12<br>Male gender: 52%                                                                                                                                                                           | Proteinuria ≥ +1                 | Microhaematuria and proteinuria by urinary strip                                                        | Not measured                  | 40.80%                                        | <b>Total prevalence ( based on proteinuria prevalence): 40.80%</b>                 | Medium             |
| Matsha T <sup>12</sup>      | 2013 South Africa South | Bellville town inhabitants                                               | 1202 | Age (years): 52.9 ±14.8<br>Male gender: 24.7%<br>SBP: 125±20<br>DBP: 76 ±13<br>DM: 26.4%<br>BMI: 29.9 ±7.2                                                                                                       | eGFR<60 ml/min                   | 4 variables: MDRD, CG, CKD-EPI                                                                          | Standardized creatinine assay | Not measured                                  | <b>Prevalence of stages 3-5: 7.4% (based on CKD-EPI with ethnicity correction)</b> | Medium             |
| Seck SM <sup>97</sup>       | 2014 Senegal West       | Two stage cluster sampling of Urban and rural inhabitants of Saint-Louis | 1037 | Age (years): 48.0 ± 16.9<br>Male gender: 40%<br>Hypertension: 39.1%<br>DM: 12.7%<br>BMI: 26.3 ± 6.8 kg/m <sup>2</sup>                                                                                            | KDOQI                            | Albuminuria by urinary strips. Positive samples were confirmed by 24-hour albuminuria, eGFR by 186 MDRD | Kinetic Jaffe                 | 5.3% albuminuria >1 g/l                       | <b>Total prevalence: 6.1%</b>                                                      | High               |
| Pruijm M <sup>116</sup>     | 2008 Seychelles, East   | a random sex-stratified and age-stratified sample inhabitants            | 1255 | Age (years): range, 25-64<br>Male gender: 46%                                                                                                                                                                    | KDOQI                            | Quantitative microalbuminuria by ACR, eGFR using MDRD                                                   | Not mentioned                 | 11.4% microalbuminuria, 0.7% macroalbuminuria | <b>Total prevalence : 15.3%</b><br>Prevalence of stages 3–4 CKD 3.2%.              | High               |

|                           |                         |                                              |      |                                                                                                                                                                                                                                                                  |                                                                                               |                                                                                                            |  |                                                 |                                                                                                                                                                                                                                  |        |
|---------------------------|-------------------------|----------------------------------------------|------|------------------------------------------------------------------------------------------------------------------------------------------------------------------------------------------------------------------------------------------------------------------|-----------------------------------------------------------------------------------------------|------------------------------------------------------------------------------------------------------------|--|-------------------------------------------------|----------------------------------------------------------------------------------------------------------------------------------------------------------------------------------------------------------------------------------|--------|
|                           |                         | of Seychelle                                 |      |                                                                                                                                                                                                                                                                  |                                                                                               |                                                                                                            |  |                                                 |                                                                                                                                                                                                                                  |        |
| Sumaili EK <sup>98</sup>  | 2009 Congo Central      | Multistage sampling of residents of Kinshasa | 500  | Age (years): 38.6 ± 14.4<br>Male gender: 41%<br>Hypertension: 27.6%<br>DM: 11.7%<br>BMI category:<br>25–29.9 kg/m <sup>2</sup> : 20.3%<br>≥30 kg/m <sup>2</sup> : 14.9%                                                                                          | KDOQI                                                                                         | Proteinuria by urinary strip and 24-hour proteinuria, eGFR by CG and 175MDRD                               |  | 18% proteinuria by dipstick<br>5% (≥300 mg/day) | <b>Total prevalence:</b><br>MDRD 12.4%<br>CG 19%<br><br><b>Prevalence by stage (MDRD)</b><br>Stage 1: 2%<br>Stage 2: 2.4%<br>Stage 3: 7.8%<br>Stage 4: 0.2%                                                                      | High   |
| Matsha T <sup>159</sup>   | 2014 South Africa South | All residents of Cape-Town                   | 320  | Age (years): mean, 56.4 (55.1–57.6, 95% CI)<br>Male gender: 22%<br>SBP: 124.7 (122.8–126.7, 95% CI) mmHg<br>DBP: 75.5 (74.2–76.7, 95% CI) mmHg<br>BMI: 31.9 (31.2–32.7, 95% CI) kg/m <sup>2</sup><br>Mean eGFR at baseline: 68.6±16.7 ml/min/1.73 m <sup>2</sup> | eGFR < 60 ml/min/1.73 m <sup>2</sup>                                                          | eGFR- 186MDRD (4 variables)                                                                                |  | Not measured                                    | <b>Total Prevalence 28.9% by categories</b><br>eGFR>90 ml/min/1.73m <sup>2</sup> :9.4%<br>eGFR60-90 ml/min/1.73m <sup>2</sup> : 58.7%<br>eGFR30-60 ml/min/1.73m <sup>2</sup> : 28.1%<br>eGFR<30 ml/min/1.73m <sup>2</sup> : 0.9% | Medium |
| Sumaili EK <sup>75</sup>  | 2008 Congo Central      | All Residents of Kinshasa                    | 3018 | Age (years): 44.3 ±15.3<br>Male gender: 59%<br>Hypertension: 18%<br>DM: 4%                                                                                                                                                                                       | Proteinuria ≥ +1                                                                              | Proteinuria by urinary strip                                                                               |  | 17.1%                                           | <b>Total prevalence ( based on proteinuria prevalence): 17.1%</b>                                                                                                                                                                | High   |
| Egbi OG <sup>76</sup>     | 2014 Nigeria West       | All Civil servants in Bayelsa                | 179  | Age (years): 45.2 ± 10.3<br>Male gender: 53.1%<br>SBP:128.5± 17.5 mmHg<br>DBP: 81.8 ±13.2 mmHg                                                                                                                                                                   | eGFR <60 ml/min/1.73 m <sup>2</sup> and/or presence of proteinuria of at least +1 on dipstick | Proteinuria by urinary strip, eGFR by CG equation standardized for body surface area (BSA)                 |  | 5.6%                                            | <b>Total prevalence: 7.8%</b><br><br><b>Prevalence by stage</b><br>Stage 1:3.4%<br>Stage 2: 2.2%<br>Stage 3: 2.2%<br>None in stage 4 or 5                                                                                        | Low    |
| Oluyombo R <sup>105</sup> | 2013 Nigeria West       | Multistage sampling of Households of Ilie    | 454  | Age (years): 45.8 ± 19.0<br>Male gender: 43%<br>Hypertension: 20.4%<br>DM: 0.6%                                                                                                                                                                                  | eGFR <60 ml/min and/or macroalbuminuria (ACR>300 mg/g or dipstick proteinuria)                | Proteinuria by urinary strip, negative cases were estimated for albumin creatinine ratio, eGFR by 186 MDRD |  | Macroalbuminuria in 8.9%                        | <b>Total prevalence: 18.8%</b><br><br><b>Prevalence by stage</b><br>Stage 1: 2.4%<br>Stage 2: 4.1%<br>Stage 3: 11.8%<br>Stage 4: 0.5%                                                                                            | High   |
| Eastwood J <sup>13</sup>  | 2010 Ghana, West        | Inhabitants of 12 villages                   | 944  | Age (years): 54.7±11.2<br>Male gender: 38%<br>SBP:125.5±26.0 mmHg                                                                                                                                                                                                | KDOQI                                                                                         | 175MDRD, CG, CKD-EPI                                                                                       |  | Kinetic Jaffe and calibrated IDMS               | <b>Total Prevalence ( based on CKD-EPI and ethnicity correction) :</b>                                                                                                                                                           | High   |

|                              |                          |                                                                                                                               |       |                                                                                                                                 |                                                                                                                                                                                                        |                                                                        |                           |                                             |                                                                                                                                                               |        |
|------------------------------|--------------------------|-------------------------------------------------------------------------------------------------------------------------------|-------|---------------------------------------------------------------------------------------------------------------------------------|--------------------------------------------------------------------------------------------------------------------------------------------------------------------------------------------------------|------------------------------------------------------------------------|---------------------------|---------------------------------------------|---------------------------------------------------------------------------------------------------------------------------------------------------------------|--------|
|                              |                          |                                                                                                                               |       | DBP: 74.4 ± 13.6 mmHg<br>DM: 4%<br>BMI: 21.1 ± 4.2 kg/m <sup>2</sup>                                                            |                                                                                                                                                                                                        |                                                                        |                           |                                             | 1.7%<br>MDRD: 1.6% (7.2 %<br>without ethnicity<br>correction;<br>CKD-EPI 1.7% (4.7%<br>without ethnicity<br>correction),<br>CG 21.0%.                         |        |
| Gouda Z <sup>117</sup>       | 2011<br>Egypt<br>North   | Community<br>based in<br>Al-<br>Buhayrah<br>governorate                                                                       | 417   | Age (years): 39.12 ±<br>14.29<br>Male gender: 43.2%<br>Hypertension: 25.20%<br>DM: 10.6%<br>BMI: 29.96 ± 6.18 kg/m <sup>2</sup> | eGFR <60 ml/min/1.73 m <sup>2</sup>                                                                                                                                                                    | Quantitative assessment of urinary<br>ACR, eGFR by 175 MDRD            | IDMS-calibrated           | 10.6%<br>microalbuminuria                   | <b>Total prevalence 18%</b>                                                                                                                                   | Medium |
| Ayodele<br>OE <sup>77</sup>  | 2011<br>Nigeria<br>West  | People at a<br>major trade<br>center, the<br>public<br>servant<br>secretariat<br>and the<br>state<br>broadcastin<br>g station | 586   | Age (years): 42.4±11.2<br>Male gender: 61.4 %<br>Hypertension: 16.4%<br>DM: 3.8%<br>BMI: 25.9±5.4 kg/m <sup>2</sup>             | proteinuria ≥+1                                                                                                                                                                                        | Proteinuria by urinary strip                                           | Not assessed              | 2.50%                                       | <b>Total prevalence ( based<br/>on proteinuria ): 2.50%</b>                                                                                                   | Medium |
| Abu-Aisha<br>H <sup>78</sup> | 2009<br>Sudan<br>East    | Pilot survey<br>of police<br>housing<br>complex                                                                               | 273   | Age (years): 34.3±12<br>Male gender: 49.1%<br>Hypertension: 27%<br>DM: 5.1%                                                     | eGFR <60 ml/min/1.73 m <sup>2</sup><br>and or proteinuria                                                                                                                                              | Proteinuria by urinary strip,<br>175MDRD, CG                           | Not mentioned             | 5.30%                                       | <b>Total prevalence<br/>(MDRD) 7.7%<br/>[11% by CG]</b><br><br><b>Prevalence by stage</b><br>Stage 1 or 2: 4.7%<br>Stage 3: 2.6%<br>Stage 4: 0<br>Stage: 0.4% | Medium |
| Gharbi<br>M <sup>106</sup>   | 2012<br>Morocco<br>North | Stratified<br>random<br>sampling of<br>population<br>in two<br>towns                                                          | 10524 | Age (years): range, 25-<br>70<br>Male gender: (50%),<br>Hypertension : 16.7%                                                    | eGFR < 60 ml/ min/1.73<br>m <sup>2</sup> or macroalbuminuria or<br>dipstick abnormalities<br>(proteinuria<br>≥ ++ 1 or haematuria: ≥<br>++1) or diabetes type 1<br>associated with<br>microalbuminuria | 175 MDRD, microalbuminuria and<br>proteinuria by urinary strip and ACR | Kinetic Jaffe and<br>IDMS | microalbuminuria<br>(30-299 mg/l):<br>5.26% | <b>Total prevalence 2.90%</b>                                                                                                                                 | High   |
| CU O <sup>153</sup>          | 2014<br>Nigeria<br>West  | All<br>attendees to<br>lectures of<br>the<br>Ebreime<br>Foundation<br>for the<br>elderly,                                     | 170   | Age (years): 68.1±7.7<br>Male gender: 67.1%                                                                                     | eGFR<60ml/min/1.73 m <sup>2</sup>                                                                                                                                                                      | 175 MDRD                                                               | IDMS calibrated           |                                             | <b>Total prevalence:<br/>43.50%,<br/>(all cases were at stage<br/>3)</b>                                                                                      | Low    |

|                             |                            |                                                                                      |      |                                                                                                                                                                                     |                                                                                              |                                                               |                        |                       |                                                                                                                                               |        |
|-----------------------------|----------------------------|--------------------------------------------------------------------------------------|------|-------------------------------------------------------------------------------------------------------------------------------------------------------------------------------------|----------------------------------------------------------------------------------------------|---------------------------------------------------------------|------------------------|-----------------------|-----------------------------------------------------------------------------------------------------------------------------------------------|--------|
| Booyesen H <sup>155</sup>   | 2016 South Africa South    | participants from families of black African descent                                  | 1221 | Age (years):44.1±18.4<br>Male gender:34.9%<br>BMI (kg/m <sup>2</sup> ):29.5±8.0<br>Hypertension: 45%<br>Diabetes mellitus:25.2%                                                     | eGFR<60ml/min/1.73 m <sup>2</sup>                                                            | eGFR by CG, 4 variables MDRD, CKD-EPI                         | IDMS calibrated        | Not measured          | <b>Total prevalence:6.3%</b>                                                                                                                  | High   |
| Kalyesubula R <sup>90</sup> | 2017 Uganda East           | Community based survey among all households of Wakiso district                       | 955  | Age (years):31 (IQR: 24–42)<br>Male gender: 33%<br>BMI(kg/m <sup>2</sup> ) categories:<br>Underweight:5.5%<br>Normal: 56.9%<br>Overweight:24.2%<br>obese : 13.4%<br>Diabetics: 5.9% | KDOQI                                                                                        | Proteinuria by dipstick and eGFR by CG, MDRD, and CKD-EPI     | Kinetic Jaffe          | 0.3%                  | <b>Total prevalence: 15.2%</b><br><b>Prevalence by stage:</b><br>Stage 1: 6.2%<br>Stage 2:12.7%<br>Stage 3:2.4%<br>Stage 4:0<br>Stage 5: 0.1% | High   |
| Kaze F <sup>91</sup>        | 2015 Cameroon Central-West | Population of the Littoral region                                                    | 500  | Age (years): 45.3 ± 13.2<br>Male gender: 53.4%<br>BMI (kg/m <sup>2</sup> ): 27.1 ±5.3<br>Diabetes mellitus: 2.8%<br>Hypertension: 12.2%                                             | any albuminuria and/or eGFR <60 ml/min/1.73m <sup>2</sup>                                    | Albuminuria by dipstick and eGFR by CG, MDRD, CKD-EPI         | Kinetic Jaffe and IDMS | 7.2%                  | <b>Total prevalence (CKD-EPI): 10%</b><br>[14.2% by CG, 11%MDRD]                                                                              | High   |
| Kaze F <sup>112</sup>       | 2015 Cameroon Central-West | Population of the Western Region                                                     | 439  | Age (years):47 ± 16.1<br>Male gender: 42.1%<br>Hypertension: 10.7%<br>Diabetes mellitus: 5.9%                                                                                       | Albuminuria and/or eGFR <60 ml/min confirmed 3 months later                                  | Albuminuria by dipstick and ACR and eGFR by CG, MDRD, CKD-EPI | Kinetic Jaffe and IDMS | 12.1% had albuminuria | <b>Total prevalence (CKD-EPI): 27.6%</b><br>[38.5% by CG, 27.3%MDRD]                                                                          | High   |
| Laurence E <sup>130</sup>   | 2016 South Africa South    | Teachers from public schools in the urban area of the Metro South Education District | 489  | Age (years): 46.3 ± 8.5<br>Male gender: 30%<br>BMI(kg/m <sup>2</sup> ):males: 29.1 ±4.8, females: 32.4.1 ±7.<br>Hypertension: 48.5%<br>Diabetes mellitus: 10.1%                     | Proteinuria ≥0.30 mg/mg or eGFR <60 ml/min/1.73 m <sup>2</sup>                               | Proteinuria by PCR and eGFR using MDRD                        | Kinetic Jaffe          | Not mentioned         | <b>Total prevalence: 10.4%</b>                                                                                                                | Medium |
| Lunyera J <sup>92</sup>     | 2016 Uganda East           | Urban residents of Kampala                                                           | 141  | Age (years): 64% in age group of 18-39<br>Male gender: 43%<br>BMI( kg/m <sup>2</sup> ): 25.9 (IQR 22.7–30.7)<br>Hypertension: 38%<br>Impaired fasting blood glucose: 13%            | Proteinuria as urine protein of ≥1+ on dipstick in the absence of hematuria and leukocyturia | Proteinuria by dipstick                                       | Not measured           | 13%                   | <b>Total prevalence(based on proteinuria): 13%</b>                                                                                            | Low    |
| Mogueo A <sup>131</sup>     | 2015 South Africa South    | Household residents of Bellville                                                     | 902  | Age (years): 55±15<br>Male gender: 23%<br>BMI( kg/m <sup>2</sup> ): 29.9 ±7.2<br>Hypertension: 49.8%<br>Diabetes mellitus: 27.9%                                                    | eGFR <60 ml/min/1.73 m <sup>2</sup> , or any nephropathy                                     | Albuminuria by ACR and eGFR by MDRD and CKD-EPI               | Kinetic Jaffe          | 2.3%                  | <b>Total prevalence( CKD-EPI): 21.7%</b><br>[ prevalence by MDRD: 29.7%]                                                                      | Medium |
| Peck R <sup>148</sup>       | 2016, Tanzania             | Stratified multistage                                                                | 1043 | Age (years):35.5 ± 15.3<br>Male gender: 45.7%                                                                                                                                       | eGFR<60 ml/min/1.73 m <sup>2</sup>                                                           | eGFR by MDRD and CKD-EPI                                      | Kinetic Jaffe          | Not measured          | <b>Total prevalence )CKD-EPI): 7%</b>                                                                                                         | High   |

1  
2  
3  
4  
5  
6  
7  
8  
9  
10  
11  
12  
13  
14  
15  
16  
17  
18  
19  
20  
21  
22  
23  
24  
25  
26  
27  
28  
29  
30  
31  
32  
33  
34  
35  
36  
37  
38  
39  
40  
41  
42  
43  
44  
45  
46  
47  
48  
49

|                           |                      |                                                               |     |                                                                                                                                                                 |                                                                                                                                 |                                                                     |               |               |                                 |      |
|---------------------------|----------------------|---------------------------------------------------------------|-----|-----------------------------------------------------------------------------------------------------------------------------------------------------------------|---------------------------------------------------------------------------------------------------------------------------------|---------------------------------------------------------------------|---------------|---------------|---------------------------------|------|
|                           | , East               | sampling of adult population in Mwanza city, Geita and Kahama |     | BMI( kg/m <sup>2</sup> ) categories:<br>Underweight: 10.5%<br>Normal: 71%<br>Overweight: 11.8%<br>Obese :6.6%<br>Diabetes mellitus: 0.9%<br>Hypertension: 17.3% |                                                                                                                                 |                                                                     |               |               |                                 |      |
| Stanifer J <sup>132</sup> | 2016, Tanzania, East | stratified, cluster-designed cross-sectional household        | 481 | Age (years): 46.9 ± 15.1<br>Male gender: 74.4%<br>Diabetes mellitus: 9.4%<br>Hypertension: 31%                                                                  | presence of albuminuria (≥30 mg/dl; confirmed by repeat assessment) and/or a reduction in eGFR ≤60 ml/min/1.73 m <sup>2</sup>   | Quantitative assessment of albuminuria and eGFR by MDRD and CKD-EPI | IDMS          | 6.8%          | <b>Total prevalence : 11.9%</b> | High |
| Stanifer J <sup>133</sup> | 2015, Tanzania, East | Randomly selected adults                                      | 481 | Age (years): 45 (IQR 35–59)<br>Male gender: 25.6%<br>Diabetes mellitus: 12.7%<br>Hypertension: 28%                                                              | eGFR<60 ml/min/1.73m <sup>2</sup> and/or persistent albuminuria                                                                 | Quantitative assessment of albuminuria and eGFR by MDRD             | IDMS          | Not mentioned | <b>Total prevalence: 7%</b>     | High |
| Stanfier J <sup>134</sup> | 2016, Tanzania, East | stratified, cluster-designed cross-sectional survey           | 606 | Age (years): 45.5 ±15.5<br>Male gender: 24.6%<br>Diabetes mellitus: 10.1%<br>Hypertension: 23.7%                                                                | the presence of albuminuria (≥30mg/dl confirmed by repeat assessment) and/or a once-measured eGFR ≤60 ml/min/1.73m <sup>2</sup> | Quantitative assessment of albuminuria and eGFR by MDRD             | IDMS          | Not mentioned | <b>Total prevalence: 8%</b>     | High |
| Wachukwu C <sup>93</sup>  | 2015, Nigeria, West  | Adult volunteers in a university                              | 259 | Age (years):28.3±9.7<br>Male gender: 52.1%<br>SBP(mmHg):117.3±15.5<br>DBP(mmHg): 75.7±11.7                                                                      | eGFR<60 ml/min/1.73m <sup>2</sup>                                                                                               | Proteinuria by dipstick and eGFR by CG                              | Not mentioned | 12.4%         | <b>Total prevalence: 1.9%</b>   | Low  |

DM: diabetes mellitus, BMI: body mass index, SBP: systolic blood pressure, DBP: diastolic blood pressure, IDMS: Isotope dilution mass spectrometry, MDRD: Modification of Diet in Renal Disease, CG: Cockcroft Gault, CKD-EPI: Chronic Kidney Disease Epidemiology Collaboration, IQR: inter-quartile range, KDOQI: Kidney Disease Outcome Quality Initiative

Table 3: Studies on CKD among HIV patients

1  
2  
3  
4  
5  
6  
7  
8  
9  
10  
11  
12  
13  
14  
15  
16  
17  
18  
19  
20  
21  
22  
23  
24  
25  
26  
27  
28  
29  
30  
31  
32  
33  
34  
35  
36  
37  
38  
39  
40  
41  
42  
43  
44  
45  
46  
47  
48  
49

| Author                 | Year, Country, Region                  | Location                             | N    | Study group                                 | Population characteristics                                                                                                                                      | Definition of CKD                                                                                                                                       | Method of outcome assessment | Creatinine assay | Proteinuria  | CKD prevalence                                                                                                                | Quality assessment |
|------------------------|----------------------------------------|--------------------------------------|------|---------------------------------------------|-----------------------------------------------------------------------------------------------------------------------------------------------------------------|---------------------------------------------------------------------------------------------------------------------------------------------------------|------------------------------|------------------|--------------|-------------------------------------------------------------------------------------------------------------------------------|--------------------|
| Wkba O <sup>142</sup>  | 2013, Ghana, West                      | ART clinic at the regional hospital  | 442  | HIV (276) HAART-naïve patients 166 on HAART | Age (years): HAART-naïve (33.42 ± 0.88), On HAART (36.91 ± 0.77)<br>Male gender: HAART-naïve (28.3%), On                                                        | eGFR < 60 mL/min/1.73 m <sup>2</sup> for > 3months                                                                                                      | CG, 186 MDRD, CKD-EPI        | Kinetic Jaffe    | Not measured | <b>Total prevalence (CKD-EPI): 10.2%</b><br>HAART naïve: 8.7% CG, 9.1% MDRD, <b>8.7%</b><br><b>CKD-EPI</b><br>On HAART: 14.5% | Low                |
| Stöhr W <sup>143</sup> | 2011, Uganda, Zimbabwe, East and South | Three centers in Uganda and Zimbabwe | 3316 | HIV-infected patients initiating ART        | Age (years): 36.8 (32-42.2)<br>Male gender: 35%<br>SBP: median:110 (IQR:100-120) mmHg<br>DBP: median:70 (60-80) mmHg<br>BMI: 21.1 (19.1–23.6) kg/m <sup>2</sup> | eGFR<60 ml/min/1.73 m <sup>2</sup> on ≥ 2 consecutive visits 80 days apart or confirmed 25% decrease if eGFR <60 ml/min/1.73 m <sup>2</sup> at baseline | CG                           | Kinetic Jaffe    | Not measured | <b>Total prevalence : 7.2%</b>                                                                                                | Medium             |
| Stöhr W <sup>144</sup> | 2008, Uganda, Zimbabwe, Uganda and     | Three centers in Uganda and          | 3316 | HIV-infected patients on ART                | Age (years): 36.8 (32-42.2)<br>Male gender: 35%                                                                                                                 | eGFR<60 ml/min 1.73 m <sup>2</sup> on ≥ 2 consecutive                                                                                                   | 186 MDRD, CG                 | Kinetic Jaffe    | Not measured | <b>Total prevalence (MDRD):3.1%</b> , CG 7.4%                                                                                 | Medium             |



1  
2  
3  
4  
5  
6  
7  
8  
9  
10  
11  
12  
13  
14  
15  
16  
17  
18  
19  
20  
21  
22  
23  
24  
25  
26  
27  
28  
29  
30  
31  
32  
33  
34  
35  
36  
37  
38  
39  
40  
41  
42  
43  
44  
45  
46  
47  
48  
49

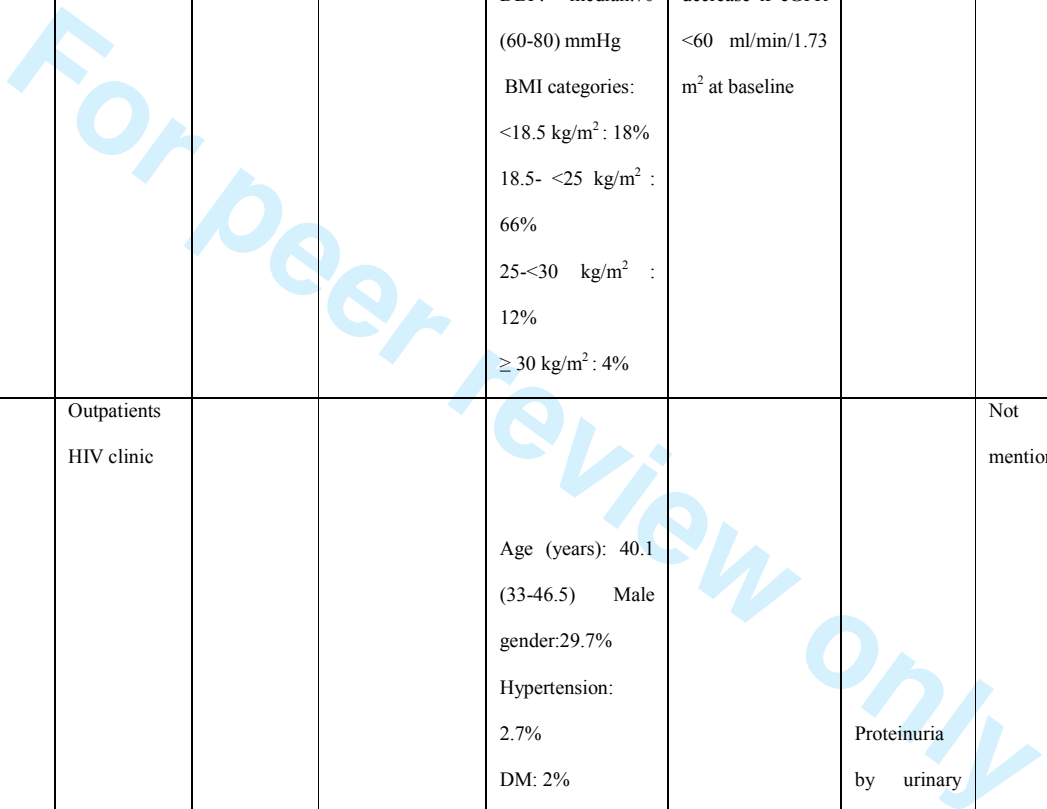

|  |                     |                        |     |                       |                                                                                                                                                                                                                             |                                                                                                       |                                           |               |                        |       |                                                                                                                                                                               |        |
|--|---------------------|------------------------|-----|-----------------------|-----------------------------------------------------------------------------------------------------------------------------------------------------------------------------------------------------------------------------|-------------------------------------------------------------------------------------------------------|-------------------------------------------|---------------|------------------------|-------|-------------------------------------------------------------------------------------------------------------------------------------------------------------------------------|--------|
|  | East and South      | Zimbabwe               |     |                       | SBP: median:110 (IQR:100-120) mmHg<br>DBP: median:70 (60-80) mmHg<br>BMI categories:<br><18.5 kg/m <sup>2</sup> : 18%<br>18.5- <25 kg/m <sup>2</sup> : 66%<br>25-<30 kg/m <sup>2</sup> : 12%<br>≥ 30 kg/m <sup>2</sup> : 4% | occasions >80 days apart or confirmed 25% decrease if eGFR <60 ml/min/1.73 m <sup>2</sup> at baseline |                                           |               |                        |       |                                                                                                                                                                               |        |
|  |                     | Outpatients HIV clinic |     |                       | Age (years): 40.1 (33-46.5) Male gender:29.7%<br>Hypertension: 2.7%<br>DM: 2%<br>BMI: median: 21.8 (19.3-24.2) kg/m <sup>2</sup>                                                                                            |                                                                                                       | Proteinuria by urinary strip, CG, 186MDRD | Not mentioned |                        | 6.10% | <b>Total prevalence (MDRD): 45.7%</b><br>GG: 46.5%<br><b>Prevalence by Stages ( using MDRD)</b><br>Stage 1: 30.2%<br>Stage 2:13.5%<br>Stage 3: 2%<br>Stage 4 & 5: no patients | Medium |
|  | 2011, Burundi, East | Outpatient HIV clinic  | 300 | HIV-infected patients |                                                                                                                                                                                                                             |                                                                                                       |                                           |               |                        |       |                                                                                                                                                                               |        |
|  | 2014, Congo,        | Outpatient HIV clinic  | 235 | HIV-infected patients | Age (years): 40.0 ± 10.7                                                                                                                                                                                                    | Proteinuria ≥ +1 by urinary strip or                                                                  | Proteinuria by urinary                    | Not measured  | Proteinuria ≥+1: 41.3% |       | <b>Total prevalence ( based on</b>                                                                                                                                            | Low    |

1  
2  
3  
4  
5  
6  
7  
8  
9  
10  
11  
12  
13  
14  
15  
16  
17  
18  
19  
20  
21  
22  
23  
24  
25  
26  
27  
28  
29  
30  
31  
32  
33  
34  
35  
36  
37  
38  
39  
40  
41  
42  
43  
44  
45  
46  
47  
48  
49

|                         |                                        |                                                |      |  |                                                                                                                                                                                                                       |                                                                                                                                                            |                                      |               |              |                              |                                                                  |     |
|-------------------------|----------------------------------------|------------------------------------------------|------|--|-----------------------------------------------------------------------------------------------------------------------------------------------------------------------------------------------------------------------|------------------------------------------------------------------------------------------------------------------------------------------------------------|--------------------------------------|---------------|--------------|------------------------------|------------------------------------------------------------------|-----|
|                         | Central                                |                                                |      |  | Male gender: 27.8%<br>Hypertension: 46.8%<br>DM: 1.7%<br>BMI: 22.3 ± 3.8 kg/m <sup>2</sup>                                                                                                                            | albuminuria ≥30 mg/dl                                                                                                                                      | strip and ACR                        |               |              | <b>proteinuria): 41.3 %</b>  |                                                                  |     |
|                         |                                        | Three centres in Uganda and Zimbabwe           |      |  | age(years): 36.8 (IQR: 32.0–42.2)<br>male gender: 35%<br>SBP: median:110 (IQR: 100-120) mmHg<br>DBP: median:70 (IQR: 60-80) mmHg<br>HIV-infected, ART-naïve adults with CD4+ cell counts of<200 cells/mm <sup>3</sup> | eGFR<60 ml/min 1.73 m <sup>2</sup> on ≥2 consecutive occasions >80 days apart or confirmed 25% decrease if eGFR <60 ml/min/1.73 m <sup>2</sup> at baseline |                                      | Kinetic Jaffe |              | <b>Total prevalence : 7%</b> | Medium                                                           |     |
| Reid A <sup>145</sup>   | 2008, Uganda, Zimbabwe, East and South |                                                | 3316 |  |                                                                                                                                                                                                                       |                                                                                                                                                            | CG                                   |               | Not measured |                              |                                                                  |     |
|                         |                                        | HIV outpatient clinic at Johannesburg Hospital |      |  | Age (years): 37 (range 16–70 years)<br>Male gender: 38%<br>DM: 4.6% among patients                                                                                                                                    | Proteinuria ≥ +1 by urinary strip or albuminuria ≥30 mg/dl                                                                                                 | Proteinuria by urinary strip and PCR |               | Not measured | 43.7% had proteinuria        | <b>Total prevalence (based on proteinuria prevalence): 43.7%</b> | Low |
| Fabian J <sup>108</sup> | 2009, South Africa, South              |                                                | 578  |  |                                                                                                                                                                                                                       |                                                                                                                                                            |                                      |               |              |                              |                                                                  |     |

|                        |                      |                                                                                         |      |                                                                          |                                                                                                               |                                                                                |                                                          |                        |              |                                                                                                                                     |        |
|------------------------|----------------------|-----------------------------------------------------------------------------------------|------|--------------------------------------------------------------------------|---------------------------------------------------------------------------------------------------------------|--------------------------------------------------------------------------------|----------------------------------------------------------|------------------------|--------------|-------------------------------------------------------------------------------------------------------------------------------------|--------|
|                        |                      |                                                                                         |      |                                                                          | group with microalbuminuria                                                                                   |                                                                                |                                                          |                        |              |                                                                                                                                     |        |
| Lucas G <sup>154</sup> | 2010, Uganda, East   | All consenting individuals residing in every household in 50 Rakai District communities | 1960 | 1202 HIV-infected patients and 664 HIV -ve age- and sex-matched controls | Age (years): HIV-ve, 28 (IQR: 24–35), HIV+ve: 30 (IQR: 25–36)<br>Male gender: HIV-ve: (38.7%), HIV+ve (36.4%) | eGFR < 60ml/min/1.73 m <sup>2</sup>                                            | MDRD                                                     | IDMS-calibrated        | Not measured | <b>Total prevalence among HIV+ve : 0.7%</b>                                                                                         | Medium |
| Yao J <sup>160</sup>   | 2011, sub-Saharan,   | Primary health care units                                                               | 2495 | HIV-infected patients before ART                                         | Age (years): 30 (IQR: 27–35)<br>Male gender: 30%<br>BMI: 22.8 (IQR: 20.4–25.6) kg/m <sup>2</sup>              | CrCl < 50 ml/min                                                               | CG, 186 MDRD, CKD-EPI                                    | Not mentioned          | Not measured | <b>Total prevalence (CKD-EPI with coefficient for black race): 2.5%</b><br>CG: 3.4%<br>(MDRD with coefficient for black race): 2.5% | Medium |
| Longo A <sup>99</sup>  | 2012, Congo, Central | Consecutive HIV patients from clinic                                                    | 300  | HIV-infected (ART treated=264) (ART naïve =36)                           | Age (years): 43 ± 9<br>Male gender: 23%<br>Hypertension: 13%                                                  | eGFR < 60 ml/min/1.73 m <sup>2</sup> / or proteinuria defined as 1+ or greater | proteinuria by dipstick and 24-hour proteinuria, eGFR by | Kinetic Jaffe and IDMS | 20.50%       | <b>Total prevalence : 20.5%</b><br><b>3% of the patients had eGFR &lt; 60 ml/min/1.73 m<sup>2</sup> by</b>                          | Low    |

1  
2  
3  
4  
5  
6  
7  
8  
9  
10  
11  
12  
13  
14  
15  
16  
17  
18  
19  
20  
21  
22  
23  
24  
25  
26  
27  
28  
29  
30  
31  
32  
33  
34  
35  
36  
37  
38  
39  
40  
41  
42  
43  
44  
45  
46  
47  
48  
49

|                         |                                        |                                                                                                    |      |                                          |                                                                                                                                |                                                                                                              |                                                                                     |                  |                 |                                                        |        |
|-------------------------|----------------------------------------|----------------------------------------------------------------------------------------------------|------|------------------------------------------|--------------------------------------------------------------------------------------------------------------------------------|--------------------------------------------------------------------------------------------------------------|-------------------------------------------------------------------------------------|------------------|-----------------|--------------------------------------------------------|--------|
|                         |                                        |                                                                                                    |      |                                          | BMI: 24 ± 5<br>(kg/m <sup>2</sup> )                                                                                            |                                                                                                              | MDRD, CG                                                                            |                  |                 | <b>MDRD</b>                                            |        |
| Farfo F <sup>109</sup>  | 2013,<br>Ghana,<br>West                | HIV clinic                                                                                         | 3137 | HIV-infected<br>patients starting<br>ART | Age (years): 38<br>(32-45)<br>Male gender: 33%<br>BMI: 20.3 (IQR:<br>17.6-22.7) kg/m <sup>2</sup>                              | eGFR <60<br>ml/min/1.73 m <sup>2</sup> ;<br>or proteinuria<br>≥+ 1<br>(confirmed by<br>uPCR > 45<br>mg/mmol) | Proteinuria<br>by urinary<br>strip, ACR,<br>PCR, eGFR<br>by CG,<br>MDRD,<br>CKD-EPI | Not<br>mentioned |                 | <b>Total prevalence<br/>(CKD-EPI): 13.8%</b>           | Low    |
| Gupta S <sup>161</sup>  | 2011,<br>Cameroon,<br>Central-<br>West | Electronic<br>medical<br>records of<br>patients from<br>18 sites<br>throughout<br>Western<br>Kenya | 7383 | HIV patients<br>without ART              | Age (years): 35.5<br>(29.3-44.0)<br>Male gender:<br>26.9%                                                                      | eGFR <60<br>ml/min/1.73 m <sup>2</sup>                                                                       | CG, MDRD                                                                            | Not<br>mentioned |                 | <b>Total prevalence<br/>(MDRD): 9.4%<br/>CG: 20.2%</b> | Medium |
| Ekant MH <sup>146</sup> | 2013,<br>Congo,<br>Central             | Ambulatory<br>Treatment<br>Center                                                                  | 562  | Newly diagnosed<br>HIV patients          | Age (years): 38.84<br>(IQR: 33.18-<br>46.23)<br>Male gender:<br>33.9%<br>BMI: 20.31 (IQR:<br>17.97-22.89)<br>kg/m <sup>2</sup> | eGFR < 60<br>ml/min/1.73m <sup>2</sup>                                                                       | 186MDRD                                                                             | Kinetic<br>Jaffe | Not<br>measured | <b>Total prevalence<br/>: 8.5%</b>                     | Low    |

1  
2  
3  
4  
5  
6  
7  
8  
9  
10  
11  
12  
13  
14  
15  
16  
17  
18  
19  
20  
21  
22  
23  
24  
25  
26  
27  
28  
29  
30  
31  
32  
33  
34  
35  
36  
37  
38  
39  
40  
41  
42  
43  
44  
45  
46  
47  
48  
49

|                                  |                     |                                                                             |     |                                         |                                                                                                                                                                                            |                                                                                                |                                                             |               |                                                           |                                                                                          |        |
|----------------------------------|---------------------|-----------------------------------------------------------------------------|-----|-----------------------------------------|--------------------------------------------------------------------------------------------------------------------------------------------------------------------------------------------|------------------------------------------------------------------------------------------------|-------------------------------------------------------------|---------------|-----------------------------------------------------------|------------------------------------------------------------------------------------------|--------|
| Wools-Kaloustian K <sup>80</sup> | 2007, Kenya, East   | Academic Model for the Prevention and Treatment of HIV/AIDS (AMPATH) clinic | 373 | HIV-infected patients naive to ART      | Age (years): 35.0 (range, 19–60)<br>Male gender: 32.1%<br>SBP: 104.7 (range, 80–140) mm/Hg                                                                                                 | CrCl<60 ml/min/1.73 m <sup>2</sup>                                                             | proteinuria by urinary strip, CG, full and abbreviated MDRD | Kinetic assay | 6.2% (proteinuria ≥1+)                                    | <b>Total prevalence :11.50%</b>                                                          | Low    |
| Emem C <sup>81</sup>             | 2008, Nigeria, West | HIV/AIDS outpatient clinic                                                  | 400 | HIV-infected patients                   | Age (years): 34.6 ± 9.4<br>Male gender: 48.5%<br>Hypertension: 13.2%<br>BMI categories: <19.0 kg/m <sup>2</sup> : 59.2%<br>19-25 kg/m <sup>2</sup> : 37.5%<br>>25 kg/m <sup>2</sup> : 3.3% | albuminuria +1 or on at least two occasions (4 weeks apart) and or serum creatinine >1.5 mg/dl | Proteinuria by urinary strip and 24 hours proteinuria , CG  | Not mentioned | 38% proteinuria with dipstick nephrotic range proteinuria | <b>Total prevalence :38.8 %</b><br>Among patients; 8.8% had CrCl <15 ml/min.             | Medium |
| Wyatt C <sup>82</sup>            | 2011, Rwanda, East  | Community based                                                             | 891 | 677 HIV-infected and 214 HIV-uninfected | Age (years): 34 (IQR: 30–39) HIV +ve/43 (IQR:34–50) HIV -ve<br>Male gender: 0                                                                                                              | eGFR<60 ml/min/1.73 m <sup>2</sup> / or proteinuria +1 or greater                              | proteinuria by urinary strip, eGFR by MDRD, CKD-EPI,        | Kinetic Jaffe | (9% among HIV + and 7.2% among non-infected)              | <b>Total prevalence among HIV +ve:9%</b><br>2.7% had eGFR< 60 ml/min/1.73 m <sup>2</sup> | Medium |

1  
2  
3  
4  
5  
6  
7  
8  
9  
10  
11  
12  
13  
14  
15  
16  
17  
18  
19  
20  
21  
22  
23  
24  
25  
26  
27  
28  
29  
30  
31  
32  
33  
34  
35  
36  
37  
38  
39  
40  
41  
42  
43  
44  
45  
46  
47  
48  
49



|                             |                                         |                                                     |     |                                                                    |                                                                                                                                                      |                                                                                                                                                                             |                                                                |                  |       |                                                                                                                          |     |
|-----------------------------|-----------------------------------------|-----------------------------------------------------|-----|--------------------------------------------------------------------|------------------------------------------------------------------------------------------------------------------------------------------------------|-----------------------------------------------------------------------------------------------------------------------------------------------------------------------------|----------------------------------------------------------------|------------------|-------|--------------------------------------------------------------------------------------------------------------------------|-----|
|                             |                                         |                                                     |     |                                                                    | Hypertension:<br>HIV+ve: 4.8%/<br>HIV-ve: 8.3%<br>BMI (kg/m <sup>2</sup> ):<br>HIV+ve: 20.9<br>(IQR: 19.0–23.3)/<br>HIV-ve: 20.5<br>(IQR: 18.5–23.3) |                                                                                                                                                                             | CG                                                             |                  |       | CKD prevalence<br>among HIV-ve:<br>7.2%<br>1.5% had eGFR<<br>60 ml/min/1.73 m <sup>2</sup>                               |     |
| olefackKaze F <sup>83</sup> | 2013,<br>Cameroon,<br>Central –<br>West | HIV clinic of<br>Yaoundé<br>general<br>hospital     | 104 | All newly<br>diagnosed HIV-<br>infected patients<br>naïve to HAART | Age (years):<br>35±10.7<br>Male gender: 32%                                                                                                          | The presence of<br>proteinuria +1 or<br>more and eGFR<<br>60 ml/min based<br>on the average of<br>eGFR by 2<br>equations                                                    | Proteinuria<br>by urinary<br>strip, eGFR<br>by CG, 175<br>MDRD | Kinetic<br>Jaffe | 36%   | <b>Total prevalence<br/>:36%</b><br>Among patients;<br>3% had eGFR< 60<br>ml/min/1,73 m <sup>2</sup>                     | Low |
| struik G <sup>84</sup>      | 2011,<br>Malawi,<br>East                | ART clinic in<br>a central<br>hospital in<br>Malawi | 526 | Consecutive<br>newly referred<br>HIV-infected<br>patients on ART   | Age (years): 34.3<br>± 9.3;<br>Male gender:<br>43.5%<br>Hypertension:<br>11.2%<br>DM: 0.8%                                                           | any proteinuria<br>(≥+1);<br>heavy proteinuria<br>( ≥+2); any<br>proteinuria (≥ +1)<br>with renal<br>dysfunction (e<br>GFR <60<br>ml/min/1.73 m <sup>2</sup> )<br>and heavy | Proteinuria<br>by urinary<br>strip, eGFR<br>by CG and<br>MDRD  | Not<br>mentioned | 23.3% | <b>Total prevalence:<br/>23.3%</b><br><b>Among patients<br/>with proteinuria;<br/>5.3% had CrCl&lt;<br/>60 ml/minute</b> | Low |

1  
2  
3  
4  
5  
6  
7  
8  
9  
10  
11  
12  
13  
14  
15  
16  
17  
18  
19  
20  
21  
22  
23  
24  
25  
26  
27  
28  
29  
30  
31  
32  
33  
34  
35  
36  
37  
38  
39  
40  
41  
42  
43  
44  
45  
46  
47  
48  
49

For peer review only

|                          |                       |                                                         |     |                                              |                                       |                                                                                                                                                      |                                                      |               |                                     |                                                                                              |     |
|--------------------------|-----------------------|---------------------------------------------------------|-----|----------------------------------------------|---------------------------------------|------------------------------------------------------------------------------------------------------------------------------------------------------|------------------------------------------------------|---------------|-------------------------------------|----------------------------------------------------------------------------------------------|-----|
|                          |                       |                                                         |     |                                              |                                       | proteinuria ( $\geq 2$ ) with renal dysfunction (CrCl < 60 mL/minute) and the absence of any alternative cause for renal dysfunction or proteinuria. |                                                      |               |                                     |                                                                                              |     |
| Attolou V <sup>118</sup> | 1998, Benin, West     | National Central hospital                               | 92  | HIV-infected patients                        | Age(years): 22±4<br>Male gender: 68 % | Proteinuria > 0.5 g/24 hrs and SCr>14 mg/l                                                                                                           | Serum creatinine measurement and 24-hour proteinuria | Not mentioned | Proteinuria >0.5 g/24 hrs in 23.33% | <b>Total prevalence:27.16%</b>                                                               | Low |
| Agaba EI <sup>170</sup>  | 2003, Nigeria, West   | infections unit of the Jos University Teaching Hospital | 126 | Consecutive 79 AIDS patients and 57 controls |                                       | Not known                                                                                                                                            | Not known                                            | Not known     | 25% (AIDS group)                    | <b>Total prevalence among AIDS group:51.80%</b><br>CKD prevalence among control group: 12.2% | Low |
| Fana GT <sup>100</sup>   | 2011, Zimbabwe, South | Outpatient clinics                                      | 159 | HIV-infected patients naïve to ART           |                                       | CrCl < 60 ml/min.<br>Proteinuria $\geq +1$ and/or PCR > 20                                                                                           | Proteinuria by urinary strip and 24-hour             | Not mentioned | 45.90%                              | <b>Total prevalence : 45.9%</b><br>Among patients; 7.50% had CrCl<                           | Low |

1  
2  
3  
4  
5  
6  
7  
8  
9  
10  
11  
12  
13  
14  
15  
16  
17  
18  
19  
20  
21  
22  
23  
24  
25  
26  
27  
28  
29  
30  
31  
32  
33  
34  
35  
36  
37  
38  
39  
40  
41  
42  
43  
44  
45  
46  
47  
48  
49

|  |                              |                      |     |                                            |                                                                   |                                                                                                             |                                                                   |                             |                                |                                                                     |                                |     |
|--|------------------------------|----------------------|-----|--------------------------------------------|-------------------------------------------------------------------|-------------------------------------------------------------------------------------------------------------|-------------------------------------------------------------------|-----------------------------|--------------------------------|---------------------------------------------------------------------|--------------------------------|-----|
|  |                              |                      |     |                                            |                                                                   | mg/mg                                                                                                       | proteinuria,<br>eGFR by CG                                        |                             |                                | 60 ml/min                                                           |                                |     |
|  |                              | Medical center       |     |                                            |                                                                   | Microalbuminuria > urinary protein                                                                          |                                                                   | Not mentioned               |                                |                                                                     | Low                            |     |
|  |                              |                      |     |                                            | Age (years): 31(range,13-63)                                      | 30 and 300 mg/24 h.                                                                                         |                                                                   |                             |                                |                                                                     |                                |     |
|  |                              |                      |     |                                            | Male gender: 25%                                                  | A cut-off serum creatinine level of 250 mmol/l was used to exclude those patients with advanced nephropathy | Proteinuria by urinary strip and 24-hour proteinuria, CG and MDRD |                             |                                |                                                                     |                                |     |
|  | 2006, South Africa, South    |                      | 615 | HIV patients not on ART                    | 117±14/70±9                                                       | 121±15/81±10                                                                                                |                                                                   |                             | 6%                             | <b>Total prevalence (based on proteinuria): 6%</b>                  |                                |     |
|  | 2008, Uganda, East           | Home-Based AIDS Care | 508 | HIV patients starting HAART                | Age (years): 39 (median)                                          | CrCl of 25–50 ml/min                                                                                        | CG, 175 MDRD                                                      | Kinetic Jaffe               | Not measured                   | <b>Total prevalence: 20%</b>                                        | Low                            |     |
|  | 2011, Cameroon, Central-West | Clinics              | 389 | 199 HIV +ve and 190 HIV -ve pregnant women | Age (years): HIV+ve (27 (IQR: 24- 31)), HIV-ve (27 (IQR: 22 -31)) | Male gender: 0                                                                                              | Proteinuria (PCR > 200 mg/g)                                      | Not measured                | HIV+ve: 39.2%<br>HIV-ve: 20.9% | <b>Total prevalence among HIV+ve (based on proteinuria ): 39.2%</b> | Medium                         |     |
|  | 2011, Tanzania, East         | Outpatient clinics   | 355 | HIV-infected patients naïve to ART         | Age (years): 36.1 ±7.9                                            | Male gender: 35%                                                                                            | KDOQI                                                             | Proteinuria and albuminuria | Not mentioned                  | 36% proteinuria ≥                                                   | <b>Total prevalence: 85.6%</b> | Low |



1  
2  
3  
4  
5  
6  
7  
8  
9  
10  
11  
12  
13  
14  
15  
16  
17  
18  
19  
20  
21  
22  
23  
24  
25  
26  
27  
28  
29  
30  
31  
32  
33  
34  
35  
36  
37  
38  
39  
40  
41  
42  
43  
44  
45  
46  
47  
48  
49

|                          |                                 |                                                         |       |                                                                                                                        |                                                                                                                         |                                       |                                            |                                                     |                                               |        |
|--------------------------|---------------------------------|---------------------------------------------------------|-------|------------------------------------------------------------------------------------------------------------------------|-------------------------------------------------------------------------------------------------------------------------|---------------------------------------|--------------------------------------------|-----------------------------------------------------|-----------------------------------------------|--------|
|                          |                                 |                                                         |       |                                                                                                                        | BMI (kg/m <sup>2</sup> ): 21.3<br>±3.8                                                                                  |                                       | by urinary<br>strip eGFR<br>by CG,<br>MDRD | +1                                                  |                                               |        |
| Myer L <sup>162</sup>    | 2013, South<br>Africa,<br>South | primary<br>healthcare<br>clinic                         | 1861  | Consecutive 238<br>pregnant women,<br>1014 non-<br>pregnant, 609<br>men; HIV-<br>infected patients<br>eligible for ART | Age (years):<br>pregnant, 28 (IQR:<br>25–32), men, 37<br>(IQR: 32–45),<br>women, 33 (IQR:<br>28–39)<br>Male gender: 33% | CrCl< 60ml/min                        | Absolute Scr<br>and CG                     | Not<br>mentioned<br><br>Not<br>measured             | <b>Total prevalence:<br/>5.8%</b>             | Low    |
| Mulenga L <sup>163</sup> | 2008,<br>Zambia,<br>South       | Clinic                                                  | 25249 | HIV-infected,<br>ART-naïve<br>adults initiating<br>treatment                                                           | Age (years):<br>normal CrCl,<br>33.7±7.9,<br>decreased CrCl,<br>38.5±9.9<br>Male gender:<br>39.7%                       | CrCl< 60 ml/min                       | Absolute<br>Scr, eGFR<br>by CG and<br>MDRD | Not<br>mentioned<br><br>Not<br>measured             | <b>Total prevalence<br/>(MDRD): 3.2%</b><br>: | Medium |
| Adedeji T <sup>158</sup> | 2015,<br>Nigeria,<br>West       | The<br>University<br>of Ilorin<br>Teaching<br>hospital, | 183   | Newly diagnosed<br>HIV-infected<br>ART naïve<br>patients                                                               | Age (years): 37.9+<br>10.5<br>Male gender:<br>42.6%<br>BMI (kg/m <sup>2</sup> ):<br>20.88+ 3.56                         | eGFR< 60<br>ml/min/1.73m <sup>2</sup> | Absolute<br>Scr, eGFR<br>by MDRD           | Kinetic<br>Jaffe and<br>IDMS<br><br>Not<br>measured | <b>Total prevalence:<br/>24%</b>              | Low    |

1  
2  
3  
4  
5  
6  
7  
8  
9  
10  
11  
12  
13  
14  
15  
16  
17  
18  
19  
20  
21  
22  
23  
24  
25  
26  
27  
28  
29  
30  
31  
32  
33  
34  
35  
36  
37  
38  
39  
40  
41  
42  
43  
44  
45  
46  
47  
48  
49

|                                                                 |                                                                                                          |            |                                                                                                                                     |                                                                                                                                                                                                                                                                       |                                                                                      |                                                                                  |                                                                                                  |                                                                                                                       |            |
|-----------------------------------------------------------------|----------------------------------------------------------------------------------------------------------|------------|-------------------------------------------------------------------------------------------------------------------------------------|-----------------------------------------------------------------------------------------------------------------------------------------------------------------------------------------------------------------------------------------------------------------------|--------------------------------------------------------------------------------------|----------------------------------------------------------------------------------|--------------------------------------------------------------------------------------------------|-----------------------------------------------------------------------------------------------------------------------|------------|
| <p>2016,<br/>Nigeria,<br/>West<br/>nyabolu E<sup>135</sup></p>  | <p>Federal<br/>Medical<br/>Centre</p>                                                                    | <p>529</p> | <p>393 newly<br/>diagnosed drug-<br/>naïve HIV<br/>patients, 136 age<br/>and sex matched<br/>HIV-<br/>seronegative<br/>controls</p> | <p>Age (years); 38.84<br/>± 10.65<br/>Male gender: 28%<br/>BMI categories:<br/>&lt;18.5.0 kg/m<sup>2</sup>: 7%<br/>18.5-24.9 kg/m<sup>2</sup>:<br/>35%<br/>25-29.9 kg/m<sup>2</sup>:<br/>32%<br/>≥ 30 kg/m<sup>2</sup>:23%</p>                                        | <p>24-hours urine<br/>protein ≥0.300 g<br/>and/or GFR &lt;60<br/>ml/min</p>          | <p>Quantitative<br/>assessment<br/>of<br/>protienuria,<br/>Scr, and<br/>eGFR</p> | <p>Not<br/>mentioned<br/><br/><br/><br/><br/><br/><br/><br/><br/><br/><br/>Not<br/>mentioned</p> | <p><b>Total prevalence<br/>among HIV +ve<br/>patients:22.9%</b><br/><br/>Prevalence among<br/>HIV -ve: 8.1%</p>       | <p>Low</p> |
| <p>2015,<br/>Nigeria,<br/>West<br/>Ayokunle D<sup>113</sup></p> | <p>Medical Out-<br/>patient<br/>Department<br/>of University<br/>of Ilorin<br/>Teaching<br/>Hospital</p> | <p>335</p> | <p>227 newly-<br/>diagnosed, ART<br/>naïve patients<br/>with<br/>HIV/AIDS,<br/>108age and sex<br/>matched control<br/>group</p>     | <p>Age (years): 40.3<br/>± 10.3<br/>Male gender: 44%<br/>BMI (kg/m<sup>2</sup>): 20.5<br/>± 4.8 among HIV<br/>patients , 26.7 ±<br/>5.3 among control<br/>group<br/>SBP(mmHg):<br/>111.9 ± 1 among<br/>HIV patients,<br/>126.1 ± 12.0<br/>among control<br/>group</p> | <p>albuminuria ≥ 30<br/>mg/g and/or<br/>eGFR &lt; 60<br/>ml/ml/1.73m<sup>2</sup></p> | <p>Proteinuria<br/>by dipstick,<br/>and ACR<br/>and eGFR<br/>by MDRD</p>         | <p>Kinetic<br/>Jaffe<br/><br/><br/><br/><br/><br/><br/><br/><br/><br/><br/>Not<br/>mentioned</p> | <p><b>Total prevalence<br/>among HIV<br/>patients: 47.6%</b><br/><br/>The prevalence<br/>among HIV -ve:<br/>16.7%</p> | <p>Low</p> |

1  
2  
3  
4  
5  
6  
7  
8  
9  
10  
11  
12  
13  
14  
15  
16  
17  
18  
19  
20  
21  
22  
23  
24  
25  
26  
27  
28  
29  
30  
31  
32  
33  
34  
35  
36  
37  
38  
39  
40  
41  
42  
43  
44  
45  
46  
47  
48  
49

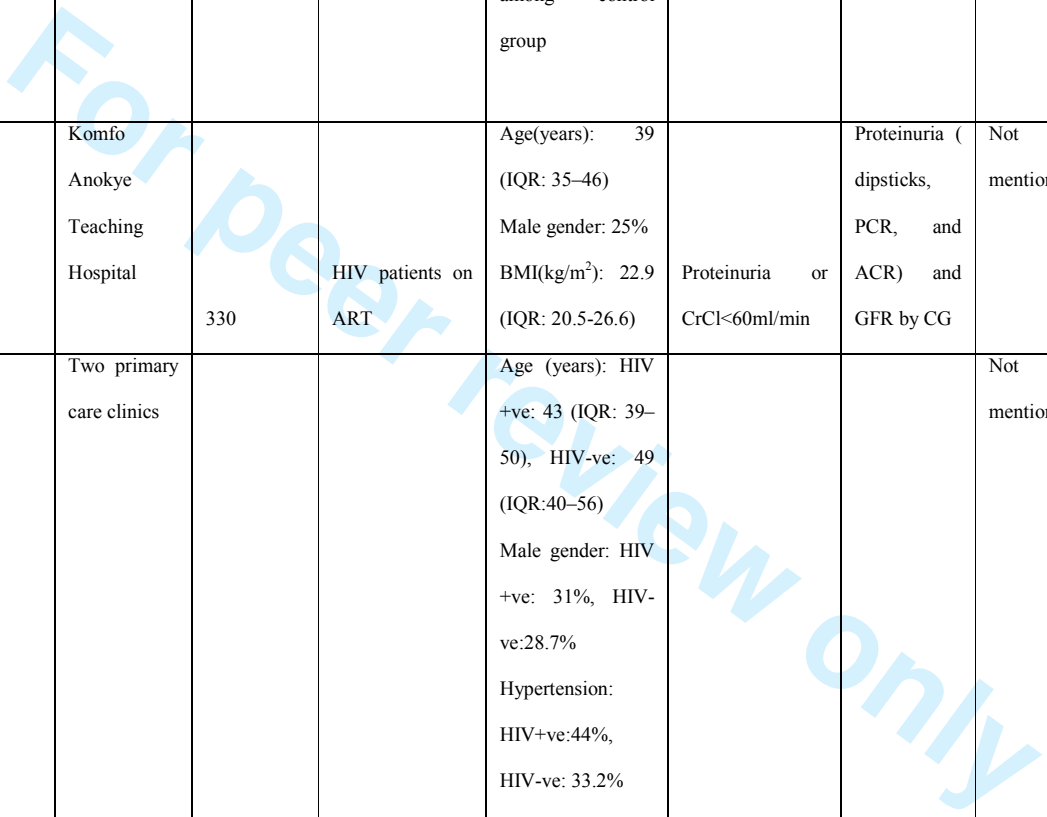

|                          |                   |                                |      |                                      |                                                                                                                                                                                                        |                              |                                                     |               |                                |                                                                            |        |
|--------------------------|-------------------|--------------------------------|------|--------------------------------------|--------------------------------------------------------------------------------------------------------------------------------------------------------------------------------------------------------|------------------------------|-----------------------------------------------------|---------------|--------------------------------|----------------------------------------------------------------------------|--------|
|                          |                   |                                |      |                                      | DBP(mmHg): 72.9<br>± 9.5 among HIV patients, 80.6 ± 6.8 among control group                                                                                                                            |                              |                                                     |               |                                |                                                                            |        |
| Shadwick D <sup>14</sup> | 2015, Ghana, West | Komfo Anokye Teaching Hospital | 330  | HIV patients on ART                  | Age(years): 39 (IQR: 35–46)<br>Male gender: 25%<br>BMI(kg/m <sup>2</sup> ): 22.9 (IQR: 20.5-26.6)                                                                                                      | Proteinuria or CrCl<60ml/min | Proteinuria (dipsticks, PCR, and ACR) and GFR by CG | Not mentioned | 37% by dipstick and 12% by PCR | <b>Total prevalence (proteinuria) : 37%</b><br>CrCl<60 ml/min among 7%     | Low    |
| EdwardsJ <sup>166</sup>  | 2015, Kenya, East | Two primary care clinics       | 2206 | 210 HIV+ve patients and 1996 HIV –ve | Age (years): HIV +ve: 43 (IQR: 39–50), HIV-ve: 49 (IQR:40–56)<br>Male gender: HIV +ve: 31%, HIV-ve:28.7%<br>Hypertension: HIV+ve:44%, HIV-ve: 33.2%<br>Diabetes mellitus: HIV +ve: 5% , HIV –ve: 15.2% | CrCl<60 ml/min               | eGFR by CKD-EPI                                     | Not mentioned | Not measured                   | <b>Total prevalence: 12.1%</b><br><b>HIV+ve: 17%</b><br><b>Hiv-ve: 11%</b> | Medium |

1  
2  
3  
4  
5  
6  
7  
8  
9  
10  
11  
12  
13  
14  
15  
16  
17  
18  
19  
20  
21  
22  
23  
24  
25  
26  
27  
28  
29  
30  
31  
32  
33  
34  
35  
36  
37  
38  
39  
40  
41  
42  
43  
44  
45  
46  
47  
48  
49

|                            |                             |                                   |      |                                                                     |                                                                                                         |                                         |                                                                  |                                            |              |                                                                                             |        |
|----------------------------|-----------------------------|-----------------------------------|------|---------------------------------------------------------------------|---------------------------------------------------------------------------------------------------------|-----------------------------------------|------------------------------------------------------------------|--------------------------------------------|--------------|---------------------------------------------------------------------------------------------|--------|
| Glaser N <sup>14</sup>     | 2016, Malawi, East          | Lighthouse Clinic                 | 363  | 116 HIV +ve ART-naïve patients and 247 HIV-ve patients              | Age (years): 31 (IQR:26–39)<br>Male gender: 52%                                                         | eGFR < 60 ml/min                        | eGFR by CG, MDRD, and CKD-EPI with and without correction factor | IDMS calibrated creatinine and cystatin-C  | Not measured | <b>Total prevalence among HIV+ve (creatinine based CKD-EPI):1.9%</b>                        | Medium |
| Glaser N <sup>15</sup>     | 2016, Malawi, East          | Lighthouse Clinic                 | 363  | 116 HIV +ve patients and 247 HIV –ve patients                       | Age (years): 34.1 ±10.9<br>Male gender: 52%<br>BMI(kg/m <sup>2</sup> ): 23.2±4.8<br>Hypertension: 13.5% | KDOQI                                   | Proteinuria by dipstick and ACR, eGFR by CG, MDRD, and CKD-EPI   | IDMS calibrated creatinine and cystatin -C | 12.1%        | <b>Total prevalence : 13%</b><br>Prevalence among HIV+ve:22%<br>Prevalence among HIV-ve: 9% | Medium |
| Kamkuemah M <sup>167</sup> | 2015, South Africa, South   | Gugulethu Community Health Centre | 1092 | HIV infected patients initiated ART therapy                         | Age (years): 34 (IQR: 29- 41)<br>Male gender: 38%                                                       | eGFR < 60 ml/min                        | eGFR by CG                                                       | Not mentioned                              | Not measured | <b>Total prevalence: 2%</b>                                                                 | Medium |
| Nsagha D <sup>149</sup>    | 2015, Cameroon Central-West | Government hospitals              | 200  | HIV patients on HAART, DOTS or on the combined therapy (HAART/DOTS) | Age (years): 38.04 ± 10.52<br>Male gender: 50.5%                                                        | eGFR <60 ml/min per 1.73 m <sup>2</sup> | eGFR by MDRD                                                     | Kinetic Jaffe                              | Not measured | <b>Total prevalence: 8%</b>                                                                 | Low    |

1  
2  
3  
4  
5  
6  
7  
8  
9  
10  
11  
12  
13  
14  
15  
16  
17  
18  
19  
20  
21  
22  
23  
24  
25  
26  
27  
28  
29  
30  
31  
32  
33  
34  
35  
36  
37  
38  
39  
40  
41  
42  
43  
44  
45  
46  
47  
48  
49

|                                                                |                                 |                                                                                 |     |                                                      |                                                                                            |                                                                                                                                         |                                                                                  |                  |                          |                                                                                             |        |
|----------------------------------------------------------------|---------------------------------|---------------------------------------------------------------------------------|-----|------------------------------------------------------|--------------------------------------------------------------------------------------------|-----------------------------------------------------------------------------------------------------------------------------------------|----------------------------------------------------------------------------------|------------------|--------------------------|---------------------------------------------------------------------------------------------|--------|
| 3<br>4<br>5<br>6<br>7<br>8<br>9<br>10<br>11<br>12<br>13<br>14  | 2015,<br>Uganda,<br>East        | infectious<br>diseases<br>clinic of<br>Gulu<br>Regional<br>Referral<br>Hospital | 361 | Newly diagnosed<br>HIV patients not<br>receiving ART | Age (years): 31.4<br>± 9.5<br>Male gender:<br>36.3%<br>BMI(kg/m <sup>2</sup> ) <18:<br>33% | eGFR <60<br>ml/min per 1.73<br>m <sup>2</sup>                                                                                           | Proteinuria<br>by dipstick<br>and eGFR<br>by MDRD                                | Not<br>mentioned | Proteinuria<br>≥ +1: 52% | <b>Total prevalence:</b><br><b>14.4%</b>                                                    | Low    |
| 15<br>16<br>17<br>18<br>19<br>20<br>21<br>22<br>23<br>24<br>25 | 2016,<br>Nigeria,<br>West       | University of<br>Benin<br>Teaching<br>Hospital                                  | 383 | HIV infected<br>naïve patients                       | Age (years): 36.03<br>± 9.08<br>Male gender: 41%                                           | eGFR <60<br>ml/min per 1.73<br>m <sup>2</sup> and/or<br>evidence of<br>kidney injury as<br>detected when the<br>PCR (mg/g) was<br>≥200. | Quantitative<br>assessment<br>of<br>proteinuria<br>by PCR and<br>eGFR by<br>MDRD | Kinetic<br>Jaffe | Not<br>mentioned         | <b>Total prevalence:</b><br><b>53.5%</b>                                                    | Low    |
| 26<br>27<br>28<br>29<br>30<br>31<br>32<br>33<br>34             | 2016, South<br>Africa,<br>South | Medical in-<br>patients at<br>the Chris<br>Hani<br>Baragwanath<br>Hospital      | 100 | HIV infected<br>naïve patients                       | Age (years):<br>37.0±9.6<br>Male gender: 60%<br>BMI(kg/m <sup>2</sup> ): 20.9<br>±5.1      | eGFR <60<br>ml/min per 1.73<br>m <sup>2</sup>                                                                                           | eGFR by<br>CG, MDRD,<br>CKD-EPI                                                  | IDMS             | Not<br>measured          | <b>Total prevalence:</b><br><b>16%</b>                                                      | Low    |
| 35<br>36<br>37<br>38<br>39<br>40                               | 2015, South<br>Africa,<br>South | Rural<br>Medical<br>Centre                                                      | 903 | HIV infected<br>adult patients                       | Age (years):<br>40(IQR:34-48)<br>Male gender: 31%<br>Diabetes mellitus:                    | Albuminuria or<br>eGFR <60<br>ml/min / 1.73 m <sup>2</sup>                                                                              | Albuminuria<br>by ACR and<br>eGFR by<br>MDRD and                                 | Not<br>mentioned | 21%                      | <b>Total prevalence</b><br><b>(albuminuria):</b><br><b>21%</b><br><b>2% had eGFR&lt; 60</b> | Medium |

1  
2  
3  
4  
5  
6  
7  
8  
9  
10  
11  
12  
13  
14  
15  
16  
17  
18  
19  
20  
21  
22  
23  
24  
25  
26  
27  
28  
29  
30  
31  
32  
33  
34  
35  
36  
37  
38  
39  
40  
41  
42  
43  
44  
45  
46  
47  
48  
49

|  |                           |                                                      |     |                                             |                                                                                                                                                                              |                                         |                          |               |              |                                |        |
|--|---------------------------|------------------------------------------------------|-----|---------------------------------------------|------------------------------------------------------------------------------------------------------------------------------------------------------------------------------|-----------------------------------------|--------------------------|---------------|--------------|--------------------------------|--------|
|  |                           |                                                      |     |                                             | 4%                                                                                                                                                                           |                                         | CKD-EPI                  |               |              | ml/min/1.73 m <sup>2</sup>     |        |
|  |                           |                                                      |     |                                             | Hypertension:<br>23%                                                                                                                                                         |                                         |                          |               |              |                                |        |
|  |                           | Outpatient infectious clinic at an academic hospital |     |                                             | Age (years):<br>37.9±9.4<br>Male gender:<br>35.5%<br>Diabetes mellitus:2.2%                                                                                                  |                                         |                          | IDMS          |              |                                | Medium |
|  | 2016, South Africa, South |                                                      | 650 | HIV infected patients initiating ART        | Hypertension:<br>7.8%                                                                                                                                                        | eGFR <60 ml/min per 1.73 m <sup>2</sup> | eGFR by MDRD and CKD-EPI |               | Not measured | <b>Total prevalence: 2 %</b>   |        |
|  |                           | Anchor H <sup>157</sup>                              |     |                                             |                                                                                                                                                                              |                                         |                          |               |              |                                |        |
|  |                           | Jimma University Specialized Hospital                |     |                                             | Age ( years):<br>HAART naïve:<br>38.25 ±10.8,<br>HAART +ve:<br>35.14 ±9.2<br>Male gender: 37%<br>BMI(kg/m <sup>2</sup> ) :<br>HAART naïve:<br>20.7±3.2, HAART +ve: 21.6 ±3.5 |                                         |                          | Kinetic Jaffe |              |                                | Medium |
|  | 2016, Ethiopia, East      |                                                      | 446 | (223 HAART naïve and 223 HAART experienced) | Hypertension:<br>3.36%<br>Diabetes mellitus:<br>21.4%                                                                                                                        | eGFR <60 ml/min per 1.73 m <sup>2</sup> | eGFR by CG               |               | Not measured | <b>Total prevalence: 18.2%</b> |        |
|  |                           | Mekuria Y <sup>150</sup>                             |     |                                             |                                                                                                                                                                              |                                         |                          |               |              |                                |        |



Table 4: Studies on CKD among diabetic patients

| Study ID                    | Year, Country, Region | Location                                                     | N   | Study group                   | Population Characteristics                                                                                                                                                                            | Definition of CKD                                                                                               | Method of outcome assessment                                | Creatinine assay | proteinuria                                        | CKD prevalence                                       | Quality assessment |
|-----------------------------|-----------------------|--------------------------------------------------------------|-----|-------------------------------|-------------------------------------------------------------------------------------------------------------------------------------------------------------------------------------------------------|-----------------------------------------------------------------------------------------------------------------|-------------------------------------------------------------|------------------|----------------------------------------------------|------------------------------------------------------|--------------------|
| Janmohamed MN <sup>86</sup> | 2013, Tanzania, East  | diabetes mellitus clinic of Bugando Medical Centre in Mwanza | 369 | Consecutive diabetic patients | Age (years): 54 (IQR: 45-62)<br>Male gender: 46.6%<br>Hypertension: 57.5%<br>BMI (kg/m <sup>2</sup> ): 25.6 (IQR: 22.6–29.6)<br>Duration of DM (years): 6(3 – 11)<br>93.8% type 2 DM<br>6.2% type 1DM | eGFR $\leq$ 60 ml/min/1.73 m <sup>2</sup> or evidence of kidney damage (microalbuminuria or overt proteinuria). | Microalbuminuria, proteinuria by urinary strips, eGFR by CG | Kinetic Jaffe    | Overt proteinuria (34.1%), microalbuminuria(45.8%) | <b>Total prevalence:83.7%</b>                        | Low                |
| Wanjohi FW <sup>87</sup>    | 2002, Kenya, East     | Outpatient diabetic clinic at Kenyatta National Hospital     | 100 | Type 2 diabetic patients      | Age (years): 53.7 $\pm$ 9.3<br>Male gender: 37%<br>Hypertension: 50%<br>BMI (kg/m <sup>2</sup> ): 27.8 $\pm$ 6.0<br>Duration of DM (months): 10.3 $\pm$ 7.5                                           | Albuminuria > 20 mg/ L                                                                                          | Albuminuria by urinary strip, CG                            | Not mentioned    | 26% had albuminuria                                | <b>Total prevalence( based on albuminuria ): 26%</b> | Low                |



|                          |                              |                                                                                         |     |                                                     |                                                                                                                                                |                                                                                                               |                                               |               |                                                       |                                |     |
|--------------------------|------------------------------|-----------------------------------------------------------------------------------------|-----|-----------------------------------------------------|------------------------------------------------------------------------------------------------------------------------------------------------|---------------------------------------------------------------------------------------------------------------|-----------------------------------------------|---------------|-------------------------------------------------------|--------------------------------|-----|
| Bouزيد C <sup>119</sup>  | 2011, Tunis, North           | Endocrinology center at the National Institute of nutrition                             | 689 | Type 2 diabetic patients from computerized hospital | Age (years): 60±11<br>Male gender: 39%<br>Hypertension: 84.6% (renal insufficiency), 57.2% (no renal disease)<br>Duration of DM (years): 11±8  | eGFR<60 ml/min                                                                                                | CG, 24-hour proteinuria                       | Not mentioned | 10.1%<br>macroalbuminuria,<br>13%<br>microalbuminuria | <b>Total prevalence: 19.8%</b> | Low |
| Choukem SP <sup>88</sup> | 2012, Cameroon, Central-West | Two main referral centres                                                               | 420 | Consecutive type 2 diabetic patients                | Age (years): 56.7 ±9.9<br>Male gender: 49%<br>Hypertension: 50%<br>BMI (kg/m <sup>2</sup> ): 28.5 ±5.2<br>Duration of DM (years): 4 (IQR: 1-9) | The presence of positive proteinuria with or without low CrCl < 90 ml/min/1.73 m <sup>2</sup>                 | Proteinuria by urinary strip/eGFR by CG       | Not mentioned |                                                       | <b>Total prevalence: 31%</b>   | Low |
| Keeton G <sup>120</sup>  | 2004, South Africa, South    | Groote Schuur Hospital Outpatients Diabetic Clinic or the Somerset Hospital Outpatients | 59  | Type 2 diabetic patients                            | Age (years): 62 ±9.4<br>Male gender: 36%<br>BMI (kg/m <sup>2</sup> ): (31± 6)<br>Duration of DM (years): 17 (Range: 14-33)                     | Double Scr level                                                                                              | Proteinuria by PCR, and serum creatinine      | Not mentioned |                                                       | <b>Total prevalence: 66.1%</b> | Low |
| BouAziz <sup>121</sup>   | 2012, Tunisia, North         | Basic Health Group of Sousse                                                            | 115 | 73 type 2 diabetic patients and 42 healthy          | Age (mean ±SE in years): 59.3 ±1.1<br>Male gender: 35%<br>SBP (mean ±SE mmHg): 136.3 ±3.1                                                      | Microalbuminuria (defined as < 2.8 g/mmol for women and < 2.3 for men) and eGFR≤60 ml/min/1.73 m <sup>2</sup> | Measurement of microalbuminuria, eGFR by MDRD | Not mentioned |                                                       | <b>Total prevalence: 11%</b>   | Low |

|                                |                             |                                           |     |                                                         |                                                                                                                                                                  |                         |                                                                        |                  |                                               |                                                                        |     |
|--------------------------------|-----------------------------|-------------------------------------------|-----|---------------------------------------------------------|------------------------------------------------------------------------------------------------------------------------------------------------------------------|-------------------------|------------------------------------------------------------------------|------------------|-----------------------------------------------|------------------------------------------------------------------------|-----|
|                                |                             |                                           |     | volunteers                                              | DBP (mean $\pm$ SE): 76.8<br>$\pm$ 1.9<br>BMI (mean $\pm$ SE in kg/m <sup>2</sup> ):<br>30.5 $\pm$ 0.7<br>Duration of DM (years):<br>10.6 $\pm$ 1                |                         |                                                                        |                  |                                               |                                                                        |     |
| Katchunga<br>P <sup>122</sup>  | 2010,<br>Congo,<br>Central  | Referral<br>general<br>hospital           | 98  | Medical<br>records of<br>type 2<br>diabetic<br>patients | Age (years): 58 $\pm$ 10.4<br>Male gender: 35.7%<br>Hypertension: 59.2%<br>BMI (kg/m <sup>2</sup> ): 25.2 $\pm$ 4.7<br>Duration of DM (years):<br>17.3 $\pm$ 8.5 | KDOQI                   | Microalbumin<br>uria (>20 mg/L<br>and <200<br>mg/L)<br>eGFR by<br>MDRD | Not<br>mentioned |                                               | <b>Total prevalence:<br/>66%</b>                                       | Low |
| Djrolo F <sup>123</sup>        | 2001, Benin,<br>West        | National<br>University<br>hospital centre | 152 | Type 1<br>and 2<br>diabetic<br>patients                 | Age (years): 53.3(range,<br>21-90)<br>Male gender: 65.8%<br>Duration of DM (years):<br><1 – 16 or more                                                           | Presence of proteinuria | 24-hour<br>proteinuria                                                 | Not<br>measured  | 28%                                           | <b>Total prevalence (<br/>based on<br/>proteinuria level):<br/>28%</b> | Low |
| Balogun<br>WO <sup>102</sup>   | 2011,<br>Nigeria,<br>West   | Tertiary<br>hospital                      | 40  | Randomly<br>selected<br>type 2<br>diabetic<br>patients  | Age (years): 59.4 $\pm$ 11.25<br>Male gender: 37.5%<br>Hypertension: 45%                                                                                         | not mentioned           | Proteinuria by<br>urinary strip<br>and 24 hrs,<br>eGFR by CG           | Jaffe<br>method  | 82.5%<br>macroalbuminuria                     | <b>Total prevalence:<br/>90%</b>                                       | Low |
| Mafundikwa<br>A <sup>103</sup> | 2007,<br>Zimbabwe,<br>South | Diabetic clinic                           | 75  | Consecuti<br>ve Insulin-<br>dependent                   | No available data                                                                                                                                                | No available data       | Proteinuria by<br>urinary strips<br>and 24-hour                        |                  | Overt proteinuria<br>21%.<br>Microalbuminuria | <b>Total prevalence:<br/>33%</b>                                       | Low |

|                         |                      |                                     |     |                                            |                                                                                                                                                                                                                                                  |                                                                                                                                                                                                                    |                                                    |               |                                                                                                                         |                                                                                                                      |        |
|-------------------------|----------------------|-------------------------------------|-----|--------------------------------------------|--------------------------------------------------------------------------------------------------------------------------------------------------------------------------------------------------------------------------------------------------|--------------------------------------------------------------------------------------------------------------------------------------------------------------------------------------------------------------------|----------------------------------------------------|---------------|-------------------------------------------------------------------------------------------------------------------------|----------------------------------------------------------------------------------------------------------------------|--------|
|                         |                      |                                     |     | diabetic patients                          |                                                                                                                                                                                                                                                  |                                                                                                                                                                                                                    | proteinuria                                        |               | 12%.                                                                                                                    |                                                                                                                      |        |
| Lutale J <sup>124</sup> | 2007, Tanzania, East | Outpatient diabetic clinic          | 204 | 91 Type 1 and 153 type 2 diabetic patients | 45% type 1 DM<br>55% type 2DM<br>Age (years): type 1, 21(14–44.8), type 2, 53 (23.5–85)<br>Male gender: 55%<br>hypertension: 42%<br>BMI (kg/m <sup>2</sup> ): 19.3 ± 3.8 (type 1), 27.8 ± 4.8 (type 2)<br>Duration of DM (years): 3(Range: 0-25) | KDOQI                                                                                                                                                                                                              | Quantitative assessment of albuminuria, CrCl by CG | Kinetic Jaffe | Type 1: microalbuminuria was 12.1% and macroalbuminuria 1.1%.<br>Type 2: microalbuminuria 9.8%<br>Macroalbuminuria 7.2% | <b>Total prevalence: 18.5%</b><br>4.6% of Type 1 patients and 22% of Type 2 had eGFR < 60 ml/min/1.73 m <sup>2</sup> | Low    |
| Gill G <sup>125</sup>   | 2008, Ethiopia, East | Diabetic clinic at Mekelle Hospital | 105 | All diabetic patients                      | Age (years): 41±16<br>Male gender: 70%<br>Hypertension: 5%<br>BMI (kg/m <sup>2</sup> ): 20.6 ±5.4<br>Duration of DM (years): 7±6                                                                                                                 | Nephropathy was considered present if the urinary ACR was >25.0mg/mmol and retinopathy was present. Microalbuminuria was diagnosed if the ACR was >2.5 and <25.0mg/mmol in men and >3.5 and <25.0mg/mmol in women. | ACR, Scr                                           | Not mentioned | 51% microalbuminuria                                                                                                    | <b>Total prevalence : 51%,</b>                                                                                       | Low    |
| Makulo R <sup>111</sup> | 2010, Congo, Central | Community based                     | 229 | 81 Diabetic and 148 impaired fasting       | Age (years): 53.1±16.3<br>Male gender: 33%<br>SBP (mmHg): 128.0±5.7<br>DBP (mmHg): 78.5±13.4<br>BMI (kg/m <sup>2</sup> ): 22.6±5.2                                                                                                               | eGFR of <60 mL/min/1.73 m <sup>2</sup>                                                                                                                                                                             | Urinary albumin by urinary strip and eGFR by       | Kinetic Jaffe | 29.6%                                                                                                                   | <b>Total prevalence: 29.6%</b><br>10% of the patients had eGFR< 60                                                   | Medium |

|                            |                                           |                                                                          |      | glucose patients                              |                                                                                                                                                                                                   |                                        | 186MDRD                                       |               |                                                | ml/min/1.73 m <sup>2</sup>                                                        |        |
|----------------------------|-------------------------------------------|--------------------------------------------------------------------------|------|-----------------------------------------------|---------------------------------------------------------------------------------------------------------------------------------------------------------------------------------------------------|----------------------------------------|-----------------------------------------------|---------------|------------------------------------------------|-----------------------------------------------------------------------------------|--------|
| Adebamowo S <sup>151</sup> | 2016, Nigeria, Ghana, Kenya (sub-Saharan) | University medical centers and surrounding communities                   | 4815 | 2208 Cases of type 2 DM and 2607 free from DM | Age (years): 48±15<br>Male gender:41%<br>Hypertension: ( 68.3% of type 2 DM, and 35.3% of diabetic-free)<br>BMI(kg/m <sup>2</sup> ): 26.9 ± 5.4 (diabetic patients)<br>25.5 ± 5.7 (non-diabetics) | eGFR of <60 ml/min/1.73 m <sup>2</sup> | eGFR by MDRD and CKD-EPI                      | Kinetic Jaffe | Not measured                                   | <b>Total prevalence (MDRD): 9%</b><br>13.4% of type 2DM and 4.8% of diabetic free | Medium |
| Feteh V <sup>95</sup>      | 2016, Cameroon, Central-West              | out-patient section of the endocrine unit of the Douala General Hospital | 636  | Cases of type 2 DM                            | Age (years): 56.5 ± 10.6<br>Male gender: 53.1%<br>BMI (kg/m <sup>2</sup> ): 29.3 ± 14.7<br>Hypertension: 62.2%                                                                                    | eGFR of <60 ml/min/1.73 m <sup>2</sup> | Proteinuria by dipsticks and eGFR by 186 MDRD | Kinetic Jaffe | 68.4% among anemic patients , 57.6% non anemic | <b>Total prevalence: 18.5%</b>                                                    | Low    |
| Fiseha T <sup>152</sup>    | 2014, Ethiopia, East                      | Follow-up clinic at Butajira hospital                                    | 214  | Diabetic patients                             | Age (years): 45 ± 14.5<br>Male gender: 57.5%<br>SBP(mmHg): 121 ± 17<br>DBP(mmHg): 79 ± 10<br>BMI(kg/m <sup>2</sup> ): 25.26 ± 4.35                                                                | eGFR of <60 ml/min/1.73 m <sup>2</sup> | eGFR by CG and 186 MDRD                       | Kinetic Jaffe | Not measured                                   | <b>Total prevalence (MDRD): 18.2%</b><br>Prevalence (CG):23.8%                    | Medium |
| Pillay S <sup>96</sup>     | 2016, South Africa,                       | All patients seen at Edendale                                            | 653  | Diabetic patients with or                     | Among diabetic patients with HIV:<br>Age( years): 50-70                                                                                                                                           | eGFR of <60 ml/min/1.73 m <sup>2</sup> | Proteinuria by dipstick and eGFR by 186       | Kinetic Jaffe | 18%                                            | <b>Total prevalence : 18.8%</b>                                                   | Medium |

|                        |                   |                                                                                            |     |                                                  |                                                                                                       |                                                               |                                                       |               |       |                                                             |     |
|------------------------|-------------------|--------------------------------------------------------------------------------------------|-----|--------------------------------------------------|-------------------------------------------------------------------------------------------------------|---------------------------------------------------------------|-------------------------------------------------------|---------------|-------|-------------------------------------------------------------|-----|
|                        | South             | Hospital diabetic clinic                                                                   |     | without HIV (149 DM and HIV; 504 DM without HIV) | Male gender: 32%<br>Among diabetic patients without HIV<br>Age ( years): 51-60                        |                                                               | MDRD                                                  |               |       |                                                             |     |
| Eghan B <sup>138</sup> | 2007, Ghana, West | Outpatient diabetic clinic of the department of medicine at Komfo Anokye Teaching Hospital | 109 | Diabetic patients                                | Age (years): 54.1±10.9<br>Male gender: 28%<br>Hypertension: 39%<br>BMI(kg/m <sup>2</sup> ): 26.3± 4.4 | microalbuminuria if urine albumin excretion was 30–300 mg/day | Albuminuria by urine albumin excretion and eGFR by CG | Not mentioned | 43.1% | <b>Total prevalence( based on microalbuminuria ): 43.1%</b> | Low |

DM: diabetes mellitus, BMI: body mass index, SBP: systolic blood pressure, DBP: diastolic blood pressure, IDMS: Isotope dilution mass spectrometry, MDRD: Modification of Diet in Renal Disease, CG: Cockcroft Gault, CKD-EPI: Chronic Kidney Disease Epidemiology Collaboration, IQR: inter-quartile range, KDOQI: Kidney Disease Outcome Quality Initiative

Table 5: Studies on CKD among hypertensive patients

| Study ID                 | Year<br>Country<br>Region    | Location                             | N   | Study group                                   | Population characteristics                                                                                                                                                                                                                                                    | Definition of CKD                                                    | Method of outcome assessment                                 | Creatinine assay | Proteinuria  | CKD prevalence                                                                                         | Quality assessment |
|--------------------------|------------------------------|--------------------------------------|-----|-----------------------------------------------|-------------------------------------------------------------------------------------------------------------------------------------------------------------------------------------------------------------------------------------------------------------------------------|----------------------------------------------------------------------|--------------------------------------------------------------|------------------|--------------|--------------------------------------------------------------------------------------------------------|--------------------|
| Osafo C <sup>126</sup>   | 2011<br>Ghana,<br>West       | four polyclinics                     | 712 | Hypertensive patients                         | Age (years): 59 (range,19–90)<br>Male gender: 21.3%<br>DM: 14.7%<br>SBP (mmHg): 150 (range,100–280)<br>DBP (mmHg): 90 (range, 60–160)<br>BMI (kg/m <sup>2</sup> ): 29.7 (range,12.2–67.4)<br>BMI categories (kg/m <sup>2</sup> ):<br><25: 22.3%<br>25-29.9: 26%<br>>30: 45.7% | KDOQI                                                                | Proteinuria by PCR (men>0.3 women>0.2 mg/mg)<br>eGFR by MDRD | Kinetic Jaffe    | 28.90%       | <b>Total prevalence: 46.90%</b><br><b>Prevalence by stage:</b><br>Stage 1-2: 19.1%<br>Stage 3-5: 27.8% | Low                |
| Ajayi S <sup>164</sup>   | 2014<br>Nigeria,<br>West     | Tertiary health centre               | 628 | Records of hypertensive and diabetic patients | Age (years): 49.71±13.22<br>Male gender : 49%<br>DM: 8.6%<br>SBP (mmHg): 135.9 ± 27.4<br>DBP (mmHg): 87.0 ± 16.3<br>BMI ( kg/m <sup>2</sup> ): 27.8 ± 8.7                                                                                                                     | eGFR <60 mL/min/1.73 m <sup>2</sup>                                  | eGFR by MDRD                                                 | Not mentioned    | Not measured | <b>Total prevalence: 38.5%</b>                                                                         | Low                |
| Lengani A <sup>127</sup> | 2000<br>Burkina Faso<br>West | department of Cardiology or Internal | 342 | Hypertensive patients                         | Age (years): 50.6 ±13.8<br>Male gender: 58%                                                                                                                                                                                                                                   | Serum creatinine ≥ 650 µmol/l and or blood urea ≥35 mmol/l plus long | Measurement of scr, 24-hour proteinuria                      | Not mentioned    |              | <b>Total prevalence: 50.8%</b>                                                                         | Low                |

|                              |                               |                                              |      |                                        |                                                                                                                                                   |                                                                                                                                  |                                                    |                      |                                                 |                                                                                |        |
|------------------------------|-------------------------------|----------------------------------------------|------|----------------------------------------|---------------------------------------------------------------------------------------------------------------------------------------------------|----------------------------------------------------------------------------------------------------------------------------------|----------------------------------------------------|----------------------|-------------------------------------------------|--------------------------------------------------------------------------------|--------|
|                              |                               | medicine                                     |      |                                        |                                                                                                                                                   | history with clinical manifestations                                                                                             |                                                    |                      |                                                 |                                                                                |        |
| Nwankwo E <sup>165</sup>     | 2006<br>Nigeria<br>West       | University of Maiduguri Teaching Hospital    | 185  | All hospitalized hypertensive patients | Age (years): 44.6 ± 14.9<br>Male gender: 49%                                                                                                      | Scr >135 µmol/l                                                                                                                  | Measurement of Scr                                 | Not mentioned        | Not measured                                    | <b>Total prevalence: 45.50%</b>                                                | Low    |
| Rayner B <sup>128</sup>      | 2006<br>South Africa<br>South | 100 General practice centres                 | 1091 | Random hypertensive patients           | Age (years): ≥35 years<br>Male gender: 48.5%<br>BMI: 23.6% of the patients had a normal BMI<br>41.9% were overweight and 34.2% were frankly obese | Albuminuria defined as (mg/mmol)<br>microalbuminuria 3-30<br>macroalbuminuria >30                                                | Quantitative assessment of albuminuria by ACR      | not measured         | 21.3% microalbuminuria<br>4.1% macroalbuminuria | <b>Total prevalence (based on albuminuria): 25.4%</b>                          | Medium |
| Plange-Rhule J <sup>89</sup> | 1999<br>Ghana,<br>West        | Komfo Anokye Teaching Hospital               | 448  | Hypertensive patients                  | Age (years): 50.5 ±13.0<br>Male gender: 36%<br>SBP (mmHg): 165.0 ±27.8<br>DBP (mmHg): 101.9 ±17.9                                                 | Plasma creatinine ≥140µmol/l                                                                                                     | Proteinuria by urinary strips and serum creatinine | Not mentioned        | 25.50%                                          | <b>Total prevalence: 30.2%</b>                                                 | Low    |
| Addo J <sup>141</sup>        | 2009<br>Ghana , West          | seven central government ministries in Accra | 219  | Hypertensive patients                  | Age (years): 50.4± 6.6<br>Male gender: 64%<br>SBP (mmHg):156.0 ±21.5<br>DBP (mmHg): 95 ±13<br>BMI (kg/m <sup>2</sup> ): 27.5 ± 5.4                | Persistent proteinuria on Urinalysis in the absence of urinary tract infection and/or impaired GFR<60 ml/min/1.73 m <sup>2</sup> | Proteinuria and eGFR by MDRD                       | Enzymatic assessment | 13.4%                                           | <b>Total prevalence: 13.4%</b><br>4.1% had eGFR< 60 ml/min/1.73 m <sup>2</sup> | Medium |

1  
2  
3  
4  
5  
6  
7  
8  
9  
10  
11  
12  
13  
14  
15  
16  
17  
18  
19  
20  
21  
22  
23  
24  
25  
26  
27  
28  
29  
30  
31  
32  
33  
34  
35  
36  
37  
38  
39  
40  
41  
42  
43  
44  
45  
46  
47  
48  
49

|                           |                   |                                                              |     |                                                                    |                                                                                                                                                                                                                                                                                                                                                                                                                                                                                                                                                                                         |                                                                            |                                                                 |               |       |                                                                                                                                                   |     |
|---------------------------|-------------------|--------------------------------------------------------------|-----|--------------------------------------------------------------------|-----------------------------------------------------------------------------------------------------------------------------------------------------------------------------------------------------------------------------------------------------------------------------------------------------------------------------------------------------------------------------------------------------------------------------------------------------------------------------------------------------------------------------------------------------------------------------------------|----------------------------------------------------------------------------|-----------------------------------------------------------------|---------------|-------|---------------------------------------------------------------------------------------------------------------------------------------------------|-----|
| Aryee C <sup>139</sup>    | 2016, Ghana, West | Komfo Anokye Teaching Hospital and the surrounding community | 242 | 180 non-diabetic hypertensive patients and 61 age matched controls | <p>Age (years): 22-87<br/>                     Male gender:37%<br/>                     SBP (mmHg): hypertensive patients( on antihypertensive therapy:155.46±1.82, no antihypertensive therapy:152±3.27), control (117.38±0.96)<br/>                     DBP (mmHg): hypertensive patients( on antihypertensive therapy:101.46±0.94, no antihypertensive therapy: 100.50±1.34), control (73.28±0.77)<br/>                     BMI (kg/m<sup>2</sup>): hypertensive patients( on antihypertensive therapy:29.52±0.39, no antihypertensive therapy: 29.8±0.71), control (29.36±0.65)</p> | eGFR <60 ml/min/1.73m <sup>2</sup>                                         | Urine albumin excretion, and eGFR by CG , 186 MDRD, and CKD-EPI | Not mentioned | 30%   | <p><b>Total prevalence (CKD-EPI): 14.5%</b><br/>                     Prevalence by MDRD:13.3%<br/>                     Prevalence by CG:16.6%</p> | Low |
| Nabbaale J <sup>140</sup> | 2015 Uganda East  | out- patient hypertension clinic                             | 256 | Newly diagnosed eligible black adult hypertensive patients         | <p>Age (years): 54.3 ± 6.2<br/>                     Male gender: 36.7%</p>                                                                                                                                                                                                                                                                                                                                                                                                                                                                                                              | Microalbuminuria as a random urine albumin level between 30 and 299 mg/dl. | Quantitative assessment of albumin in urine                     | Not measured  | 39.5% | <p><b>Total prevalence (based on microalbuminuria): 39.5%</b></p>                                                                                 | Low |

DM: diabetes mellitus, BMI: body mass index, SBP: systolic blood pressure, DBP: diastolic blood pressure, IDMS: Isotope dilution mass spectrometry, MDRD: Modification of Diet in Renal Disease, CG: Cockcroft Gault , CKD-EPI: Chronic Kidney Disease Epidemiology Collaboration, IQR: inter-quartile range , KDOQI: Kidney Disease Outcome Quality Initiative



Table 6: Studies on CKD among other populations

| Study ID                     | Year<br>Country<br>Region | Location                                                                    | N   | Study group                                          | Population Characteristics                                                                                           | Definition of CKD                                                                                | Method of outcome assessment            | Creatinine assay | Proteinuria | CKD prevalence                                                                                                            | Quality assessment |
|------------------------------|---------------------------|-----------------------------------------------------------------------------|-----|------------------------------------------------------|----------------------------------------------------------------------------------------------------------------------|--------------------------------------------------------------------------------------------------|-----------------------------------------|------------------|-------------|---------------------------------------------------------------------------------------------------------------------------|--------------------|
| E.F K <sup>19</sup>          | 2013<br>Senegal<br>West   | Nephrology department of the Aristide Le Dantec University Hospital Center. | 43  | Lupus patients                                       | Age (years): 32.9<br>Male gender: 7%<br>Hypertension: 30%                                                            | Proteinuria > 0.5 g/24 hours with or without hematuria/renal insufficiency/abnormal renal biopsy | 24-hour proteinuria and eGFR by CG      | Not mentioned    | 51%         | <b>Total prevalence: 72%</b>                                                                                              | Low                |
| Abd ElHafeez S <sup>29</sup> | 2009<br>Egypt<br>North    | The Nephrology department at the Main Alexandria University hospital        | 400 | Relatives of ESRD patients                           | Age (years): 35.2±11.6<br>Male gender: 50.8%<br>Hypertension: 60%<br>DM: 11.5%<br>BMI(kg/m <sup>2</sup> ): 28.5±5.89 | KDOQI                                                                                            | Proteinuria by urinary strips, 186 MDRD | Kinetic Jaffe    | 21.3%       | <b>Total prevalence 57%</b><br><b>Prevalence by stage:</b><br>Stage 1: 9%<br>Stage 2: 44%<br>Stage 3: 4%<br>Stage 4: 0.3% | medium             |
| Raji Y <sup>28</sup>         | 2015,<br>Nigeria,         | Nephrology out-patient                                                      | 469 | (230 first degree relatives of patients with CKD and | Age (years): 33.49 ± 12.0<br>BMI(kg/m <sup>2</sup> ): first degree relatives: 25.5 ± 5.3, controls: 23.8 ± 4.0       | Reduced eGFR                                                                                     | Albuminuria by ACR and eGFR by MDRD     | Not mentioned    | 46%         | <b>Total prevalence:</b>                                                                                                  | Low                |

|                          |                         |                                              |     |                                                                                 |                                                                                                                                                                                                  |                                                                                                                                                                                |                                                             |                   |        |                                                                                            |        |
|--------------------------|-------------------------|----------------------------------------------|-----|---------------------------------------------------------------------------------|--------------------------------------------------------------------------------------------------------------------------------------------------------------------------------------------------|--------------------------------------------------------------------------------------------------------------------------------------------------------------------------------|-------------------------------------------------------------|-------------------|--------|--------------------------------------------------------------------------------------------|--------|
|                          | West                    | clinic at Lagos University Teaching Hospital |     | 230 age- and gender-matched controls with no personal or family history of CKD) | SBP(mmHg): first degree relatives: 116.5 ± 22.5, controls: 112.1 ± 18.1<br>DBP(mmHg): first degree relatives: 74.9 ± 12.7, controls: 71.4 ± 10.5                                                 |                                                                                                                                                                                |                                                             |                   |        | 4%                                                                                         |        |
| ElSharif M <sup>24</sup> | 2013<br>Sudan<br>East   | Primary health care                          | 252 | Patients attending the primary health care facilities                           | Age (years): 43.35± 12.80<br>Male gender: 16%<br>Hypertension: 10%<br>DM: 5.95%<br>BMI (kg/m <sup>2</sup> ): 28.67 ± 6.43<br>BMI categories (kg/m <sup>2</sup> ):<br><18: 2.38%<br>>25.13: 71.83 | eGFR of < 60 mL/min/1.73 m <sup>2</sup> with or without proteinuria.                                                                                                           | Proteinuria by urinary strip and eGFR by MDRD               | Not mentioned     | 24.21% | <b>Total prevalence: 10.32%</b>                                                            | Low    |
| Mo A <sup>26</sup>       | 2009<br>Nigeria<br>West | Family practice clinic                       | 250 | Newly registered patients who attended the Family Practice Clinic               | Age (years): 50.52 + 13.03<br>Male gender: 27.2%<br>32% elevated SBP, 30% elevated DBP<br>DM: 6%<br>Obesity: 32%                                                                                 | Persistently abnormal ACR irrespective of GFR level or persistent eGFR < 60 mL/min/1.73 m <sup>2</sup> irrespective of the presence or absence of Kidney damage after 3 months | Proteinuria by urinary strip, eGFR by MDRD                  | Standardized IDMS | 14.4%  | <b>Total prevalence: 14.4%</b><br>10.4% had persistent eGFR< 60 ml/min/1.73 m <sup>2</sup> | Medium |
| Sumaili EK <sup>25</sup> | 2009<br>Congo           | Primary and secondary                        | 527 | At risk population randomly selected                                            | Age (years): 53.9 ± 15.5<br>Male gender: 43%<br>Hypertension: 58.2%<br>DM: 54.5%<br>Obesity: 16%                                                                                                 | KDOQI                                                                                                                                                                          | Proteinuria by urinary strip, 24-hour proteinuria, 175 MDRD | Kinetic Jaffe     | 19%    | <b>Total prevalence: 36%</b><br><b>Prevalence by stage</b>                                 | High   |

1  
2  
3  
4  
5  
6  
7  
8  
9  
10  
11  
12  
13  
14  
15  
16  
17  
18  
19  
20  
21  
22  
23  
24  
25  
26  
27  
28  
29  
30  
31  
32  
33  
34  
35  
36  
37  
38  
39  
40  
41  
42  
43  
44  
45  
46  
47  
48  
49

|                          |                           |                                                     |      |                                                               |                                                                                                                                                    |                                                                                                          |                                                |                                   |                       |                                                                            |     |
|--------------------------|---------------------------|-----------------------------------------------------|------|---------------------------------------------------------------|----------------------------------------------------------------------------------------------------------------------------------------------------|----------------------------------------------------------------------------------------------------------|------------------------------------------------|-----------------------------------|-----------------------|----------------------------------------------------------------------------|-----|
|                          | Central                   | health care                                         |      |                                                               |                                                                                                                                                    |                                                                                                          |                                                |                                   |                       | stage 1: 4.2%, stage 2: 6.1%, stage 3: 18.3%, stage 4: 1.9%, stage 5: 5.7% |     |
| Anyabolu E <sup>30</sup> | 2016, Nigeria, West       | Federal Medical Center                              | 136  | Subjects from medical out-patient department of the hospital. | Age (years): 38.58±11.79<br>Male gender: 27.9%<br>BMI(kg/m <sup>2</sup> ): 25.51±6.47                                                              | Proteinuria as 24 hours protein ≥ 0.300g and impaired renal filtration function as CrCl <90mls/min       | Proteinuria by quantitative assessment and Scr | Kinetic Jaffe                     | 14.1% had proteinuria | <b>Total prevalence: 14.1%</b>                                             | Low |
| Dessein P <sup>20</sup>  | 2015, South Africa, South | Charlotte Maxeke Johannesburg and Milpark Hospitals | 233  | African patients with rheumatoid arthritis                    | Age (years): 57.1±10.8<br>Male gender: 17.2%<br>BMI(kg/m <sup>2</sup> ): 27.4±6.0<br>Hypertension: 57.5%<br>Diabetes mellitus: 12.5%               | eGFR< 60ml/min/1.73m <sup>2</sup>                                                                        | eGFR by CG, MDRD, CKD-EPI                      | Kinetic Jaffe and IDMS calibrated | Not measured          | <b>Total prevalence: 39%</b>                                               | Low |
| Ephraim R <sup>21</sup>  | 2015, Ghana, West         | Tema General Hospital                               | 194  | Patients with sickle cell anemia                              | Age (years): 23.25 ± 12.04<br>Male gender: 43.3%<br>SBP(mmHg): 110.06 ± 8.27<br>DBP(mmHg): 67.16 ± 8.23<br>BMI (kg/m <sup>2</sup> ): 18.85 ± 11.19 | (eGFR < 60 mL/min/ 1.73 m <sup>2</sup> or evidence of kidney damage as albuminuria, or overt proteinuria | Proteinuria by dipstick and eGFR by CKD-EPI    | IDMS                              | 13.4%                 | <b>39.2%</b>                                                               | Low |
| van                      | 2010                      | Tertiary                                            | 1216 | New patients referred to                                      | Age (years): 39.6 ± 15.9                                                                                                                           | Elevated SCr(>130                                                                                        | Proteinuria by quantitative                    | Not                               | 16.7%                 | <b>Total</b>                                                               | Low |

|                                                          |                           |                    |                                                                                    |    |                                                                                                                                               |                                                                     |                                                                            |                                                                          |               |                                                     |                                                                  |     |
|----------------------------------------------------------|---------------------------|--------------------|------------------------------------------------------------------------------------|----|-----------------------------------------------------------------------------------------------------------------------------------------------|---------------------------------------------------------------------|----------------------------------------------------------------------------|--------------------------------------------------------------------------|---------------|-----------------------------------------------------|------------------------------------------------------------------|-----|
| 1<br>2<br>3<br>4<br>5<br>6<br>7<br>8<br>9                | Rensburg B <sup>27</sup>  | South Africa South | hospital                                                                           |    | the Renal Unit                                                                                                                                | Male gender: 51.1%<br>Hypertension: 13.2%<br>DM: 10.8%              | µmol/L) and small kidneys on imaging without evidence of reversible causes | assessment and Scr measurement                                           | mentioned     | proteinuria >3.5 g/dl                               | <b>prevalence: 37.9%</b>                                         |     |
| 10<br>11<br>12<br>13<br>14<br>15<br>16<br>17             | Hamdouk M <sup>104</sup>  | 2011 Sudan East    | hairdressing saloons                                                               | 72 | Hairdressers                                                                                                                                  | Age (years): 40±8<br>Male gender: 0%<br>Hypertension: 19.4%         | Scr level ≥2 mg/dl                                                         | Proteinuria by urinary strip and 24 hrs Scr measurement and renal biopsy | Not mentioned | 26.4% had albuminuria                               | <b>Total prevalence: 26.4%</b><br>14% had Scr ≥2 mg/dl           | Low |
| 18<br>19<br>20<br>21<br>22<br>23<br>24<br>25<br>26<br>27 | EL-Safty I <sup>129</sup> | 2003 Egypt North   | male workers attending the out-patient clinic of the Health Insurance Organization | 81 | Male workers attending the out-patient clinic of the Health Insurance Organization Workers (29 non-silicotics, 24 silicotics and 28 referent) | Age (years): 39.83±7.27<br>Male gender: 100%<br>Hypertension: 19.4% | Elevated proteinuria                                                       | Assessment of proteinuria quantitatively                                 | Not measured  | 93% among non-silica exposed<br>100% silica exposed | <b>Total prevalence (among those with Silica exposure): 100%</b> | Low |

DM: diabetes mellitus, BMI: body mass index, SBP: systolic blood pressure, DBP: diastolic blood pressure, IDMS: Isotope dilution mass spectrometry, MDRD: Modification of Diet in Renal Disease, CG: Cockcroft Gault,

CKD-EPI: Chronic Kidney Disease Epidemiology Collaboration, IQR: inter-quartile range, KDOQI: Kidney Disease Outcome Quality Initiative

1  
2  
3  
4  
5  
6  
7  
8  
9  
10  
11  
12  
13  
14  
15  
16  
17  
18  
19  
20  
21  
22  
23  
24  
25  
26  
27  
28  
29  
30  
31  
32  
33  
34  
35  
36  
37  
38  
39  
40  
41  
42  
43  
44  
45  
46  
47  
48  
49

## Titles and legends

**Fig. 1** Flow diagram of the study selection

**Fig. 2** Prevalence of CKD among entire general population. Estimates from this figure should be presented with caution as it is bound to be imprecise and inaccurate due to its tentative way of estimation

**Fig. 3** Main causes of CKD

## Supporting information

**S1 Table:** Search strategy adopted in PubMed and Ovid MEDLINE

**S2 Table:** Studies among CKD patients

## REFERENCES

1. Levey AS, Atkins R, Coresh J, et al. Chronic kidney disease as a global public health problem: approaches and initiatives - a position statement from Kidney Disease Improving Global Outcomes. *Kidney international* 2007;72(3):247-59. doi: 10.1038/sj.ki.5002343
2. Zoccali C, Kramer A, Jager KJ. Epidemiology of CKD in Europe: an uncertain scenario. *Nephrology dialysis transplantation* 2010;25(6):1731-33.
3. Global, regional, and national age–sex specific all-cause and cause-specific mortality for 240 causes of death, 1990–2013: a systematic analysis for the Global Burden of Disease Study 2013. *The Lancet* 2015;385(9963):117-71. doi: 10.1016/s0140-6736(14)61682-2
4. Bello AK, Peters J, Rigby J, et al. Socioeconomic status and chronic kidney disease at presentation to a renal service in the United Kingdom. *Clinical journal of the American Society of Nephrology : CJASN* 2008;3(5):1316-23. doi: 10.2215/cjn.00680208 [published Online First: 2008/06/27]
5. El Nahas AM, Bello AK. Chronic kidney disease: the global challenge. *The Lancet* 2005;365(9456):331-40.
6. UN. World Population Prospects: The 2015 Revision, Key Findings and Advance Tables: United Nations 2015 [Available from: [http://esa.un.org/unpd/wpp/publications/files/key\\_findings\\_wpp\\_2015.pdf](http://esa.un.org/unpd/wpp/publications/files/key_findings_wpp_2015.pdf) accessed November 8, 2015
7. Aikins Ad-G, Unwin N, Agyemang C, et al. Commentary Tackling Africa's chronic disease burden: from the local to the global. 2010
8. Organization WH. Global action plan for the prevention and control of noncommunicable diseases 2013-2020. 2013
9. Stanifer JW, Jing B, Tolan S, et al. The epidemiology of chronic kidney disease in sub-Saharan Africa: a systematic review and meta-analysis. *The Lancet Global Health* 2014;2(3):e174-81. doi: [http://dx.doi.org/10.1016/S2214-109X\(14\)70002-6](http://dx.doi.org/10.1016/S2214-109X(14)70002-6)
10. Anothaisintawee T, Rattanasiri S, Ingsathit A, et al. Prevalence of chronic kidney disease: a systematic review and meta-analysis. *Clinical nephrology* 2009;71(3):244-54.
11. Liberati A, Altman DG, Tetzlaff J, et al. The PRISMA statement for reporting systematic reviews and meta-analysis of studies that evaluate health care interventions: explanation and elaboration. *Italian Journal of Public Health* 2012;6(4)
12. Matsha TE, Yako YY, Rensburg MA, et al. Chronic kidney diseases in mixed ancestry south African populations: prevalence, determinants and concordance between kidney function estimators. *BMC nephrology* 2013;14:75. doi: <http://dx.doi.org/10.1186/1471-2369-14-75>
13. Eastwood JB, Kerry SM, Plange-Rhule J, et al. Assessment of GFR by four methods in adults in Ashanti, Ghana: the need for an eGFR equation for lean African populations.[Erratum appears in *Nephrol Dial Transplant*. 2011 Dec;26(12):4153 Note: Emmett, Lynsey [added]; Miller, Michelle A [added]]. *Nephrology Dialysis Transplantation* 2010;25(7):2178-87. doi: <http://dx.doi.org/10.1093/ndt/gfp765>
14. Glaser N, Deckert A, Phiri S, et al. Comparison of Various Equations for Estimating GFR in Malawi: How to Determine Renal Function in Resource Limited Settings? *PloS one* 2015;10(6):e0130453. doi: 10.1371/journal.pone.0130453 [published Online First: 2015/06/18]
15. Juni P, Altman DG, Egger M. Systematic reviews in health care: Assessing the quality of controlled clinical trials. *BMJ (Clinical research ed)* 2001;323(7303):42-6. [published Online First: 2001/07/07]
16. Whiting P, Rutjes AW, Reitsma JB, et al. The development of QUADAS: a tool for the quality assessment of studies of diagnostic accuracy included in systematic reviews. *BMC medical research methodology* 2003;3:25. doi: 10.1186/1471-2288-3-25 [published Online First: 2003/11/11]
17. Shamliyan T, Kane RL, Dickinson S. A systematic review of tools used to assess the quality of observational studies that examine incidence or prevalence and risk factors for diseases. *J Clin Epidemiol* 2010;63(10):1061-70. doi: 10.1016/j.jclinepi.2010.04.014 [published Online First: 2010/08/24]
18. Cohen J. A Coefficient of Agreement for Nominal Scales. *Educational and Psychological Measurement* 1960;20(1):37-46. doi: 10.1177/001316446002000104
19. Ka EF, Cisse MM, Lemrabott AT, et al. [Lupus nephropathy in black patients with systemic lupus erythematosus in Senegal: 43 cases]. *Medecine et sante tropicales* 2013;23(3):328-31. doi: 10.1684/mst.2013.0200 [published Online First: 2013/10/29]
20. Dessein PH, Hsu HC, Tsang L, et al. Kidney function, endothelial activation and atherosclerosis in black and white Africans with rheumatoid arthritis. *PloS one* 2015;10(3):e0121693. doi: 10.1371/journal.pone.0121693 [published Online First: 2015/03/26]
21. Ephraim RK, Osakunor DN, Cudjoe O, et al. Chronic kidney disease is common in sickle cell disease: a cross-sectional study in the Tema Metropolis, Ghana. *BMC nephrology* 2015;16:75. doi: 10.1186/s12882-015-0072-y [published Online First: 2015/05/30]

22. Ghahramani N. Silica nephropathy. *The international journal of occupational and environmental medicine* 2010;1(3 July)
23. Sampathkumar K, Yesudas S. Hair dye poisoning and the developing world. *Journal of emergencies, trauma and shock* 2009;2(2):129.
24. Elsharif ME, Abdullha SM, Abdalla SM, et al. The magnitude of chronic kidney diseases among primary health care attendees in Gezira state, Sudan. *Saudi journal of kidney diseases and transplantation : an official publication of the Saudi Center for Organ Transplantation, Saudi Arabia* 2013;24(4):807-9. [published Online First: 2013/07/03]
25. Sumaili EK, Cohen EP, Zinga CV, et al. High prevalence of undiagnosed chronic kidney disease among at-risk population in Kinshasa, the Democratic Republic of Congo. *BMC nephrology* 2009;10:18. doi: 10.1186/1471-2369-10-18 [published Online First: 2009/07/23]
26. Afolabi MO, Abioye-Kuteyi E, Arogundade FA, et al. Prevalence of chronic kidney disease in a Nigerian family practice population. *South African Family Practice* 2009;51(2):132-37.
27. van Rensburg BW, van Staden AM, Rossouw GJ, et al. The profile of adult nephrology patients admitted to the Renal Unit of the Universitas Tertiary Hospital in Bloemfontein, South Africa from 1997 to 2006. *Nephrology Dialysis Transplantation* 2010;25(3):820-4. doi: <http://dx.doi.org/10.1093/ndt/gfp535>
28. Raji Y, Mabayoje O, Bello T. Familial clustering of risk factors for cardiovascular disease among first-degree relatives of patients with chronic kidney disease in a sub-Saharan African population. *Cardiovascular journal of Africa* 2015;26(2 Suppl 1):S11-4. doi: 10.5830/cvja-2015-041 [published Online First: 2015/05/13]
29. The unrecognized prevalence of chronic kidney disease among family members of end stage renal disease patients [IEA-EEF abstract 264]; 2009. *European Journal of Epidemiology*.
30. Anyabolu EN, Chukwuonye, II, Anyabolu AE, et al. A look at risk factors of proteinuria in subjects without impaired renal filtration function in a general population in Owerri, Nigeria. *The Pan African medical journal* 2016;23:257. doi: 10.11604/pamj.2016.23.257.8189 [published Online First: 2016/08/16]
31. El Khayat SS, Hallal K, Gharbi MB, et al. Fate of patients during the first year of dialysis. *Saudi journal of kidney diseases and transplantation : an official publication of the Saudi Center for Organ Transplantation, Saudi Arabia* 2013;24(3):605-9. [published Online First: 2013/05/04]
32. Seck SM, Diallo IM, Diagne SI. Epidemiological patterns of chronic kidney disease in black African elders: a retrospective study in West Africa. *Saudi Journal of Kidney Diseases & Transplantation* 2013;24(5):1068-72.
33. Seck SM, Elhadj FK, Fall S, et al. [Adherence to therapy in sub-Saharan non-dialysed patients with chronic kidney diseases]. *Nephrologie et Therapeutique* 2008;4(5):325-9. doi: <http://dx.doi.org/10.1016/j.nephro.2008.02.004>
34. Bourquia A. [Autosomal dominant polycystic kidney disease (ADPKD) in Morocco. Multicenter study about 308 families]. *Nephrologie* 2002;23(2):93-6. [published Online First: 2002/05/16]
35. Ouattara B, Kra O, Yao H, et al. [Characteristics of chronic renal failure in black adult patients hospitalized in the Internal Medicine department of Treichville University Hospital]. *Nephrologie et Therapeutique* 2011;7(7):531-4. doi: <http://dx.doi.org/10.1016/j.nephro.2011.03.009>
36. Lengani A, Coulibaly G, Laville M, et al. [Epidemiology of severe chronic renal insufficiency in Burkina Faso]. *Sante (Montrouge, France)* 1997;7(6):379-83. [published Online First: 1998/03/21]
37. Afifi AM, Mady GE, Ahmad AA, et al. Pattern of renal diseases among elderly Egyptians patients with acute or chronic renal diseases in Ain Shams University and Nasser Institute Hospitals, Cairo, Egypt. *Journal of the Egyptian Society of Parasitology* 2005;35(3):911-24. [published Online First: 2005/12/13]
38. Diouf B, Ka EF, Niang A, et al. [Etiologies of chronic renal insufficiency in a adult internal medicine service in Dakar]. *Dakar medical* 2000;45(1):62-5. [published Online First: 2003/12/12]
39. Niang A, Dial C, Ka EF, et al. [Nephrotic syndrom with focal and segmental glomerulosclerosis in Dakar: epidemiological and clinicopathological characteristics (about 134 cases)]. *Dakar medical* 2008;53(1):45-51. [published Online First: 2008/12/24]
40. Sabi KA, Gnionsahe DA, Amedegnato D. [Chronic kidney failure in Togo: clinical, laboratory, and etiological aspects]. *Medecine tropicale : revue du Corps de sante colonial* 2011;71(1):74-6. [published Online First: 2011/05/19]
41. Ulasi II, Ijoma CK. The enormity of chronic kidney disease in Nigeria: the situation in a teaching hospital in South-East Nigeria. *Journal of tropical medicine* 2010;2010
42. Abderrahim E, Zouaghi K, Hedri H, et al. Renal replacement therapy for diabetic end-stage renal disease. Experience of a Tunisian hospital centre. *Diabetes & metabolism* 2001;27(5 Pt 1):584-90.
43. Abdou N, Boucar D, El Hadj Fary KA, et al. Histopathological profiles of nephropathies in senegal. *Saudi journal of kidney diseases and transplantation : an official publication of the Saudi Center for Organ Transplantation, Saudi Arabia* 2003;14(2):212-4. [published Online First: 2008/01/23]
44. Afifi A, El Setouhy M, El Sharkawy M, et al. Diabetic nephropathy as a cause of end-stage renal disease in Egypt: a six-year study. *Eastern Mediterranean health journal = La revue de sante de la Mediterranee orientale = al-Majallah al-sihhiyah li-sharq al-mutawassit* 2004;10(4-5):620-6. [published Online First: 2005/12/13]
45. Afifi A, Karim MA. Renal replacement therapy in Egypt: first annual report of the Egyptian Society of Nephrology, 1996. *Eastern Mediterranean health journal = La revue de sante de la Mediterranee orientale = al-Majallah al-sihhiyah li-sharq al-mutawassit* 1999;5(5):1023-9. [published Online First: 2000/09/13]

- 1  
2  
3  
4  
5  
6  
7  
8  
9  
10  
11  
12  
13  
14  
15  
16  
17  
18  
19  
20  
21  
22  
23  
24  
25  
26  
27  
28  
29  
30  
31  
32  
33  
34  
35  
36  
37  
38  
39  
40  
41  
42  
43  
44  
45  
46  
47  
48  
49  
50  
51  
52  
53  
54  
55  
56  
57  
58  
59  
60
46. Agaba EI, Wigwe CM, Agaba PA, et al. Performance of the Cockcroft-Gault and MDRD equations in adult Nigerians with chronic kidney disease. *International urology and nephrology* 2009;41(3):635-42. doi: 10.1007/s11255-008-9515-8 [published Online First: 2009/01/13]
  47. Alashek WA, McIntyre CW, Taal MW. Epidemiology and aetiology of dialysis-treated end-stage kidney disease in Libya. *BMC nephrology* 2012;13:33. doi: 10.1186/1471-2369-13-33 [published Online First: 2012/06/12]
  48. Alasia DD, Emem-Chioma P, Wokoma FS. A single-center 7-year experience with end-stage renal disease care in Nigeria—a surrogate for the poor state of ESRD care in Nigeria and other sub-saharan african countries: advocacy for a global fund for ESRD care program in sub-saharan african countries. *Int J Nephrol* 2012;2012:639653. doi: <http://dx.doi.org/10.1155/2012/639653>
  49. Alebiosu CO, Ayodele OO, Abbas A, et al. Chronic renal failure at the Olabisi Onabanjo University Teaching Hospital, Sagamu, Nigeria. *African health sciences* 2006;6(3):132-8. doi: 10.5555/afhs.2006.6.3.132 [published Online First: 2006/12/05]
  50. Amira CO, Braimoh RW, Bello BT. Pattern of intradialytic complications at the Lagos University Teaching Hospital. *African journal of medicine and medical sciences* 2012;41(4):411-6. [published Online First: 2013/05/16]
  51. Arogundade FA, Sanusi AA, Hassan MO, et al. The pattern, clinical characteristics and outcome of ESRD in Ile-Ife, Nigeria: is there a change in trend? *African health sciences* 2011;11(4):594-601. [published Online First: 2012/06/01]
  52. Counil E, Cherni N, Kharrat M, et al. Trends of incident dialysis patients in Tunisia between 1992 and 2001. *American journal of kidney diseases : the official journal of the National Kidney Foundation* 2008;51(3):463-70. doi: 10.1053/j.ajkd.2007.10.032 [published Online First: 2008/02/26]
  53. Chijioke A, Makusidi AM, Kolo PM. Electrocardiographic abnormalities among dialysis naive chronic kidney disease patients in Ilorin Nigeria. *Annals of African medicine* 2012;11(1):21-6. doi: 10.4103/1596-3519.91011 [published Online First: 2011/12/27]
  54. Madala ND, Thusi GP, Assounga AG, et al. Characteristics of South African patients presenting with kidney disease in rural KwaZulu-Natal: a cross sectional study. *BMC nephrology* 2014;15:61. doi: <http://dx.doi.org/10.1186/1471-2369-15-61>
  55. Okpechi IG, Ayodele OE, Rayner BL, et al. Kidney disease in elderly South Africans. *Clinical nephrology* 2013;79(4):269-76. doi: <http://dx.doi.org/10.5414/CN107746>
  56. Laleye A, Awede B, Agboton B, et al. Autosomal dominant polycystic kidney disease in University Clinic of Nephrology and Haemodialysis of Cotonou: clinical and genetical findings. *Genetic Counseling* 2012;23(4):435-45.
  57. Okunola Y, Ayodele O, Akinwusi P, et al. Haemodialysis practice in a resource-limited setting in the tropics. *Ghana medical journal* 2013;47(1):4-9. [published Online First: 2013/05/11]
  58. Bello BT, Raji YR, Sanusi I, et al. Challenges of providing maintenance hemodialysis in a resource poor country: Experience from a single teaching hospital in Lagos, Southwest Nigeria. *Hemodialysis international International Symposium on Home Hemodialysis* 2013;17(3):427-33. doi: 10.1111/hdi.12024 [published Online First: 2013/02/05]
  59. El Minshawy O. End-stage renal disease in the El-Minia Governorate, upper Egypt: an epidemiological study. *Saudi journal of kidney diseases and transplantation : an official publication of the Saudi Center for Organ Transplantation, Saudi Arabia* 2011;22(5):1048-54. [published Online First: 2011/09/14]
  60. Okpechi IG, Rayner BL, Swanepoel CR. Nephrotic syndrome in adult black South Africans: HIV-associated nephropathy as the main culprit. *Journal of the National Medical Association* 2010;102(12):1193-7.
  61. Madala ND, Nkwanyana N, Dubula T, et al. Predictive performance of eGFR equations in South Africans of African and Indian ancestry compared with 99mTc-DTPA imaging. *International Urology & Nephrology* 2012;44(3):847-55. doi: <http://dx.doi.org/10.1007/s11255-011-9928-7>
  62. El Farouki MR, Bahadi A, Hamzi MA, et al. [Profile of chronic renal failure in diabetes at initiation of hemodialysis in the nephrology and dialysis service of the military hospital in Rabat, Morocco]. *The Pan African medical journal* 2013;15:124. doi: 10.11604/pamj.2013.15.124.2252 [published Online First: 2013/11/21]
  63. Okpechi I, Swanepoel C, Duffield M, et al. Patterns of renal disease in Cape Town South Africa: a 10-year review of a single-centre renal biopsy database. *Nephrology Dialysis Transplantation* 2011;26(6):1853-61. doi: <http://dx.doi.org/10.1093/ndt/gfq655>
  64. Niang A, Cisse MM, Mahmoud SM, et al. Pilot experience in senegal with peritoneal dialysis for end-stage renal disease. *Peritoneal Dialysis International* 2014;34(5):539-43. doi: <http://dx.doi.org/10.3747/pdi.2011.00327>
  65. Buargub MA. 5-year mortality in hemodialysis patients: a single center study in Tripoli. *Saudi journal of kidney diseases and transplantation : an official publication of the Saudi Center for Organ Transplantation, Saudi Arabia* 2008;19(2):268-73. [published Online First: 2008/03/04]
  66. Chijioke A, Aderibigbe A, Olarenwaju TO, et al. Prevalence and pattern of cystic kidney diseases in Ilorin, Nigeria. *Saudi journal of kidney diseases and transplantation : an official publication of the Saudi Center for Organ Transplantation, Saudi Arabia* 2010;21(6):1172-8. [published Online First: 2010/11/10]
  67. Elsharif ME, Elsharif EG. Causes of end-stage renal disease in Sudan: a single-center experience. *Saudi journal of kidney diseases and transplantation : an official publication of the Saudi Center for Organ Transplantation,*



- 1  
2  
3  
4  
5  
6  
7  
8  
9  
10  
11  
12  
13  
14  
15  
16  
17  
18  
19  
20  
21  
22  
23  
24  
25  
26  
27  
28  
29  
30  
31  
32  
33  
34  
35  
36  
37  
38  
39  
40  
41  
42  
43  
44  
45  
46  
47  
48  
49  
50  
51  
52  
53  
54  
55  
56  
57  
58  
59  
60
- Saudi Arabia* 2011;22(2):373-6. [published Online First: 2011/03/23]
68. Elkhatib M, Elnahed MS, Fadda S, et al. The change in the spectrum of glomerulonephritis in Egypt over the past decade. *Saudi journal of kidney diseases and transplantation : an official publication of the Saudi Center for Organ Transplantation, Saudi Arabia* 2012;23(5):1065-7. doi: 10.4103/1319-2442.100955 [published Online First: 2012/09/18]
69. Ibrahim S, Fayed A, Fadda S, et al. A five-year analysis of the incidence of glomerulonephritis at Cairo University Hospital-Egypt. *Saudi journal of kidney diseases and transplantation : an official publication of the Saudi Center for Organ Transplantation, Saudi Arabia* 2012;23(4):866-70. doi: 10.4103/1319-2442.98191 [published Online First: 2012/07/19]
70. Ayach G, El-Filali H, Saidi S, et al. Histopathological study of pure primary nephrotic syndrome in adolescents and young Moroccan adults. *Arab journal of nephrology and transplantation* 2011;4(3):137-40. [published Online First: 2011/10/27]
71. Ramilitiana B, Ranivoharisoa EM, Dodo M, et al. [A retrospective study on the incidence of chronic renal failure in the Department of Internal Medicine and Nephrology at University Hospital of Antananarivo (the capital city of Madagascar)]. *The Pan African medical journal* 2016;23:141. doi: 10.11604/pamj.2016.23.141.8874 [published Online First: 2016/06/10]
72. Zajjari Y, Benyahia M, Ibrahim DM, et al. La néphropathie non diabétique chez les patients diabétiques de type 2 à l'hôpital militaire Mohammed V de Rabat (Maroc). *EMHJ* 2012;18(6)
73. Fatiu A, Abubakr S, Muzamil H, et al. Undiagnosed hypertension and proteinuria in a market population in Ile-Ife, Nigeria. *Arab journal of nephrology and transplantation* 2011;4(3):141-6. [published Online First: 2011/10/27]
74. Traore M, Traore HA, Kardorff R, et al. The public health significance of urinary schistosomiasis as a cause of morbidity in two districts in Mali. *The American journal of tropical medicine and hygiene* 1998;59(3):407-13. [published Online First: 1998/09/28]
75. Sumaili EK, Nseka NM, Lepira FB, et al. Screening for proteinuria and chronic kidney disease risk factors in Kinshasa: a World Kidney Day 2007 study. *Nephron Clinical practice* 2008;110(4):c220-8. doi: 10.1159/000167869 [published Online First: 2008/11/01]
76. Egbi OG, Okafor UH, Miebodei KE, et al. Prevalence and correlates of chronic kidney disease among civil servants in Bayelsa state, Nigeria. *Nigerian journal of clinical practice* 2014;17(5):602-7. doi: <http://dx.doi.org/10.4103/1119-3077.141426>
77. Ayodele OE, Okunola OO, Afolabi MO, et al. Prevalence of hypertension, diabetes and chronic kidney disease in participants of the 2009 World Kidney Day screening exercise in Southwest Nigeria. *Hong Kong Journal of Nephrology* 2011;13(2):55-63.
78. Abu-Aisha H, Elhassan A, Khamis A, et al. Chronic kidney disease in police forces households in Khartoum, Sudan: pilot report. *Arab journal of nephrology and transplantation* 2009;2(2):21-26.
79. Cailhol J, Nkurunziza B, Izzedine H, et al. Prevalence of chronic kidney disease among people living with HIV/AIDS in Burundi: a cross-sectional study. *BMC nephrology* 2011;12:40. doi: <http://dx.doi.org/10.1186/1471-2369-12-40>
80. Wools-Kaloustian K, Gupta SK, Muloma E, et al. Renal disease in an antiretroviral-naïve HIV-infected outpatient population in Western Kenya. *Nephrology Dialysis Transplantation* 2007;22(8):2208-12.
81. Emem CP, Arogundade F, Sanusi A, et al. Renal disease in HIV-seropositive patients in Nigeria: an assessment of prevalence, clinical features and risk factors. *Nephrology, dialysis, transplantation : official publication of the European Dialysis and Transplant Association - European Renal Association* 2008;23(2):741-6. doi: 10.1093/ndt/gfm836 [published Online First: 2007/12/11]
82. Wyatt CM, Shi Q, Novak JE, et al. Prevalence of kidney disease in HIV-infected and uninfected Rwandan women. *PLoS ONE [Electronic Resource]* 2011;6(3):e18352. doi: <http://dx.doi.org/10.1371/journal.pone.0018352>
83. FolefackKaze F, Kengne AP, Pefura Yone EW, et al. Renal function, urinalysis abnormalities and correlates among HIV-infected Cameroonians naïve to antiretroviral therapy. *Saudi Journal of Kidney Diseases & Transplantation* 2013;24(6):1291-7. doi: <http://dx.doi.org/10.4103/1319-2442.121280>
84. Struik GM, den Exter RA, Munthali C, et al. The prevalence of renal impairment among adults with early HIV disease in Blantyre, Malawi. *International journal of STD & AIDS* 2011;22(8):457-62. doi: 10.1258/ijsa.2011.010521 [published Online First: 2011/07/29]
85. Msango L, Downs JA, Kalluvya SE, et al. Renal dysfunction among HIV-infected patients starting antiretroviral therapy. *AIDS (London, England)* 2011;25(11):1421-5. doi: <http://dx.doi.org/10.1097/QAD.0b013e328348a4b1>
86. Janmohamed MN, Kalluvya SE, Mueller A, et al. Prevalence of chronic kidney disease in diabetic adult out-patients in Tanzania. *BMC nephrology* 2013;14(1):183.
87. Wanjohi FW, Otieno FC, Ogola EN, et al. Nephropathy in patients with recently diagnosed type 2 diabetes mellitus in black Africans. *East African medical journal* 2002;79(8):399-404. [published Online First: 2003/03/18]
88. Choukem SP, Dzudie A, Dehayem M, et al. Comparison of different blood pressure indices for the prediction of prevalent diabetic nephropathy in a sub-Saharan African population with type 2 diabetes. *The Pan African medical journal* 2012;11:67. [published Online First: 2012/06/02]

- 1
- 2
- 3 89. Plange-Rhule J, Phillips R, Acheampong JW, et al. Hypertension and renal failure in Kumasi, Ghana. *Journal of human hypertension* 1999;13(1):37-40.
- 4
- 5 90. Kalyesubula R, Nankabirwa JI, Ssinabulya I, et al. Kidney disease in Uganda: a community based study. *BMC nephrology* 2017;18(1):116. doi: 10.1186/s12882-017-0521-x [published Online First: 2017/04/05]
- 6
- 7 91. Kaze FF, Halle MP, Mopa HT, et al. Prevalence and risk factors of chronic kidney disease in urban adult Cameroonians according to three common estimators of the glomerular filtration rate: a cross-sectional study. *BMC nephrology* 2015;16:96. doi: 10.1186/s12882-015-0102-9 [published Online First: 2015/07/08]
- 8
- 9 92. Lunyera J, Stanifer JW, Ingabire P, et al. Prevalence and correlates of proteinuria in Kampala, Uganda: a cross-sectional pilot study. *BMC research notes* 2016;9:97. doi: 10.1186/s13104-016-1897-6 [published Online First: 2016/02/18]
- 10
- 11 93. Wachukwu CM, Emem-Chioma PC, Wokoma FS, et al. Prevalence of risk factors for chronic kidney disease among adults in a university community in southern Nigeria. *The Pan African medical journal* 2015;21:120. doi: 10.11604/pamj.2015.21.120.7079 [published Online First: 2015/09/04]
- 12
- 13 94. Odongo P, Wanyama R, Obol JH, et al. Impaired renal function and associated risk factors in newly diagnosed HIV-infected adults in Gulu Hospital, Northern Uganda. *BMC nephrology* 2015;16:43. doi: 10.1186/s12882-015-0035-3 [published Online First: 2015/04/17]
- 14
- 15 95. Feteh VF, Choukem SP, Kengne AP, et al. Anemia in type 2 diabetic patients and correlation with kidney function in a tertiary care sub-Saharan African hospital: a cross-sectional study. *BMC nephrology* 2016;17:29. doi: 10.1186/s12882-016-0247-1 [published Online First: 2016/03/21]
- 16
- 17 96. Pillay S, Aldous C, Mahomed F. A deadly combination - HIV and diabetes mellitus: Where are we now? *South African medical journal = Suid-Afrikaanse tydskrif vir geneeskunde* 2016;106(4):54. doi: 10.7196/SAMJ.2016.v106i4.9950 [published Online First: 2016/04/02]
- 18
- 19 97. Seck SM, Doupa D, Gueye L, et al. Chronic kidney disease epidemiology in northern Senegal: a cross-sectional study. *Iranian journal of kidney diseases* 2014;8(4):286-91.
- 20
- 21 98. Sumaili EK, Krzesinski JM, Zinga CV, et al. Prevalence of chronic kidney disease in Kinshasa: results of a pilot study from the Democratic Republic of Congo. *Nephrology Dialysis Transplantation* 2009;24(1):117-22. doi: <http://dx.doi.org/10.1093/ndt/gfn469>
- 22
- 23 99. Longo AL, Lepira FB, Sumaili EK, et al. Prevalence of low estimated glomerular filtration rate, proteinuria, and associated risk factors among HIV-infected black patients using Cockcroft-Gault and modification of diet in renal disease study equations. *Journal of Acquired Immune Deficiency Syndromes: JAIDS* 2012;59(1):59-64. doi: <http://dx.doi.org/10.1097/QAI.0b013e31823587b0>
- 24
- 25 100. Fana GT, Ndhlovu CE. Renal dysfunction among anti-retroviral therapy naive HIV infected patients in Zimbabwe. *The Central African journal of medicine* 2011;57(1-4):1-5. [published Online First: 2011/01/01]
- 26
- 27 101. Han TM, Naicker S, Ramdial PK, et al. A cross-sectional study of HIV-seropositive patients with varying degrees of proteinuria in South Africa. *Kidney international* 2006;69(12):2243-50.
- 28
- 29 102. Balogun WO, Abbiyesuku FM. Excess renal insufficiency among type 2 diabetic patients with dip-stick positive proteinuria in a tertiary hospital. *African journal of medicine and medical sciences* 2011;40(4):399-403. [published Online First: 2012/07/13]
- 30
- 31 103. Mafundikwa A, Ndhlovu CE, Gomo Z. The prevalence of diabetic nephropathy in adult patients with insulin dependent diabetes mellitus attending Parirenyatwa Diabetic Clinic, Harare. *The Central African journal of medicine* 2007;53(1-4):1-6. [published Online First: 2007/01/01]
- 32
- 33 104. Hamdouk M, Abdelraheem M, Taha A, et al. The association between prolonged occupational exposure to paraphenylenediamine (hair-dye) and renal impairment. *Arab journal of nephrology and transplantation* 2011;4(1):21-5. [published Online First: 2011/04/08]
- 34
- 35 105. Oluyombo R, Ayodele OE, Akinwusi PO, et al. A community study of the prevalence, risk factors and pattern of chronic kidney disease in osun state, South west Nigeria. *West African journal of medicine* 2013;32(2):85-92.
- 36
- 37 106. Prevalence of Chronic Kidney Disease and Associated Risk Factors: First Results from a Population Based Screening Program in Morocco(MAREMAR) [ASN abstract 353]; 2012. *J Am Soc Nephrol*.
- 38
- 39 107. Masimango MI, Sumaili EK, Jadoul M, et al. Prevalence of microalbuminuria and diagnostic value of dipstick proteinuria in outpatients from HIV clinics in Bukavu, the Democratic Republic of Congo. *BMC nephrology* 2014;15(1):146. doi: 10.1186/1471-2369-15-146 [published Online First: 2014/09/06]
- 40
- 41 108. Fabian J, Naicker S, Venter WD, et al. Urinary screening abnormalities in antiretroviral-naive HIV-infected outpatients and implications for management--a single-center study in South Africa. *Ethnicity & disease* 2009;19(1 Suppl 1):S1-80-5.
- 42
- 43 109. Sarfo FS, Keegan R, Appiah L, et al. High prevalence of renal dysfunction and association with risk of death amongst HIV-infected Ghanaians. *The Journal of infection* 2013;67(1):43-50. doi: 10.1016/j.jinf.2013.03.008 [published Online First: 2013/04/02]
- 44
- 45 110. Jao J, Palmer D, Leus I, et al. Prevalence and predictors of proteinuria in HIV-infected and uninfected pregnant women in Cameroon. *Nephrology, dialysis, transplantation : official publication of the European Dialysis and Transplant Association - European Renal Association* 2011;26(9):3051-3. doi: 10.1093/ndt/gfr310 [published Online First: 2011/07/02]
- 46
- 47 111. Makulo Jr R, Nseka MN, Jadoul M, et al. Albuminurie pathologique lors du dépistage du diabète en milieu semi-
- 48
- 49
- 50
- 51
- 52
- 53
- 54
- 55
- 56
- 57
- 58
- 59
- 60

- rural (cité de Kisantu en RD Congo). *Nephrologie & thérapeutique* 2010;6(6):513-19.
112. Kaze FF, Kengne AP, Magatsing CT, et al. Prevalence and Determinants of Chronic Kidney Disease Among Hypertensive Cameroonians According to Three Common Estimators of the Glomerular Filtration Rate. *Journal of clinical hypertension (Greenwich, Conn)* 2016;18(5):408-14. doi: 10.1111/jch.12781 [published Online First: 2016/01/23]
113. Ayokunle DS, Olusegun OT, Ademola A, et al. Prevalence of chronic kidney disease in newly diagnosed patients with Human immunodeficiency virus in Ilorin, Nigeria. *Jornal brasileiro de nefrologia : 'orgao oficial de Sociedades Brasileira e Latino-Americana de Nefrologia* 2015;37(2):177-84. doi: 10.5935/0101-2800.20150029 [published Online First: 2015/07/15]
114. Chadwick DR, Sarfo FS, Kirk ES, et al. Tenofovir is associated with increased tubular proteinuria and asymptomatic renal tubular dysfunction in Ghana. *BMC nephrology* 2015;16:195. doi: 10.1186/s12882-015-0192-4 [published Online First: 2015/12/03]
115. Glaser N, Phiri S, Bruckner T, et al. The prevalence of renal impairment in individuals seeking HIV testing in Urban Malawi. *BMC nephrology* 2016;17(1):186. doi: 10.1186/s12882-016-0403-7 [published Online First: 2016/11/24]
116. Pruijm MT, Madeleine G, Riesen WF, et al. Prevalence of microalbuminuria in the general population of Seychelles and strong association with diabetes and hypertension independent of renal markers. *Journal of hypertension* 2008;26(5):871-7. doi: <http://dx.doi.org/10.1097/HJH.0b013e3282f624d9>
117. Gouda Z, Mashaal G, Bello A, et al. Egypt information, prevention, and treatment of chronic kidney disease (EGIPT-CKD) programme: Prevalence and risk factors for microalbuminuria among the relatives of patients with CKD in Egypt. *Saudi Journal of Kidney Diseases and Transplantation* 2011;22(5):1055.
118. Attolou V, Bigot A, Ayivi B, et al. [Renal complications associated with human acquired immunodeficiency virus infection in a population of hospital patients at the Hospital and University National Center in Cotonou]. *Sante (Montrouge, France)* 1998;8(4):283-6. [published Online First: 1998/10/30]
119. Bouzid C, Smida H, Kacem A, et al. [Renal failure in Tunisian patients with type 2 diabetes: frequency and related factors]. *La Tunisie medicale* 2011;89(1):10-5. [published Online First: 2011/01/27]
120. Keeton GR, Smit R, Bryer A. Renal outcome of type 2 diabetes in South Africa--a 12-year follow-up study. *South African Medical Journal* 2004;94(9):771-5.
121. Bouaziz A, Zidi I, Zidi N, et al. Nephropathy following type 2 diabetes mellitus in Tunisian population. *The West Indian medical journal* 2012;61(9):881-9. [published Online First: 2013/09/12]
122. Katchunga P, Hermans MP, Manwa B, et al. [Hypertension, insulin resistance and chronic kidney disease in type 2 diabetes patients from South Kivu, DR Congo]. *Nephrologie et Therapeutique* 2010;6(6):520-5. doi: <http://dx.doi.org/10.1016/j.nephro.2010.04.002>
123. Djrolo F, Attolou VG, Avode DG, et al. [Diabetic nephropathy: an epidemiological study based on proteinuria in a population of black African diabetics in Cotonou, Benin]. *Sante (Montrouge, France)* 2001;11(2):105-9.
124. Lutale JJ, Thordarson H, Abbas ZG, et al. Microalbuminuria among type 1 and type 2 diabetic patients of African origin in Dar Es Salaam, Tanzania. *BMC nephrology* 2007;8(1):2.
125. Gill G, Gebrekidan A, English P, et al. Diabetic complications and glycaemic control in remote North Africa. *QJM : monthly journal of the Association of Physicians* 2008;101(10):793-98.
126. Osafo C, Mate-Kole M, Affram K, et al. Prevalence of chronic kidney disease in hypertensive patients in Ghana. *Renal failure* 2011;33(4):388-92. doi: <http://dx.doi.org/10.3109/0886022X.2011.565140>
127. Lengani A, Samadoulougou A, Cisse M. [Characteristics of renal disease in hypertensive morbidities in adults in Burkina Faso]. *Archives des maladies du coeur et des vaisseaux* 2000;93(8):1053-7.
128. Rayner B, Becker P. The prevalence of microalbuminuria and ECG left ventricular hypertrophy in hypertensive patients in private practices in South Africa. *Cardiovascular Journal of Southern Africa* 2006;17(5):245-9.
129. IA EL-S, Gadallah M, Shouman AE, et al. Subclinical nephrotoxicity caused by smoking and occupational silica exposure among Egyptian industrial workers. *Archives of medical research* 2003;34(5):415-21. doi: 10.1016/s0188-4409(03)00077-8 [published Online First: 2003/11/07]
130. Laurence EC, Volmink J, Esterhuizen TM, et al. Risk of cardiovascular disease among teachers in Cape Town: Findings of the South African PaCT pilot study. *South African medical journal = Suid-Afrikaanse tydskrif vir geneeskunde* 2016;106(10):996-1001. doi: 10.7196/SAMJ.2016.v106i10.10869 [published Online First: 2016/10/12]
131. Mogueo A, Echouffo-Tcheugui JB, Matsha TE, et al. Validation of two prediction models of undiagnosed chronic kidney disease in mixed-ancestry South Africans. *BMC nephrology* 2015;16:94. doi: 10.1186/s12882-015-0093-6 [published Online First: 2015/07/05]
132. Stanifer JW, Egger JR, Turner EL, et al. Neighborhood clustering of non-communicable diseases: results from a community-based study in Northern Tanzania. *BMC public health* 2016;16:226. doi: 10.1186/s12889-016-2912-5 [published Online First: 2016/03/06]
133. Stanifer JW, Maro V, Egger J, et al. The epidemiology of chronic kidney disease in Northern Tanzania: a population-based survey. *PLoS one* 2015;10(4):e0124506. doi: 10.1371/journal.pone.0124506 [published Online First: 2015/04/18]
134. Stanifer JW, Turner EL, Egger JR, et al. Knowledge, Attitudes, and Practices Associated with Chronic Kidney

- Disease in Northern Tanzania: A Community-Based Study. *PloS one* 2016;11(6):e0156336. doi: 10.1371/journal.pone.0156336 [published Online First: 2016/06/10]
135. Anyabolu EN, Chukwuonye, II, Arodiwe E, et al. Prevalence and predictors of chronic kidney disease in newly diagnosed human immunodeficiency virus patients in Owerri, Nigeria. *Indian journal of nephrology* 2016;26(1):10-5. doi: 10.4103/0971-4065.156115 [published Online First: 2016/03/05]
136. Okafor UH, Unuigbo EI, Chukwuonye E. Prevalence and clinical and laboratory characteristics of kidney disease in anti-retroviral-naive human immunodeficiency virus-infected patients in South-South Nigeria. *Saudi journal of kidney diseases and transplantation : an official publication of the Saudi Center for Organ Transplantation, Saudi Arabia* 2016;27(1):129-34. doi: 10.4103/1319-2442.174155 [published Online First: 2016/01/21]
137. Wensink GE, Schoffelen AF, Tempelman HA, et al. Albuminuria Is Associated with Traditional Cardiovascular Risk Factors and Viral Load in HIV-Infected Patients in Rural South Africa. *PloS one* 2015;10(8):e0136529. doi: 10.1371/journal.pone.0136529 [published Online First: 2015/08/27]
138. Eghan BA, Jr., Frempong MT, Adjei-Poku M. Prevalence and predictors of microalbuminuria in patients with diabetes mellitus: a cross-sectional observational study in Kumasi, Ghana. *Ethnicity & disease* 2007;17(4):726-30. [published Online First: 2007/12/13]
139. Aryee C, Owiredu WK, Osei-Yeboah J, et al. An Analysis of Anthropometric Indicators and Modifiable Lifestyle Parameters Associated with Hypertensive Nephropathy. *International journal of hypertension* 2016;2016:6598921. doi: 10.1155/2016/6598921 [published Online First: 2016/10/25]
140. Nabbaale J, Kibirige D, Ssekasanvu E, et al. Microalbuminuria and left ventricular hypertrophy among newly diagnosed black African hypertensive patients: a cross sectional study from a tertiary hospital in Uganda. *BMC research notes* 2015;8:198. doi: 10.1186/s13104-015-1156-2 [published Online First: 2015/05/15]
141. Addo J, Smeeth L, Leon DA. Hypertensive target organ damage in Ghanaian civil servants with hypertension. *PloS one* 2009;4(8):e6672. doi: 10.1371/journal.pone.0006672 [published Online First: 2009/08/25]
142. Owiredu WK, Quaye L, Amidu N, et al. Renal insufficiency in Ghanaian HIV infected patients: need for dose adjustment. *African health sciences* 2013;13(1):101-11. doi: <http://dx.doi.org/10.4314/ahs.v13i1.14>
143. Stöhr W, Reid A, Walker AS, et al. Glomerular dysfunction and associated risk factors over 4-5 years following antiretroviral therapy initiation in Africa. *Antiviral therapy* 2011;16(7):1011-20. doi: <http://dx.doi.org/10.3851/IMP1832>
144. Stöhr W, Walker AS, Munderi P, et al. Estimating glomerular filtration rate in HIV-infected adults in Africa: comparison of Cockcroft-Gault and Modification of Diet in Renal Disease formulae. *Antiviral therapy* 2008;13(6):761-70. [published Online First: 2008/10/09]
145. Reid A, Stöhr W, Walker AS, et al. Severe renal dysfunction and risk factors associated with renal impairment in HIV-infected adults in Africa initiating antiretroviral therapy. *Clinical Infectious Diseases* 2008;46(8):1271-81. doi: <http://dx.doi.org/10.1086/533468>
146. Ekat MH, Courpotin C, Diafouka M, et al. [Prevalence and factors associated with renal disease among patients with newly diagnoses of HIV in Brazzaville, Republic of Congo]. *Medecine et sante tropicales* 2013;23(2):176-80. doi: 10.1684/mst.2013.0170 [published Online First: 2013/06/22]
147. Peters PJ, Moore DM, Mermin J, et al. Antiretroviral therapy improves renal function among HIV-infected Ugandans. *Kidney international* 2008;74(7):925-9. doi: 10.1038/ki.2008.305 [published Online First: 2008/07/11]
148. Peck R, Baisley K, Kavishe B, et al. Decreased renal function and associated factors in cities, towns and rural areas of Tanzania: a community-based population survey. *Tropical medicine & international health : TM & IH* 2016;21(3):393-404. doi: 10.1111/tmi.12651 [published Online First: 2015/12/09]
149. Nsagha DS, Pokam BT, Assob JC, et al. HAART, DOTS and renal disease of patients co-infected with HIV/AIDS and TB in the South West Region of Cameroon. *BMC public health* 2015;15:1040. doi: 10.1186/s12889-015-2331-z [published Online First: 2015/10/11]
150. Mekuria Y, Yilma D, Mekonnen Z, et al. Renal Function Impairment and Associated Factors among HAART Naive and Experienced Adult HIV Positive Individuals in Southwest Ethiopia: A Comparative Cross Sectional Study. *PloS one* 2016;11(8):e0161180. doi: 10.1371/journal.pone.0161180 [published Online First: 2016/08/19]
151. Adebamowo SN, Adeyemo AA, Tekola-Ayele F, et al. Impact of Type 2 Diabetes on Impaired Kidney Function in Sub-Saharan African Populations. *Frontiers in endocrinology* 2016;7:50. doi: 10.3389/fendo.2016.00050 [published Online First: 2016/06/16]
152. Fiseha T, Kassim M, Yemane T. Chronic kidney disease and underdiagnosis of renal insufficiency among diabetic patients attending a hospital in Southern Ethiopia. *BMC nephrology* 2014;15:198. doi: 10.1186/1471-2369-15-198 [published Online First: 2014/12/17]
153. Odenigbo C, Oguejiofor O, Onwubuya E, et al. The prevalence of chronic kidney disease in apparently healthy retired subjects in asaba, Nigeria. *Annals of medical and health sciences research* 2014;4(Suppl 2):S128-32. doi: 10.4103/2141-9248.138031
154. Lucas GM, Clarke W, Kagaayi J, et al. Decreased kidney function in a community-based cohort of HIV-Infected and HIV-negative individuals in Rakai, Uganda. *Journal of Acquired Immune Deficiency Syndromes: JAIDS* 2010;55(4):491-4. doi: <http://dx.doi.org/10.1097/QAI.0b013e3181e8d5a8>

- 1  
2  
3 155. Booyens HL, Woodiwiss AJ, Raymond A, et al. Chronic kidney disease epidemiology collaboration-derived  
4 glomerular filtration rate performs better at detecting preclinical end-organ changes than alternative equations  
5 in black Africans. *Journal of hypertension* 2016;34(6):1178-85. doi: 10.1097/hjh.0000000000000924  
6 [published Online First: 2016/04/02]
- 7 156. Seape T, Gounden V, van Deventer HE, et al. Cystatin C- and creatinine-based equations in the assessment of  
8 renal function in HIV-positive patients prior to commencing Highly Active Antiretroviral Therapy. *Annals of  
9 clinical biochemistry* 2016;53(Pt 1):58-66. doi: 10.1177/0004563215579695 [published Online First:  
10 2015/03/15]
- 11 157. Zachor H, Machekano R, Estrella MM, et al. Incidence of stage 3 chronic kidney disease and progression on  
12 tenofovir-based regimens. *AIDS (London, England)* 2016;30(8):1221-8. doi: 10.1097/qad.0000000000001041  
13 [published Online First: 2016/02/03]
- 14 158. Adedeji TA, Adedeji NO, Adebisi SA, et al. Prevalence and Pattern of Chronic Kidney Disease in Antiretroviral-  
15 Naive Patients with HIV/AIDS. *Journal of the International Association of Providers of AIDS Care*  
16 2015;14(5):434-40. doi: 10.1177/2325957415587570 [published Online First: 2015/05/28]
- 17 159. Matsha TE, Soita DJ, Hassan SM, et al. Deterioration, improvement of kidney function over time and determinants  
18 in the Cape Town Bellville South cohort. *Nephrology (Carlton, Vic)* 2014;19(10):638-47. doi:  
19 10.1111/nep.12313 [published Online First: 2014/07/22]
- 20 160. Jao J, Lo W, Toro PL, et al. Factors associated with decreased kidney function in HIV-infected adults enrolled in  
21 the MTCT-Plus Initiative in sub-Saharan Africa. *Journal of Acquired Immune Deficiency Syndromes: JAIDS*  
22 2011;57(1):40-5. doi: <http://dx.doi.org/10.1097/QAI.0b013e31821008eb>
- 23 161. Gupta SK, Ong'or WO, Shen C, et al. Reduced renal function is associated with progression to AIDS but not with  
24 overall mortality in HIV-infected Kenyan adults not initially requiring combination antiretroviral therapy.  
25 *Journal of the International AIDS Society* 2011;14:31. doi: 10.1186/1758-2652-14-31 [published Online First:  
26 2011/06/15]
- 27 162. Myer L, Kamkuemah M, Kaplan R, et al. Low prevalence of renal dysfunction in HIV-infected pregnant women:  
28 implications for guidelines for the prevention of mother-to-child transmission of HIV. *Tropical Medicine &  
29 International Health* 2013;18(11):1400-5. doi: <http://dx.doi.org/10.1111/tmi.12194>
- 30 163. Mulenga LB, Kruse G, Lakhi S, et al. Baseline renal insufficiency and risk of death among HIV-infected adults on  
31 antiretroviral therapy in Lusaka, Zambia. *AIDS (London, England)* 2008;22(14):1821-7. doi:  
32 10.1097/QAD.0b013e328307a051 [published Online First: 2008/08/30]
- 33 164. Ajayi S, Mamven M, Ojji D. eGFR and chronic kidney disease stages among newly diagnosed asymptomatic  
34 hypertensives and diabetics seen in a tertiary health center in Nigeria. *Ethnicity & disease* 2014;24(2):220-5.  
35 [published Online First: 2014/05/09]
- 36 165. Nwankwo EA, Nwankwo B, Mubi B. Prevalence of impaired kidney function in hospitalized hypertensive patients  
37 in Maiduguri, Nigeria. *The Internet Journal of Internal Medicine* 2006;6(1)
- 38 166. Edwards JK, Bygrave H, Van den Bergh R, et al. HIV with non-communicable diseases in primary care in Kibera,  
39 Nairobi, Kenya: characteristics and outcomes 2010-2013. *Transactions of the Royal Society of Tropical  
40 Medicine and Hygiene* 2015;109(7):440-6. doi: 10.1093/trstmh/trv038 [published Online First: 2015/05/23]
- 41 167. Kamkuemah M, Kaplan R, Bekker LG, et al. Renal impairment in HIV-infected patients initiating tenofovir-  
42 containing antiretroviral therapy regimens in a Primary Healthcare Setting in South Africa. *Tropical medicine  
43 & international health : TM & IH* 2015;20(4):518-26. doi: 10.1111/tmi.12446 [published Online First:  
44 2014/12/03]
- 45 168. Levey AS, Coresh J, Balk E, et al. National Kidney Foundation practice guidelines for chronic kidney disease:  
46 evaluation, classification, and stratification. *Annals of internal medicine* 2003;139(2):137-47.
- 47 169. Abdelsatir S, Al-Sofi A, Elamin S, et al. The potential role of nursing students in the implementation of  
48 community-based hypertension screening programs in Sudan. *Arab journal of nephrology and transplantation*  
49 2013;6(1):51-4. [published Online First: 2013/01/04]
- 50 170. Agaba EI, Agaba PA, Sirisena ND, et al. Renal disease in the acquired immunodeficiency syndrome in north  
51 central Nigeria. *Nigerian journal of medicine : journal of the National Association of Resident Doctors of  
52 Nigeria* 2003;12(3):120-5. [published Online First: 2004/01/24]
- 53 171. Coresh J, Astor BC, McQuillan G, et al. Calibration and random variation of the serum creatinine assay as critical  
54 elements of using equations to estimate glomerular filtration rate. *American journal of kidney diseases : the  
55 official journal of the National Kidney Foundation* 2002;39(5):920-9. doi: 10.1053/ajkd.2002.32765  
56 [published Online First: 2002/04/30]
- 57 172. Liu WS, Chung YT, Yang CY, et al. Serum creatinine determined by Jaffe, enzymatic method, and isotope  
58 dilution-liquid chromatography-mass spectrometry in patients under hemodialysis. *Journal of clinical  
59 laboratory analysis* 2012;26(3):206-14. doi: 10.1002/jcla.21495 [published Online First: 2012/05/26]
- 60 173. Drion I, Cobbaert C, Groenier KH, et al. Clinical evaluation of analytical variations in serum creatinine  
measurements: why laboratories should abandon Jaffe techniques. *BMC nephrology* 2012;13(1):133.
174. Bachmann LM, Nilsson G, Bruns DE, et al. State of the art for measurement of urine albumin: comparison of  
routine measurement procedures to isotope dilution tandem mass spectrometry. *Clinical chemistry*  
2014;60(3):471-80. doi: 10.1373/clinchem.2013.210302 [published Online First: 2013/11/28]

- 1  
2  
3  
4  
5  
6  
7  
8  
9  
10  
11  
12  
13  
14  
15  
16  
17  
18  
19  
20  
21  
22  
23  
24  
25  
26  
27  
28  
29  
30  
31  
32  
33  
34  
35  
36  
37  
38  
39  
40  
41  
42  
43  
44  
45  
46  
47  
48  
49  
50  
51  
52  
53  
54  
55  
56  
57  
58  
59  
60
175. Levey AS, Stevens LA. Estimating GFR using the CKD epidemiology collaboration (CKD-EPI) creatinine equation: more accurate GFR estimates, lower CKD prevalence estimates, and better risk predictions. *American journal of kidney diseases: the official journal of the National Kidney Foundation* 2010;55(4):622.
176. Poggio ED, Rule AD. A critical evaluation of chronic kidney disease—should isolated reduced estimated glomerular filtration rate be considered a ‘disease’? *Nephrology Dialysis Transplantation* 2009;24(3):698-700.
177. Hill NR, Fatoba ST, Oke JL, et al. Global Prevalence of Chronic Kidney Disease—A Systematic Review and Meta-Analysis. *PloS one* 2016;11(7):e0158765.
178. Saran R, Li Y, Robinson B, et al. US Renal Data System 2014 Annual Data Report: Epidemiology of Kidney Disease in the United States. *American journal of kidney diseases : the official journal of the National Kidney Foundation* 2015;66(1 Suppl 1):Svii, S1-305. doi: 10.1053/j.ajkd.2015.05.001 [published Online First: 2015/06/27]
179. Bruck K, Stel VS, Gambaro G, et al. CKD Prevalence Varies across the European General Population. *Journal of the American Society of Nephrology : JASN* 2016;27(7):2135-47. doi: 10.1681/asn.2015050542 [published Online First: 2015/12/25]
180. Ingsathit A, Thakkinstian A, Chaiprasert A, et al. Prevalence and risk factors of chronic kidney disease in the Thai adult population: Thai SEEK study. *Nephrology Dialysis Transplantation* 2010;25(5):1567-75.
181. Singh AK, Farag YM, Mittal BV, et al. Epidemiology and risk factors of chronic kidney disease in India - results from the SEEK (Screening and Early Evaluation of Kidney Disease) study. *BMC nephrology* 2013;14:114. doi: 10.1186/1471-2369-14-114 [published Online First: 2013/05/30]
182. Imai E, Horio M, Watanabe T, et al. Prevalence of chronic kidney disease in the Japanese general population. *Clinical and experimental nephrology* 2009;13(6):621-30. doi: 10.1007/s10157-009-0199-x [published Online First: 2009/06/11]
183. Hwang SJ, Tsai JC, Chen HC. Epidemiology, impact and preventive care of chronic kidney disease in Taiwan. *Nephrology (Carlton, Vic)* 2010;15 Suppl 2:3-9. doi: 10.1111/j.1440-1797.2010.01304.x [published Online First: 2010/07/09]
184. Lin B, Shao L, Luo Q, et al. Prevalence of chronic kidney disease and its association with metabolic diseases: a cross-sectional survey in Zhejiang province, Eastern China. *BMC nephrology* 2014;15:36. doi: 10.1186/1471-2369-15-36 [published Online First: 2014/02/25]
185. Tomonaga Y, Risch L, Szucs TD, et al. The Prevalence of Chronic Kidney Disease in a Primary Care Setting: A Swiss Cross-Sectional Study. *PloS one* 2013;8(7):e67848. doi: 10.1371/journal.pone.0067848
186. Jha V, Garcia-Garcia G, Iseki K, et al. Chronic kidney disease: global dimension and perspectives. *Lancet* 2013;382(9888):260-72. doi: 10.1016/s0140-6736(13)60687-x [published Online First: 2013/06/04]
187. Barsoum RS. Chronic kidney disease in the developing world. *The New England journal of medicine* 2006;354(10):997-9. doi: 10.1056/NEJMp058318 [published Online First: 2006/03/10]
188. UNAIDS. HIV and AIDS estimates (2015) 2015 [cited 2015. Available from: <http://www.unaids.org/en/regionscountries/countries/senegal> accessed July 15, 2015.
189. UNAIDS. HIV and AIDS estimates (2015): UNAIDS; 2015 [Available from: <http://www.unaids.org/en/regionscountries/countries/swaziland> accessed August 1, 2015
190. Matic S, Lazarus JV, Donoghoe MC. HIV/AIDS in Europe: moving from death sentence to chronic disease management: World Health Organization 2006.
191. Estrella M, Fine DM, Gallant JE, et al. HIV type 1 RNA level as a clinical indicator of renal pathology in HIV-infected patients. *Clinical infectious diseases : an official publication of the Infectious Diseases Society of America* 2006;43(3):377-80. doi: 10.1086/505497 [published Online First: 2006/06/29]
192. Deti EK, Thiebaut R, Bonnet F, et al. Prevalence and factors associated with renal impairment in HIV-infected patients, ANRS C03 Aquitaine Cohort, France. *HIV Med* 2010;11(5):308-17. doi: 10.1111/j.1468-1293.2009.00780.x [published Online First: 2009/12/17]
193. Fernando SK, Finkelstein FO, Moore BA, et al. Prevalence of chronic kidney disease in an urban HIV infected population. *American Journal of the Medical Sciences* 2008;335(2):89-94. doi: <http://dx.doi.org/10.1097/MAJ.0b013e31812e6b34>
194. Cao Y, Gong M, Han Y, et al. Prevalence and risk factors for chronic kidney disease among HIV-infected antiretroviral therapy-naïve patients in Mainland China: A multicenter cross-sectional study. *Nephrology* 2013;18(4):307-12. doi: 10.1111/nep.12031
195. Rustarazo SB, Fuente SR, de Miguel SC, et al. Prevalence and spectrum of chronic kidney disease in HIV-positive patients. *European Journal of Hospital Pharmacy: Science and Practice* 2012;19(2):96-97.
196. Menezes AM, Torelly J, Jr., Real L, et al. Prevalence and risk factors associated to chronic kidney disease in HIV-infected patients on HAART and undetectable viral load in Brazil. *PloS one* 2011;6(10):e26042. doi: 10.1371/journal.pone.0026042 [published Online First: 2011/10/25]
197. Sicotte M, Langlois ÉV, Aho J, et al. Association between nutritional status and the immune response in HIV+ patients under HAART: protocol for a systematic review. *Systematic reviews* 2014;3(1):9.
198. Taylor BS, Sobieszczyk ME, McCutchan FE, et al. The challenge of HIV-1 subtype diversity. *The New England journal of medicine* 2008;358(15):1590-602. doi: 10.1056/NEJMra0706737 [published Online First:

- 1  
2  
3 2008/04/12]
- 4 199. Wools-Kaloustian KK, Gupta SK. Will there be an epidemic of HIV-related chronic kidney disease in sub-Saharan  
5 Africa? Too soon to tell. *Kidney international* 2008;74(7):845-7. doi: 10.1038/ki.2008.326 [published Online  
6 First: 2008/09/17]
- 7 200. Pokroy-Shapira E, Gelernter I, Molad Y. Evolution of chronic kidney disease in patients with systemic lupus  
8 erythematosus over a long-period follow-up: a single-center inception cohort study. *Clinical rheumatology*  
9 2014;33(5):649-57.
- 10 201. Mak A, Mok CC, Chu WP, et al. Renal damage in systemic lupus erythematosus: a comparative analysis of  
11 different age groups. *Lupus* 2007;16(1):28-34. [published Online First: 2007/02/08]
- 12 202. Rabbani MA, Tahir MH, Siddiqui BK, et al. Renal involvement in systemic lupus erythematosus in Pakistan.  
13 *JPMA The Journal of the Pakistan Medical Association* 2005;55(8):328-32. [published Online First:  
14 2005/09/17]
- 15 203. Chiu H-Y, Huang H-L, Li C-H, et al. Increased risk of chronic kidney disease in rheumatoid arthritis associated  
16 with cardiovascular complications—A National Population-Based Cohort Study. *PloS one*  
17 2015;10(9):e0136508.
- 18 204. Barsoum RS. End-stage renal disease in North Africa. *Kidney international Supplement* 2003(83):S111-4. doi:  
19 10.1046/j.1523-1755.63.s83.23.x [published Online First: 2003/07/17]
- 20 205. Naicker S. End-stage renal disease in Sub-Saharan Africa. *Kidney inter, Suppl* 2013;3(2):161-63. doi:  
21 10.1038/kisup.2013.4
- 22 206. Naicker S. Challenges for nephrology practice in Sub-Saharan Africa. *Nephrology, dialysis, transplantation :*  
23 *official publication of the European Dialysis and Transplant Association - European Renal Association*  
24 2010;25(3):649-50. doi: 10.1093/ndt/gfp727
- 25 207. Noubiap JJ, Naidoo J, Kengne AP. Diabetic nephropathy in Africa: A systematic review. *World journal of diabetes*  
26 2015;6(5):759-73. doi: 10.4239/wjd.v6.i5.759 [published Online First: 2015/06/13]
- 27 208. Brook MO, Bottomley MJ, Mevada C, et al. Repeat testing is essential when estimating chronic kidney disease  
28 prevalence and associated cardiovascular risk. *QJM : monthly journal of the Association of Physicians*  
29 2012;105(3):247-55. doi: 10.1093/qjmed/hcr171 [published Online First: 2011/10/04]
- 30  
31  
32  
33  
34  
35  
36  
37  
38  
39  
40  
41  
42  
43  
44  
45  
46  
47  
48  
49  
50  
51  
52  
53  
54  
55  
56  
57  
58  
59  
60

1  
2  
3  
4  
5  
6  
7  
8  
9  
10  
11  
12  
13  
14  
15  
16  
17  
18  
19  
20  
21  
22  
23  
24  
25  
26  
27  
28  
29  
30  
31  
32  
33  
34  
35  
36  
37  
38  
39  
40  
41  
42  
43  
44  
45  
46  
47  
48  
49  
50  
51  
52  
53  
54  
55  
56  
57  
58  
59  
60

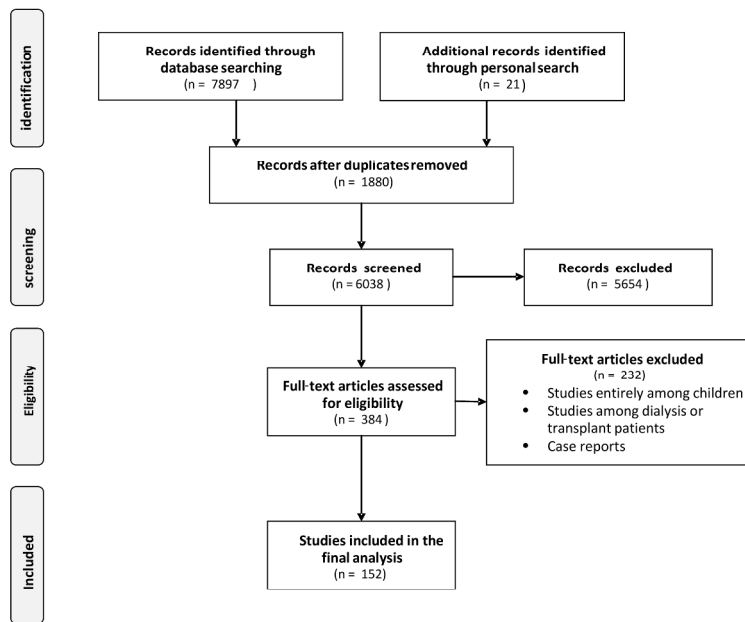

Fig 1

Fig1

254x190mm (300 x 300 DPI)



1  
2  
3  
4  
5  
6  
7  
8  
9  
10  
11  
12  
13  
14  
15  
16  
17  
18  
19  
20  
21  
22  
23  
24  
25  
26  
27  
28  
29  
30  
31  
32  
33  
34  
35  
36  
37  
38  
39  
40  
41  
42  
43  
44  
45  
46  
47  
48  
49  
50  
51  
52  
53  
54  
55  
56  
57  
58  
59  
60



**Fig 2**

Fig2

254x190mm (300 x 300 DPI)

ew only

1  
2  
3  
4  
5  
6  
7  
8  
9  
10  
11  
12  
13  
14  
15  
16  
17  
18  
19  
20  
21  
22  
23  
24  
25  
26  
27  
28  
29  
30  
31  
32  
33  
34  
35  
36  
37  
38  
39  
40  
41  
42  
43  
44  
45  
46  
47  
48  
49  
50  
51  
52  
53  
54  
55  
56  
57  
58  
59  
60

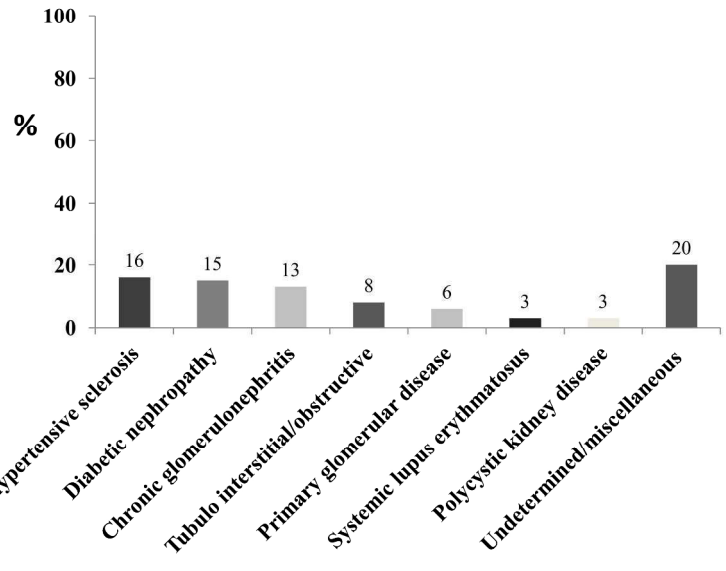

**Fig 3**

Fig 3

254x190mm (300 x 300 DPI)

ew only

**S1 Table.** Search strategy adopted in PubMed and Ovid MEDLINE

1. exp Renal Dialysis/
2. (hemodialysis or haemodialysis).tw.
3. (hemofiltration or haemofiltration).tw.
4. (hemodiafiltration or haemodiafiltration).tw.
5. dialysis.tw.
6. (CAPD or CCPD or APD).tw.
7. Renal Insufficiency/
8. Kidney Failure/
9. exp Renal Insufficiency, Chronic/
10. Kidney Diseases/
11. Uremia/
12. (end-stage renal or end-stage kidney or endstage renal or endstage kidney).tw.
13. (ESRF or ESKF or ESRD or ESKD).tw.
14. (chronic kidney or chronic renal).tw.
15. (CKF or CKD or CRF or CRD).tw.
16. (predialysis or pre-dialysis).tw.
17. ur?emi\$.tw.
18. 1 or 2 or 3 or 4 or 5 or 6 or 7 or 8 or 9 or 10 or 11 or 12 or 13 or 14 or 15 or 16 or 17
19. afric\$.ti,ab,kw,tw,mp.
20. 18 and 19

S2 Table: Studies among CKD patients

| Study ID                  | Year<br>Country<br>Region   | N   | Population Characteristic                                                                                                 | biopsy | causes of CKD                                                                                                                                                   |
|---------------------------|-----------------------------|-----|---------------------------------------------------------------------------------------------------------------------------|--------|-----------------------------------------------------------------------------------------------------------------------------------------------------------------|
| El Khayat S <sup>31</sup> | 2013, Morocco,<br>North     | 134 | Age( years): 54.4±18.1<br>Male gender: 58.65%                                                                             | no     | DN: 44.02%<br>H.scl: 11.2%<br>Tub.int: 9.7%<br>SLE: 5%<br>Ch.GN: 3.7%<br>Undetermined: 26.11%                                                                   |
| Seck S <sup>32</sup>      | 2013, Senegal,<br>West      | 60  | Age (years): 70.5±54.6<br>Male gender: 52%<br>Hypertension: 20%<br>SBP (mmHg): 167 ± 78<br>DBP (mmHg): 95 ± 55<br>DM: 18% | no     | H.scl: 30%<br>DN: 25%                                                                                                                                           |
| Seck S <sup>33</sup>      | 2008, Senegal,<br>West      | 118 | Age (years): 39.28±16.4<br>Male gender: 56%<br>SBP (mmHg): 160±15<br>DBP (mmHg): 90±15                                    | yes    | Ch.GN: 35%<br>Vascular nephropathy: 20.2%<br>Tub.int: 12%<br>DN: 10.5%<br>PKD: 4.2%<br>Autoimmune: 4.2%<br>Neoplasm: 1.6%<br>H.scl: 0.8%<br>Undetermined: 11.5% |
| Bourquia A <sup>34</sup>  | 2002, Morocco,<br>North     | 420 | Age (years): 46±3<br>Male gender: 52%                                                                                     | no     | PKD: 6.5%                                                                                                                                                       |
| Ouattara B <sup>35</sup>  | 2011, Ivory Coast,<br>West  | 301 | Age (years): 44±10<br>Male gender: 56%<br>Hypertension: 33.5%<br>DM: 12.3%                                                | no     | Nephroangiosclerosis:25.2%<br>HIV nephropathy:17%<br>Interstitial nephritis: 10.3%<br>DN: 9.6%<br>Ch.GN: 6.6%<br>PKD:2.3%<br>Undetermined: 29.2%                |
| Lengani A <sup>36</sup>   | 1997, Burkina<br>Faso, West | 174 | Age (years): 36±15<br>Male gender: 63%<br>Hypertension: 64.9%                                                             | no     | Ch.GN: 42.5%<br>Vascular nephropathy: 23.6%<br>Tub.int: 16.1%<br>PKD: 1%<br>Undetermined: 16.8%                                                                 |
| Afifi A <sup>37</sup>     | 2005, Egypt, North          | 220 | Not known                                                                                                                 | no     | DN: 28.2%<br>H.scl: 25.5%<br>Obstructive uropathy: 13.5%<br>Cystitis: 6.8%<br>Simple cyst: 4.5%<br>Undetermined: 29.5%                                          |
| Diouf B <sup>38</sup>     | 2000, Senegal,<br>West      | 261 | Age (years): 44(range:15-88)<br>Male gender: 46%                                                                          | no     | Nephroangiosclerosis: 25%<br>DN: 20.5%<br>Ch.GN: 15%<br>Undetermined : 34%                                                                                      |
| Niang A <sup>39</sup>     | 2008, Senegal,<br>West      | 258 | Age (years): 28 (range:15-79)<br>Male gender: 75%<br>Hypertension: 12.2%                                                  | yes    | FSGS: 52%<br>MGN: 12%<br>Minimal change diseases: 7.7%                                                                                                          |
| Sabi K <sup>40</sup>      | 2011, Togo, West            | 398 | Age (years): mean: 42.6                                                                                                   | not    | Ch.GN: 40.2%                                                                                                                                                    |

|                            |                        |      |                                                                                                                                  |       |                                                                                                                                                                                                                                                       |
|----------------------------|------------------------|------|----------------------------------------------------------------------------------------------------------------------------------|-------|-------------------------------------------------------------------------------------------------------------------------------------------------------------------------------------------------------------------------------------------------------|
|                            |                        |      | Male gender: 57%                                                                                                                 | known | Tub.int: 20.9%<br>Nephroangiosclerosis: 17.6%                                                                                                                                                                                                         |
| Ulasi I <sup>41</sup>      | 2010, Nigeria,<br>West | 1538 | Age (years): 42.55±15.43<br>Male gender: 65%<br>Hypertension: 17.2%<br>DM: 11.8%                                                 | yes   | H.scl: 17.2%<br>Ch.GN:14.6%<br>DN:11.8%<br>Undetermined:51.6%<br>Others: 4.6%                                                                                                                                                                         |
| AbdErrahim E <sup>42</sup> | 2001, Tunis,<br>North  | 1471 | Age (years): 38.3±14.6<br>Male gender: 69%                                                                                       | no    | DN: 20.3%                                                                                                                                                                                                                                             |
| Abdou N <sup>43</sup>      | 2003, Senegal,<br>West | 115  | Age (years): 28 (IQR:5-60)<br>Male gender: 56%                                                                                   | yes   | FSGS: 46.9%<br>MGN:8.7%<br>Minimal change disease:6.1%<br>Endocapillary GN: 2.6%<br>Mesangioproliferative: 1.7%<br>Extracapillary GN:1.7%<br>IgA nephropathy:1.7%<br>SLE: 13%<br>H.scl: 2%<br>Undetermined: 7%<br>Others:11%                          |
| Afifi A <sup>44</sup>      | 2004, Egypt, North     | 3172 | Age (years): 56.5±29.2                                                                                                           | yes   | DN: 14.5%                                                                                                                                                                                                                                             |
| Afifi A <sup>45</sup>      | 1999, Egypt, North     | 4905 | Age (years): 45.6±14.2<br>Male gender: 62.4%                                                                                     | yes   | H.scl: 28%<br>Ch.GN: 16.2%<br>Obstructive uropathy: 15%<br>DN: 8.9%<br>PKD: 3%<br>Undetermined: 16.2%                                                                                                                                                 |
| Agaba E <sup>46</sup>      | 2009, Nigeria,<br>West | 130  | Age (years): 41±16<br>Male gender: 68%                                                                                           | no    | Ch.GN: 39%<br>H.scl: 34.6%<br>DN: 11.8%<br>PKD: 6.9%<br>Undetermined: 7.7%                                                                                                                                                                            |
| Alashek W <sup>47</sup>    | 2012, Libya, North     | 2417 | Age (years): 49 (range: 36-61)<br>Male gender: 58%                                                                               | no    | DN: 26.5%<br>Ch.GN: 21.2%<br>H.scl: 14.6%<br>Congenital and hereditary: 12.3%<br>PKD: 6.3%<br>Obstructive uropathy: 5%<br>Chronic pyelonephritis: 2%<br>Interstitial nephritis: 1.2%<br>Autoimmune disease: 0.7%<br>Other: 2.9%<br>undetermined: 7.3% |
| Alasia D <sup>48</sup>     | 2012, Nigeria,<br>West | 320  | Age (years): 46.2±17.6<br>Male gender: 63%<br>SBP (mmHg): 171.2±31.9<br>DBP(mmHg): 102.5±27.4                                    | yes   | Ch.GN: 45.7%<br>H.scl: 29.8%<br>DN: 17.5%<br>PKD: 3%<br>Obstructive uropathy: 2%<br>Undetermined: 2%                                                                                                                                                  |
| Alebiosu C <sup>49</sup>   | 2006, Nigeria,<br>West | 153  | Age (years): 39.6±14.8<br>Male gender: 59%<br>Hypertension: 38.5%<br>SBP (mmHg): 167.3±15.5<br>DBP (mmHg): 106±28.9<br>DM: 13.1% | no    | Ch.GN: 41.2%<br>H.scl: 26.1%<br>DN: 13.1%                                                                                                                                                                                                             |

|                            |                           |      |                                                                                                                                                             |     |                                                                                                                                                                                                                                                                                                                                                                                                                          |
|----------------------------|---------------------------|------|-------------------------------------------------------------------------------------------------------------------------------------------------------------|-----|--------------------------------------------------------------------------------------------------------------------------------------------------------------------------------------------------------------------------------------------------------------------------------------------------------------------------------------------------------------------------------------------------------------------------|
| Amira C <sup>50</sup>      | 2012, Nigeria, West       | 201  | Age (years): 47.5±15.7<br>Male gender: 56.2<br>Hypertension: 42.8%<br>DM: 13.4%                                                                             | no  | H.scl: 42.8%<br>Ch.GN: 15.9%<br>Obstructive uropathy: 14.9%<br>DN: 13.4%<br>PKD: 1%<br>SLE: 1%<br>Sickle cell nephropathy: 1%<br>Analgesic nephropathy: 0.5%<br>Undetermined : 9.5%                                                                                                                                                                                                                                      |
| Arogundade F <sup>51</sup> | 2011, Nigeria, West       | 760  | Age(years): 36 (range:15-90)<br>Male gender: 70.3%<br>Hypertension: 72.4%<br>SBP (mmHg): 160 (range:120 – 270)<br>DBP (mmHg): 100 (range:50 – 209 )         | no  | Ch. GN: 43.7%<br>H.scl: 31.1%<br>Obstructive uropathy: 6.7%<br>DN: 3.7%<br>Tub.int: 2.2%<br>PKD: 0.7%<br>Undetermined : 12%                                                                                                                                                                                                                                                                                              |
| Counil É <sup>52</sup>     | 2008, Tunis, North        | 6397 | Age (years): 51.4±18.0<br>Male gender: 56.5%                                                                                                                | no  | DN: 35%<br>H.scl: 25.3%<br>Tub.int: 19.7%<br>Ch.GN: 13%<br>PKD: 2.2%<br>Undetermined: 52.8%                                                                                                                                                                                                                                                                                                                              |
| Chijioke A <sup>53</sup>   | 2012, Nigeria, West       | 116  | Age (years): Male: 50.89±13.43 and Female: 48.22±14.70<br>Male gender: 61.2%<br>SBP(mmHg): 153.41±27.12<br>DBP (mmHg): 93.92±17.19                          | no  | H.scl: 52.58%<br>Ch.GN: 17.2%<br>Tub.int: 17.1%<br>PKD: 4.3%<br>DN: 2.6%<br>Chronic pyelonephritis: 2.6%<br>Obstructive uropathy: 1.7%<br>Undetermined: 1.9%                                                                                                                                                                                                                                                             |
| Madala N <sup>54</sup>     | 2014, South Africa, South | 302  | Age (years): 47.1±17.0<br>Male gender: 45%<br>SBP (mmHg): (male) 144.6 ± 28.3. (female) 141.1 ± 25.5<br>DBP(mmHg): (male) 84.2 ± 18.1. (female) 81.0 ± 19.0 | yes | H.scl: 75.2%<br>DN: 29.8%<br>HIV nephropathy: 28.6%<br>Ch.GN: 7%<br>Tub.int: 6%<br>Undetermined: 6%                                                                                                                                                                                                                                                                                                                      |
| Okpechi I <sup>55</sup>    | 2013, South Africa, South | 111  | Age (years): 66.3 ± 5.7<br>Male gender: 47.7%<br>Hypertension: 71%<br>DM: 19.8%                                                                             | yes | MGN: 14.4%<br>Mesangioproliferative GN: 8.1%<br>Crescentic GN: 7.2%<br>Mesangiocapillary GN: 3.6%<br>Post infectious GN: 2.7%<br>FSGS: 1.8%<br>IgAN nephropathy: 0.9%<br>DN: 12.6%<br>Ch.GN: 5.4%<br>SLE: 4.5%<br>H.scl: 3.6%<br>Amyloidosis: 2.7%<br>Myeloma: 2.7%<br>Crescentic GN: 1.8%<br>HIV nephropathy: 0.9%<br>Thrombocytopenic purpura: 0.9%<br>Hemolytic uremic: 0.9%<br>Tub.int: 17.2%<br>Miscellaneous: 8.1% |

|                             |                           |      |                                                                                                                                                                         |     |                                                                                                                                                                                                                                                                                                                                                  |
|-----------------------------|---------------------------|------|-------------------------------------------------------------------------------------------------------------------------------------------------------------------------|-----|--------------------------------------------------------------------------------------------------------------------------------------------------------------------------------------------------------------------------------------------------------------------------------------------------------------------------------------------------|
| Laleye A <sup>56</sup>      | 2012, Benin, West         | 3783 | Age (years): 47.2 (range:29 - 70 )<br>Male gender: 24%<br>Hypertension: 59%                                                                                             | no  | PKD: 1.8%                                                                                                                                                                                                                                                                                                                                        |
| Okunola Y <sup>57</sup>     | 2013, Nigeria, West       | 300  | Age (years): 49 ±16.25<br>Male gender: 68%                                                                                                                              | no  | H.Scl: 38.8%<br>Ch.GN: 28.8%<br>DN:22.5%<br>PKD:2.7%<br>SLE: 1.1%<br>Undetermined: 6.1%                                                                                                                                                                                                                                                          |
| Bello B <sup>58</sup>       | 2013, Nigeria, West       | 120  | Age (years): 47 + 14<br>Male gender: 60%<br>SBP(mmHg): 162 ± 32<br>DBP(mmHg): 94.9 ± 19.6                                                                               | yes | H.scl: 45%<br>Ch.GN: 15.8%<br>DN: 12.5%<br>Obstructive uropathy : 12.5%<br>PKD: 3.3%<br>Ch. Pyelonephritis: 2.5%<br>SLE: 1.7%<br>Analgesic nephropathy: 1.7%<br>Sickle cell nephropathy: 1.7%<br>Toxic nephropathy: 0.8%<br>Undetermined: 2.5%                                                                                                   |
| El-Minshawy O <sup>59</sup> | 2011, Egypt, North        | 800  | Age(years): 46 ± 13<br>Male gender: 65%                                                                                                                                 | no  | H.scl: 20%<br>Obstructive uropathy: 15%<br>Ch.GN: 11%<br>SLE: 9%<br>DN: 8%<br>Analgesic nephropathy: 5%<br>Chronic pyelonephritis: 5%<br>Undetermined: 27%                                                                                                                                                                                       |
| Okpechi I <sup>60</sup>     | 2010, South Africa, South | 294  | Age (years): 33.9 ± 12.0<br>Male gender: 45.2%<br>Hypertension:39.8%                                                                                                    | yes | Crescentic GN: 5%<br>Ch GN: 15.7%<br>FSGS: 15.7%<br>IgA nephropathy: 1.7%<br>Minimal change disease: 6.6%<br>Mesangiocapillary GN: 19%<br>MGN: 14.9%<br>Mesangial proliferative GN: 12.4%<br>Postinfectious GN : 9%<br>HIV nephropathy: 42.8%<br>SLE: 13.3%<br>DN: 9.2%<br>MGN: 6.9%<br>Ch.GN: 5.85%<br>Mesnagiocapillary: 4.6%<br>Others: 17.4% |
| Madala N <sup>61</sup>      | 2012, South Africa, South | 148  | Age(years): 41.4 ± 13.1<br>Male gender: 37.2%<br>SBP (mmHg): African (133.6 ± 20.2). Indian (130.1 ± 20.6)<br>DBP (mmHg): African:(133.6 ± 20.2). Indian (130.1 ± 20.6) | no  | Ch.GN: 39.2%<br>H.scl: 34.4%<br>DN: 7.4%<br>PKD:6.8%<br>Undetermined: 3.4%                                                                                                                                                                                                                                                                       |
| El Farouki M <sup>62</sup>  | 2013, Morocco, North      | 207  | Age (years): 52.43 ± 15.48<br>Male gender: 64.3%<br>Hypertension: 73.9%<br>DM:41.5%                                                                                     | no  | DN: 41.5%<br>Ch.GN: 16%<br>Tub.int: 14%<br>H.scl: 12%                                                                                                                                                                                                                                                                                            |

|                          |                           |      |                                                                                          |     |                                                                                                                                                                                                                                                                                                                                                 |
|--------------------------|---------------------------|------|------------------------------------------------------------------------------------------|-----|-------------------------------------------------------------------------------------------------------------------------------------------------------------------------------------------------------------------------------------------------------------------------------------------------------------------------------------------------|
|                          |                           |      |                                                                                          |     | PKD: 1%<br>Undetermined: 15.5%                                                                                                                                                                                                                                                                                                                  |
| Okpechi I <sup>63</sup>  | 2011, South Africa, South | 1284 | Age (years): 36.8 ±14.0<br>Male gender: 45.2%                                            | yes | Mesangiocapillary: 20.4%<br>Mesangioproliferative: 19.2%<br>MGN: 18.5%<br>Crescentic GN: 11.4%<br>FSGS: 10.5%<br>Post infectious: 8.2%<br>Minimal change: 6%<br>IgA nephropathy: 5.8%<br>SLE: 19%<br>Infection related: 15%<br>Vascular causes: 9%<br>Hereditary: 6%<br>Undetermined: 3.5%                                                      |
| Niang A <sup>64</sup>    | 2014, Senegal, West       | 62   | Age (years): 47 ± 13<br>Male gender: 55%                                                 | no  | Nephrosclerosis: 40.3%<br>Ch.GN: 21%<br>DN: 19.4%<br>PKD: 3.2%<br>Tub.int: 1.6%<br>Undetermined: 14.5%                                                                                                                                                                                                                                          |
| Buargub M <sup>65</sup>  | 2008, Libya, North        | 124  | Age (years): 47.4±15<br>Male gender: 62%                                                 | no  | DN: 27.4%<br>H.scl: 10.5%<br>Ch.GN: 8%<br>Nephrolithiasis: 7.3%<br>Amyloidosis: 6.8%<br>Chronic interstitial nephritis: 6.4%<br>PKD: 4%<br>Ischemic : 3.2%<br>SLE: 0.8%<br>Familial: 0.8%<br>Undetermined: 30.6%                                                                                                                                |
| Chijioke A <sup>66</sup> | 2010, Nigeria, West       | 436  | Age (years): 47.4 ± 16.2<br>Male gender: 57%                                             | no  | PKD: 15.4%                                                                                                                                                                                                                                                                                                                                      |
| Elsharif M <sup>67</sup> | 2011, Sudan, East         | 224  | Age (years): 45.78± 17.16<br>Male gender: 67.8%                                          | yes | H.sclerosis: 14.29%<br>Obstructive uropathy: 11.61%<br>Ch.GN: 9.8%<br>DN: 8.04%<br>Anaglesic nephropathy: 1.34%<br>Renovascular: 0.45%<br>PKD: 0.9%<br>Undetermined: 53.57%                                                                                                                                                                     |
| Elkhatib M <sup>68</sup> | 2012, Egypt, North        | 437  | Age (years): 89% <50 years.<br>8.5% 50–60 years and 3% ><br>50 years<br>Male gender: 52% | yes | SLE: 24.7%<br>MGN: 10.9%<br>FSGS: 6.8%<br>Mesangiocapillary GN: 6.7%<br>Acute interstitial nephritis: 6.25%<br>Membranous nephropathy: 5.4%<br>Crescentic GN: 5.4%<br>Chronic interstitial nephritis: 4.5%<br>Minimal change disease: 3.8%<br>focal proliferative GN: 3.6%<br>Amyloidosis: 2.7%<br>Nephrosclerosis: 1.13%<br>Undetermined: 3.6% |



|                             |                        |     |                                                                                  |     |                                                                                                                                                                                                      |
|-----------------------------|------------------------|-----|----------------------------------------------------------------------------------|-----|------------------------------------------------------------------------------------------------------------------------------------------------------------------------------------------------------|
| Ibrahim S <sup>69</sup>     | 2012, Egypt, North     | 924 | Age (years): 26.5 ± 14.6 years<br>Male gender: 47%                               | yes | FSGS: 28.57%<br>mesangioproliferative GN: 20.02%<br>MGN : 14%<br>Minimal change disease: 8.55%<br>Amyloidosis: 5.52%<br>Diffuse proliferative GN: 5.20%<br>Focal proliferative GN: 3.68%<br>DN:0.22% |
| Ayach G <sup>70</sup>       | 2011, Morocco, North   | 386 | Age (years): 19 (IQR:12-25)<br>Male gender: 61%                                  | yes | MGN :79.20%<br>FSGS: 9.10%<br>Extramembranous glomerulonephritis:9.10%<br>Renal amyloidosis: 2.6%.                                                                                                   |
| Ramilitiana B <sup>71</sup> | 2016, Madagascar, East | 239 | Age (years): 45.5( range: 16-82)<br>Male gender: 40%<br>Diabetes mellitus: 12.6% | No  | Ch.GN: 40.1%<br>H.Scl: 35.6%<br>DN:12.6%<br>Tub.int: 10.46%                                                                                                                                          |
| Zajjari Y <sup>72</sup>     | 2012, Morocco, North   | 16  | Age (years): 60 (47-79)<br>Male gender: 81.3%<br>Hypertension: 56.3%             | Yes | DN: 25%                                                                                                                                                                                              |

Tub. Int: tubulo-interstitial, DN: diabetic nephropathy, H. Scl: hypertensive sclerosis, Ch. GN: chronic glomerulonephritis, PKD: polycystic kidney disease, DM: diabetes mellitus, SLE: sytemic lupus erthmatosus , FSGS: focal segemental glomerulosclerosis, MGN: membronus gloemrulonephritis



# PRISMA 2009 Checklist

| Section/topic                      | #  | Checklist item                                                                                                                                                                                                                                                                                              | Reported on page #       |
|------------------------------------|----|-------------------------------------------------------------------------------------------------------------------------------------------------------------------------------------------------------------------------------------------------------------------------------------------------------------|--------------------------|
| <b>TITLE</b>                       |    |                                                                                                                                                                                                                                                                                                             |                          |
| Title                              | 1  | Identify the report as a systematic review, meta-analysis, or both.                                                                                                                                                                                                                                         | 1                        |
| <b>ABSTRACT</b>                    |    |                                                                                                                                                                                                                                                                                                             |                          |
| Structured summary                 | 2  | Provide a structured summary including, as applicable: background; objectives; data sources; study eligibility criteria, participants, and interventions; study appraisal and synthesis methods; results; limitations; conclusions and implications of key findings; systematic review registration number. | 2                        |
| <b>INTRODUCTION</b>                |    |                                                                                                                                                                                                                                                                                                             |                          |
| Rationale                          | 3  | Describe the rationale for the review in the context of what is already known.                                                                                                                                                                                                                              | 3,4                      |
| Objectives                         | 4  | Provide an explicit statement of questions being addressed with reference to participants, interventions, comparisons, outcomes, and study design (PICOS).                                                                                                                                                  | 4                        |
| <b>METHODS</b>                     |    |                                                                                                                                                                                                                                                                                                             |                          |
| Protocol and registration          | 5  | Indicate if a review protocol exists, if and where it can be accessed (e.g., Web address), and, if available, provide registration information including registration number.                                                                                                                               | N/A                      |
| Eligibility criteria               | 6  | Specify study characteristics (e.g., PICOS, length of follow-up) and report characteristics (e.g., years considered, language, publication status) used as criteria for eligibility, giving rationale.                                                                                                      | 4,5                      |
| Information sources                | 7  | Describe all information sources (e.g., databases with dates of coverage, contact with study authors to identify additional studies) in the search and date last searched.                                                                                                                                  | 4,5                      |
| Search                             | 8  | Present full electronic search strategy for at least one database, including any limits used, such that it could be repeated.                                                                                                                                                                               | 4, supplementary table 1 |
| Study selection                    | 9  | State the process for selecting studies (i.e., screening, eligibility, included in systematic review, and, if applicable, included in the meta-analysis).                                                                                                                                                   | 4,5                      |
| Data collection process            | 10 | Describe method of data extraction from reports (e.g., piloted forms, independently, in duplicate) and any processes for obtaining and confirming data from investigators.                                                                                                                                  | 4,5                      |
| Data items                         | 11 | List and define all variables for which data were sought (e.g., PICOS, funding sources) and any assumptions and simplifications made.                                                                                                                                                                       | 4,5                      |
| Risk of bias in individual studies | 12 | Describe methods used for assessing risk of bias of individual studies (including specification of whether this was done at the study or outcome level), and how this information is to be used in any data synthesis.                                                                                      | 5,6                      |
| Summary measures                   | 13 | State the principal summary measures (e.g., risk ratio, difference in means).                                                                                                                                                                                                                               | 6                        |

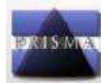

# PRISMA 2009 Checklist

|                      |    |                                                                                                                                                           |   |
|----------------------|----|-----------------------------------------------------------------------------------------------------------------------------------------------------------|---|
| Synthesis of results | 14 | Describe the methods of handling data and combining results of studies, if done, including measures of consistency (e.g., $I^2$ ) for each meta-analysis. | 6 |
|----------------------|----|-----------------------------------------------------------------------------------------------------------------------------------------------------------|---|

Page 1 of 2

| Section/topic                 | #  | Checklist item                                                                                                                                                                                                                                                                                             | Reported on page #                          |
|-------------------------------|----|------------------------------------------------------------------------------------------------------------------------------------------------------------------------------------------------------------------------------------------------------------------------------------------------------------|---------------------------------------------|
| Risk of bias across studies   | 15 | Specify any assessment of risk of bias that may affect the cumulative evidence (e.g., publication bias, selective reporting within studies).                                                                                                                                                               | 6                                           |
| Additional analyses           | 16 | Describe methods of additional analyses (e.g., sensitivity or subgroup analyses, meta-regression), if done, indicating which were pre-specified.                                                                                                                                                           | 6                                           |
| <b>RESULTS</b>                |    |                                                                                                                                                                                                                                                                                                            |                                             |
| Study selection               | 17 | Give numbers of studies screened, assessed for eligibility, and included in the review, with reasons for exclusions at each stage, ideally with a flow diagram.                                                                                                                                            | 6,7,17, Fig.1                               |
| Study characteristics         | 18 | For each study, present characteristics for which data were extracted (e.g., study size, PICOS, follow-up period) and provide the citations.                                                                                                                                                               | Tables( 2-4, supplementary table 2) P:19-51 |
| Risk of bias within studies   | 19 | Present data on risk of bias of each study and, if available, any outcome level assessment (see item 12).                                                                                                                                                                                                  | Tables( 2-4, supplementary table 2) P:19-51 |
| Results of individual studies | 20 | For all outcomes considered (benefits or harms), present, for each study: (a) simple summary data for each intervention group (b) effect estimates and confidence intervals, ideally with a forest plot.                                                                                                   | 6-11, 18-51                                 |
| Synthesis of results          | 21 | Present results of each meta-analysis done, including confidence intervals and measures of consistency.                                                                                                                                                                                                    | N/A                                         |
| Risk of bias across studies   | 22 | Present results of any assessment of risk of bias across studies (see Item 15).                                                                                                                                                                                                                            | Tables 2,3 and 4, P: 19-51                  |
| Additional analysis           | 23 | Give results of additional analyses, if done (e.g., sensitivity or subgroup analyses, meta-regression [see Item 16]).                                                                                                                                                                                      | N/A                                         |
| <b>DISCUSSION</b>             |    |                                                                                                                                                                                                                                                                                                            |                                             |
| Summary of evidence           | 24 | Summarize the main findings including the strength of evidence for each main outcome; consider their relevance to key groups (e.g., healthcare providers, users, and policy makers).                                                                                                                       | 11                                          |
| Limitations                   | 25 | Discuss limitations at study and outcome level (e.g., risk of bias), and at review-level (e.g., incomplete retrieval of identified research, reporting bias).<br>For peer review only, <a href="http://bmjopen.bmj.com/site/about/guidelines.xhtml">http://bmjopen.bmj.com/site/about/guidelines.xhtml</a> | 12,14, 15                                   |



# PRISMA 2009 Checklist

|                |    |                                                                                                                                            |    |
|----------------|----|--------------------------------------------------------------------------------------------------------------------------------------------|----|
| Conclusions    | 26 | Provide a general interpretation of the results in the context of other evidence, and implications for future research.                    | 16 |
| <b>FUNDING</b> |    |                                                                                                                                            |    |
| Funding        | 27 | Describe sources of funding for the systematic review and other support (e.g., supply of data); role of funders for the systematic review. | 54 |

From: Moher D, Liberati A, Tetzlaff J, Altman DG, The PRISMA Group (2009). Preferred Reporting Items for Systematic Reviews and Meta-Analyses: The PRISMA Statement. PLoS Med 6(7): e1000097. doi:10.1371/journal.pmed1000097

For more information, visit: [www.prisma-statement.org](http://www.prisma-statement.org).

Page 2 of 2

# BMJ Open

## CHRONIC KIDNEY DISEASE IN AFRICA: A SYSTEMATIC REVIEW

|                                 |                                                                                                                                                                                                                                                                                                                                                                                                                                                                                                                                                                                                            |
|---------------------------------|------------------------------------------------------------------------------------------------------------------------------------------------------------------------------------------------------------------------------------------------------------------------------------------------------------------------------------------------------------------------------------------------------------------------------------------------------------------------------------------------------------------------------------------------------------------------------------------------------------|
| Journal:                        | <i>BMJ Open</i>                                                                                                                                                                                                                                                                                                                                                                                                                                                                                                                                                                                            |
| Manuscript ID                   | bmjopen-2016-015069.R3                                                                                                                                                                                                                                                                                                                                                                                                                                                                                                                                                                                     |
| Article Type:                   | Research                                                                                                                                                                                                                                                                                                                                                                                                                                                                                                                                                                                                   |
| Date Submitted by the Author:   | 12-Jul-2017                                                                                                                                                                                                                                                                                                                                                                                                                                                                                                                                                                                                |
| Complete List of Authors:       | Abd ElHafeez, Samar; Alexandria University High Institute of Public Health, Epidemiology<br>Bologna, Davide; CNR-IFC, Clinical Epidemiology of Renal Diseases and Hypertension, Reggio Cal Unit<br>D'Arrigo, Graziella; CNR-IFC, Clinical Epidemiology of Renal Diseases and Hypertension, Reggio Cal Unit<br>Dounousi, Evangelia; University of Ioannina School of Medicine, Nephrology<br>Tripepi, Giovanni; CNR-IFC, Clinical Epidemiology of Renal Diseases and Hypertension, Reggio Cal Unit<br>Zoccali, Carmine; CNR-IFC, Clinical Epidemiology of Renal Diseases and Hypertension, Reggio Cal Unit; |
| <b>Primary Subject Heading</b>: | Epidemiology                                                                                                                                                                                                                                                                                                                                                                                                                                                                                                                                                                                               |
| Secondary Subject Heading:      | Renal medicine, Research methods                                                                                                                                                                                                                                                                                                                                                                                                                                                                                                                                                                           |
| Keywords:                       | CKD, Africa, Systematic review                                                                                                                                                                                                                                                                                                                                                                                                                                                                                                                                                                             |
|                                 |                                                                                                                                                                                                                                                                                                                                                                                                                                                                                                                                                                                                            |

SCHOLARONE™  
Manuscripts

only

1  
2  
3 1 **TITLE PAGE**

4 2  
5 3 **CHRONIC KIDNEY DISEASE IN AFRICA: A SYSTEMATIC REVIEW**

6 4  
7 5  
8 6 *Samar Abd ElHafeez<sup>1</sup> Dr.PH, Davide Bolignano<sup>2</sup> MD; Graziella D'Arrigo<sup>2</sup>, Ph.D; Evangelia Dounousi<sup>3</sup>,Ph.D;*  
9 7 *Giovanni Tripepi<sup>2</sup>, Ph.D; Carmine Zoccali<sup>2</sup>, FASN, FNKF, FERA*

10 8 <sup>1</sup>*High Institute of Public Health - Alexandria University, Epidemiology, Alexandria, EGYPT*

11 9 <sup>2</sup>*CNR/IFC, Clin. Epid. and Physiopath. of Renal Dis. and Hypert., Reggio Calabria, ITALY*

12 10 <sup>3</sup>*Department of Nephrology, School of Health Sciences - University of Ioannina, Ioannina, GREECE*

13 11  
14 12 Correspondence:

15 13 Prof. Carmine Zoccali

16 14 CNR Clinical Epidemiology and Physiopathology of Renal Diseases and Hypertension of Reggio  
17 15 Calabria, c/o Nefrologia e CNR Ospedali Riuniti 89124 Reggio Cal, ITALY

18 16 Email: carmine.zoccali@tin.it

19 17 FAX 0039.0965.26879

20 18 **Word count:**

21 19 **Abstract: 300**

22 20 **Body of the manuscript: 4871**

23 21 **Keywords:** CKD, Africa, systematic review

## ABSTRACT

**Objectives:** While increasing attention is being paid to the rising prevalence of chronic diseases in Africa, there is little focus on chronic kidney disease (CKD). This systematic review assesses the CKD burden among the general population and high-risk groups on the entire African continent

**Design, setting, and participants:** We searched the MEDLINE and PUBMED databases for articles published between January 1<sup>st</sup>, 1995 and April 7<sup>th</sup>, 2017 by sensitive search strategies focusing on CKD surveys at the community level and high risk groups. In total, 7918 references were evaluated, of which 7766 articles were excluded because they did not meet the inclusion criteria. Thus, 152 studies were included in the final analysis

**Outcome measurement:** The pooled prevalence rate of CKD was expressed as a point estimate and 95% CI. No meta-analysis was done. Data were presented for different population.

**Results:** In the community-level studies, based on available medium and high quality studies, the pooled prevalence of CKD in Africa was 10.1% (95% CI: 9.8%-10.5%). West/Central-West had the highest prevalence (16.5%), followed by Central (16%), Southern (12.2%), Eastern (11.0%), and North (4%) Africa. The prevalence in sub-Saharan Africa was 14.02%. The pooled prevalence of CKD in the high risk groups was 5.6% (95% CI: 5.4-5.8%) in HIV (based on available medium and high quality studies), 24.7% (95% CI: 23.6-25.7%) in diabetes (based on all available studies which are of low quality except four of medium quality) and 34.5% (95 % CI: 34.04%-36%) in hypertensive patients (based on all available studies which are of low quality except two of medium quality)

**Conclusion:** In Africa, CKD is a public health problem, mainly attributed to high risk conditions as hypertension and diabetes. The poor data quality restricts the validity of the findings and draws the attention to the importance of designing future robust studies

### Strengths and limitations of the study

- This systematic review assessed the CKD burden among the general population and high-risk groups on the entire African continent based on studies that covered all Africa from January 1<sup>st</sup>, 1995 till April 7<sup>th</sup>, 2017
- The quality of the included articles was assessed based on standard criteria dealing with clinical trials, diagnostic studies, and observational studies. The articles were assessed based on the population sampling and precision, sampling technique, response rate, and exclusion rate.
- No meta-analysis was conducted in this review due to the huge discrepancy in the definition used to identify CKD, the methods of creatinine measurement, urine protein assessment, and in the quality of the reporting.
- The review findings were limited by the low quality of the majority of studies in Africa
- The prevalence of CKD reported in this review should be interpreted with caution due to the bias introduced from the heterogeneity between studies, analytical and methodological issues, sample size, and study population selection

## 1 INTRODUCTION

2 Chronic kidney disease (CKD) is an emerging global public health problem<sup>1</sup>. The disease is a  
3 component of a new epidemic of chronic conditions that replaced malnutrition and infection as  
4 leading causes of mortality during the twentieth century<sup>2</sup>. Age-standardized death rates due to CKD  
5 have increased during the last 23 years. CKD has shifted from the 36<sup>th</sup> cause of death in 1990 to the  
6 19<sup>th</sup> cause in 2013<sup>3</sup>. The worldwide increase in CKD and kidney failure–necessitating renal  
7 replacement therapy (RRT) –and the high rate of cardiovascular mortality and morbidity  
8 attributable to CKD are poised to reach epidemic proportions over the next decade. CKD  
9 complications represent a considerable burden on global health care resources and only a small  
10 number of countries have sufficiently robust economies to meet the challenge posed by this disease.  
11 Socioeconomic differences in health exist and individuals of lower socioeconomic status (SES)  
12 have a higher risk for mortality and morbidity compared with those of higher SES<sup>4</sup>. A change in the  
13 global approach to CKD from the treatment of ESRD to intensive primary and secondary  
14 prevention is therefore considered an absolute public health priority<sup>5</sup>.

15 Africa is the second largest continent in the world, with a population of over 1 billion; 961.5  
16 million people live in sub-Saharan Africa and 195 million in Northern Africa<sup>6</sup>. Africa now faces the  
17 dual challenge of infectious illnesses and chronic diseases. Africa's chronic disease burden is  
18 secondary to various factors, including increased life expectancy, changing lifestyle practices,  
19 poverty, urbanization and globalization<sup>7</sup>. The World Health Assembly advocated the Global Action  
20 Plan for the Prevention and Control of non-communicable diseases 2013–2020. One of its targets is  
21 to reduce premature mortality from chronic diseases by 25% in 2025. These actions have the  
22 potential to make a significant impact on the burden of CKD<sup>8</sup>. Unfortunately, CKD problem  
23 remains underestimated on the entire continent due to lack of epidemiological information from  
24 different African countries. There exists only a single systematic review conducted in sub-Saharan  
25 Africa which concluded that CKD is a prevalent and potentially escalating disease across Sub-



1 Saharan Africa, with both communicable and non-communicable risk factors<sup>9</sup>. Strategies aimed at  
2 managing CKD epidemics in Africa critically depend on a reliable assessment of the burden of the  
3 problem and the establishment of affordable early detection programs. Previous studies reported the  
4 prevalence of CKD among the general population or the specific prevalence of this condition in  
5 diseases that are recognized as drivers of renal damage (e.g., diabetes mellitus). These estimates  
6 have varied across studies due to differences in the methods of Glomerular Filtration Rate (GFR)  
7 measurement, background risk (general population vs. high risk groups), or demographic  
8 characteristics (e.g., age, gender)<sup>10</sup>.

9 With this background in mind, this review aimed to increase the systematic information on the  
10 burden of CKD in the general population and high risk groups of the entire African continent and  
11 provide an estimate of the prevalence of CKD in different regions of Africa.

## 12 **MATERIALS AND METHODS**

### 13 **Data source and search strategy**

14 We followed the Preferred Reporting Items for Systematic Reviews and Meta-Analyses (PRISMA)  
15 Guidelines<sup>11</sup>. A systematic literature search was performed in the PubMed and OVID-MEDLINE  
16 databases by two authors (DB and SA) to identify articles reporting epidemiology data on CKD in  
17 the adult population in any geographic area of the African continent. This employed focused, highly  
18 sensitive search strategies (S1 Table). The search covered the time frame from January 1<sup>st</sup>, 1995 to  
19 April 7th, 2017. Papers without language and study design restrictions were located and screened.  
20 References from relevant studies were screened for supplementary articles.

### 21 **Study selection and data extraction**

22 Titles and abstracts were screened independently by two authors (SA and GD), who discarded  
23 studies that were not relevant to the topic. Case reports, reviews, editorials, letters, and studies  
24 focusing on African-Americans not living on the African continent, conducted entirely among  
25 children, or dealing with acute kidney injury or kidney transplantation were excluded. Two authors

1 (SA, ED) independently assessed the retrieved abstracts and the full texts of these studies to  
2 determine eligibility according to the inclusion criteria. Disagreements were resolved through  
3 discussion and consensus, or through consultation with a third reviewer (DB), who solved these  
4 differences based on study judgments. Furthermore, screening of reference lists of all of the  
5 retrieved studies was conducted to check for relevant articles, and a supplementary scan of the  
6 reference lists of the systematic reviews was performed to identify any additional studies. Data were  
7 extracted from full-text articles and registered using a specifically designed form. These data  
8 included study design, geographical area, sample size, the definition of CKD used, prevalence of  
9 CKD, age, gender, GFR measurement, type of creatinine assay, proteinuria, the method of outcome  
10 assessment and associated comorbidities such as diabetes mellitus and hypertension. Data extraction  
11 was performed by one reviewer (SA) and independently verified by another reviewer (DB).

## 12 **Data extraction and analysis**

13 Studies were categorized according to the reference population as follows: 1) studies dealing  
14 with the general population and 2) studies focusing on particular diseases such as diabetes,  
15 hypertension, lupus and HIV or settings, e.g., hospital- based surveys and occupational studies.

16 Information on the assessment of kidney function was collected, including: the equation  
17 adopted for GFR estimation ((Cockcroft-Gault(CG), Modification of Diet in Renal Disease  
18 (MDRD), Chronic Kidney Disease-Epidemiology Collaboration (CKD-EPI)), the type of creatinine  
19 assay (Jaffe, standardized or unknown), and the type of proteinuria or albuminuria assay used  
20 (semi-quantitative assessment by urinary strips or quantitative in urine samples or 24 h collection).  
21 When the study included two or three GFR equations, we defined the CKD prevalence based on the  
22 CKD-EPI equation whenever this information was provided. Otherwise, we considered the MDRD  
23 equation and lastly the CG equation. In the case of ethnicity correction<sup>12-14</sup>; we included the  
24 equation which corrected for ethnicity. Information on the definition of CKD used in each study  
25 was also included ((either the internationally accepted definition as Kidney Disease Outcome  
26 Quality Initiative (KDOQI), or other ways of defining CKD)).

## Quality assessment

Two independent authors (SA and DB) appraised each article independently and assessed its quality based on standard criteria described into details in previous methodology reviews dealing with clinical trials<sup>15</sup>, diagnostic studies<sup>16</sup>, and observational studies<sup>17</sup>. The articles were assessed based on the subject sampling and precision, sampling technique, response rate, method of assessment of kidney function, and exclusion rate

## Statistical analyses

The principal demographic and clinical data for each study were summarized as the mean and standard deviation or as absolute number and percentage, as appropriate. The age range in each study was also recorded. The pooled prevalence rate of CKD was expressed as a point estimate and 95% CI. The prevalence from each study was weighed by the sample size then the pooled prevalence was categorized by the African region. The inter-rater agreement for inclusion and quality assessment was determined using Cohen's kappa ( $\kappa$ ) coefficient<sup>18</sup>. The percentage of the different causes of CKD was weighed by the sample size of each study done among CKD patients. Then we simply summed the number of patients for each etiological factor and divided it by the total sample size from the whole included studies. No meta-analysis was conducted in this study. Data were appropriately presented for different populations (general population and CKD patients). The patients' data were stratified by the type of underlying condition, i.e., hypertension, diabetes mellitus, HIV, or systemic lupus erythematosus. All calculations were conducted using SPSS for Windows, version 21, Chicago, Illinois, USA.

## RESULTS

### Search results

The flow diagram of the selection process is depicted in (Fig. 1). In total, 7897 potentially relevant references were initially retrieved. Twenty-one additional citations were found through a personal

1 search. By screening titles and abstracts, a total 7534 citations were excluded because of search  
2 overlap, dealing with the wrong population (African American, AKI, cancer or post-transplant  
3 patients), or not providing actual data on CKD. Review articles, case reports, editorials, or letters  
4 were also excluded. Amongst the 384 studies selected for full text examination, 232 were excluded  
5 because they dealt with a population different from that specifically targeted in this systematic  
6 review, such as paediatric populations (122 studies), transplant patients (n=44), or others (n=46)  
7 (e.g., Africans living in non-African countries), or because only narrative data were provided  
8 (n=20). A total 152 articles were therefore reviewed in detail and included in the analysis. The main  
9 characteristics of these studies are summarized in Table 1. The inter-rater agreement for inclusion  
10 was  $\kappa=0.90$  and for the quality assessment was  $\kappa=0.85$ .

## 11 Study characteristics

12 Amongst the 152 studies reviewed, 29 were general population studies (Table 2). One-  
13 hundred twenty-three studies focused on selected groups, of which 42 included HIV patients (Table  
14 3), 18 studied diabetic patients (Table 4), nine included hypertensive subjects (Table 5) and twelve  
15 were conducted in other populations (Table 6), including one study in lupus patients<sup>19</sup>, one study in  
16 rheumatoid arthritis patients<sup>20</sup>, one study among sickle cell anemia patients<sup>21</sup>, two in specific  
17 occupational settings (silica exposure<sup>22</sup> and exposure to the nephrotoxic hair-dye,  
18 paraphenylenediamine<sup>23</sup>) and seven studies in family practice<sup>24-26</sup> or hospital-based<sup>27-30</sup> surveys.  
19 Forty-two studies conducted among CKD patients (S2 Table)<sup>31-72</sup>.

20 The studies that were included covered all regions of Africa. The highest number of the studies  
21 came from the Western macro-area (n=54), followed by the Eastern macro-area (n=32), Southern  
22 macro-area (n=25). Twenty studies were retrieved from the Northern Africa, eight studies from  
23 each of the Central macro-area and the Central-Western macro- area. Three studies were conducted  
24 in both the Eastern and Southern regions and two studies in the Sub-Saharan region.

## 1 Assessment of kidney function impairment

2 Urinary markers for kidney disease were assessed in seventy-eight (71%) among one-  
3 hundred ten studies conducted in the general population, high risk groups, occupational or hospital-  
4 based studies. Proteinuria was assessed by a semi-quantitative method (urinary strips) in twenty-  
5 eight studies<sup>21, 24, 26, 29, 73-96</sup>. Twenty studies used dipstick with confirmation by quantitative  
6 methods, nine of which used dipsticks to identify proteinuria/albuminuria with confirmation by 24-  
7 hour proteinuria<sup>25, 97-104</sup> whereas eleven studies used dipstick with confirmation by the protein-to-  
8 creatinine ratio or albumin-to-creatinine ratio<sup>105-115</sup>. Quantitative methods for the assessment of  
9 proteinuria/albuminuria (24-hour proteinuria or albuminuria, PCR, immunoassay, or ACR) were  
10 applied in twenty-nine studies<sup>19, 27, 28, 30, 116-140</sup>. In one study, the method of proteinuria assessment  
11 was not mentioned<sup>141</sup>.

12 Serum creatinine was measured in ninety-five studies (86%). The Jaffe assay was used in  
13 thirty studies<sup>29, 30, 76, 80, 82, 83, 86, 90, 95, 97, 102, 105, 111, 113, 124, 126, 130, 131, 136, 142-152</sup> whereas the IDMS-  
14 calibrated method was used in fifteen studies<sup>12, 14, 21, 26, 115, 117, 132-134, 141, 153-157</sup>. In nine studies, both  
15 the Jaffe assay and the calibrated serum creatinine were used<sup>13, 20, 25, 91, 98, 99, 106, 112, 158</sup>. In the  
16 remaining forty-one studies provided no information on the method of creatinine measurement<sup>19, 24,  
17 27, 28, 78, 79, 81, 84, 85, 87-89, 93, 94, 96, 100, 101, 104, 109, 114, 116, 118-122, 125, 127, 135, 137-139, 159-167</sup>. With respect to the  
18 formula used for estimating GFR, the MDRD equation was used in thirty studies<sup>24-26, 28, 29, 94-97, 105,  
19 106, 111, 113, 116, 117, 121, 122, 126, 130, 133, 134, 136, 141, 146, 149, 153, 154, 158, 159, 164</sup> and the CG equation was used in  
20 eighteen<sup>19, 76, 81, 86-88, 93, 100, 102, 114, 119, 124, 138, 143, 145, 150, 162, 167</sup>. The other fourteen studies used both  
21 the CG and the MDRD equations<sup>78-80, 83-85, 98, 99, 101, 144, 147, 152, 161, 163</sup>, whereas fifteen studies  
22 estimated GFR by the CG, MDRD, and the CKD-EPI methods<sup>12-14, 20, 82, 90, 91, 109, 112, 115, 139, 142, 155, 156,  
23 160</sup>. Six studies used MDRD and CKD-EPI<sup>131, 132, 137, 148, 151, 157</sup> and two studies used CKD-EPI<sup>21,  
24 166</sup>. In other two studies the formula was not mentioned<sup>30, 135</sup>.

## 1 Definition of CKD

2 Thirty-one studies defined the presence of CKD as an eGFR below 60 ml/min/1.73 m<sup>2</sup> <sup>12,14</sup>  
3 ,20,80,93-96,111,117,119,139,146,148-159,161-164,166,167, with chronicity confirmed by repeated testing in four  
4 other studies <sup>142-145</sup>. Moreover, twenty-eight studies reported CKD prevalence based on eGFR  
5 below 60 ml/min/1.73 m<sup>2</sup> and/or the presence of proteinuria or albuminuria <sup>21,24,26,76,78,82-84,86,91,99</sup>  
6 ,100,105,106,109,112-114,121,130-137,141. Proteinuria/albuminuria was used alone to identify CKD in  
7 fourteen studies <sup>73-75,77,87,92,107,108,110,123,128,129,138,140</sup>. KDOQI staging <sup>168</sup> of CKD was used in  
8 thirteen studies <sup>13,25,29,79,85,90,97,98,115,116,122,124,126</sup>. The serum creatinine level (either doubling, or  
9 an increase above a certain threshold) was considered to be a marker of the presence of CKD in four  
10 studies <sup>89,104,120,165</sup>. In sixteen studies, the definition of CKD was either not mentioned or was  
11 defined in various ways, including personal history, Creatinine Clearance (CrCl) ≤50 ml/min,  
12 clinical manifestations, the presence of albuminuria, elevated serum creatinine, and the average of  
13 two measurements of eGFR < 90 ml/min/1.73 m<sup>2</sup> <sup>2,19,27,28,30,81,88,101-103,118,125,127,147,160,169,170</sup>.

## 14 Paper quality

15 Paper quality was high in sixteen studies <sup>13,25,75,90,91,97,98,105,106,112,116,132-134,148,155</sup>. Thirty-five  
16 studies were of medium quality <sup>12,14,26,29,73,74,77-79,81,82,96,110,111,115,117,128,130,131,137,141,143-145,150-</sup>  
17 <sup>152,154,157,159-161,163,166,167</sup>. The rest of the studies were of low quality.

## 18 Prevalence of CKD

19 Based on the prevalence of eGFR <60 ml/min/1.73m<sup>2</sup> and/or the presence  
20 albuminuria/proteinuria (the current definition of CKD by KDOQI) <sup>168</sup> reported in the 24 medium-  
21 high quality studies in **Table 2** the pooled prevalence of CKD in the general population in Africa  
22 was 10.1% (95% CI: 9.8%-10.5%). The highest prevalence was reported in the West/Central-West  
23 (16.5%), followed by the Central region (16%), Southern (12.2%), Eastern (11.0%), and North (4%)  
24 Africa (Fig. 2). The pooled prevalence in Sub-Saharan Africa was 14.02% (95% CI: 13.5- 14.5 %).

25 Among HIV patients (**Table 3**), the pooled prevalence of CKD (estimated as above on the

1 basis of the KDOQI definition in the eighteen medium quality studies in the same table) was 5.6%  
2 (95% CI: 5.4-5.8%). Based on the treatment status, the prevalence of renal dysfunction was 9.9%  
3 (95 % CI: 9.4- 10.4%) among HIV patients not receiving treatment while the prevalence was 5.2%  
4 (95 % CI: 5.0-5.4%) among HIV patients on anti-retroviral therapy .The West/ Central-West  
5 recorded the highest prevalence of CKD among HIV patients (11.6%), followed by the East  
6 (11.2%) , and South (3.5%) macro-areas. The prevalence was reported to be 5.7% among the 3  
7 studies done in both the East and South macro- areas and 2.5% from the study done in the sub-  
8 Saharan area

9 Among diabetic patients (**Table 4**, all studies are of low quality except for four with medium  
10 quality), the pooled prevalence of CKD was 24.7% (95%CI: 23.6-25.7%). The highest prevalence  
11 was in the Eastern (46.9%), followed by the Central (40.8%), West/Central-West (27.7%), South  
12 (23.0%), and North (18.9%) Africa. One study was done in sub-Saharan reported that the  
13 prevalence was 13%

14 The pooled prevalence of CKD among hypertensive patients (**TABLE 5**, 9 studies; all of  
15 low quality except for two with medium quality) was 34.5% (95 % CI: 34.04%-36%). The highest  
16 prevalence was reported from one study in the East macro-area (39.5%) followed by the  
17 West/Central-West (37.7%), South (25.4%) Africa. No data were found for other African macro-  
18 areas.

19 Among other patient populations (studies reported in Table 6), almost three quarters of the  
20 lupus patients had CKD (prevalence=72.0%) based on low quality study <sup>19</sup>. Hospital-based surveys  
21 revealed that ( the calculation was based on **the total prevalence** reported from all studies including  
22 three of high-medium quality and 4 of low quality in the same table ) more than one third of  
23 patients attending either primary care centres or tertiary hospitals had CKD (pooled prevalence=  
24 36%, 95% CI: 34.4-37.7%). CKD was prevalent among almost 39% of rheumatoid arthritis <sup>20</sup>or  
25 sickle cell patients <sup>21</sup>. The study (low quality) conducted among hairdressers exposed to  
26 paraphenylenediamine<sup>104</sup> reported that 26.4% of these subjects had renal impairment. Of note,

100% of silica-exposed workers experienced proteinuria ( reported from low quality study)<sup>129</sup>.

The prevalence of CKD was variable based on definition used to diagnose CKD. Based on medium-high quality studies; CKD had a 6.2 % prevalence (95% CI: 6.0- 6.4%) in population studies defining this disease as an eGFR below 60 ml/min/1.73 m<sup>2</sup><sup>12,14,96,111,117,148,150-152,154,155,157,159,163,166,167</sup>. When CKD was diagnosed based on eGFR below 60 ml/min/1.73 m<sup>2</sup> and/or the presence of proteinuria or albuminuria<sup>26,78,82,91,105,106,112,114,130-134,141</sup>; the prevalence was 7.3 % (95 %CI: 6.9-7.7%). The prevalence of CKD was 22.5 % (95% CI: 21.5- 23.5%) in studies where the disease was defined on the basis of proteinuria<sup>73-75,77,110,128</sup>. When KDOQI definition (i.e. by combining the eGFR and proteinuria/albuminuria) was used<sup>13,25,29,79,90,97,98,115,116</sup>, the prevalence of CKD was 19.7% (95% CI: 18.7-20.8%)

## Causes of CKD

Forty-two studies were conducted specifically to clarify the underlying cause of CKD<sup>31-72</sup>. (S2 Table) The diagnosis was biopsy-proven in seventeen studies<sup>33,39,41,43-45,48,54,55,58,60,63,67-70,72</sup>. Vascular/hypertensive sclerosis was the main cause of CKD (16%) followed by diabetic nephropathy (15%), chronic glomerulonephritis (13%), tubulo-interstitial/obstructive (8%), primary glomerular diseases (6%), systemic lupus erythmatosus (3%), and polycystic kidney disease (3%). The causes of CKD were undetermined/miscellaneous causes in one fifth of the patients (20%). (Fig. 3)

## DISCUSSION

This systematic review focuses on the burden of CKD on the entire African continent. We assessed 152 papers published between January 1<sup>st</sup>, 1995 until April 7<sup>th</sup>, 2017, reporting the epidemiology of CKD in the general population and in specific chronic conditions in Africa. The CKD prevalence reported in our review should be interpreted with caution. Our estimates may be affected by the analytical heterogeneity used to measure creatinine and albuminuria. Serum creatinine concentrations are affected by intra-individual variability with over 20% changes within a 2-week



1  
2  
3 1 period<sup>171</sup> and most Jaffe assays overestimate serum creatinine<sup>172</sup>. The resulting bias could vary  
4  
5 2 according to the creatinine concentration, specific assay, manufacturer, and calibration material  
6  
7 3 used. Although the IDMS calibration standardization has reduced the bias and improved the Inter  
8  
9 4 laboratory comparability<sup>173</sup>, the number of studies reported using IDMS was low in Africa.  
10  
11 5 Moreover, CKD prevalence may additionally be influenced by albuminuria assays which are  
12  
13 6 affected by the inter laboratory differences<sup>174</sup>. The different equations used to estimate GFR could  
14  
15 7 be a source of bias. The systematic underestimation of measured GFR at higher estimated GFR by  
16  
17 8 the MDRD equation is well known, and may reflect higher creatinine generation in healthy  
18  
19 9 individuals compared with individuals with CKD in whom the MDRD equation was derived. This  
20  
21 10 bias is reduced substantially, but not completely, by the CKD-EPI equation, which was derived  
22  
23 11 from studies including people without CKD<sup>175</sup>. In addition, differences in sample size,  
24  
25 12 demographics, and clinical characteristics, are all significant limitations in this systematic review  
26  
27 13 for making accurate estimates of the prevalence of CKD in African countries. Furthermore, only  
28  
29 14 five studies<sup>79,142-145</sup> assessed the KDOQI chronicity criterion, which is a fundamental element  
30  
31 15 of the current definition of CKD by this organization. A single elevated serum creatinine, reduced  
32  
33 16 eGFR or an abnormal urinalysis should initially be viewed as a screening test, and a subject with  
34  
35 17 suspected CKD should be considered to have an azotaemia until CKD is determined by the  
36  
37 18 additional workup and clinical judgment<sup>176</sup>. Thus, estimates in this review should be seen as a  
38  
39 19 pragmatic attempt to evaluate the dimension of CKD as a public health issue on the African  
40  
41 20 continent.

42  
43 21 CKD is now considered to be an important component of the epidemic of non-communicable  
44  
45 22 diseases in economically developed and developing countries alike. In a seminal meta-analysis  
46  
47 23 published in 2014 Stanifer et al.,<sup>9</sup> for the first time drew attention to the public health  
48  
49 24 relevance of CKD in the sub-Saharan Africa, a vast area comprising 85% (947.4 million ) of  
50  
51 25 the whole African population<sup>9</sup>. In the present systematic review, the lowest prevalence of CKD  
52  
53 26 (4%) was reported in the Northern Africa macro-area; including Egypt, Libya, Tunisia, Algeria,  
54  
55  
56  
57  
58  
59  
60

1  
2  
3 1 Morocco, the Western Sahara, and Mauritania, and the highest (16.5%) was observed in West/  
4  
5 2 Central-West Africa, which includes Benin, Burkina Faso, the island nation of Cape Verde,  
6  
7 3 Gambia, Ghana, Guinea, Guinea-Bissau, Ivory Coast, Liberia, Mali, Mauritania, Niger, Nigeria,  
8  
9 4 Cameroon, the island of Saint Helena, Senegal, Sierra Leone, São Tomé and Príncipe and Togo.  
10  
11 5 The average prevalence in the entire African continent was 10.1%. The global CKD prevalence  
12  
13 6 was reported to be 13.4%<sup>177</sup>. In sub-Saharan Africa in Stanifer's meta-analysis, the prevalence of  
14  
15 7 CKD was 13.2%<sup>9</sup>, which is close to that reported in the same area in our review (14.02%). Among  
16  
17 8 the general population of economically developed countries, CKD has 13.6% prevalence in the  
18  
19 9 USA<sup>178</sup>. In Europe, the reported prevalence is lower and more homogenous, being 8.9% in the  
20  
21 10 Netherlands, 6.8% in Italy, 5.2% in Portugal, 4.7% in Spain, and 3.3% in Norway<sup>179</sup>. CKD  
22  
23 11 prevalence in some Asian countries was higher than the estimates in the USA and in Europe, being  
24  
25 12 17.5% in Thailand<sup>180</sup>, 15% in India<sup>181</sup>, 13% in Japan<sup>182</sup>, 11.9% in Taiwan<sup>183</sup>, and 9.9% in China<sup>184</sup>.  
26  
27 13 Overall, the estimated prevalence of CKD at the general population level in African countries  
28  
29 14 appears to be comparable and possibly even higher than that reported in other continents. This may  
30  
31 15 be at least in part due to the low quality data for the prevalence of CKD in Africa related to poor  
32  
33 16 sampling techniques, unreliable kidney function measurements, and the different definitions used.

34  
35  
36  
37  
38 17 In our review, the prevalence of CKD in surveys based on hospitals or primary care centres  
39  
40 18 (36 %) is close to that in Swiss primary care centres (36%)<sup>185</sup>.

41  
42  
43 19 Poverty-related factors such as infectious diseases secondary to poor sanitation, inadequate  
44  
45 20 supply of safe water, environmental pollutants and high concentrations of disease transmitting  
46  
47 21 vectors continue to play an important role in the development of CKD in low-income countries.  
48  
49 22 Although rates of diabetic nephropathy are rising, chronic glomerulonephritis and interstitial  
50  
51 23 nephritis are among the principal causes of CKD in many countries<sup>186</sup>.

52  
53  
54 24 In Africa, infectious diseases such as HIV, bilharziasis, malaria, hepatitis B and C represent  
55  
56 25 an almost unique cluster of risk factors responsible for CKD<sup>187</sup>. HIV/AIDS is pandemic in Africa,  
57  
58 26 with a prevalence ranging from 0.5% in Senegal<sup>188</sup> to 27.4% in Swaziland<sup>189</sup>. The global success in  
59  
60

1 bringing effective antiretroviral treatment (HAART) to HIV-infected patients in Africa has  
2 determined the emergence of chronic medical illnesses such as HIV-related CKD<sup>190</sup>. Up to 50% of  
3 kidney diseases in HIV-infected persons result from a wide array of non-HIV-associated  
4 nephropathy (HIVAN) pathologies, ranging from glomerulonephritis to diabetic nephropathy<sup>191</sup>.  
5 We found that 5.6% of HIV patients complained of renal dysfunction. This figure is lower than that  
6 reported in economically developed countries such as France, USA, China, Spain, and Brazil<sup>192-196</sup>.  
7 CKD was higher among HIV patients not receiving HAART compared to those on HAART.  
8 Variation in the proportion of HIV patients affected by CKD depends on the heterogeneity in the  
9 definition used to determine renal dysfunction, the proportion of the study population on HAART,  
10 diverse ethnicities, the associated comorbidities, and the nutritional status of the study population.  
11 HIV patients are more prone to nutritional deficiencies due to mal-absorption, impaired oral intake,  
12 and the wasting syndrome. Increased availability of HAART has led to some improvement of the  
13 nutritional status of patients. However, for certain individuals, undernutrition and weight loss  
14 persist despite therapy. Malnutrition exacerbates side effects, alters drug pharmacokinetics, and  
15 impinges on adherence thereby limiting the beneficial effects of the therapy<sup>197</sup>. Furthermore,  
16 differences in HIV clades or strains in African patients<sup>198</sup> and genetic factor<sup>199</sup> may influence the  
17 replication capacities within the isolated renal reservoir and thus lead to a diversity in clinical  
18 presentations<sup>80</sup>.

19       Regarding systemic autoimmune diseases such as lupus, a study conducted among lupus  
20 patients from Senegal showed that almost three quarters (71.0%) the patients with this disease had  
21 evidence of renal involvement<sup>19</sup>. This isolated figure is higher than that reported in other  
22 countries<sup>200-202</sup>. More than one third (39%) patients with rheumatoid arthritis had CKD<sup>20</sup> which is  
23 higher than that reported from Taiwan<sup>203</sup>.

24       Even though there are no sufficient data to precisely reconstruct historical trends, the profile  
25 of CKD causes has changed during the last decades. Interstitial nephritis and glomerulonephritis  
26 were the main causes of CKD in North Africa<sup>204</sup> and CKD was principally caused by chronic

1  
2  
3  
4  
5  
6  
7  
8  
9  
10  
11  
12  
13  
14  
15  
16  
17  
18  
19  
20  
21  
22  
23  
24  
25  
26  
27  
28  
29  
30  
31  
32  
33  
34  
35  
36  
37  
38  
39  
40  
41  
42  
43  
44  
45  
46  
47  
48  
49  
50  
51  
52  
53  
54  
55  
56  
57  
58  
59  
60

glomerulonephritis and hypertension in East and Tropical Africa<sup>205,206</sup>. Today, the spectrum of causes of CKD in Africa is dominated by diabetes mellitus and hypertension<sup>207</sup>. We found that the prevalence of vascular/hypertensive and diabetic nephropathies as a cause of CKD (16% and 15%, respectively) exceeded that caused by chronic glomerulonephritis (13%).

Our review has both strengths and limitations. The major strengths include a thorough systematic search of electronic databases and the inclusion of all comprehensive studies with a transparent assessment of CKD prevalence by two independent reviewers. The fact that our literature search was limited to PubMed and Medline OVID but did not include the African Index Medicus, like it was done by Stanifer in the meta-analysis of CKD in sub-Saharan Africa [8], is a limitation of our study. Because there was a huge discrepancy in the definitions used to identify CKD, the methods of creatinine measurement, urine protein assessment, and in the quality of the reporting, we decided to adopt an inclusive strategy. Our primary interest was to identify all studies conducted among different population groups in Africa providing information on CKD and to reconstruct a tentative scenario of the epidemiological dimension concerning disease in the entire African continent. Methodological limitations notwithstanding this review compiled estimates suggesting that the CKD burden in Africa is at least as concerning as that in economically-developed countries. The lack of a consistent definition of CKD makes it difficult to compare the burden of CKD across studies in various countries. Moreover, the failure to demonstrate chronicity when defining CKD is a common limitation of studies investigating CKD prevalence in Africa. It was reported that a single test in time has an extremely poor positive predictive value for confirmation of CKD compared to repeated testing 3 months later. Failure to repeat testing may lead to a significant overestimation of CKD prevalence and underestimation of the burden of CVD in CKD<sup>208</sup>. In addition, Observational studies are subject to bias and residual confounding which are difficult to account for and there are limitations due to the heterogeneity that arises from differences in age and sex distributions. These poor data quality reported in different studies is considered as a cumbersome problem limiting the accuracy in assessing the burden of CKD in Africa

1  
2  
3 1 In conclusion, CKD in Africa appears to be at least as common as in other continents and as  
4  
5 2 such, it constitutes a true public health priority with major cost burden to healthcare systems  
6  
7 3 worldwide. Targeted screening of high-risk groups (including those with hypertension, diabetes  
8  
9 4 mellitus, HIV patients and persons with occupational exposures) should likely be instituted as the  
10  
11 5 first step in kidney disease prevention whenever and wherever affordable and feasible. Education to  
12  
13 6 increase awareness of CKD among healthcare workers and patients, and the promotion of healthy  
14  
15 7 life styles, should be engrained in preventive programs. The treatment of hypertension and diabetes  
16  
17 8 mellitus are of obvious relevance. Nurses and other health workers should be trained to manage  
18  
19 9 these conditions at the local level if we are to curb the incidence of CKD and to avert the added  
20  
21 10 burden of CKD complications to diabetes, hypertension, and infectious diseases, the deadly trio of  
22  
23 11 risk factors underlying the CKD epidemic in Africa.  
24  
25  
26  
27  
28  
29  
30  
31  
32  
33  
34  
35  
36  
37  
38  
39  
40  
41  
42  
43  
44  
45  
46  
47  
48  
49  
50  
51  
52  
53  
54  
55  
56  
57  
58  
59  
60

1  
2  
3  
4  
5  
6  
7  
8  
9  
10  
11  
12  
13  
14  
15  
16  
17  
18  
19  
20  
21  
22  
23  
24  
25  
26  
27  
28  
29  
30  
31  
32  
33  
34  
35  
36  
37  
38  
39  
40  
41  
42  
43  
44  
45  
46  
47  
48  
49  
50  
51  
52  
53  
54  
55  
56  
57  
58  
59  
60**FUNDING STATEMENT:**

Samar Abd ElHafeez was granted an European Renal Association-European Dialysis and Transplantation Association (ERA-EDTA) fellowship at CNR-IFC/IBIM, Clinical Epidemiology and Physiopathology of Renal Disease and Hypertension of Reggio Calabria, Italy, and this work was completed during her training.

This article was written by in the framework of the Advisory Program of the ERA-EDTA YNP (Young Nephrologists' Platform) which is an official body of the ERA-EDTA (European Renal Association - European Dialysis and Transplant Association).

Dr. Samar Abd ElHafeez was an advisee of ERA-EDTA YNP Adviser-Advisee Program (Adviser Dr. Davide Bolignano)."

**COMPETING OF INTERESTS:** Not declared.

**AUTHORS' CONTRIBUTIONS:**

SA, DB, and CZ: conceptualized and designed the study.

SA, GD, and ED: participated in revising the articles included in the review and retrieved the necessary information.

DB and GT: supervised the data capture and analysis.

SA, DB, and GT: analysed and interpreted the data.

SA, DB, and CZ: drafted and critically revised the manuscript.

All of the authors read and approved the final manuscript.

**DATA SHARING STATEMENT:** No additional data are available.

**ACKNOWLEDGEMENTS**

We would like to thank the following professors and physicians for their help in providing the articles we evaluated in our review:

Prof. Olutayo Alebiosu, Prof.Ahmed Donia, Prof. Rashad Barsoum, Prof. Carel IJsselmuiden, Prof. Laurent Forcard, Prof. Anatole Laleye, Prof. Nestor Pakasa, Prof. Imaobong Etuk, Prof. Ifeoma Ulasi, Prof. Abubakr Abefe Sanusi, Prof. Gbenga Ayodele, Prof. Raida S. Yahya, Prof. Mohammed Benganem Gharbi, Prof. Fatma Ben Moussa, Dr.Ikechi Okpechi, Dr. Alaya Akram, Dr.Adebowale Ademola,Dr. Oluyombo Rotimi,, Dr.K S Nayak, Dr. Guy Neild, Dr.Rasheed Gbadegesin, Dr.Sidy Mohamed Seck, Dr. Amr El-Husseini Mohamed, Dr.Fasika M. Tedla, Prof. Adewale Akinsola, Prof. Olanrewaju Adedoyin, Dr.Halle Marie Patrice, Dr. Emmanuel Agaba, Prof. Miriam Adhikari, Dr. B.T Bello, Dr.Zidane Djelloul

**Table 1: Characteristics of the study population included in the analysis**

| Study population         | Number of the studies | Study characteristics                                                                                             |
|--------------------------|-----------------------|-------------------------------------------------------------------------------------------------------------------|
| General population       | 29                    | N=30169, age ranging from 12 to 95 years; 48% males                                                               |
| Diabetic patients        | 18                    | N=9082, age ranging from 14 to 90 years; 43% males                                                                |
| Hypertensive patients    | 9                     | N=4123, age ranging from 19 to 90 years; 43% males                                                                |
| HIV patients             | 42                    | N= 67432, age ranging from 13 to 74 years; 36% males                                                              |
| Occupational group       | 2                     | N= 153, age ranging from 22 to 59 years; one study only enrolled females and the other principally enrolled males |
| Family practice patients | 7                     | N= 3250, age ranging from 20-74 years, 44% males                                                                  |
| Lupus patients           | 1                     | N= 43, age ranging from 16 to 55 years, 7% males                                                                  |
| Rheumatoid arthritis     | 1                     | N=233, age ranging from 40-70 years, 17.2% males                                                                  |
| Sickle cell anemia       | 1                     | N=194, age ranging from 12-40 years, 43.3% males                                                                  |
| CKD patients             | 42                    | N= 34236, age ranging from 12 to 90 years, 58% males                                                              |

Table 2: Studies on CKD among the general population

| Study ID                    | Year, Country, Region   | Location                                                                 | N    | Population Characteristic                                                                                                                                                                                        | Definition of CKD                | Method of outcome assessment                                                                            | Type of creatinine assay      | Proteinuria                                   | CKD prevalence                                                                     | Quality assessment |
|-----------------------------|-------------------------|--------------------------------------------------------------------------|------|------------------------------------------------------------------------------------------------------------------------------------------------------------------------------------------------------------------|----------------------------------|---------------------------------------------------------------------------------------------------------|-------------------------------|-----------------------------------------------|------------------------------------------------------------------------------------|--------------------|
| Abdelsatir S <sup>169</sup> | 2013 Sudan North-east   | All village inhabitants                                                  | 389  | Age (years): 41 ± 15<br>Male gender: 16.2%<br>Hypertension: 39.6%,<br>DM: 17%<br>BMI category: ( kg/m <sup>2</sup> )<br><18: 6.2%,<br>18-24.9: 65.8%,<br>25-29.9: 20.2 %,<br>≥30: 7.8%                           | Not identified, personal history | Personal history                                                                                        | Not mentioned                 | Not measured                                  | <b>Total prevalence (as reported): 6.40%</b>                                       | Low                |
| Fatiu A <sup>73</sup>       | 2011 Nigeria West       | Market population                                                        | 286  | Age (years): 49.5 ± 5.7<br>Male gender: 9.8%<br>Hypertension: 37.7%<br>BMI (kg/m <sup>2</sup> ): 26.76 ± 5.28<br><20 kg/m <sup>2</sup> : 7.4%<br>20-25 kg/m <sup>2</sup> : 33.4%<br>> 25 kg/m <sup>2</sup> : 59% | Proteinuria ≥ +1                 | Midstream urine sample was tested by urinary strip                                                      | Not measured                  | <b>29.70%</b>                                 | <b>Total prevalence ( based on proteinuria prevalence): 29.7%</b>                  | Medium             |
| Traore M <sup>74</sup>      | 1998 Mali West          | All Household population of the villages                                 | 1098 | Age (years): 30±12<br>Male gender: 52%                                                                                                                                                                           | Proteinuria ≥ +1                 | Microhaematuria and proteinuria by urinary strip                                                        | Not measured                  | 40.80%                                        | <b>Total prevalence ( based on proteinuria prevalence): 40.80%</b>                 | Medium             |
| Matsha T <sup>12</sup>      | 2013 South Africa South | Bellville town inhabitants                                               | 1202 | Age (years): 52.9 ± 14.8<br>Male gender: 24.7%<br>SBP: 125±20<br>DBP: 76 ± 13<br>DM: 26.4%<br>BMI: 29.9 ± 7.2                                                                                                    | eGFR < 60 ml/min                 | 4 variables: MDRD, CG, CKD-EPI                                                                          | Standardized creatinine assay | Not measured                                  | <b>Prevalence of stages 3-5: 7.4% (based on CKD-EPI with ethnicity correction)</b> | Medium             |
| Seck SM <sup>97</sup>       | 2014 Senegal West       | Two stage cluster sampling of Urban and rural inhabitants of Saint-Louis | 1037 | Age (years): 48.0 ± 16.9<br>Male gender: 40%<br>Hypertension: 39.1%<br>DM: 12.7%<br>BMI: 26.3 ± 6.8 kg/m <sup>2</sup>                                                                                            | KDOQI                            | Albuminuria by urinary strips. Positive samples were confirmed by 24-hour albuminuria, eGFR by 186 MDRD | Kinetic Jaffe                 | 5.3% albuminuria >1 g/l                       | <b>Total prevalence: 6.1%</b>                                                      | High               |
| Pruijm M <sup>116</sup>     | 2008 Seychelles, East   | a random sex-stratified and age-stratified sample inhabitants            | 1255 | Age (years): range, 25-64<br>Male gender: 46%                                                                                                                                                                    | KDOQI                            | Quantitative microalbuminuria by ACR, eGFR using MDRD                                                   | Not mentioned                 | 11.4% microalbuminuria, 0.7% macroalbuminuria | <b>Total prevalence : 15.3%</b><br>Prevalence of stages 3-4 CKD 3.2%.              | High               |



|                           |                         |                                              |      |                                                                                                                                                                                                                                                                 |                                                                                               |                                                                                                            |  |                                                 |                                                                                                                                                                                                                                  |        |
|---------------------------|-------------------------|----------------------------------------------|------|-----------------------------------------------------------------------------------------------------------------------------------------------------------------------------------------------------------------------------------------------------------------|-----------------------------------------------------------------------------------------------|------------------------------------------------------------------------------------------------------------|--|-------------------------------------------------|----------------------------------------------------------------------------------------------------------------------------------------------------------------------------------------------------------------------------------|--------|
|                           |                         | of Seychelle                                 |      |                                                                                                                                                                                                                                                                 |                                                                                               |                                                                                                            |  |                                                 |                                                                                                                                                                                                                                  |        |
| Sumaili EK <sup>98</sup>  | 2009 Congo Central      | Multistage sampling of residents of Kinshasa | 500  | Age (years): 38.6 ± 14.4<br>Male gender: 41%<br>Hypertension: 27.6%<br>DM: 11.7%<br>BMI category:<br>25–29.9 kg/m <sup>2</sup> : 20.3%<br>≥30 kg/m <sup>2</sup> : 14.9%                                                                                         | KDOQI                                                                                         | Proteinuria by urinary strip and 24-hour proteinuria, eGFR by CG and 175MDRD                               |  | 18% proteinuria by dipstick<br>5% (≥300 mg/day) | <b>Total prevalence:</b><br>MDRD 12.4%<br>CG 19%<br><br><b>Prevalence by stage (MDRD)</b><br>Stage 1: 2%<br>Stage 2: 2.4%<br>Stage 3: 7.8%<br>Stage 4: 0.2%                                                                      | High   |
| Matsha T <sup>159</sup>   | 2014 South Africa South | All residents of Cape-Town                   | 320  | Age (years): mean, 56.4 (55.1–57.6, 95% CI)<br>Male gender: 22%<br>SBP: 124.7 (122.8–126.7, 95% CI)mmHg<br>DBP: 75.5 (74.2–76.7, 95% CI) mmHg<br>BMI: 31.9 (31.2–32.7, 95% CI) kg/m <sup>2</sup><br>Mean eGFR at baseline: 68.6±16.7 ml/min/1.73 m <sup>2</sup> | eGFR < 60 ml/min/ 1.73 m <sup>2</sup>                                                         | eGFR- 186MDRD (4 variables)                                                                                |  | Not measured                                    | <b>Total Prevalence 28.9% by categories</b><br>eGFR>90 ml/min/1.73m <sup>2</sup> :9.4%<br>eGFR60-90 ml/min/1.73m <sup>2</sup> : 58.7%<br>eGFR30-60 ml/min/1.73m <sup>2</sup> : 28.1%<br>eGFR<30 ml/min/1.73m <sup>2</sup> : 0.9% | Medium |
| Sumaili EK <sup>75</sup>  | 2008 Congo Central      | All Residents of Kinshasa                    | 3018 | Age (years): 44.3 ±15.3<br>Male gender: 59%<br>Hypertension: 18%<br>DM: 4%                                                                                                                                                                                      | Proteinuria ≥ +1                                                                              | Proteinuria by urinary strip                                                                               |  | 17.1%                                           | <b>Total prevalence ( based on proteinuria prevalence): 17.1%</b>                                                                                                                                                                | High   |
| Egbi OG <sup>76</sup>     | 2014 Nigeria West       | All Civil servants in Bayelsa                | 179  | Age (years): 45.2 ± 10.3<br>Male gender: 53.1%<br>SBP:128.5± 17.5 mmHg<br>DBP: 81.8 ±13.2 mmHg                                                                                                                                                                  | eGFR <60 ml/min/1.73 m <sup>2</sup> and/or presence of proteinuria of at least +1 on dipstick | Proteinuria by urinary strip, eGFR by CG equation standardized for body surface area (BSA)                 |  | 5.6%                                            | <b>Total prevalence: 7.8%</b><br><br><b>Prevalence by stage</b><br>Stage 1:3.4%<br>Stage 2: 2.2%<br>Stage 3: 2.2%<br>None in stage 4 or 5                                                                                        | Low    |
| Oluyombo R <sup>105</sup> | 2013 Nigeria West       | Multistage sampling of Households of Ilie    | 454  | Age (years): 45.8 ± 19.0<br>Male gender: 43%<br>Hypertension: 20.4%<br>DM: 0.6%                                                                                                                                                                                 | eGFR <60 ml/min and/or macroalbuminuria (ACR>300 mg/g or dipstick proteinuria)                | Proteinuria by urinary strip, negative cases were estimated for albumin creatinine ratio, eGFR by 186 MDRD |  | Macroalbuminuria in 8.9%                        | <b>Total prevalence: 18.8%</b><br><br><b>Prevalence by stage</b><br>Stage 1: 2.4%<br>Stage 2: 4.1%<br>Stage 3: 11.8%<br>Stage 4: 0.5%                                                                                            | High   |
| Eastwood J <sup>13</sup>  | 2010 Ghana, West        | Inhabitants of 12 villages                   | 944  | Age (years): 54.7±11.2<br>Male gender: 38%<br>SBP:125.5±26.0 mmHg                                                                                                                                                                                               | KDOQI                                                                                         | 175MDRD, CG, CKD-EPI                                                                                       |  |                                                 | <b>Total Prevalence ( based on CKD-EPI and ethnicity correction) :</b>                                                                                                                                                           | High   |

|                              |                          |                                                                                                                               |       |                                                                                                                                 |                                                                                                                                                                                                        |                                                                        |                           |                                             |                                                                                                                                                         |        |
|------------------------------|--------------------------|-------------------------------------------------------------------------------------------------------------------------------|-------|---------------------------------------------------------------------------------------------------------------------------------|--------------------------------------------------------------------------------------------------------------------------------------------------------------------------------------------------------|------------------------------------------------------------------------|---------------------------|---------------------------------------------|---------------------------------------------------------------------------------------------------------------------------------------------------------|--------|
|                              |                          |                                                                                                                               |       | DBP: 74.4 ± 13.6 mmHg<br>DM: 4%<br>BMI: 21.1 ± 4.2 kg/m <sup>2</sup>                                                            |                                                                                                                                                                                                        |                                                                        |                           |                                             | 1.7%<br>MDRD: 1.6% (7.2 %<br>without ethnicity<br>correction;<br>CKD-EPI 1.7% (4.7%<br>without ethnicity<br>correction),<br>CG 21.0%.                   |        |
| Gouda Z <sup>117</sup>       | 2011<br>Egypt<br>North   | Community<br>based in<br>Al-<br>Buhayrah<br>governorate                                                                       | 417   | Age (years): 39.12 ±<br>14.29<br>Male gender: 43.2%<br>Hypertension: 25.20%<br>DM: 10.6%<br>BMI: 29.96 ± 6.18 kg/m <sup>2</sup> | eGFR <60 ml/min/1.73 m <sup>2</sup>                                                                                                                                                                    | Quantitative assessment of urinary<br>ACR, eGFR by 175 MDRD            | IDMS-calibrated           | 10.6%<br>microalbuminuria                   | <b>Total prevalence 18%</b>                                                                                                                             | Medium |
| Ayodele<br>OE <sup>77</sup>  | 2011<br>Nigeria<br>West  | People at a<br>major trade<br>center, the<br>public<br>servant<br>secretariat<br>and the<br>state<br>broadcastin<br>g station | 586   | Age (years): 42.4±11.2<br>Male gender: 61.4 %<br>Hypertension: 16.4%<br>DM: 3.8%<br>BMI: 25.9±5.4 kg/m <sup>2</sup>             | proteinuria ≥+1                                                                                                                                                                                        | Proteinuria by urinary strip                                           | Not assessed              | 2.50%                                       | <b>Total prevalence ( based<br/>on proteinuria ): 2.50%</b>                                                                                             | Medium |
| Abu-Aisha<br>H <sup>78</sup> | 2009<br>Sudan<br>East    | Pilot survey<br>of police<br>housing<br>complex                                                                               | 273   | Age (years): 34.3±12<br>Male gender: 49.1%<br>Hypertension: 27%<br>DM: 5.1%                                                     | eGFR <60 ml/min/1.73 m <sup>2</sup><br>and or proteinuria                                                                                                                                              | Proteinuria by urinary strip,<br>175MDRD, CG                           | Not mentioned             | 5.30%                                       | <b>Total prevalence<br/>(MDRD) 7.7%</b><br>[11% by CG]<br><b>Prevalence by stage</b><br>Stage 1 or 2: 4.7%<br>Stage 3:2.6%<br>Stage 4: 0<br>Stage: 0.4% | Medium |
| Gharbi<br>M <sup>106</sup>   | 2012<br>Morocco<br>North | Stratified<br>random<br>sampling of<br>population<br>in two<br>towns                                                          | 10524 | Age (years): range, 25-<br>70<br>Male gender: (50%),<br>Hypertension : 16.7%                                                    | eGFR < 60 ml/ min/1.73<br>m <sup>2</sup> or macroalbuminuria or<br>dipstick abnormalities<br>(proteinuria<br>≥ ++ 1 or haematuria: ≥<br>++1) or diabetes type 1<br>associated with<br>microalbuminuria | 175 MDRD, microalbuminuria and<br>proteinuria by urinary strip and ACR | Kinetic Jaffe and<br>IDMS | microalbuminuria<br>(30-299 mg/l):<br>5.26% | <b>Total prevalence 2.90%</b>                                                                                                                           | High   |
| CU O <sup>153</sup>          | 2014<br>Nigeria<br>West  | All<br>attendees to<br>lectures of<br>the<br>Ebreime<br>Foundation<br>for the<br>elderly,                                     | 170   | Age (years): 68.1±7.7<br>Male gender: 67.1%                                                                                     | eGFR<60ml/min/1.73 m <sup>2</sup>                                                                                                                                                                      | 175 MDRD                                                               | IDMS calibrated           |                                             | <b>Total prevalence:<br/>43.50%,</b><br>(all cases were at stage<br>3)                                                                                  | Low    |

|                             |                            |                                                                                      |      |                                                                                                                                                                                     |                                                                                              |                                                               |                        |                       |                                                                                                                                               |        |
|-----------------------------|----------------------------|--------------------------------------------------------------------------------------|------|-------------------------------------------------------------------------------------------------------------------------------------------------------------------------------------|----------------------------------------------------------------------------------------------|---------------------------------------------------------------|------------------------|-----------------------|-----------------------------------------------------------------------------------------------------------------------------------------------|--------|
| Booyesen H <sup>155</sup>   | 2016 South Africa South    | participants from families of black African descent                                  | 1221 | Age (years):44.1±18.4<br>Male gender:34.9%<br>BMI (kg/m <sup>2</sup> ):29.5±8.0<br>Hypertension: 45%<br>Diabetes mellitus:25.2%                                                     | eGFR<60ml/min/1.73 m <sup>2</sup>                                                            | eGFR by CG, 4 variables MDRD, CKD-EPI                         | IDMS calibrated        | Not measured          | <b>Total prevalence:6.3%</b>                                                                                                                  | High   |
| Kalyesubula R <sup>90</sup> | 2017 Uganda East           | Community based survey among all households of Wakiso district                       | 955  | Age (years):31 (IQR: 24–42)<br>Male gender: 33%<br>BMI(kg/m <sup>2</sup> ) categories:<br>Underweight:5.5%<br>Normal: 56.9%<br>Overweight:24.2%<br>obese : 13.4%<br>Diabetics: 5.9% | KDOQI                                                                                        | Proteinuria by dipstick and eGFR by CG, MDRD, and CKD-EPI     | Kinetic Jaffe          | 0.3%                  | <b>Total prevalence: 15.2%</b><br><b>Prevalence by stage:</b><br>Stage 1: 6.2%<br>Stage 2:12.7%<br>Stage 3:2.4%<br>Stage 4:0<br>Stage 5: 0.1% | High   |
| Kaze F <sup>91</sup>        | 2015 Cameroon Central-West | Population of the Littoral region                                                    | 500  | Age (years): 45.3 ± 13.2<br>Male gender: 53.4%<br>BMI (kg/m <sup>2</sup> ): 27.1 ± 5.3<br>Diabetes mellitus: 2.8%<br>Hypertension: 12.2%                                            | any albuminuria and/or eGFR <60 ml/min/1.73m <sup>2</sup>                                    | Albuminuria by dipstick and eGFR by CG, MDRD, CKD-EPI         | Kinetic Jaffe and IDMS | 7.2%                  | <b>Total prevalence (CKD-EPI): 10%</b><br>[14.2% by CG, 11%MDRD]                                                                              | High   |
| Kaze F <sup>112</sup>       | 2015 Cameroon Central-West | Population of the Western Region                                                     | 439  | Age (years):47 ± 16.1<br>Male gender: 42.1%<br>Hypertension: 10.7%<br>Diabetes mellitus: 5.9%                                                                                       | Albuminuria and/or eGFR <60 ml/min confirmed 3 months later                                  | Albuminuria by dipstick and ACR and eGFR by CG, MDRD, CKD-EPI | Kinetic Jaffe and IDMS | 12.1% had albuminuria | <b>Total prevalence (CKD-EPI): 27.6%</b><br>[38.5% by CG, 27.3%MDRD]                                                                          | High   |
| Laurence E <sup>130</sup>   | 2016 South Africa South    | Teachers from public schools in the urban area of the Metro South Education District | 489  | Age (years): 46.3 ± 8.5<br>Male gender: 30%<br>BMI(kg/m <sup>2</sup> ):males: 29.1 ± 4.8, females: 32.4.1 ± 7.<br>Hypertension: 48.5%<br>Diabetes mellitus: 10.1%                   | Proteinuria ≥0.30 mg/mg or eGFR <60 ml/min/1.73 m <sup>2</sup>                               | Proteinuria by PCR and eGFR using MDRD                        | Kinetic Jaffe          | Not mentioned         | <b>Total prevalence: 10.4%</b>                                                                                                                | Medium |
| Lunyera J <sup>92</sup>     | 2016 Uganda East           | Urban residents of Kampala                                                           | 141  | Age (years): 64% in age group of 18-39<br>Male gender: 43%<br>BMI( kg/m <sup>2</sup> ): 25.9 (IQR 22.7–30.7)<br>Hypertension: 38%<br>Impaired fasting blood glucose: 13%            | Proteinuria as urine protein of ≥1+ on dipstick in the absence of hematuria and leukocyturia | Proteinuria by dipstick                                       | Not measured           | 13%                   | <b>Total prevalence(based on proteinuria): 13%</b>                                                                                            | Low    |
| Mogueo A <sup>131</sup>     | 2015 South Africa South    | Household residents of Bellville                                                     | 902  | Age (years): 55±15<br>Male gender: 23%<br>BMI( kg/m <sup>2</sup> ): 29.9 ± 7.2<br>Hypertension: 49.8%<br>Diabetes mellitus: 27.9%                                                   | eGFR <60 ml/min/1.73 m <sup>2</sup> or any nephropathy                                       | Albuminuria by ACR and eGFR by MDRD and CKD-EPI               | Kinetic Jaffe          | 2.3%                  | <b>Total prevalence( CKD-EPI): 21.7%</b><br>[ prevalence by MDRD: 29.7%]                                                                      | Medium |
| Peck R <sup>148</sup>       | 2016, Tanzania             | Stratified multistage                                                                | 1043 | Age (years):35.5 ± 15.3<br>Male gender: 45.7%                                                                                                                                       | eGFR<60 ml/min/1.73 m <sup>2</sup>                                                           | eGFR by MDRD and CKD-EPI                                      | Kinetic Jaffe          | Not measured          | <b>Total prevalence )CKD-EPI): 7%</b>                                                                                                         | High   |

|                           |                      |                                                               |     |                                                                                                                                                                 |                                                                                                                                 |                                                                     |               |               |                                 |      |
|---------------------------|----------------------|---------------------------------------------------------------|-----|-----------------------------------------------------------------------------------------------------------------------------------------------------------------|---------------------------------------------------------------------------------------------------------------------------------|---------------------------------------------------------------------|---------------|---------------|---------------------------------|------|
|                           | , East               | sampling of adult population in Mwanza city, Geita and Kahama |     | BMI( kg/m <sup>2</sup> ) categories:<br>Underweight: 10.5%<br>Normal: 71%<br>Overweight: 11.8%<br>Obese :6.6%<br>Diabetes mellitus: 0.9%<br>Hypertension: 17.3% |                                                                                                                                 |                                                                     |               |               |                                 |      |
| Stanifer J <sup>132</sup> | 2016, Tanzania, East | stratified, cluster-designed cross-sectional household        | 481 | Age (years): 46.9 ± 15.1<br>Male gender: 74.4%<br>Diabetes mellitus: 9.4%<br>Hypertension: 31%                                                                  | presence of albuminuria (≥30 mg/dl; confirmed by repeat assessment) and/or a reduction in eGFR ≤60 ml/min/1.73 m <sup>2</sup>   | Quantitative assessment of albuminuria and eGFR by MDRD and CKD-EPI | IDMS          | 6.8%          | <b>Total prevalence : 11.9%</b> | High |
| Stanifer J <sup>133</sup> | 2015, Tanzania, East | Randomly selected adults                                      | 481 | Age (years): 45 (IQR 35–59)<br>Male gender: 25.6%<br>Diabetes mellitus: 12.7%<br>Hypertension: 28%                                                              | eGFR<60 ml/min/1.73m <sup>2</sup> and/or persistent albuminuria                                                                 | Quantitative assessment of albuminuria and eGFR by MDRD             | IDMS          | Not mentioned | <b>Total prevalence: 7%</b>     | High |
| Stanfier J <sup>134</sup> | 2016, Tanzania, East | stratified, cluster-designed cross-sectional survey           | 606 | Age (years): 45.5 ±15.5<br>Male gender: 24.6%<br>Diabetes mellitus: 10.1%<br>Hypertension: 23.7%                                                                | the presence of albuminuria (≥30mg/dl confirmed by repeat assessment) and/or a once-measured eGFR ≤60 ml/min/1.73m <sup>2</sup> | Quantitative assessment of albuminuria and eGFR by MDRD             | IDMS          | Not mentioned | <b>Total prevalence: 8%</b>     | High |
| Wachukwu C <sup>93</sup>  | 2015, Nigeria, West  | Adult volunteers in a university                              | 259 | Age (years):28.3±9.7<br>Male gender: 52.1%<br>SBP(mmHg):117.3±15.5<br>DBP(mmHg): 75.7±11.7                                                                      | eGFR<60 ml/min/1.73m <sup>2</sup>                                                                                               | Proteinuria by dipstick and eGFR by CG                              | Not mentioned | 12.4%         | <b>Total prevalence: 1.9%</b>   | Low  |

DM: diabetes mellitus, BMI: body mass index, SBP: systolic blood pressure, DBP: diastolic blood pressure, IDMS: Isotope dilution mass spectrometry, MDRD: Modification of Diet in Renal Disease, CG: Cockcroft Gault,

CKD-EPI: Chronic Kidney Disease Epidemiology Collaboration, IQR: inter-quartile range, KDOQI: Kidney Disease Outcome Quality Initiative

Table 3: Studies on CKD among HIV patients

1  
2  
3  
4  
5  
6  
7  
8  
9  
10  
11  
12  
13  
14  
15  
16  
17  
18  
19  
20  
21  
22  
23  
24  
25  
26  
27  
28  
29  
30  
31  
32  
33  
34  
35  
36  
37  
38  
39  
40  
41  
42  
43  
44  
45  
46  
47  
48  
49

| Author                 | Year, Country, Region                  | Location                             | N    | Study group                                 | Population characteristics                                                                                                                                      | Definition of CKD                                                                                                                                       | Method of outcome assessment | Creatinine assay | Proteinuria  | CKD prevalence                                                                                                                | Quality assessment |
|------------------------|----------------------------------------|--------------------------------------|------|---------------------------------------------|-----------------------------------------------------------------------------------------------------------------------------------------------------------------|---------------------------------------------------------------------------------------------------------------------------------------------------------|------------------------------|------------------|--------------|-------------------------------------------------------------------------------------------------------------------------------|--------------------|
| Wkba O <sup>142</sup>  | 2013, Ghana, West                      | ART clinic at the regional hospital  | 442  | HIV (276) HAART-naïve patients 166 on HAART | Age (years): HAART-naïve (33.42 ± 0.88), On HAART (36.91 ± 0.77)<br>Male gender: HAART-naïve (28.3%), On                                                        | eGFR < 60 mL/min/1.73 m <sup>2</sup> for > 3months                                                                                                      | CG, 186 MDRD, CKD-EPI        | Kinetic Jaffe    | Not measured | <b>Total prevalence (CKD-EPI): 10.2%</b><br>HAART naïve: 8.7% CG, 9.1% MDRD, <b>8.7%</b><br><b>CKD-EPI</b><br>On HAART: 14.5% | Low                |
| Stöhr W <sup>143</sup> | 2011, Uganda, Zimbabwe, East and South | Three centers in Uganda and Zimbabwe | 3316 | HIV-infected patients initiating ART        | Age (years): 36.8 (32-42.2)<br>Male gender: 35%<br>SBP: median:110 (IQR:100-120) mmHg<br>DBP: median:70 (60-80) mmHg<br>BMI: 21.1 (19.1–23.6) kg/m <sup>2</sup> | eGFR<60 ml/min/1.73 m <sup>2</sup> on ≥ 2 consecutive visits 80 days apart or confirmed 25% decrease if eGFR <60 ml/min/1.73 m <sup>2</sup> at baseline | CG                           | Kinetic Jaffe    | Not measured | <b>Total prevalence : 7.2%</b>                                                                                                | Medium             |
| Stöhr W <sup>144</sup> | 2008, Uganda, Zimbabwe, Uganda and     | Three centers in Uganda and          | 3316 | HIV-infected patients on ART                | Age (years): 36.8 (32-42.2)<br>Male gender: 35%                                                                                                                 | eGFR<60 ml/min 1.73 m <sup>2</sup> on ≥ 2 consecutive                                                                                                   | 186 MDRD, CG                 | Kinetic Jaffe    | Not measured | <b>Total prevalence ( MDRD):3.1% , CG 7.4%</b>                                                                                | Medium             |

1  
2  
3  
4  
5  
6  
7  
8  
9  
10  
11  
12  
13  
14  
15  
16  
17  
18  
19  
20  
21  
22  
23  
24  
25  
26  
27  
28  
29  
30  
31  
32  
33  
34  
35  
36  
37  
38  
39  
40  
41  
42  
43  
44  
45  
46  
47  
48  
49

For peer review only

|  |                     |                        |     |                       |                                                                                                                                                                                                                             |                                                                                                       |                                           |               |             |            |                                                                                                                                                                               |        |
|--|---------------------|------------------------|-----|-----------------------|-----------------------------------------------------------------------------------------------------------------------------------------------------------------------------------------------------------------------------|-------------------------------------------------------------------------------------------------------|-------------------------------------------|---------------|-------------|------------|-------------------------------------------------------------------------------------------------------------------------------------------------------------------------------|--------|
|  | East and South      | Zimbabwe               |     |                       | SBP: median:110 (IQR:100-120) mmHg<br>DBP: median:70 (60-80) mmHg<br>BMI categories:<br><18.5 kg/m <sup>2</sup> : 18%<br>18.5- <25 kg/m <sup>2</sup> : 66%<br>25-<30 kg/m <sup>2</sup> : 12%<br>≥ 30 kg/m <sup>2</sup> : 4% | occasions >80 days apart or confirmed 25% decrease if eGFR <60 ml/min/1.73 m <sup>2</sup> at baseline |                                           |               |             |            |                                                                                                                                                                               |        |
|  |                     | Outpatients HIV clinic |     |                       | Age (years): 40.1 (33-46.5) Male gender:29.7%<br>Hypertension: 2.7%<br>DM: 2%<br>BMI: median: 21.8 (19.3-24.2) kg/m <sup>2</sup>                                                                                            |                                                                                                       | Proteinuria by urinary strip, CG, 186MDRD | Not mentioned |             | 6.10%      | <b>Total prevalence (MDRD): 45.7%</b><br>GG: 46.5%<br><b>Prevalence by Stages ( using MDRD)</b><br>Stage 1: 30.2%<br>Stage 2:13.5%<br>Stage 3: 2%<br>Stage 4 & 5: no patients | Medium |
|  | 2011, Burundi, East |                        | 300 | HIV-infected patients |                                                                                                                                                                                                                             |                                                                                                       |                                           |               |             |            |                                                                                                                                                                               |        |
|  | 2014, Congo,        | Outpatient HIV clinic  | 235 | HIV-infected patients | Age (years): 40.0 ± 10.7                                                                                                                                                                                                    | Proteinuria ≥ +1 by urinary strip or                                                                  | Proteinuria by urinary                    | Not measured  | Proteinuria | ≥+1: 41.3% | <b>Total prevalence ( based on</b>                                                                                                                                            | Low    |

1  
2  
3  
4  
5  
6  
7  
8  
9  
10  
11  
12  
13  
14  
15  
16  
17  
18  
19  
20  
21  
22  
23  
24  
25  
26  
27  
28  
29  
30  
31  
32  
33  
34  
35  
36  
37  
38  
39  
40  
41  
42  
43  
44  
45  
46  
47  
48  
49

|                         |                                        |                                                |      |  |                                                                                                                                                                                                                       |                                                                                                                                                            |                                      |               |              |                              |                                                                  |     |
|-------------------------|----------------------------------------|------------------------------------------------|------|--|-----------------------------------------------------------------------------------------------------------------------------------------------------------------------------------------------------------------------|------------------------------------------------------------------------------------------------------------------------------------------------------------|--------------------------------------|---------------|--------------|------------------------------|------------------------------------------------------------------|-----|
|                         | Central                                |                                                |      |  | Male gender: 27.8%<br>Hypertension: 46.8%.<br>DM: 1.7%<br>BMI: 22.3 ± 3.8 kg/m <sup>2</sup>                                                                                                                           | albuminuria ≥30 mg/dl                                                                                                                                      | strip and ACR                        |               |              | <b>proteinuria): 41.3%</b>   |                                                                  |     |
|                         |                                        | Three centres in Uganda and Zimbabwe           |      |  | age(years): 36.8 (IQR: 32.0–42.2)<br>male gender: 35%<br>SBP: median:110 (IQR: 100-120) mmHg<br>DBP: median:70 (IQR: 60-80) mmHg<br>HIV-infected, ART-naive adults with CD4+ cell counts of<200 cells/mm <sup>3</sup> | eGFR<60 ml/min 1.73 m <sup>2</sup> on ≥2 consecutive occasions >80 days apart or confirmed 25% decrease if eGFR <60 ml/min/1.73 m <sup>2</sup> at baseline |                                      | Kinetic Jaffe |              | <b>Total prevalence : 7%</b> | Medium                                                           |     |
| Reid A <sup>145</sup>   | 2008, Uganda, Zimbabwe, East and South |                                                | 3316 |  |                                                                                                                                                                                                                       |                                                                                                                                                            | CG                                   |               | Not measured |                              |                                                                  |     |
|                         |                                        | HIV outpatient clinic at Johannesburg Hospital |      |  | Age (years): 37 (range 16–70 years)<br>Male gender: 38%<br>DM: 4.6% among patients                                                                                                                                    | Proteinuria ≥ +1 by urinary strip or albuminuria ≥30 mg/dl                                                                                                 | Proteinuria by urinary strip and PCR |               | Not measured | 43.7% had proteinuria        | <b>Total prevalence (based on proteinuria prevalence): 43.7%</b> | Low |
| Fabian J <sup>108</sup> | 2009, South Africa, South              |                                                | 578  |  |                                                                                                                                                                                                                       |                                                                                                                                                            |                                      |               |              |                              |                                                                  |     |

|                        |                      |                                                                                         |      |                                                                          |                                                                                                               |                                                                              |                                                          |                        |              |                                                                                                                                     |        |
|------------------------|----------------------|-----------------------------------------------------------------------------------------|------|--------------------------------------------------------------------------|---------------------------------------------------------------------------------------------------------------|------------------------------------------------------------------------------|----------------------------------------------------------|------------------------|--------------|-------------------------------------------------------------------------------------------------------------------------------------|--------|
|                        |                      |                                                                                         |      |                                                                          | group with microalbuminuria                                                                                   |                                                                              |                                                          |                        |              |                                                                                                                                     |        |
| Lucas G <sup>154</sup> | 2010, Uganda, East   | All consenting individuals residing in every household in 50 Rakai District communities | 1960 | 1202 HIV-infected patients and 664 HIV -ve age- and sex-matched controls | Age (years): HIV-ve, 28 (IQR: 24–35), HIV+ve: 30 (IQR: 25–36)<br>Male gender: HIV-ve: (38.7%), HIV+ve (36.4%) | eGFR < 60ml/min/1.73 m <sup>2</sup>                                          | MDRD                                                     | IDMS-calibrated        | Not measured | <b>Total prevalence among HIV+ve : 0.7%</b>                                                                                         | Medium |
| Fao J <sup>160</sup>   | 2011, sub-Saharan,   | Primary health care units                                                               | 2495 | HIV-infected patients before ART                                         | Age (years): 30 (IQR: 27–35)<br>Male gender: 30%<br>BMI: 22.8 (IQR: 20.4–25.6) kg/m <sup>2</sup>              | CrCl < 50 ml/min                                                             | CG, 186 MDRD, CKD-EPI                                    | Not mentioned          | Not measured | <b>Total prevalence (CKD-EPI with coefficient for black race): 2.5%</b><br>CG: 3.4%<br>(MDRD with coefficient for black race): 2.5% | Medium |
| Longo A <sup>99</sup>  | 2012, Congo, Central | Consecutive HIV patients from clinic                                                    | 300  | HIV-infected (ART treated=264) (ART naïve =36)                           | Age (years): 43 ± 9<br>Male gender: 23%<br>Hypertension: 13%                                                  | eGFR < 60 ml/min/1.73 m <sup>2</sup> or proteinuria defined as 1+ or greater | proteinuria by dipstick and 24-hour proteinuria, eGFR by | Kinetic Jaffe and IDMS | 20.50%       | <b>Total prevalence : 20.5%</b><br><b>3% of the patients had eGFR &lt; 60 ml/min/1.73 m<sup>2</sup> by</b>                          | Low    |



1  
2  
3  
4  
5  
6  
7  
8  
9  
10  
11  
12  
13  
14  
15  
16  
17  
18  
19  
20  
21  
22  
23  
24  
25  
26  
27  
28  
29  
30  
31  
32  
33  
34  
35  
36  
37  
38  
39  
40  
41  
42  
43  
44  
45  
46  
47  
48  
49

|                         |                                        |                                                                               |      |                                    | BMI: 24 ± 5<br>(kg/m <sup>2</sup> )                                                                            |                                                                                            | MDRD, CG                                                          |               |              | MDRD                                              |        |
|-------------------------|----------------------------------------|-------------------------------------------------------------------------------|------|------------------------------------|----------------------------------------------------------------------------------------------------------------|--------------------------------------------------------------------------------------------|-------------------------------------------------------------------|---------------|--------------|---------------------------------------------------|--------|
| Farfo F <sup>109</sup>  | 2013,<br>Ghana,<br>West                | HIV clinic                                                                    | 3137 | HIV-infected patients starting ART | Age (years): 38 (32-45)<br>Male gender: 33%<br>BMI: 20.3 (IQR: 17.6-22.7) kg/m <sup>2</sup>                    | eGFR <60 ml/min/1.73 m <sup>2</sup> ; or proteinuria ≥+ 1 (confirmed by uPCR > 45 mg/mmol) | Proteinuria by urinary strip, ACR, PCR, eGFR by CG, MDRD, CKD-EPI | Not mentioned |              | <b>Total prevalence (CKD-EPI): 13.8%</b>          | Low    |
| Gupta S <sup>161</sup>  | 2011,<br>Cameroon,<br>Central-<br>West | Electronic medical records of patients from 18 sites throughout Western Kenya | 7383 | HIV patients without ART           | Age (years): 35.5 (29.3-44.0)<br>Male gender: 26.9%                                                            | eGFR <60 ml/min/1.73 m <sup>2</sup>                                                        | CG, MDRD                                                          | Not mentioned |              | <b>Total prevalence (MDRD): 9.4%</b><br>CG: 20.2% | Medium |
| Ekant MH <sup>146</sup> | 2013,<br>Congo,<br>Central             | Ambulatory Treatment Center                                                   | 562  | Newly diagnosed HIV patients       | Age (years): 38.84 (IQR: 33.18-46.23)<br>Male gender: 33.9%<br>BMI: 20.31 (IQR: 17.97-22.89) kg/m <sup>2</sup> | eGFR < 60 ml/min/1.73m <sup>2</sup>                                                        | 186MDRD                                                           | Kinetic Jaffe | Not measured | <b>Total prevalence : 8.5%</b>                    | Low    |

1  
2  
3  
4  
5  
6  
7  
8  
9  
10  
11  
12  
13  
14  
15  
16  
17  
18  
19  
20  
21  
22  
23  
24  
25  
26  
27  
28  
29  
30  
31  
32  
33  
34  
35  
36  
37  
38  
39  
40  
41  
42  
43  
44  
45  
46  
47  
48  
49

|                                  |                     |                                                                             |     |                                         |                                                                                                                                                                                            |                                                                                                |                                                             |               |                                                           |                                                                                          |        |
|----------------------------------|---------------------|-----------------------------------------------------------------------------|-----|-----------------------------------------|--------------------------------------------------------------------------------------------------------------------------------------------------------------------------------------------|------------------------------------------------------------------------------------------------|-------------------------------------------------------------|---------------|-----------------------------------------------------------|------------------------------------------------------------------------------------------|--------|
| Wools-Kaloustian K <sup>80</sup> | 2007, Kenya, East   | Academic Model for the Prevention and Treatment of HIV/AIDS (AMPATH) clinic | 373 | HIV-infected patients naive to ART      | Age (years): 35.0 (range, 19–60)<br>Male gender: 32.1%<br>SBP: 104.7 (range, 80–140) mm/Hg                                                                                                 | CrCl<60 ml/min/1.73 m <sup>2</sup>                                                             | proteinuria by urinary strip, CG, full and abbreviated MDRD | Kinetic assay | 6.2% (proteinuria ≥1+)                                    | <b>Total prevalence :11.50%</b>                                                          | Low    |
| Emem C <sup>81</sup>             | 2008, Nigeria, West | HIV/AIDS outpatient clinic                                                  | 400 | HIV-infected patients                   | Age (years): 34.6 ± 9.4<br>Male gender: 48.5%<br>Hypertension: 13.2%<br>BMI categories: <19.0 kg/m <sup>2</sup> : 59.2%<br>19-25 kg/m <sup>2</sup> : 37.5%<br>>25 kg/m <sup>2</sup> : 3.3% | albuminuria +1 or on at least two occasions (4 weeks apart) and or serum creatinine >1.5 mg/dl | Proteinuria by urinary strip and 24 hours proteinuria , CG  | Not mentioned | 38% proteinuria with dipstick nephrotic range proteinuria | <b>Total prevalence :38.8 %</b><br>Among patients; 8.8% had CrCl <15 ml/min.             | Medium |
| Wyatt C <sup>82</sup>            | 2011, Rwanda, East  | Community based                                                             | 891 | 677 HIV-infected and 214 HIV-uninfected | Age (years): 34 (IQR: 30–39) HIV +ve/43 (IQR:34–50) HIV -ve<br>Male gender: 0                                                                                                              | eGFR<60 ml/min/1.73 m <sup>2</sup> / or proteinuria +1 or greater                              | proteinuria by urinary strip, eGFR by MDRD, CKD-EPI,        | Kinetic Jaffe | (9% among HIV + and 7.2% among non-infected)              | <b>Total prevalence among HIV +ve:9%</b><br>2.7% had eGFR< 60 ml/min/1.73 m <sup>2</sup> | Medium |

1  
2  
3  
4  
5  
6  
7  
8  
9  
10  
11  
12  
13  
14  
15  
16  
17  
18  
19  
20  
21  
22  
23  
24  
25  
26  
27  
28  
29  
30  
31  
32  
33  
34  
35  
36  
37  
38  
39  
40  
41  
42  
43  
44  
45  
46  
47  
48  
49

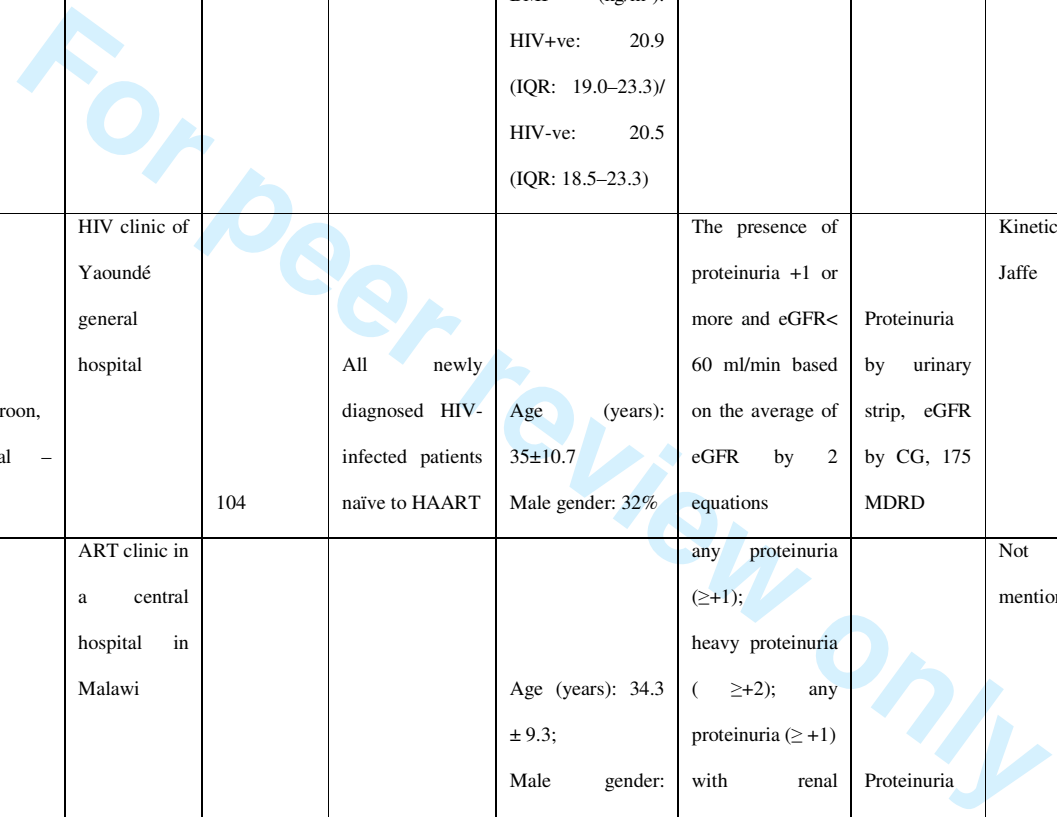

|                              |                                         |                                                     |     |                                                                    |                                                                                                                                                      |                                                                                                                                                                             |                                                                |                  |       |                                                                                                                                                  |     |
|------------------------------|-----------------------------------------|-----------------------------------------------------|-----|--------------------------------------------------------------------|------------------------------------------------------------------------------------------------------------------------------------------------------|-----------------------------------------------------------------------------------------------------------------------------------------------------------------------------|----------------------------------------------------------------|------------------|-------|--------------------------------------------------------------------------------------------------------------------------------------------------|-----|
|                              |                                         |                                                     |     |                                                                    | Hypertension:<br>HIV+ve: 4.8%/<br>HIV-ve: 8.3%<br>BMI (kg/m <sup>2</sup> ):<br>HIV+ve: 20.9<br>(IQR: 19.0–23.3)/<br>HIV-ve: 20.5<br>(IQR: 18.5–23.3) |                                                                                                                                                                             | CG                                                             |                  |       | CKD prevalence<br>among HIV-ve:<br>7.2%<br>1.5% had eGFR<<br>60 ml/min/1.73 m <sup>2</sup>                                                       |     |
| FolefackKaze F <sup>83</sup> | 2013,<br>Cameroon,<br>Central –<br>West | HIV clinic of<br>Yaoundé<br>general<br>hospital     | 104 | All newly<br>diagnosed HIV-<br>infected patients<br>naïve to HAART | Age (years):<br>35±10.7<br>Male gender: 32%                                                                                                          | The presence of<br>proteinuria +1 or<br>more and eGFR<<br>60 ml/min based<br>on the average of<br>eGFR by 2<br>equations                                                    | Proteinuria<br>by urinary<br>strip, eGFR<br>by CG, 175<br>MDRD | Kinetic<br>Jaffe | 36%   | <b>Total prevalence</b><br>: <b>36%</b><br>Among patients;<br>3% had eGFR< 60<br>ml/min/1,73 m <sup>2</sup>                                      | Low |
| Struik G <sup>84</sup>       | 2011,<br>Malawi,<br>East                | ART clinic in<br>a central<br>hospital in<br>Malawi | 526 | Consecutive<br>newly referred<br>HIV-infected<br>patients on ART   | Age (years): 34.3<br>± 9.3;<br>Male gender:<br>43.5%<br>Hypertension:<br>11.2%<br>DM: 0.8%                                                           | any proteinuria<br>(≥+1);<br>heavy proteinuria<br>( ≥+2); any<br>proteinuria (≥ +1)<br>with renal<br>dysfunction (e<br>GFR <60<br>ml/min/1.73 m <sup>2</sup> )<br>and heavy | Proteinuria<br>by urinary<br>strip, eGFR<br>by CG and<br>MDRD  | Not<br>mentioned | 23.3% | <b>Total prevalence:</b><br><b>23.3%</b><br><b>Among patients</b><br><b>with proteinuria;</b><br><b>5.3% had CrCl&lt;</b><br><b>60 ml/minute</b> | Low |

1  
2  
3  
4  
5  
6  
7  
8  
9  
10  
11  
12  
13  
14  
15  
16  
17  
18  
19  
20  
21  
22  
23  
24  
25  
26  
27  
28  
29  
30  
31  
32  
33  
34  
35  
36  
37  
38  
39  
40  
41  
42  
43  
44  
45  
46  
47  
48  
49

|                          |                             |                                                                        |     |                                                    |                                       |                                                                                                                                                        |                                                                  |                  |                                                |                                                                                                            |     |
|--------------------------|-----------------------------|------------------------------------------------------------------------|-----|----------------------------------------------------|---------------------------------------|--------------------------------------------------------------------------------------------------------------------------------------------------------|------------------------------------------------------------------|------------------|------------------------------------------------|------------------------------------------------------------------------------------------------------------|-----|
|                          |                             |                                                                        |     |                                                    |                                       | proteinuria ( $\geq 2$ ) with renal dysfunction (CrCl $< 60$ mL/minute) and the absence of any alternative cause for renal dysfunction or proteinuria. |                                                                  |                  |                                                |                                                                                                            |     |
| Attolou V <sup>118</sup> | 1998,<br>Benin, West        | National<br>Central<br>hospital                                        | 92  | HIV-infected<br>patients                           | Age(years): 22±4<br>Male gender: 68 % | Proteinuria $> 0.5$<br>g/24 hrs and<br>SCr $>14$ mg/l                                                                                                  | Serum<br>creatinine<br>measurement<br>and 24-hour<br>proteinuria | Not<br>mentioned | Proteinuria<br>$>0.5$ g/24<br>hrs in<br>23.33% | <b>Total<br/>prevalence:27.16%</b>                                                                         | Low |
| Agaba EI <sup>170</sup>  | 2003,<br>Nigeria,<br>West   | infections<br>unit of the<br>Jos<br>University<br>Teaching<br>Hospital | 126 | Consecutive 79<br>AIDS patients<br>and 57 controls |                                       | Not known                                                                                                                                              | Not known                                                        | Not known        | 25% (AIDS<br>group)                            | <b>Total prevalence<br/>among AIDS<br/>group:51.80%</b><br>CKD prevalence<br>among control<br>group: 12.2% | Low |
| Fana GT <sup>100</sup>   | 2011,<br>Zimbabwe,<br>South | Outpatient<br>clinics                                                  | 159 | HIV-infected<br>patients naïve to<br>ART           |                                       | CrCl $< 60$<br>ml/min.<br>Proteinuria $\geq +1$<br>and/or PCR $> 20$                                                                                   | Proteinuria<br>by urinary<br>strip and 24-<br>hour               | Not<br>mentioned | 45.90%                                         | <b>Total prevalence :</b><br><b>45.9%</b><br>Among patients;<br>7.50% had CrCl $<$                         | Low |

1  
2  
3  
4  
5  
6  
7  
8  
9  
10  
11  
12  
13  
14  
15  
16  
17  
18  
19  
20  
21  
22  
23  
24  
25  
26  
27  
28  
29  
30  
31  
32  
33  
34  
35  
36  
37  
38  
39  
40  
41  
42  
43  
44  
45  
46  
47  
48  
49

|  |                              |                      |     |                                            |                                                                   |                                                                                                             |                                                                   |                             |                                |                                                                     |                                |     |
|--|------------------------------|----------------------|-----|--------------------------------------------|-------------------------------------------------------------------|-------------------------------------------------------------------------------------------------------------|-------------------------------------------------------------------|-----------------------------|--------------------------------|---------------------------------------------------------------------|--------------------------------|-----|
|  |                              |                      |     |                                            |                                                                   | mg/mg                                                                                                       | proteinuria,<br>eGFR by CG                                        |                             |                                | 60 ml/min                                                           |                                |     |
|  |                              | Medical center       |     |                                            |                                                                   | Microalbuminuria > urinary protein                                                                          |                                                                   | Not mentioned               |                                |                                                                     | Low                            |     |
|  |                              |                      |     |                                            | Age (years): 31(range,13-63)                                      | 30 and 300 mg/24 h.                                                                                         |                                                                   |                             |                                |                                                                     |                                |     |
|  |                              |                      |     |                                            | Male gender: 25%,                                                 | A cut-off serum creatinine level of 250 mmol/l was used to exclude those patients with advanced nephropathy | Proteinuria by urinary strip and 24-hour proteinuria, CG and MDRD |                             |                                |                                                                     |                                |     |
|  | 2006, South Africa, South    |                      | 615 | HIV patients not on ART                    | 117±14/70±9                                                       | 121±15/81±10                                                                                                |                                                                   |                             | 6%                             | <b>Total prevalence (based on proteinuria ): 6%</b>                 |                                |     |
|  | 2008, Uganda, East           | Home-Based AIDS Care | 508 | HIV patients starting HAART                | Age (years): 39 (median)                                          | CrCl of 25–50 ml/min                                                                                        | CG, 175 MDRD                                                      | Kinetic Jaffe               | Not measured                   | <b>Total prevalence: 20%</b>                                        | Low                            |     |
|  | 2011, Cameroon, Central-West | Clinics              | 389 | 199 HIV +ve and 190 HIV -ve pregnant women | Age (years): HIV+ve (27 (IQR: 24- 31)), HIV-ve (27 (IQR: 22 -31)) | Male gender: 0                                                                                              | Proteinuria (PCR > 200 mg/g)                                      | Not measured                | HIV+ve: 39.2%<br>HIV-ve: 20.9% | <b>Total prevalence among HIV+ve (based on proteinuria ): 39.2%</b> | Medium                         |     |
|  | 2011, Tanzania, East         | Outpatient clinics   | 355 | HIV-infected patients naïve to ART         | Age (years): 36.1 ±7.9                                            | Male gender: 35%                                                                                            | KDOQI                                                             | Proteinuria and albuminuria | Not mentioned                  | 36% proteinuria ≥                                                   | <b>Total prevalence: 85.6%</b> | Low |

1  
2  
3  
4  
5  
6  
7  
8  
9  
10  
11  
12  
13  
14  
15  
16  
17  
18  
19  
20  
21  
22  
23  
24  
25  
26  
27  
28  
29  
30  
31  
32  
33  
34  
35  
36  
37  
38  
39  
40  
41  
42  
43  
44  
45  
46  
47  
48  
49

|                          |                                 |                                                         |       |                                                                                                                        |                                                                                                                         |                                       |                                            |                                                     |                                               |        |
|--------------------------|---------------------------------|---------------------------------------------------------|-------|------------------------------------------------------------------------------------------------------------------------|-------------------------------------------------------------------------------------------------------------------------|---------------------------------------|--------------------------------------------|-----------------------------------------------------|-----------------------------------------------|--------|
|                          |                                 |                                                         |       |                                                                                                                        | BMI (kg/m <sup>2</sup> ): 21.3<br>±3.8                                                                                  |                                       | by urinary<br>strip eGFR<br>by CG,<br>MDRD | +1                                                  |                                               |        |
| Myer L <sup>162</sup>    | 2013, South<br>Africa,<br>South | primary<br>healthcare<br>clinic                         | 1861  | Consecutive 238<br>pregnant women,<br>1014 non-<br>pregnant, 609<br>men; HIV-<br>infected patients<br>eligible for ART | Age (years):<br>pregnant, 28 (IQR:<br>25–32), men, 37<br>(IQR: 32–45),<br>women, 33 (IQR:<br>28–39)<br>Male gender: 33% | CrCl< 60ml/min                        | Absolute Scr<br>and CG                     | Not<br>mentioned<br><br>Not<br>measured             | <b>Total prevalence:<br/>5.8%</b>             | Low    |
| Mulenga L <sup>163</sup> | 2008,<br>Zambia,<br>South       | Clinic                                                  | 25249 | HIV-infected,<br>ART-naïve<br>adults initiating<br>treatment                                                           | Age (years):<br>normal CrCl,<br>33.7±7.9,<br>decreased CrCl,<br>38.5±9.9<br>Male gender:<br>39.7%                       | CrCl< 60 ml/min                       | Absolute<br>Scr, eGFR<br>by CG and<br>MDRD | Not<br>mentioned<br><br>Not<br>measured             | <b>Total prevalence<br/>(MDRD): 3.2%</b><br>: | Medium |
| Adedeji T <sup>158</sup> | 2015,<br>Nigeria,<br>West       | The<br>University<br>of Ilorin<br>Teaching<br>hospital, | 183   | Newly diagnosed<br>HIV-infected<br>ART naïve<br>patients                                                               | Age (years): 37.9+<br>10.5<br>Male gender:<br>42.6%<br>BMI (kg/m <sup>2</sup> ):<br>20.88+ 3.56                         | eGFR< 60<br>ml/min/1.73m <sup>2</sup> | Absolute<br>Scr, eGFR<br>by MDRD           | Kinetic<br>Jaffe and<br>IDMS<br><br>Not<br>measured | <b>Total prevalence:<br/>24%</b>              | Low    |



1  
2  
3

|                                                                                                                      |                                                     |                                         |      |                                            |                                                                                                                                                                                                                                     |                                 |                                                              |                  |                                         |                                                                                         |        |
|----------------------------------------------------------------------------------------------------------------------|-----------------------------------------------------|-----------------------------------------|------|--------------------------------------------|-------------------------------------------------------------------------------------------------------------------------------------------------------------------------------------------------------------------------------------|---------------------------------|--------------------------------------------------------------|------------------|-----------------------------------------|-----------------------------------------------------------------------------------------|--------|
|                                                                                                                      |                                                     |                                         |      |                                            | DBP(mmHg): 72.9<br>± 9.5 among HIV<br>patients, 80.6 ± 6.8<br>among control<br>group                                                                                                                                                |                                 |                                                              |                  |                                         |                                                                                         |        |
| 13<br>14<br>15<br>16<br>17<br>18<br>19<br>20                                                                         | 2015,<br>Ghana,<br>West<br>Ghadwick D <sup>14</sup> | Komfo<br>Anokye<br>Teaching<br>Hospital | 330  | HIV patients on<br>ART                     | Age(years): 39<br>(IQR: 35–46)<br>Male gender: 25%<br>BMI(kg/m <sup>2</sup> ): 22.9<br>(IQR: 20.5–26.6)                                                                                                                             | Proteinuria or<br>CrCl<60ml/min | Proteinuria (dipsticks,<br>PCR, and<br>ACR) and<br>GFR by CG | Not<br>mentioned | 37% by<br>dipstick and<br>12% by<br>PCR | <b>Total prevalence<br/>(proteinuria) :</b><br><b>37%</b><br>CrCl<60 ml/min<br>among 7% | Low    |
| 21<br>22<br>23<br>24<br>25<br>26<br>27<br>28<br>29<br>30<br>31<br>32<br>33<br>34<br>35<br>36<br>37<br>38<br>39<br>40 | 2015,<br>Kenya,<br>East<br>EdwardsJ <sup>166</sup>  | Two primary<br>care clinics             | 2206 | 210 HIV+ve<br>patients and<br>1996 HIV –ve | Age (years): HIV<br>+ve: 43 (IQR: 39–<br>50), HIV-ve: 49<br>(IQR:40–56)<br>Male gender: HIV<br>+ve: 31%, HIV-<br>ve:28.7%<br>Hypertension:<br>HIV+ve:44%,<br>HIV-ve: 33.2%<br>Diabetes mellitus:<br>HIV +ve: 5% ,<br>HIV –ve: 15.2% | CrCl<60 ml/min                  | eGFR by<br>CKD-EPI                                           | Not<br>mentioned | Not<br>measured                         | <b>Total prevalence:</b><br><b>12.1%</b><br><b>HIV+ve: 17%</b><br><b>Hiv-ve: 11%</b>    | Medium |

41  
42  
43  
44  
45  
46  
47  
48  
49



1  
2  
3  
4  
5  
6  
7  
8  
9  
10  
11  
12  
13  
14  
15  
16  
17  
18  
19  
20  
21  
22  
23  
24  
25  
26  
27  
28  
29  
30  
31  
32  
33  
34  
35  
36  
37  
38  
39  
40  
41  
42  
43  
44  
45  
46  
47  
48  
49

|                            |                             |                                   |      |                                                                     |                                                                                                         |                                         |                                                                  |                                            |              |                                                                                             |        |
|----------------------------|-----------------------------|-----------------------------------|------|---------------------------------------------------------------------|---------------------------------------------------------------------------------------------------------|-----------------------------------------|------------------------------------------------------------------|--------------------------------------------|--------------|---------------------------------------------------------------------------------------------|--------|
| Glaser N <sup>14</sup>     | 2016, Malawi, East          | Lighthouse Clinic                 | 363  | 116 HIV +ve ART-naïve patients and 247 HIV-ve patients              | Age (years): 31 (IQR:26–39)<br>Male gender: 52%                                                         | eGFR < 60 ml/min                        | eGFR by CG, MDRD, and CKD-EPI with and without correction factor | IDMS calibrated creatinine and cystatin-C  | Not measured | <b>Total prevalence among HIV+ve (creatinine based CKD-EPI):1.9%</b>                        | Medium |
| Glaser N <sup>15</sup>     | 2016, Malawi, East          | Lighthouse Clinic                 | 363  | 116 HIV +ve patients and 247 HIV –ve patients                       | Age (years): 34.1 ±10.9<br>Male gender: 52%<br>BMI(kg/m <sup>2</sup> ): 23.2±4.8<br>Hypertension: 13.5% | KDOQI                                   | Proteinuria by dipstick and ACR, eGFR by CG, MDRD, and CKD-EPI   | IDMS calibrated creatinine and cystatin -C | 12.1%        | <b>Total prevalence : 13%</b><br>Prevalence among HIV+ve:22%<br>Prevalence among HIV-ve: 9% | Medium |
| Kamkuemah M <sup>167</sup> | 2015, South Africa, South   | Gugulethu Community Health Centre | 1092 | HIV infected patients initiated ART therapy                         | Age (years): 34 (IQR: 29- 41)<br>Male gender: 38%                                                       | eGFR < 60 ml/min                        | eGFR by CG                                                       | Not mentioned                              | Not measured | <b>Total prevalence: 2%</b>                                                                 | Medium |
| Nsagha D <sup>149</sup>    | 2015, Cameroon Central-West | Government hospitals              | 200  | HIV patients on HAART, DOTS or on the combined therapy (HAART/DOTS) | Age (years): 38.04 ± 10.52<br>Male gender: 50.5%                                                        | eGFR <60 ml/min per 1.73 m <sup>2</sup> | eGFR by MDRD                                                     | Kinetic Jaffe                              | Not measured | <b>Total prevalence: 8%</b>                                                                 | Low    |

1  
2  
3  
4  
5  
6  
7  
8  
9  
10  
11  
12  
13  
14  
15  
16  
17  
18  
19  
20  
21  
22  
23  
24  
25  
26  
27  
28  
29  
30  
31  
32  
33  
34  
35  
36  
37  
38  
39  
40  
41  
42  
43  
44  
45  
46  
47  
48  
49

|                          |                           |                                                               |     |                                                |                                                                                   |                                                                                                                    |                                                                |               |                       |                                                                                   |        |
|--------------------------|---------------------------|---------------------------------------------------------------|-----|------------------------------------------------|-----------------------------------------------------------------------------------|--------------------------------------------------------------------------------------------------------------------|----------------------------------------------------------------|---------------|-----------------------|-----------------------------------------------------------------------------------|--------|
| Odongo P <sup>94</sup>   | 2015, Uganda, East        | infectious diseases clinic of Gulu Regional Referral Hospital | 361 | Newly diagnosed HIV patients not receiving ART | Age (years): 31.4 ± 9.5<br>Male gender: 36.3%<br>BMI(kg/m <sup>2</sup> ) <18: 33% | eGFR <60 ml/min per 1.73 m <sup>2</sup>                                                                            | Proteinuria by dipstick and eGFR by MDRD                       | Not mentioned | Proteinuria ≥ +1: 52% | <b>Total prevalence:</b><br><b>14.4%</b>                                          | Low    |
| Okafor U <sup>136</sup>  | 2016, Nigeria, West       | University of Benin Teaching Hospital                         | 383 | HIV infected naïve patients                    | Age (years): 36.03 ± 9.08<br>Male gender: 41%                                     | eGFR <60 ml/min per 1.73 m <sup>2</sup> and/or evidence of kidney injury as detected when the PCR (mg/g) was ≥200. | Quantitative assessment of proteinuria by PCR and eGFR by MDRD | Kinetic Jaffe | Not mentioned         | <b>Total prevalence:</b><br><b>53.5%</b>                                          | Low    |
| Seape T <sup>156</sup>   | 2016, South Africa, South | Medical in-patients at the Chris Hani Baragwanath Hospital    | 100 | HIV infected naïve patients                    | Age (years): 37.0±9.6<br>Male gender: 60%<br>BMI(kg/m <sup>2</sup> ): 20.9 ±5.1   | eGFR <60 ml/min per 1.73 m <sup>2</sup>                                                                            | eGFR by CG, MDRD, CKD-EPI                                      | IDMS          | Not measured          | <b>Total prevalence:</b><br><b>16%</b>                                            | Low    |
| Wensink G <sup>137</sup> | 2015, South Africa, South | Rural Medical Centre                                          | 903 | HIV infected adult patients                    | Age (years): 40(IQR:34-48)<br>Male gender: 31%<br>Diabetes mellitus:              | Albuminuria or eGFR <60 ml/min / 1.73 m <sup>2</sup>                                                               | Albuminuria by ACR and eGFR by MDRD and                        | Not mentioned | 21%                   | <b>Total prevalence (albuminuria):</b><br><b>21%</b><br><b>2% had eGFR&lt; 60</b> | Medium |

1  
2  
3  
4  
5  
6  
7  
8  
9  
10  
11  
12  
13  
14  
15  
16  
17  
18  
19  
20  
21  
22  
23  
24  
25  
26  
27  
28  
29  
30  
31  
32  
33  
34  
35  
36  
37  
38  
39  
40  
41  
42  
43  
44  
45  
46  
47  
48  
49

|  |                           |                                                      |     |                                             |                                                                                                                                                                              |                                         |                          |               |              |                                |        |
|--|---------------------------|------------------------------------------------------|-----|---------------------------------------------|------------------------------------------------------------------------------------------------------------------------------------------------------------------------------|-----------------------------------------|--------------------------|---------------|--------------|--------------------------------|--------|
|  |                           |                                                      |     |                                             | 4%                                                                                                                                                                           |                                         | CKD-EPI                  |               |              | ml/min/1.73 m <sup>2</sup>     |        |
|  |                           |                                                      |     |                                             | Hypertension:<br>23%                                                                                                                                                         |                                         |                          |               |              |                                |        |
|  |                           | Outpatient infectious clinic at an academic hospital |     |                                             | Age (years):<br>37.9±9.4<br>Male gender:<br>35.5%<br>Diabetes mellitus:2.2%                                                                                                  |                                         |                          | IDMS          |              |                                | Medium |
|  | 2016, South Africa, South |                                                      | 650 | HIV infected patients initiating ART        | Hypertension:<br>7.8%                                                                                                                                                        | eGFR <60 ml/min per 1.73 m <sup>2</sup> | eGFR by MDRD and CKD-EPI |               | Not measured | <b>Total prevalence: 2 %</b>   |        |
|  |                           | Anchor H <sup>157</sup>                              |     |                                             |                                                                                                                                                                              |                                         |                          |               |              |                                |        |
|  |                           | Jimma University Specialized Hospital                |     |                                             | Age ( years):<br>HAART naïve:<br>38.25 ±10.8,<br>HAART +ve:<br>35.14 ±9.2<br>Male gender: 37%<br>BMI(kg/m <sup>2</sup> ) :<br>HAART naïve:<br>20.7±3.2, HAART +ve: 21.6 ±3.5 |                                         |                          | Kinetic Jaffe |              |                                | Medium |
|  | 2016, Ethiopia, East      |                                                      | 446 | (223 HAART naïve and 223 HAART experienced) | Hypertension:<br>3.36%<br>Diabetes mellitus:<br>21.4%                                                                                                                        | eGFR <60 ml/min per 1.73 m <sup>2</sup> | eGFR by CG               |               | Not measured | <b>Total prevalence: 18.2%</b> |        |
|  |                           | Mekuria Y <sup>150</sup>                             |     |                                             |                                                                                                                                                                              |                                         |                          |               |              |                                |        |

1  
2  
3  
4  
5  
6  
7  
8  
9  
10  
11  
12  
13  
14  
15  
16  
17  
18  
19  
20  
21  
22  
23  
24  
25  
26  
27  
28  
29  
30  
31  
32  
33  
34  
35  
36  
37  
38  
39  
40  
41  
42  
43  
44  
45  
46  
47  
48  
49

|  |  |  |  |  |  |  |  |  |  |  |  |
|--|--|--|--|--|--|--|--|--|--|--|--|
|  |  |  |  |  |  |  |  |  |  |  |  |
|--|--|--|--|--|--|--|--|--|--|--|--|

DM: diabetes mellitus, BMI: body mass index, SBP: systolic blood pressure, DBP: diastolic blood pressure, IDMS: Isotope dilution mass spectrometry, HAART: highly active antiretroviral therapy, DOTS: directly observed treatment short course, ART: antiretroviral therapy, MDRD: Modification of Diet in Renal Disease, CG: Cockcroft Gault , CKD-EPI: Chronic Kidney Disease Epidemiology , IQR: inter-quartile range , KDOQI: Kidney Disease Outcome Quality Initiative

For peer review only

Table 4: Studies on CKD among diabetic patients

| Study ID                    | Year, Country, Region | Location                                                     | N   | Study group                   | Population Characteristics                                                                                                                                                                            | Definition of CKD                                                                                               | Method of outcome assessment                                | Creatinine assay | proteinuria                                        | CKD prevalence                                       | Quality assessment |
|-----------------------------|-----------------------|--------------------------------------------------------------|-----|-------------------------------|-------------------------------------------------------------------------------------------------------------------------------------------------------------------------------------------------------|-----------------------------------------------------------------------------------------------------------------|-------------------------------------------------------------|------------------|----------------------------------------------------|------------------------------------------------------|--------------------|
| Janmohamed MN <sup>86</sup> | 2013, Tanzania, East  | diabetes mellitus clinic of Bugando Medical Centre in Mwanza | 369 | Consecutive diabetic patients | Age (years): 54 (IQR: 45-62)<br>Male gender: 46.6%<br>Hypertension: 57.5%<br>BMI (kg/m <sup>2</sup> ): 25.6 (IQR: 22.6–29.6)<br>Duration of DM (years): 6(3 – 11)<br>93.8% type 2 DM<br>6.2% type 1DM | eGFR $\leq$ 60 ml/min/1.73 m <sup>2</sup> or evidence of kidney damage (microalbuminuria or overt proteinuria). | Microalbuminuria, proteinuria by urinary strips, eGFR by CG | Kinetic Jaffe    | Overt proteinuria (34.1%), microalbuminuria(45.8%) | <b>Total prevalence:83.7%</b>                        | Low                |
| Wanjohi FW <sup>87</sup>    | 2002, Kenya, East     | Outpatient diabetic clinic at Kenyatta National Hospital     | 100 | Type 2 diabetic patients      | Age (years): 53.7 $\pm$ 9.3<br>Male gender: 37%<br>Hypertension: 50%<br>BMI (kg/m <sup>2</sup> ): 27.8 $\pm$ 6.0<br>Duration of DM (months): 10.3 $\pm$ 7.5                                           | Albuminuria > 20 mg/ L                                                                                          | Albuminuria by urinary strip, CG                            | Not mentioned    | 26% had albuminuria                                | <b>Total prevalence( based on albuminuria ): 26%</b> | Low                |

|                          |                              |                                                                                         |     |                                                     |                                                                                                                                                |                                                                                                               |                                               |               |                                                       |                                          |     |
|--------------------------|------------------------------|-----------------------------------------------------------------------------------------|-----|-----------------------------------------------------|------------------------------------------------------------------------------------------------------------------------------------------------|---------------------------------------------------------------------------------------------------------------|-----------------------------------------------|---------------|-------------------------------------------------------|------------------------------------------|-----|
| Bouزيد C <sup>119</sup>  | 2011, Tunis, North           | Endocrinology center at the National Institute of nutrition                             | 689 | Type 2 diabetic patients from computerized hospital | Age (years): 60±11<br>Male gender: 39%<br>Hypertension: 84.6% (renal insufficiency), 57.2% (no renal disease)<br>Duration of DM (years): 11±8  | eGFR<60 ml/min                                                                                                | CG, 24-hour proteinuria                       | Not mentioned | 10.1%<br>macroalbuminuria,<br>13%<br>microalbuminuria | <b>Total prevalence:</b><br><b>19.8%</b> | Low |
| Choukem SP <sup>88</sup> | 2012, Cameroon, Central-West | Two main referral centres                                                               | 420 | Consecutive type 2 diabetic patients                | Age (years): 56.7 ±9.9<br>Male gender: 49%<br>Hypertension: 50%<br>BMI (kg/m <sup>2</sup> ): 28.5 ±5.2<br>Duration of DM (years): 4 (IQR: 1-9) | The presence of positive proteinuria with or without low CrCl < 90 ml/min/1.73 m <sup>2</sup>                 | Proteinuria by urinary strip/eGFR by CG       | Not mentioned |                                                       | <b>Total prevalence:</b><br><b>31%</b>   | Low |
| Keeton G <sup>120</sup>  | 2004, South Africa, South    | Groote Schuur Hospital Outpatients Diabetic Clinic or the Somerset Hospital Outpatients | 59  | Type 2 diabetic patients                            | Age (years): 62 ±9.4<br>Male gender: 36%<br>BMI (kg/m <sup>2</sup> ): (31± 6)<br>Duration of DM (years): 17 (Range: 14-33)                     | Double Scr level                                                                                              | Proteinuria by PCR, and serum creatinine      | Not mentioned |                                                       | <b>Total prevalence:</b><br><b>66.1%</b> | Low |
| BouAziz <sup>121</sup>   | 2012, Tunisia, North         | Basic Health Group of Sousse                                                            | 115 | 73 type 2 diabetic patients and 42 healthy          | Age (mean ±SE in years): 59.3 ±1.1<br>Male gender: 35%<br>SBP (mean ±SE mmHg): 136.3 ±3.1                                                      | Microalbuminuria (defined as < 2.8 g/mmol for women and < 2.3 for men) and eGFR≤60 ml/min/1.73 m <sup>2</sup> | Measurement of microalbuminuria, eGFR by MDRD | Not mentioned |                                                       | <b>Total prevalence:</b><br><b>11%</b>   | Low |

|                             |                       |                                     |     |                                             |                                                                                                                                                |                         |                                                           |               |                                            |                                                           |     |
|-----------------------------|-----------------------|-------------------------------------|-----|---------------------------------------------|------------------------------------------------------------------------------------------------------------------------------------------------|-------------------------|-----------------------------------------------------------|---------------|--------------------------------------------|-----------------------------------------------------------|-----|
|                             |                       |                                     |     | volunteers                                  | DBP (mean ±SE): 76.8<br>±1.9<br>BMI (mean ±SE in kg/m <sup>2</sup> ):<br>30.5± 0.7<br>Duration of DM (years):<br>10.6 ±1                       |                         |                                                           |               |                                            |                                                           |     |
| Katchunga P <sup>122</sup>  | 2010, Congo, Central  | Referral general hospital           | 98  | Medical records of type 2 diabetic patients | Age (years): 58 ±10.4<br>Male gender: 35.7%<br>Hypertension: 59.2%<br>BMI (kg/m <sup>2</sup> ): 25.2± 4.7<br>Duration of DM (years): 17.3 ±8.5 | KDOQI                   | Microalbuminuria (>20 mg/L and <200 mg/L)<br>eGFR by MDRD | Not mentioned |                                            | <b>Total prevalence: 66%</b>                              | Low |
| Djrolo F <sup>123</sup>     | 2001, Benin, West     | National University hospital centre | 152 | Type 1 and 2 diabetic patients              | Age (years): 53.3(range, 21-90)<br>Male gender: 65.8%<br>Duration of DM (years): <1 – 16 or more                                               | Presence of proteinuria | 24-hour proteinuria                                       | Not measured  | 28%                                        | <b>Total prevalence (based on proteinuria level): 28%</b> | Low |
| Balogun WO <sup>102</sup>   | 2011, Nigeria, West   | Tertiary hospital                   | 40  | Randomly selected type 2 diabetic patients  | Age (years): 59.4 ± 11.25<br>Male gender: 37.5%<br>Hypertension: 45%                                                                           | not mentioned           | Proteinuria by urinary strip and 24 hrs, eGFR by CG       | Jaffe method  | 82.5% macroalbuminuria                     | <b>Total prevalence: 90%</b>                              | Low |
| Mafundikwa A <sup>103</sup> | 2007, Zimbabwe, South | Diabetic clinic                     | 75  | Consecutive Insulin-dependent               | No available data                                                                                                                              | No available data       | Proteinuria by urinary strips and 24-hour                 |               | Overt proteinuria 21%.<br>Microalbuminuria | <b>Total prevalence: 33%</b>                              | Low |

|                         |                      |                                     |     |                                            |                                                                                                                                                                                                                                                  |                                                                                                                                                                                                                    |                                                    |               |                                                                                                                         |                                                                                                                      |        |
|-------------------------|----------------------|-------------------------------------|-----|--------------------------------------------|--------------------------------------------------------------------------------------------------------------------------------------------------------------------------------------------------------------------------------------------------|--------------------------------------------------------------------------------------------------------------------------------------------------------------------------------------------------------------------|----------------------------------------------------|---------------|-------------------------------------------------------------------------------------------------------------------------|----------------------------------------------------------------------------------------------------------------------|--------|
|                         |                      |                                     |     | diabetic patients                          |                                                                                                                                                                                                                                                  |                                                                                                                                                                                                                    | proteinuria                                        |               | 12%.                                                                                                                    |                                                                                                                      |        |
| Lutale J <sup>124</sup> | 2007, Tanzania, East | Outpatient diabetic clinic          | 204 | 91 Type 1 and 153 type 2 diabetic patients | 45% type 1 DM<br>55% type 2DM<br>Age (years): type 1, 21(14–44.8), type 2, 53 (23.5–85)<br>Male gender: 55%<br>hypertension: 42%<br>BMI (kg/m <sup>2</sup> ): 19.3 ± 3.8 (type 1), 27.8 ± 4.8 (type 2)<br>Duration of DM (years): 3(Range: 0-25) | KDOQI                                                                                                                                                                                                              | Quantitative assessment of albuminuria, CrCl by CG | Kinetic Jaffe | Type 1: microalbuminuria was 12.1% and macroalbuminuria 1.1%.<br>Type 2: microalbuminuria 9.8%<br>Macroalbuminuria 7.2% | <b>Total prevalence: 18.5%</b><br>4.6% of Type 1 patients and 22% of Type 2 had eGFR < 60 ml/min/1.73 m <sup>2</sup> | Low    |
| Gill G <sup>125</sup>   | 2008, Ethiopia, East | Diabetic clinic at Mekelle Hospital | 105 | All diabetic patients                      | Age (years): 41±16<br>Male gender: 70%<br>Hypertension: 5%<br>BMI (kg/m <sup>2</sup> ): 20.6 ±5.4<br>Duration of DM (years): 7±6                                                                                                                 | Nephropathy was considered present if the urinary ACR was >25.0mg/mmol and retinopathy was present. Microalbuminuria was diagnosed if the ACR was >2.5 and <25.0mg/mmol in men and >3.5 and <25.0mg/mmol in women. | ACR, Scr                                           | Not mentioned | 51% microalbuminuria                                                                                                    | <b>Total prevalence : 51%,</b>                                                                                       | Low    |
| Makulo R <sup>111</sup> | 2010, Congo, Central | Community based                     | 229 | 81 Diabetic and 148 impaired fasting       | Age (years): 53.1±16.3<br>Male gender: 33%<br>SBP (mmHg): 128.0±5.7<br>DBP (mmHg): 78.5±13.4<br>BMI (kg/m <sup>2</sup> ): 22.6±5.2                                                                                                               | eGFR of <60 mL/min/1.73 m <sup>2</sup>                                                                                                                                                                             | Urinary albumin by urinary strip and ACR, eGFR by  | Kinetic Jaffe | 29.6%                                                                                                                   | <b>Total prevalence: 29.6%</b><br>10% of the patients had eGFR< 60                                                   | Medium |



|                            |                                           |                                                                          |      | glucose patients                                       |                                                                                                                                                                                                   |                                        | 186MDRD                                       |               |                                                | ml/min/1.73 m <sup>2</sup>                                                        |        |
|----------------------------|-------------------------------------------|--------------------------------------------------------------------------|------|--------------------------------------------------------|---------------------------------------------------------------------------------------------------------------------------------------------------------------------------------------------------|----------------------------------------|-----------------------------------------------|---------------|------------------------------------------------|-----------------------------------------------------------------------------------|--------|
| Adebamowo S <sup>151</sup> | 2016, Nigeria, Ghana, Kenya (sub-Saharan) | University medical centers and surrounding communities                   | 4815 | 2208 Cases of type 2 DM and 2607 controls free from DM | Age (years): 48±15<br>Male gender:41%<br>Hypertension: ( 68.3% of type 2 DM, and 35.3% of diabetic-free)<br>BMI(kg/m <sup>2</sup> ): 26.9 ± 5.4 (diabetic patients)<br>25.5 ± 5.7 (non-diabetics) | eGFR of <60 ml/min/1.73 m <sup>2</sup> | eGFR by MDRD and CKD-EPI                      | Kinetic Jaffe | Not measured                                   | <b>Total prevalence (MDRD): 9%</b><br>13.4% of type 2DM and 4.8% of diabetic free | Medium |
| Feteh V <sup>95</sup>      | 2016, Cameroon, Central-West              | out-patient section of the endocrine unit of the Douala General Hospital | 636  | Cases of type 2 DM                                     | Age (years): 56.5 ± 10.6<br>Male gender: 53.1%<br>BMI (kg/m <sup>2</sup> ): 29.3 ± 14.7<br>Hypertension: 62.2%                                                                                    | eGFR of <60 ml/min/1.73 m <sup>2</sup> | Proteinuria by dipsticks and eGFR by 186 MDRD | Kinetic Jaffe | 68.4% among anemic patients , 57.6% non anemic | <b>Total prevalence: 18.5%</b>                                                    | Low    |
| Fiseha T <sup>152</sup>    | 2014, Ethiopia, East                      | Follow-up clinic at Butajira hospital                                    | 214  | Diabetic patients                                      | Age (years): 45 ± 14.5<br>Male gender: 57.5%<br>SBP(mmHg): 121 ± 17<br>DBP(mmHg): 79 ± 10<br>BMI(kg/m <sup>2</sup> ): 25.26 ± 4.35                                                                | eGFR of <60 ml/min/1.73 m <sup>2</sup> | eGFR by CG and 186 MDRD                       | Kinetic Jaffe | Not measured                                   | <b>Total prevalence (MDRD): 18.2%</b><br>Prevalence (CG):23.8%                    | Medium |
| Pillay S <sup>96</sup>     | 2016, South Africa,                       | All patients seen at Edendale                                            | 653  | Diabetic patients with or                              | Among diabetic patients with HIV:<br>Age( years): 50-70                                                                                                                                           | eGFR of <60 ml/min/1.73 m <sup>2</sup> | Proteinuria by dipstick and eGFR by 186       | Kinetic Jaffe | 18%                                            | <b>Total prevalence : 18.8%</b>                                                   | Medium |

|                        |                   |                                                                                            |     |                                                  |                                                                                                       |                                                               |                                                       |               |       |                                                             |     |
|------------------------|-------------------|--------------------------------------------------------------------------------------------|-----|--------------------------------------------------|-------------------------------------------------------------------------------------------------------|---------------------------------------------------------------|-------------------------------------------------------|---------------|-------|-------------------------------------------------------------|-----|
|                        | South             | Hospital diabetic clinic                                                                   |     | without HIV (149 DM and HIV; 504 DM without HIV) | Male gender: 32%<br>Among diabetic patients without HIV<br>Age ( years): 51-60                        |                                                               | MDRD                                                  |               |       |                                                             |     |
| Eghan B <sup>138</sup> | 2007, Ghana, West | Outpatient diabetic clinic of the department of medicine at Komfo Anokye Teaching Hospital | 109 | Diabetic patients                                | Age (years): 54.1±10.9<br>Male gender: 28%<br>Hypertension: 39%<br>BMI(kg/m <sup>2</sup> ): 26.3± 4.4 | microalbuminuria if urine albumin excretion was 30–300 mg/day | Albuminuria by urine albumin excretion and eGFR by CG | Not mentioned | 43.1% | <b>Total prevalence( based on microalbuminuria ): 43.1%</b> | Low |

DM: diabetes mellitus, BMI: body mass index, SBP: systolic blood pressure, DBP: diastolic blood pressure, IDMS: Isotope dilution mass spectrometry, MDRD: Modification of Diet in Renal Disease, CG: Cockcroft Gault , CKD-EPI: Chronic Kidney Disease Epidemiology Collaboration, IQR: inter-quartile range , KDOQI: Kidney Disease Outcome Quality Initiative

Table 5: Studies on CKD among hypertensive patients

| Study ID                 | Year<br>Country<br>Region    | Location                             | N   | Study group                                   | Population characteristics                                                                                                                                                                                                                                                    | Definition of CKD                                                    | Method of outcome assessment                                 | Creatinine assay | Proteinuria  | CKD prevalence                                                                                         | Quality assessment |
|--------------------------|------------------------------|--------------------------------------|-----|-----------------------------------------------|-------------------------------------------------------------------------------------------------------------------------------------------------------------------------------------------------------------------------------------------------------------------------------|----------------------------------------------------------------------|--------------------------------------------------------------|------------------|--------------|--------------------------------------------------------------------------------------------------------|--------------------|
| Osafo C <sup>126</sup>   | 2011<br>Ghana,<br>West       | four polyclinics                     | 712 | Hypertensive patients                         | Age (years): 59 (range,19–90)<br>Male gender: 21.3%<br>DM: 14.7%<br>SBP (mmHg): 150 (range,100–280)<br>DBP (mmHg): 90 (range, 60–160)<br>BMI (kg/m <sup>2</sup> ): 29.7 (range,12.2–67.4)<br>BMI categories (kg/m <sup>2</sup> ):<br><25: 22.3%<br>25-29.9: 26%<br>>30: 45.7% | KDOQI                                                                | Proteinuria by PCR (men>0.3 women>0.2 mg/mg)<br>eGFR by MDRD | Kinetic Jaffe    | 28.90%       | <b>Total prevalence: 46.90%</b><br><b>Prevalence by stage:</b><br>Stage 1-2: 19.1%<br>Stage 3-5: 27.8% | Low                |
| Ajayi S <sup>164</sup>   | 2014<br>Nigeria,<br>West     | Tertiary health centre               | 628 | Records of hypertensive and diabetic patients | Age (years): 49.71±13.22<br>Male gender : 49%<br>DM: 8.6%<br>SBP (mmHg): 135.9 ± 27.4<br>DBP (mmHg): 87.0 ± 16.3<br>BMI ( kg/m <sup>2</sup> ): 27.8 ± 8.7                                                                                                                     | eGFR <60 mL/min/1.73 m <sup>2</sup>                                  | eGFR by MDRD                                                 | Not mentioned    | Not measured | <b>Total prevalence: 38.5%</b>                                                                         | Low                |
| Lengani A <sup>127</sup> | 2000<br>Burkina Faso<br>West | department of Cardiology or Internal | 342 | Hypertensive patients                         | Age (years): 50.6 ±13.8<br>Male gender: 58%                                                                                                                                                                                                                                   | Serum creatinine ≥ 650 µmol/l and or blood urea ≥35 mmol/l plus long | Measurement of scr, 24-hour proteinuria                      | Not mentioned    |              | <b>Total prevalence: 50.8%</b>                                                                         | Low                |

|                              |                               |                                              |      |                                        |                                                                                                                                                   |                                                                                                                                  |                                                    |                      |                                              |                                                                                |        |
|------------------------------|-------------------------------|----------------------------------------------|------|----------------------------------------|---------------------------------------------------------------------------------------------------------------------------------------------------|----------------------------------------------------------------------------------------------------------------------------------|----------------------------------------------------|----------------------|----------------------------------------------|--------------------------------------------------------------------------------|--------|
|                              |                               | medicine                                     |      |                                        |                                                                                                                                                   | history with clinical manifestations                                                                                             |                                                    |                      |                                              |                                                                                |        |
| Nwankwo E <sup>165</sup>     | 2006<br>Nigeria<br>West       | University of Maiduguri Teaching Hospital    | 185  | All hospitalized hypertensive patients | Age (years): 44.6 ± 14.9<br>Male gender: 49%                                                                                                      | Scr >135 µmol/l                                                                                                                  | Measurement of Scr                                 | Not mentioned        | Not measured                                 | <b>Total prevalence: 45.50%</b>                                                | Low    |
| Rayner B <sup>128</sup>      | 2006<br>South Africa<br>South | 100 General practice centres                 | 1091 | Random hypertensive patients           | Age (years): ≥35 years<br>Male gender: 48.5%<br>BMI: 23.6% of the patients had a normal BMI<br>41.9% were overweight and 34.2% were frankly obese | Albuminuria defined as (mg/mmol) microalbuminuria 3-30 macroalbuminuria >30                                                      | Quantitative assessment of albuminuria by ACR      | not measured         | 21.3% microalbuminuria 4.1% macroalbuminuria | <b>Total prevalence (based on albuminuria): 25.4%</b>                          | Medium |
| Plange-Rhule J <sup>89</sup> | 1999<br>Ghana,<br>West        | Komfo Anokye Teaching Hospital               | 448  | Hypertensive patients                  | Age (years): 50.5 ±13.0<br>Male gender: 36%<br>SBP (mmHg): 165.0 ±27.8<br>DBP (mmHg): 101.9 ±17.9                                                 | Plasma creatinine ≥140mol/l                                                                                                      | Proteinuria by urinary strips and serum creatinine | Not mentioned        | 25.50%                                       | <b>Total prevalence: 30.2%</b>                                                 | Low    |
| Addo J <sup>141</sup>        | 2009<br>Ghana , West          | seven central government ministries in Accra | 219  | Hypertensive patients                  | Age (years): 50.4± 6.6<br>Male gender: 64%<br>SBP (mmHg):156.0 ±21.5<br>DBP (mmHg): 95 ±13<br>BMI (kg/m <sup>2</sup> ): 27.5 ± 5.4                | Persistent proteinuria on Urinalysis in the absence of urinary tract infection and/or impaired GFR<60 ml/min/1.73 m <sup>2</sup> | Proteinuria and eGFR by MDRD                       | Enzymatic assessment | 13.4%                                        | <b>Total prevalence: 13.4%</b><br>4.1% had eGFR< 60 ml/min/1.73 m <sup>2</sup> | Medium |

|                           |                   |                                                              |     |                                                                    |                                                                                                                                                                                                                                                                                                                                                                                                                                                                                                                 |                                                                            |                                                                 |               |       |                                                                                                               |     |
|---------------------------|-------------------|--------------------------------------------------------------|-----|--------------------------------------------------------------------|-----------------------------------------------------------------------------------------------------------------------------------------------------------------------------------------------------------------------------------------------------------------------------------------------------------------------------------------------------------------------------------------------------------------------------------------------------------------------------------------------------------------|----------------------------------------------------------------------------|-----------------------------------------------------------------|---------------|-------|---------------------------------------------------------------------------------------------------------------|-----|
| Aryee C <sup>139</sup>    | 2016, Ghana, West | Komfo Anokye Teaching Hospital and the surrounding community | 242 | 180 non-diabetic hypertensive patients and 61 age matched controls | <p>Age (years): 22-87</p> <p>Male gender:37%</p> <p>SBP (mmHg): hypertensive patients( on antihypertensive therapy:155.46±1.82, no antihypertensive therapy:152±3.27), control (117.38±0.96)</p> <p>DBP (mmHg): hypertensive patients( on antihypertensive therapy:101.46±0.94, no antihypertensive therapy: 100.50±1.34), control (73.28±0.77)</p> <p>BMI (kg/m<sup>2</sup>): hypertensive patients( on antihypertensive therapy:29.52±0.39, no antihypertensive therapy: 29.8±0.71), control (29.36±0.65)</p> | eGFR <60 ml/min/1.73m <sup>2</sup>                                         | Urine albumin excretion, and eGFR by CG , 186 MDRD, and CKD-EPI | Not mentioned | 30%   | <p><b>Total prevalence (CKD-EPI): 14.5%</b></p> <p>Prevalence by MDRD:13.3%</p> <p>Prevalence by CG:16.6%</p> | Low |
| Nabbaale J <sup>140</sup> | 2015 Uganda East  | out- patient hypertension clinic                             | 256 | Newly diagnosed eligible black adult hypertensive patients         | <p>Age (years): 54.3 ± 6.2</p> <p>Male gender: 36.7%</p>                                                                                                                                                                                                                                                                                                                                                                                                                                                        | Microalbuminuria as a random urine albumin level between 30 and 299 mg/dl. | Quantitative assessment of albumin in urine                     | Not measured  | 39.5% | <p><b>Total prevalence (based on microalbuminuria): 39.5%</b></p>                                             | Low |

DM: diabetes mellitus, BMI: body mass index, SBP: systolic blood pressure, DBP: diastolic blood pressure, IDMS: Isotope dilution mass spectrometry, MDRD: Modification of Diet in Renal Disease, CG: Cockcroft Gault , CKD-EPI: Chronic Kidney Disease Epidemiology Collaboration, IQR: inter-quartile range , KDOQI: Kidney Disease Outcome Quality Initiative

**Table 6: Studies on CKD among other populations**

| Study ID                     | Year<br>Country<br>Region | Location                                                                    | N   | Study group                                          | Population Characteristics                                                                                           | Definition of CKD                                                                                | Method of outcome assessment            | Creatinine assay | Proteinuria | CKD prevalence                                                                                                            | Quality assessment |
|------------------------------|---------------------------|-----------------------------------------------------------------------------|-----|------------------------------------------------------|----------------------------------------------------------------------------------------------------------------------|--------------------------------------------------------------------------------------------------|-----------------------------------------|------------------|-------------|---------------------------------------------------------------------------------------------------------------------------|--------------------|
| E.F K <sup>19</sup>          | 2013<br>Senegal<br>West   | Nephrology department of the Aristide Le Dantec University Hospital Center. | 43  | Lupus patients                                       | Age (years): 32.9<br>Male gender: 7%<br>Hypertension: 30%                                                            | Proteinuria > 0.5 g/24 hours with or without hematuria/renal insufficiency/abnormal renal biopsy | 24-hour proteinuria and eGFR by CG      | Not mentioned    | 51%         | <b>Total prevalence: 72%</b>                                                                                              | Low                |
| Abd ElHafeez S <sup>29</sup> | 2009<br>Egypt<br>North    | The Nephrology department at the Main Alexandria University hospital        | 400 | Relatives of ESRD patients                           | Age (years): 35.2±11.6<br>Male gender: 50.8%<br>Hypertension: 60%<br>DM: 11.5%<br>BMI(kg/m <sup>2</sup> ): 28.5±5.89 | KDOQI                                                                                            | Proteinuria by urinary strips, 186 MDRD | Kinetic Jaffe    | 21.3%       | <b>Total prevalence 57%</b><br><b>Prevalence by stage:</b><br>Stage 1: 9%<br>Stage 2: 44%<br>Stage 3: 4%<br>Stage 4: 0.3% | medium             |
| Raji Y <sup>28</sup>         | 2015,<br>Nigeria,         | Nephrology out-patient                                                      | 469 | (230 first degree relatives of patients with CKD and | Age (years): 33.49 ± 12.0<br>BMI(kg/m <sup>2</sup> ): first degree relatives: 25.5 ± 5.3, controls: 23.8 ± 4.0       | Reduced eGFR                                                                                     | Albuminuria by ACR and eGFR by MDRD     | Not mentioned    | 46%         | <b>Total prevalence:</b>                                                                                                  | Low                |

|                          |                   |                                              |     |                                                                                 |                                                                                                                                                                                                  |                                                                                                                                                                                |                                                             |                   |        |                                                                                            |        |
|--------------------------|-------------------|----------------------------------------------|-----|---------------------------------------------------------------------------------|--------------------------------------------------------------------------------------------------------------------------------------------------------------------------------------------------|--------------------------------------------------------------------------------------------------------------------------------------------------------------------------------|-------------------------------------------------------------|-------------------|--------|--------------------------------------------------------------------------------------------|--------|
|                          | West              | clinic at Lagos University Teaching Hospital |     | 230 age- and gender-matched controls with no personal or family history of CKD) | SBP(mmHg): first degree relatives: 116.5 ± 22.5, controls: 112.1 ± 18.1<br>DBP(mmHg): first degree relatives: 74.9 ± 12.7, controls: 71.4 ± 10.5                                                 |                                                                                                                                                                                |                                                             |                   |        | 4%                                                                                         |        |
| ElSharif M <sup>24</sup> | 2013 Sudan East   | Primary health care                          | 252 | Patients attending the primary health care facilities                           | Age (years): 43.35± 12.80<br>Male gender: 16%<br>Hypertension: 10%<br>DM: 5.95%<br>BMI (kg/m <sup>2</sup> ): 28.67 ± 6.43<br>BMI categories (kg/m <sup>2</sup> ):<br><18: 2.38%<br>>25.13: 71.83 | eGFR of < 60 mL/min/1.73 m <sup>2</sup> with or without proteinuria.                                                                                                           | Proteinuria by urinary strip and eGFR by MDRD               | Not mentioned     | 24.21% | <b>Total prevalence: 10.32%</b>                                                            | Low    |
| Mo A <sup>26</sup>       | 2009 Nigeria West | Family practice clinic                       | 250 | Newly registered patients who attended the Family Practice Clinic               | Age (years): 50.52 + 13.03<br>Male gender: 27.2%<br>32% elevated SBP, 30% elevated DBP<br>DM: 6%<br>Obesity: 32%                                                                                 | Persistently abnormal ACR irrespective of GFR level or persistent eGFR < 60 mL/min/1.73 m <sup>2</sup> irrespective of the presence or absence of Kidney damage after 3 months | Proteinuria by urinary strip, eGFR by MDRD                  | Standardized IDMS | 14.4%  | <b>Total prevalence: 14.4%</b><br>10.4% had persistent eGFR< 60 ml/min/1.73 m <sup>2</sup> | Medium |
| Sumaili EK <sup>25</sup> | 2009 Congo        | Primary and secondary                        | 527 | At risk population randomly selected                                            | Age (years): 53.9 ± 15.5<br>Male gender: 43%<br>Hypertension: 58.2%<br>DM: 54.5%<br>Obesity: 16%                                                                                                 | KDOQI                                                                                                                                                                          | Proteinuria by urinary strip, 24-hour proteinuria, 175 MDRD | Kinetic Jaffe     | 19%    | <b>Total prevalence: 36%</b><br><b>Prevalence by stage</b>                                 | High   |

|                          |                           |                                                     |      |                                                               |                                                                                                                                                    |                                                                                                          |                                                |                                   |                       |                                                                            |     |
|--------------------------|---------------------------|-----------------------------------------------------|------|---------------------------------------------------------------|----------------------------------------------------------------------------------------------------------------------------------------------------|----------------------------------------------------------------------------------------------------------|------------------------------------------------|-----------------------------------|-----------------------|----------------------------------------------------------------------------|-----|
|                          | Central                   | health care                                         |      |                                                               |                                                                                                                                                    |                                                                                                          |                                                |                                   |                       | stage 1: 4.2%, stage 2: 6.1%, stage 3: 18.3%, stage 4: 1.9%, stage 5: 5.7% |     |
| Anyabolu E <sup>30</sup> | 2016, Nigeria, West       | Federal Medical Center                              | 136  | Subjects from medical out-patient department of the hospital. | Age (years): 38.58±11.79<br>Male gender: 27.9%<br>BMI(kg/m <sup>2</sup> ): 25.51±6.47                                                              | Proteinuria as 24 hours protein ≥ 0.300g and impaired renal filtration function as CrCl <90mls/min       | Proteinuria by quantitative assessment and Scr | Kinetic Jaffe                     | 14.1% had proteinuria | <b>Total prevalence: 14.1%</b>                                             | Low |
| Dessein P <sup>20</sup>  | 2015, South Africa, South | Charlotte Maxeke Johannesburg and Milpark Hospitals | 233  | African patients with rheumatoid arthritis                    | Age (years): 57.1±10.8<br>Male gender: 17.2%<br>BMI(kg/m <sup>2</sup> ): 27.4±6.0<br>Hypertension: 57.5%<br>Diabetes mellitus: 12.5%               | eGFR < 60ml/min/1.73m <sup>2</sup>                                                                       | eGFR by CG, MDRD, CKD-EPI                      | Kinetic Jaffe and IDMS calibrated | Not measured          | <b>Total prevalence: 39%</b>                                               | Low |
| Ephraim R <sup>21</sup>  | 2015, Ghana, West         | Tema General Hospital                               | 194  | Patients with sickle cell anemia                              | Age (years): 23.25 ± 12.04<br>Male gender: 43.3%<br>SBP(mmHg): 110.06 ± 8.27<br>DBP(mmHg): 67.16 ± 8.23<br>BMI (kg/m <sup>2</sup> ): 18.85 ± 11.19 | (eGFR < 60 mL/min/ 1.73 m <sup>2</sup> or evidence of kidney damage as albuminuria, or overt proteinuria | Proteinuria by dipstick and eGFR by CKD-EPI    | IDMS                              | 13.4%                 | <b>39.2%</b>                                                               | Low |
| van                      | 2010                      | Tertiary                                            | 1216 | New patients referred to                                      | Age (years): 39.6 ± 15.9                                                                                                                           | Elevated SCr(>130                                                                                        | Proteinuria by quantitative                    | Not                               | 16.7%                 | <b>Total</b>                                                               | Low |



|                           |                                     |                                                                                    |    |                                                                                                                                               |                                                                     |                                                                            |                                                                          |               |                                                     |                                                                  |     |
|---------------------------|-------------------------------------|------------------------------------------------------------------------------------|----|-----------------------------------------------------------------------------------------------------------------------------------------------|---------------------------------------------------------------------|----------------------------------------------------------------------------|--------------------------------------------------------------------------|---------------|-----------------------------------------------------|------------------------------------------------------------------|-----|
| 27                        | Rensburg B<br>South Africa<br>South | hospital                                                                           |    | the Renal Unit                                                                                                                                | Male gender: 51.1%<br>Hypertension: 13.2%<br>DM: 10.8%              | µmol/L) and small kidneys on imaging without evidence of reversible causes | assessment and Scr measurement                                           | mentioned     | proteinuria >3.5 g/dl                               | <b>prevalence: 37.9%</b>                                         |     |
| M <sup>104</sup>          | Hamdouk<br>2011<br>Sudan<br>East    | hairdressing saloons                                                               | 72 | Hairdressers                                                                                                                                  | Age (years): 40±8<br>Male gender: 0%<br>Hypertension: 19.4%         | Scr level ≥2 mg/dl                                                         | Proteinuria by urinary strip and 24 hrs Scr measurement and renal biopsy | Not mentioned | 26.4% had albuminuria                               | <b>Total prevalence: 26.4%</b><br>14% had Scr ≥2 mg/dl           | Low |
| EL-Safty I <sup>129</sup> | 2003<br>Egypt<br>North              | male workers attending the out-patient clinic of the Health Insurance Organization | 81 | Male workers attending the out-patient clinic of the Health Insurance Organization Workers (29 non-silicotics, 24 silicotics and 28 referent) | Age (years): 39.83±7.27<br>Male gender: 100%<br>Hypertension: 19.4% | Elevated proteinuria                                                       | Assessment of proteinuria quantitatively                                 | Not measured  | 93% among non-silica exposed<br>100% silica exposed | <b>Total prevalence (among those with Silica exposure): 100%</b> | Low |

DM: diabetes mellitus, BMI: body mass index, SBP: systolic blood pressure, DBP: diastolic blood pressure, IDMS: Isotope dilution mass spectrometry, MDRD: Modification of Diet in Renal Disease, CG: Cockcroft Gault, CKD-EPI: Chronic Kidney Disease Epidemiology Collaboration, IQR: inter-quartile range, KDOQI: Kidney Disease Outcome Quality Initiative

## Titles and legends

**Fig. 1** Flow diagram of the study selection

**Fig. 2** Prevalence of CKD among entire general population. Estimates from this figure should be presented with caution as it is bound to be imprecise and inaccurate due to its tentative way of estimation

**Fig. 3** Main causes of CKD

## Supporting information

**S1 Table:** Search strategy adopted in PubMed and Ovid MEDLINE

**S2 Table:** Studies among CKD patients

For peer review only

## REFERENCES

1. Levey AS, Atkins R, Coresh J, et al. Chronic kidney disease as a global public health problem: approaches and initiatives - a position statement from Kidney Disease Improving Global Outcomes. *Kidney international* 2007;72(3):247-59. doi: 10.1038/sj.ki.5002343
2. Zoccali C, Kramer A, Jager KJ. Epidemiology of CKD in Europe: an uncertain scenario. *Nephrology dialysis transplantation* 2010;25(6):1731-33.
3. Global, regional, and national age–sex specific all-cause and cause-specific mortality for 240 causes of death, 1990–2013: a systematic analysis for the Global Burden of Disease Study 2013. *The Lancet* 2015;385(9963):117-71. doi: 10.1016/s0140-6736(14)61682-2
4. Bello AK, Peters J, Rigby J, et al. Socioeconomic status and chronic kidney disease at presentation to a renal service in the United Kingdom. *Clinical journal of the American Society of Nephrology : CJASN* 2008;3(5):1316-23. doi: 10.2215/cjn.00680208 [published Online First: 2008/06/27]
5. El Nahas AM, Bello AK. Chronic kidney disease: the global challenge. *The Lancet* 2005;365(9456):331-40.
6. UN. World Population Prospects: The 2015 Revision, Key Findings and Advance Tables: United Nations 2015 [Available from: [http://esa.un.org/unpd/wpp/publications/files/key\\_findings\\_wpp\\_2015.pdf](http://esa.un.org/unpd/wpp/publications/files/key_findings_wpp_2015.pdf) accessed November 8, 2015
7. Aikins Ad-G, Unwin N, Agyemang C, et al. Commentary Tackling Africa's chronic disease burden: from the local to the global. 2010
8. Organization WH. Global action plan for the prevention and control of noncommunicable diseases 2013-2020. 2013
9. Stanifer JW, Jing B, Tolan S, et al. The epidemiology of chronic kidney disease in sub-Saharan Africa: a systematic review and meta-analysis. *The Lancet Global Health* 2014;2(3):e174-81. doi: [http://dx.doi.org/10.1016/S2214-109X\(14\)70002-6](http://dx.doi.org/10.1016/S2214-109X(14)70002-6)
10. Anothaisintawee T, Rattanasiri S, Ingsathit A, et al. Prevalence of chronic kidney disease: a systematic review and meta-analysis. *Clinical nephrology* 2009;71(3):244-54.
11. Liberati A, Altman DG, Tetzlaff J, et al. The PRISMA statement for reporting systematic reviews and meta-analysis of studies that evaluate health care interventions: explanation and elaboration. *Italian Journal of Public Health* 2012;6(4)
12. Matsha TE, Yako YY, Rensburg MA, et al. Chronic kidney diseases in mixed ancestry south African populations: prevalence, determinants and concordance between kidney function estimators. *BMC nephrology* 2013;14:75. doi: <http://dx.doi.org/10.1186/1471-2369-14-75>
13. Eastwood JB, Kerry SM, Plange-Rhule J, et al. Assessment of GFR by four methods in adults in Ashanti, Ghana: the need for an eGFR equation for lean African populations.[Erratum appears in *Nephrol Dial Transplant*. 2011 Dec;26(12):4153 Note: Emmett, Lynsey [added]; Miller, Michelle A [added]]. *Nephrology Dialysis Transplantation* 2010;25(7):2178-87. doi: <http://dx.doi.org/10.1093/ndt/gfp765>
14. Glaser N, Deckert A, Phiri S, et al. Comparison of Various Equations for Estimating GFR in Malawi: How to Determine Renal Function in Resource Limited Settings? *PloS one* 2015;10(6):e0130453. doi: 10.1371/journal.pone.0130453 [published Online First: 2015/06/18]
15. Juni P, Altman DG, Egger M. Systematic reviews in health care: Assessing the quality of controlled clinical trials. *BMJ (Clinical research ed)* 2001;323(7303):42-6. [published Online First: 2001/07/07]
16. Whiting P, Rutjes AW, Reitsma JB, et al. The development of QUADAS: a tool for the quality assessment of studies of diagnostic accuracy included in systematic reviews. *BMC medical research methodology* 2003;3:25. doi: 10.1186/1471-2288-3-25 [published Online First: 2003/11/11]
17. Shamliyan T, Kane RL, Dickinson S. A systematic review of tools used to assess the quality of observational studies that examine incidence or prevalence and risk factors for diseases. *J Clin Epidemiol* 2010;63(10):1061-70. doi: 10.1016/j.jclinepi.2010.04.014 [published Online First: 2010/08/24]
18. Cohen J. A Coefficient of Agreement for Nominal Scales. *Educational and Psychological Measurement* 1960;20(1):37-46. doi: 10.1177/001316446002000104
19. Ka EF, Cisse MM, Lemrabott AT, et al. [Lupus nephropathy in black patients with systemic lupus erythematosus in Senegal: 43 cases]. *Medecine et sante tropicales* 2013;23(3):328-31. doi: 10.1684/mst.2013.0200 [published Online First: 2013/10/29]
20. Dessein PH, Hsu HC, Tsang L, et al. Kidney function, endothelial activation and atherosclerosis in black and white Africans with rheumatoid arthritis. *PloS one* 2015;10(3):e0121693. doi: 10.1371/journal.pone.0121693 [published Online First: 2015/03/26]
21. Ephraim RK, Osakunor DN, Cudjoe O, et al. Chronic kidney disease is common in sickle cell disease: a cross-sectional study in the Tema Metropolis, Ghana. *BMC nephrology* 2015;16:75. doi: 10.1186/s12882-015-0072-y [published Online First: 2015/05/30]

22. Ghahramani N. Silica nephropathy. *The international journal of occupational and environmental medicine* 2010;1(3 July)
23. Sampathkumar K, Yesudas S. Hair dye poisoning and the developing world. *Journal of emergencies, trauma and shock* 2009;2(2):129.
24. Elsharif ME, Abdullha SM, Abdalla SM, et al. The magnitude of chronic kidney diseases among primary health care attendees in Gezira state, Sudan. *Saudi journal of kidney diseases and transplantation : an official publication of the Saudi Center for Organ Transplantation, Saudi Arabia* 2013;24(4):807-9. [published Online First: 2013/07/03]
25. Sumaili EK, Cohen EP, Zinga CV, et al. High prevalence of undiagnosed chronic kidney disease among at-risk population in Kinshasa, the Democratic Republic of Congo. *BMC nephrology* 2009;10:18. doi: 10.1186/1471-2369-10-18 [published Online First: 2009/07/23]
26. Afolabi MO, Abioye-Kuteyi E, Arogundade FA, et al. Prevalence of chronic kidney disease in a Nigerian family practice population. *South African Family Practice* 2009;51(2):132-37.
27. van Rensburg BW, van Staden AM, Rossouw GJ, et al. The profile of adult nephrology patients admitted to the Renal Unit of the Universitas Tertiary Hospital in Bloemfontein, South Africa from 1997 to 2006. *Nephrology Dialysis Transplantation* 2010;25(3):820-4. doi: <http://dx.doi.org/10.1093/ndt/gfp535>
28. Raji Y, Mabayoje O, Bello T. Familial clustering of risk factors for cardiovascular disease among first-degree relatives of patients with chronic kidney disease in a sub-Saharan African population. *Cardiovascular journal of Africa* 2015;26(2 Suppl 1):S11-4. doi: 10.5830/cvja-2015-041 [published Online First: 2015/05/13]
29. The unrecognized prevalence of chronic kidney disease among family members of end stage renal disease patients [IEA-EEF abstract 264]; 2009. *European Journal of Epidemiology*.
30. Anyabolu EN, Chukwuonye, II, Anyabolu AE, et al. A look at risk factors of proteinuria in subjects without impaired renal filtration function in a general population in Owerri, Nigeria. *The Pan African medical journal* 2016;23:257. doi: 10.11604/pamj.2016.23.257.8189 [published Online First: 2016/08/16]
31. El Khayat SS, Hallal K, Gharbi MB, et al. Fate of patients during the first year of dialysis. *Saudi journal of kidney diseases and transplantation : an official publication of the Saudi Center for Organ Transplantation, Saudi Arabia* 2013;24(3):605-9. [published Online First: 2013/05/04]
32. Seck SM, Diallo IM, Diagne SI. Epidemiological patterns of chronic kidney disease in black African elders: a retrospective study in West Africa. *Saudi Journal of Kidney Diseases & Transplantation* 2013;24(5):1068-72.
33. Seck SM, Elhadj FK, Fall S, et al. [Adherence to therapy in sub-Saharan non-dialysed patients with chronic kidney diseases]. *Nephrologie et Therapeutique* 2008;4(5):325-9. doi: <http://dx.doi.org/10.1016/j.nephro.2008.02.004>
34. Bourquia A. [Autosomal dominant polycystic kidney disease (ADPKD) in Morocco. Multicenter study about 308 families]. *Nephrologie* 2002;23(2):93-6. [published Online First: 2002/05/16]
35. Ouattara B, Kra O, Yao H, et al. [Characteristics of chronic renal failure in black adult patients hospitalized in the Internal Medicine department of Treichville University Hospital]. *Nephrologie et Therapeutique* 2011;7(7):531-4. doi: <http://dx.doi.org/10.1016/j.nephro.2011.03.009>
36. Lengani A, Coulibaly G, Laville M, et al. [Epidemiology of severe chronic renal insufficiency in Burkina Faso]. *Sante (Montrouge, France)* 1997;7(6):379-83. [published Online First: 1998/03/21]
37. Afifi AM, Mady GE, Ahmad AA, et al. Pattern of renal diseases among elderly Egyptians patients with acute or chronic renal diseases in Ain Shams University and Nasser Institute Hospitals, Cairo, Egypt. *Journal of the Egyptian Society of Parasitology* 2005;35(3):911-24. [published Online First: 2005/12/13]
38. Diouf B, Ka EF, Niang A, et al. [Etiologies of chronic renal insufficiency in a adult internal medicine service in Dakar]. *Dakar medical* 2000;45(1):62-5. [published Online First: 2003/12/12]
39. Niang A, Dial C, Ka EF, et al. [Nephrotic syndrom with focal and segmental glomerulosclerosis in Dakar: epidemiological and clinicopathological characteristics (about 134 cases)]. *Dakar medical* 2008;53(1):45-51. [published Online First: 2008/12/24]
40. Sabi KA, Gnionsahe DA, Amedegnato D. [Chronic kidney failure in Togo: clinical, laboratory, and etiological aspects]. *Medecine tropicale : revue du Corps de sante colonial* 2011;71(1):74-6. [published Online First: 2011/05/19]
41. Ulasi II, Ijoma CK. The enormity of chronic kidney disease in Nigeria: the situation in a teaching hospital in South-East Nigeria. *Journal of tropical medicine* 2010;2010
42. Abderrahim E, Zouaghi K, Hedri H, et al. Renal replacement therapy for diabetic end-stage renal disease. Experience of a Tunisian hospital centre. *Diabetes & metabolism* 2001;27(5 Pt 1):584-90.
43. Abdou N, Boucar D, El Hadj Fary KA, et al. Histopathological profiles of nephropathies in senegal. *Saudi journal of kidney diseases and transplantation : an official publication of the Saudi Center for Organ Transplantation, Saudi Arabia* 2003;14(2):212-4. [published Online First: 2008/01/23]
44. Afifi A, El Setouhy M, El Sharkawy M, et al. Diabetic nephropathy as a cause of end-stage renal disease in Egypt: a six-year study. *Eastern Mediterranean health journal = La revue de sante de la Mediterranee orientale = al-Majallah al-sihhiyah li-sharq al-mutawassit* 2004;10(4-5):620-6. [published Online First: 2005/12/13]
45. Afifi A, Karim MA. Renal replacement therapy in Egypt: first annual report of the Egyptian Society of Nephrology, 1996. *Eastern Mediterranean health journal = La revue de sante de la Mediterranee orientale = al-Majallah al-sihhiyah li-sharq al-mutawassit* 1999;5(5):1023-9. [published Online First: 2000/09/13]

- 1  
2  
3 46. Agaba EI, Wigwe CM, Agaba PA, et al. Performance of the Cockcroft-Gault and MDRD equations in adult  
4 Nigerians with chronic kidney disease. *International urology and nephrology* 2009;41(3):635-42. doi:  
5 10.1007/s11255-008-9515-8 [published Online First: 2009/01/13]
- 6 47. Alashek WA, McIntyre CW, Taal MW. Epidemiology and aetiology of dialysis-treated end-stage kidney disease in  
7 Libya. *BMC nephrology* 2012;13:33. doi: 10.1186/1471-2369-13-33 [published Online First: 2012/06/12]
- 8 48. Alasia DD, Emem-Chioma P, Wokoma FS. A single-center 7-year experience with end-stage renal disease care in  
9 Nigeria-a surrogate for the poor state of ESRD care in Nigeria and other sub-saharan african countries:  
10 advocacy for a global fund for ESRD care program in sub-saharan african countries. *Int J Nephrol*  
11 2012;2012:639653. doi: <http://dx.doi.org/10.1155/2012/639653>
- 12 49. Alebiosu CO, Ayodele OO, Abbas A, et al. Chronic renal failure at the Olabisi Onabanjo University Teaching  
13 Hospital, Sagamu, Nigeria. *African health sciences* 2006;6(3):132-8. doi: 10.5555/afhs.2006.6.3.132  
14 [published Online First: 2006/12/05]
- 15 50. Amira CO, Braimoh RW, Bello BT. Pattern of intradialytic complications at the Lagos University Teaching  
16 Hospital. *African journal of medicine and medical sciences* 2012;41(4):411-6. [published Online First:  
17 2013/05/16]
- 18 51. Arogundade FA, Sanusi AA, Hassan MO, et al. The pattern, clinical characteristics and outcome of ESRD in Ile-Ife,  
19 Nigeria: is there a change in trend? *African health sciences* 2011;11(4):594-601. [published Online First:  
20 2012/06/01]
- 21 52. Counil E, Cherni N, Kharrat M, et al. Trends of incident dialysis patients in Tunisia between 1992 and 2001.  
22 *American journal of kidney diseases : the official journal of the National Kidney Foundation* 2008;51(3):463-  
23 70. doi: 10.1053/j.ajkd.2007.10.032 [published Online First: 2008/02/26]
- 24 53. Chijioke A, Makusidi AM, Kolo PM. Electrocardiographic abnormalities among dialysis naive chronic kidney  
25 disease patients in Ilorin Nigeria. *Annals of African medicine* 2012;11(1):21-6. doi: 10.4103/1596-3519.91011  
26 [published Online First: 2011/12/27]
- 27 54. Madala ND, Thusi GP, Assounga AG, et al. Characteristics of South African patients presenting with kidney disease  
28 in rural KwaZulu-Natal: a cross sectional study. *BMC nephrology* 2014;15:61. doi:  
29 <http://dx.doi.org/10.1186/1471-2369-15-61>
- 30 55. Okpechi IG, Ayodele OE, Rayner BL, et al. Kidney disease in elderly South Africans. *Clinical nephrology*  
31 2013;79(4):269-76. doi: <http://dx.doi.org/10.5414/CN107746>
- 32 56. Laleye A, Awede B, Agboton B, et al. Autosomal dominant polycystic kidney disease in University Clinic of  
33 Nephrology and Haemodialysis of Cotonou: clinical and genetical findings. *Genetic Counseling*  
34 2012;23(4):435-45.
- 35 57. Okunola Y, Ayodele O, Akinwusi P, et al. Haemodialysis practice in a resource-limited setting in the tropics. *Ghana*  
36 *medical journal* 2013;47(1):4-9. [published Online First: 2013/05/11]
- 37 58. Bello BT, Raji YR, Sanusi I, et al. Challenges of providing maintenance hemodialysis in a resource poor country:  
38 Experience from a single teaching hospital in Lagos, Southwest Nigeria. *Hemodialysis international*  
39 *International Symposium on Home Hemodialysis* 2013;17(3):427-33. doi: 10.1111/hdi.12024 [published  
40 Online First: 2013/02/05]
- 41 59. El Minshawy O. End-stage renal disease in the El-Minia Governorate, upper Egypt: an epidemiological study. *Saudi*  
42 *journal of kidney diseases and transplantation : an official publication of the Saudi Center for Organ*  
43 *Transplantation, Saudi Arabia* 2011;22(5):1048-54. [published Online First: 2011/09/14]
- 44 60. Okpechi IG, Rayner BL, Swanepoel CR. Nephrotic syndrome in adult black South Africans: HIV-associated  
45 nephropathy as the main culprit. *Journal of the National Medical Association* 2010;102(12):1193-7.
- 46 61. Madala ND, Nkwanyana N, Dubula T, et al. Predictive performance of eGFR equations in South Africans of  
47 African and Indian ancestry compared with 99mTc-DTPA imaging. *International Urology & Nephrology*  
48 2012;44(3):847-55. doi: <http://dx.doi.org/10.1007/s11255-011-9928-7>
- 49 62. El Farouki MR, Bahadi A, Hamzi MA, et al. [Profile of chronic renal failure in diabetes at initiation of hemodialysis  
50 in the nephrology and dialysis service of the military hospital in Rabat, Morocco]. *The Pan African medical*  
51 *journal* 2013;15:124. doi: 10.11604/pamj.2013.15.124.2252 [published Online First: 2013/11/21]
- 52 63. Okpechi I, Swanepoel C, Duffield M, et al. Patterns of renal disease in Cape Town South Africa: a 10-year review  
53 of a single-centre renal biopsy database. *Nephrology Dialysis Transplantation* 2011;26(6):1853-61. doi:  
54 <http://dx.doi.org/10.1093/ndt/gfq655>
- 55 64. Niang A, Cisse MM, Mahmoud SM, et al. Pilot experience in senegal with peritoneal dialysis for end-stage renal  
56 disease. *Peritoneal Dialysis International* 2014;34(5):539-43. doi: <http://dx.doi.org/10.3747/pdi.2011.00327>
- 57 65. Buargub MA. 5-year mortality in hemodialysis patients: a single center study in Tripoli. *Saudi journal of kidney*  
58 *diseases and transplantation : an official publication of the Saudi Center for Organ Transplantation, Saudi*  
59 *Arabia* 2008;19(2):268-73. [published Online First: 2008/03/04]
- 60 66. Chijioke A, Aderibigbe A, Olarenwaju TO, et al. Prevalence and pattern of cystic kidney diseases in Ilorin, Nigeria.  
61 *Saudi journal of kidney diseases and transplantation : an official publication of the Saudi Center for Organ*  
62 *Transplantation, Saudi Arabia* 2010;21(6):1172-8. [published Online First: 2010/11/10]
- 63 67. Elsharif ME, Elsharif EG. Causes of end-stage renal disease in Sudan: a single-center experience. *Saudi journal of*  
64 *kidney diseases and transplantation : an official publication of the Saudi Center for Organ Transplantation,*

- 1  
2  
3  
4  
5  
6  
7  
8  
9  
10  
11  
12  
13  
14  
15  
16  
17  
18  
19  
20  
21  
22  
23  
24  
25  
26  
27  
28  
29  
30  
31  
32  
33  
34  
35  
36  
37  
38  
39  
40  
41  
42  
43  
44  
45  
46  
47  
48  
49  
50  
51  
52  
53  
54  
55  
56  
57  
58  
59  
60
- Saudi Arabia* 2011;22(2):373-6. [published Online First: 2011/03/23]
68. Elkhatib M, Elnahed MS, Fadda S, et al. The change in the spectrum of glomerulonephritis in Egypt over the past decade. *Saudi journal of kidney diseases and transplantation : an official publication of the Saudi Center for Organ Transplantation, Saudi Arabia* 2012;23(5):1065-7. doi: 10.4103/1319-2442.100955 [published Online First: 2012/09/18]
69. Ibrahim S, Fayed A, Fadda S, et al. A five-year analysis of the incidence of glomerulonephritis at Cairo University Hospital-Egypt. *Saudi journal of kidney diseases and transplantation : an official publication of the Saudi Center for Organ Transplantation, Saudi Arabia* 2012;23(4):866-70. doi: 10.4103/1319-2442.98191 [published Online First: 2012/07/19]
70. Ayach G, El-Filali H, Saidi S, et al. Histopathological study of pure primary nephrotic syndrome in adolescents and young Moroccan adults. *Arab journal of nephrology and transplantation* 2011;4(3):137-40. [published Online First: 2011/10/27]
71. Ramilitiana B, Ranivoharisoa EM, Dodo M, et al. [A retrospective study on the incidence of chronic renal failure in the Department of Internal Medicine and Nephrology at University Hospital of Antananarivo (the capital city of Madagascar)]. *The Pan African medical journal* 2016;23:141. doi: 10.11604/pamj.2016.23.141.8874 [published Online First: 2016/06/10]
72. Zajjari Y, Benyahia M, Ibrahim DM, et al. La néphropathie non diabétique chez les patients diabétiques de type 2 à l'hôpital militaire Mohammed V de Rabat (Maroc). *EMHJ* 2012;18(6)
73. Fatiu A, Abubakr S, Muzamil H, et al. Undiagnosed hypertension and proteinuria in a market population in Ile-Ife, Nigeria. *Arab journal of nephrology and transplantation* 2011;4(3):141-6. [published Online First: 2011/10/27]
74. Traore M, Traore HA, Kardorff R, et al. The public health significance of urinary schistosomiasis as a cause of morbidity in two districts in Mali. *The American journal of tropical medicine and hygiene* 1998;59(3):407-13. [published Online First: 1998/09/28]
75. Sumaili EK, Nseka NM, Lepira FB, et al. Screening for proteinuria and chronic kidney disease risk factors in Kinshasa: a World Kidney Day 2007 study. *Nephron Clinical practice* 2008;110(4):c220-8. doi: 10.1159/000167869 [published Online First: 2008/11/01]
76. Egbi OG, Okafor UH, Miebodei KE, et al. Prevalence and correlates of chronic kidney disease among civil servants in Bayelsa state, Nigeria. *Nigerian journal of clinical practice* 2014;17(5):602-7. doi: <http://dx.doi.org/10.4103/1119-3077.141426>
77. Ayodele OE, Okunola OO, Afolabi MO, et al. Prevalence of hypertension, diabetes and chronic kidney disease in participants of the 2009 World Kidney Day screening exercise in Southwest Nigeria. *Hong Kong Journal of Nephrology* 2011;13(2):55-63.
78. Abu-Aisha H, Elhassan A, Khamis A, et al. Chronic kidney disease in police forces households in Khartoum, Sudan: pilot report. *Arab journal of nephrology and transplantation* 2009;2(2):21-26.
79. Cailhol J, Nkurunziza B, Izzedine H, et al. Prevalence of chronic kidney disease among people living with HIV/AIDS in Burundi: a cross-sectional study. *BMC nephrology* 2011;12:40. doi: <http://dx.doi.org/10.1186/1471-2369-12-40>
80. Wools-Kaloustian K, Gupta SK, Muloma E, et al. Renal disease in an antiretroviral-naïve HIV-infected outpatient population in Western Kenya. *Nephrology Dialysis Transplantation* 2007;22(8):2208-12.
81. Emem CP, Arogundade F, Sanusi A, et al. Renal disease in HIV-seropositive patients in Nigeria: an assessment of prevalence, clinical features and risk factors. *Nephrology, dialysis, transplantation : official publication of the European Dialysis and Transplant Association - European Renal Association* 2008;23(2):741-6. doi: 10.1093/ndt/gfm836 [published Online First: 2007/12/11]
82. Wyatt CM, Shi Q, Novak JE, et al. Prevalence of kidney disease in HIV-infected and uninfected Rwandan women. *PLoS ONE [Electronic Resource]* 2011;6(3):e18352. doi: <http://dx.doi.org/10.1371/journal.pone.0018352>
83. FolefackKaze F, Kengne AP, Pefura Yone EW, et al. Renal function, urinalysis abnormalities and correlates among HIV-infected Cameroonians naïve to antiretroviral therapy. *Saudi Journal of Kidney Diseases & Transplantation* 2013;24(6):1291-7. doi: <http://dx.doi.org/10.4103/1319-2442.121280>
84. Struik GM, den Exter RA, Munthali C, et al. The prevalence of renal impairment among adults with early HIV disease in Blantyre, Malawi. *International journal of STD & AIDS* 2011;22(8):457-62. doi: 10.1258/ijsa.2011.010521 [published Online First: 2011/07/29]
85. Msango L, Downs JA, Kalluvya SE, et al. Renal dysfunction among HIV-infected patients starting antiretroviral therapy. *AIDS (London, England)* 2011;25(11):1421-5. doi: <http://dx.doi.org/10.1097/QAD.0b013e328348a4b1>
86. Janmohamed MN, Kalluvya SE, Mueller A, et al. Prevalence of chronic kidney disease in diabetic adult out-patients in Tanzania. *BMC nephrology* 2013;14(1):183.
87. Wanjohi FW, Otieno FC, Ogola EN, et al. Nephropathy in patients with recently diagnosed type 2 diabetes mellitus in black Africans. *East African medical journal* 2002;79(8):399-404. [published Online First: 2003/03/18]
88. Choukem SP, Dzudie A, Dehayem M, et al. Comparison of different blood pressure indices for the prediction of prevalent diabetic nephropathy in a sub-Saharan African population with type 2 diabetes. *The Pan African medical journal* 2012;11:67. [published Online First: 2012/06/02]

- 1  
2  
3 89. Plange-Rhule J, Phillips R, Acheampong JW, et al. Hypertension and renal failure in Kumasi, Ghana. *Journal of human hypertension* 1999;13(1):37-40.
- 4  
5 90. Kalyesubula R, Nankabirwa JI, Ssinabulya I, et al. Kidney disease in Uganda: a community based study. *BMC nephrology* 2017;18(1):116. doi: 10.1186/s12882-017-0521-x [published Online First: 2017/04/05]
- 6  
7 91. Kaze FF, Halle MP, Mopa HT, et al. Prevalence and risk factors of chronic kidney disease in urban adult Cameroonians according to three common estimators of the glomerular filtration rate: a cross-sectional study. *BMC nephrology* 2015;16:96. doi: 10.1186/s12882-015-0102-9 [published Online First: 2015/07/08]
- 8  
9 92. Lunyera J, Stanifer JW, Ingabire P, et al. Prevalence and correlates of proteinuria in Kampala, Uganda: a cross-sectional pilot study. *BMC research notes* 2016;9:97. doi: 10.1186/s13104-016-1897-6 [published Online First: 2016/02/18]
- 10  
11 93. Wachukwu CM, Emem-Chioma PC, Wokoma FS, et al. Prevalence of risk factors for chronic kidney disease among adults in a university community in southern Nigeria. *The Pan African medical journal* 2015;21:120. doi: 10.11604/pamj.2015.21.120.7079 [published Online First: 2015/09/04]
- 12  
13 94. Odongo P, Wanyama R, Obol JH, et al. Impaired renal function and associated risk factors in newly diagnosed HIV-infected adults in Gulu Hospital, Northern Uganda. *BMC nephrology* 2015;16:43. doi: 10.1186/s12882-015-0035-3 [published Online First: 2015/04/17]
- 14  
15 95. Feteh VF, Choukem SP, Kengne AP, et al. Anemia in type 2 diabetic patients and correlation with kidney function in a tertiary care sub-Saharan African hospital: a cross-sectional study. *BMC nephrology* 2016;17:29. doi: 10.1186/s12882-016-0247-1 [published Online First: 2016/03/21]
- 16  
17 96. Pillay S, Aldous C, Mahomed F. A deadly combination - HIV and diabetes mellitus: Where are we now? *South African medical journal = Suid-Afrikaanse tydskrif vir geneeskunde* 2016;106(4):54. doi: 10.7196/SAMJ.2016.v106i4.9950 [published Online First: 2016/04/02]
- 18  
19 97. Seck SM, Doupa D, Gueye L, et al. Chronic kidney disease epidemiology in northern Senegal: a cross-sectional study. *Iranian journal of kidney diseases* 2014;8(4):286-91.
- 20  
21 98. Sumaili EK, Krzesinski JM, Zinga CV, et al. Prevalence of chronic kidney disease in Kinshasa: results of a pilot study from the Democratic Republic of Congo. *Nephrology Dialysis Transplantation* 2009;24(1):117-22. doi: <http://dx.doi.org/10.1093/ndt/gfn469>
- 22  
23 99. Longo AL, Lepira FB, Sumaili EK, et al. Prevalence of low estimated glomerular filtration rate, proteinuria, and associated risk factors among HIV-infected black patients using Cockcroft-Gault and modification of diet in renal disease study equations. *Journal of Acquired Immune Deficiency Syndromes: JAIDS* 2012;59(1):59-64. doi: <http://dx.doi.org/10.1097/QAI.0b013e31823587b0>
- 24  
25 100. Fana GT, Ndhlovu CE. Renal dysfunction among anti-retroviral therapy naive HIV infected patients in Zimbabwe. *The Central African journal of medicine* 2011;57(1-4):1-5. [published Online First: 2011/01/01]
- 26  
27 101. Han TM, Naicker S, Ramdial PK, et al. A cross-sectional study of HIV-seropositive patients with varying degrees of proteinuria in South Africa. *Kidney international* 2006;69(12):2243-50.
- 28  
29 102. Balogun WO, Abbiyesuku FM. Excess renal insufficiency among type 2 diabetic patients with dip-stick positive proteinuria in a tertiary hospital. *African journal of medicine and medical sciences* 2011;40(4):399-403. [published Online First: 2012/07/13]
- 30  
31 103. Mafundikwa A, Ndhlovu CE, Gomo Z. The prevalence of diabetic nephropathy in adult patients with insulin dependent diabetes mellitus attending Parirenyatwa Diabetic Clinic, Harare. *The Central African journal of medicine* 2007;53(1-4):1-6. [published Online First: 2007/01/01]
- 32  
33 104. Hamdouk M, Abdelraheem M, Taha A, et al. The association between prolonged occupational exposure to paraphenylenediamine (hair-dye) and renal impairment. *Arab journal of nephrology and transplantation* 2011;4(1):21-5. [published Online First: 2011/04/08]
- 34  
35 105. Oluyombo R, Ayodele OE, Akinwusi PO, et al. A community study of the prevalence, risk factors and pattern of chronic kidney disease in osun state, South west Nigeria. *West African journal of medicine* 2013;32(2):85-92.
- 36  
37 106. Prevalence of Chronic Kidney Disease and Associated Risk Factors: First Results from a Population Based Screening Program in Morocco(MAREMAR) [ASN abstract 353]; 2012. *J Am Soc Nephrol*.
- 38  
39 107. Masimango MI, Sumaili EK, Jadoul M, et al. Prevalence of microalbuminuria and diagnostic value of dipstick proteinuria in outpatients from HIV clinics in Bukavu, the Democratic Republic of Congo. *BMC nephrology* 2014;15(1):146. doi: 10.1186/1471-2369-15-146 [published Online First: 2014/09/06]
- 40  
41 108. Fabian J, Naicker S, Venter WD, et al. Urinary screening abnormalities in antiretroviral-naive HIV-infected outpatients and implications for management--a single-center study in South Africa. *Ethnicity & disease* 2009;19(1 Suppl 1):S1-80-5.
- 42  
43 109. Sarfo FS, Keegan R, Appiah L, et al. High prevalence of renal dysfunction and association with risk of death amongst HIV-infected Ghanaians. *The Journal of infection* 2013;67(1):43-50. doi: 10.1016/j.jinf.2013.03.008 [published Online First: 2013/04/02]
- 44  
45 110. Jao J, Palmer D, Leus I, et al. Prevalence and predictors of proteinuria in HIV-infected and uninfected pregnant women in Cameroon. *Nephrology, dialysis, transplantation : official publication of the European Dialysis and Transplant Association - European Renal Association* 2011;26(9):3051-3. doi: 10.1093/ndt/gfr310 [published Online First: 2011/07/02]
- 46  
47 111. Makulo Jr R, Nseka MN, Jadoul M, et al. Albuminurie pathologique lors du dépistage du diabète en milieu semi-
- 48  
49  
50  
51  
52  
53  
54  
55  
56  
57  
58  
59  
60

- rural (cité de Kisantu en RD Congo). *Nephrologie & thérapeutique* 2010;6(6):513-19.
112. Kaze FF, Kengne AP, Magatsing CT, et al. Prevalence and Determinants of Chronic Kidney Disease Among Hypertensive Cameroonians According to Three Common Estimators of the Glomerular Filtration Rate. *Journal of clinical hypertension (Greenwich, Conn)* 2016;18(5):408-14. doi: 10.1111/jch.12781 [published Online First: 2016/01/23]
113. Ayokunle DS, Olusegun OT, Ademola A, et al. Prevalence of chronic kidney disease in newly diagnosed patients with Human immunodeficiency virus in Ilorin, Nigeria. *Jornal brasileiro de nefrologia : 'orgao oficial de Sociedades Brasileira e Latino-Americana de Nefrologia* 2015;37(2):177-84. doi: 10.5935/0101-2800.20150029 [published Online First: 2015/07/15]
114. Chadwick DR, Sarfo FS, Kirk ES, et al. Tenofovir is associated with increased tubular proteinuria and asymptomatic renal tubular dysfunction in Ghana. *BMC nephrology* 2015;16:195. doi: 10.1186/s12882-015-0192-4 [published Online First: 2015/12/03]
115. Glaser N, Phiri S, Bruckner T, et al. The prevalence of renal impairment in individuals seeking HIV testing in Urban Malawi. *BMC nephrology* 2016;17(1):186. doi: 10.1186/s12882-016-0403-7 [published Online First: 2016/11/24]
116. Pruijm MT, Madeleine G, Riesen WF, et al. Prevalence of microalbuminuria in the general population of Seychelles and strong association with diabetes and hypertension independent of renal markers. *Journal of hypertension* 2008;26(5):871-7. doi: <http://dx.doi.org/10.1097/HJH.0b013e3282f624d9>
117. Gouda Z, Mashaal G, Bello A, et al. Egypt information, prevention, and treatment of chronic kidney disease (EGIPT-CKD) programme: Prevalence and risk factors for microalbuminuria among the relatives of patients with CKD in Egypt. *Saudi Journal of Kidney Diseases and Transplantation* 2011;22(5):1055.
118. Attolou V, Bigot A, Ayivi B, et al. [Renal complications associated with human acquired immunodeficiency virus infection in a population of hospital patients at the Hospital and University National Center in Cotonou]. *Sante (Montrouge, France)* 1998;8(4):283-6. [published Online First: 1998/10/30]
119. Bouzid C, Smida H, Kacem A, et al. [Renal failure in Tunisian patients with type 2 diabetes: frequency and related factors]. *La Tunisie medicale* 2011;89(1):10-5. [published Online First: 2011/01/27]
120. Keeton GR, Smit R, Bryer A. Renal outcome of type 2 diabetes in South Africa--a 12-year follow-up study. *South African Medical Journal* 2004;94(9):771-5.
121. Bouaziz A, Zidi I, Zidi N, et al. Nephropathy following type 2 diabetes mellitus in Tunisian population. *The West Indian medical journal* 2012;61(9):881-9. [published Online First: 2013/09/12]
122. Katchunga P, Hermans MP, Manwa B, et al. [Hypertension, insulin resistance and chronic kidney disease in type 2 diabetes patients from South Kivu, DR Congo]. *Nephrologie et Therapeutique* 2010;6(6):520-5. doi: <http://dx.doi.org/10.1016/j.nephro.2010.04.002>
123. Djrolo F, Attolou VG, Avode DG, et al. [Diabetic nephropathy: an epidemiological study based on proteinuria in a population of black African diabetics in Cotonou, Benin]. *Sante (Montrouge, France)* 2001;11(2):105-9.
124. Lutale JJ, Thordarson H, Abbas ZG, et al. Microalbuminuria among type 1 and type 2 diabetic patients of African origin in Dar Es Salaam, Tanzania. *BMC nephrology* 2007;8(1):2.
125. Gill G, Gebrekidan A, English P, et al. Diabetic complications and glycaemic control in remote North Africa. *QJM : monthly journal of the Association of Physicians* 2008;101(10):793-98.
126. Osafo C, Mate-Kole M, Afram K, et al. Prevalence of chronic kidney disease in hypertensive patients in Ghana. *Renal failure* 2011;33(4):388-92. doi: <http://dx.doi.org/10.3109/0886022X.2011.565140>
127. Lengani A, Samadoulougou A, Cisse M. [Characteristics of renal disease in hypertensive morbidities in adults in Burkina Faso]. *Archives des maladies du coeur et des vaisseaux* 2000;93(8):1053-7.
128. Rayner B, Becker P. The prevalence of microalbuminuria and ECG left ventricular hypertrophy in hypertensive patients in private practices in South Africa. *Cardiovascular Journal of Southern Africa* 2006;17(5):245-9.
129. IA EL-S, Gadallah M, Shouman AE, et al. Subclinical nephrotoxicity caused by smoking and occupational silica exposure among Egyptian industrial workers. *Archives of medical research* 2003;34(5):415-21. doi: 10.1016/s0188-4409(03)00077-8 [published Online First: 2003/11/07]
130. Laurence EC, Volmink J, Esterhuizen TM, et al. Risk of cardiovascular disease among teachers in Cape Town: Findings of the South African PaCT pilot study. *South African medical journal = Suid-Afrikaanse tydskrif vir geneeskunde* 2016;106(10):996-1001. doi: 10.7196/SAMJ.2016.v106i10.10869 [published Online First: 2016/10/12]
131. Mogueo A, Echouffo-Tcheugui JB, Matsha TE, et al. Validation of two prediction models of undiagnosed chronic kidney disease in mixed-ancestry South Africans. *BMC nephrology* 2015;16:94. doi: 10.1186/s12882-015-0093-6 [published Online First: 2015/07/05]
132. Stanifer JW, Egger JR, Turner EL, et al. Neighborhood clustering of non-communicable diseases: results from a community-based study in Northern Tanzania. *BMC public health* 2016;16:226. doi: 10.1186/s12889-016-2912-5 [published Online First: 2016/03/06]
133. Stanifer JW, Maro V, Egger J, et al. The epidemiology of chronic kidney disease in Northern Tanzania: a population-based survey. *PLoS one* 2015;10(4):e0124506. doi: 10.1371/journal.pone.0124506 [published Online First: 2015/04/18]
134. Stanifer JW, Turner EL, Egger JR, et al. Knowledge, Attitudes, and Practices Associated with Chronic Kidney



- Disease in Northern Tanzania: A Community-Based Study. *PloS one* 2016;11(6):e0156336. doi: 10.1371/journal.pone.0156336 [published Online First: 2016/06/10]
135. Anyabolu EN, Chukwuonye, II, Arodiwe E, et al. Prevalence and predictors of chronic kidney disease in newly diagnosed human immunodeficiency virus patients in Owerri, Nigeria. *Indian journal of nephrology* 2016;26(1):10-5. doi: 10.4103/0971-4065.156115 [published Online First: 2016/03/05]
136. Okafor UH, Unuigbo EI, Chukwuonye E. Prevalence and clinical and laboratory characteristics of kidney disease in anti-retroviral-naive human immunodeficiency virus-infected patients in South-South Nigeria. *Saudi journal of kidney diseases and transplantation : an official publication of the Saudi Center for Organ Transplantation, Saudi Arabia* 2016;27(1):129-34. doi: 10.4103/1319-2442.174155 [published Online First: 2016/01/21]
137. Wensink GE, Schoffelen AF, Tempelman HA, et al. Albuminuria Is Associated with Traditional Cardiovascular Risk Factors and Viral Load in HIV-Infected Patients in Rural South Africa. *PloS one* 2015;10(8):e0136529. doi: 10.1371/journal.pone.0136529 [published Online First: 2015/08/27]
138. Eghan BA, Jr., Frempong MT, Adjei-Poku M. Prevalence and predictors of microalbuminuria in patients with diabetes mellitus: a cross-sectional observational study in Kumasi, Ghana. *Ethnicity & disease* 2007;17(4):726-30. [published Online First: 2007/12/13]
139. Aryee C, Owiredu WK, Osei-Yeboah J, et al. An Analysis of Anthropometric Indicators and Modifiable Lifestyle Parameters Associated with Hypertensive Nephropathy. *International journal of hypertension* 2016;2016:6598921. doi: 10.1155/2016/6598921 [published Online First: 2016/10/25]
140. Nabbaale J, Kibirige D, Ssekasanvu E, et al. Microalbuminuria and left ventricular hypertrophy among newly diagnosed black African hypertensive patients: a cross sectional study from a tertiary hospital in Uganda. *BMC research notes* 2015;8:198. doi: 10.1186/s13104-015-1156-2 [published Online First: 2015/05/15]
141. Addo J, Smeeth L, Leon DA. Hypertensive target organ damage in Ghanaian civil servants with hypertension. *PloS one* 2009;4(8):e6672. doi: 10.1371/journal.pone.0006672 [published Online First: 2009/08/25]
142. Owiredu WK, Quaye L, Amidu N, et al. Renal insufficiency in Ghanaian HIV infected patients: need for dose adjustment. *African health sciences* 2013;13(1):101-11. doi: <http://dx.doi.org/10.4314/ahs.v13i1.14>
143. Stöhr W, Reid A, Walker AS, et al. Glomerular dysfunction and associated risk factors over 4-5 years following antiretroviral therapy initiation in Africa. *Antiviral therapy* 2011;16(7):1011-20. doi: <http://dx.doi.org/10.3851/IMP1832>
144. Stöhr W, Walker AS, Munderi P, et al. Estimating glomerular filtration rate in HIV-infected adults in Africa: comparison of Cockcroft-Gault and Modification of Diet in Renal Disease formulae. *Antiviral therapy* 2008;13(6):761-70. [published Online First: 2008/10/09]
145. Reid A, Stöhr W, Walker AS, et al. Severe renal dysfunction and risk factors associated with renal impairment in HIV-infected adults in Africa initiating antiretroviral therapy. *Clinical Infectious Diseases* 2008;46(8):1271-81. doi: <http://dx.doi.org/10.1086/533468>
146. Ekat MH, Courpotin C, Diafouka M, et al. [Prevalence and factors associated with renal disease among patients with newly diagnoses of HIV in Brazzaville, Republic of Congo]. *Medecine et sante tropicales* 2013;23(2):176-80. doi: 10.1684/mst.2013.0170 [published Online First: 2013/06/22]
147. Peters PJ, Moore DM, Mermin J, et al. Antiretroviral therapy improves renal function among HIV-infected Ugandans. *Kidney international* 2008;74(7):925-9. doi: 10.1038/ki.2008.305 [published Online First: 2008/07/11]
148. Peck R, Baisley K, Kavishe B, et al. Decreased renal function and associated factors in cities, towns and rural areas of Tanzania: a community-based population survey. *Tropical medicine & international health : TM & IH* 2016;21(3):393-404. doi: 10.1111/tmi.12651 [published Online First: 2015/12/09]
149. Nsagha DS, Pokam BT, Assob JC, et al. HAART, DOTS and renal disease of patients co-infected with HIV/AIDS and TB in the South West Region of Cameroon. *BMC public health* 2015;15:1040. doi: 10.1186/s12889-015-2331-z [published Online First: 2015/10/11]
150. Mekuria Y, Yilma D, Mekonnen Z, et al. Renal Function Impairment and Associated Factors among HAART Naive and Experienced Adult HIV Positive Individuals in Southwest Ethiopia: A Comparative Cross Sectional Study. *PloS one* 2016;11(8):e0161180. doi: 10.1371/journal.pone.0161180 [published Online First: 2016/08/19]
151. Adebamowo SN, Adeyemo AA, Tekola-Ayele F, et al. Impact of Type 2 Diabetes on Impaired Kidney Function in Sub-Saharan African Populations. *Frontiers in endocrinology* 2016;7:50. doi: 10.3389/fendo.2016.00050 [published Online First: 2016/06/16]
152. Fiseha T, Kassim M, Yemane T. Chronic kidney disease and underdiagnosis of renal insufficiency among diabetic patients attending a hospital in Southern Ethiopia. *BMC nephrology* 2014;15:198. doi: 10.1186/1471-2369-15-198 [published Online First: 2014/12/17]
153. Odenigbo C, Oguejiofor O, Onwubuya E, et al. The prevalence of chronic kidney disease in apparently healthy retired subjects in asaba, Nigeria. *Annals of medical and health sciences research* 2014;4(Suppl 2):S128-32. doi: 10.4103/2141-9248.138031
154. Lucas GM, Clarke W, Kagaayi J, et al. Decreased kidney function in a community-based cohort of HIV-Infected and HIV-negative individuals in Rakai, Uganda. *Journal of Acquired Immune Deficiency Syndromes: JAIDS* 2010;55(4):491-4. doi: <http://dx.doi.org/10.1097/QAI.0b013e3181e8d5a8>

- 1  
2  
3 155. Booyens HL, Woodiwiss AJ, Raymond A, et al. Chronic kidney disease epidemiology collaboration-derived  
4 glomerular filtration rate performs better at detecting preclinical end-organ changes than alternative equations  
5 in black Africans. *Journal of hypertension* 2016;34(6):1178-85. doi: 10.1097/hjh.0000000000000924  
6 [published Online First: 2016/04/02]
- 7 156. Seape T, Gounden V, van Deventer HE, et al. Cystatin C- and creatinine-based equations in the assessment of  
8 renal function in HIV-positive patients prior to commencing Highly Active Antiretroviral Therapy. *Annals of  
9 clinical biochemistry* 2016;53(Pt 1):58-66. doi: 10.1177/0004563215579695 [published Online First:  
10 2015/03/15]
- 11 157. Zachor H, Machekano R, Estrella MM, et al. Incidence of stage 3 chronic kidney disease and progression on  
12 tenofovir-based regimens. *AIDS (London, England)* 2016;30(8):1221-8. doi: 10.1097/qad.0000000000001041  
13 [published Online First: 2016/02/03]
- 14 158. Adedeji TA, Adedeji NO, Adebisi SA, et al. Prevalence and Pattern of Chronic Kidney Disease in Antiretroviral-  
15 Naive Patients with HIV/AIDS. *Journal of the International Association of Providers of AIDS Care*  
16 2015;14(5):434-40. doi: 10.1177/2325957415587570 [published Online First: 2015/05/28]
- 17 159. Matsha TE, Soita DJ, Hassan SM, et al. Deterioration, improvement of kidney function over time and determinants  
18 in the Cape Town Bellville South cohort. *Nephrology (Carlton, Vic)* 2014;19(10):638-47. doi:  
19 10.1111/nep.12313 [published Online First: 2014/07/22]
- 20 160. Jao J, Lo W, Toro PL, et al. Factors associated with decreased kidney function in HIV-infected adults enrolled in  
21 the MTCT-Plus Initiative in sub-Saharan Africa. *Journal of Acquired Immune Deficiency Syndromes: JAIDS*  
22 2011;57(1):40-5. doi: <http://dx.doi.org/10.1097/QAI.0b013e31821008eb>
- 23 161. Gupta SK, Ong'or WO, Shen C, et al. Reduced renal function is associated with progression to AIDS but not with  
24 overall mortality in HIV-infected Kenyan adults not initially requiring combination antiretroviral therapy.  
25 *Journal of the International AIDS Society* 2011;14:31. doi: 10.1186/1758-2652-14-31 [published Online First:  
26 2011/06/15]
- 27 162. Myer L, Kamkuemah M, Kaplan R, et al. Low prevalence of renal dysfunction in HIV-infected pregnant women:  
28 implications for guidelines for the prevention of mother-to-child transmission of HIV. *Tropical Medicine &  
29 International Health* 2013;18(11):1400-5. doi: <http://dx.doi.org/10.1111/tmi.12194>
- 30 163. Mulenga LB, Kruse G, Lakhi S, et al. Baseline renal insufficiency and risk of death among HIV-infected adults on  
31 antiretroviral therapy in Lusaka, Zambia. *AIDS (London, England)* 2008;22(14):1821-7. doi:  
32 10.1097/QAD.0b013e328307a051 [published Online First: 2008/08/30]
- 33 164. Ajayi S, Mamven M, Ojji D. eGFR and chronic kidney disease stages among newly diagnosed asymptomatic  
34 hypertensives and diabetics seen in a tertiary health center in Nigeria. *Ethnicity & disease* 2014;24(2):220-5.  
35 [published Online First: 2014/05/09]
- 36 165. Nwankwo EA, Nwankwo B, Mubi B. Prevalence of impaired kidney function in hospitalized hypertensive patients  
37 in Maiduguri, Nigeria. *The Internet Journal of Internal Medicine* 2006;6(1)
- 38 166. Edwards JK, Bygrave H, Van den Bergh R, et al. HIV with non-communicable diseases in primary care in Kibera,  
39 Nairobi, Kenya: characteristics and outcomes 2010-2013. *Transactions of the Royal Society of Tropical  
40 Medicine and Hygiene* 2015;109(7):440-6. doi: 10.1093/trstmh/trv038 [published Online First: 2015/05/23]
- 41 167. Kamkuemah M, Kaplan R, Bekker LG, et al. Renal impairment in HIV-infected patients initiating tenofovir-  
42 containing antiretroviral therapy regimens in a Primary Healthcare Setting in South Africa. *Tropical medicine  
43 & international health : TM & IH* 2015;20(4):518-26. doi: 10.1111/tmi.12446 [published Online First:  
44 2014/12/03]
- 45 168. Levey AS, Coresh J, Balk E, et al. National Kidney Foundation practice guidelines for chronic kidney disease:  
46 evaluation, classification, and stratification. *Annals of internal medicine* 2003;139(2):137-47.
- 47 169. Abdelsatir S, Al-Sofi A, Elamin S, et al. The potential role of nursing students in the implementation of  
48 community-based hypertension screening programs in Sudan. *Arab journal of nephrology and transplantation*  
49 2013;6(1):51-4. [published Online First: 2013/01/04]
- 50 170. Agaba EI, Agaba PA, Sirisena ND, et al. Renal disease in the acquired immunodeficiency syndrome in north  
51 central Nigeria. *Nigerian journal of medicine : journal of the National Association of Resident Doctors of  
52 Nigeria* 2003;12(3):120-5. [published Online First: 2004/01/24]
- 53 171. Coresh J, Astor BC, McQuillan G, et al. Calibration and random variation of the serum creatinine assay as critical  
54 elements of using equations to estimate glomerular filtration rate. *American journal of kidney diseases : the  
55 official journal of the National Kidney Foundation* 2002;39(5):920-9. doi: 10.1053/ajkd.2002.32765  
56 [published Online First: 2002/04/30]
- 57 172. Liu WS, Chung YT, Yang CY, et al. Serum creatinine determined by Jaffe, enzymatic method, and isotope  
58 dilution-liquid chromatography-mass spectrometry in patients under hemodialysis. *Journal of clinical  
59 laboratory analysis* 2012;26(3):206-14. doi: 10.1002/jcla.21495 [published Online First: 2012/05/26]
- 60 173. Drion I, Cobbaert C, Groenier KH, et al. Clinical evaluation of analytical variations in serum creatinine  
measurements: why laboratories should abandon Jaffe techniques. *BMC nephrology* 2012;13(1):133.
174. Bachmann LM, Nilsson G, Bruns DE, et al. State of the art for measurement of urine albumin: comparison of  
routine measurement procedures to isotope dilution tandem mass spectrometry. *Clinical chemistry*  
2014;60(3):471-80. doi: 10.1373/clinchem.2013.210302 [published Online First: 2013/11/28]

- 1  
2  
3 175. Levey AS, Stevens LA. Estimating GFR using the CKD epidemiology collaboration (CKD-EPI) creatinine  
4 equation: more accurate GFR estimates, lower CKD prevalence estimates, and better risk predictions.  
5 *American journal of kidney diseases: the official journal of the National Kidney Foundation* 2010;55(4):622.
- 6 176. Poggio ED, Rule AD. A critical evaluation of chronic kidney disease—should isolated reduced estimated  
7 glomerular filtration rate be considered a ‘disease’? *Nephrology Dialysis Transplantation* 2009;24(3):698-700.
- 8 177. Hill NR, Fatoba ST, Oke JL, et al. Global Prevalence of Chronic Kidney Disease—A Systematic Review and Meta-  
9 Analysis. *PloS one* 2016;11(7):e0158765.
- 10 178. Saran R, Li Y, Robinson B, et al. US Renal Data System 2014 Annual Data Report: Epidemiology of Kidney  
11 Disease in the United States. *American journal of kidney diseases : the official journal of the National Kidney*  
12 *Foundation* 2015;66(1 Suppl 1):Svii, S1-305. doi: 10.1053/j.ajkd.2015.05.001 [published Online First:  
13 2015/06/27]
- 14 179. Bruck K, Stel VS, Gambaro G, et al. CKD Prevalence Varies across the European General Population. *Journal of*  
15 *the American Society of Nephrology : JASN* 2016;27(7):2135-47. doi: 10.1681/asn.2015050542 [published  
16 Online First: 2015/12/25]
- 17 180. Ingsathit A, Thakkinstian A, Chaiprasert A, et al. Prevalence and risk factors of chronic kidney disease in the Thai  
18 adult population: Thai SEEK study. *Nephrology Dialysis Transplantation* 2010;25(5):1567-75.
- 19 181. Singh AK, Farag YM, Mittal BV, et al. Epidemiology and risk factors of chronic kidney disease in India - results  
20 from the SEEK (Screening and Early Evaluation of Kidney Disease) study. *BMC nephrology* 2013;14:114.  
21 doi: 10.1186/1471-2369-14-114 [published Online First: 2013/05/30]
- 22 182. Imai E, Horio M, Watanabe T, et al. Prevalence of chronic kidney disease in the Japanese general population.  
23 *Clinical and experimental nephrology* 2009;13(6):621-30. doi: 10.1007/s10157-009-0199-x [published Online  
24 First: 2009/06/11]
- 25 183. Hwang SJ, Tsai JC, Chen HC. Epidemiology, impact and preventive care of chronic kidney disease in Taiwan.  
26 *Nephrology (Carlton, Vic)* 2010;15 Suppl 2:3-9. doi: 10.1111/j.1440-1797.2010.01304.x [published Online  
27 First: 2010/07/09]
- 28 184. Lin B, Shao L, Luo Q, et al. Prevalence of chronic kidney disease and its association with metabolic diseases: a  
29 cross-sectional survey in Zhejiang province, Eastern China. *BMC nephrology* 2014;15:36. doi: 10.1186/1471-  
30 2369-15-36 [published Online First: 2014/02/25]
- 31 185. Tomonaga Y, Risch L, Szucs TD, et al. The Prevalence of Chronic Kidney Disease in a Primary Care Setting: A  
32 Swiss Cross-Sectional Study. *PloS one* 2013;8(7):e67848. doi: 10.1371/journal.pone.0067848
- 33 186. Jha V, Garcia-Garcia G, Iseki K, et al. Chronic kidney disease: global dimension and perspectives. *Lancet*  
34 2013;382(9888):260-72. doi: 10.1016/s0140-6736(13)60687-x [published Online First: 2013/06/04]
- 35 187. Barsoum RS. Chronic kidney disease in the developing world. *The New England journal of medicine*  
36 2006;354(10):997-9. doi: 10.1056/NEJMp058318 [published Online First: 2006/03/10]
- 37 188. UNAIDS. HIV and AIDS estimates (2015) 2015 [cited 2015. Available from:  
38 <http://www.unaids.org/en/regionscountries/countries/senegal> accessed July 15, 2015.
- 39 189. UNAIDS. HIV and AIDS estimates (2015): UNAIDS; 2015 [Available from:  
40 <http://www.unaids.org/en/regionscountries/countries/swaziland> accessed August 1, 2015
- 41 190. Matic S, Lazarus JV, Donoghoe MC. HIV/AIDS in Europe: moving from death sentence to chronic disease  
42 management: World Health Organization 2006.
- 43 191. Estrella M, Fine DM, Gallant JE, et al. HIV type 1 RNA level as a clinical indicator of renal pathology in HIV-  
44 infected patients. *Clinical infectious diseases : an official publication of the Infectious Diseases Society of*  
45 *America* 2006;43(3):377-80. doi: 10.1086/505497 [published Online First: 2006/06/29]
- 46 192. Deti EK, Thiebaut R, Bonnet F, et al. Prevalence and factors associated with renal impairment in HIV-infected  
47 patients, ANRS C03 Aquitaine Cohort, France. *HIV Med* 2010;11(5):308-17. doi: 10.1111/j.1468-  
48 1293.2009.00780.x [published Online First: 2009/12/17]
- 49 193. Fernando SK, Finkelstein FO, Moore BA, et al. Prevalence of chronic kidney disease in an urban HIV infected  
50 population. *American Journal of the Medical Sciences* 2008;335(2):89-94. doi:  
51 <http://dx.doi.org/10.1097/MAJ.0b013e31812e6b34>
- 52 194. Cao Y, Gong M, Han Y, et al. Prevalence and risk factors for chronic kidney disease among HIV-infected  
53 antiretroviral therapy-naïve patients in Mainland China: A multicenter cross-sectional study. *Nephrology*  
54 2013;18(4):307-12. doi: 10.1111/nep.12031
- 55 195. Rustarazo SB, Fuente SR, de Miguel SC, et al. Prevalence and spectrum of chronic kidney disease in HIV-positive  
56 patients. *European Journal of Hospital Pharmacy: Science and Practice* 2012;19(2):96-97.
- 57 196. Menezes AM, Torelly J, Jr., Real L, et al. Prevalence and risk factors associated to chronic kidney disease in HIV-  
58 infected patients on HAART and undetectable viral load in Brazil. *PloS one* 2011;6(10):e26042. doi:  
59 10.1371/journal.pone.0026042 [published Online First: 2011/10/25]
- 60 197. Sicotte M, Langlois ÉV, Aho J, et al. Association between nutritional status and the immune response in HIV+  
patients under HAART: protocol for a systematic review. *Systematic reviews* 2014;3(1):9.
198. Taylor BS, Sobieszczyk ME, McCutchan FE, et al. The challenge of HIV-1 subtype diversity. *The New England*  
*journal of medicine* 2008;358(15):1590-602. doi: 10.1056/NEJMra0706737 [published Online First:

- 1  
2  
3 2008/04/12]
- 4 199. Wools-Kaloustian KK, Gupta SK. Will there be an epidemic of HIV-related chronic kidney disease in sub-Saharan  
5 Africa? Too soon to tell. *Kidney international* 2008;74(7):845-7. doi: 10.1038/ki.2008.326 [published Online  
6 First: 2008/09/17]
- 7 200. Pokroy-Shapira E, Gelernter I, Molad Y. Evolution of chronic kidney disease in patients with systemic lupus  
8 erythematosus over a long-period follow-up: a single-center inception cohort study. *Clinical rheumatology*  
9 2014;33(5):649-57.
- 10 201. Mak A, Mok CC, Chu WP, et al. Renal damage in systemic lupus erythematosus: a comparative analysis of  
11 different age groups. *Lupus* 2007;16(1):28-34. [published Online First: 2007/02/08]
- 12 202. Rabbani MA, Tahir MH, Siddiqui BK, et al. Renal involvement in systemic lupus erythematosus in Pakistan.  
13 *JPMA The Journal of the Pakistan Medical Association* 2005;55(8):328-32. [published Online First:  
14 2005/09/17]
- 15 203. Chiu H-Y, Huang H-L, Li C-H, et al. Increased risk of chronic kidney disease in rheumatoid arthritis associated  
16 with cardiovascular complications—A National Population-Based Cohort Study. *PloS one*  
17 2015;10(9):e0136508.
- 18 204. Barsoum RS. End-stage renal disease in North Africa. *Kidney international Supplement* 2003(83):S111-4. doi:  
19 10.1046/j.1523-1755.63.s83.23.x [published Online First: 2003/07/17]
- 20 205. Naicker S. End-stage renal disease in Sub-Saharan Africa. *Kidney inter, Suppl* 2013;3(2):161-63. doi:  
21 10.1038/kisup.2013.4
- 22 206. Naicker S. Challenges for nephrology practice in Sub-Saharan Africa. *Nephrology, dialysis, transplantation :*  
23 *official publication of the European Dialysis and Transplant Association - European Renal Association*  
24 2010;25(3):649-50. doi: 10.1093/ndt/gfp727
- 25 207. Noubiap JJ, Naidoo J, Kengne AP. Diabetic nephropathy in Africa: A systematic review. *World journal of diabetes*  
26 2015;6(5):759-73. doi: 10.4239/wjd.v6.i5.759 [published Online First: 2015/06/13]
- 27 208. Brook MO, Bottomley MJ, Mevada C, et al. Repeat testing is essential when estimating chronic kidney disease  
28 prevalence and associated cardiovascular risk. *QJM : monthly journal of the Association of Physicians*  
29 2012;105(3):247-55. doi: 10.1093/qjmed/hcr171 [published Online First: 2011/10/04]
- 30  
31  
32  
33  
34  
35  
36  
37  
38  
39  
40  
41  
42  
43  
44  
45  
46  
47  
48  
49  
50  
51  
52  
53  
54  
55  
56  
57  
58  
59  
60

1  
2  
3  
4  
5  
6  
7  
8  
9  
10  
11  
12  
13  
14  
15  
16  
17  
18  
19  
20  
21  
22  
23  
24  
25  
26  
27  
28  
29  
30  
31  
32  
33  
34  
35  
36  
37  
38  
39  
40  
41  
42  
43  
44  
45  
46  
47  
48  
49  
50  
51  
52  
53  
54  
55  
56  
57  
58  
59  
60



Fig 1

Fig1

254x190mm (300 x 300 DPI)

ew only

1  
2  
3  
4  
5  
6  
7  
8  
9  
10  
11  
12  
13  
14  
15  
16  
17  
18  
19  
20  
21  
22  
23  
24  
25  
26  
27  
28  
29  
30  
31  
32  
33  
34  
35  
36  
37  
38  
39  
40  
41  
42  
43  
44  
45  
46  
47  
48  
49  
50  
51  
52  
53  
54  
55  
56  
57  
58  
59  
60



**Fig 2**

Fig2

254x190mm (300 x 300 DPI)

ew only

1  
2  
3  
4  
5  
6  
7  
8  
9  
10  
11  
12  
13  
14  
15  
16  
17  
18  
19  
20  
21  
22  
23  
24  
25  
26  
27  
28  
29  
30  
31  
32  
33  
34  
35  
36  
37  
38  
39  
40  
41  
42  
43  
44  
45  
46  
47  
48  
49  
50  
51  
52  
53  
54  
55  
56  
57  
58  
59  
60



**Fig 3**

Fig 3

254x190mm (300 x 300 DPI)

ew only

**S1 Table.** Search strategy adopted in PubMed and Ovid MEDLINE

1. exp Renal Dialysis/
2. (hemodialysis or haemodialysis).tw.
3. (hemofiltration or haemofiltration).tw.
4. (hemodiafiltration or haemodiafiltration).tw.
5. dialysis.tw.
6. (CAPD or CCPD or APD).tw.
7. Renal Insufficiency/
8. Kidney Failure/
9. exp Renal Insufficiency, Chronic/
10. Kidney Diseases/
11. Uremia/
12. (end-stage renal or end-stage kidney or endstage renal or endstage kidney).tw.
13. (ESRF or ESKF or ESRD or ESKD).tw.
14. (chronic kidney or chronic renal).tw.
15. (CKF or CKD or CRF or CRD).tw.
16. (predialysis or pre-dialysis).tw.
17. ur?emi\$.tw.
18. 1 or 2 or 3 or 4 or 5 or 6 or 7 or 8 or 9 or 10 or 11 or 12 or 13 or 14 or 15 or 16 or 17
19. afric\$.ti,ab,kw,tw,mp.
20. 18 and 19



S2 Table: Studies among CKD patients

| Study ID                  | Year<br>Country<br>Region   | N   | Population Characteristic                                                                                                 | biopsy | causes of CKD                                                                                                                                                   |
|---------------------------|-----------------------------|-----|---------------------------------------------------------------------------------------------------------------------------|--------|-----------------------------------------------------------------------------------------------------------------------------------------------------------------|
| El Khayat S <sup>31</sup> | 2013, Morocco,<br>North     | 134 | Age( years): 54.4±18.1<br>Male gender: 58.65%                                                                             | no     | DN: 44.02%<br>H.scl: 11.2%<br>Tub.int: 9.7%<br>SLE: 5%<br>Ch.GN: 3.7%<br>Undetermined: 26.11%                                                                   |
| Seck S <sup>32</sup>      | 2013, Senegal,<br>West      | 60  | Age (years): 70.5±54.6<br>Male gender: 52%<br>Hypertension: 20%<br>SBP (mmHg): 167 ± 78<br>DBP (mmHg): 95 ± 55<br>DM: 18% | no     | H.scl: 30%<br>DN: 25%                                                                                                                                           |
| Seck S <sup>33</sup>      | 2008, Senegal,<br>West      | 118 | Age (years): 39.28±16.4<br>Male gender: 56%<br>SBP (mmHg): 160±15<br>DBP (mmHg): 90±15                                    | yes    | Ch.GN: 35%<br>Vascular nephropathy: 20.2%<br>Tub.int: 12%<br>DN: 10.5%<br>PKD: 4.2%<br>Autoimmune: 4.2%<br>Neoplasm: 1.6%<br>H.scl: 0.8%<br>Undetermined: 11.5% |
| Bourquia A <sup>34</sup>  | 2002, Morocco,<br>North     | 420 | Age (years): 46±3<br>Male gender: 52%                                                                                     | no     | PKD: 6.5%                                                                                                                                                       |
| Ouattara B <sup>35</sup>  | 2011, Ivory Coast,<br>West  | 301 | Age (years): 44±10<br>Male gender: 56%<br>Hypertension: 33.5%<br>DM: 12.3%                                                | no     | Nephroangiosclerosis:25.2%<br>HIV nephropathy:17%<br>Interstitial nephritis: 10.3%<br>DN: 9.6%<br>Ch.GN: 6.6%<br>PKD:2.3%<br>Undetermined: 29.2%                |
| Lengani A <sup>36</sup>   | 1997, Burkina<br>Faso, West | 174 | Age (years): 36±15<br>Male gender: 63%<br>Hypertension: 64.9%                                                             | no     | Ch.GN: 42.5%<br>Vascular nephropathy: 23.6%<br>Tub.int: 16.1%<br>PKD: 1%<br>Undetermined: 16.8%                                                                 |
| Afifi A <sup>37</sup>     | 2005, Egypt, North          | 220 | Not known                                                                                                                 | no     | DN: 28.2%<br>H.scl: 25.5%<br>Obstructive uropathy: 13.5%<br>Cystitis: 6.8%<br>Simple cyst: 4.5%<br>Undetermined: 29.5%                                          |
| Diouf B <sup>38</sup>     | 2000, Senegal,<br>West      | 261 | Age (years): 44(range:15-88)<br>Male gender: 46%                                                                          | no     | Nephroangiosclerosis: 25%<br>DN: 20.5%<br>Ch.GN: 15%<br>Undetermined : 34%                                                                                      |
| Niang A <sup>39</sup>     | 2008, Senegal,<br>West      | 258 | Age (years): 28 (range:15-79)<br>Male gender: 75%<br>Hypertension: 12.2%                                                  | yes    | FSGS: 52%<br>MGN: 12%<br>Minimal change diseases: 7.7%                                                                                                          |
| Sabi K <sup>40</sup>      | 2011, Togo, West            | 398 | Age (years): mean: 42.6                                                                                                   | not    | Ch.GN: 40.2%                                                                                                                                                    |

|                            |                     |      |                                                                                                                                  |       |                                                                                                                                                                                                                                                       |
|----------------------------|---------------------|------|----------------------------------------------------------------------------------------------------------------------------------|-------|-------------------------------------------------------------------------------------------------------------------------------------------------------------------------------------------------------------------------------------------------------|
|                            |                     |      | Male gender: 57%                                                                                                                 | known | Tub.int: 20.9%<br>Nephroangiosclerosis: 17.6%                                                                                                                                                                                                         |
| Ulasi I <sup>41</sup>      | 2010, Nigeria, West | 1538 | Age (years): 42.55±15.43<br>Male gender: 65%<br>Hypertension: 17.2%<br>DM: 11.8%                                                 | yes   | H.scl: 17.2%<br>Ch.GN:14.6%<br>DN:11.8%<br>Undetermined:51.6%<br>Others: 4.6%                                                                                                                                                                         |
| AbdErrahim E <sup>42</sup> | 2001, Tunis, North  | 1471 | Age (years): 38.3±14.6<br>Male gender: 69%                                                                                       | no    | DN: 20.3%                                                                                                                                                                                                                                             |
| Abdou N <sup>43</sup>      | 2003, Senegal, West | 115  | Age (years): 28 (IQR:5-60)<br>Male gender: 56%                                                                                   | yes   | FSGS: 46.9%<br>MGN:8.7%<br>Minimal change disease:6.1%<br>Endocapillary GN: 2.6%<br>Mesangioproliferative: 1.7%<br>Extracapillary GN:1.7%<br>IgA nephropathy:1.7%<br>SLE: 13%<br>H.scl: 2%<br>Undetermined: 7%<br>Others:11%                          |
| Afifi A <sup>44</sup>      | 2004, Egypt, North  | 3172 | Age (years): 56.5±29.2                                                                                                           | yes   | DN: 14.5%                                                                                                                                                                                                                                             |
| Afifi A <sup>45</sup>      | 1999, Egypt, North  | 4905 | Age (years): 45.6±14.2<br>Male gender: 62.4%                                                                                     | yes   | H.scl: 28%<br>Ch.GN: 16.2%<br>Obstructive uropathy: 15%<br>DN: 8.9%<br>PKD: 3%<br>Undetermined: 16.2%                                                                                                                                                 |
| Agaba E <sup>46</sup>      | 2009, Nigeria, West | 130  | Age (years): 41±16<br>Male gender: 68%                                                                                           | no    | Ch.GN: 39%<br>H.scl: 34.6%<br>DN: 11.8%<br>PKD: 6.9%<br>Undetermined: 7.7%                                                                                                                                                                            |
| Alashek W <sup>47</sup>    | 2012, Libya, North  | 2417 | Age (years): 49 (range: 36-61)<br>Male gender: 58%                                                                               | no    | DN: 26.5%<br>Ch.GN: 21.2%<br>H.scl: 14.6%<br>Congenital and hereditary: 12.3%<br>PKD: 6.3%<br>Obstructive uropathy: 5%<br>Chronic pyelonephritis: 2%<br>Interstitial nephritis: 1.2%<br>Autoimmune disease: 0.7%<br>Other: 2.9%<br>undetermined: 7.3% |
| Alasia D <sup>48</sup>     | 2012, Nigeria, West | 320  | Age (years): 46.2±17.6<br>Male gender: 63%<br>SBP (mmHg): 171.2±31.9<br>DBP(mmHg): 102.5±27.4                                    | yes   | Ch.GN: 45.7%<br>H.scl: 29.8%<br>DN: 17.5%<br>PKD: 3%<br>Obstructive uropathy: 2%<br>Undetermined: 2%                                                                                                                                                  |
| Alebiosu C <sup>49</sup>   | 2006, Nigeria, West | 153  | Age (years): 39.6±14.8<br>Male gender: 59%<br>Hypertension: 38.5%<br>SBP (mmHg): 167.3±15.5<br>DBP (mmHg): 106±28.9<br>DM: 13.1% | no    | Ch.GN: 41.2%<br>H.scl: 26.1%<br>DN: 13.1%                                                                                                                                                                                                             |

|                            |                           |      |                                                                                                                                                             |     |                                                                                                                                                                                                                                                                                                                                                                                                                          |
|----------------------------|---------------------------|------|-------------------------------------------------------------------------------------------------------------------------------------------------------------|-----|--------------------------------------------------------------------------------------------------------------------------------------------------------------------------------------------------------------------------------------------------------------------------------------------------------------------------------------------------------------------------------------------------------------------------|
| Amira C <sup>50</sup>      | 2012, Nigeria, West       | 201  | Age (years): 47.5±15.7<br>Male gender: 56.2<br>Hypertension: 42.8%<br>DM: 13.4%                                                                             | no  | H.scl: 42.8%<br>Ch.GN: 15.9%<br>Obstructive uropathy: 14.9%<br>DN: 13.4%<br>PKD: 1%<br>SLE: 1%<br>Sickle cell nephropathy: 1%<br>Analgesic nephropathy: 0.5%<br>Undetermined : 9.5%                                                                                                                                                                                                                                      |
| Arogundade F <sup>51</sup> | 2011, Nigeria, West       | 760  | Age(years): 36 (range:15-90)<br>Male gender: 70.3%<br>Hypertension: 72.4%<br>SBP (mmHg): 160 (range:120 – 270)<br>DBP (mmHg): 100 (range:50 – 209 )         | no  | Ch. GN: 43.7%<br>H.scl: 31.1%<br>Obstructive uropathy: 6.7%<br>DN: 3.7%<br>Tub.int: 2.2%<br>PKD: 0.7%<br>Undetermined : 12%                                                                                                                                                                                                                                                                                              |
| Counil É <sup>52</sup>     | 2008, Tunis, North        | 6397 | Age (years): 51.4±18.0<br>Male gender: 56.5%                                                                                                                | no  | DN: 35%<br>H.scl: 25.3%<br>Tub.int: 19.7%<br>Ch.GN: 13%<br>PKD: 2.2%<br>Undetermined: 52.8%                                                                                                                                                                                                                                                                                                                              |
| Chijioke A <sup>53</sup>   | 2012, Nigeria, West       | 116  | Age (years): Male: 50.89±13.43 and Female: 48.22±14.70<br>Male gender: 61.2%<br>SBP(mmHg): 153.41±27.12<br>DBP (mmHg): 93.92±17.19                          | no  | H.scl: 52.58%<br>Ch.GN: 17.2%<br>Tub.int: 17.1%<br>PKD: 4.3%<br>DN: 2.6%<br>Chronic pyelonephritis: 2.6%<br>Obstructive uropathy: 1.7%<br>Undetermined: 1.9%                                                                                                                                                                                                                                                             |
| Madala N <sup>54</sup>     | 2014, South Africa, South | 302  | Age (years): 47.1±17.0<br>Male gender: 45%<br>SBP (mmHg): (male) 144.6 ± 28.3. (female) 141.1 ± 25.5<br>DBP(mmHg): (male) 84.2 ± 18.1. (female) 81.0 ± 19.0 | yes | H.scl: 75.2%<br>DN: 29.8%<br>HIV nephropathy: 28.6%<br>Ch.GN: 7%<br>Tub.int: 6%<br>Undetermined: 6%                                                                                                                                                                                                                                                                                                                      |
| Okpechi I <sup>55</sup>    | 2013, South Africa, South | 111  | Age (years): 66.3 ± 5.7<br>Male gender: 47.7%<br>Hypertension: 71%<br>DM: 19.8%                                                                             | yes | MGN: 14.4%<br>Mesangioproliferative GN: 8.1%<br>Crescentic GN: 7.2%<br>Mesangiocapillary GN: 3.6%<br>Post infectious GN: 2.7%<br>FSGS: 1.8%<br>IgAN nephropathy: 0.9%<br>DN: 12.6%<br>Ch.GN: 5.4%<br>SLE: 4.5%<br>H.scl: 3.6%<br>Amyloidosis: 2.7%<br>Myeloma: 2.7%<br>Crescentic GN: 1.8%<br>HIV nephropathy: 0.9%<br>Thrombocytopenic purpura: 0.9%<br>Hemolytic uremic: 0.9%<br>Tub.int: 17.2%<br>Miscellaneous: 8.1% |

|                             |                           |      |                                                                                                                                                                         |     |                                                                                                                                                                                                                                                                                                                                                  |
|-----------------------------|---------------------------|------|-------------------------------------------------------------------------------------------------------------------------------------------------------------------------|-----|--------------------------------------------------------------------------------------------------------------------------------------------------------------------------------------------------------------------------------------------------------------------------------------------------------------------------------------------------|
| Laleye A <sup>56</sup>      | 2012, Benin, West         | 3783 | Age (years): 47.2 (range:29 - 70 )<br>Male gender: 24%<br>Hypertension: 59%                                                                                             | no  | PKD: 1.8%                                                                                                                                                                                                                                                                                                                                        |
| Okunola Y <sup>57</sup>     | 2013, Nigeria, West       | 300  | Age (years): 49 ±16.25<br>Male gender: 68%                                                                                                                              | no  | H.Scl: 38.8%<br>Ch.GN: 28.8%<br>DN:22.5%<br>PKD:2.7%<br>SLE: 1.1%<br>Undetermined: 6.1%                                                                                                                                                                                                                                                          |
| Bello B <sup>58</sup>       | 2013, Nigeria, West       | 120  | Age (years): 47 + 14<br>Male gender: 60%<br>SBP(mmHg): 162 ± 32<br>DBP(mmHg): 94.9 ± 19.6                                                                               | yes | H.scl: 45%<br>Ch.GN: 15.8%<br>DN: 12.5%<br>Obstructive uropathy : 12.5%<br>PKD: 3.3%<br>Ch. Pyelonephritis: 2.5%<br>SLE: 1.7%<br>Analgesic nephropathy: 1.7%<br>Sickle cell nephropathy: 1.7%<br>Toxic nephropathy: 0.8%<br>Undetermined: 2.5%                                                                                                   |
| El-Minshawy O <sup>59</sup> | 2011, Egypt, North        | 800  | Age(years): 46 ± 13<br>Male gender: 65%                                                                                                                                 | no  | H.scl: 20%<br>Obstructive uropathy: 15%<br>Ch.GN: 11%<br>SLE: 9%<br>DN: 8%<br>Analgesic nephropathy: 5%<br>Chronic pyelonephritis: 5%<br>Undetermined: 27%                                                                                                                                                                                       |
| Okpechi I <sup>60</sup>     | 2010, South Africa, South | 294  | Age (years): 33.9 ± 12.0<br>Male gender: 45.2%<br>Hypertension:39.8%                                                                                                    | yes | Crescentic GN: 5%<br>Ch GN: 15.7%<br>FSGS: 15.7%<br>IgA nephropathy: 1.7%<br>Minimal change disease: 6.6%<br>Mesangiocapillary GN: 19%<br>MGN: 14.9%<br>Mesangial proliferative GN: 12.4%<br>Postinfectious GN : 9%<br>HIV nephropathy: 42.8%<br>SLE: 13.3%<br>DN: 9.2%<br>MGN: 6.9%<br>Ch.GN: 5.85%<br>Mesnagiocapillary: 4.6%<br>Others: 17.4% |
| Madala N <sup>61</sup>      | 2012, South Africa, South | 148  | Age(years): 41.4 ± 13.1<br>Male gender: 37.2%<br>SBP (mmHg): African (133.6 ± 20.2). Indian (130.1 ± 20.6)<br>DBP (mmHg): African:(133.6 ± 20.2). Indian (130.1 ± 20.6) | no  | Ch.GN: 39.2%<br>H.scl: 34.4%<br>DN: 7.4%<br>PKD:6.8%<br>Undetermined: 3.4%                                                                                                                                                                                                                                                                       |
| El Farouki M <sup>62</sup>  | 2013, Morocco, North      | 207  | Age (years): 52.43 ± 15.48<br>Male gender: 64.3%<br>Hypertension: 73.9%<br>DM:41.5%                                                                                     | no  | DN: 41.5%<br>Ch.GN: 16%<br>Tub.int: 14%<br>H.scl: 12%                                                                                                                                                                                                                                                                                            |

|                          |                           |      |                                                                                       |     |                                                                                                                                                                                                                                                                                                                                                 |
|--------------------------|---------------------------|------|---------------------------------------------------------------------------------------|-----|-------------------------------------------------------------------------------------------------------------------------------------------------------------------------------------------------------------------------------------------------------------------------------------------------------------------------------------------------|
|                          |                           |      |                                                                                       |     | PKD: 1%<br>Undetermined: 15.5%                                                                                                                                                                                                                                                                                                                  |
| Okpechi I <sup>63</sup>  | 2011, South Africa, South | 1284 | Age (years): 36.8 ±14.0<br>Male gender: 45.2%                                         | yes | Mesangiocapillary: 20.4%<br>Mesangioproliferative: 19.2%<br>MGN: 18.5%<br>Crescentic GN: 11.4%<br>FSGS: 10.5%<br>Post infectious: 8.2%<br>Minimal change: 6%<br>IgA nephropathy: 5.8%<br>SLE: 19%<br>Infection related: 15%<br>Vascular causes: 9%<br>Hereditary: 6%<br>Undetermined: 3.5%                                                      |
| Niang A <sup>64</sup>    | 2014, Senegal, West       | 62   | Age (years): 47 ± 13<br>Male gender: 55%                                              | no  | Nephrosclerosis: 40.3%<br>Ch.GN: 21%<br>DN: 19.4%<br>PKD: 3.2%<br>Tub.int: 1.6%<br>Undetermined: 14.5%                                                                                                                                                                                                                                          |
| Buargub M <sup>65</sup>  | 2008, Libya, North        | 124  | Age (years): 47.4±15<br>Male gender: 62%                                              | no  | DN: 27.4%<br>H.scl: 10.5%<br>Ch.GN: 8%<br>Nephrolithiasis: 7.3%<br>Amyloidosis: 6.8%<br>Chronic interstitial nephritis: 6.4%<br>PKD: 4%<br>Ischemic : 3.2%<br>SLE: 0.8%<br>Familial: 0.8%<br>Undetermined: 30.6%                                                                                                                                |
| Chijioke A <sup>66</sup> | 2010, Nigeria, West       | 436  | Age (years): 47.4 ± 16.2<br>Male gender: 57%                                          | no  | PKD: 15.4%                                                                                                                                                                                                                                                                                                                                      |
| Elsharif M <sup>67</sup> | 2011, Sudan, East         | 224  | Age (years): 45.78± 17.16<br>Male gender: 67.8%                                       | yes | H.sclerosis: 14.29%<br>Obstructive uropathy: 11.61%<br>Ch.GN: 9.8%<br>DN: 8.04%<br>Anaglesic nephropathy: 1.34%<br>Renovascular: 0.45%<br>PKD: 0.9%<br>Undetermined: 53.57%                                                                                                                                                                     |
| Elkhatib M <sup>68</sup> | 2012, Egypt, North        | 437  | Age (years): 89% <50 years.<br>8.5% 50–60 years and 3% > 50 years<br>Male gender: 52% | yes | SLE: 24.7%<br>MGN: 10.9%<br>FSGS: 6.8%<br>Mesangiocapillary GN: 6.7%<br>Acute interstitial nephritis: 6.25%<br>Membranous nephropathy: 5.4%<br>Crescentic GN: 5.4%<br>Chronic interstitial nephritis: 4.5%<br>Minimal change disease: 3.8%<br>focal proliferative GN: 3.6%<br>Amyloidosis: 2.7%<br>Nephrosclerosis: 1.13%<br>Undetermined: 3.6% |

|                             |                        |     |                                                                                  |     |                                                                                                                                                                                                      |
|-----------------------------|------------------------|-----|----------------------------------------------------------------------------------|-----|------------------------------------------------------------------------------------------------------------------------------------------------------------------------------------------------------|
| Ibrahim S <sup>69</sup>     | 2012, Egypt, North     | 924 | Age (years): 26.5 ± 14.6 years<br>Male gender: 47%                               | yes | FSGS: 28.57%<br>mesangioproliferative GN: 20.02%<br>MGN : 14%<br>Minimal change disease: 8.55%<br>Amyloidosis: 5.52%<br>Diffuse proliferative GN: 5.20%<br>Focal proliferative GN: 3.68%<br>DN:0.22% |
| Ayach G <sup>70</sup>       | 2011, Morocco, North   | 386 | Age (years): 19 (IQR:12-25)<br>Male gender: 61%                                  | yes | MGN :79.20%<br>FSGS: 9.10%<br>Extramembranous glomerulonephritis:9.10%<br>Renal amyloidosis: 2.6%.                                                                                                   |
| Ramilitiana B <sup>71</sup> | 2016, Madagascar, East | 239 | Age (years): 45.5( range: 16-82)<br>Male gender: 40%<br>Diabetes mellitus: 12.6% | No  | Ch.GN: 40.1%<br>H.Scl: 35.6%<br>DN:12.6%<br>Tub.int: 10.46%                                                                                                                                          |
| Zajjari Y <sup>72</sup>     | 2012, Morocco, North   | 16  | Age (years): 60 (47-79)<br>Male gender: 81.3%<br>Hypertension: 56.3%             | Yes | DN: 25%                                                                                                                                                                                              |

Tub. Int: tubulo-interstitial, DN: diabetic nephropathy, H. Scl: hypertensive sclerosis, Ch. GN: chronic glomerulonephritis, PKD: polycystic kidney disease, DM: diabetes mellitus, SLE: sytemic lupus erthmatosus , FSGS: focal segemental glomerulosclerosis, MGN: membronus gloemrulonephritis



# PRISMA 2009 Checklist

| Section/topic                      | #  | Checklist item                                                                                                                                                                                                                                                                                              | Reported on page #       |
|------------------------------------|----|-------------------------------------------------------------------------------------------------------------------------------------------------------------------------------------------------------------------------------------------------------------------------------------------------------------|--------------------------|
| <b>TITLE</b>                       |    |                                                                                                                                                                                                                                                                                                             |                          |
| Title                              | 1  | Identify the report as a systematic review, meta-analysis, or both.                                                                                                                                                                                                                                         | 1                        |
| <b>ABSTRACT</b>                    |    |                                                                                                                                                                                                                                                                                                             |                          |
| Structured summary                 | 2  | Provide a structured summary including, as applicable: background; objectives; data sources; study eligibility criteria, participants, and interventions; study appraisal and synthesis methods; results; limitations; conclusions and implications of key findings; systematic review registration number. | 2                        |
| <b>INTRODUCTION</b>                |    |                                                                                                                                                                                                                                                                                                             |                          |
| Rationale                          | 3  | Describe the rationale for the review in the context of what is already known.                                                                                                                                                                                                                              | 3,4                      |
| Objectives                         | 4  | Provide an explicit statement of questions being addressed with reference to participants, interventions, comparisons, outcomes, and study design (PICOS).                                                                                                                                                  | 4                        |
| <b>METHODS</b>                     |    |                                                                                                                                                                                                                                                                                                             |                          |
| Protocol and registration          | 5  | Indicate if a review protocol exists, if and where it can be accessed (e.g., Web address), and, if available, provide registration information including registration number.                                                                                                                               | N/A                      |
| Eligibility criteria               | 6  | Specify study characteristics (e.g., PICOS, length of follow-up) and report characteristics (e.g., years considered, language, publication status) used as criteria for eligibility, giving rationale.                                                                                                      | 4,5                      |
| Information sources                | 7  | Describe all information sources (e.g., databases with dates of coverage, contact with study authors to identify additional studies) in the search and date last searched.                                                                                                                                  | 4,5                      |
| Search                             | 8  | Present full electronic search strategy for at least one database, including any limits used, such that it could be repeated.                                                                                                                                                                               | 4, supplementary table 1 |
| Study selection                    | 9  | State the process for selecting studies (i.e., screening, eligibility, included in systematic review, and, if applicable, included in the meta-analysis).                                                                                                                                                   | 4,5                      |
| Data collection process            | 10 | Describe method of data extraction from reports (e.g., piloted forms, independently, in duplicate) and any processes for obtaining and confirming data from investigators.                                                                                                                                  | 4,5                      |
| Data items                         | 11 | List and define all variables for which data were sought (e.g., PICOS, funding sources) and any assumptions and simplifications made.                                                                                                                                                                       | 4,5                      |
| Risk of bias in individual studies | 12 | Describe methods used for assessing risk of bias of individual studies (including specification of whether this was done at the study or outcome level), and how this information is to be used in any data synthesis.                                                                                      | 5,6                      |
| Summary measures                   | 13 | State the principal summary measures (e.g., risk ratio, difference in means).                                                                                                                                                                                                                               | 6                        |



# PRISMA 2009 Checklist

|                      |    |                                                                                                                                                           |   |
|----------------------|----|-----------------------------------------------------------------------------------------------------------------------------------------------------------|---|
| Synthesis of results | 14 | Describe the methods of handling data and combining results of studies, if done, including measures of consistency (e.g., $I^2$ ) for each meta-analysis. | 6 |
|----------------------|----|-----------------------------------------------------------------------------------------------------------------------------------------------------------|---|

Page 1 of 2

| Section/topic                 | #  | Checklist item                                                                                                                                                                                                                                                                                             | Reported on page #                          |
|-------------------------------|----|------------------------------------------------------------------------------------------------------------------------------------------------------------------------------------------------------------------------------------------------------------------------------------------------------------|---------------------------------------------|
| Risk of bias across studies   | 15 | Specify any assessment of risk of bias that may affect the cumulative evidence (e.g., publication bias, selective reporting within studies).                                                                                                                                                               | 6                                           |
| Additional analyses           | 16 | Describe methods of additional analyses (e.g., sensitivity or subgroup analyses, meta-regression), if done, indicating which were pre-specified.                                                                                                                                                           | 6                                           |
| <b>RESULTS</b>                |    |                                                                                                                                                                                                                                                                                                            |                                             |
| Study selection               | 17 | Give numbers of studies screened, assessed for eligibility, and included in the review, with reasons for exclusions at each stage, ideally with a flow diagram.                                                                                                                                            | 6,7,17, Fig.1                               |
| Study characteristics         | 18 | For each study, present characteristics for which data were extracted (e.g., study size, PICOS, follow-up period) and provide the citations.                                                                                                                                                               | Tables( 2-4, supplementary table 2) P:19-51 |
| Risk of bias within studies   | 19 | Present data on risk of bias of each study and, if available, any outcome level assessment (see item 12).                                                                                                                                                                                                  | Tables( 2-4, supplementary table 2) P:19-51 |
| Results of individual studies | 20 | For all outcomes considered (benefits or harms), present, for each study: (a) simple summary data for each intervention group (b) effect estimates and confidence intervals, ideally with a forest plot.                                                                                                   | 6-11, 18-51                                 |
| Synthesis of results          | 21 | Present results of each meta-analysis done, including confidence intervals and measures of consistency.                                                                                                                                                                                                    | N/A                                         |
| Risk of bias across studies   | 22 | Present results of any assessment of risk of bias across studies (see Item 15).                                                                                                                                                                                                                            | Tables 2,3 and 4, P: 19-51                  |
| Additional analysis           | 23 | Give results of additional analyses, if done (e.g., sensitivity or subgroup analyses, meta-regression [see Item 16]).                                                                                                                                                                                      | N/A                                         |
| <b>DISCUSSION</b>             |    |                                                                                                                                                                                                                                                                                                            |                                             |
| Summary of evidence           | 24 | Summarize the main findings including the strength of evidence for each main outcome; consider their relevance to key groups (e.g., healthcare providers, users, and policy makers).                                                                                                                       | 11                                          |
| Limitations                   | 25 | Discuss limitations at study and outcome level (e.g., risk of bias), and at review-level (e.g., incomplete retrieval of identified research, reporting bias).<br>For peer review only, <a href="http://bmjopen.bmj.com/site/about/guidelines.xhtml">http://bmjopen.bmj.com/site/about/guidelines.xhtml</a> | 12,14, 15                                   |





# PRISMA 2009 Checklist

1  
2  
3  
4  
5  
6  
7  
8  
9  
10  
11  
12  
13  
14  
15  
16  
17  
18  
19  
20  
21  
22  
23  
24  
25  
26  
27  
28  
29  
30  
31  
32  
33  
34  
35  
36  
37  
38  
39  
40  
41  
42  
43  
44  
45  
46  
47  
48  
49

|                |    |                                                                                                                                            |    |
|----------------|----|--------------------------------------------------------------------------------------------------------------------------------------------|----|
| Conclusions    | 26 | Provide a general interpretation of the results in the context of other evidence, and implications for future research.                    | 16 |
| <b>FUNDING</b> |    |                                                                                                                                            |    |
| Funding        | 27 | Describe sources of funding for the systematic review and other support (e.g., supply of data); role of funders for the systematic review. | 54 |

From: Moher D, Liberati A, Tetzlaff J, Altman DG, The PRISMA Group (2009). Preferred Reporting Items for Systematic Reviews and Meta-Analyses: The PRISMA Statement. PLoS Med 6(7): e1000097. doi:10.1371/journal.pmed1000097

For more information, visit: [www.prisma-statement.org](http://www.prisma-statement.org).

Page 2 of 2

# BMJ Open

## Prevalence and burden of chronic kidney disease among the general population and high risk groups in Africa: a systematic review"

|                                 |                                                                                                                                                                                                                                                                                                                                                                                                                                                                                                                                                                                                              |
|---------------------------------|--------------------------------------------------------------------------------------------------------------------------------------------------------------------------------------------------------------------------------------------------------------------------------------------------------------------------------------------------------------------------------------------------------------------------------------------------------------------------------------------------------------------------------------------------------------------------------------------------------------|
| Journal:                        | <i>BMJ Open</i>                                                                                                                                                                                                                                                                                                                                                                                                                                                                                                                                                                                              |
| Manuscript ID                   | bmjopen-2016-015069.R4                                                                                                                                                                                                                                                                                                                                                                                                                                                                                                                                                                                       |
| Article Type:                   | Research                                                                                                                                                                                                                                                                                                                                                                                                                                                                                                                                                                                                     |
| Date Submitted by the Author:   | 25-Aug-2017                                                                                                                                                                                                                                                                                                                                                                                                                                                                                                                                                                                                  |
| Complete List of Authors:       | Abd ElHafeez, Samar; Alexandria University High Institute of Public Health, Epidemiology<br>Bolignano, Davide; CNR-IFC, Clinical Epidemiology of Renal Diseases and Hypertension, Reggio Cal Unit<br>D'Arrigo, Graziella; CNR-IFC, Clinical Epidemiology of Renal Diseases and Hypertension, Reggio Cal Unit<br>Dounousi, Evangelia; University of Ioannina School of Medicine, Nephrology<br>Tripepi, Giovanni; CNR-IFC, Clinical Epidemiology of Renal Diseases and Hypertension, Reggio Cal Unit<br>Zoccali, Carmine; CNR-IFC, Clinical Epidemiology of Renal Diseases and Hypertension, Reggio Cal Unit; |
| <b>Primary Subject Heading</b>: | Epidemiology                                                                                                                                                                                                                                                                                                                                                                                                                                                                                                                                                                                                 |
| Secondary Subject Heading:      | Renal medicine, Research methods                                                                                                                                                                                                                                                                                                                                                                                                                                                                                                                                                                             |
| Keywords:                       | CKD, Africa, Systematic review                                                                                                                                                                                                                                                                                                                                                                                                                                                                                                                                                                               |
|                                 |                                                                                                                                                                                                                                                                                                                                                                                                                                                                                                                                                                                                              |

SCHOLARONE™  
Manuscripts

1  
2  
3 1 **TITLE PAGE**  
4 2

5 3 **Prevalence and burden of chronic kidney disease among the general population and high risk**  
6 **groups in Africa: a systematic review"**  
7 4

8 5 *Samar Abd ElHafeez<sup>1</sup> Dr.PH, Davide Bolignano<sup>2</sup> MD; Graziella D'Arrigo<sup>2</sup>, Ph.D; Evangelia Dounousi<sup>3</sup>,Ph.D;*  
9 6 *Giovanni Tripepi<sup>2</sup>, Ph.D; Carmine Zoccali<sup>2</sup>, FASN, FNKF, FERA*  
10 7

11 8 <sup>1</sup>*High Institute of Public Health - Alexandria University, Epidemiology, Alexandria, EGYPT*

12 9 <sup>2</sup>*CNR/IFC, Clin. Epid. and Physiopath. of Renal Dis. and Hypert., Reggio Calabria, ITALY*

13 10 <sup>3</sup>*Department of Nephrology, School of Health Sciences - University of Ioannina, Ioannina, GREECE*  
14 11

15 12 Correspondence:

16 13 Prof. Carmine Zoccali

17 14 CNR Clinical Epidemiology and Physiopathology of Renal Diseases and Hypertension of Reggio  
18 15 Calabria, c/o Nefrologia e CNR Ospedali Riuniti 89124 Reggio Cal, ITALY

19 16 Email: carmine.zoccali@tin.it

20 17 FAX 0039.0965.26879  
21 18

22 19 **Word count:**

23 20 **Abstract: 300**

24 21 **Body of the manuscript: 5631**

25 22 **Keywords:** CKD, Africa, systematic review  
26 23  
27 24  
28 25  
29 26  
30 27  
31 28  
32 29  
33 30  
34 31  
35 32  
36 33  
37 34  
38 35  
39 36  
40 37  
41 38  
42 39  
43 40  
44 41  
45 42  
46 43  
47 44  
48 45  
49 46  
50  
51  
52  
53  
54  
55  
56  
57  
58  
59  
60

## ABSTRACT

**Objectives:** While increasing attention is paid to the rising prevalence of chronic diseases in Africa, there is little focus on chronic kidney disease (CKD). This systematic review assesses CKD burden among the general population and high-risk groups on the entire African continent

**Design, setting, and participants:** We searched MEDLINE and PUBMED databases for articles published between January 1<sup>st</sup>, 1995 and April 7<sup>th</sup>, 2017 by sensitive search strategies focusing on CKD surveys at the community level and high risk groups. In total, 7918 references were evaluated, of which 7766 articles were excluded because they did not meet the inclusion criteria. Thus, 152 studies were included in the final analysis

**Outcome measurement:** The prevalence of CKD in each study group was expressed as a range and pooled prevalence rate of CKD was calculated as a point estimate and 95% CI. No meta-analysis was done. Data were presented for different population.

**Results:** In the community-level studies, based on available medium and high quality studies, The prevalence of CKD ranged from 2% to 41% (pooled prevalence:10.1%; 95% CI: 9.8%-10.5%). The prevalence of CKD in the high risk groups ranged from 1% to 46% (pooled prevalence 5.6%; 95% CI: 5.4-5.8%) in HIV (based on available medium and high quality studies), 11% to 90% (Pooled prevalence: 24.7%; 95%CI: 23.6-25.7%) in diabetes (based on all available studies which are of low quality except four of medium quality) and 13% to 51% (pooled prevalence: 34.5%; 95 % CI: 34.04%-36%) in hypertensive patients (based on all available studies which are of low quality except two of medium quality)

**Conclusion:** In Africa, CKD is a public health problem, mainly attributed to high risk conditions as hypertension and diabetes. The poor data quality restricts the validity of the findings and draws the attention to the importance of designing future robust studies

### Strengths and limitations of the study

- This systematic review assessed the CKD burden among the general population and high-risk groups on the entire African continent based on studies that covered all Africa from January 1<sup>st</sup>, 1995 till April 7<sup>th</sup>, 2017
- The quality of the included articles was assessed based on standard criteria dealing with clinical trials, diagnostic studies, and observational studies. The articles were assessed based on the population sampling and precision, sampling technique, response rate, and exclusion rate.
- No meta -analysis was conducted in this review due to the huge discrepancy in the definition used to identify CKD, the methods of creatinine measurement, urine protein assessment, and in the quality of the reporting.
- The review findings were limited by the low quality of the majority of studies in Africa
- There is paucity of information about CKD prevalence in age and gender groups which affects the accuracy of the pooled prevalence estimated from each group
- The prevalence of CKD reported in this review should be interpreted with caution due to the bias introduced from the heterogeneity between studies, analytical and methodological issues, sample size, and study population selection

## 1 INTRODUCTION

2 Chronic kidney disease (CKD) is an emerging global public health problem<sup>1</sup>. The disease is a  
3 component of a new epidemic of chronic conditions that replaced malnutrition and infection as  
4 leading causes of mortality during the twentieth century<sup>2</sup>. Age-standardized death rates due to CKD  
5 have increased during the last 23 years. CKD has shifted from the 36<sup>th</sup> cause of death in 1990 to the  
6 19<sup>th</sup> cause in 2013<sup>3</sup>. The worldwide increase in CKD and kidney failure—necessitating renal  
7 replacement therapy (RRT) —and the high rate of cardiovascular mortality and morbidity  
8 attributable to CKD are poised to reach epidemic proportions over the next decade. CKD  
9 complications represent a considerable burden on global health care resources and only a small  
10 number of countries have sufficiently robust economies to meet the challenge posed by this disease.  
11 Socioeconomic differences in health exist and individuals of lower socioeconomic status (SES)  
12 have a higher risk for mortality and morbidity compared with those of higher SES<sup>4</sup>. A change in the  
13 global approach to CKD from the treatment of ESRD to intensive primary and secondary  
14 prevention is therefore considered an absolute public health priority<sup>5</sup>.

15 Africa is the second largest continent in the world, with a population of over 1 billion; 961.5  
16 million people live in sub-Saharan Africa and 195 million in Northern Africa<sup>6</sup>. Africa now faces the  
17 dual challenge of infectious illnesses and chronic diseases. Africa's chronic disease burden is  
18 secondary to various factors, including increased life expectancy, changing lifestyle practices,  
19 poverty, urbanization and globalization<sup>7</sup>. The World Health Assembly advocated the Global Action  
20 Plan for the Prevention and Control of non-communicable diseases 2013–2020. One of its targets is  
21 to reduce premature mortality from chronic diseases by 25% in 2025. These actions have the  
22 potential to make a significant impact on the burden of CKD<sup>8</sup>. Unfortunately, CKD problem  
23 remains underestimated on the entire continent due to lack of epidemiological information from  
24 different African countries. There exists only a single systematic review conducted in sub-Saharan  
25 Africa which concluded that CKD is a prevalent and potentially escalating disease across Sub-

1 Saharan Africa, with both communicable and non-communicable risk factors<sup>9</sup>. Strategies aimed at  
2 managing CKD epidemics in Africa critically depend on a reliable assessment of the burden of the  
3 problem and the establishment of affordable early detection programs. Previous studies reported the  
4 prevalence of CKD among the general population or the specific prevalence of this condition in  
5 diseases that are recognized as drivers of renal damage (e.g., diabetes mellitus). These estimates  
6 have varied across studies due to differences in the methods of Glomerular Filtration Rate (GFR)  
7 measurement, background risk (general population vs. high risk groups), or demographic  
8 characteristics (e.g., age, gender)<sup>10</sup>.

9 With this background in mind, this review aimed to increase the systematic information on the  
10 burden of CKD in the general population and high risk groups of the entire African continent and  
11 provide an estimate of the prevalence of CKD in different regions of Africa.

## 12 **MATERIALS AND METHODS**

### 13 **Data source and search strategy**

14 We followed the Preferred Reporting Items for Systematic Reviews and Meta-Analyses (PRISMA)  
15 Guidelines<sup>11</sup>. A systematic literature search was performed in the PubMed and OVID-MEDLINE  
16 databases by two authors (DB and SA) to identify articles reporting epidemiology data on CKD in  
17 the adult population in any geographic area of the African continent. This employed focused, highly  
18 sensitive search strategies (S1 Table). The search covered the time frame from January 1<sup>st</sup>, 1995 to  
19 April 7<sup>th</sup>, 2017. Papers without language and study design restrictions were located and screened.  
20 References from relevant studies were screened for supplementary articles.

### 21 **Study selection and data extraction**

22 Titles and abstracts were screened independently by two authors (SA and GD), who discarded  
23 studies that were not relevant to the topic. Case reports, reviews, editorials, letters, and studies  
24 focusing on African-Americans not living on the African continent, conducted entirely among  
25 children, or dealing with acute kidney injury or kidney transplantation were excluded. Two authors  
26

1  
2  
3  
4  
5  
6  
7  
8  
9  
10  
11  
12  
13  
14  
15  
16  
17  
18  
19  
20  
21  
22  
23  
24  
25  
26  
27  
28  
29  
30  
31  
32  
33  
34  
35  
36  
37  
38  
39  
40  
41  
42  
43  
44  
45  
46  
47  
48  
49  
50  
51  
52  
53  
54  
55  
56  
57  
58  
59  
60

(SA, ED) independently assessed the retrieved abstracts and the full texts of these studies to determine eligibility according to the inclusion criteria. Disagreements were resolved through discussion and consensus, or through consultation with a third reviewer (DB), who solved these differences based on study judgments. Furthermore, screening of reference lists of all of the retrieved studies was conducted to check for relevant articles, and a supplementary scan of the reference lists of the systematic reviews was performed to identify any additional studies. Data were extracted from full-text articles and registered using a specifically designed form. These data included study design, geographical area, sample size, the definition of CKD used, prevalence of CKD, age, gender, GFR measurement, type of creatinine assay, proteinuria, the method of outcome assessment and associated comorbidities such as diabetes mellitus and hypertension. Data extraction was performed by one reviewer (SA) and independently verified by another reviewer (DB).

## Data extraction and analysis

Studies were categorized according to the reference population as follows: 1) studies dealing with the general population and 2) studies focusing on particular diseases such as diabetes, hypertension, lupus and HIV or settings, e.g., hospital- based surveys and occupational studies.

Information on the assessment of kidney function was collected, including: the equation adopted for GFR estimation ((Cockcroft-Gault(CG), Modification of Diet in Renal Disease (MDRD), Chronic Kidney Disease-Epidemiology Collaboration (CKD-EPI)), the type of creatinine assay (Jaffe, standardized or unknown), and the type of proteinuria or albuminuria assay used (semi-quantitative assessment by urinary strips or quantitative in urine samples or 24 h collection). When the study included two or three GFR equations, we defined the CKD prevalence based on the CKD-EPI equation whenever this information was provided. Otherwise, we considered the MDRD equation and lastly the CG equation. In the case of ethnicity correction<sup>12-14</sup>, we included the equation which corrected for ethnicity. Information on the definition of CKD used in each study was also included ((either the internationally accepted definition as Kidney Disease Outcome Quality Initiative (KDOQI), or other ways of defining CKD)).

## Quality assessment

Two independent authors (SA and DB) appraised each article independently and assessed its quality based on standard criteria described into details in previous methodology reviews dealing with clinical trials<sup>15</sup>, diagnostic studies<sup>16</sup>, and observational studies<sup>17</sup>. The articles were assessed based on the subject sampling and precision, sampling technique, response rate, method of assessment of kidney function, and exclusion rate

## Statistical analyses

The principal demographic and clinical data for each study were summarized as the mean and standard deviation or as absolute number and percentage, as appropriate. The age range in each study was also recorded. The range of the CKD prevalence for each study group was reported. The pooled prevalence rate of CKD was expressed as a point estimate and 95% CI. The prevalence from each study was weighed by the sample size then the pooled prevalence was categorized by the African region. The inter-rater agreement for inclusion and quality assessment was determined using Cohen's kappa ( $\kappa$ ) coefficient<sup>18</sup>. The percentage of the different causes of CKD was weighed by the sample size of each study done among CKD patients. Then we simply summed the number of patients for each etiological factor and divided it by the total sample size from the whole included studies. No meta-analysis was conducted in this study. Data were appropriately presented for different populations (general population and CKD patients). The patients' data were stratified by the type of underlying condition, i.e., hypertension, diabetes mellitus, HIV, or systemic lupus erythematosus. All calculations were conducted using SPSS for Windows, version 21, Chicago, Illinois, USA.

## RESULTS

### Search results

The flow diagram of the selection process is depicted in (Fig. 1). In total, 7897 potentially relevant



1  
2  
3 1 references were initially retrieved. Twenty-one additional citations were found through a personal  
4  
5 2 search. By screening titles and abstracts, a total 7534 citations were excluded because of search  
6  
7 3 overlap, dealing with the wrong population (African American, AKI, cancer or post-transplant  
8  
9 4 patients), or not providing actual data on CKD. Review articles, case reports, editorials, or letters  
10  
11 5 were also excluded. Amongst the 384 studies selected for full text examination, 232 were excluded  
12  
13 6 because they dealt with a population different from that specifically targeted in this systematic  
14  
15 7 review, such as paediatric populations (122 studies), transplant patients (n=44), or others (n=46)  
16  
17 8 (e.g., Africans living in non-African countries), or because only narrative data were provided  
18  
19 9 (n=20). A total 152 articles were therefore reviewed in detail and included in the analysis. The main  
20  
21 10 characteristics of these studies are summarized in Table 1. The inter-rater agreement for inclusion  
22  
23 11 was  $\kappa=0.90$  and for the quality assessment was  $\kappa=0.85$ .

## 27 **Study characteristics**

28  
29  
30 13 Amongst the 152 studies reviewed, 29 were general population studies (Table 2). One-  
31  
32 14 hundred twenty-three studies focused on selected groups, of which 42 included HIV patients (Table  
33  
34 15 3), 18 studied diabetic patients (Table 4), nine included hypertensive subjects (Table 5) and twelve  
35  
36 16 were conducted in other populations (Table 6), including one study in lupus patients<sup>19</sup>, one study in  
37  
38 17 rheumatoid arthritis patients<sup>20</sup>, one study among sickle cell anemia patients<sup>21</sup>, two in specific  
39  
40 18 occupational settings (silica exposure<sup>22</sup> and exposure to the nephrotoxic hair-dye,  
41  
42 19 paraphenylenediamine<sup>23</sup>) and seven studies in family practice<sup>24-26</sup> or hospital-based<sup>27-30</sup> surveys.  
43  
44 20 Forty-two studies conducted among CKD patients (S2 Table)<sup>31-72</sup>.

45  
46  
47  
48 21 The studies that were included covered all regions of Africa. The highest number of the studies  
49  
50 22 came from the Western macro-area (n=54), followed by the Eastern macro-area (n=32), Southern  
51  
52 23 macro-area (n=25). Twenty studies were retrieved from the Northern Africa, eight studies from  
53  
54 24 each of the Central macro-area and the Central-Western macro- area. Three studies were conducted  
55  
56 25 in both the Eastern and Southern regions and two studies in the Sub-Saharan region.  
57  
58  
59  
60

## 1 **Assessment of kidney function impairment**

2 Urinary markers for kidney disease were assessed in seventy-eight (71%) among one-  
3 hundred ten studies conducted in the general population, high risk groups, occupational or hospital-  
4 based studies. Proteinuria was assessed by a semi-quantitative method (urinary strips) in twenty-  
5 eight studies<sup>21, 24, 26, 29, 73-96</sup>. Twenty studies used dipstick with confirmation by quantitative  
6 methods, nine of which used dipsticks to identify proteinuria/albuminuria with confirmation by 24-  
7 hour proteinuria<sup>25, 97-104</sup> whereas eleven studies used dipstick with confirmation by the protein-to-  
8 creatinine ratio or albumin-to-creatinine ratio<sup>105-115</sup>. Quantitative methods for the assessment of  
9 proteinuria/albuminuria (24-hour proteinuria or albuminuria, PCR, immunoassay, or ACR) were  
10 applied in twenty-nine studies<sup>19, 27, 28, 30, 116-140</sup>. In one study, the method of proteinuria assessment  
11 was not mentioned<sup>141</sup>.

12 Serum creatinine was measured in ninety-five studies (86%). The Jaffe assay was used in  
13 thirty studies<sup>29, 30, 76, 80, 82, 83, 86, 90, 95, 97, 102, 105, 111, 113, 124, 126, 130, 131, 136, 142-152</sup> whereas the IDMS-  
14 calibrated method was used in fifteen studies<sup>12, 14, 21, 26, 115, 117, 132-134, 141, 153-157</sup>. In nine studies, both  
15 the Jaffe assay and the calibrated serum creatinine were used<sup>13, 20, 25, 91, 98, 99, 106, 112, 158</sup>. In the  
16 remaining forty-one studies provided no information on the method of creatinine measurement<sup>19, 24,</sup>  
17 <sup>27, 28, 78, 79, 81, 84, 85, 87-89, 93, 94, 96, 100, 101, 104, 109, 114, 116, 118-122, 125, 127, 135, 137-139, 159-167</sup>. With respect to the  
18 formula used for estimating GFR, the MDRD equation was used in thirty studies<sup>24-26, 28, 29, 94-97, 105,</sup>  
19 <sup>106, 111, 113, 116, 117, 121, 122, 126, 130, 133, 134, 136, 141, 146, 149, 153, 154, 158, 159, 164</sup> and the CG equation was used in  
20 eighteen<sup>19, 76, 81, 86-88, 93, 100, 102, 114, 119, 124, 138, 143, 145, 150, 162, 167</sup>. The other fourteen studies used both  
21 the CG and the MDRD equations<sup>78-80, 83-85, 98, 99, 101, 144, 147, 152, 161, 163</sup>, whereas fifteen studies  
22 estimated GFR by the CG, MDRD, and the CKD-EPI methods<sup>12-14, 20, 82, 90, 91, 109, 112, 115, 139, 142, 155, 156,</sup>  
23 <sup>160</sup>. Six studies used MDRD and CKD-EPI<sup>131, 132, 137, 148, 151, 157</sup> and two studies used CKD-EPI<sup>21</sup>  
24 <sup>166</sup>. In other two studies the formula was not mentioned<sup>30, 135</sup>.

## 1 Definition of CKD

2 Thirty-one studies defined the presence of CKD as an eGFR below 60 ml/min/1.73 m<sup>2</sup> <sup>12,14</sup>  
3 <sup>,20,80,93-96,111,117,119,139,146,148-159,161-164,166,167</sup>, with chronicity confirmed by repeated testing in four  
4 other studies <sup>142-145</sup>. Moreover, twenty-eight studies reported CKD prevalence based on eGFR  
5 below 60 ml/min/1.73 m<sup>2</sup> and/or the presence of proteinuria or albuminuria <sup>21,24,26,76,78,82-84,86,91,99</sup>  
6 <sup>,100,105,106,109,112-114,121,130-137,141</sup>. Proteinuria/albuminuria was used alone to identify CKD in  
7 fourteen studies <sup>73-75,77,87,92,107,108,110,123,128,129,138,140</sup>. KDOQI staging <sup>168</sup> of CKD was used in  
8 thirteen studies <sup>13,25,29,79,85,90,97,98,115,116,122,124,126</sup>. The serum creatinine level (either doubling, or  
9 an increase above a certain threshold) was considered to be a marker of the presence of CKD in four  
10 studies <sup>89,104,120,165</sup>. In sixteen studies, the definition of CKD was either not mentioned or was  
11 defined in various ways, including personal history, Creatinine Clearance (CrCl) ≤50 ml/min,  
12 clinical manifestations, the presence of albuminuria, elevated serum creatinine, and the average of  
13 two measurements of eGFR < 90 ml/min/1.73 m<sup>2</sup> <sup>2,19,27,28,30,81,88,101-103,118,125,127,147,160,169,170</sup>.

## 14 Paper quality

15 Paper quality was high in sixteen studies <sup>13,25,75,90,91,97,98,105,106,112,116,132-134,148,155</sup>. Thirty-five  
16 studies were of medium quality <sup>12,14,26,29,73,74,77-79,81,82,96,110,111,115,117,128,130,131,137,141,143-145,150-</sup>  
17 <sup>152,154,157,159-161,163,166,167</sup>. The rest of the studies were of low quality.

## 18 Prevalence of CKD

19 The included medium/ high quality studies in the general population in Africa provided  
20 estimates of CKD prevalence by disparate criteria **Table 2**. The prevalence of CKD ranged from  
21 2% to 41% (pooled prevalence: 10.1%; 95% CI: 9.8%-10.5%). The prevalence was reported to  
22 range from 2 % to 41% ( pooled estimate 16.5%) in the West/Central-West, followed by the  
23 Central region where the prevalence ranged from 12-17 % ( pooled estimate 16%), Southern (CKD  
24 prevalence range 6% to 29%, pooled estimate 12.2%), in Eastern, prevalence ranged from 7% to  
25 15% ( pooled estimate 11.0%), and North where the prevalence ranged from 3-13% ( pooled

1  
2  
3 1 estimate 4%) Africa (Fig. 2). In Sub-Saharan Africa, the prevalence ranged from 2-14 (Pooled  
4 prevalence: 14.02% ;95% CI: 13.5- 14.5 %).In studies defining CKD as eGFR<60 ml/min; the  
5 prevalence of CKD ranged from 7%- 29% (pooled estimate 13.2%) while in those who adopted  
6 the combined criterion GFR<60 ml/min/1.73 m<sup>2</sup> and/or the presence of proteinuria or albuminuria,  
7 the prevalence ranged from 3% to 22% (pooled estimate 5.6%). When defined according to  
8 KDOQI, the prevalence ranged from 2% to 28% (pooled estimate 10.8%). Finally, in studies  
9 reporting on proteinuria/albuminuria only, the prevalence ranged from 3% to 41% (pooled estimate  
10 18.9%). The CKD prevalence for each age or gender group was not reported in the majority of the  
11 studies. In **Fig. S1** we show graphically the relationship between gender and age and CKD  
12 prevalence in the medium-high quality studies of this systematic review.

13  
14  
15  
16  
17  
18  
19  
20  
21  
22  
23  
24  
25  
26  
27  
28  
29  
30  
31  
32  
33  
34  
35  
36  
37  
38  
39  
40  
41  
42  
43  
44  
45  
46  
47  
48  
49  
50  
51  
52  
53  
54  
55  
56  
57  
58  
59  
60

11 Among HIV patients (**Table 3**), the prevalence of CKD in the eighteen medium quality  
12 studies ranged from 1% to 46% (pooled prevalence 5.6%; 95% CI: 5.4-5.8%). The prevalence of  
13 CKD in the West/ Central-West ranged from 9% to 39% ( pooled estimate 11.6%) and the East,  
14 where the prevalence ranged from 1% to 46% (pooled estimate 11.2%), areas had a seemingly  
15 similar figures which was higher than in the South (3.5%) macro-areas. Based on the treatment  
16 status, the prevalence of renal dysfunction ranged from 1 to 47% (pooled prevalence 9.9%; 95 %  
17 CI: 9.4- 10.4%) among HIV patients not receiving treatment while it ranged from 7% to 33%  
18 (pooled prevalence: 5.2%; 95 % CI: 5.0-5.4%) among HIV patients on anti-retroviral therapy. The  
19 prevalence was reported to be 5.7% ( range: 3.1-7.2%) among the 3 studies done in both the East  
20 and South macro- areas and 2.5% from the study done in the sub-Saharan area. According to the  
21 definition; the prevalence of CKD ranged from 1% to 18% (pooled estimate 4.7%) in studies which  
22 defined CKD as eGFR< 60ml/min. In studies which defined CKD as eGFR < 60 ml/min/1.73 m<sup>2</sup>  
23 and/or the presence of proteinuria or albuminuria, the CKD prevalence ranged from 9% to 21%  
24 (pooled estimate 5.6%). There are other four studies which defined CKD based on either the  
25 presence of proteinuria, KDOQI, CrCl< 50 ml/min, or albuminuria and serum creatinine. In these 4  
26 studies, the prevalence of CKD ranged from 3 % to 46% (pooled estimate 12.6%). The CKD

1  
2  
3  
4  
5  
6  
7  
8  
9  
10  
11  
12  
13  
14  
15  
16  
17  
18  
19  
20  
21  
22  
23  
24  
25  
26  
27  
28  
29  
30  
31  
32  
33  
34  
35  
36  
37  
38  
39  
40  
41  
42  
43  
44  
45  
46  
47  
48  
49  
50  
51  
52  
53  
54  
55  
56  
57  
58  
59  
60

prevalence for each age or gender group was not reported in the majority of the studies. In **Fig. S1** we show graphically the relationship between gender and age and CKD prevalence among HIV patients in the medium-high quality studies

Among diabetic patients (**Table 4**, all studies are of low quality except for four with medium quality), the prevalence of CKD ranged from 11% to 90% (Pooled prevalence: 24.7%; 95%CI: 23.6-25.7%). The highest prevalence was in the Eastern, ranged from 18% to 84% (pooled estimate 46.9%), followed by the Central where the CKD prevalence ranged from 30 % to 66% ( pooled estimate 40.8%). In the West/Central-West, CKD prevalence ranged from 18% to 90% (pooled estimate 27.7%), while in South the CKD prevalence ranged from 18% to 66% ( pooled estimate 23.0%), and in North, CKD prevalence ranged from 11% to 20% ( pooled estimate 18.9%) Africa. One study was done in sub-Saharan reported that the prevalence was 13%. Among diabetic patients; CKD prevalence ranged from 11% to 83% (pooled estimate 51.8%); when CKD defined as eGFR < 60 ml/min/1.73 m<sup>2</sup> and/or the presence of proteinuria or albuminuria. When CKD was defined based on proteinuria/albuminuria, CKD prevalence ranged from 26% to 51 % ( pooled estimate 36.3%). In diabetic patients who had CKD based on eGFR < 60 ml/min/1.73 m<sup>2</sup>; the prevalence ranged from 13% to 30% (pooled estimate 16.6%). When KDOQI was used to define CKD, the prevalence of CKD ranged from 19% to 66% (pooled estimate 34.2%). The CKD prevalence for each age or gender group was not reported in the majority of the studies. In **Fig. S1** we show graphically the relationship between gender and age and CKD prevalence among diabetic patients in the included studies

The prevalence of CKD among hypertensive patients (**TABLE 5**, 9 studies; all of low quality except for two with medium quality) ranged from 13% to 51% (pooled prevalence: 34.5%; 95 % CI: 34.04%-36%). The highest prevalence was reported from one study in the East macro-area (39.5%) followed by the West/Central-West, where the prevalence ranged from 13% to 51% (pooled estimate 37.7%). In South Africa, the CKD prevalence, which was reported from one study

1 was 25.4%. No data were found for other African macro-areas. In studies which defined CKD as  
2 eGFR < 60 ml/min/1.73 m<sup>2</sup>, the prevalence of CKD ranged from 38.5% to 40% ( pooled estimate  
3 38.9%). When serum creatinine was used to define CKD, the prevalence ranged from 30% to 51%  
4 (pooled estimate 40.3%). When CKD was defined according to albuminuria/ proteinuria , the  
5 prevalence of CKD ranged from 15% to 25% (pooled estimate 23.6%). In one study, CKD was  
6 define according to KDOQI criteria and it was prevalent among 47% of hypertensive patients. The  
7 CKD prevalence for each age or gender group was not reported in the majority of the studies. In  
8 **Fig. S1** we show graphically the relationship between gender and age and CKD prevalence among  
9 diabetic patients in the included studies

10 Among other patient populations (studies reported in Table 6), almost three quarters of the  
11 lupus patients had CKD (prevalence=72.0%) based on low quality study<sup>19</sup>. Hospital-based surveys  
12 revealed that ( the calculation was based on **the total prevalence** reported from all studies including  
13 three of high-medium quality and 4 of low quality in the same table ) more than one third of  
14 patients attending either primary care centres or tertiary hospitals had CKD (range: 11-57%, pooled  
15 prevalence= 36%, 95% CI: 34.4-37.7%). In hospital based studies when CKD was defined as  
16 eGFR < 60 ml/min/1.73 m<sup>2</sup> and/or the presence of proteinuria or albuminuria; the prevalence  
17 ranged from 10% to 14% (pooled estimate 12.4%), while the prevalence ranged from 49% to 57%  
18 (pooled estimate 45.1%) when CKD defined according KDOQI. Chronic kidney disease was  
19 prevalent among almost 39% of rheumatoid arthritis <sup>20</sup>or sickle cell patients<sup>21</sup>. The study (low  
20 quality) conducted among hairdressers exposed to paraphenylenediamine<sup>104</sup> reported that 26.4% of  
21 these subjects had renal impairment. Of note, 100% of silica-exposed workers experienced  
22 proteinuria ( reported from low quality study)<sup>129</sup>.

## 24 Causes of CKD

25 Forty-two studies were conducted specifically to clarify the underlying cause of CKD <sup>31-72</sup>. (S2  
26 Table) The diagnosis was biopsy-proven in seventeen studies<sup>33 ,39 ,41 ,43-45 ,48 ,54 ,55 ,58 ,60 ,63 ,67-70 ,72</sup>.

1  
2  
3 1 Vascular/hypertensive sclerosis was the main cause of CKD (16%) followed by diabetic  
4  
5 2 nephropathy (15%), chronic glomerulonephritis (13%), tubulo-interstitial/obstructive (8%), primary  
6  
7 3 glomerular diseases (6%), systemic lupus erythmatosus (3%), and polycystic kidney disease (3%).  
8  
9 4 The causes of CKD were undetermined/miscellaneous causes in one fifth of the patients (20%).  
10  
11 (Fig. 3)  
12

## 13 14 **DISCUSSION** 15

16  
17 7 This systematic review focuses on the burden of CKD on the entire African continent. We assessed  
18  
19 8 152 papers published between January 1<sup>st</sup>, 1995 until April 7<sup>th</sup>, 2017, reporting the epidemiology of  
20  
21 9 CKD in the general population and in specific chronic conditions in Africa. The CKD prevalence  
22  
23 10 reported in our review should be interpreted with caution. Our estimates may be affected by the  
24  
25 11 analytical heterogeneity used to measure creatinine and albuminuria. Serum creatinine  
26  
27 12 concentrations are affected by intra-individual variability with over 20% changes within a 2-week  
28  
29 13 period<sup>171</sup> and most Jaffe assays overestimate serum creatinine<sup>172</sup>. The resulting bias could vary  
30  
31 14 according to the creatinine concentration, specific assay, manufacturer, and calibration material  
32  
33 15 used. Although the IDMS calibration standardization has reduced the bias and improved the Inter  
34  
35 16 laboratory comparability<sup>173</sup>, the number of studies reported using IDMS was low in Africa.  
36  
37 17 Moreover, CKD prevalence may additionally be influenced by albuminuria assays which are  
38  
39 18 affected by the inter laboratory differences<sup>174</sup>. The different equations used to estimate GFR could  
40  
41 19 be a source of bias. The systematic underestimation of measured GFR at higher estimated GFR by  
42  
43 20 the MDRD equation is well known, and may reflect higher creatinine generation in healthy  
44  
45 21 individuals compared with individuals with CKD in whom the MDRD equation was derived. This  
46  
47 22 bias is reduced substantially, but not completely, by the CKD-EPI equation, which was derived  
48  
49 23 from studies including people without CKD<sup>175</sup>. In addition, differences in sample size,  
50  
51 24 demographics, and clinical characteristics, are all significant limitations in this systematic review  
52  
53 25 for making accurate estimates of the prevalence of CKD in African countries. Age and gender are  
54  
55  
56  
57  
58  
59  
60

1 well known determinants of the risk of CKD development, progression and complication. While the  
2 prevalence of CKD tends to be higher in women, the disease is more severe in men, who also have  
3 a higher risk of all-cause and CVD mortality across different levels of renal function. However, the  
4 risk relationships of reduced eGFR and higher albuminuria with mortality were steeper in women  
5 than in men. Moreover, the risk of progression to ESRD at a given eGFR rate and urinary albumin-  
6 creatinine ratio seemed equivalent in men and women<sup>176,177</sup>. The lack of information on the  
7 prevalence of CKD by age and gender in studies included in this systematic review, only  
8 11% of the included studies reported CKD prevalence by either age or gender groups, limits the  
9 value and the reliability of pooled estimates of CKD prevalence in Africa and in its macro-areas.  
10 To circumvent this limitation we showed the prevalence of CKD in the various studies in  
11 relationship to the proportion of males and age in the same studies. However the number of  
12 studies is too small for reliably capturing the effect of age and gender on CKD prevalence in  
13 Africa. Furthermore, only five studies<sup>79,142-145</sup> assessed the KDOQI chronicity criterion, which  
14 is a fundamental element of the current definition of CKD by this organization. A single  
15 elevated serum creatinine, reduced eGFR or an abnormal urinalysis should initially be viewed as a  
16 screening test, and the diagnosis of CKD should be confirmed with repeated tests, additional  
17 workup and clinical judgment<sup>178</sup>. Thus, estimates in this review should be seen as a pragmatic  
18 attempt to evaluate the dimension of CKD as a public health issue on the African continent.

19 CKD is now considered to be an important component of the epidemic of non-communicable  
20 diseases in economically developed and developing countries alike. In a seminal meta-analysis  
21 published in 2014 Stanifer et al.,<sup>9</sup> for the first time drew attention to the public health  
22 relevance of CKD in the sub-Saharan Africa, a vast area comprising 85% (947.4 million) of  
23 the whole African population<sup>9</sup>. In the present systematic review, the lowest prevalence of CKD  
24 (4%) was reported in the Northern Africa macro-area; including Egypt, Libya, Tunisia, Algeria,  
25 Morocco, the Western Sahara, and Mauritania, and the highest (16.5%) was observed in West/  
26 Central-West Africa, which includes Benin, Burkina Faso, the island nation of Cape Verde,



1  
2  
3 1 Gambia, Ghana, Guinea, Guinea-Bissau, Ivory Coast, Liberia, Mali, Mauritania, Niger, Nigeria,  
4  
5 2 Cameroon, the island of Saint Helena, Senegal, Sierra Leone, São Tomé and Príncipe and Togo.  
6  
7 3 The average prevalence in the entire African continent was 10.1%. The global CKD prevalence  
8  
9 4 was reported to be 13.4%<sup>179</sup>. In sub-Saharan Africa in Stanifer's meta-analysis, the prevalence of  
10  
11 5 CKD was 13.2%<sup>9</sup>, which is close to that reported in the same area in our review (14.02%). Among  
12  
13 6 the general population of economically developed countries, CKD has 13.6% prevalence in the  
14  
15 7 USA<sup>180</sup>. In Europe, the reported prevalence is lower and more homogenous, being 8.9% in the  
16  
17 8 Netherlands, 6.8% in Italy, 5.2% in Portugal, 4.7% in Spain, and 3.3% in Norway<sup>181</sup>. CKD  
18  
19 9 prevalence in some Asian countries was higher than the estimates in the USA and in Europe, being  
20  
21 10 17.5% in Thailand<sup>182</sup>, 15% in India<sup>183</sup>, 13% in Japan<sup>184</sup>, 11.9% in Taiwan<sup>185</sup>, and 9.9% in China<sup>186</sup>.  
22  
23 11 Overall, the estimated prevalence of CKD at the general population level in African countries  
24  
25 12 appears to be comparable and possibly even higher than that reported in other continents. This may  
26  
27 13 be at least in part due to the low quality data for the prevalence of CKD in Africa related to poor  
28  
29 14 sampling techniques, unreliable kidney function measurements, and the different definitions used.  
30  
31  
32  
33

34 15 In our review, the prevalence of CKD in surveys based on hospitals or primary care centres  
35  
36 16 (36 %) is close to that in Swiss primary care centres (36%)<sup>187</sup>.  
37

38 17 Poverty-related factors such as infectious diseases secondary to poor sanitation, inadequate  
39  
40 18 supply of safe water, environmental pollutants and high concentrations of disease transmitting  
41  
42 19 vectors continue to play an important role in the development of CKD in low-income countries.  
43  
44 20 Although rates of diabetic nephropathy are rising, chronic glomerulonephritis and interstitial  
45  
46 21 nephritis are among the principal causes of CKD in many countries<sup>188</sup>.  
47  
48

49 22 In Africa, infectious diseases such as HIV, bilharziasis, malaria, hepatitis B and C represent  
50  
51 23 an almost unique cluster of risk factors responsible for CKD<sup>189</sup>. HIV/AIDS is pandemic in Africa,  
52  
53 24 with a prevalence ranging from 0.5% in Senegal<sup>190</sup> to 27.4% in Swaziland<sup>191</sup>. The global success in  
54  
55 25 bringing effective antiretroviral treatment (HAART) to HIV-infected patients in Africa has  
56  
57 26 determined the emergence of chronic medical illnesses such as HIV-related CKD<sup>192</sup>. Up to 50% of  
58  
59  
60

1 kidney diseases in HIV-infected persons result from a wide array of non-HIV-associated  
2 nephropathy (HIVAN) pathologies, ranging from glomerulonephritis to diabetic nephropathy<sup>193</sup>.  
3 We found that 5.6% of HIV patients complained of renal dysfunction. This figure is lower than that  
4 reported in economically developed countries such as France, USA, China, Spain, and Brazil<sup>194-198</sup>.  
5 CKD was higher among HIV patients not receiving HAART compared to those on HAART.  
6 Variation in the proportion of HIV patients affected by CKD depends on the heterogeneity in the  
7 definition used to determine renal dysfunction, the proportion of the study population on HAART,  
8 diverse ethnicities, the associated comorbidities, and the nutritional status of the study population.  
9 HIV patients are more prone to nutritional deficiencies due to mal-absorption, impaired oral intake,  
10 and the wasting syndrome. Increased availability of HAART has led to some improvement of the  
11 nutritional status of patients. However, for certain individuals, undernutrition and weight loss  
12 persist despite therapy. Malnutrition exacerbates side effects, alters drug pharmacokinetics, and  
13 impinges on adherence thereby limiting the beneficial effects of the therapy<sup>199</sup>. Furthermore,  
14 differences in HIV clades or strains in African patients<sup>200</sup> and genetic factor<sup>201</sup> may influence the  
15 replication capacities within the isolated renal reservoir and thus lead to a diversity in clinical  
16 presentations<sup>80</sup>.

17       Regarding systemic autoimmune diseases such as lupus, a study conducted among lupus  
18 patients from Senegal showed that almost three quarters (71.0%) the patients with this disease had  
19 evidence of renal involvement<sup>19</sup>. This isolated figure is higher than that reported in other  
20 countries<sup>202-204</sup>. More than one third (39%) patients with rheumatoid arthritis had CKD<sup>20</sup> which is  
21 higher than that reported from Taiwan<sup>205</sup>.

22       Even though there are no sufficient data to precisely reconstruct historical trends, the profile  
23 of CKD causes has changed during the last decades. Interstitial nephritis and glomerulonephritis  
24 were the main causes of CKD in North Africa<sup>206</sup> and CKD was principally caused by chronic  
25 glomerulonephritis and hypertension in East and Tropical Africa<sup>207,208</sup>. Today, the spectrum of  
26 causes of CKD in Africa is dominated by diabetes mellitus and hypertension<sup>209</sup>. We found that the

1  
2  
3  
4  
5  
6  
7  
8  
9  
10  
11  
12  
13  
14  
15  
16  
17  
18  
19  
20  
21  
22  
23  
24  
25  
26  
27  
28  
29  
30  
31  
32  
33  
34  
35  
36  
37  
38  
39  
40  
41  
42  
43  
44  
45  
46  
47  
48  
49  
50  
51  
52  
53  
54  
55  
56  
57  
58  
59  
60

1 prevalence of vascular/hypertensive and diabetic nephropathies as a cause of CKD (16% and 15%,  
2 respectively) exceeded that caused by chronic glomerulonephritis (13%).

3 Our review has both strengths and limitations. The major strengths include a thorough  
4 systematic search of electronic databases and the inclusion of all comprehensive studies with a  
5 transparent assessment of CKD prevalence by two independent reviewers. The fact that our  
6 literature search was limited to PubMed and Medline OVID but did not include the African  
7 Index Medicus, like it was done by Stanifer in the meta-analysis of CKD in sub-Saharan Africa  
8 [8], is a limitation of our study. Because there was a huge discrepancy in the definitions used to  
9 identify CKD, the methods of creatinine measurement, urine protein assessment, and in the quality  
10 of the reporting, we decided to adopt an inclusive strategy. Our primary interest was to identify all  
11 studies conducted among different population groups in Africa providing information on CKD and  
12 to reconstruct a tentative scenario of the epidemiological dimension concerning disease in the entire  
13 African continent. Methodological limitations notwithstanding this review compiled estimates  
14 suggesting that the CKD burden in Africa is at least as concerning as that in economically-  
15 developed countries. The lack of a consistent definition of CKD makes it difficult to compare the  
16 burden of CKD across studies in various countries. Moreover, the failure to demonstrate chronicity  
17 when defining CKD is a common limitation of studies investigating CKD prevalence in Africa. It  
18 was reported that a single test in time has an extremely poor positive predictive value for  
19 confirmation of CKD compared to repeated testing 3 months later. Failure to repeat testing may  
20 lead to a significant overestimation of CKD prevalence and underestimation of the burden of CVD  
21 in CKD<sup>210</sup>. In addition, Observational studies are subject to bias and residual confounding which are  
22 difficult to account for and there are limitations due to the heterogeneity that arises from differences  
23 in age and sex distributions. These poor data quality reported in different studies is considered as a  
24 cumbersome problem limiting the accuracy in assessing the burden of CKD in Africa

25 In conclusion, CKD in Africa appears to be at least as common as in other continents and as  
26 such, it constitutes a true public health priority with major cost burden to healthcare systems

1  
2  
3 1 worldwide. Targeted screening of high-risk groups (including those with hypertension, diabetes  
4  
5 2 mellitus, HIV patients and persons with occupational exposures) should likely be instituted as the  
6  
7 3 first step in kidney disease prevention whenever and wherever affordable and feasible. Education to  
8  
9 4 increase awareness of CKD among healthcare workers and patients, and the promotion of healthy  
10  
11 5 life styles, should be engrained in preventive programs. The treatment of hypertension and diabetes  
12  
13 6 mellitus are of obvious relevance. Nurses and other health workers should be trained to manage  
14  
15 7 these conditions at the local level if we are to curb the incidence of CKD and to avert the added  
16  
17 8 burden of CKD complications to diabetes, hypertension, and infectious diseases, the deadly trio of  
18  
19 9 risk factors underlying the CKD epidemic in Africa.  
20  
21  
22  
23  
24  
25  
26  
27  
28  
29  
30  
31  
32  
33  
34  
35  
36  
37  
38  
39  
40  
41  
42  
43  
44  
45  
46  
47  
48  
49  
50  
51  
52  
53  
54  
55  
56  
57  
58  
59  
60

1  
2  
3  
4  
5  
6  
7  
8  
9  
10  
11  
12  
13  
14  
15  
16  
17  
18  
19  
20  
21  
22  
23  
24  
25  
26  
27  
28  
29  
30  
31  
32  
33  
34  
35  
36  
37  
38  
39  
40  
41  
42  
43  
44  
45  
46  
47  
48  
49  
50  
51  
52  
53  
54  
55  
56  
57  
58  
59  
60

### 1 FUNDING STATEMENT:

2 Samar Abd ElHafeez was granted an European Renal Association-European Dialysis and  
3 Transplantation Association (ERA-EDTA) fellowship at CNR-IFC/IBIM, Clinical Epidemiology  
4 and Physiopathology of Renal Disease and Hypertension of Reggio Calabria, Italy, and this work  
5 was completed during her training.

6 This article was written by in the framework of the Advisory Program of the ERA-EDTA YNP  
7 (Young Nephrologists' Platform) which is an official body of the ERA-EDTA (European Renal  
8 Association - European Dialysis and Transplant Association).

9 Dr. Samar Abd ElHafeez was an advisee of ERA-EDTA YNP Adviser-Advisee Program (Adviser  
10 Dr. Davide Bolignano)."

11  
12 **COMPETING OF INTERESTS:** Not declared.

### 14 AUTHORS' CONTRIBUTIONS:

15 SA, DB, and CZ: conceptualized and designed the study.

16 SA, GD, and ED: participated in revising the articles included in the review and retrieved the  
17 necessary information.

18 DB and GT: supervised the data capture and analysis.

19 SA, DB, and GT: analysed and interpreted the data.

20 SA, DB, and CZ: drafted and critically revised the manuscript.

21 All of the authors read and approved the final manuscript.

22  
23 **DATA SHARING STATEMENT:** No additional data are available.

### 25 ACKNOWLEDGEMENTS

26 We would like to thank the following professors and physicians for their help in providing the  
27 articles we evaluated in our review:

28 Prof. Olutayo Alebiosu, Prof.Ahmed Donia, Prof. Rashad Barsoum, Prof. Carel IJsselmuiden,  
29 Prof. Laurent Forcard, Prof. Anatole Laleye, Prof. Nestor Pakasa, Prof. Imaobong Etuk, Prof.  
30 Ifeoma Ulasi, Prof. Abubakr Abefe Sanusi, Prof. Gbenga Ayodele, Prof. Raida S. Yahya, Prof.  
31 Mohammed Benghanem Gharbi, Prof. Fatma Ben Moussa, Dr.Ikechi Okpechi, Dr. Alaya Akram,  
32 Dr.Adebawale Ademola,Dr. Oluyombo Rotimi,, Dr.K S Nayak, Dr. Guy Neild, Dr.Rasheed  
33 Gbadegesin, Dr.Sidy Mohamed Seck, Dr. Amr El-Husseini Mohamed, Dr.Fasika M. Tedla, Prof.  
34 Adewale Akinsola, Prof. Olanrewaju Adedoyin, Dr.Halle Marie Patrice, Dr. Emmanuel Agaba,  
35 Prof. Miriam Adhikari, Dr. B.T Bello, Dr.Zidane Djelloul

**Table 1: Characteristics of the study population included in the analysis**

| Study population         | Number of the studies | Study characteristics                                                                                             |
|--------------------------|-----------------------|-------------------------------------------------------------------------------------------------------------------|
| General population       | 29                    | N=30169, age ranging from 12 to 95 years; 48% males                                                               |
| Diabetic patients        | 18                    | N=9082, age ranging from 14 to 90 years; 43% males                                                                |
| Hypertensive patients    | 9                     | N=4123, age ranging from 19 to 90 years; 43% males                                                                |
| HIV patients             | 42                    | N= 67432, age ranging from 13 to 74 years; 36% males                                                              |
| Occupational group       | 2                     | N= 153, age ranging from 22 to 59 years; one study only enrolled females and the other principally enrolled males |
| Family practice patients | 7                     | N= 3250, age ranging from 20-74 years, 44% males                                                                  |
| Lupus patients           | 1                     | N= 43, age ranging from 16 to 55 years, 7% males                                                                  |
| Rheumatoid arthritis     | 1                     | N=233, age ranging from 40-70 years, 17.2% males                                                                  |
| Sickle cell anemia       | 1                     | N=194, age ranging from 12-40 years, 43.3% males                                                                  |
| CKD patients             | 42                    | N= 34236, age ranging from 12 to 90 years, 58% males                                                              |

Table 2: Studies on CKD among the general population

| Study ID                    | Year, Country, Region   | Location                                                                 | N    | Population Characteristic                                                                                                                                                                                        | Definition of CKD                | Method of outcome assessment                                                                            | Type of creatinine assay      | Proteinuria                                   | CKD prevalence                                                                     | Quality assessment |
|-----------------------------|-------------------------|--------------------------------------------------------------------------|------|------------------------------------------------------------------------------------------------------------------------------------------------------------------------------------------------------------------|----------------------------------|---------------------------------------------------------------------------------------------------------|-------------------------------|-----------------------------------------------|------------------------------------------------------------------------------------|--------------------|
| Abdelsatir S <sup>169</sup> | 2013 Sudan North-east   | All village inhabitants                                                  | 389  | Age (years): 41 ± 15<br>Male gender: 16.2%<br>Hypertension: 39.6%,<br>DM: 17%<br>BMI category: ( kg/m <sup>2</sup> )<br><18: 6.2%,<br>18-24.9: 65.8%,<br>25-29.9: 20.2 %,<br>≥30: 7.8%                           | Not identified, personal history | Personal history                                                                                        | Not mentioned                 | Not measured                                  | <b>Total prevalence (as reported): 6.40%</b>                                       | Low                |
| Fatiu A <sup>73</sup>       | 2011 Nigeria West       | Market population                                                        | 286  | Age (years): 49.5 ± 5.7<br>Male gender: 9.8%<br>Hypertension: 37.7%<br>BMI (kg/m <sup>2</sup> ): 26.76 ± 5.28<br><20 kg/m <sup>2</sup> : 7.4%<br>20-25 kg/m <sup>2</sup> : 33.4%<br>> 25 kg/m <sup>2</sup> : 59% | Proteinuria ≥ +1                 | Midstream urine sample was tested by urinary strip                                                      | Not measured                  | <b>29.70%</b>                                 | <b>Total prevalence ( based on proteinuria prevalence): 29.7%</b>                  | Medium             |
| Traore M <sup>74</sup>      | 1998 Mali West          | All Household population of the villages                                 | 1098 | Age (years): 30±12<br>Male gender: 52%                                                                                                                                                                           | Proteinuria ≥ +1                 | Microhaematuria and proteinuria by urinary strip                                                        | Not measured                  | 40.80%                                        | <b>Total prevalence ( based on proteinuria prevalence): 40.80%</b>                 | Medium             |
| Matsha T <sup>12</sup>      | 2013 South Africa South | Bellville town inhabitants                                               | 1202 | Age (years): 52.9 ± 14.8<br>Male gender: 24.7%<br>SBP: 125±20<br>DBP: 76 ± 13<br>DM: 26.4%<br>BMI: 29.9 ± 7.2                                                                                                    | eGFR < 60 ml/min                 | 4 variables: MDRD, CG, CKD-EPI                                                                          | Standardized creatinine assay | Not measured                                  | <b>Prevalence of stages 3-5: 7.4% (based on CKD-EPI with ethnicity correction)</b> | Medium             |
| Seck SM <sup>97</sup>       | 2014 Senegal West       | Two stage cluster sampling of Urban and rural inhabitants of Saint-Louis | 1037 | Age (years): 48.0 ± 16.9<br>Male gender: 40%<br>Hypertension: 39.1%<br>DM: 12.7%<br>BMI: 26.3 ± 6.8 kg/m <sup>2</sup>                                                                                            | KDOQI                            | Albuminuria by urinary strips. Positive samples were confirmed by 24-hour albuminuria, eGFR by 186 MDRD | Kinetic Jaffe                 | 5.3% albuminuria > 1 g/l                      | <b>Total prevalence: 6.1%</b>                                                      | High               |
| Pruijm M <sup>116</sup>     | 2008 Seychelles, East   | a random sex-stratified and age-stratified                               | 1255 | Age (years): range, 25-64<br>Male gender: 46%                                                                                                                                                                    | KDOQI                            | Quantitative microalbuminuria by ACR, eGFR using MDRD                                                   | Not mentioned                 | 11.4% microalbuminuria, 0.7% macroalbuminuria | <b>Total prevalence : 15.3%</b><br>Prevalence of stages 3-4 CKD 3.2%.              | High               |

|                           |                         |                                              |      |                                                                                                                                                                                                                                                                  |                                                                                                           |                                                                                                       |  |                                                 |                                                                                                                                                                                                                                                          |        |
|---------------------------|-------------------------|----------------------------------------------|------|------------------------------------------------------------------------------------------------------------------------------------------------------------------------------------------------------------------------------------------------------------------|-----------------------------------------------------------------------------------------------------------|-------------------------------------------------------------------------------------------------------|--|-------------------------------------------------|----------------------------------------------------------------------------------------------------------------------------------------------------------------------------------------------------------------------------------------------------------|--------|
|                           |                         | sample inhabitants of Seychelle              |      |                                                                                                                                                                                                                                                                  |                                                                                                           |                                                                                                       |  |                                                 |                                                                                                                                                                                                                                                          |        |
| Sumaili EK <sup>98</sup>  | 2009 Congo Central      | Multistage sampling of residents of Kinshasa | 500  | Age (years): 38.6 ± 14.4<br>Male gender: 41%<br>Hypertension: 27.6%<br>DM: 11.7%<br>BMI category:<br>25–29.9 kg/m <sup>2</sup> : 20.3%<br>≥30 kg/m <sup>2</sup> : 14.9%                                                                                          | KDOQI                                                                                                     | Proteinuria by urinary strip and 24-hour proteinuria, eGFR by CG and 175MDRD                          |  | 18% proteinuria by dipstick<br>5% (≥300 mg/day) | <b>Total prevalence:</b><br>MDRD 12.4%<br>CG 19%<br><br><b>Prevalence by stage (MDRD)</b><br>Stage 1: 2%<br>Stage 2: 2.4%<br>Stage 3: 7.8%<br>Stage 4: 0.2%                                                                                              | High   |
| Matsha T <sup>159</sup>   | 2014 South Africa South | All residents of Cape-Town                   | 320  | Age (years): mean, 56.4 (55.1–57.6, 95% CI)<br>Male gender: 22%<br>SBP: 124.7 (122.8–126.7, 95% CI) mmHg<br>DBP: 75.5 (74.2–76.7, 95% CI) mmHg<br>BMI: 31.9 (31.2–32.7, 95% CI) kg/m <sup>2</sup><br>Mean eGFR at baseline: 68.6±16.7 ml/min/1.73 m <sup>2</sup> | eGFR < 60 ml/min/1.73 m <sup>2</sup>                                                                      | eGFR- 186MDRD (4 variables)                                                                           |  | Not measured                                    | <b>Total Prevalence 28.9% by categories</b><br>eGFR>90 ml/min/1.73m <sup>2</sup> : 9.4%<br>eGFR60-90 ml/min/1.73m <sup>2</sup> : 58.7%<br>eGFR30-60 ml/min/1.73m <sup>2</sup> : 28.1%<br>eGFR<30 ml/min/1.73m <sup>2</sup> : 0.9%                        | Medium |
| Sumaili EK <sup>75</sup>  | 2008 Congo Central      | All Residents of Kinshasa                    | 3018 | Age (years): 44.3 ± 15.3<br>Male gender: 59%<br>Hypertension: 18%<br>DM: 4%                                                                                                                                                                                      | Proteinuria ≥ +1                                                                                          | Proteinuria by urinary strip                                                                          |  | 17.1%                                           | <b>Total prevalence ( based on proteinuria prevalence): 17.1%</b><br><b>Prevalence by age:</b><br>12-21 years: 8.7%<br>22-31 years: 11.4%<br>32-41 years: 18.6%<br>42-51 years: 18.2%<br>52-61 years: 18.9%<br>62-71 years : 22.4%<br>≥ 72 years : 19.7% | High   |
| Egbi OG <sup>76</sup>     | 2014 Nigeria West       | All Civil servants in Bayelsa                | 179  | Age (years): 45.2 ± 10.3<br>Male gender: 53.1%<br>SBP: 128.5 ± 17.5 mmHg<br>DBP: 81.8 ± 13.2 mmHg                                                                                                                                                                | eGFR < 60 ml/min/1.73 m <sup>2</sup> and/or presence of proteinuria of at least +1 on dipstick urinalysis | Proteinuria by urinary strip, eGFR by CG equation standardized for body surface area (BSA)            |  | 5.6%                                            | <b>Total prevalence: 7.8%</b><br><br><b>Prevalence by stage</b><br>Stage 1: 3.4%<br>Stage 2: 2.2%<br>Stage 3: 2.2%<br>None in stage 4 or 5                                                                                                               | Low    |
| Oluyombo R <sup>105</sup> | 2013 Nigeria West       | Multistage sampling                          | 454  | Age (years): 45.8 ± 19.0<br>Male gender: 43%<br>Hypertension: 20.4%                                                                                                                                                                                              | eGFR < 60 ml/min and/or macroalbuminuria (ACR > 300 mg/g or                                               | Proteinuria by urinary strip, negative cases were estimated for albumin creatinine ratio, eGFR by 186 |  | Macroalbuminuria in 8.9%                        | <b>Total prevalence: 18.8%</b><br><br><b>Prevalence by stage</b>                                                                                                                                                                                         | High   |



|                           |                    |                                                                                                   |       |                                                                                                                                         |                                                                                                  |                                                                     |  |                                       |                                                                                                                                                                                                  |        |
|---------------------------|--------------------|---------------------------------------------------------------------------------------------------|-------|-----------------------------------------------------------------------------------------------------------------------------------------|--------------------------------------------------------------------------------------------------|---------------------------------------------------------------------|--|---------------------------------------|--------------------------------------------------------------------------------------------------------------------------------------------------------------------------------------------------|--------|
|                           |                    | of Households of Ilie                                                                             |       | DM: 0.6%                                                                                                                                | dipstick proteinuria)                                                                            | MDRD                                                                |  |                                       | Stage 1: 2.4%<br>Stage 2: 4.1%<br>Stage 3: 11.8%<br>Stage 4: 0.5%                                                                                                                                |        |
| Eastwood J <sup>13</sup>  | 2010 Ghana, West   | Inhabitants of 12 villages                                                                        | 944   | Age (years): 54.7±11.2<br>Male gender: 38%<br>SBP: 125.5±26.0 mmHg<br>DBP: 74.4 13.6 mmHg<br>DM: 4%<br>BMI: 21.1 ±4.2 kg/m <sup>2</sup> | KDOQI                                                                                            | 175MDRD, CG, CKD-EPI                                                |  | Kinetic Jaffe and calibrated IDMS     | <b>Total Prevalence ( based on CKD-EPI and ethnicity correction) : 1.7%</b><br>MDRD: 1.6% (7.2 % without ethnicity correction;<br>CKD-EPI 1.7% (4.7% without ethnicity correction),<br>CG 21.0%. | High   |
| Gouda Z <sup>117</sup>    | 2011 Egypt North   | Community based in Al-Buhayrah governorate                                                        | 417   | Age (years): 39.12 ± 14.29<br>Male gender: 43.2%<br>Hypertension: 25.20%<br>DM: 10.6%<br>BMI: 29.96 ± 6.18 kg/m <sup>2</sup>            | eGFR <60 ml/min/1.73 m <sup>2</sup>                                                              | Quantitative assessment of urinary ACR, eGFR by 175 MDRD            |  | 10.6% microalbuminuria                | <b>Total prevalence 18% Prevalence by age:</b><br>18–29 years: 0.8%<br>30–44 years: 6.1%<br>45–60 years: 19.6%<br>>60 years: 40%<br><b>Prevalence by gender:</b><br>Females: 9.6%<br>Males: 12%  | Medium |
| Ayodele OE <sup>77</sup>  | 2011 Nigeria West  | People at a major trade center, the public servant secretariat and the state broadcasting station | 586   | Age (years): 42.4±11.2<br>Male gender: 61.4 %<br>Hypertension: 16.4%<br>DM: 3.8%<br>BMI: 25.9±5.4 kg/m <sup>2</sup>                     | proteinuria ≥+1                                                                                  | Proteinuria by urinary strip                                        |  | 2.50%                                 | <b>Total prevalence ( based on proteinuria ): 2.50%</b><br><b>Prevalence by gender:</b><br><b>Females: 1.7%</b><br><b>Males :3%</b>                                                              | Medium |
| Abu-Aisha H <sup>78</sup> | 2009 Sudan East    | Pilot survey of police housing complex                                                            | 273   | Age (years): 34.3±12<br>Male gender: 49.1%<br>Hypertension: 27%<br>DM: 5.1%                                                             | eGFR <60 ml/min/1.73 m <sup>2</sup> and or proteinuria                                           | Proteinuria by urinary strip, 175MDRD, CG                           |  | 5.30%                                 | <b>Total prevalence (MDRD) 7.7%</b><br>[11% by CG]<br><b>Prevalence by stage</b><br>Stage 1 or 2: 4.7%<br>Stage 3: 2.6%<br>Stage 4: 0<br>Stage: 0.4%                                             | Medium |
| Gharbi M <sup>106</sup>   | 2012 Morocco North | Stratified random sampling                                                                        | 10524 | Age (years): range, 25-70<br>Male gender: (50%),<br>Hypertension : 16.7%                                                                | eGFR < 60 ml/ min/1.73 m <sup>2</sup> or macroalbuminuria or dipstick abnormalities (proteinuria | 175 MDRD, microalbuminuria and proteinuria by urinary strip and ACR |  | microalbuminuria (30-299 mg/l): 5.26% | <b>Total prevalence 2.90%</b>                                                                                                                                                                    | High   |

|                              |                            |                                                                      |      |                                                                                                                                                                                     |                                                                                             |                                                               |                        |                       |                                                                                                                                                                                                           |        |
|------------------------------|----------------------------|----------------------------------------------------------------------|------|-------------------------------------------------------------------------------------------------------------------------------------------------------------------------------------|---------------------------------------------------------------------------------------------|---------------------------------------------------------------|------------------------|-----------------------|-----------------------------------------------------------------------------------------------------------------------------------------------------------------------------------------------------------|--------|
|                              |                            | of population in two towns                                           |      |                                                                                                                                                                                     | $\geq ++$ 1 or haematuria: $\geq ++$ 1) or diabetes type 1 associated with microalbuminuria |                                                               |                        |                       |                                                                                                                                                                                                           |        |
| CU O <sup>153</sup>          | 2014 Nigeria West          | All attendees to lectures of the Ebreime Foundation for the elderly, | 170  | Age (years): 68.1 $\pm$ 7.7<br>Male gender: 67.1%                                                                                                                                   | eGFR<60ml/min/1.73 m <sup>2</sup>                                                           | 175 MDRD                                                      | IDMS calibrated        |                       | <b>Total prevalence: 43.50%</b> ,<br>(all cases were at stage 3)<br><b>Prevalence by age:</b><br>$\leq$ 65 years: 49.1%<br>>65 years: 40.7%<br><b>Prevalence by gender:</b><br>Females: 64%<br>Males: 33% | Low    |
| Booyesen H <sup>155</sup>    | 2016 South Africa South    | participants from families of black African descent                  | 1221 | Age (years):44.1 $\pm$ 18.4<br>Male gender:34.9%<br>BMI (kg/m <sup>2</sup> ):29.5 $\pm$ 8.0<br>Hypertension: 45%<br>Diabetes mellitus:25.2%                                         | eGFR<60ml/min/1.73 m <sup>2</sup>                                                           | eGFR by CG, 4 variables MDRD, CKD-EPI                         | IDMS calibrated        | Not measured          | <b>Total prevalence:6.3%</b>                                                                                                                                                                              | High   |
| Kalyesubul a R <sup>90</sup> | 2017 Uganda East           | Community based survey among all households of Wakiso district       | 955  | Age (years):31 (IQR: 24–42)<br>Male gender: 33%<br>BMI(kg/m <sup>2</sup> ) categories:<br>Underweight:5.5%<br>Normal: 56.9%<br>Overweight:24.2%<br>obese : 13.4%<br>Diabetics: 5.9% | KDOQI                                                                                       | Proteinuria by dipstick and eGFR by CG, MDRD, and CKD-EPI     |                        | 0.3%                  | <b>Total prevalence: 15.2%</b><br><b>Prevalence by stage:</b><br>Stage 1: 6.2%<br>Stage 2:12.7%<br>Stage 3:2.4%<br>Stage 4:0<br>Stage 5: 0.1%                                                             | High   |
| Kaze F <sup>91</sup>         | 2015 Cameroon Central-West | Population of the Littoral region                                    | 500  | Age (years): 45.3 $\pm$ 13.2<br>Male gender: 53.4%<br>BMI (kg/m <sup>2</sup> ): 27.1 $\pm$ 5.3<br>Diabetes mellitus: 2.8%<br>Hypertension: 12.2%                                    | any albuminuria and/or eGFR <60 ml/min/1.73m <sup>2</sup>                                   | Albuminuria by dipstick and eGFR by CG, MDRD, CKD-EPI         | Kinetic Jaffe and IDMS | 7.2%                  | <b>Total prevalence (CKD-EPI): 10%</b><br>[14.2% by CG, 11%MDRD]<br><b>Prevalence by gender:</b><br>Females: 9.8%<br>Males: 10.1%                                                                         | High   |
| Kaze F <sup>112</sup>        | 2015 Cameroon Central-West | Population of the Western Region                                     | 439  | Age (years):47 $\pm$ 16.1<br>Male gender: 42.1%<br>Hypertension: 10.7%<br>Diabetes mellitus: 5.9%                                                                                   | Albuminuria and/or eGFR <60 ml/min confirmed 3 months later                                 | Albuminuria by dipstick and ACR and eGFR by CG, MDRD, CKD-EPI | Kinetic Jaffe and IDMS | 12.1% albuminuria had | <b>Total prevalence (CKD-EPI): 27.6%</b><br>[38.5% by CG, 27.3%MDRD]<br><b>Prevalence by gender:</b><br>Females: 15.4%<br>Males: 10.2%                                                                    | High   |
| Laurence E <sup>130</sup>    | 2016 South Africa South    | Teachers from public schools                                         | 489  | Age (years): 46.3 $\pm$ 8.5<br>Male gender: 30%<br>BMI(kg/m <sup>2</sup> ):males: 29.1 $\pm$ 4.8, females: 32.4.1 $\pm$ 7.                                                          | Proteinuria $\geq$ 0.30 mg/mg or eGFR <60 ml/min/1.73 m <sup>2</sup>                        | Proteinuria by PCR and eGFR using MDRD                        | Kinetic Jaffe          | Not mentioned         | <b>Total prevalence: 10.4%</b><br><b>Prevalence by gender:</b><br>Females: 10.9%<br>Males:9%                                                                                                              | Medium |

|                           |                               |                                                                                     |      |                                                                                                                                                                                                                      |                                                                                                                                            |                                                                     |  |               |                                                                                                                                                                                                                        |        |
|---------------------------|-------------------------------|-------------------------------------------------------------------------------------|------|----------------------------------------------------------------------------------------------------------------------------------------------------------------------------------------------------------------------|--------------------------------------------------------------------------------------------------------------------------------------------|---------------------------------------------------------------------|--|---------------|------------------------------------------------------------------------------------------------------------------------------------------------------------------------------------------------------------------------|--------|
|                           |                               | in in the urban area of the Metro South Education District                          |      | Hypertension: 48.5%<br>Diabetes mellitus: 10.1%                                                                                                                                                                      |                                                                                                                                            |                                                                     |  |               |                                                                                                                                                                                                                        |        |
| Lunyera J <sup>92</sup>   | 2016<br>Uganda<br>East        | Urban residents of Kampala                                                          | 141  | Age (years): 64% in age group of 18-39<br>Male gender: 43%<br>BMI( kg/m <sup>2</sup> ): 25.9 (IQR 22.7-30.7)<br>Hypertension: 38%<br>Impaired fasting blood glucose: 13%                                             | Proteinuria as urine protein of $\geq 1+$ on dipstick in the absence of hematuria and leukocyturia                                         | Proteinuria by dipstick                                             |  | 13%           | <b>Total prevalence(based on proteinuria): 13%</b><br><b>Prevalence by age:</b><br>18-39 years : 16%<br>40-59 years : 4%<br>$\geq 60$ years: 0<br><b>Prevalence by gender:</b><br>Females: 11%<br>Males: 15%           | Low    |
| Mogueo A <sup>131</sup>   | 2015<br>South Africa<br>South | Household residents of Bellville                                                    | 902  | Age (years): 55 $\pm$ 15<br>Male gender: 23%<br>BMI( kg/m <sup>2</sup> ): 29.9 $\pm$ 7.2<br>Hypertension: 49.8%<br>Diabetes mellitus: 27.9%                                                                          | eGFR <60 ml/min/1.73 m <sup>2</sup> or any nephropathy                                                                                     | Albuminuria by ACR and eGFR by MDRD and CKD-EPI                     |  | 2.3%          | <b>Total prevalence( CKD-EPI): 21.7%</b><br>[ prevalence by MDRD: 29.7%]<br><b>Prevalence by gender:</b><br>Females:23.3%<br>Males: 16.6%                                                                              | Medium |
| Peck R <sup>148</sup>     | 2016,<br>Tanzania,<br>East    | Stratified multistage sampling of adult population in Mwanza city, Geita and Kahama | 1043 | Age (years):35.5 $\pm$ 15.3<br>Male gender: 45.7%<br>BMI( kg/m <sup>2</sup> ) categories:<br>Underweight: 10.5%<br>Normal: 71%<br>Overweight: 11.8%<br>Obese :6.6%<br>Diabetes mellitus: 0.9%<br>Hypertension: 17.3% | eGFR<60 ml/min/1.73 m <sup>2</sup>                                                                                                         | eGFR by MDRD and CKD-EPI                                            |  | Not measured  | <b>Total prevalence )CKD-EPI): 7%</b><br><b>Prevalence by age:</b><br><25 years: 3.4%<br>25-34 years: 4.9%<br>35-44 years: 7.2%<br>$\geq 45$ years: 12.1%<br><b>Prevalence by gender</b><br>Females: 6%<br>Males: 7.3% | High   |
| Stanifer J <sup>132</sup> | 2016,<br>Tanzania,<br>East    | stratified, cluster-designed cross-sectional household                              | 481  | Age (years): 46.9 $\pm$ 15.1<br>Male gender: 74.4%<br>Diabetes mellitus: 9.4%<br>Hypertension: 31%                                                                                                                   | presence of albuminuria ( $\geq 30$ mg/dl; confirmed by repeat assessment) and/or a reduction in eGFR $\leq 60$ ml/min/1.73 m <sup>2</sup> | Quantitative assessment of albuminuria and eGFR by MDRD and CKD-EPI |  | 6.8%          | <b>Total prevalence : 11.9%</b>                                                                                                                                                                                        | High   |
| Stanifer J <sup>133</sup> | 2015,<br>Tanzania,<br>East    | Randomly selected adults                                                            | 481  | Age (years): 45 (IQR 35-59)<br>Male gender: 25.6%<br>Diabetes mellitus: 12.7%<br>Hypertension: 28%                                                                                                                   | eGFR<60 ml/min/1.73m <sup>2</sup> and/or persistent albuminuria                                                                            | Quantitative assessment of albuminuria and eGFR by MDRD             |  | Not mentioned | <b>Total prevalence: 7%</b><br><b>Prevalence by age:</b><br>18-39 years: 7.6%<br>40-59 years:5.4%<br>60+ years: 7.7%<br><b>Prevalence by gender</b>                                                                    | High   |

|                           |                      |                                                     |     |                                                                                                  |                                                                                                                                 |                                                         |               |               |                                                                                                                                                                                         |      |
|---------------------------|----------------------|-----------------------------------------------------|-----|--------------------------------------------------------------------------------------------------|---------------------------------------------------------------------------------------------------------------------------------|---------------------------------------------------------|---------------|---------------|-----------------------------------------------------------------------------------------------------------------------------------------------------------------------------------------|------|
|                           |                      |                                                     |     |                                                                                                  |                                                                                                                                 |                                                         |               |               | Females: 6.2%<br>Males: 7.9%                                                                                                                                                            |      |
| Stanifer J <sup>134</sup> | 2016, Tanzania, East | stratified, cluster-designed cross-sectional survey | 606 | Age (years): 45.5 ±15.5<br>Male gender: 24.6%<br>Diabetes mellitus: 10.1%<br>Hypertension: 23.7% | the presence of albuminuria (≥30mg/dl confirmed by repeat assessment) and/or a once-measured eGFR ≤60 ml/min/1.73m <sup>2</sup> | Quantitative assessment of albuminuria and eGFR by MDRD | IDMS          | Not mentioned | <b>Total prevalence: 8%</b><br><b>Prevalence by age:</b><br>18–39 years: 6.4%<br>40–59 years: 9.3%<br>60+ years: 10.5 %<br><b>Prevalence by gender</b><br>Females: 7.2%<br>Males: 11.4% | High |
| Wachukwu C <sup>93</sup>  | 2015, Nigeria, West  | Adult volunteers in a university                    | 259 | Age (years): 28.3±9.7<br>Male gender: 52.1%<br>SBP(mmHg): 117.3±15.5<br>DBP(mmHg): 75.7±11.7     | eGFR <60 ml/min/1.73m <sup>2</sup>                                                                                              | Proteinuria by dipstick and eGFR by CG                  | Not mentioned | 12.4%         | <b>Total prevalence: 1.9%</b>                                                                                                                                                           | Low  |

DM: diabetes mellitus, BMI: body mass index, SBP: systolic blood pressure, DBP: diastolic blood pressure, IDMS: Isotope dilution mass spectrometry, MDRD: Modification of Diet in Renal Disease, CG: Cockcroft Gault,

CKD-EPI: Chronic Kidney Disease Epidemiology Collaboration, IQR: inter-quartile range, KDOQI: Kidney Disease Outcome Quality Initiative

Table 3: Studies on CKD among HIV patients

1  
2  
3  
4  
5  
6  
7  
8  
9  
10  
11  
12  
13  
14  
15  
16  
17  
18  
19  
20  
21  
22  
23  
24  
25  
26  
27  
28  
29  
30  
31  
32  
33  
34  
35  
36  
37  
38  
39  
40  
41  
42  
43  
44  
45  
46  
47  
48  
49

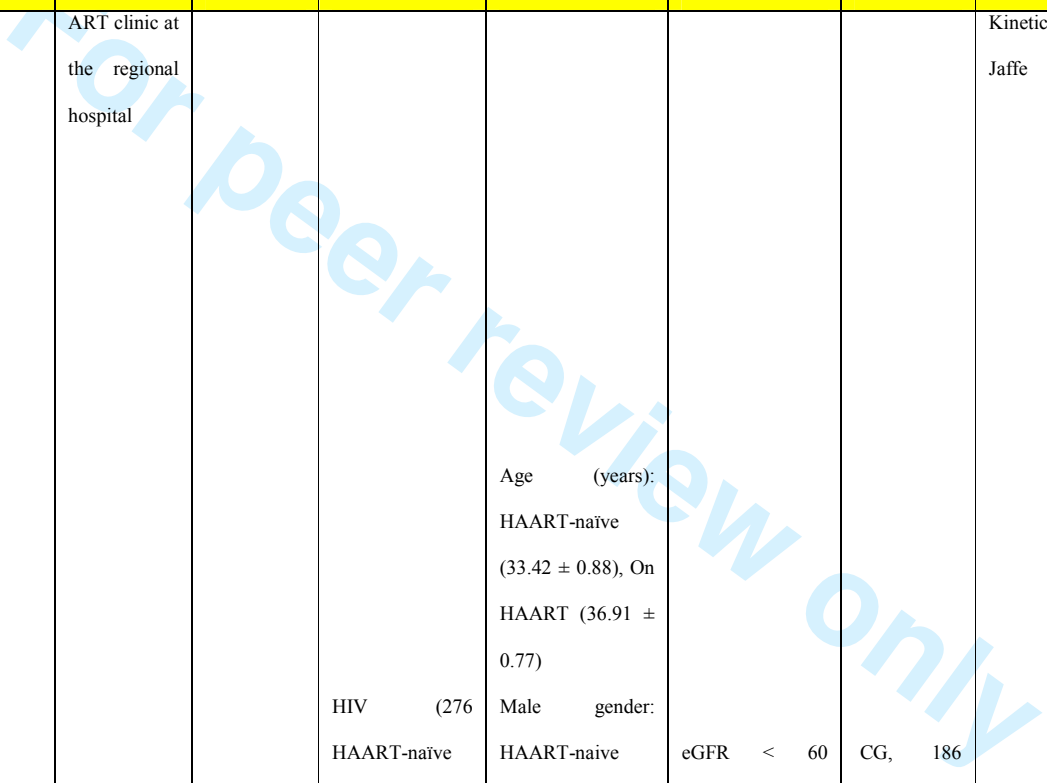

| Author                | Year, Country, Region | Location                            | N    | Study group                      | Population characteristics                                                                                                   | Definition of CKD                                  | Method of outcome assessment | Creatinine assay | Proteinuria  | CKD prevalence                                                                                                                                                                                                                                                                                 | Quality assessment |
|-----------------------|-----------------------|-------------------------------------|------|----------------------------------|------------------------------------------------------------------------------------------------------------------------------|----------------------------------------------------|------------------------------|------------------|--------------|------------------------------------------------------------------------------------------------------------------------------------------------------------------------------------------------------------------------------------------------------------------------------------------------|--------------------|
| Wkba O <sup>142</sup> | 2013, Ghana, West     | ART clinic at the regional hospital | 442  | HIV (276 patients 166 on HAART)  | Age (years):<br>HAART-naïve (33.42 ± 0.88), On HAART (36.91 ± 0.77)<br>Male gender:<br>HAART-naïve (28.3%), On HAART (22.3%) | eGFR < 60 mL/min/1.73 m <sup>2</sup> for > 3months | CG, 186 MDRD, CKD-EPI        | Kinetic Jaffe    | Not measured | <b>Total prevalence (CKD-EPI): 10.2%</b><br>HAART naïve: 8.7% CG, 9.1% MDRD, <b>8.7% CKD-EPI</b><br>On HAART: 14.5% CG, 12.6% MDRD, <b>12.6% CKD-EPI</b><br><b>Prevalence by gender:</b><br><b>Females: HAART-Naïve (7.5%), HAART (14%)</b><br><b>Males: HAART-Naïve (11.5%), HAART (8.1%)</b> | Low                |
| töhr W <sup>143</sup> | 2011, Uganda,         | Three centers in                    | 3316 | HIV-infected patients initiating | Age (years): 36.8 (32-42.2)                                                                                                  | eGFR<60 ml/min/1.73 m <sup>2</sup>                 | CG                           | Kinetic Jaffe    | Not measured | <b>Total prevalence : 7.2%</b>                                                                                                                                                                                                                                                                 | Medium             |

1  
2  
3  
4  
5  
6  
7  
8  
9  
10  
11  
12  
13  
14  
15  
16  
17  
18  
19  
20  
21  
22  
23  
24  
25  
26  
27  
28  
29  
30  
31  
32  
33  
34  
35  
36  
37  
38  
39  
40  
41  
42  
43  
44  
45  
46  
47  
48  
49

|  |                                        |                                      |      |                              |                                                                                                                                                                                                                                                                                |                                                                                                                                                            |                        |               |              |                                               |        |
|--|----------------------------------------|--------------------------------------|------|------------------------------|--------------------------------------------------------------------------------------------------------------------------------------------------------------------------------------------------------------------------------------------------------------------------------|------------------------------------------------------------------------------------------------------------------------------------------------------------|------------------------|---------------|--------------|-----------------------------------------------|--------|
|  | Zimbabwe, East and South               | Uganda and Zimbabwe                  |      | ART                          | Male gender: 35%<br>SBP: median:110 (IQR:100-120) mmHg<br>DBP: median:70 (60-80) mmHg<br>BMI: 21.1 (19.1–23.6) kg/m <sup>2</sup>                                                                                                                                               | on ≥ 2 consecutive visits 80 days apart or confirmed 25% decrease if eGFR <60 ml/min/1.73 m <sup>2</sup> at baseline                                       |                        |               |              |                                               |        |
|  | 2008, Uganda, Zimbabwe, East and South | Three centres in Uganda and Zimbabwe | 3316 | HIV-infected patients on ART | Age (years): 36.8 (32-42.2)<br>Male gender: 35%<br>SBP: median:110 (IQR:100-120) mmHg<br>DBP: median:70 (60-80) mmHg<br>BMI categories:<br><18.5 kg/m <sup>2</sup> : 18%<br>18.5- <25 kg/m <sup>2</sup> : 66%<br>25-<30 kg/m <sup>2</sup> : 12%<br>≥ 30 kg/m <sup>2</sup> : 4% | eGFR<60 ml/min 1.73 m <sup>2</sup> on ≥2 consecutive occasions >80 days apart or confirmed 25% decrease if eGFR <60 ml/min/1.73 m <sup>2</sup> at baseline | 186 MDRD, CG           | Kinetic Jaffe | Not measured | <b>Total prevalence (MDRD):3.1% , CG 7.4%</b> | Medium |
|  | 2011, Burundi,                         | Outpatients HIV clinic               | 300  | HIV-infected patients        | Age (years): 40.1 (33-46.5) Male                                                                                                                                                                                                                                               | KDOQI                                                                                                                                                      | Proteinuria by urinary | Not mentioned | 6.10%        | <b>Total prevalence (MDRD): 45.7%</b>         | Medium |

1  
2  
3  
4  
5  
6  
7  
8  
9  
10  
11  
12  
13  
14  
15  
16  
17  
18  
19  
20  
21  
22  
23  
24  
25  
26  
27  
28  
29  
30  
31  
32  
33  
34  
35  
36  
37  
38  
39  
40  
41  
42  
43  
44  
45  
46  
47  
48  
49

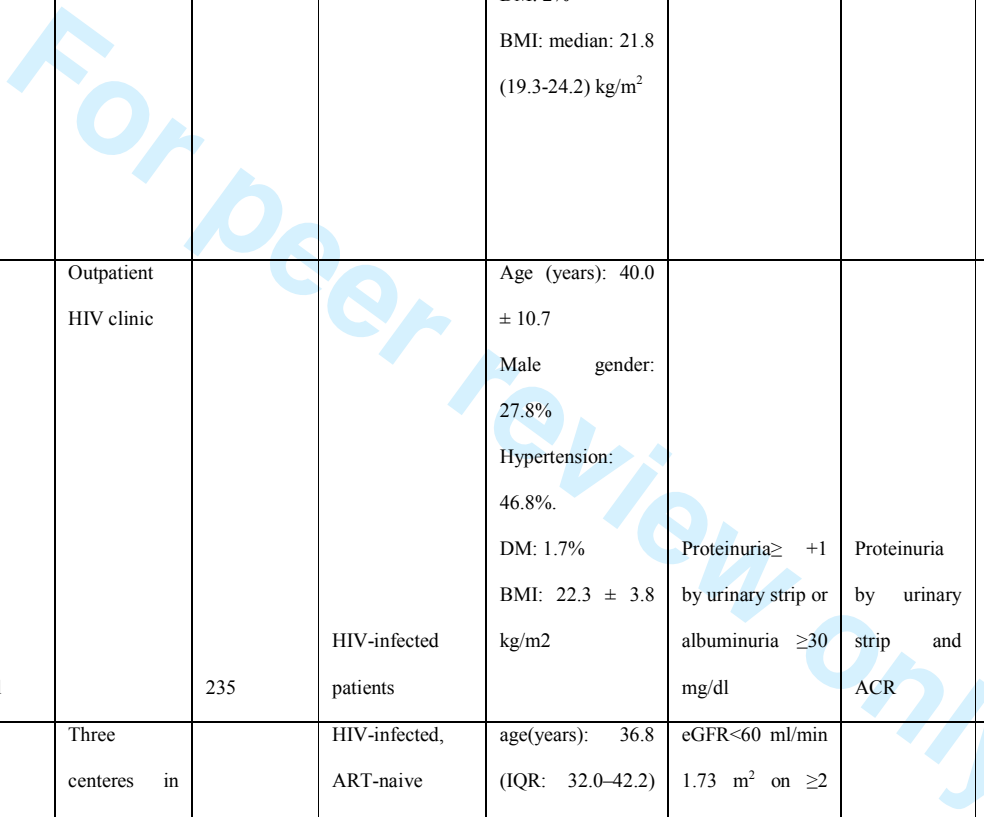

|                            |                                                    |                                               |      |                                                                                                  |                                                                                                                                     |                                                                                                               |                                               |                                                              |                                                                                                                                                 |        |
|----------------------------|----------------------------------------------------|-----------------------------------------------|------|--------------------------------------------------------------------------------------------------|-------------------------------------------------------------------------------------------------------------------------------------|---------------------------------------------------------------------------------------------------------------|-----------------------------------------------|--------------------------------------------------------------|-------------------------------------------------------------------------------------------------------------------------------------------------|--------|
|                            | East                                               |                                               |      |                                                                                                  | gender:29.7%<br>Hypertension:<br>2.7%<br>DM: 2%<br>BMI: median: 21.8<br>(19.3-24.2) kg/m <sup>2</sup>                               |                                                                                                               | strip, CG,<br>186MDRD                         |                                                              | GG: 46.5%<br><b>Prevalence by<br/>Stages ( using<br/>MDRD)</b><br>Stage 1: 30.2%<br>Stage 2:13.5%<br>Stage 3: 2%<br>Stage 4 & 5: no<br>patients |        |
| Masimango M <sup>107</sup> | 2014,<br>Congo,<br>Central                         | Outpatient<br>HIV clinic                      | 235  | HIV-infected<br>patients                                                                         | Age (years): 40.0<br>± 10.7<br>Male gender:<br>27.8%<br>Hypertension:<br>46.8%.<br>DM: 1.7%<br>BMI: 22.3 ± 3.8<br>kg/m <sup>2</sup> | Proteinuria≥ +1<br>by urinary strip or<br>albuminuria ≥30<br>mg/dl                                            | Proteinuria<br>by urinary<br>strip and<br>ACR | Not<br>measured<br><br><br><br><br>Proteinuria<br>≥+1: 41.3% | <b>Total prevalence<br/>( based on<br/>proteinuria): 41.3<br/>%</b>                                                                             | Low    |
| Reid A <sup>145</sup>      | 2008,<br>Uganda,<br>Zimbabwe,<br>East and<br>South | Three<br>centers in<br>Uganda and<br>Zimbabwe | 3316 | HIV-infected,<br>ART-naive<br>adults with<br>CD4+ cell<br>counts of<200<br>cells/mm <sup>3</sup> | age(years): 36.8<br>(IQR: 32.0–42.2)<br>male gender: 35%<br>SBP: median:110<br>(IQR: 100-120)<br>mmHg                               | eGFR<60 ml/min<br>1.73 m <sup>2</sup> on ≥2<br>consecutive<br>occasions >80<br>days apart or<br>confirmed 25% | CG                                            | Kinetic<br>Jaffe<br><br><br><br><br>Not<br>measured          | <b>Total prevalence :<br/>7%</b>                                                                                                                | Medium |

1  
2  
3  
4  
5  
6  
7  
8  
9  
10  
11  
12  
13  
14  
15  
16  
17  
18  
19  
20  
21  
22  
23  
24  
25  
26  
27  
28  
29  
30  
31  
32  
33  
34  
35  
36  
37  
38  
39  
40  
41  
42  
43  
44  
45  
46  
47  
48  
49

|                        |                           |                                                                                         |      |                                                                          |                                                                                                               |                                                                   |                                      |                 |                       |                                                                  |        |
|------------------------|---------------------------|-----------------------------------------------------------------------------------------|------|--------------------------------------------------------------------------|---------------------------------------------------------------------------------------------------------------|-------------------------------------------------------------------|--------------------------------------|-----------------|-----------------------|------------------------------------------------------------------|--------|
|                        |                           |                                                                                         |      |                                                                          | DBP: median:70<br>(IQR: 60-80)<br>mmHg<br>BMI: median, 21.1<br>(IQR:19.1-23.6)<br>kg/m <sup>2</sup>           | decrease if eGFR<br><60 ml/min/1.73<br>m <sup>2</sup> at baseline |                                      |                 |                       |                                                                  |        |
| Abian J <sup>108</sup> | 2009, South Africa, South | HIV outpatient clinic at Johannesburg Hospital                                          | 578  | HIV-infected naïve ART patients                                          | Age (years): 37 (range 16-70 years)<br>Male gender: 38%<br>DM: 4.6% among group with microalbuminuria         | Proteinuria ≥ +1 by urinary strip or albuminuria ≥30 mg/dl        | Proteinuria by urinary strip and PCR | Not measured    | 43.7% had proteinuria | <b>Total prevalence (based on proteinuria prevalence): 43.7%</b> | Low    |
| Lucas G <sup>154</sup> | 2010, Uganda, East        | All consenting individuals residing in every household in 50 Rakai District communities | 1960 | 1202 HIV-infected patients and 664 HIV -ve age- and sex-matched controls | Age (years): HIV-ve, 28 (IQR: 24-35), HIV+ve: 30 (IQR: 25-36)<br>Male gender: HIV-ve: (38.7%), HIV+ve (36.4%) | eGFR< 60ml/min/1.73 m <sup>2</sup>                                | MDRD                                 | IDMS-calibrated | Not measured          | <b>Total prevalence among HIV+ve : 0.7%</b>                      | Medium |
| ao J <sup>160</sup>    | 2011, sub-Saharan,        | Primary health care units                                                               | 2495 | HIV-infected patients before ART                                         | Age (years): 30 (IQR: 27-35)<br>Male gender: 30%                                                              | CrCl <50 ml/min                                                   | CG,186 MDRD, CKD-EPI                 | Not mentioned   | Not measured          | <b>Total prevalence (CKD-EPI with coefficient for</b>            | Medium |



1  
2  
3  
4  
5  
6  
7  
8  
9  
10  
11  
12  
13  
14  
15  
16  
17  
18  
19  
20  
21  
22  
23  
24  
25  
26  
27  
28  
29  
30  
31  
32  
33  
34  
35  
36  
37  
38  
39  
40  
41  
42  
43  
44  
45  
46  
47  
48  
49

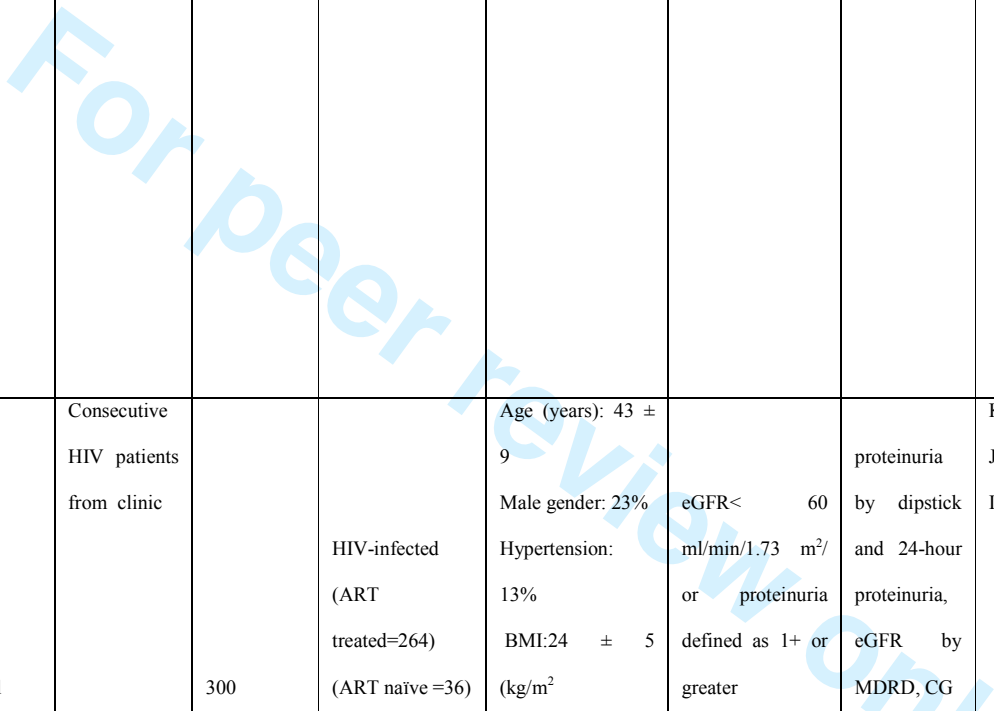

|  |                      |                                      |      |                                                |                                                                                                 |                                                                                   |                                                                   |                        |        |                                                                                                                                                                                                                                          |     |
|--|----------------------|--------------------------------------|------|------------------------------------------------|-------------------------------------------------------------------------------------------------|-----------------------------------------------------------------------------------|-------------------------------------------------------------------|------------------------|--------|------------------------------------------------------------------------------------------------------------------------------------------------------------------------------------------------------------------------------------------|-----|
|  |                      |                                      |      |                                                | BMI:22.8 (IQR: 20.4–25.6) kg/m <sup>2</sup>                                                     |                                                                                   |                                                                   |                        |        | <b>black race): 2.5%</b><br>CG: 3.4%<br>(MDRD with coefficient for black race): 2.5%<br><b>Prevalence by age:</b><br><30 years: 29.8%<br>30-39 years:57.1%<br>≥ 40 years: 13.1%<br><b>Prevalence by gender:</b><br><b>Females: 66.7%</b> |     |
|  | 2012, Congo, Central | Consecutive HIV patients from clinic | 300  | HIV-infected (ART treated=264) (ART naïve =36) | Age (years): 43 ± 9<br>Male gender: 23%<br>Hypertension: 13%<br>BMI:24 ± 5 (kg/m <sup>2</sup> ) | eGFR< 60 ml/min/1.73 m <sup>2</sup> / or proteinuria defined as 1+ or greater     | proteinuria by dipstick and 24-hour proteinuria, eGFR by MDRD, CG | Kinetic Jaffe and IDMS | 20.50% | <b>Total prevalence : 20.5%</b><br><b>3% of the patients had eGFR&lt; 60 ml/min/1.73 m<sup>2</sup> by MDRD</b>                                                                                                                           | Low |
|  | 2013, Ghana, West    | HIV clinic                           | 3137 | HIV-infected patients starting ART             | Age (years): 38 (32-45)<br>Male gender: 33%<br>BMI: 20.3 (IQR: 17.6-22.7) kg/m <sup>2</sup>     | eGFR <60 ml/min/1.73 m <sup>2</sup> ; or proteinuria ≥+ 1 (confirmed by uPCR > 45 | Proteinuria by urinary strip, ACR, PCR, eGFR by CG, MDRD,         | Not mentioned          |        | <b>Total prevalence (CKD-EPI):13.8%</b>                                                                                                                                                                                                  | Low |

1  
2  
3  
4  
5  
6  
7  
8  
9  
10  
11  
12  
13  
14  
15  
16  
17  
18  
19  
20  
21  
22  
23  
24  
25  
26  
27  
28  
29  
30  
31  
32  
33  
34  
35  
36  
37  
38  
39  
40  
41  
42  
43  
44  
45  
46  
47  
48  
49

|                                  |                              |                                                                               |      |                                    |                                                                                              |                                    |                                                             |               |                        |                                                                                                     |        |
|----------------------------------|------------------------------|-------------------------------------------------------------------------------|------|------------------------------------|----------------------------------------------------------------------------------------------|------------------------------------|-------------------------------------------------------------|---------------|------------------------|-----------------------------------------------------------------------------------------------------|--------|
|                                  |                              |                                                                               |      |                                    |                                                                                              | mg/mmol)                           | CKD-EPI                                                     |               |                        |                                                                                                     |        |
| Gupta S <sup>161</sup>           | 2011, Cameroon, Central-West | Electronic medical records of patients from 18 sites throughout Western Kenya | 7383 | HIV patients without ART           | Age (years): 35.5 (29.3-44.0)<br>Male gender: 26.9%                                          | eGFR<60 ml/min/1.73 m <sup>2</sup> | CG, MDRD                                                    | Not mentioned |                        | <b>Total prevalence (MDRD): 9.4%</b><br>CG: 20.2%<br><b>Prevalence by gender;</b><br>Females: 79.1% | Medium |
| kat MH <sup>146</sup>            | 2013, Congo, Central         | Ambulatory Treatment Center                                                   | 562  | Newly diagnosed HIV patients       | Age (years): 38.84 (IQR: 33.18-46.23)<br>Male gender: 33.9%<br>BMI: 20.31 (IQR: 17.97-22.89) | eGFR< 60 ml/min/1.73m <sup>2</sup> | 186MDRD                                                     | Kinetic Jaffe | Not measured           | <b>Total prevalence :8.5%</b>                                                                       | Low    |
| Wools-Kaloustian K <sup>80</sup> | 2007, Kenya, East            | Academic Model for the Prevention and Treatment of HIV/AIDS (AMPATH) clinic   | 373  | HIV-infected patients naive to ART | Age (years): 35.0 (range, 19–60)<br>Male gender: 32.1%<br>SBP: 104.7 (range, 80–140) mm/Hg   | CrCl<60 ml/min/1.73 m <sup>2</sup> | proteinuria by urinary strip, CG, full and abbreviated MDRD | Kinetic assay | 6.2% (proteinuria ≥1+) | <b>Total prevalence :11.50%</b>                                                                     | Low    |

1  
2  
3  
4  
5  
6  
7  
8  
9  
10  
11  
12  
13  
14  
15  
16  
17  
18  
19  
20  
21  
22  
23  
24  
25  
26  
27  
28  
29  
30  
31  
32  
33  
34  
35  
36  
37  
38  
39  
40  
41  
42  
43  
44  
45  
46  
47  
48  
49

|                       |                           |                                  |     |                                                |                                                                                                                                                                                                                                                 |                                                                                                               |                                                                                                |                                                           |                                                                                                                                                                                                               |                                                                                               |        |
|-----------------------|---------------------------|----------------------------------|-----|------------------------------------------------|-------------------------------------------------------------------------------------------------------------------------------------------------------------------------------------------------------------------------------------------------|---------------------------------------------------------------------------------------------------------------|------------------------------------------------------------------------------------------------|-----------------------------------------------------------|---------------------------------------------------------------------------------------------------------------------------------------------------------------------------------------------------------------|-----------------------------------------------------------------------------------------------|--------|
| Emem C <sup>81</sup>  | 2008,<br>Nigeria,<br>West | HIV/AIDS<br>outpatient<br>clinic | 400 | HIV-infected<br>patients                       | Age (years): 34.6<br>± 9.4<br>Male gender:<br>48.5%<br>Hypertension:<br>13.2%<br>BMI categories:<br><19.0 kg/m <sup>2</sup> : 59.2%<br>19-25 kg/m <sup>2</sup> : 37.5%<br>>25 kg/m <sup>2</sup> : 3.3%                                          | albuminuria +1<br>on at least two<br>occasions (4<br>weeks apart) and<br>or serum<br>creatinine >1.5<br>mg/dl | Proteinuria<br>or<br>albuminuria<br>by urinary<br>strip and 24<br>hours<br>proteinuria ,<br>CG | Not<br>mentioned                                          | 38%<br>proteinuria<br>with<br>dipstick<br>21.9%<br>nephrotic<br>range<br>proteinuria                                                                                                                          | <b>Total prevalence</b><br>: <b>38.8 %</b><br>Among patients;<br>8.8% had CrCl <15<br>ml/min. | Medium |
| Wyatt C <sup>82</sup> | 2011,<br>Rwanda,<br>East  | Community<br>based               | 891 | 677 HIV-<br>infected and 214<br>HIV-uninfected | Age (years): 34<br>(IQR: 30–39) HIV<br>+ve/43 (IQR:34–<br>50) HIV -ve<br>Male gender: 0<br>Hypertension:<br>HIV+ve: 4.8%/<br>HIV-ve: 8.3%<br>BMI (kg/m <sup>2</sup> ):<br>HIV+ve: 20.9<br>(IQR: 19.0–23.3)/<br>HIV-ve: 20.5<br>(IQR: 18.5–23.3) | eGFR<60<br>ml/min/1.73 m <sup>2</sup> /<br>or proteinuria +1<br>or greater                                    | Kinetic<br>Jaffe<br><br>proteinuria<br>by urinary<br>strip, eGFR<br>by MDRD,<br>CKD-EPI,<br>CG | (9% among<br>HIV +<br>and 7.2%<br>among non-<br>infected) | <b>Total prevalence</b><br><b>among HIV</b><br><b>+ve:9%</b><br>2.7% had eGFR<<br>60 ml/min/1.73 m <sup>2</sup><br>CKD prevalence<br>among HIV-ve:<br>7.2%<br>1.5% had eGFR<<br>60 ml/min/1.73 m <sup>2</sup> | Medium                                                                                        |        |

1  
2  
3  
4  
5  
6  
7  
8  
9  
10  
11  
12  
13  
14  
15  
16  
17  
18  
19  
20  
21  
22  
23  
24  
25  
26  
27  
28  
29  
30  
31  
32  
33  
34  
35  
36  
37  
38  
39  
40  
41  
42  
43  
44  
45  
46  
47  
48  
49

|                             |                                         |                                                     |     |                                                                    |                                                                                            |                                                                                                                                                                                                                                                                                                                      |                                                                |                  |       |                                                                                                                                                  |     |
|-----------------------------|-----------------------------------------|-----------------------------------------------------|-----|--------------------------------------------------------------------|--------------------------------------------------------------------------------------------|----------------------------------------------------------------------------------------------------------------------------------------------------------------------------------------------------------------------------------------------------------------------------------------------------------------------|----------------------------------------------------------------|------------------|-------|--------------------------------------------------------------------------------------------------------------------------------------------------|-----|
| BoleackKaze F <sup>83</sup> | 2013,<br>Cameroon,<br>Central –<br>West | HIV clinic of<br>Yaoundé<br>general<br>hospital     | 104 | All newly<br>diagnosed HIV-<br>infected patients<br>naïve to HAART | Age (years):<br>35±10.7<br>Male gender: 32%                                                | The presence of<br>proteinuria +1 or<br>more and eGFR<<br>60 ml/min based<br>on the average of<br>eGFR by 2<br>equations                                                                                                                                                                                             | Proteinuria<br>by urinary<br>strip, eGFR<br>by CG, 175<br>MDRD | Kinetic<br>Jaffe | 36%   | <b>Total prevalence</b><br>: <b>36%</b><br>Among patients;<br>3% had eGFR< 60<br>ml/min/1,73 m <sup>2</sup>                                      | Low |
| Struik G <sup>84</sup>      | 2011,<br>Malawi,<br>East                | ART clinic in<br>a central<br>hospital in<br>Malawi | 526 | Consecutive<br>newly referred<br>HIV-infected<br>patients on ART   | Age (years): 34.3<br>± 9.3;<br>Male gender:<br>43.5%<br>Hypertension:<br>11.2%<br>DM: 0.8% | any proteinuria<br>(≥+1);<br>heavy proteinuria<br>( ≥+2); any<br>proteinuria (≥+1)<br>with renal<br>dysfunction (e<br>GFR <60<br>ml/min/1.73 m <sup>2</sup> )<br>and heavy<br>proteinuria (≥+2)<br>with renal<br>dysfunction (CrCl<br>< 60 mL/minute)<br>and<br>the absence of<br>any alternative<br>cause for renal | Proteinuria<br>by urinary<br>strip, eGFR<br>by CG and<br>MDRD  | Not<br>mentioned | 23.3% | <b>Total prevalence:</b><br><b>23.3%</b><br><b>Among patients</b><br><b>with proteinuria;</b><br><b>5.3% had CrCl&lt;</b><br><b>60 ml/minute</b> | Low |

|                          |                           |                                                         |     |                                              |                                                                                                        |                                                                                               |                                                                  |               |                                     |                                                                                              |     |
|--------------------------|---------------------------|---------------------------------------------------------|-----|----------------------------------------------|--------------------------------------------------------------------------------------------------------|-----------------------------------------------------------------------------------------------|------------------------------------------------------------------|---------------|-------------------------------------|----------------------------------------------------------------------------------------------|-----|
|                          |                           |                                                         |     |                                              |                                                                                                        | dysfunction or proteinuria.                                                                   |                                                                  |               |                                     |                                                                                              |     |
| Attolou V <sup>118</sup> | 1998, Benin, West         | National Central hospital                               | 92  | HIV-infected patients                        | Age(years): 22±4<br>Male gender: 68 %                                                                  | Proteinuria > 0.5 g/24 hrs and SCr>14 mg/l                                                    | Serum creatinine measurement and 24-hour proteinuria             | Not mentioned | Proteinuria >0.5 g/24 hrs in 23.33% | <b>Total prevalence:27.16%</b>                                                               | Low |
| Agaba EI <sup>170</sup>  | 2003, Nigeria, West       | infections unit of the Jos University Teaching Hospital | 126 | Consecutive 79 AIDS patients and 57 controls |                                                                                                        | Not known                                                                                     | Not known                                                        | Not known     | 25% (AIDS group)                    | <b>Total prevalence among AIDS group:51.80%</b><br>CKD prevalence among control group: 12.2% | Low |
| Chana GT <sup>100</sup>  | 2011, Zimbabwe, South     | Outpatient clinics                                      | 159 | HIV-infected patients naive to ART           |                                                                                                        | CrCl < 60 ml/min.<br>Proteinuria ≥ +1 and/or PCR > 20 mg/mg                                   | Proteinuria by urinary strip and 24-hour proteinuria, eGFR by CG | Not mentioned | 45.90%                              | <b>Total prevalence : 45.9%</b><br>Among patients; 7.50% had CrCl< 60 ml/min                 | Low |
| Man TM <sup>101</sup>    | 2006, South Africa, South | Medical center                                          | 615 | HIV patients not on ART                      | Age (years): 31(range,13-63)<br>Male gender: 25%,<br>Proteinuria -ve: 117±14/70±9<br>Microalbuminuria: | Microalbuminuria > urinary protein 30 and 300 mg/24 h.<br>A cut-off serum creatinine level of | Proteinuria by urinary strip and 24-hour proteinuria, CG and     | Not mentioned | 6%                                  | <b>Total prevalence ( based on proteinuria ): 6%</b>                                         | Low |

1  
2  
3  
4  
5  
6  
7  
8  
9  
10  
11  
12  
13  
14  
15  
16  
17  
18  
19  
20  
21  
22  
23  
24  
25  
26  
27  
28  
29  
30  
31  
32  
33  
34  
35  
36  
37  
38  
39  
40  
41  
42  
43  
44  
45  
46  
47  
48  
49

|                         |                              |                           |      |                                                        |                                                                                     |                                                                         |                                                               |               |                                |                                                                     |        |
|-------------------------|------------------------------|---------------------------|------|--------------------------------------------------------|-------------------------------------------------------------------------------------|-------------------------------------------------------------------------|---------------------------------------------------------------|---------------|--------------------------------|---------------------------------------------------------------------|--------|
|                         |                              |                           |      |                                                        | 121±15/81±10<br>Macroalbuminuria:<br>120±12/74±11                                   | 250 mmol/l was used to exclude those patients with advanced nephropathy | MDRD                                                          |               |                                |                                                                     |        |
| Peters P <sup>147</sup> | 2008, Uganda, East           | Home-Based AIDS Care      | 508  | HIV patients starting HAART                            | Age (years): 39 (median)<br>Male gender: 41%                                        | CrCl of 25–50 ml/min                                                    | CG, 175 MDRD                                                  | Kinetic Jaffe | Not measured                   | <b>Total prevalence: 20%</b>                                        | Low    |
| ao J <sup>110</sup>     | 2011, Cameroon, Central-West | Clinics                   | 389  | 199 HIV +ve and 190 HIV -ve pregnant women             | Age (years): HIV+ve (27 (IQR: 24- 31)), HIV-ve (27 (IQR: 22 -31))<br>Male gender: 0 | Proteinuria (PCR > 200 mg/g)                                            | Proteinuria by urinary strip and PCR                          | Not measured  | HIV+ve: 39.2%<br>HIV-ve: 20.9% | <b>Total prevalence among HIV+ve (based on proteinuria ): 39.2%</b> | Medium |
| Msango L <sup>85</sup>  | 2011, Tanzania, East         | Outpatient clinics        | 355  | HIV-infected patients naive to ART                     | Age (years): 36.1 ±7.9<br>Male gender: 35%<br>BMI (kg/m <sup>2</sup> ): 21.3 ±3.8   | KDOQI                                                                   | Proteinuria and albuminuria by urinary strip eGFR by CG, MDRD | Not mentioned | 36% proteinuria<br>≥ +1        | <b>Total prevalence: 85.6%</b>                                      | Low    |
| Myer L <sup>162</sup>   | 2013, South Africa, South    | primary healthcare clinic | 1861 | Consecutive 238 pregnant women, 1014 non-pregnant, 609 | Age (years): pregnant, 28 (IQR: 25–32), men, 37 (IQR: 32–45),                       | CrCl< 60ml/min                                                          | Absolute Scr and CG                                           | Not mentioned | Not measured                   | <b>Total prevalence: 5.8%</b>                                       | Low    |

1  
2  
3  
4  
5  
6  
7  
8  
9  
10  
11  
12  
13  
14  
15  
16  
17  
18  
19  
20  
21  
22  
23  
24  
25  
26  
27  
28  
29  
30  
31  
32  
33  
34  
35  
36  
37  
38  
39  
40  
41  
42  
43  
44  
45  
46  
47  
48  
49

|                           |                     |                                             |       |                                                                                       |                                                                                                                                       |                                                       |                                                       |                        |               |                                                                                        |        |
|---------------------------|---------------------|---------------------------------------------|-------|---------------------------------------------------------------------------------------|---------------------------------------------------------------------------------------------------------------------------------------|-------------------------------------------------------|-------------------------------------------------------|------------------------|---------------|----------------------------------------------------------------------------------------|--------|
|                           |                     |                                             |       | men; HIV-infected patients eligible for ART                                           | women, 33 (IQR: 28–39)<br>Male gender: 33%                                                                                            |                                                       |                                                       |                        |               |                                                                                        |        |
| Mulenga L <sup>163</sup>  | 2008, Zambia, South | Clinic                                      | 25249 | HIV-infected, ART-naïve adults initiating treatment                                   | Age (years): normal CrCl, 33.7±7.9, decreased CrCl, 38.5±9.9<br>Male gender: 39.7%                                                    | CrCl< 60 ml/min                                       | Absolute Scr, eGFR by CG and MDRD                     | Not mentioned          | Not measured  | <b>Total prevalence (MDRD): 3.2%</b>                                                   | Medium |
| Adedeji T <sup>158</sup>  | 2015, Nigeria, West | The University of Ilorin Teaching hospital, | 183   | Newly diagnosed HIV-infected ART naïve patients                                       | Age (years): 37.9+10.5<br>Male gender: 42.6%<br>BMI (kg/m <sup>2</sup> ): 20.88+ 3.56                                                 | eGFR< 60 ml/min/1.73m <sup>2</sup>                    | Absolute Scr, eGFR by MDRD                            | Kinetic Jaffe and IDMS | Not measured  | <b>Total prevalence: 24%</b>                                                           | Low    |
| Anyabolu E <sup>135</sup> | 2016, Nigeria, West | Federal Medical Centre                      | 529   | 393 newly diagnosed drug-naïve HIV patients, 136 age and sex matched HIV-seronegative | Age (years); 38.84 ± 10.65<br>Male gender: 28%<br>BMI categories: <18.5.0 kg/m <sup>2</sup> : 7%<br>18.5-24.9 kg/m <sup>2</sup> : 35% | 24-hours urine protein ≥0.300 g and/or GFR <60 ml/min | Quantitative assessment of protienuria, Scr, and eGFR | Not mentioned          | Not mentioned | <b>Total prevalence among HIV +ve patients:22.9%</b><br>Prevalence among HIV -ve: 8.1% | Low    |

1  
2  
3  
4  
5  
6  
7  
8  
9  
10  
11  
12  
13  
14  
15  
16  
17  
18  
19  
20  
21  
22  
23  
24  
25  
26  
27  
28  
29  
30  
31  
32  
33  
34  
35  
36  
37  
38  
39  
40  
41  
42  
43  
44  
45  
46  
47  
48  
49

|                           |                     |                                                                          |     |                     |                                                                                                                                                                                                                                                                                                                                                                                             |                                                                 |                                                   |               |                     |                                         |                                                                                          |
|---------------------------|---------------------|--------------------------------------------------------------------------|-----|---------------------|---------------------------------------------------------------------------------------------------------------------------------------------------------------------------------------------------------------------------------------------------------------------------------------------------------------------------------------------------------------------------------------------|-----------------------------------------------------------------|---------------------------------------------------|---------------|---------------------|-----------------------------------------|------------------------------------------------------------------------------------------|
|                           |                     |                                                                          |     | controls            | 25-29.9 kg/m <sup>2</sup> :<br>32%<br>≥ 30 kg/m <sup>2</sup> :23%                                                                                                                                                                                                                                                                                                                           |                                                                 |                                                   |               |                     |                                         |                                                                                          |
|                           |                     | Medical Out-patient Department of University of Ilorin Teaching Hospital |     |                     | Age (years): 40.3 ± 10.3<br>Male gender: 44%<br>BMI (kg/m <sup>2</sup> ): 20.5 ± 4.8 among HIV patients , 26.7 ± 5.3 among control group<br>SBP(mmHg): 111.9 ± 1 among HIV patients, 126.1 ± 12.0 among control group<br>DBP(mmHg): 72.9 ± 9.5 among HIV patients, 80.6 ± 6.8 among control group<br>227 newly-diagnosed, ART naïve patients with HIV/AIDS, 108 age and sex matched control |                                                                 |                                                   | Kinetic Jaffe |                     |                                         | Low                                                                                      |
| Ayokunle D <sup>113</sup> | 2015, Nigeria, West |                                                                          | 335 |                     |                                                                                                                                                                                                                                                                                                                                                                                             | albuminuria ≥ 30 mg/g and/or eGFR < 60 ml/ml/1.73m <sup>2</sup> | Proteinuria by dipstick, and ACR and eGFR by MDRD |               | Not mentioned       |                                         | <b>Total prevalence among HIV patients: 47.6%</b><br>The prevalence among HIV –ve: 16.7% |
| Chadwick D <sup>114</sup> | 2015, Ghana,        | Komfo Anokye                                                             | 330 | HIV patients on ART | Age(years): 39 (IQR: 35–46)                                                                                                                                                                                                                                                                                                                                                                 | Proteinuria or CrCl<60ml/min                                    | Proteinuria ( dipsticks,                          | Not mentioned | 37% by dipstick and | <b>Total prevalence (proteinuria) :</b> | Low                                                                                      |



1  
2  
3  
4  
5  
6  
7  
8  
9  
10  
11  
12  
13  
14  
15  
16  
17  
18  
19  
20  
21  
22  
23  
24  
25  
26  
27  
28  
29  
30  
31  
32  
33  
34  
35  
36  
37  
38  
39  
40  
41  
42  
43  
44  
45  
46  
47  
48  
49

|                         |                          |                          |      |                                                        |                                                                                                                                                                                                        |                 |                                                                                     |                                                       |                                                                            |                                                                      |        |
|-------------------------|--------------------------|--------------------------|------|--------------------------------------------------------|--------------------------------------------------------------------------------------------------------------------------------------------------------------------------------------------------------|-----------------|-------------------------------------------------------------------------------------|-------------------------------------------------------|----------------------------------------------------------------------------|----------------------------------------------------------------------|--------|
|                         | West                     | Teaching Hospital        |      |                                                        | Male gender: 25%<br>BMI(kg/m <sup>2</sup> ): 22.9<br>(IQR: 20.5-26.6)                                                                                                                                  |                 | PCR, and<br>ACR) and<br>GFR by CG                                                   | 12% by<br>PCR                                         | 37%<br>CrCl<60 ml/min<br>among 7%                                          |                                                                      |        |
| EdwardsJ <sup>166</sup> | 2015,<br>Kenya,<br>East  | Two primary care clinics | 2206 | 210 HIV+ve patients and 1996 HIV -ve                   | Age (years): HIV +ve: 43 (IQR: 39-50), HIV-ve: 49 (IQR:40-56)<br>Male gender: HIV +ve: 31%, HIV-ve:28.7%<br>Hypertension: HIV+ve:44%, HIV-ve: 33.2%<br>Diabetes mellitus: HIV +ve: 5% , HIV -ve: 15.2% |                 | eGFR by<br>CKD-EPI                                                                  | Not measured                                          | <b>Total prevalence: 12.1%</b><br><b>HIV+ve: 17%</b><br><b>Hiv-ve: 11%</b> | Medium                                                               |        |
| Glaser N <sup>14</sup>  | 2016,<br>Malawi,<br>East | Lighthouse Clinic        | 363  | 116 HIV +ve ART-naïve patients and 247 HIV-ve patients | Age (years): 31 (IQR:26-39)<br>Male gender: 52%                                                                                                                                                        | eGFR< 60 ml/min | eGFR by<br>CG, MDRD,<br>and CKD-<br>EPI with and<br>without<br>correction<br>factor | IDMS<br>calibrated<br>creatinine<br>and<br>cystatin-C | Not measured                                                               | <b>Total prevalence among HIV+ve (creatinine based CKD-EPI):1.9%</b> | Medium |

1  
2  
3  
4  
5  
6  
7  
8  
9  
10  
11  
12  
13  
14  
15  
16  
17  
18  
19  
20  
21  
22  
23  
24  
25  
26  
27  
28  
29  
30  
31  
32  
33  
34  
35  
36  
37  
38  
39  
40  
41  
42  
43  
44  
45  
46  
47  
48  
49

|                            |                             |                                   |      |                                                                     |                                                                                                         |                                         |                                                                |                                            |              |                                                                                                                                                                                                  |        |
|----------------------------|-----------------------------|-----------------------------------|------|---------------------------------------------------------------------|---------------------------------------------------------------------------------------------------------|-----------------------------------------|----------------------------------------------------------------|--------------------------------------------|--------------|--------------------------------------------------------------------------------------------------------------------------------------------------------------------------------------------------|--------|
| Glaser N <sup>115</sup>    | 2016, Malawi, East          | Lighthouse Clinic                 | 363  | 116 HIV +ve patients and 247 HIV -ve patients                       | Age (years): 34.1 ±10.9<br>Male gender: 52%<br>BMI(kg/m <sup>2</sup> ): 23.2±4.8<br>Hypertension: 13.5% | KDOQI                                   | Proteinuria by dipstick and ACR, eGFR by CG, MDRD, and CKD-EPI | IDMS calibrated creatinine and cystatin -C | 12.1%        | <b>Total prevalence : 13%</b><br>Prevalence among HIV+ve: 22%<br>Prevalence among HIV-ve: 9%                                                                                                     | Medium |
| Kamkuemah M <sup>167</sup> | 2015, South Africa, South   | Gugulethu Community Health Centre | 1092 | HIV infected patients initiated ART therapy                         | Age (years): 34 (IQR: 29- 41)<br>Male gender: 38%                                                       | eGFR < 60 ml/min                        | eGFR by CG                                                     | Not mentioned                              | Not measured | <b>Total prevalence: 2%</b><br><b>Prevalence by age:</b><br><29 years: 17%<br>29–34 years: 28%<br>34–41 years: 5%<br>>41 years: 50%<br><b>Prevalence by gender:</b><br>Male: 28%<br>Females: 72% | Medium |
| Sagha D <sup>149</sup>     | 2015, Cameroon Central-West | Government hospitals              | 200  | HIV patients on HAART, DOTS or on the combined therapy (HAART/DOTS) | Age (years): 38.04 ± 10.52<br>Male gender: 50.5%                                                        | eGFR <60 ml/min per 1.73 m <sup>2</sup> | eGFR by MDRD                                                   | Kinetic Jaffe                              | Not measured | <b>Total prevalence: 8%</b>                                                                                                                                                                      | Low    |
| Odongo P <sup>94</sup>     | 2015,                       | infectious                        | 361  | Newly diagnosed                                                     | Age (years): 31.4                                                                                       | eGFR <60                                | Proteinuria                                                    | Not                                        | Proteinuria  | <b>Total prevalence:</b>                                                                                                                                                                         | Low    |

1  
2  
3  
4  
5  
6  
7  
8  
9  
10  
11  
12  
13  
14  
15  
16  
17  
18  
19  
20  
21  
22  
23  
24  
25  
26  
27  
28  
29  
30  
31  
32  
33  
34  
35  
36  
37  
38  
39  
40  
41  
42  
43  
44  
45  
46  
47  
48  
49

|  |                                 |                                                                            |     |                                   |                                                                                       |                                                                                                                                         |                                                                                  |                  |                  |                                                                                                                |        |
|--|---------------------------------|----------------------------------------------------------------------------|-----|-----------------------------------|---------------------------------------------------------------------------------------|-----------------------------------------------------------------------------------------------------------------------------------------|----------------------------------------------------------------------------------|------------------|------------------|----------------------------------------------------------------------------------------------------------------|--------|
|  | Uganda,<br>East                 | diseases<br>clinic of<br>Gulu<br>Regional<br>Referral<br>Hospital          |     | HIV patients not<br>receiving ART | ± 9.5<br>Male gender:<br>36.3%<br>BMI(kg/m <sup>2</sup> ) <18:<br>33%                 | ml/min per 1.73<br>m <sup>2</sup>                                                                                                       | by dipstick<br>and eGFR<br>by MDRD                                               | mentioned        | ≥ +1: 52%        | <b>14.4%</b><br><br><b>Prevalence by<br/>gender:</b><br>Females: 16.5%<br>Males: 10.4%                         |        |
|  | 2016,<br>Nigeria,<br>West       | University of<br>Benin<br>Teaching<br>Hospital                             | 383 | HIV infected<br>naïve patients    | Age (years): 36.03<br>± 9.08<br>Male gender: 41%                                      | eGFR <60<br>ml/min per 1.73<br>m <sup>2</sup> and/or<br>evidence of<br>kidney injury as<br>detected when the<br>PCR (mg/g) was<br>≥200. | Quantitative<br>assessment<br>of<br>proteinuria<br>by PCR and<br>eGFR by<br>MDRD | Kinetic<br>Jaffe | Not<br>mentioned | <b>Total prevalence:<br/>53.5%</b>                                                                             | Low    |
|  | 2016, South<br>Africa,<br>South | Medical in-<br>patients at<br>the Chris<br>Hani<br>Baragwanath<br>Hospital | 100 | HIV infected<br>naïve patients    | Age (years):<br>37.0±9.6<br>Male gender: 60%<br>BMI(kg/m <sup>2</sup> ): 20.9<br>±5.1 | eGFR <60<br>ml/min per 1.73<br>m <sup>2</sup>                                                                                           | eGFR by<br>CG, MDRD,<br>CKD-EPI                                                  | IDMS             | Not<br>measured  | <b>Total prevalence:<br/>16%</b>                                                                               | Low    |
|  | 2015, South<br>Africa,<br>South | Rural<br>Medical<br>Centre                                                 | 903 | HIV infected<br>adult patients    | Age (years):<br>40(IQR:34-48)<br>Male gender: 31%<br>Diabetes mellitus:<br>4%         | Albuminuria or<br>eGFR <60<br>ml/min / 1.73 m <sup>2</sup>                                                                              | Albuminuria<br>by ACR and<br>eGFR by<br>MDRD and<br>CKD-EPI                      | Not<br>mentioned | 21%              | <b>Total prevalence<br/>(albuminuria):<br/>21%</b><br><b>2% had eGFR &lt; 60<br/>ml/min/1.73 m<sup>2</sup></b> | Medium |

1  
2  
3  
4  
5  
6  
7  
8  
9  
10  
11  
12  
13  
14  
15  
16  
17  
18  
19  
20  
21  
22  
23  
24  
25  
26  
27  
28  
29  
30  
31  
32  
33  
34  
35  
36  
37  
38  
39  
40  
41  
42  
43  
44  
45  
46  
47  
48  
49

|                          |                           |                                                      |     |                                             |                                                                                                                                                                                                                                       |                                         |                          |               |              |                                          |        |
|--------------------------|---------------------------|------------------------------------------------------|-----|---------------------------------------------|---------------------------------------------------------------------------------------------------------------------------------------------------------------------------------------------------------------------------------------|-----------------------------------------|--------------------------|---------------|--------------|------------------------------------------|--------|
|                          |                           |                                                      |     |                                             | Hypertension:<br>23%                                                                                                                                                                                                                  |                                         |                          |               |              |                                          |        |
| Zachor H <sup>157</sup>  | 2016, South Africa, South | Outpatient infectious clinic at an academic hospital | 650 | HIV infected patients initiating ART        | Age (years):<br>37.9±9.4<br>Male gender:<br>35.5%<br>Diabetes mellitus:2.2%<br>Hypertension:<br>7.8%                                                                                                                                  | eGFR <60 ml/min per 1.73 m <sup>2</sup> | eGFR by MDRD and CKD-EPI | IDMS          | Not measured | <b>Total prevalence:</b><br><b>2 %</b>   | Medium |
| Mekuria Y <sup>150</sup> | 2016, Ethiopia, East      | Jimma University Specialized Hospital                | 446 | (223 HAART naïve and 223 HAART experienced) | Age ( years):<br>HAART naïve:<br>38.25 ±10.8,<br>HAART +ve:<br>35.14 ±9.2<br>Male gender: 37%<br>BMI(kg/m <sup>2</sup> ) :<br>HAART naïve:<br>20.7±3.2, HAART +ve: 21.6 ±3.5<br>Hypertension:<br>3.36%<br>Diabetes mellitus:<br>21.4% | eGFR <60 ml/min per 1.73 m <sup>2</sup> | eGFR by CG               | Kinetic Jaffe | Not measured | <b>Total prevalence:</b><br><b>18.2%</b> | Medium |

DM: diabetes mellitus, BMI: body mass index, SBP: systolic blood pressure, DBP: diastolic blood pressure, IDMS: Isotope dilution mass spectrometry, HAART: highly active antiretroviral therapy, DOTS: directly

observed treatment short course, ART: antiretroviral therapy, MDRD: Modification of Diet in Renal Disease, CG: Cockcroft Gault , CKD-EPI: Chronic Kidney Disease Epidemiology , IQR: inter-quartile range , KDOQI: Kidney Disease Outcome Quality Initiative

For peer review only

Table 4: Studies on CKD among diabetic patients

| Study ID                    | Year, Country, Region | Location                                                     | N   | Study group                   | Population Characteristics                                                                                                                                                                            | Definition of CKD                                                                                               | Method of outcome assessment                                | Creatinine assay | proteinuria                                        | CKD prevalence                                       | Quality assessment |
|-----------------------------|-----------------------|--------------------------------------------------------------|-----|-------------------------------|-------------------------------------------------------------------------------------------------------------------------------------------------------------------------------------------------------|-----------------------------------------------------------------------------------------------------------------|-------------------------------------------------------------|------------------|----------------------------------------------------|------------------------------------------------------|--------------------|
| Janmohamed MN <sup>86</sup> | 2013, Tanzania, East  | diabetes mellitus clinic of Bugando Medical Centre in Mwanza | 369 | Consecutive diabetic patients | Age (years): 54 (IQR: 45-62)<br>Male gender: 46.6%<br>Hypertension: 57.5%<br>BMI (kg/m <sup>2</sup> ): 25.6 (IQR: 22.6–29.6)<br>Duration of DM (years): 6(3 – 11)<br>93.8% type 2 DM<br>6.2% type 1DM | eGFR $\leq$ 60 ml/min/1.73 m <sup>2</sup> or evidence of kidney damage (microalbuminuria or overt proteinuria). | Microalbuminuria, proteinuria by urinary strips, eGFR by CG | Kinetic Jaffe    | Overt proteinuria (34.1%), microalbuminuria(45.8%) | <b>Total prevalence:83.7%</b>                        | Low                |
| Wanjohi FW <sup>87</sup>    | 2002, Kenya, East     | Outpatient diabetic clinic at Kenyatta National Hospital     | 100 | Type 2 diabetic patients      | Age (years): 53.7 $\pm$ 9.3<br>Male gender: 37%<br>Hypertension: 50%<br>BMI (kg/m <sup>2</sup> ): 27.8 $\pm$ 6.0<br>Duration of DM (months): 10.3 $\pm$ 7.5                                           | Albuminuria > 20 mg/ L                                                                                          | Albuminuria by urinary strip, CG                            | Not mentioned    | 26% had albuminuria                                | <b>Total prevalence( based on albuminuria ): 26%</b> | Low                |

|                          |                              |                                                                                         |     |                                                     |                                                                                                                                                |                                                                                                               |                                               |               |                                                       |                                |     |
|--------------------------|------------------------------|-----------------------------------------------------------------------------------------|-----|-----------------------------------------------------|------------------------------------------------------------------------------------------------------------------------------------------------|---------------------------------------------------------------------------------------------------------------|-----------------------------------------------|---------------|-------------------------------------------------------|--------------------------------|-----|
| Bouزيد C <sup>119</sup>  | 2011, Tunis, North           | Endocrinology center at the National Institute of nutrition                             | 689 | Type 2 diabetic patients from computerized hospital | Age (years): 60±11<br>Male gender: 39%<br>Hypertension: 84.6% (renal insufficiency), 57.2% (no renal disease)<br>Duration of DM (years): 11±8  | eGFR<60 ml/min                                                                                                | CG, 24-hour proteinuria                       | Not mentioned | 10.1%<br>macroalbuminuria,<br>13%<br>microalbuminuria | <b>Total prevalence: 19.8%</b> | Low |
| Choukem SP <sup>88</sup> | 2012, Cameroon, Central-West | Two main referral centres                                                               | 420 | Consecutive type 2 diabetic patients                | Age (years): 56.7 ±9.9<br>Male gender: 49%<br>Hypertension: 50%<br>BMI (kg/m <sup>2</sup> ): 28.5 ±5.2<br>Duration of DM (years): 4 (IQR: 1-9) | The presence of positive proteinuria with or without low CrCl < 90 ml/min/1.73 m <sup>2</sup>                 | Proteinuria by urinary strip/eGFR by CG       | Not mentioned |                                                       | <b>Total prevalence: 31%</b>   | Low |
| Keeton G <sup>120</sup>  | 2004, South Africa, South    | Groote Schuur Hospital Outpatients Diabetic Clinic or the Somerset Hospital Outpatients | 59  | Type 2 diabetic patients                            | Age (years): 62 ±9.4<br>Male gender: 36%<br>BMI (kg/m <sup>2</sup> ): (31± 6)<br>Duration of DM (years): 17 (Range: 14-33)                     | Double Scr level                                                                                              | Proteinuria by PCR, and serum creatinine      | Not mentioned |                                                       | <b>Total prevalence: 66.1%</b> | Low |
| BouAziz <sup>121</sup>   | 2012, Tunisia, North         | Basic Health Group of Sousse                                                            | 115 | 73 type 2 diabetic patients and 42 healthy          | Age (mean ±SE in years): 59.3 ±1.1<br>Male gender: 35%<br>SBP (mean ±SE mmHg): 136.3 ±3.1                                                      | Microalbuminuria (defined as < 2.8 g/mmol for women and < 2.3 for men) and eGFR≤60 ml/min/1.73 m <sup>2</sup> | Measurement of microalbuminuria, eGFR by MDRD | Not mentioned |                                                       | <b>Total prevalence: 11%</b>   | Low |

|                                |                             |                                           |     |                                                         |                                                                                                                                                                  |                         |                                                                        |                  |                                               |                                                                        |     |
|--------------------------------|-----------------------------|-------------------------------------------|-----|---------------------------------------------------------|------------------------------------------------------------------------------------------------------------------------------------------------------------------|-------------------------|------------------------------------------------------------------------|------------------|-----------------------------------------------|------------------------------------------------------------------------|-----|
|                                |                             |                                           |     | volunteers                                              | DBP (mean $\pm$ SE): 76.8<br>$\pm$ 1.9<br>BMI (mean $\pm$ SE in kg/m <sup>2</sup> ):<br>30.5 $\pm$ 0.7<br>Duration of DM (years):<br>10.6 $\pm$ 1                |                         |                                                                        |                  |                                               |                                                                        |     |
| Katchunga<br>P <sup>122</sup>  | 2010,<br>Congo,<br>Central  | Referral<br>general<br>hospital           | 98  | Medical<br>records of<br>type 2<br>diabetic<br>patients | Age (years): 58 $\pm$ 10.4<br>Male gender: 35.7%<br>Hypertension: 59.2%<br>BMI (kg/m <sup>2</sup> ): 25.2 $\pm$ 4.7<br>Duration of DM (years):<br>17.3 $\pm$ 8.5 | KDOQI                   | Microalbumin<br>uria (>20 mg/L<br>and <200<br>mg/L)<br>eGFR by<br>MDRD | Not<br>mentioned |                                               | <b>Total prevalence:<br/>66%</b>                                       | Low |
| Djrolo F <sup>123</sup>        | 2001, Benin,<br>West        | National<br>University<br>hospital centre | 152 | Type 1<br>and 2<br>diabetic<br>patients                 | Age (years): 53.3(range,<br>21-90)<br>Male gender: 65.8%<br>Duration of DM (years):<br><1 – 16 or more                                                           | Presence of proteinuria | 24-hour<br>proteinuria                                                 | Not<br>measured  | 28%                                           | <b>Total prevalence (<br/>based on<br/>proteinuria level):<br/>28%</b> | Low |
| Balogun<br>WO <sup>102</sup>   | 2011,<br>Nigeria,<br>West   | Tertiary<br>hospital                      | 40  | Randomly<br>selected<br>type 2<br>diabetic<br>patients  | Age (years): 59.4 $\pm$ 11.25<br>Male gender: 37.5%<br>Hypertension: 45%                                                                                         | not mentioned           | Proteinuria by<br>urinary strip<br>and 24 hrs,<br>eGFR by CG           | Jaffe<br>method  | 82.5%<br>macroalbuminuria                     | <b>Total prevalence:<br/>90%</b>                                       | Low |
| Mafundikwa<br>A <sup>103</sup> | 2007,<br>Zimbabwe,<br>South | Diabetic clinic                           | 75  | Consecuti<br>ve Insulin-<br>dependent                   | No available data                                                                                                                                                | No available data       | Proteinuria by<br>urinary strips<br>and 24-hour                        |                  | Overt proteinuria<br>21%.<br>Microalbuminuria | <b>Total prevalence:<br/>33%</b>                                       | Low |



|                         |                      |                                     |     |                                            |                                                                                                                                                                                                                                                  |                                                                                                                                                                                                                    |                                                    |               |                                                                                                                         |                                                                                                                      |        |
|-------------------------|----------------------|-------------------------------------|-----|--------------------------------------------|--------------------------------------------------------------------------------------------------------------------------------------------------------------------------------------------------------------------------------------------------|--------------------------------------------------------------------------------------------------------------------------------------------------------------------------------------------------------------------|----------------------------------------------------|---------------|-------------------------------------------------------------------------------------------------------------------------|----------------------------------------------------------------------------------------------------------------------|--------|
|                         |                      |                                     |     | diabetic patients                          |                                                                                                                                                                                                                                                  |                                                                                                                                                                                                                    | proteinuria                                        |               | 12%.                                                                                                                    |                                                                                                                      |        |
| Lutale J <sup>124</sup> | 2007, Tanzania, East | Outpatient diabetic clinic          | 204 | 91 Type 1 and 153 type 2 diabetic patients | 45% type 1 DM<br>55% type 2DM<br>Age (years): type 1, 21(14–44.8), type 2, 53 (23.5–85)<br>Male gender: 55%<br>hypertension: 42%<br>BMI (kg/m <sup>2</sup> ): 19.3 ± 3.8 (type 1), 27.8 ± 4.8 (type 2)<br>Duration of DM (years): 3(Range: 0-25) | KDOQI                                                                                                                                                                                                              | Quantitative assessment of albuminuria, CrCl by CG | Kinetic Jaffe | Type 1: microalbuminuria was 12.1% and macroalbuminuria 1.1%.<br>Type 2: microalbuminuria 9.8%<br>Macroalbuminuria 7.2% | <b>Total prevalence: 18.5%</b><br>4.6% of Type 1 patients and 22% of Type 2 had eGFR < 60 ml/min/1.73 m <sup>2</sup> | Low    |
| Gill G <sup>125</sup>   | 2008, Ethiopia, East | Diabetic clinic at Mekelle Hospital | 105 | All diabetic patients                      | Age (years): 41±16<br>Male gender: 70%<br>Hypertension: 5%<br>BMI (kg/m <sup>2</sup> ): 20.6 ±5.4<br>Duration of DM (years): 7±6                                                                                                                 | Nephropathy was considered present if the urinary ACR was >25.0mg/mmol and retinopathy was present. Microalbuminuria was diagnosed if the ACR was >2.5 and <25.0mg/mmol in men and >3.5 and <25.0mg/mmol in women. | ACR, Scr                                           | Not mentioned | 51% microalbuminuria                                                                                                    | <b>Total prevalence : 51%,</b>                                                                                       | Low    |
| Makulo R <sup>111</sup> | 2010, Congo, Central | Community based                     | 229 | 81 Diabetic and 148 impaired fasting       | Age (years): 53.1±16.3<br>Male gender: 33%<br>SBP (mmHg): 128.0±5.7<br>DBP (mmHg): 78.5±13.4<br>BMI (kg/m <sup>2</sup> ): 22.6±5.2                                                                                                               | eGFR of <60 mL/min/1.73 m <sup>2</sup>                                                                                                                                                                             | Urinary albumin by urinary strip and eGFR by       | Kinetic Jaffe | 29.6%                                                                                                                   | <b>Total prevalence: 29.6%</b><br>10% of the patients had eGFR< 60                                                   | Medium |

|                            |                                           |                                                                          |      |                                                        |                                                                                                                                                                                                   |                                        |                                               |               |                                                   |                                                                                   |        |
|----------------------------|-------------------------------------------|--------------------------------------------------------------------------|------|--------------------------------------------------------|---------------------------------------------------------------------------------------------------------------------------------------------------------------------------------------------------|----------------------------------------|-----------------------------------------------|---------------|---------------------------------------------------|-----------------------------------------------------------------------------------|--------|
|                            |                                           |                                                                          |      | glucose patients                                       |                                                                                                                                                                                                   |                                        | 186MDRD                                       |               |                                                   | ml/min/1.73 m <sup>2</sup>                                                        |        |
| Adebamowo S <sup>151</sup> | 2016, Nigeria, Ghana, Kenya (sub-Saharan) | University medical centers and surrounding communities                   | 4815 | 2208 Cases of type 2 DM and 2607 controls free from DM | Age (years): 48±15<br>Male gender:41%<br>Hypertension: ( 68.3% of type 2 DM, and 35.3% of diabetic-free)<br>BMI(kg/m <sup>2</sup> ): 26.9 ± 5.4 (diabetic patients)<br>25.5 ± 5.7 (non-diabetics) | eGFR of <60 ml/min/1.73 m <sup>2</sup> | eGFR by MDRD and CKD-EPI                      | Kinetic Jaffe | Not measured                                      | <b>Total prevalence (MDRD): 9%</b><br>13.4% of type 2DM and 4.8% of diabetic free | Medium |
| Feteh V <sup>95</sup>      | 2016, Cameroon, Central-West              | out-patient section of the endocrine unit of the Douala General Hospital | 636  | Cases of type 2 DM                                     | Age (years): 56.5 ± 10.6<br>Male gender: 53.1%<br>BMI (kg/m <sup>2</sup> ): 29.3 ± 14.7<br>Hypertension: 62.2%                                                                                    | eGFR of <60 ml/min/1.73 m <sup>2</sup> | Proteinuria by dipsticks and eGFR by 186 MDRD | Kinetic Jaffe | 68.4% among anemic patients ,<br>57.6% non anemic | <b>Total prevalence: 18.5%</b>                                                    | Low    |
| Fiseha T <sup>152</sup>    | 2014, Ethiopia, East                      | Follow-up clinic at Butajira hospital                                    | 214  | Diabetic patients                                      | Age (years): 45 ± 14.5<br>Male gender: 57.5%<br>SBP(mmHg): 121 ± 17<br>DBP(mmHg): 79 ± 10<br>BMI(kg/m <sup>2</sup> ): 25.26 ± 4.35                                                                | eGFR of <60 ml/min/1.73 m <sup>2</sup> | eGFR by CG and 186 MDRD                       | Kinetic Jaffe | Not measured                                      | <b>Total prevalence (MDRD): 18.2%</b><br>Prevalence (CG):23.8%                    | Medium |
| Pillay S <sup>96</sup>     | 2016, South Africa,                       | All patients seen at Edendale                                            | 653  | Diabetic patients with or                              | Among diabetic patients with HIV:<br>Age( years): 50-70                                                                                                                                           | eGFR of <60 ml/min/1.73 m <sup>2</sup> | Proteinuria by dipstick and eGFR by 186       | Kinetic Jaffe | 18%                                               | <b>Total prevalence : 18.8%</b>                                                   | Medium |

|                        |                   |                                                                                            |     |                                                  |                                                                                                       |                                                               |                                                       |               |       |                                                                                                          |     |
|------------------------|-------------------|--------------------------------------------------------------------------------------------|-----|--------------------------------------------------|-------------------------------------------------------------------------------------------------------|---------------------------------------------------------------|-------------------------------------------------------|---------------|-------|----------------------------------------------------------------------------------------------------------|-----|
|                        | South             | Hospital diabetic clinic                                                                   |     | without HIV (149 DM and HIV; 504 DM without HIV) | Male gender: 32%<br>Among diabetic patients without HIV<br>Age ( years): 51-60                        |                                                               | MDRD                                                  |               |       |                                                                                                          |     |
| Eghan B <sup>138</sup> | 2007, Ghana, West | Outpatient diabetic clinic of the department of medicine at Komfo Anokye Teaching Hospital | 109 | Diabetic patients                                | Age (years): 54.1±10.9<br>Male gender: 28%<br>Hypertension: 39%<br>BMI(kg/m <sup>2</sup> ): 26.3± 4.4 | microalbuminuria if urine albumin excretion was 30–300 mg/day | Albuminuria by urine albumin excretion and eGFR by CG | Not mentioned | 43.1% | <b>Total prevalence( based on microalbuminuria ): 43.1%</b><br><b>Prevalence by gender: Males: 31.9%</b> | Low |

DM: diabetes mellitus, BMI: body mass index, SBP: systolic blood pressure, DBP: diastolic blood pressure, IDMS: Isotope dilution mass spectrometry, MDRD: Modification of Diet in Renal Disease, CG: Cockcroft Gault , CKD-EPI: Chronic Kidney Disease Epidemiology Collaboration, IQR: inter-quartile range , KDOQI: Kidney Disease Outcome Quality Initiative

**Table 5: Studies on CKD among hypertensive patients**

| Study ID               | Year<br>Country<br>Region | Location               | N   | Study group                                   | Population characteristics                                                                                                                                                                                                                                                    | Definition of CKD                   | Method of outcome assessment                                 | Creatinine assay | Proteinuria  | CKD prevalence                                                                                                                                                         | Quality assessment |
|------------------------|---------------------------|------------------------|-----|-----------------------------------------------|-------------------------------------------------------------------------------------------------------------------------------------------------------------------------------------------------------------------------------------------------------------------------------|-------------------------------------|--------------------------------------------------------------|------------------|--------------|------------------------------------------------------------------------------------------------------------------------------------------------------------------------|--------------------|
| Osafo C <sup>126</sup> | 2011<br>Ghana,<br>West    | four polyclinics       | 712 | Hypertensive patients                         | Age (years): 59 (range,19–90)<br>Male gender: 21.3%<br>DM: 14.7%<br>SBP (mmHg): 150 (range,100–280)<br>DBP (mmHg): 90 (range, 60–160)<br>BMI (kg/m <sup>2</sup> ): 29.7 (range,12.2–67.4)<br>BMI categories (kg/m <sup>2</sup> ):<br><25: 22.3%<br>25-29.9: 26%<br>>30: 45.7% | KDOQI                               | Proteinuria by PCR (men>0.3 women>0.2 mg/mg)<br>eGFR by MDRD | Kinetic Jaffe    | 28.90%       | <b>Total prevalence:</b> 46.90%<br><b>Prevalence by stage:</b><br>Stage 1-2: 19.1%<br>Stage 3-5: 27.8%<br><b>Prevalence by gender:</b><br>Females: 46.6%<br>Males: 48% | Low                |
| Ajayi S <sup>164</sup> | 2014<br>Nigeria,<br>West  | Tertiary health centre | 628 | Records of hypertensive and diabetic patients | Age (years): 49.71±13.22<br>Male gender : 49%<br>DM: 8.6%<br>SBP (mmHg): 135.9 ± 27.4<br>DBP (mmHg): 87.0 ± 16.3<br>BMI ( kg/m <sup>2</sup> ): 27.8 ± 8.7                                                                                                                     | eGFR <60 mL/min/1.73 m <sup>2</sup> | eGFR by MDRD                                                 | Not mentioned    | Not measured | <b>Total prevalence:</b> 38.5%<br><b>Prevalence by age:</b><br><20 years:                                                                                              | Low                |

1  
2  
3  
4  
5  
6  
7  
8  
9  
10  
11  
12  
13  
14  
15  
16  
17  
18  
19  
20  
21  
22  
23  
24  
25  
26  
27  
28  
29  
30  
31  
32  
33  
34  
35  
36  
37  
38  
39  
40  
41  
42  
43  
44  
45  
46  
47  
48  
49

|                             |                              |                                                           |      |                                              |                                              |                                                                                                                          |                                               |                  |              |                              |                                         |        |
|-----------------------------|------------------------------|-----------------------------------------------------------|------|----------------------------------------------|----------------------------------------------|--------------------------------------------------------------------------------------------------------------------------|-----------------------------------------------|------------------|--------------|------------------------------|-----------------------------------------|--------|
|                             |                              |                                                           |      |                                              |                                              |                                                                                                                          |                                               |                  |              | 0.1%                         |                                         |        |
|                             |                              |                                                           |      |                                              |                                              |                                                                                                                          |                                               |                  |              | 21–40 years:                 |                                         |        |
|                             |                              |                                                           |      |                                              |                                              |                                                                                                                          |                                               |                  |              | 31.5%                        |                                         |        |
|                             |                              |                                                           |      |                                              |                                              |                                                                                                                          |                                               |                  |              | 41–60 years:                 |                                         |        |
|                             |                              |                                                           |      |                                              |                                              |                                                                                                                          |                                               |                  |              | 34.7%                        |                                         |        |
|                             |                              |                                                           |      |                                              |                                              |                                                                                                                          |                                               |                  |              | 61–75 years:                 |                                         |        |
|                             |                              |                                                           |      |                                              |                                              |                                                                                                                          |                                               |                  |              | 40%                          |                                         |        |
|                             |                              |                                                           |      |                                              |                                              |                                                                                                                          |                                               |                  |              | >75 years:                   |                                         |        |
|                             |                              |                                                           |      |                                              |                                              |                                                                                                                          |                                               |                  |              | 62.9%                        |                                         |        |
|                             |                              |                                                           |      |                                              |                                              |                                                                                                                          |                                               |                  |              | <b>Prevalence by gender:</b> |                                         |        |
|                             |                              |                                                           |      |                                              |                                              |                                                                                                                          |                                               |                  |              | <b>Females:57%</b>           |                                         |        |
|                             |                              |                                                           |      |                                              |                                              |                                                                                                                          |                                               |                  |              | <b>Males: 18.9%</b>          |                                         |        |
| Lengani A <sup>127</sup>    | 2000<br>Burkina Faso<br>West | department<br>of<br>Cardiology<br>or Internal<br>medicine | 342  | Hypertensive<br>patients                     | Age (years): 50.6 ±13.8<br>Male gender: 58%  | Serum creatinine ≥<br>650 μmol/l and or<br>blood urea ≥35<br>mmol/l plus long<br>history with clinical<br>manifestations | Measurement of<br>scr, 24-hour<br>proteinuria | Not<br>mentioned |              |                              | <b>Total<br/>prevalence:<br/>50.8%</b>  | Low    |
| Nwankwo<br>E <sup>165</sup> | 2006<br>Nigeria<br>West      | University<br>of<br>Maiduguri<br>Teaching<br>Hospital     | 185  | All hospitalized<br>hypertensive<br>patients | Age (years): 44.6 ± 14.9<br>Male gender: 49% | Scr >135 μmol/l                                                                                                          | Measurement of<br>Scr                         | Not<br>mentioned | Not measured |                              | <b>Total<br/>prevalence:<br/>45.50%</b> | Low    |
| Rayner B <sup>128</sup>     | 2006                         | 100 General                                               | 1091 | Random                                       | Age (years): ≥35 years                       | Albuminuria defined                                                                                                      | Quantitative                                  | not              | 21.3%        |                              | <b>Total</b>                            | Medium |

|                              |                        |                                                                                |     |                                                                                |                                                                                                                                                                                                                                             |                                                                                                                                                        |                                                                          |                         |                                           |                                                                                                      |        |
|------------------------------|------------------------|--------------------------------------------------------------------------------|-----|--------------------------------------------------------------------------------|---------------------------------------------------------------------------------------------------------------------------------------------------------------------------------------------------------------------------------------------|--------------------------------------------------------------------------------------------------------------------------------------------------------|--------------------------------------------------------------------------|-------------------------|-------------------------------------------|------------------------------------------------------------------------------------------------------|--------|
|                              | South Africa<br>South  | practice<br>centres                                                            |     | hypertensive<br>patients                                                       | Male gender: 48.5%<br>BMI: 23.6% of the patients had a normal BMI<br>41.9% were overweight and 34.2% were frankly obese                                                                                                                     | as (mg/mmol)<br>microalbuminuria 3-30<br>macroalbuminuria >30                                                                                          | assessment of<br>albuminuria by<br>ACR                                   | measured                | microalbuminuria 4.1%<br>macroalbuminuria | <b>prevalence (based on albuminuria): 25.4%</b>                                                      |        |
| Plange-Rhule J <sup>89</sup> | 1999<br>Ghana,<br>West | Komfo<br>Anokye<br>Teaching<br>Hospital                                        | 448 | Hypertensive<br>patients                                                       | Age (years): 50.5 ±13.0<br>Male gender: 36%<br>SBP (mmHg): 165.0 ±27.8<br>DBP (mmHg): 101.9 ±17.9                                                                                                                                           | Plasma creatinine<br>≥140mol/l                                                                                                                         | Proteinuria by<br>urinary strips and<br>serum creatinine                 | Not<br>mentioned        | 25.50%                                    | <b>Total prevalence: 30.2%</b>                                                                       | Low    |
| Addo J <sup>141</sup>        | 2009<br>Ghana , West   | seven<br>central<br>government<br>ministries in<br>Accra                       | 219 | Hypertensive<br>patients                                                       | Age (years): 50.4± 6.6<br>Male gender: 64%<br>SBP (mmHg):156.0 ±21.5<br>DBP (mmHg): 95 ±13<br>BMI (kg/m <sup>2</sup> ): 27.5 ± 5.4                                                                                                          | Persistent<br>proteinuria on<br>Urinalysis in the<br>absence of urinary<br>tract infection<br>and/or impaired<br>GFR<60 ml/min/<br>1.73 m <sup>2</sup> | Proteinuria and<br>eGFR by MDRD                                          | Enzymatic<br>assessment | 13.4%                                     | <b>Total prevalence: 13.4%</b><br>4.1% had<br>eGFR< 60<br>ml/min/1.73<br>m <sup>2</sup>              | Medium |
| Aryee C <sup>139</sup>       | 2016, Ghana,<br>West   | Komfo<br>Anokye<br>Teaching<br>Hospital and<br>the<br>surrounding<br>community | 242 | 180 non-diabetic<br>hypertensive<br>patients and 61<br>age matched<br>controls | Age (years): 22-87<br>Male gender:37%<br>SBP (mmHg): hypertensive patients( on antihypertensive therapy:155.46±1.82, no antihypertensive therapy:152±3.27), control (117.38±0.96)<br>DBP (mmHg): hypertensive patients( on antihypertensive | eGFR <60<br>ml/min/1.73m <sup>2</sup>                                                                                                                  | Urine albumin<br>excretion, and eGFR<br>by CG , 186 MDRD,<br>and CKD-EPI | Not<br>mentioned        | 30%                                       | <b>Total prevalence (CKD-EPI): 14.5%</b><br>Prevalence by<br>MDRD:13.3%<br>Prevalence by<br>CG:16.6% | Low    |

|                           |                        |                                  |     |                                                            |                                                                                                                                                                                                                                                    |                                                                            |                                             |              |       |                                                            |     |
|---------------------------|------------------------|----------------------------------|-----|------------------------------------------------------------|----------------------------------------------------------------------------------------------------------------------------------------------------------------------------------------------------------------------------------------------------|----------------------------------------------------------------------------|---------------------------------------------|--------------|-------|------------------------------------------------------------|-----|
|                           |                        |                                  |     |                                                            | therapy:101.46±0.94, no antihypertensive therapy: 100.50±1.34), control (73.28±0.77)<br><br>BMI (kg/m <sup>2</sup> ): hypertensive patients( on antihypertensive therapy:29.52±0.39, no antihypertensive therapy: 29.8±0.71), control (29.36±0.65) |                                                                            |                                             |              |       |                                                            |     |
| Nabbaale J <sup>140</sup> | 2015<br>Uganda<br>East | out- patient hypertension clinic | 256 | Newly diagnosed eligible black adult hypertensive patients | Age (years): 54.3 ± 6.2<br>Male gender: 36.7%                                                                                                                                                                                                      | Microalbuminuria as a random urine albumin level between 30 and 299 mg/dl. | Quantitative assessment of albumin in urine | Not measured | 39.5% | <b>Total prevalence (based on microalbuminuria): 39.5%</b> | Low |

DM: diabetes mellitus, BMI: body mass index, SBP: systolic blood pressure, DBP: diastolic blood pressure, IDMS: Isotope dilution mass spectrometry, MDRD: Modification of Diet in Renal Disease, CG: Cockcroft Gault , CKD-EPI: Chronic Kidney Disease Epidemiology Collaboration, IQR: inter-quartile range , KDOQI: Kidney Disease Outcome Quality Initiative

**Table 6: Studies on CKD among other populations**

| Study ID            | Year<br>Country<br>Region | Location              | N  | Study group    | Population Characteristics           | Definition of CKD                    | Method of outcome assessment       | Creatinine assay | Proteinuria | CKD prevalence           | Quality assessment |
|---------------------|---------------------------|-----------------------|----|----------------|--------------------------------------|--------------------------------------|------------------------------------|------------------|-------------|--------------------------|--------------------|
| E.F K <sup>19</sup> | 2013<br>Senegal           | Nephrology department | 43 | Lupus patients | Age (years): 32.9<br>Male gender: 7% | Proteinuria > 0.5 g/24 hours with or | 24-hour proteinuria and eGFR by CG | Not mentioned    | 51%         | <b>Total prevalence:</b> | Low                |

|                                 |                           |                                                                                        |     |                                                                                                                                                      |                                                                                                                                                                                                                                                                                      |                                                                        |                                            |                  |        |                                                                                                                                             |        |
|---------------------------------|---------------------------|----------------------------------------------------------------------------------------|-----|------------------------------------------------------------------------------------------------------------------------------------------------------|--------------------------------------------------------------------------------------------------------------------------------------------------------------------------------------------------------------------------------------------------------------------------------------|------------------------------------------------------------------------|--------------------------------------------|------------------|--------|---------------------------------------------------------------------------------------------------------------------------------------------|--------|
|                                 | West                      | of the<br>Aristide Le<br>Dantec<br>University<br>Hospital<br>Center.                   |     |                                                                                                                                                      | Hypertension: 30%                                                                                                                                                                                                                                                                    | without hematuria/<br>renal insufficiency/<br>abnormal renal<br>biopsy |                                            |                  |        | 72%                                                                                                                                         |        |
| Abd<br>ElHafeez S <sup>29</sup> | 2009<br>Egypt<br>North    | The<br>Nephrology<br>department at<br>the Main<br>Alexandria<br>University<br>hospital | 400 | Relatives of ESRD<br>patients                                                                                                                        | Age (years): 35.2±11.6<br>Male gender: 50.8%<br>Hypertension: 60%<br>DM: 11.5%<br>BMI(kg/m <sup>2</sup> ): 28.5±5.89                                                                                                                                                                 | KDOQI                                                                  | Proteinuria by urinary<br>strips, 186 MDRD | Kinetic Jaffe    | 21.3%  | <b>Total<br/>prevalence<br/>57%</b><br><b>Prevalence<br/>by stage:</b><br>Stage 1: 9%<br>Stage 2:<br>44%<br>Stage 3: 4%<br>Stage 4:<br>0.3% | medium |
| Raji Y <sup>28</sup>            | 2015,<br>Nigeria,<br>West | Nephrology<br>out-patient<br>clinic at<br>Lagos<br>University<br>Teaching<br>Hospital  | 469 | (230 first degree relatives<br>of patients with CKD and<br>230 age- and gender-<br>matched controls with no<br>personal or family history<br>of CKD) | Age (years): 33.49 ± 12.0<br>BMI(kg/m <sup>2</sup> ): first degree<br>relatives: 25.5 ± 5.3,<br>controls: 23.8 ± 4.0<br>SBP(mmHg): first degree<br>relatives: 116.5 ± 22.5,<br>controls: 112.1 ± 18.1<br>DBP(mmHg): first degree<br>relatives: 74.9 ± 12.7,<br>controls: 71.4 ± 10.5 | Reduced eGFR                                                           | Albuminuria by ACR and<br>eGFR by MDRD     | Not<br>mentioned | 46%    | <b>Total<br/>prevalence:<br/>4%</b>                                                                                                         | Low    |
| ElSharif M <sup>24</sup>        | 2013                      | Primary                                                                                | 252 | Patients attending the                                                                                                                               | Age (years): 43.35± 12.80                                                                                                                                                                                                                                                            | eGFR of < 60                                                           | Proteinuria by urinary                     | Not              | 24.21% | <b>Total</b>                                                                                                                                | Low    |



|                          |                       |                                   |     |                                                                   |                                                                                                                                                                     |                                                                                                                                                                                |                                                             |                   |       |                                                                                                                                                  |        |
|--------------------------|-----------------------|-----------------------------------|-----|-------------------------------------------------------------------|---------------------------------------------------------------------------------------------------------------------------------------------------------------------|--------------------------------------------------------------------------------------------------------------------------------------------------------------------------------|-------------------------------------------------------------|-------------------|-------|--------------------------------------------------------------------------------------------------------------------------------------------------|--------|
|                          | Sudan East            | health care                       |     | primary health care facilities                                    | Male gender: 16%<br>Hypertension: 10%<br>DM: 5.95%<br>BMI (kg/m <sup>2</sup> ): 28.67 ± 6.43<br>BMI categories (kg/m <sup>2</sup> ):<br><18: 2.38%<br>>25.13: 71.83 | mL/min/<br>1.73 m <sup>2</sup> with or without proteinuria.                                                                                                                    | strip and eGFR by MDRD                                      | mentioned         |       | <b>prevalence:</b><br><b>10.32%</b>                                                                                                              |        |
| Mo A <sup>26</sup>       | 2009<br>Nigeria West  | Family practice clinic            | 250 | Newly registered patients who attended the Family Practice Clinic | Age (years): 50.52 ± 13.03<br>Male gender: 27.2%<br>32% elevated SBP, 30% elevated DBP<br>DM: 6%<br>Obesity: 32%                                                    | Persistently abnormal ACR irrespective of GFR level or persistent eGFR < 60 mL/min/1.73 m <sup>2</sup> irrespective of the presence or absence of Kidney damage after 3 months | Proteinuria by urinary strip, eGFR by MDRD                  | Standardized IDMS | 14.4% | <b>Total prevalence:</b><br><b>14.4%</b><br>10.4% had persistent eGFR < 60 mL/min/1.73 m <sup>2</sup>                                            | Medium |
| Sumaili EK <sup>25</sup> | 2009<br>Congo Central | Primary and secondary health care | 527 | At risk population randomly selected                              | Age (years): 53.9 ± 15.5<br>Male gender: 43%<br>Hypertension: 58.2%<br>DM: 54.5%<br>Obesity: 16%                                                                    | KDOQI                                                                                                                                                                          | Proteinuria by urinary strip, 24-hour proteinuria, 175 MDRD | Kinetic Jaffe     | 19%   | <b>Total prevalence:</b><br><b>36%</b><br><b>Prevalence by stage</b><br>stage 1: 4.2%,<br>stage 2: 6.1%, stage 3: 18.3%,<br>stage 4: 1.9%, stage | High   |

1  
2  
3  
4  
5  
6  
7  
8  
9  
10  
11  
12  
13  
14  
15  
16  
17  
18  
19  
20  
21  
22  
23  
24  
25  
26  
27  
28  
29  
30  
31  
32  
33  
34  
35  
36  
37  
38  
39  
40  
41  
42  
43  
44  
45  
46  
47  
48  
49

|                                 |                                    |                                                                 |      |                                                                     |                                                                                                                                                    |                                                                                                                         |                                                                  |                                         |                                   |                                        |     |
|---------------------------------|------------------------------------|-----------------------------------------------------------------|------|---------------------------------------------------------------------|----------------------------------------------------------------------------------------------------------------------------------------------------|-------------------------------------------------------------------------------------------------------------------------|------------------------------------------------------------------|-----------------------------------------|-----------------------------------|----------------------------------------|-----|
|                                 |                                    |                                                                 |      |                                                                     |                                                                                                                                                    |                                                                                                                         |                                                                  |                                         |                                   | 5: 5.7%                                |     |
| Anyabolu E <sup>30</sup>        | 2016,<br>Nigeria,<br>West          | Federal<br>Medical<br>Center                                    | 136  | Subjects from medical<br>out-patient department of<br>the hospital. | Age (years): 38.58±11.79<br>Male gender: 27.9%<br>BMI(kg/m <sup>2</sup> ): 25.51±6.47                                                              | Proteinuria as 24<br>hours protein ≥<br>0.300g and impaired<br>renal filtration<br>function as CrCl<br><90mls/min       | Proteinuria by quantitative<br>assessment and Scr                | Kinetic Jaffe                           | 14.1% had<br>proteinuria          | <b>Total<br/>prevalence:<br/>14.1%</b> | Low |
| Dessein P <sup>20</sup>         | 2015,<br>South<br>Africa,<br>South | Charlotte<br>Maxeke<br>Johannesburg<br>and Milpark<br>Hospitals | 233  | African patients with<br>rheumatoid arthritis                       | Age (years): 57.1±10.8<br>Male gender: 17.2%<br>BMI(kg/m <sup>2</sup> ): 27.4±6.0<br>Hypertension: 57.5%<br>Diabetes mellitus: 12.5%               | eGFR<<br>60ml/min/1.73m <sup>2</sup>                                                                                    | eGFR by CG, MDRD,<br>CKD-EPI                                     | Kinetic Jaffe<br>and IDMS<br>calibrated | Not<br>measured                   | <b>Total<br/>prevalence:<br/>39%</b>   | Low |
| Ephraim R <sup>21</sup>         | 2015,<br>Ghana,<br>West            | Tema<br>General<br>Hospital                                     | 194  | Patients with sickle cell<br>anemia                                 | Age (years): 23.25 ± 12.04<br>Male gender: 43.3%<br>SBP(mmHg): 110.06 ± 8.27<br>DBP(mmHg): 67.16 ± 8.23<br>BMI (kg/m <sup>2</sup> ): 18.85 ± 11.19 | (eGFR < 60<br>mL/min/ 1.73 m <sup>2</sup> or<br>evidence of kidney<br>damage as<br>albuminuria, or<br>overt proteinuria | Proteinuria by dipstick<br>and eGFR by CKD-EPI                   | IDMS                                    | 13.4%                             | <b>39.2%</b>                           | Low |
| van<br>Rensburg B <sup>27</sup> | 2010<br>South<br>Africa<br>South   | Tertiary<br>hospital                                            | 1216 | New patients referred to<br>the Renal Unit                          | Age (years): 39.6 ± 15.9<br>Male gender: 51.1%<br>Hypertension: 13.2%<br>DM: 10.8%                                                                 | Elevated SCr(>130<br>µmol/L) and small<br>kidneys on imaging<br>without evidence of<br>reversible causes                | Proteinuria by quantitative<br>assessment and Scr<br>measurement | Not<br>mentioned                        | 16.7%<br>proteinuria<br>>3.5 g/dl | <b>Total<br/>prevalence:<br/>37.9%</b> | Low |
| Hamdoug<br>M <sup>104</sup>     | 2011<br>Sudan                      | hairdressing<br>saloons                                         | 72   | Hairdressers                                                        | Age (years): 40±8<br>Male gender: 0%                                                                                                               | Scr level≥2 mg/dl                                                                                                       | Proteinuria by urinary<br>strip and 24 hrs                       | Not<br>mentioned                        | 26.4% had<br>albuminuri           | <b>Total<br/>prevalence:</b>           | Low |

1  
2  
3  
4  
5  
6  
7  
8  
9  
10  
11  
12  
13  
14  
15  
16  
17  
18  
19  
20  
21  
22  
23  
24  
25  
26  
27  
28  
29  
30  
31  
32  
33  
34  
35  
36  
37  
38  
39  
40  
41  
42  
43  
44  
45  
46  
47  
48  
49

|                           |                        |                                                                                                                         |    |                                                                                                                                       |                                                                           |                      |                                          |              |                                                     |                                                                  |     |
|---------------------------|------------------------|-------------------------------------------------------------------------------------------------------------------------|----|---------------------------------------------------------------------------------------------------------------------------------------|---------------------------------------------------------------------------|----------------------|------------------------------------------|--------------|-----------------------------------------------------|------------------------------------------------------------------|-----|
|                           | East                   |                                                                                                                         |    |                                                                                                                                       | Hypertension: 19.4%                                                       |                      | Scr measurement and renal biopsy         |              | a                                                   | <b>26.4%</b><br>14% had Scr $\geq 2$ mg/dl                       |     |
| EL-Safty I <sup>129</sup> | 2003<br>Egypt<br>North | male workers attending the out-patient clinic of the Health Insurance Organization of the Health Insurance Organization | 81 | Male workers attending the out-patient clinic of the Health Insurance Organization (29 non-silicotics, 24 silicotics and 28 referent) | Age (years): 39.83 $\pm$ 7.27<br>Male gender: 100%<br>Hypertension: 19.4% | Elevated proteinuria | Assessment of proteinuria quantitatively | Not measured | 93% among non-silica exposed<br>100% silica exposed | <b>Total prevalence (among those with Silica exposure): 100%</b> | Low |

DM: diabetes mellitus, BMI: body mass index, SBP: systolic blood pressure, DBP: diastolic blood pressure, IDMS: Isotope dilution mass spectrometry, MDRD: Modification of Diet in Renal Disease, CG: Cockcroft Gault ,

CKD-EPI: Chronic Kidney Disease Epidemiology Collaboration, IQR: inter-quartile range , KDOQI: Kidney Disease Outcome Quality Initiative

## Titles and legends

**Fig. 1** Flow diagram of the study selection

**Fig. 2** Prevalence of CKD among entire general population. Estimates from this figure should be presented with caution as it is bound to be imprecise and inaccurate due to its tentative way of estimation

**Fig. 3** Main causes of CKD

## Supporting information

**S1 Table:** Search strategy adopted in PubMed and Ovid MEDLINE

**S2 Table:** Studies among CKD patients

**Fig. S1:** The relation between the CKD prevalence with age and gender among general population and high risk groups (HIV, diabetics, and hypertensive)

## REFERENCES

1. Levey AS, Atkins R, Coresh J, et al. Chronic kidney disease as a global public health problem: approaches and initiatives - a position statement from Kidney Disease Improving Global Outcomes. *Kidney international* 2007;72(3):247-59. doi: 10.1038/sj.ki.5002343
2. Zoccali C, Kramer A, Jager KJ. Epidemiology of CKD in Europe: an uncertain scenario. *Nephrology dialysis transplantation* 2010;25(6):1731-33.
3. Global, regional, and national age–sex specific all-cause and cause-specific mortality for 240 causes of death, 1990–2013: a systematic analysis for the Global Burden of Disease Study 2013. *The Lancet* 2015;385(9963):117-71. doi: 10.1016/s0140-6736(14)61682-2
4. Bello AK, Peters J, Rigby J, et al. Socioeconomic status and chronic kidney disease at presentation to a renal service in the United Kingdom. *Clinical journal of the American Society of Nephrology : CJASN* 2008;3(5):1316-23. doi: 10.2215/cjn.00680208 [published Online First: 2008/06/27]
5. El Nahas AM, Bello AK. Chronic kidney disease: the global challenge. *The Lancet* 2005;365(9456):331-40.
6. UN. World Population Prospects: The 2015 Revision, Key Findings and Advance Tables: United Nations 2015 [Available from: [http://esa.un.org/unpd/wpp/publications/files/key\\_findings\\_wpp\\_2015.pdf](http://esa.un.org/unpd/wpp/publications/files/key_findings_wpp_2015.pdf) accessed November 8, 2015
7. Aikins Ad-G, Unwin N, Agyemang C, et al. Commentary Tackling Africa's chronic disease burden: from the local to the global. 2010
8. Organization WH. Global action plan for the prevention and control of noncommunicable diseases 2013-2020. 2013
9. Stanifer JW, Jing B, Tolan S, et al. The epidemiology of chronic kidney disease in sub-Saharan Africa: a systematic review and meta-analysis. *The Lancet Global Health* 2014;2(3):e174-81. doi: [http://dx.doi.org/10.1016/S2214-109X\(14\)70002-6](http://dx.doi.org/10.1016/S2214-109X(14)70002-6)
10. Anothaisintawee T, Rattanasiri S, Ingsathit A, et al. Prevalence of chronic kidney disease: a systematic review and meta-analysis. *Clinical nephrology* 2009;71(3):244-54.
11. Liberati A, Altman DG, Tetzlaff J, et al. The PRISMA statement for reporting systematic reviews and meta-analysis of studies that evaluate health care interventions: explanation and elaboration. *Italian Journal of Public Health* 2012;6(4)
12. Matsha TE, Yako YY, Rensburg MA, et al. Chronic kidney diseases in mixed ancestry south African populations: prevalence, determinants and concordance between kidney function estimators. *BMC nephrology* 2013;14:75. doi: <http://dx.doi.org/10.1186/1471-2369-14-75>
13. Eastwood JB, Kerry SM, Plange-Rhule J, et al. Assessment of GFR by four methods in adults in Ashanti, Ghana: the need for an eGFR equation for lean African populations.[Erratum appears in *Nephrol Dial Transplant*. 2011 Dec;26(12):4153 Note: Emmett, Lynsey [added]; Miller, Michelle A [added]]. *Nephrology Dialysis Transplantation* 2010;25(7):2178-87. doi: <http://dx.doi.org/10.1093/ndt/gfp765>
14. Glaser N, Deckert A, Phiri S, et al. Comparison of Various Equations for Estimating GFR in Malawi: How to Determine Renal Function in Resource Limited Settings? *PloS one* 2015;10(6):e0130453. doi: 10.1371/journal.pone.0130453 [published Online First: 2015/06/18]
15. Juni P, Altman DG, Egger M. Systematic reviews in health care: Assessing the quality of controlled clinical trials. *BMJ (Clinical research ed)* 2001;323(7303):42-6. [published Online First: 2001/07/07]
16. Whiting P, Rutjes AW, Reitsma JB, et al. The development of QUADAS: a tool for the quality assessment of studies of diagnostic accuracy included in systematic reviews. *BMC medical research methodology* 2003;3:25. doi: 10.1186/1471-2288-3-25 [published Online First: 2003/11/11]
17. Shamliyan T, Kane RL, Dickinson S. A systematic review of tools used to assess the quality of observational studies that examine incidence or prevalence and risk factors for diseases. *J Clin Epidemiol* 2010;63(10):1061-70. doi: 10.1016/j.jclinepi.2010.04.014 [published Online First: 2010/08/24]
18. Cohen J. A Coefficient of Agreement for Nominal Scales. *Educational and Psychological Measurement* 1960;20(1):37-46. doi: 10.1177/001316446002000104
19. Ka EF, Cisse MM, Lemrabott AT, et al. [Lupus nephropathy in black patients with systemic lupus erythematosus in Senegal: 43 cases]. *Medecine et sante tropicales* 2013;23(3):328-31. doi: 10.1684/mst.2013.0200 [published Online First: 2013/10/29]
20. Desein PH, Hsu HC, Tsang L, et al. Kidney function, endothelial activation and atherosclerosis in black and white Africans with rheumatoid arthritis. *PloS one* 2015;10(3):e0121693. doi: 10.1371/journal.pone.0121693 [published Online First: 2015/03/26]
21. Ephraim RK, Osakunor DN, Cudjoe O, et al. Chronic kidney disease is common in sickle cell disease: a cross-

- sectional study in the Tema Metropolis, Ghana. *BMC nephrology* 2015;16:75. doi: 10.1186/s12882-015-0072-y [published Online First: 2015/05/30]
22. Ghahramani N. Silica nephropathy. *The international journal of occupational and environmental medicine* 2010;1(3 July)
23. Sampathkumar K, Yesudas S. Hair dye poisoning and the developing world. *Journal of emergencies, trauma and shock* 2009;2(2):129.
24. Elsharif ME, Abdullha SM, Abdalla SM, et al. The magnitude of chronic kidney diseases among primary health care attendees in Gezira state, Sudan. *Saudi journal of kidney diseases and transplantation : an official publication of the Saudi Center for Organ Transplantation, Saudi Arabia* 2013;24(4):807-9. [published Online First: 2013/07/03]
25. Sumaili EK, Cohen EP, Zinga CV, et al. High prevalence of undiagnosed chronic kidney disease among at-risk population in Kinshasa, the Democratic Republic of Congo. *BMC nephrology* 2009;10:18. doi: 10.1186/1471-2369-10-18 [published Online First: 2009/07/23]
26. Afolabi MO, Abioye-Kuteyi E, Arogundade FA, et al. Prevalence of chronic kidney disease in a Nigerian family practice population. *South African Family Practice* 2009;51(2):132-37.
27. van Rensburg BW, van Staden AM, Rossouw GJ, et al. The profile of adult nephrology patients admitted to the Renal Unit of the Universitas Tertiary Hospital in Bloemfontein, South Africa from 1997 to 2006. *Nephrology Dialysis Transplantation* 2010;25(3):820-4. doi: <http://dx.doi.org/10.1093/ndt/gfp535>
28. Raji Y, Mabayoje O, Bello T. Familial clustering of risk factors for cardiovascular disease among first-degree relatives of patients with chronic kidney disease in a sub-Saharan African population. *Cardiovascular journal of Africa* 2015;26(2 Suppl 1):S11-4. doi: 10.5830/cvja-2015-041 [published Online First: 2015/05/13]
29. The unrecognized prevalence of chronic kidney disease among family members of end stage renal disease patients [IEA-EEF abstract 264]; 2009. *European Journal of Epidemiology*.
30. Anyabolu EN, Chukwuonye, II, Anyabolu AE, et al. A look at risk factors of proteinuria in subjects without impaired renal filtration function in a general population in Owerri, Nigeria. *The Pan African medical journal* 2016;23:257. doi: 10.11604/pamj.2016.23.257.8189 [published Online First: 2016/08/16]
31. El Khayat SS, Hallal K, Gharbi MB, et al. Fate of patients during the first year of dialysis. *Saudi journal of kidney diseases and transplantation : an official publication of the Saudi Center for Organ Transplantation, Saudi Arabia* 2013;24(3):605-9. [published Online First: 2013/05/04]
32. Seck SM, Diallo IM, Diagne SI. Epidemiological patterns of chronic kidney disease in black African elders: a retrospective study in West Africa. *Saudi Journal of Kidney Diseases & Transplantation* 2013;24(5):1068-72.
33. Seck SM, Elhadj FK, Fall S, et al. [Adherence to therapy in sub-Saharan non-dialysed patients with chronic kidney diseases]. *Nephrologie et Therapeutique* 2008;4(5):325-9. doi: <http://dx.doi.org/10.1016/j.nephro.2008.02.004>
34. Bourquia A. [Autosomal dominant polycystic kidney disease (ADPKD). in Morocco. Multicenter study about 308 families]. *Nephrologie* 2002;23(2):93-6. [published Online First: 2002/05/16]
35. Ouattara B, Kra O, Yao H, et al. [Characteristics of chronic renal failure in black adult patients hospitalized in the Internal Medicine department of Treichville University Hospital]. *Nephrologie et Therapeutique* 2011;7(7):531-4. doi: <http://dx.doi.org/10.1016/j.nephro.2011.03.009>
36. Lengani A, Coulibaly G, Laville M, et al. [Epidemiology of severe chronic renal insufficiency in Burkina Faso]. *Sante (Montrouge, France)* 1997;7(6):379-83. [published Online First: 1998/03/21]
37. Afifi AM, Mady GE, Ahmad AA, et al. Pattern of renal diseases among elderly Egyptians patients with acute or chronic renal diseases in Ain Shams University and Nasser Institute Hospitals, Cairo, Egypt. *Journal of the Egyptian Society of Parasitology* 2005;35(3):911-24. [published Online First: 2005/12/13]
38. Diouf B, Ka EF, Niang A, et al. [Etiologies of chronic renal insufficiency in a adult internal medicine service in Dakar]. *Dakar medical* 2000;45(1):62-5. [published Online First: 2003/12/12]
39. Niang A, Dial C, Ka EF, et al. [Nephrotic syndrom with focal and segmental glomerulosclerosis in Dakar: epidemiological and clinicopathological characteristics (about 134 cases)]. *Dakar medical* 2008;53(1):45-51. [published Online First: 2008/12/24]
40. Sabi KA, Gnionsahe DA, Amedegnato D. [Chronic kidney failure in Togo: clinical, laboratory, and etiological aspects]. *Medecine tropicale : revue du Corps de sante colonial* 2011;71(1):74-6. [published Online First: 2011/05/19]
41. Ulasi II, Ijoma CK. The enormity of chronic kidney disease in Nigeria: the situation in a teaching hospital in South-East Nigeria. *Journal of tropical medicine* 2010;2010
42. Abderrahim E, Zouaghi K, Hedri H, et al. Renal replacement therapy for diabetic end-stage renal disease. Experience of a Tunisian hospital centre. *Diabetes & metabolism* 2001;27(5 Pt 1):584-90.
43. Abdou N, Boucar D, El Hadj Fary KA, et al. Histopathological profiles of nephropathies in senegal. *Saudi journal of kidney diseases and transplantation : an official publication of the Saudi Center for Organ Transplantation, Saudi Arabia* 2003;14(2):212-4. [published Online First: 2008/01/23]
44. Afifi A, El Setouhy M, El Sharkawy M, et al. Diabetic nephropathy as a cause of end-stage renal disease in Egypt: a six-year study. *Eastern Mediterranean health journal = La revue de sante de la Mediterranee orientale = al-Majallah al-sihhiyah li-sharq al-mutawassit* 2004;10(4-5):620-6. [published Online First: 2005/12/13]
45. Afifi A, Karim MA. Renal replacement therapy in Egypt: first annual report of the Egyptian Society of Nephrology,

1996. *Eastern Mediterranean health journal = La revue de sante de la Mediterranee orientale = al-Majallah al-sihhiyah li-sharq al-mutawassit* 1999;5(5):1023-9. [published Online First: 2000/09/13]
46. Agaba EI, Wigwe CM, Agaba PA, et al. Performance of the Cockcroft-Gault and MDRD equations in adult Nigerians with chronic kidney disease. *International urology and nephrology* 2009;41(3):635-42. doi: 10.1007/s11255-008-9515-8 [published Online First: 2009/01/13]
47. Alashek WA, McIntyre CW, Taal MW. Epidemiology and aetiology of dialysis-treated end-stage kidney disease in Libya. *BMC nephrology* 2012;13:33. doi: 10.1186/1471-2369-13-33 [published Online First: 2012/06/12]
48. Alasia DD, Emem-Chioma P, Wokoma FS. A single-center 7-year experience with end-stage renal disease care in Nigeria-a surrogate for the poor state of ESRD care in Nigeria and other sub-saharan african countries: advocacy for a global fund for ESRD care program in sub-saharan african countries. *Int J Nephrol* 2012;2012:639653. doi: <http://dx.doi.org/10.1155/2012/639653>
49. Alebiosu CO, Ayodele OO, Abbas A, et al. Chronic renal failure at the Olabisi Onabanjo University Teaching Hospital, Sagamu, Nigeria. *African health sciences* 2006;6(3):132-8. doi: 10.5555/afhs.2006.6.3.132 [published Online First: 2006/12/05]
50. Amira CO, Braimoh RW, Bello BT. Pattern of intradialytic complications at the Lagos University Teaching Hospital. *African journal of medicine and medical sciences* 2012;41(4):411-6. [published Online First: 2013/05/16]
51. Arogundade FA, Sanusi AA, Hassan MO, et al. The pattern, clinical characteristics and outcome of ESRD in Ile-Ife, Nigeria: is there a change in trend? *African health sciences* 2011;11(4):594-601. [published Online First: 2012/06/01]
52. Counil E, Cherni N, Kharrat M, et al. Trends of incident dialysis patients in Tunisia between 1992 and 2001. *American journal of kidney diseases : the official journal of the National Kidney Foundation* 2008;51(3):463-70. doi: 10.1053/j.ajkd.2007.10.032 [published Online First: 2008/02/26]
53. Chijioko A, Makusidi AM, Kolo PM. Electrocardiographic abnormalities among dialysis naive chronic kidney disease patients in Ilorin Nigeria. *Annals of African medicine* 2012;11(1):21-6. doi: 10.4103/1596-3519.91011 [published Online First: 2011/12/27]
54. Madala ND, Thusi GP, Assounga AG, et al. Characteristics of South African patients presenting with kidney disease in rural KwaZulu-Natal: a cross sectional study. *BMC nephrology* 2014;15:61. doi: <http://dx.doi.org/10.1186/1471-2369-15-61>
55. Okpechi IG, Ayodele OE, Rayner BL, et al. Kidney disease in elderly South Africans. *Clinical nephrology* 2013;79(4):269-76. doi: <http://dx.doi.org/10.5414/CN107746>
56. Laleye A, Awede B, Agboton B, et al. Autosomal dominant polycystic kidney disease in University Clinic of Nephrology and Haemodialysis of Cotonou: clinical and genetical findings. *Genetic Counseling* 2012;23(4):435-45.
57. Okunola Y, Ayodele O, Akinwusi P, et al. Haemodialysis practice in a resource-limited setting in the tropics. *Ghana medical journal* 2013;47(1):4-9. [published Online First: 2013/05/11]
58. Bello BT, Raji YR, Sanusi I, et al. Challenges of providing maintenance hemodialysis in a resource poor country: Experience from a single teaching hospital in Lagos, Southwest Nigeria. *Hemodialysis international International Symposium on Home Hemodialysis* 2013;17(3):427-33. doi: 10.1111/hdi.12024 [published Online First: 2013/02/05]
59. El Minshawy O. End-stage renal disease in the El-Minia Governorate, upper Egypt: an epidemiological study. *Saudi journal of kidney diseases and transplantation : an official publication of the Saudi Center for Organ Transplantation, Saudi Arabia* 2011;22(5):1048-54. [published Online First: 2011/09/14]
60. Okpechi IG, Rayner BL, Swanepoel CR. Nephrotic syndrome in adult black South Africans: HIV-associated nephropathy as the main culprit. *Journal of the National Medical Association* 2010;102(12):1193-7.
61. Madala ND, Nkwanyana N, Dubula T, et al. Predictive performance of eGFR equations in South Africans of African and Indian ancestry compared with 99mTc-DTPA imaging. *International Urology & Nephrology* 2012;44(3):847-55. doi: <http://dx.doi.org/10.1007/s11255-011-9928-7>
62. El Farouki MR, Bahadi A, Hamzi MA, et al. [Profile of chronic renal failure in diabetes at initiation of hemodialysis in the nephrology and dialysis service of the military hospital in Rabat, Morocco]. *The Pan African medical journal* 2013;15:124. doi: 10.11604/pamj.2013.15.124.2252 [published Online First: 2013/11/21]
63. Okpechi I, Swanepoel C, Duffield M, et al. Patterns of renal disease in Cape Town South Africa: a 10-year review of a single-centre renal biopsy database. *Nephrology Dialysis Transplantation* 2011;26(6):1853-61. doi: <http://dx.doi.org/10.1093/ndt/gfq655>
64. Niang A, Cisse MM, Mahmoud SM, et al. Pilot experience in senegal with peritoneal dialysis for end-stage renal disease. *Peritoneal Dialysis International* 2014;34(5):539-43. doi: <http://dx.doi.org/10.3747/pdi.2011.00327>
65. Buargub MA. 5-year mortality in hemodialysis patients: a single center study in Tripoli. *Saudi journal of kidney diseases and transplantation : an official publication of the Saudi Center for Organ Transplantation, Saudi Arabia* 2008;19(2):268-73. [published Online First: 2008/03/04]
66. Chijioko A, Aderibigbe A, Olarenwaju TO, et al. Prevalence and pattern of cystic kidney diseases in Ilorin, Nigeria. *Saudi journal of kidney diseases and transplantation : an official publication of the Saudi Center for Organ Transplantation, Saudi Arabia* 2010;21(6):1172-8. [published Online First: 2010/11/10]

- 1  
2  
3  
4  
5  
6  
7  
8  
9  
10  
11  
12  
13  
14  
15  
16  
17  
18  
19  
20  
21  
22  
23  
24  
25  
26  
27  
28  
29  
30  
31  
32  
33  
34  
35  
36  
37  
38  
39  
40  
41  
42  
43  
44  
45  
46  
47  
48  
49  
50  
51  
52  
53  
54  
55  
56  
57  
58  
59  
60
67. Elsharif ME, Elsharif EG. Causes of end-stage renal disease in Sudan: a single-center experience. *Saudi journal of kidney diseases and transplantation : an official publication of the Saudi Center for Organ Transplantation, Saudi Arabia* 2011;22(2):373-6. [published Online First: 2011/03/23]
68. Elkhatib M, Elnahed MS, Fadda S, et al. The change in the spectrum of glomerulonephritis in Egypt over the past decade. *Saudi journal of kidney diseases and transplantation : an official publication of the Saudi Center for Organ Transplantation, Saudi Arabia* 2012;23(5):1065-7. doi: 10.4103/1319-2442.100955 [published Online First: 2012/09/18]
69. Ibrahim S, Fayed A, Fadda S, et al. A five-year analysis of the incidence of glomerulonephritis at Cairo University Hospital-Egypt. *Saudi journal of kidney diseases and transplantation : an official publication of the Saudi Center for Organ Transplantation, Saudi Arabia* 2012;23(4):866-70. doi: 10.4103/1319-2442.98191 [published Online First: 2012/07/19]
70. Ayach G, El-Filali H, Saidi S, et al. Histopathological study of pure primary nephrotic syndrome in adolescents and young Moroccan adults. *Arab journal of nephrology and transplantation* 2011;4(3):137-40. [published Online First: 2011/10/27]
71. Ramilitiana B, Ranivoharisoa EM, Dodo M, et al. [A retrospective study on the incidence of chronic renal failure in the Department of Internal Medicine and Nephrology at University Hospital of Antananarivo (the capital city of Madagascar)]. *The Pan African medical journal* 2016;23:141. doi: 10.11604/pamj.2016.23.141.8874 [published Online First: 2016/06/10]
72. Zajjari Y, Benyahia M, Ibrahim DM, et al. La néphropathie non diabétique chez les patients diabétiques de type 2 à l'hôpital militaire Mohammed V de Rabat (Maroc). *EMHJ* 2012;18(6)
73. Fatiu A, Abubakr S, Muzamil H, et al. Undiagnosed hypertension and proteinuria in a market population in Ile-Ife, Nigeria. *Arab journal of nephrology and transplantation* 2011;4(3):141-6. [published Online First: 2011/10/27]
74. Traore M, Traore HA, Kardorff R, et al. The public health significance of urinary schistosomiasis as a cause of morbidity in two districts in Mali. *The American journal of tropical medicine and hygiene* 1998;59(3):407-13. [published Online First: 1998/09/28]
75. Sumaili EK, Nseka NM, Lepira FB, et al. Screening for proteinuria and chronic kidney disease risk factors in Kinshasa: a World Kidney Day 2007 study. *Nephron Clinical practice* 2008;110(4):c220-8. doi: 10.1159/000167869 [published Online First: 2008/11/01]
76. Egbi OG, Okafor UH, Miebodei KE, et al. Prevalence and correlates of chronic kidney disease among civil servants in Bayelsa state, Nigeria. *Nigerian journal of clinical practice* 2014;17(5):602-7. doi: <http://dx.doi.org/10.4103/1119-3077.141426>
77. Ayodele OE, Okunola OO, Afolabi MO, et al. Prevalence of hypertension, diabetes and chronic kidney disease in participants of the 2009 World Kidney Day screening exercise in Southwest Nigeria. *Hong Kong Journal of Nephrology* 2011;13(2):55-63.
78. Abu-Aisha H, Elhassan A, Khamis A, et al. Chronic kidney disease in police forces households in Khartoum, Sudan: pilot report. *Arab journal of nephrology and transplantation* 2009;2(2):21-26.
79. Cailhol J, Nkurunziza B, Izzedine H, et al. Prevalence of chronic kidney disease among people living with HIV/AIDS in Burundi: a cross-sectional study. *BMC nephrology* 2011;12:40. doi: <http://dx.doi.org/10.1186/1471-2369-12-40>
80. Wools-Kaloustian K, Gupta SK, Muloma E, et al. Renal disease in an antiretroviral-naïve HIV-infected outpatient population in Western Kenya. *Nephrology Dialysis Transplantation* 2007;22(8):2208-12.
81. Emem CP, Arogundade F, Sanusi A, et al. Renal disease in HIV-seropositive patients in Nigeria: an assessment of prevalence, clinical features and risk factors. *Nephrology, dialysis, transplantation : official publication of the European Dialysis and Transplant Association - European Renal Association* 2008;23(2):741-6. doi: 10.1093/ndt/gfm836 [published Online First: 2007/12/11]
82. Wyatt CM, Shi Q, Novak JE, et al. Prevalence of kidney disease in HIV-infected and uninfected Rwandan women. *PLoS ONE [Electronic Resource]* 2011;6(3):e18352. doi: <http://dx.doi.org/10.1371/journal.pone.0018352>
83. FoleackKaze F, Kengne AP, Pefura Yone EW, et al. Renal function, urinalysis abnormalities and correlates among HIV-infected Cameroonians naïve to antiretroviral therapy. *Saudi Journal of Kidney Diseases & Transplantation* 2013;24(6):1291-7. doi: <http://dx.doi.org/10.4103/1319-2442.121280>
84. Struik GM, den Exter RA, Munthali C, et al. The prevalence of renal impairment among adults with early HIV disease in Blantyre, Malawi. *International journal of STD & AIDS* 2011;22(8):457-62. doi: 10.1258/ijsa.2011.010521 [published Online First: 2011/07/29]
85. Msango L, Downs JA, Kalluvya SE, et al. Renal dysfunction among HIV-infected patients starting antiretroviral therapy. *AIDS (London, England)* 2011;25(11):1421-5. doi: <http://dx.doi.org/10.1097/QAD.0b013e328348a4b1>
86. Janmohamed MN, Kalluvya SE, Mueller A, et al. Prevalence of chronic kidney disease in diabetic adult out-patients in Tanzania. *BMC nephrology* 2013;14(1):183.
87. Wanjohi FW, Otieno FC, Ogola EN, et al. Nephropathy in patients with recently diagnosed type 2 diabetes mellitus in black Africans. *East African medical journal* 2002;79(8):399-404. [published Online First: 2003/03/18]
88. Choukem SP, Dzudie A, Dehayem M, et al. Comparison of different blood pressure indices for the prediction of



- prevalent diabetic nephropathy in a sub-Saharan African population with type 2 diabetes. *The Pan African medical journal* 2012;11:67. [published Online First: 2012/06/02]
89. Plange-Rhule J, Phillips R, Acheampong JW, et al. Hypertension and renal failure in Kumasi, Ghana. *Journal of human hypertension* 1999;13(1):37-40.
90. Kalyesubula R, Nankabirwa JI, Ssinabulya I, et al. Kidney disease in Uganda: a community based study. *BMC nephrology* 2017;18(1):116. doi: 10.1186/s12882-017-0521-x [published Online First: 2017/04/05]
91. Kaze FF, Halle MP, Mopa HT, et al. Prevalence and risk factors of chronic kidney disease in urban adult Cameroonians according to three common estimators of the glomerular filtration rate: a cross-sectional study. *BMC nephrology* 2015;16:96. doi: 10.1186/s12882-015-0102-9 [published Online First: 2015/07/08]
92. Lunyera J, Stanifer JW, Ingabire P, et al. Prevalence and correlates of proteinuria in Kampala, Uganda: a cross-sectional pilot study. *BMC research notes* 2016;9:97. doi: 10.1186/s13104-016-1897-6 [published Online First: 2016/02/18]
93. Wachukwu CM, Emem-Chioma PC, Wokoma FS, et al. Prevalence of risk factors for chronic kidney disease among adults in a university community in southern Nigeria. *The Pan African medical journal* 2015;21:120. doi: 10.11604/pamj.2015.21.120.7079 [published Online First: 2015/09/04]
94. Odongo P, Wanyama R, Obol JH, et al. Impaired renal function and associated risk factors in newly diagnosed HIV-infected adults in Gulu Hospital, Northern Uganda. *BMC nephrology* 2015;16:43. doi: 10.1186/s12882-015-0035-3 [published Online First: 2015/04/17]
95. Feteh VF, Choukem SP, Kengne AP, et al. Anemia in type 2 diabetic patients and correlation with kidney function in a tertiary care sub-Saharan African hospital: a cross-sectional study. *BMC nephrology* 2016;17:29. doi: 10.1186/s12882-016-0247-1 [published Online First: 2016/03/21]
96. Pillay S, Aldous C, Mahomed F. A deadly combination - HIV and diabetes mellitus: Where are we now? *South African medical journal = Suid-Afrikaanse tydskrif vir geneeskunde* 2016;106(4):54. doi: 10.7196/SAMJ.2016.v106i4.9950 [published Online First: 2016/04/02]
97. Seck SM, Doupa D, Gueye L, et al. Chronic kidney disease epidemiology in northern Senegal: a cross-sectional study. *Iranian journal of kidney diseases* 2014;8(4):286-91.
98. Sumaili EK, Krzesinski JM, Zinga CV, et al. Prevalence of chronic kidney disease in Kinshasa: results of a pilot study from the Democratic Republic of Congo. *Nephrology Dialysis Transplantation* 2009;24(1):117-22. doi: <http://dx.doi.org/10.1093/ndt/gfn469>
99. Longo AL, Lepira FB, Sumaili EK, et al. Prevalence of low estimated glomerular filtration rate, proteinuria, and associated risk factors among HIV-infected black patients using Cockcroft-Gault and modification of diet in renal disease study equations. *Journal of Acquired Immune Deficiency Syndromes: JAIDS* 2012;59(1):59-64. doi: <http://dx.doi.org/10.1097/QAI.0b013e31823587b0>
100. Fana GT, Ndhlovu CE. Renal dysfunction among anti-retroviral therapy naive HIV infected patients in Zimbabwe. *The Central African journal of medicine* 2011;57(1-4):1-5. [published Online First: 2011/01/01]
101. Han TM, Naicker S, Ramdial PK, et al. A cross-sectional study of HIV-seropositive patients with varying degrees of proteinuria in South Africa. *Kidney international* 2006;69(12):2243-50.
102. Balogun WO, Abbiyesuku FM. Excess renal insufficiency among type 2 diabetic patients with dip-stick positive proteinuria in a tertiary hospital. *African journal of medicine and medical sciences* 2011;40(4):399-403. [published Online First: 2012/07/13]
103. Mafundikwa A, Ndhlovu CE, Gomo Z. The prevalence of diabetic nephropathy in adult patients with insulin dependent diabetes mellitus attending Parirenyatwa Diabetic Clinic, Harare. *The Central African journal of medicine* 2007;53(1-4):1-6. [published Online First: 2007/01/01]
104. Hamdouk M, Abdelraheem M, Taha A, et al. The association between prolonged occupational exposure to paraphenylenediamine (hair-dye) and renal impairment. *Arab journal of nephrology and transplantation* 2011;4(1):21-5. [published Online First: 2011/04/08]
105. Oluyombo R, Ayodele OE, Akinwusi PO, et al. A community study of the prevalence, risk factors and pattern of chronic kidney disease in osun state, South west Nigeria. *West African journal of medicine* 2013;32(2):85-92.
106. Prevalence of Chronic Kidney Disease and Associated Risk Factors: First Results from a Population Based Screening Program in Morocco(MAREMAR) [ASN abstract 353]; 2012. *J Am Soc Nephrol*.
107. Masimango MI, Sumaili EK, Jadoul M, et al. Prevalence of microalbuminuria and diagnostic value of dipstick proteinuria in outpatients from HIV clinics in Bukavu, the Democratic Republic of Congo. *BMC nephrology* 2014;15(1):146. doi: 10.1186/1471-2369-15-146 [published Online First: 2014/09/06]
108. Fabian J, Naicker S, Venter WD, et al. Urinary screening abnormalities in antiretroviral-naive HIV-infected outpatients and implications for management--a single-center study in South Africa. *Ethnicity & disease* 2009;19(1 Suppl 1):S1-80-5.
109. Sarfo FS, Keegan R, Appiah L, et al. High prevalence of renal dysfunction and association with risk of death amongst HIV-infected Ghanaians. *The Journal of infection* 2013;67(1):43-50. doi: 10.1016/j.jinf.2013.03.008 [published Online First: 2013/04/02]
110. Jao J, Palmer D, Leus I, et al. Prevalence and predictors of proteinuria in HIV-infected and uninfected pregnant women in Cameroon. *Nephrology, dialysis, transplantation : official publication of the European Dialysis and Transplant Association - European Renal Association* 2011;26(9):3051-3. doi: 10.1093/ndt/gfr310 [published

- Online First: 2011/07/02]
111. Makulo Jr R, Nseka MN, Jadoul M, et al. Albuminurie pathologique lors du dépistage du diabète en milieu semi-rural (cité de Kisantu en RD Congo). *Nephrologie & thérapeutique* 2010;6(6):513-19.
  112. Kaze FF, Kengne AP, Magatsing CT, et al. Prevalence and Determinants of Chronic Kidney Disease Among Hypertensive Cameroonians According to Three Common Estimators of the Glomerular Filtration Rate. *Journal of clinical hypertension (Greenwich, Conn)* 2016;18(5):408-14. doi: 10.1111/jch.12781 [published Online First: 2016/01/23]
  113. Ayokunle DS, Olusegun OT, Ademola A, et al. Prevalence of chronic kidney disease in newly diagnosed patients with Human immunodeficiency virus in Ilorin, Nigeria. *Jornal brasileiro de nefrologia : 'orgao oficial de Sociedades Brasileira e Latino-Americana de Nefrologia* 2015;37(2):177-84. doi: 10.5935/0101-2800.20150029 [published Online First: 2015/07/15]
  114. Chadwick DR, Sarfo FS, Kirk ES, et al. Tenofovir is associated with increased tubular proteinuria and asymptomatic renal tubular dysfunction in Ghana. *BMC nephrology* 2015;16:195. doi: 10.1186/s12882-015-0192-4 [published Online First: 2015/12/03]
  115. Glaser N, Phiri S, Bruckner T, et al. The prevalence of renal impairment in individuals seeking HIV testing in Urban Malawi. *BMC nephrology* 2016;17(1):186. doi: 10.1186/s12882-016-0403-7 [published Online First: 2016/11/24]
  116. Pruijm MT, Madeleine G, Riesen WF, et al. Prevalence of microalbuminuria in the general population of Seychelles and strong association with diabetes and hypertension independent of renal markers. *Journal of hypertension* 2008;26(5):871-7. doi: <http://dx.doi.org/10.1097/HJH.0b013e3282f624d9>
  117. Gouda Z, Mashaal G, Bello A, et al. Egypt information, prevention, and treatment of chronic kidney disease (EGIPT-CKD) programme: Prevalence and risk factors for microalbuminuria among the relatives of patients with CKD in Egypt. *Saudi Journal of Kidney Diseases and Transplantation* 2011;22(5):1055.
  118. Attolou V, Bigot A, Ayivi B, et al. [Renal complications associated with human acquired immunodeficiency virus infection in a population of hospital patients at the Hospital and University National Center in Cotonou]. *Sante (Montrouge, France)* 1998;8(4):283-6. [published Online First: 1998/10/30]
  119. Bouzid C, Smida H, Kacem A, et al. [Renal failure in Tunisian patients with type 2 diabetes: frequency and related factors]. *La Tunisie medicale* 2011;89(1):10-5. [published Online First: 2011/01/27]
  120. Keeton GR, Smit R, Bryer A. Renal outcome of type 2 diabetes in South Africa--a 12-year follow-up study. *South African Medical Journal* 2004;94(9):771-5.
  121. Bouaziz A, Zidi I, Zidi N, et al. Nephropathy following type 2 diabetes mellitus in Tunisian population. *The West Indian medical journal* 2012;61(9):881-9. [published Online First: 2013/09/12]
  122. Katchunga P, Hermans MP, Manwa B, et al. [Hypertension, insulin resistance and chronic kidney disease in type 2 diabetes patients from South Kivu, DR Congo]. *Nephrologie et Therapeutique* 2010;6(6):520-5. doi: <http://dx.doi.org/10.1016/j.nephro.2010.04.002>
  123. Djrolo F, Attolou VG, Avode DG, et al. [Diabetic nephropathy: an epidemiological study based on proteinuria in a population of black African diabetics in Cotonou, Benin]. *Sante (Montrouge, France)* 2001;11(2):105-9.
  124. Lutale JJ, Thordarson H, Abbas ZG, et al. Microalbuminuria among type 1 and type 2 diabetic patients of African origin in Dar Es Salaam, Tanzania. *BMC nephrology* 2007;8(1):2.
  125. Gill G, Gebrekidan A, English P, et al. Diabetic complications and glycaemic control in remote North Africa. *QJM : monthly journal of the Association of Physicians* 2008;101(10):793-98.
  126. Osafo C, Mate-Kole M, Affram K, et al. Prevalence of chronic kidney disease in hypertensive patients in Ghana. *Renal failure* 2011;33(4):388-92. doi: <http://dx.doi.org/10.3109/0886022X.2011.565140>
  127. Lengani A, Samadoulougou A, Cisse M. [Characteristics of renal disease in hypertensive morbidities in adults in Burkina Faso]. *Archives des maladies du coeur et des vaisseaux* 2000;93(8):1053-7.
  128. Rayner B, Becker P. The prevalence of microalbuminuria and ECG left ventricular hypertrophy in hypertensive patients in private practices in South Africa. *Cardiovascular Journal of Southern Africa* 2006;17(5):245-9.
  129. IA EL-S, Gadallah M, Shouman AE, et al. Subclinical nephrotoxicity caused by smoking and occupational silica exposure among Egyptian industrial workers. *Archives of medical research* 2003;34(5):415-21. doi: 10.1016/s0188-4409(03)00077-8 [published Online First: 2003/11/07]
  130. Laurence EC, Volmink J, Esterhuizen TM, et al. Risk of cardiovascular disease among teachers in Cape Town: Findings of the South African PaCT pilot study. *South African medical journal = Suid-Afrikaanse tydskrif vir geneeskunde* 2016;106(10):996-1001. doi: 10.7196/SAMJ.2016.v106i10.10869 [published Online First: 2016/10/12]
  131. Mogueo A, Echouffo-Tcheugui JB, Matsha TE, et al. Validation of two prediction models of undiagnosed chronic kidney disease in mixed-ancestry South Africans. *BMC nephrology* 2015;16:94. doi: 10.1186/s12882-015-0093-6 [published Online First: 2015/07/05]
  132. Stanifer JW, Egger JR, Turner EL, et al. Neighborhood clustering of non-communicable diseases: results from a community-based study in Northern Tanzania. *BMC public health* 2016;16:226. doi: 10.1186/s12889-016-2912-5 [published Online First: 2016/03/06]
  133. Stanifer JW, Maro V, Egger J, et al. The epidemiology of chronic kidney disease in Northern Tanzania: a population-based survey. *PloS one* 2015;10(4):e0124506. doi: 10.1371/journal.pone.0124506 [published

- Online First: 2015/04/18]
134. Stanifer JW, Turner EL, Egger JR, et al. Knowledge, Attitudes, and Practices Associated with Chronic Kidney Disease in Northern Tanzania: A Community-Based Study. *PloS one* 2016;11(6):e0156336. doi: 10.1371/journal.pone.0156336 [published Online First: 2016/06/10]
  135. Anyabolu EN, Chukwuonye, II, Arodiwe E, et al. Prevalence and predictors of chronic kidney disease in newly diagnosed human immunodeficiency virus patients in Owerri, Nigeria. *Indian journal of nephrology* 2016;26(1):10-5. doi: 10.4103/0971-4065.156115 [published Online First: 2016/03/05]
  136. Okafor UH, Unuigbo EI, Chukwuonye E. Prevalence and clinical and laboratory characteristics of kidney disease in anti-retroviral-naive human immunodeficiency virus-infected patients in South-South Nigeria. *Saudi journal of kidney diseases and transplantation : an official publication of the Saudi Center for Organ Transplantation, Saudi Arabia* 2016;27(1):129-34. doi: 10.4103/1319-2442.174155 [published Online First: 2016/01/21]
  137. Wensink GE, Schoffelen AF, Tempelman HA, et al. Albuminuria Is Associated with Traditional Cardiovascular Risk Factors and Viral Load in HIV-Infected Patients in Rural South Africa. *PloS one* 2015;10(8):e0136529. doi: 10.1371/journal.pone.0136529 [published Online First: 2015/08/27]
  138. Eghan BA, Jr., Frempong MT, Adjei-Poku M. Prevalence and predictors of microalbuminuria in patients with diabetes mellitus: a cross-sectional observational study in Kumasi, Ghana. *Ethnicity & disease* 2007;17(4):726-30. [published Online First: 2007/12/13]
  139. Aryee C, Owiredo WK, Osei-Yeboah J, et al. An Analysis of Anthropometric Indicators and Modifiable Lifestyle Parameters Associated with Hypertensive Nephropathy. *International journal of hypertension* 2016;2016:6598921. doi: 10.1155/2016/6598921 [published Online First: 2016/10/25]
  140. Nabbaale J, Kibirige D, Ssekasanvu E, et al. Microalbuminuria and left ventricular hypertrophy among newly diagnosed black African hypertensive patients: a cross sectional study from a tertiary hospital in Uganda. *BMC research notes* 2015;8:198. doi: 10.1186/s13104-015-1156-2 [published Online First: 2015/05/15]
  141. Addo J, Smeeth L, Leon DA. Hypertensive target organ damage in Ghanaian civil servants with hypertension. *PloS one* 2009;4(8):e6672. doi: 10.1371/journal.pone.0006672 [published Online First: 2009/08/25]
  142. Owiredo WK, Quaye L, Amidu N, et al. Renal insufficiency in Ghanaian HIV infected patients: need for dose adjustment. *African health sciences* 2013;13(1):101-11. doi: <http://dx.doi.org/10.4314/ahs.v13i1.14>
  143. Stöhr W, Reid A, Walker AS, et al. Glomerular dysfunction and associated risk factors over 4-5 years following antiretroviral therapy initiation in Africa. *Antiviral therapy* 2011;16(7):1011-20. doi: <http://dx.doi.org/10.3851/IMP1832>
  144. Stöhr W, Walker AS, Munderi P, et al. Estimating glomerular filtration rate in HIV-infected adults in Africa: comparison of Cockcroft-Gault and Modification of Diet in Renal Disease formulae. *Antiviral therapy* 2008;13(6):761-70. [published Online First: 2008/10/09]
  145. Reid A, Stöhr W, Walker AS, et al. Severe renal dysfunction and risk factors associated with renal impairment in HIV-infected adults in Africa initiating antiretroviral therapy. *Clinical Infectious Diseases* 2008;46(8):1271-81. doi: <http://dx.doi.org/10.1086/533468>
  146. Ekat MH, Courpotin C, Diafouka M, et al. [Prevalence and factors associated with renal disease among patients with newly diagnoses of HIV in Brazzaville, Republic of Congo]. *Medecine et sante tropicales* 2013;23(2):176-80. doi: 10.1684/mst.2013.0170 [published Online First: 2013/06/22]
  147. Peters PJ, Moore DM, Mermin J, et al. Antiretroviral therapy improves renal function among HIV-infected Ugandans. *Kidney international* 2008;74(7):925-9. doi: 10.1038/ki.2008.305 [published Online First: 2008/07/11]
  148. Peck R, Baisley K, Kavishe B, et al. Decreased renal function and associated factors in cities, towns and rural areas of Tanzania: a community-based population survey. *Tropical medicine & international health : TM & IH* 2016;21(3):393-404. doi: 10.1111/tmi.12651 [published Online First: 2015/12/09]
  149. Nsagha DS, Pokam BT, Assob JC, et al. HAART, DOTS and renal disease of patients co-infected with HIV/AIDS and TB in the South West Region of Cameroon. *BMC public health* 2015;15:1040. doi: 10.1186/s12889-015-2331-z [published Online First: 2015/10/11]
  150. Mekuria Y, Yilma D, Mekonnen Z, et al. Renal Function Impairment and Associated Factors among HAART Naive and Experienced Adult HIV Positive Individuals in Southwest Ethiopia: A Comparative Cross Sectional Study. *PloS one* 2016;11(8):e0161180. doi: 10.1371/journal.pone.0161180 [published Online First: 2016/08/19]
  151. Adebamowo SN, Adeyemo AA, Tekola-Ayele F, et al. Impact of Type 2 Diabetes on Impaired Kidney Function in Sub-Saharan African Populations. *Frontiers in endocrinology* 2016;7:50. doi: 10.3389/fendo.2016.00050 [published Online First: 2016/06/16]
  152. Fiseha T, Kassim M, Yemane T. Chronic kidney disease and underdiagnosis of renal insufficiency among diabetic patients attending a hospital in Southern Ethiopia. *BMC nephrology* 2014;15:198. doi: 10.1186/1471-2369-15-198 [published Online First: 2014/12/17]
  153. Odenigbo C, Oguejiofor O, Onwubuya E, et al. The prevalence of chronic kidney disease in apparently healthy retired subjects in asaba, Nigeria. *Annals of medical and health sciences research* 2014;4(Suppl 2):S128-32. doi: 10.4103/2141-9248.138031
  154. Lucas GM, Clarke W, Kagaayi J, et al. Decreased kidney function in a community-based cohort of HIV-Infected

- and HIV-negative individuals in Rakai, Uganda. *Journal of Acquired Immune Deficiency Syndromes: JAIDS* 2010;55(4):491-4. doi: <http://dx.doi.org/10.1097/QAI.0b013e3181e8d5a8>
155. Booyesen HL, Woodiwiss AJ, Raymond A, et al. Chronic kidney disease epidemiology collaboration-derived glomerular filtration rate performs better at detecting preclinical end-organ changes than alternative equations in black Africans. *Journal of hypertension* 2016;34(6):1178-85. doi: 10.1097/hjh.0000000000000924 [published Online First: 2016/04/02]
156. Seape T, Gounden V, van Deventer HE, et al. Cystatin C- and creatinine-based equations in the assessment of renal function in HIV-positive patients prior to commencing Highly Active Antiretroviral Therapy. *Annals of clinical biochemistry* 2016;53(Pt 1):58-66. doi: 10.1177/0004563215579695 [published Online First: 2015/03/15]
157. Zachor H, Machekano R, Estrella MM, et al. Incidence of stage 3 chronic kidney disease and progression on tenofovir-based regimens. *AIDS (London, England)* 2016;30(8):1221-8. doi: 10.1097/qad.0000000000001041 [published Online First: 2016/02/03]
158. Adedeji TA, Adedeji NO, Adebisi SA, et al. Prevalence and Pattern of Chronic Kidney Disease in Antiretroviral-Naive Patients with HIV/AIDS. *Journal of the International Association of Providers of AIDS Care* 2015;14(5):434-40. doi: 10.1177/2325957415587570 [published Online First: 2015/05/28]
159. Matsha TE, Soita DJ, Hassan SM, et al. Deterioration, improvement of kidney function over time and determinants in the Cape Town Bellville South cohort. *Nephrology (Carlton, Vic)* 2014;19(10):638-47. doi: 10.1111/nep.12313 [published Online First: 2014/07/22]
160. Jao J, Lo W, Toro PL, et al. Factors associated with decreased kidney function in HIV-infected adults enrolled in the MTCT-Plus Initiative in sub-Saharan Africa. *Journal of Acquired Immune Deficiency Syndromes: JAIDS* 2011;57(1):40-5. doi: <http://dx.doi.org/10.1097/QAI.0b013e31821008eb>
161. Gupta SK, Ong'or WO, Shen C, et al. Reduced renal function is associated with progression to AIDS but not with overall mortality in HIV-infected Kenyan adults not initially requiring combination antiretroviral therapy. *Journal of the International AIDS Society* 2011;14:31. doi: 10.1186/1758-2652-14-31 [published Online First: 2011/06/15]
162. Myer L, Kamkuemah M, Kaplan R, et al. Low prevalence of renal dysfunction in HIV-infected pregnant women: implications for guidelines for the prevention of mother-to-child transmission of HIV. *Tropical Medicine & International Health* 2013;18(11):1400-5. doi: <http://dx.doi.org/10.1111/tmi.12194>
163. Mulenga LB, Kruse G, Lakhi S, et al. Baseline renal insufficiency and risk of death among HIV-infected adults on antiretroviral therapy in Lusaka, Zambia. *AIDS (London, England)* 2008;22(14):1821-7. doi: <http://dx.doi.org/10.1097/QAD.0b013e328307a051>
164. Ajayi S, Mamven M, Ojji D. eGFR and chronic kidney disease stages among newly diagnosed asymptomatic hypertensives and diabetics seen in a tertiary health center in Nigeria. *Ethnicity & disease* 2014;24(2):220-5. [published Online First: 2014/05/09]
165. Nwankwo EA, Nwankwo B, Mubi B. Prevalence of impaired kidney function in hospitalized hypertensive patients in Maiduguri, Nigeria. *The Internet Journal of Internal Medicine* 2006;6(1)
166. Edwards JK, Bygrave H, Van den Bergh R, et al. HIV with non-communicable diseases in primary care in Kibera, Nairobi, Kenya: characteristics and outcomes 2010-2013. *Transactions of the Royal Society of Tropical Medicine and Hygiene* 2015;109(7):440-6. doi: 10.1093/trstmh/trv038 [published Online First: 2015/05/23]
167. Kamkuemah M, Kaplan R, Bekker LG, et al. Renal impairment in HIV-infected patients initiating tenofovir-containing antiretroviral therapy regimens in a Primary Healthcare Setting in South Africa. *Tropical medicine & international health : TM & IH* 2015;20(4):518-26. doi: 10.1111/tmi.12446 [published Online First: 2014/12/03]
168. Levey AS, Coresh J, Balk E, et al. National Kidney Foundation practice guidelines for chronic kidney disease: evaluation, classification, and stratification. *Annals of internal medicine* 2003;139(2):137-47.
169. Abdelsatir S, Al-Sofi A, Elamin S, et al. The potential role of nursing students in the implementation of community-based hypertension screening programs in Sudan. *Arab journal of nephrology and transplantation* 2013;6(1):51-4. [published Online First: 2013/01/04]
170. Agaba EI, Agaba PA, Sirisena ND, et al. Renal disease in the acquired immunodeficiency syndrome in north central Nigeria. *Nigerian journal of medicine : journal of the National Association of Resident Doctors of Nigeria* 2003;12(3):120-5. [published Online First: 2004/01/24]
171. Coresh J, Astor BC, McQuillan G, et al. Calibration and random variation of the serum creatinine assay as critical elements of using equations to estimate glomerular filtration rate. *American journal of kidney diseases : the official journal of the National Kidney Foundation* 2002;39(5):920-9. doi: 10.1053/ajkd.2002.32765 [published Online First: 2002/04/30]
172. Liu WS, Chung YT, Yang CY, et al. Serum creatinine determined by Jaffe, enzymatic method, and isotope dilution-liquid chromatography-mass spectrometry in patients under hemodialysis. *Journal of clinical laboratory analysis* 2012;26(3):206-14. doi: 10.1002/jcla.21495 [published Online First: 2012/05/26]
173. Drion I, Cobbaert C, Groenier KH, et al. Clinical evaluation of analytical variations in serum creatinine measurements: why laboratories should abandon Jaffe techniques. *BMC nephrology* 2012;13(1):133.
174. Bachmann LM, Nilsson G, Bruns DE, et al. State of the art for measurement of urine albumin: comparison of

- 1  
2  
3 routine measurement procedures to isotope dilution tandem mass spectrometry. *Clinical chemistry*  
4 2014;60(3):471-80. doi: 10.1373/clinchem.2013.210302 [published Online First: 2013/11/28]
- 5 175. Levey AS, Stevens LA. Estimating GFR using the CKD epidemiology collaboration (CKD-EPI) creatinine  
6 equation: more accurate GFR estimates, lower CKD prevalence estimates, and better risk predictions.  
7 *American journal of kidney diseases: the official journal of the National Kidney Foundation* 2010;55(4):622.
- 8 176. Cobo G, Hecking M, Port FK, et al. Sex and gender differences in chronic kidney disease: progression to end-stage  
9 renal disease and haemodialysis. *Clinical science (London, England : 1979)* 2016;130(14):1147-63. doi:  
10.1042/cs20160047 [published Online First: 2016/06/03]
- 10 177. Nitsch D, Grams M, Sang Y, et al. Associations of estimated glomerular filtration rate and albuminuria with  
11 mortality and renal failure by sex: a meta-analysis. *BMJ (Clinical research ed)* 2013;346:f324. doi:  
12 10.1136/bmj.f324 [published Online First: 2013/01/31]
- 13 178. Poggio ED, Rule AD. A critical evaluation of chronic kidney disease—should isolated reduced estimated  
14 glomerular filtration rate be considered a ‘disease’? *Nephrology Dialysis Transplantation* 2009;24(3):698-700.
- 15 179. Hill NR, Fatoba ST, Oke JL, et al. Global Prevalence of Chronic Kidney Disease—A Systematic Review and Meta-  
16 Analysis. *PloS one* 2016;11(7):e0158765.
- 17 180. Saran R, Li Y, Robinson B, et al. US Renal Data System 2014 Annual Data Report: Epidemiology of Kidney  
18 Disease in the United States. *American journal of kidney diseases : the official journal of the National Kidney*  
19 *Foundation* 2015;66(1 Suppl 1):Svii, S1-305. doi: 10.1053/j.ajkd.2015.05.001 [published Online First:  
20 2015/06/27]
- 21 181. Bruck K, Stel VS, Gambaro G, et al. CKD Prevalence Varies across the European General Population. *Journal of*  
22 *the American Society of Nephrology : JASN* 2016;27(7):2135-47. doi: 10.1681/asn.2015050542 [published  
23 Online First: 2015/12/25]
- 24 182. Ingsathit A, Thakkinstian A, Chaiprasert A, et al. Prevalence and risk factors of chronic kidney disease in the Thai  
25 adult population: Thai SEEK study. *Nephrology Dialysis Transplantation* 2010;25(5):1567-75.
- 26 183. Singh AK, Farag YM, Mittal BV, et al. Epidemiology and risk factors of chronic kidney disease in India - results  
27 from the SEEK (Screening and Early Evaluation of Kidney Disease) study. *BMC nephrology* 2013;14:114.  
28 doi: 10.1186/1471-2369-14-114 [published Online First: 2013/05/30]
- 29 184. Imai E, Horio M, Watanabe T, et al. Prevalence of chronic kidney disease in the Japanese general population.  
30 *Clinical and experimental nephrology* 2009;13(6):621-30. doi: 10.1007/s10157-009-0199-x [published Online  
31 First: 2009/06/11]
- 32 185. Hwang SJ, Tsai JC, Chen HC. Epidemiology, impact and preventive care of chronic kidney disease in Taiwan.  
33 *Nephrology (Carlton, Vic)* 2010;15 Suppl 2:3-9. doi: 10.1111/j.1440-1797.2010.01304.x [published Online  
34 First: 2010/07/09]
- 35 186. Lin B, Shao L, Luo Q, et al. Prevalence of chronic kidney disease and its association with metabolic diseases: a  
36 cross-sectional survey in Zhejiang province, Eastern China. *BMC nephrology* 2014;15:36. doi: 10.1186/1471-  
37 2369-15-36 [published Online First: 2014/02/25]
- 38 187. Tomonaga Y, Risch L, Szucs TD, et al. The Prevalence of Chronic Kidney Disease in a Primary Care Setting: A  
39 Swiss Cross-Sectional Study. *PloS one* 2013;8(7):e67848. doi: 10.1371/journal.pone.0067848
- 40 188. Jha V, Garcia-Garcia G, Iseki K, et al. Chronic kidney disease: global dimension and perspectives. *Lancet*  
41 2013;382(9888):260-72. doi: 10.1016/s0140-6736(13)60687-x [published Online First: 2013/06/04]
- 42 189. Barsoum RS. Chronic kidney disease in the developing world. *The New England journal of medicine*  
43 2006;354(10):997-9. doi: 10.1056/NEJMp058318 [published Online First: 2006/03/10]
- 44 190. UNAIDS. HIV and AIDS estimates (2015) 2015 [cited 2015]. Available from:  
45 <http://www.unaids.org/en/regionscountries/countries/senegal> accessed July 15, 2015.
- 46 191. UNAIDS. HIV and AIDS estimates (2015): UNAIDS; 2015 [Available from:  
47 <http://www.unaids.org/en/regionscountries/countries/swaziland> accessed August 1, 2015
- 48 192. Matic S, Lazarus JV, Donoghoe MC. HIV/AIDS in Europe: moving from death sentence to chronic disease  
49 management: World Health Organization 2006.
- 50 193. Estrella M, Fine DM, Gallant JE, et al. HIV type 1 RNA level as a clinical indicator of renal pathology in HIV-  
51 infected patients. *Clinical infectious diseases : an official publication of the Infectious Diseases Society of*  
52 *America* 2006;43(3):377-80. doi: 10.1086/505497 [published Online First: 2006/06/29]
- 53 194. Deti EK, Thiebaut R, Bonnet F, et al. Prevalence and factors associated with renal impairment in HIV-infected  
54 patients, ANRS C03 Aquitaine Cohort, France. *HIV Med* 2010;11(5):308-17. doi: 10.1111/j.1468-  
55 1293.2009.00780.x [published Online First: 2009/12/17]
- 56 195. Fernando SK, Finkelstein FO, Moore BA, et al. Prevalence of chronic kidney disease in an urban HIV infected  
57 population. *American Journal of the Medical Sciences* 2008;335(2):89-94. doi:  
58 <http://dx.doi.org/10.1097/MAJ.0b013e31812e6b34>
- 59 196. Cao Y, Gong M, Han Y, et al. Prevalence and risk factors for chronic kidney disease among HIV-infected  
60 antiretroviral therapy-naïve patients in Mainland China: A multicenter cross-sectional study. *Nephrology*  
2013;18(4):307-12. doi: 10.1111/nep.12031
197. Rustarazo SB, Fuente SR, de Miguel SC, et al. Prevalence and spectrum of chronic kidney disease in HIV-positive

- patients. *European Journal of Hospital Pharmacy: Science and Practice* 2012;19(2):96-97.
198. Menezes AM, Torelly J, Jr., Real L, et al. Prevalence and risk factors associated to chronic kidney disease in HIV-infected patients on HAART and undetectable viral load in Brazil. *PloS one* 2011;6(10):e26042. doi: 10.1371/journal.pone.0026042 [published Online First: 2011/10/25]
199. Sicotte M, Langlois ÉV, Aho J, et al. Association between nutritional status and the immune response in HIV+ patients under HAART: protocol for a systematic review. *Systematic reviews* 2014;3(1):9.
200. Taylor BS, Sobieszczyk ME, McCutchan FE, et al. The challenge of HIV-1 subtype diversity. *The New England journal of medicine* 2008;358(15):1590-602. doi: 10.1056/NEJMra0706737 [published Online First: 2008/04/12]
201. Wools-Kaloustian KK, Gupta SK. Will there be an epidemic of HIV-related chronic kidney disease in sub-Saharan Africa? Too soon to tell. *Kidney international* 2008;74(7):845-7. doi: 10.1038/ki.2008.326 [published Online First: 2008/09/17]
202. Pokroy-Shapira E, Gelernter I, Molad Y. Evolution of chronic kidney disease in patients with systemic lupus erythematosus over a long-period follow-up: a single-center inception cohort study. *Clinical rheumatology* 2014;33(5):649-57.
203. Mak A, Mok CC, Chu WP, et al. Renal damage in systemic lupus erythematosus: a comparative analysis of different age groups. *Lupus* 2007;16(1):28-34. [published Online First: 2007/02/08]
204. Rabbani MA, Tahir MH, Siddiqui BK, et al. Renal involvement in systemic lupus erythematosus in Pakistan. *JPMA The Journal of the Pakistan Medical Association* 2005;55(8):328-32. [published Online First: 2005/09/17]
205. Chiu H-Y, Huang H-L, Li C-H, et al. Increased risk of chronic kidney disease in rheumatoid arthritis associated with cardiovascular complications—A National Population-Based Cohort Study. *PloS one* 2015;10(9):e0136508.
206. Barsoum RS. End-stage renal disease in North Africa. *Kidney international Supplement* 2003(83):S111-4. doi: 10.1046/j.1523-1755.63.s83.23.x [published Online First: 2003/07/17]
207. Naicker S. End-stage renal disease in Sub-Saharan Africa. *Kidney inter, Suppl* 2013;3(2):161-63. doi: 10.1038/kisup.2013.4
208. Naicker S. Challenges for nephrology practice in Sub-Saharan Africa. *Nephrology, dialysis, transplantation : official publication of the European Dialysis and Transplant Association - European Renal Association* 2010;25(3):649-50. doi: 10.1093/ndt/gfp727
209. Noubiap JJ, Naidoo J, Kengne AP. Diabetic nephropathy in Africa: A systematic review. *World journal of diabetes* 2015;6(5):759-73. doi: 10.4239/wjd.v6.i5.759 [published Online First: 2015/06/13]
210. Brook MO, Bottomley MJ, Mevada C, et al. Repeat testing is essential when estimating chronic kidney disease prevalence and associated cardiovascular risk. *QJM : monthly journal of the Association of Physicians* 2012;105(3):247-55. doi: 10.1093/qjmed/hcr171 [published Online First: 2011/10/04]

1  
2  
3  
4  
5  
6  
7  
8  
9  
10  
11  
12  
13  
14  
15  
16  
17  
18  
19  
20  
21  
22  
23  
24  
25  
26  
27  
28  
29  
30  
31  
32  
33  
34  
35  
36  
37  
38  
39  
40  
41  
42  
43  
44  
45  
46  
47  
48  
49  
50  
51  
52  
53  
54  
55  
56  
57  
58  
59  
60

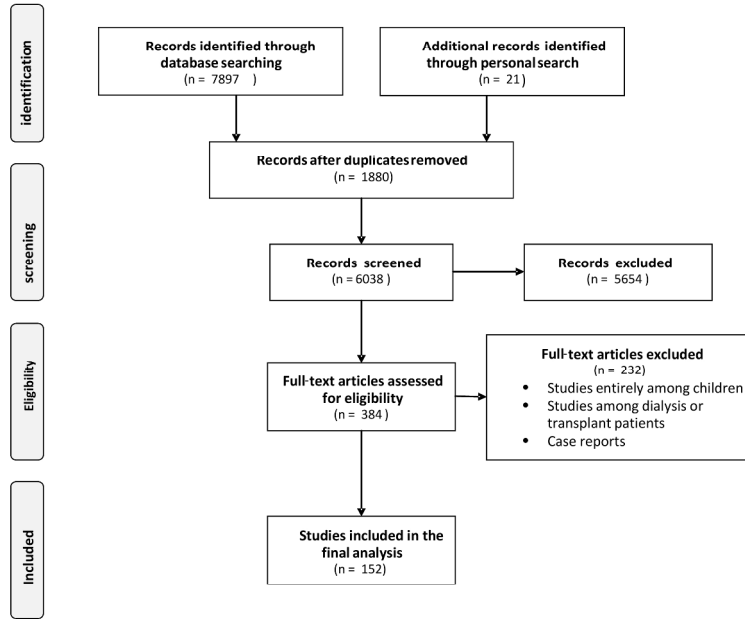

Fig 1

Fig1

254x190mm (300 x 300 DPI)

ew only

1  
2  
3  
4  
5  
6  
7  
8  
9  
10  
11  
12  
13  
14  
15  
16  
17  
18  
19  
20  
21  
22  
23  
24  
25  
26  
27  
28  
29  
30  
31  
32  
33  
34  
35  
36  
37  
38  
39  
40  
41  
42  
43  
44  
45  
46  
47  
48  
49  
50  
51  
52  
53  
54  
55  
56  
57  
58  
59  
60

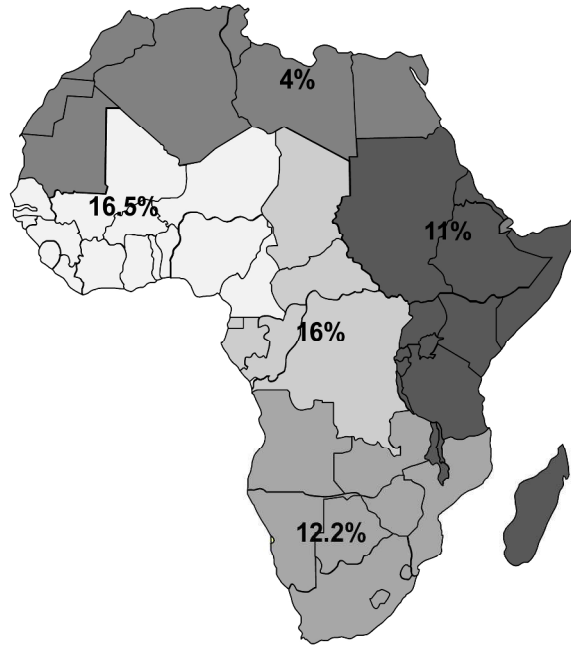

**Fig 2**

Fig2

254x190mm (300 x 300 DPI)

ew only



1  
2  
3  
4  
5  
6  
7  
8  
9  
10  
11  
12  
13  
14  
15  
16  
17  
18  
19  
20  
21  
22  
23  
24  
25  
26  
27  
28  
29  
30  
31  
32  
33  
34  
35  
36  
37  
38  
39  
40  
41  
42  
43  
44  
45  
46  
47  
48  
49  
50  
51  
52  
53  
54  
55  
56  
57  
58  
59  
60

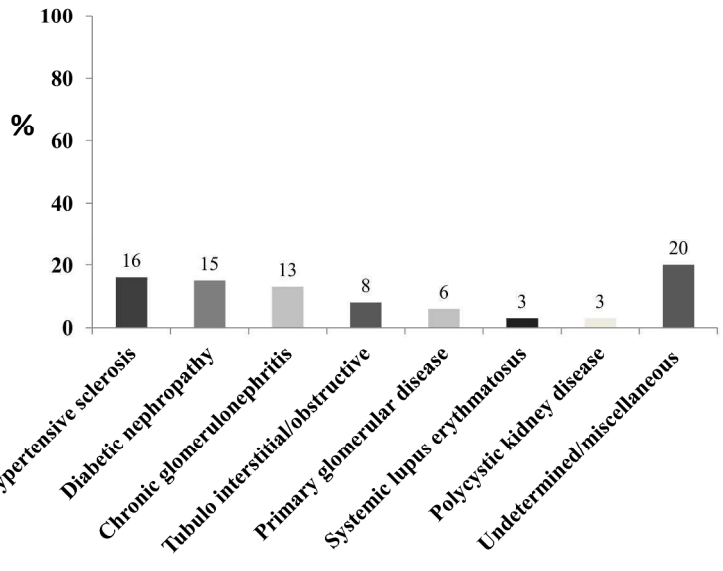

**Fig 3**

Fig 3

254x190mm (300 x 300 DPI)

ew only

**S1 Table.** Search strategy adopted in PubMed and Ovid MEDLINE

1. exp Renal Dialysis/
2. (hemodialysis or haemodialysis).tw.
3. (hemofiltration or haemofiltration).tw.
4. (hemodiafiltration or haemodiafiltration).tw.
5. dialysis.tw.
6. (CAPD or CCPD or APD).tw.
7. Renal Insufficiency/
8. Kidney Failure/
9. exp Renal Insufficiency, Chronic/
10. Kidney Diseases/
11. Uremia/
12. (end-stage renal or end-stage kidney or endstage renal or endstage kidney).tw.
13. (ESRF or ESKF or ESRD or ESKD).tw.
14. (chronic kidney or chronic renal).tw.
15. (CKF or CKD or CRF or CRD).tw.
16. (predialysis or pre-dialysis).tw.
17. ur?emi\$.tw.
18. 1 or 2 or 3 or 4 or 5 or 6 or 7 or 8 or 9 or 10 or 11 or 12 or 13 or 14 or 15 or 16 or 17
19. afric\$.ti,ab,kw,tw,mp.
20. 18 and 19

S2 Table: Studies among CKD patients

| Study ID                  | Year<br>Country<br>Region   | N   | Population Characteristic                                                                                                 | biopsy | causes of CKD                                                                                                                                                   |
|---------------------------|-----------------------------|-----|---------------------------------------------------------------------------------------------------------------------------|--------|-----------------------------------------------------------------------------------------------------------------------------------------------------------------|
| El Khayat S <sup>31</sup> | 2013, Morocco,<br>North     | 134 | Age( years): 54.4±18.1<br>Male gender: 58.65%                                                                             | no     | DN: 44.02%<br>H.scl: 11.2%<br>Tub.int: 9.7%<br>SLE: 5%<br>Ch.GN: 3.7%<br>Undetermined: 26.11%                                                                   |
| Seck S <sup>32</sup>      | 2013, Senegal,<br>West      | 60  | Age (years): 70.5±54.6<br>Male gender: 52%<br>Hypertension: 20%<br>SBP (mmHg): 167 ± 78<br>DBP (mmHg): 95 ± 55<br>DM: 18% | no     | H.scl: 30%<br>DN: 25%                                                                                                                                           |
| Seck S <sup>33</sup>      | 2008, Senegal,<br>West      | 118 | Age (years): 39.28±16.4<br>Male gender: 56%<br>SBP (mmHg): 160±15<br>DBP (mmHg): 90±15                                    | yes    | Ch.GN: 35%<br>Vascular nephropathy: 20.2%<br>Tub.int: 12%<br>DN: 10.5%<br>PKD: 4.2%<br>Autoimmune: 4.2%<br>Neoplasm: 1.6%<br>H.scl: 0.8%<br>Undetermined: 11.5% |
| Bourquia A <sup>34</sup>  | 2002, Morocco,<br>North     | 420 | Age (years): 46±3<br>Male gender: 52%                                                                                     | no     | PKD: 6.5%                                                                                                                                                       |
| Ouattara B <sup>35</sup>  | 2011, Ivory Coast,<br>West  | 301 | Age (years): 44±10<br>Male gender: 56%<br>Hypertension: 33.5%<br>DM: 12.3%                                                | no     | Nephroangiosclerosis:25.2%<br>HIV nephropathy:17%<br>Interstitial nephritis: 10.3%<br>DN: 9.6%<br>Ch.GN: 6.6%<br>PKD:2.3%<br>Undetermined: 29.2%                |
| Lengani A <sup>36</sup>   | 1997, Burkina<br>Faso, West | 174 | Age (years): 36±15<br>Male gender: 63%<br>Hypertension: 64.9%                                                             | no     | Ch.GN: 42.5%<br>Vascular nephropathy: 23.6%<br>Tub.int: 16.1%<br>PKD: 1%<br>Undetermined: 16.8%                                                                 |
| Afifi A <sup>37</sup>     | 2005, Egypt, North          | 220 | Not known                                                                                                                 | no     | DN: 28.2%<br>H.scl: 25.5%<br>Obstructive uropathy: 13.5%<br>Cystitis: 6.8%<br>Simple cyst: 4.5%<br>Undetermined: 29.5%                                          |
| Diouf B <sup>38</sup>     | 2000, Senegal,<br>West      | 261 | Age (years): 44(range:15-88)<br>Male gender: 46%                                                                          | no     | Nephroangiosclerosis: 25%<br>DN: 20.5%<br>Ch.GN: 15%<br>Undetermined : 34%                                                                                      |
| Niang A <sup>39</sup>     | 2008, Senegal,<br>West      | 258 | Age (years): 28 (range:15-79)<br>Male gender: 75%<br>Hypertension: 12.2%                                                  | yes    | FSGS: 52%<br>MGN: 12%<br>Minimal change diseases: 7.7%                                                                                                          |
| Sabi K <sup>40</sup>      | 2011, Togo, West            | 398 | Age (years): mean: 42.6                                                                                                   | not    | Ch.GN: 40.2%                                                                                                                                                    |

|                            |                        |      |                                                                                                                                  |       |                                                                                                                                                                                                                                                       |
|----------------------------|------------------------|------|----------------------------------------------------------------------------------------------------------------------------------|-------|-------------------------------------------------------------------------------------------------------------------------------------------------------------------------------------------------------------------------------------------------------|
|                            |                        |      | Male gender: 57%                                                                                                                 | known | Tub.int: 20.9%<br>Nephroangiosclerosis: 17.6%                                                                                                                                                                                                         |
| Ulasi I <sup>41</sup>      | 2010, Nigeria,<br>West | 1538 | Age (years): 42.55±15.43<br>Male gender: 65%<br>Hypertension: 17.2%<br>DM: 11.8%                                                 | yes   | H.scl: 17.2%<br>Ch.GN:14.6%<br>DN:11.8%<br>Undetermined:51.6%<br>Others: 4.6%                                                                                                                                                                         |
| AbdErrahim E <sup>42</sup> | 2001, Tunis,<br>North  | 1471 | Age (years): 38.3±14.6<br>Male gender: 69%                                                                                       | no    | DN: 20.3%                                                                                                                                                                                                                                             |
| Abdou N <sup>43</sup>      | 2003, Senegal,<br>West | 115  | Age (years): 28 (IQR:5-60)<br>Male gender: 56%                                                                                   | yes   | FSGS: 46.9%<br>MGN:8.7%<br>Minimal change disease:6.1%<br>Endocapillary GN: 2.6%<br>Mesangioproliferative: 1.7%<br>Extracapillary GN:1.7%<br>IgA nephropathy:1.7%<br>SLE: 13%<br>H.scl: 2%<br>Undetermined: 7%<br>Others:11%                          |
| Afifi A <sup>44</sup>      | 2004, Egypt, North     | 3172 | Age (years): 56.5±29.2                                                                                                           | yes   | DN: 14.5%                                                                                                                                                                                                                                             |
| Afifi A <sup>45</sup>      | 1999, Egypt, North     | 4905 | Age (years): 45.6±14.2<br>Male gender: 62.4%                                                                                     | yes   | H.scl: 28%<br>Ch.GN: 16.2%<br>Obstructive uropathy: 15%<br>DN: 8.9%<br>PKD: 3%<br>Undetermined: 16.2%                                                                                                                                                 |
| Agaba E <sup>46</sup>      | 2009, Nigeria,<br>West | 130  | Age (years): 41±16<br>Male gender: 68%                                                                                           | no    | Ch.GN: 39%<br>H.scl: 34.6%<br>DN: 11.8%<br>PKD: 6.9%<br>Undetermined: 7.7%                                                                                                                                                                            |
| Alashek W <sup>47</sup>    | 2012, Libya, North     | 2417 | Age (years): 49 (range: 36-61)<br>Male gender: 58%                                                                               | no    | DN: 26.5%<br>Ch.GN: 21.2%<br>H.scl: 14.6%<br>Congenital and hereditary: 12.3%<br>PKD: 6.3%<br>Obstructive uropathy: 5%<br>Chronic pyelonephritis: 2%<br>Interstitial nephritis: 1.2%<br>Autoimmune disease: 0.7%<br>Other: 2.9%<br>undetermined: 7.3% |
| Alasia D <sup>48</sup>     | 2012, Nigeria,<br>West | 320  | Age (years): 46.2±17.6<br>Male gender: 63%<br>SBP (mmHg): 171.2±31.9<br>DBP(mmHg): 102.5±27.4                                    | yes   | Ch.GN: 45.7%<br>H.scl: 29.8%<br>DN: 17.5%<br>PKD: 3%<br>Obstructive uropathy: 2%<br>Undetermined: 2%                                                                                                                                                  |
| Alebiosu C <sup>49</sup>   | 2006, Nigeria,<br>West | 153  | Age (years): 39.6±14.8<br>Male gender: 59%<br>Hypertension: 38.5%<br>SBP (mmHg): 167.3±15.5<br>DBP (mmHg): 106±28.9<br>DM: 13.1% | no    | Ch.GN: 41.2%<br>H.scl: 26.1%<br>DN: 13.1%                                                                                                                                                                                                             |

|                            |                           |      |                                                                                                                                                             |     |                                                                                                                                                                                                                                                                                                                                                                                                                          |
|----------------------------|---------------------------|------|-------------------------------------------------------------------------------------------------------------------------------------------------------------|-----|--------------------------------------------------------------------------------------------------------------------------------------------------------------------------------------------------------------------------------------------------------------------------------------------------------------------------------------------------------------------------------------------------------------------------|
| Amira C <sup>50</sup>      | 2012, Nigeria, West       | 201  | Age (years): 47.5±15.7<br>Male gender: 56.2<br>Hypertension: 42.8%<br>DM: 13.4%                                                                             | no  | H.scl: 42.8%<br>Ch.GN: 15.9%<br>Obstructive uropathy: 14.9%<br>DN: 13.4%<br>PKD: 1%<br>SLE: 1%<br>Sickle cell nephropathy: 1%<br>Analgesic nephropathy: 0.5%<br>Undetermined : 9.5%                                                                                                                                                                                                                                      |
| Arogundade F <sup>51</sup> | 2011, Nigeria, West       | 760  | Age(years): 36 (range:15-90)<br>Male gender: 70.3%<br>Hypertension: 72.4%<br>SBP (mmHg): 160 (range:120 – 270)<br>DBP (mmHg): 100 (range:50 – 209 )         | no  | Ch. GN: 43.7%<br>H.scl: 31.1%<br>Obstructive uropathy: 6.7%<br>DN: 3.7%<br>Tub.int: 2.2%<br>PKD: 0.7%<br>Undetermined : 12%                                                                                                                                                                                                                                                                                              |
| Counil É <sup>52</sup>     | 2008, Tunis, North        | 6397 | Age (years): 51.4±18.0<br>Male gender: 56.5%                                                                                                                | no  | DN: 35%<br>H.scl: 25.3%<br>Tub.int: 19.7%<br>Ch.GN: 13%<br>PKD: 2.2%<br>Undetermined: 52.8%                                                                                                                                                                                                                                                                                                                              |
| Chijioke A <sup>53</sup>   | 2012, Nigeria, West       | 116  | Age (years): Male: 50.89±13.43 and Female: 48.22±14.70<br>Male gender: 61.2%<br>SBP(mmHg): 153.41±27.12<br>DBP (mmHg): 93.92±17.19                          | no  | H.scl: 52.58%<br>Ch.GN: 17.2%<br>Tub.int: 17.1%<br>PKD: 4.3%<br>DN: 2.6%<br>Chronic pyelonephritis: 2.6%<br>Obstructive uropathy: 1.7%<br>Undetermined: 1.9%                                                                                                                                                                                                                                                             |
| Madala N <sup>54</sup>     | 2014, South Africa, South | 302  | Age (years): 47.1±17.0<br>Male gender: 45%<br>SBP (mmHg): (male) 144.6 ± 28.3. (female) 141.1 ± 25.5<br>DBP(mmHg): (male) 84.2 ± 18.1. (female) 81.0 ± 19.0 | yes | H.scl: 75.2%<br>DN: 29.8%<br>HIV nephropathy: 28.6%<br>Ch.GN: 7%<br>Tub.int: 6%<br>Undetermined: 6%                                                                                                                                                                                                                                                                                                                      |
| Okpechi I <sup>55</sup>    | 2013, South Africa, South | 111  | Age (years): 66.3 ± 5.7<br>Male gender: 47.7%<br>Hypertension: 71%<br>DM: 19.8%                                                                             | yes | MGN: 14.4%<br>Mesangioproliferative GN: 8.1%<br>Crescentic GN: 7.2%<br>Mesangiocapillary GN: 3.6%<br>Post infectious GN: 2.7%<br>FSGS: 1.8%<br>IgAN nephropathy: 0.9%<br>DN: 12.6%<br>Ch.GN: 5.4%<br>SLE: 4.5%<br>H.scl: 3.6%<br>Amyloidosis: 2.7%<br>Myeloma: 2.7%<br>Crescentic GN: 1.8%<br>HIV nephropathy: 0.9%<br>Thrombocytopenic purpura: 0.9%<br>Hemolytic uremic: 0.9%<br>Tub.int: 17.2%<br>Miscellaneous: 8.1% |

|                             |                           |      |                                                                                                                                                                         |     |                                                                                                                                                                                                                                                                                                                                                  |
|-----------------------------|---------------------------|------|-------------------------------------------------------------------------------------------------------------------------------------------------------------------------|-----|--------------------------------------------------------------------------------------------------------------------------------------------------------------------------------------------------------------------------------------------------------------------------------------------------------------------------------------------------|
| Laleye A <sup>56</sup>      | 2012, Benin, West         | 3783 | Age (years): 47.2 (range:29 - 70 )<br>Male gender: 24%<br>Hypertension: 59%                                                                                             | no  | PKD: 1.8%                                                                                                                                                                                                                                                                                                                                        |
| Okunola Y <sup>57</sup>     | 2013, Nigeria, West       | 300  | Age (years): 49 ±16.25<br>Male gender: 68%                                                                                                                              | no  | H.Scl: 38.8%<br>Ch.GN: 28.8%<br>DN:22.5%<br>PKD:2.7%<br>SLE: 1.1%<br>Undetermined: 6.1%                                                                                                                                                                                                                                                          |
| Bello B <sup>58</sup>       | 2013, Nigeria, West       | 120  | Age (years): 47 + 14<br>Male gender: 60%<br>SBP(mmHg): 162 ± 32<br>DBP(mmHg): 94.9 ± 19.6                                                                               | yes | H.scl: 45%<br>Ch.GN: 15.8%<br>DN: 12.5%<br>Obstructive uropathy : 12.5%<br>PKD: 3.3%<br>Ch. Pyelonephritis: 2.5%<br>SLE: 1.7%<br>Analgesic nephropathy: 1.7%<br>Sickle cell nephropathy: 1.7%<br>Toxic nephropathy: 0.8%<br>Undetermined: 2.5%                                                                                                   |
| El-Minshawy O <sup>59</sup> | 2011, Egypt, North        | 800  | Age(years): 46 ± 13<br>Male gender: 65%                                                                                                                                 | no  | H.scl: 20%<br>Obstructive uropathy: 15%<br>Ch.GN: 11%<br>SLE: 9%<br>DN: 8%<br>Analgesic nephropathy: 5%<br>Chronic pyelonephritis: 5%<br>Undetermined: 27%                                                                                                                                                                                       |
| Okpechi I <sup>60</sup>     | 2010, South Africa, South | 294  | Age (years): 33.9 ± 12.0<br>Male gender: 45.2%<br>Hypertension:39.8%                                                                                                    | yes | Crescentic GN: 5%<br>Ch GN: 15.7%<br>FSGS: 15.7%<br>IgA nephropathy: 1.7%<br>Minimal change disease: 6.6%<br>Mesangiocapillary GN: 19%<br>MGN: 14.9%<br>Mesangial proliferative GN: 12.4%<br>Postinfectious GN : 9%<br>HIV nephropathy: 42.8%<br>SLE: 13.3%<br>DN: 9.2%<br>MGN: 6.9%<br>Ch.GN: 5.85%<br>Mesnagiocapillary: 4.6%<br>Others: 17.4% |
| Madala N <sup>61</sup>      | 2012, South Africa, South | 148  | Age(years): 41.4 ± 13.1<br>Male gender: 37.2%<br>SBP (mmHg): African (133.6 ± 20.2). Indian (130.1 ± 20.6)<br>DBP (mmHg): African:(133.6 ± 20.2). Indian (130.1 ± 20.6) | no  | Ch.GN: 39.2%<br>H.scl: 34.4%<br>DN: 7.4%<br>PKD:6.8%<br>Undetermined: 3.4%                                                                                                                                                                                                                                                                       |
| El Farouki M <sup>62</sup>  | 2013, Morocco, North      | 207  | Age (years): 52.43 ± 15.48<br>Male gender: 64.3%<br>Hypertension: 73.9%<br>DM:41.5%                                                                                     | no  | DN: 41.5%<br>Ch.GN: 16%<br>Tub.int: 14%<br>H.scl: 12%                                                                                                                                                                                                                                                                                            |

|                          |                           |      |                                                                                       |     |                                                                                                                                                                                                                                                                                                                                                 |
|--------------------------|---------------------------|------|---------------------------------------------------------------------------------------|-----|-------------------------------------------------------------------------------------------------------------------------------------------------------------------------------------------------------------------------------------------------------------------------------------------------------------------------------------------------|
|                          |                           |      |                                                                                       |     | PKD: 1%<br>Undetermined: 15.5%                                                                                                                                                                                                                                                                                                                  |
| Okpechi I <sup>63</sup>  | 2011, South Africa, South | 1284 | Age (years): 36.8 ±14.0<br>Male gender: 45.2%                                         | yes | Mesangiocapillary: 20.4%<br>Mesangioproliferative: 19.2%<br>MGN: 18.5%<br>Crescentic GN: 11.4%<br>FSGS: 10.5%<br>Post infectious: 8.2%<br>Minimal change: 6%<br>IgA nephropathy: 5.8%<br>SLE: 19%<br>Infection related: 15%<br>Vascular causes: 9%<br>Hereditary: 6%<br>Undetermined: 3.5%                                                      |
| Niang A <sup>64</sup>    | 2014, Senegal, West       | 62   | Age (years): 47 ± 13<br>Male gender: 55%                                              | no  | Nephrosclerosis: 40.3%<br>Ch.GN: 21%<br>DN: 19.4%<br>PKD: 3.2%<br>Tub.int: 1.6%<br>Undetermined: 14.5%                                                                                                                                                                                                                                          |
| Buargub M <sup>65</sup>  | 2008, Libya, North        | 124  | Age (years): 47.4±15<br>Male gender: 62%                                              | no  | DN: 27.4%<br>H.scl: 10.5%<br>Ch.GN: 8%<br>Nephrolithiasis: 7.3%<br>Amyloidosis: 6.8%<br>Chronic interstitial nephritis: 6.4%<br>PKD: 4%<br>Ischemic : 3.2%<br>SLE: 0.8%<br>Familial: 0.8%<br>Undetermined: 30.6%                                                                                                                                |
| Chijioke A <sup>66</sup> | 2010, Nigeria, West       | 436  | Age (years): 47.4 ± 16.2<br>Male gender: 57%                                          | no  | PKD: 15.4%                                                                                                                                                                                                                                                                                                                                      |
| Elsharif M <sup>67</sup> | 2011, Sudan, East         | 224  | Age (years): 45.78± 17.16<br>Male gender: 67.8%                                       | yes | H.sclerosis: 14.29%<br>Obstructive uropathy: 11.61%<br>Ch.GN: 9.8%<br>DN: 8.04%<br>Anaglesic nephropathy: 1.34%<br>Renovascular: 0.45%<br>PKD: 0.9%<br>Undetermined: 53.57%                                                                                                                                                                     |
| Elkhatib M <sup>68</sup> | 2012, Egypt, North        | 437  | Age (years): 89% <50 years.<br>8.5% 50–60 years and 3% > 50 years<br>Male gender: 52% | yes | SLE: 24.7%<br>MGN: 10.9%<br>FSGS: 6.8%<br>Mesangiocapillary GN: 6.7%<br>Acute interstitial nephritis: 6.25%<br>Membranous nephropathy: 5.4%<br>Crescentic GN: 5.4%<br>Chronic interstitial nephritis: 4.5%<br>Minimal change disease: 3.8%<br>focal proliferative GN: 3.6%<br>Amyloidosis: 2.7%<br>Nephrosclerosis: 1.13%<br>Undetermined: 3.6% |

|                             |                        |     |                                                                                  |     |                                                                                                                                                                                                      |
|-----------------------------|------------------------|-----|----------------------------------------------------------------------------------|-----|------------------------------------------------------------------------------------------------------------------------------------------------------------------------------------------------------|
| Ibrahim S <sup>69</sup>     | 2012, Egypt, North     | 924 | Age (years): 26.5 ± 14.6 years<br>Male gender: 47%                               | yes | FSGS: 28.57%<br>mesangioproliferative GN: 20.02%<br>MGN : 14%<br>Minimal change disease: 8.55%<br>Amyloidosis: 5.52%<br>Diffuse proliferative GN: 5.20%<br>Focal proliferative GN: 3.68%<br>DN:0.22% |
| Ayach G <sup>70</sup>       | 2011, Morocco, North   | 386 | Age (years): 19 (IQR:12-25)<br>Male gender: 61%                                  | yes | MGN :79.20%<br>FSGS: 9.10%<br>Extramembranous glomerulonephritis:9.10%<br>Renal amyloidosis: 2.6%.                                                                                                   |
| Ramilitiana B <sup>71</sup> | 2016, Madagascar, East | 239 | Age (years): 45.5( range: 16-82)<br>Male gender: 40%<br>Diabetes mellitus: 12.6% | No  | Ch.GN: 40.1%<br>H.Scl: 35.6%<br>DN:12.6%<br>Tub.int: 10.46%                                                                                                                                          |
| Zajjari Y <sup>72</sup>     | 2012, Morocco, North   | 16  | Age (years): 60 (47-79)<br>Male gender: 81.3%<br>Hypertension: 56.3%             | Yes | DN: 25%                                                                                                                                                                                              |

Tub. Int: tubulo-interstitial, DN: diabetic nephropathy, H. Scl: hypertensive sclerosis, Ch. GN: chronic glomerulonephritis, PKD: polycystic kidney disease, DM: diabetes mellitus, SLE: sytemic lupus erthmatosus , FSGS: focal segemental glomerulosclerosis, MGN: membronus gloemrulonephritis



1  
2  
3  
4  
5  
6  
7  
8  
9  
10  
11  
12  
13  
14  
15  
16  
17  
18  
19  
20  
21  
22  
23  
24  
25  
26  
27  
28  
29  
30  
31  
32  
33  
34  
35  
36  
37  
38  
39  
40  
41  
42  
43  
44  
45  
46  
47  
48  
49  
50  
51  
52  
53  
54  
55  
56  
57  
58  
59  
60

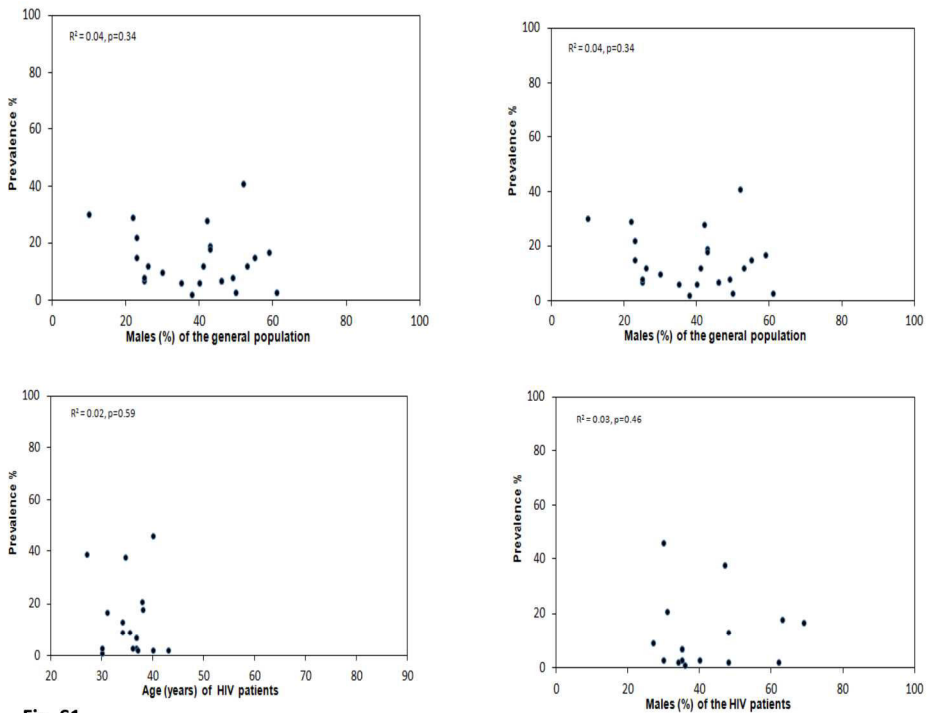

Fig. S1

254x190mm (300 x 300 DPI)

ew only



# PRISMA 2009 Checklist

| Section/topic                      | #  | Checklist item                                                                                                                                                                                                                                                                                              | Reported on page #       |
|------------------------------------|----|-------------------------------------------------------------------------------------------------------------------------------------------------------------------------------------------------------------------------------------------------------------------------------------------------------------|--------------------------|
| <b>TITLE</b>                       |    |                                                                                                                                                                                                                                                                                                             |                          |
| Title                              | 1  | Identify the report as a systematic review, meta-analysis, or both.                                                                                                                                                                                                                                         | 1                        |
| <b>ABSTRACT</b>                    |    |                                                                                                                                                                                                                                                                                                             |                          |
| Structured summary                 | 2  | Provide a structured summary including, as applicable: background; objectives; data sources; study eligibility criteria, participants, and interventions; study appraisal and synthesis methods; results; limitations; conclusions and implications of key findings; systematic review registration number. | 2                        |
| <b>INTRODUCTION</b>                |    |                                                                                                                                                                                                                                                                                                             |                          |
| Rationale                          | 3  | Describe the rationale for the review in the context of what is already known.                                                                                                                                                                                                                              | 3,4                      |
| Objectives                         | 4  | Provide an explicit statement of questions being addressed with reference to participants, interventions, comparisons, outcomes, and study design (PICOS).                                                                                                                                                  | 4                        |
| <b>METHODS</b>                     |    |                                                                                                                                                                                                                                                                                                             |                          |
| Protocol and registration          | 5  | Indicate if a review protocol exists, if and where it can be accessed (e.g., Web address), and, if available, provide registration information including registration number.                                                                                                                               | N/A                      |
| Eligibility criteria               | 6  | Specify study characteristics (e.g., PICOS, length of follow-up) and report characteristics (e.g., years considered, language, publication status) used as criteria for eligibility, giving rationale.                                                                                                      | 4,5                      |
| Information sources                | 7  | Describe all information sources (e.g., databases with dates of coverage, contact with study authors to identify additional studies) in the search and date last searched.                                                                                                                                  | 4,5                      |
| Search                             | 8  | Present full electronic search strategy for at least one database, including any limits used, such that it could be repeated.                                                                                                                                                                               | 4, supplementary table 1 |
| Study selection                    | 9  | State the process for selecting studies (i.e., screening, eligibility, included in systematic review, and, if applicable, included in the meta-analysis).                                                                                                                                                   | 4,5                      |
| Data collection process            | 10 | Describe method of data extraction from reports (e.g., piloted forms, independently, in duplicate) and any processes for obtaining and confirming data from investigators.                                                                                                                                  | 4,5                      |
| Data items                         | 11 | List and define all variables for which data were sought (e.g., PICOS, funding sources) and any assumptions and simplifications made.                                                                                                                                                                       | 4,5                      |
| Risk of bias in individual studies | 12 | Describe methods used for assessing risk of bias of individual studies (including specification of whether this was done at the study or outcome level), and how this information is to be used in any data synthesis.                                                                                      | 5,6                      |
| Summary measures                   | 13 | State the principal summary measures (e.g., risk ratio, difference in means).                                                                                                                                                                                                                               | 6                        |



# PRISMA 2009 Checklist

|                      |    |                                                                                                                                                           |   |
|----------------------|----|-----------------------------------------------------------------------------------------------------------------------------------------------------------|---|
| Synthesis of results | 14 | Describe the methods of handling data and combining results of studies, if done, including measures of consistency (e.g., $I^2$ ) for each meta-analysis. | 6 |
|----------------------|----|-----------------------------------------------------------------------------------------------------------------------------------------------------------|---|

Page 1 of 2

| Section/topic                 | #  | Checklist item                                                                                                                                                                                                                                                                    | Reported on page #                                    |
|-------------------------------|----|-----------------------------------------------------------------------------------------------------------------------------------------------------------------------------------------------------------------------------------------------------------------------------------|-------------------------------------------------------|
| Risk of bias across studies   | 15 | Specify any assessment of risk of bias that may affect the cumulative evidence (e.g., publication bias, selective reporting within studies).                                                                                                                                      | 6                                                     |
| Additional analyses           | 16 | Describe methods of additional analyses (e.g., sensitivity or subgroup analyses, meta-regression), if done, indicating which were pre-specified.                                                                                                                                  | 6                                                     |
| <b>RESULTS</b>                |    |                                                                                                                                                                                                                                                                                   |                                                       |
| Study selection               | 17 | Give numbers of studies screened, assessed for eligibility, and included in the review, with reasons for exclusions at each stage, ideally with a flow diagram.                                                                                                                   | 6,7,17,<br>Fig.1                                      |
| Study characteristics         | 18 | For each study, present characteristics for which data were extracted (e.g., study size, PICOS, follow-up period) and provide the citations.                                                                                                                                      | Tables( 2-4,<br>supplementary<br>table 2) P:19-<br>51 |
| Risk of bias within studies   | 19 | Present data on risk of bias of each study and, if available, any outcome level assessment (see item 12).                                                                                                                                                                         | Tables( 2-4,<br>supplementary<br>table 2) P:19-<br>51 |
| Results of individual studies | 20 | For all outcomes considered (benefits or harms), present, for each study: (a) simple summary data for each intervention group (b) effect estimates and confidence intervals, ideally with a forest plot.                                                                          | 6-11,<br>18-51                                        |
| Synthesis of results          | 21 | Present results of each meta-analysis done, including confidence intervals and measures of consistency.                                                                                                                                                                           | N/A                                                   |
| Risk of bias across studies   | 22 | Present results of any assessment of risk of bias across studies (see Item 15).                                                                                                                                                                                                   | Tables 2,3<br>and 4, P: 19-<br>51                     |
| Additional analysis           | 23 | Give results of additional analyses, if done (e.g., sensitivity or subgroup analyses, meta-regression [see Item 16]).                                                                                                                                                             | N/A                                                   |
| <b>DISCUSSION</b>             |    |                                                                                                                                                                                                                                                                                   |                                                       |
| Summary of evidence           | 24 | Summarize the main findings including the strength of evidence for each main outcome; consider their relevance to key groups (e.g., healthcare providers, users, and policy makers).                                                                                              | 11                                                    |
| Limitations                   | 25 | Discuss limitations at study and outcome level (e.g., risk of bias), and at review-level (e.g., incomplete retrieval of identified research, reporting bias). <a href="http://bmjopen.bmj.com/site/about/guidelines.xhtml">http://bmjopen.bmj.com/site/about/guidelines.xhtml</a> | 12,14, 15                                             |



# PRISMA 2009 Checklist

1  
2  
3  
4  
5  
6  
7  
8  
9  
10  
11  
12  
13  
14  
15  
16  
17  
18  
19  
20  
21  
22  
23  
24  
25  
26  
27  
28  
29  
30  
31  
32  
33  
34  
35  
36  
37  
38  
39  
40  
41  
42  
43  
44  
45  
46  
47  
48  
49

|                |    |                                                                                                                                            |    |
|----------------|----|--------------------------------------------------------------------------------------------------------------------------------------------|----|
| Conclusions    | 26 | Provide a general interpretation of the results in the context of other evidence, and implications for future research.                    | 16 |
| <b>FUNDING</b> |    |                                                                                                                                            |    |
| Funding        | 27 | Describe sources of funding for the systematic review and other support (e.g., supply of data); role of funders for the systematic review. | 54 |

From: Moher D, Liberati A, Tetzlaff J, Altman DG, The PRISMA Group (2009). Preferred Reporting Items for Systematic Reviews and Meta-Analyses: The PRISMA Statement. PLoS Med 6(7): e1000097. doi:10.1371/journal.pmed1000097

For more information, visit: [www.prisma-statement.org](http://www.prisma-statement.org).

Page 2 of 2
