# Supplementary material for: Prevalence and burden of chronic kidney disease among the general population and high-risk groups in Africa: a systematic review
Source: PubMed Central journal article supplement — BMJ Open. 2018 Jan 10;8(1):e015069. doi: 10.1136/bmjopen-2016-015069 (PMC5780690; doi:10.1136/bmjopen-2016-015069), 2018-01-10
Supplement: bmjopen-2016-015069supp001.pdf [file bmjopen-2016-015069supp001.pdf]

**S1 Table.** Search strategy adopted in PubMed and Ovid MEDLINE

1. exp Renal Dialysis/
2. (hemodialysis or haemodialysis).tw.
3. (hemofiltration or haemofiltration).tw.
4. (hemodiafiltration or haemodiafiltration).tw.
5. dialysis.tw.
6. (CAPD or CCPD or APD).tw.
7. Renal Insufficiency/
8. Kidney Failure/
9. exp Renal Insufficiency, Chronic/
10. Kidney Diseases/
11. Uremia/
12. (end-stage renal or end-stage kidney or endstage renal or endstage kidney).tw.
13. (ESRF or ESKF or ESRD or ESKD).tw.
14. (chronic kidney or chronic renal).tw.
15. (CKF or CKD or CRF or CRD).tw.
16. (predialysis or pre-dialysis).tw.
17. ur?emi\$.tw.
18. 1 or 2 or 3 or 4 or 5 or 6 or 7 or 8 or 9 or 10 or 11 or 12 or 13 or 14 or 15 or 16 or 17
19. afric\$.ti,ab,kw,tw,mp.
20. 18 and 19
