# Supplementary material for: Prevalence and burden of chronic kidney disease among the general population and high-risk groups in Africa: a systematic review
Source: PubMed Central journal article supplement — BMJ Open. 2018 Jan 10;8(1):e015069. doi: 10.1136/bmjopen-2016-015069 (PMC5780690; doi:10.1136/bmjopen-2016-015069), 2018-01-10
Supplement: bmjopen-2016-015069supp002.pdf [file bmjopen-2016-015069supp002.pdf]

**S2 Table: Studies among CKD patients**

| Study ID                  | Year<br>Country<br>Region   | N   | Population Characteristic                                                                                                 | biopsy | causes of CKD                                                                                                                                                   |
|---------------------------|-----------------------------|-----|---------------------------------------------------------------------------------------------------------------------------|--------|-----------------------------------------------------------------------------------------------------------------------------------------------------------------|
| El Khayat S <sup>31</sup> | 2013, Morocco,<br>North     | 134 | Age( years): 54.4±18.1<br>Male gender: 58.65%                                                                             | no     | DN: 44.02%<br>H.scl: 11.2%<br>Tub.int: 9.7%<br>SLE: 5%<br>Ch.GN: 3.7%<br>Undetermined: 26.11%                                                                   |
| Seck S <sup>32</sup>      | 2013, Senegal,<br>West      | 60  | Age (years): 70.5±54.6<br>Male gender: 52%<br>Hypertension: 20%<br>SBP (mmHg): 167 ± 78<br>DBP (mmHg): 95 ± 55<br>DM: 18% | no     | H.scl: 30%<br>DN: 25%                                                                                                                                           |
| Seck S <sup>33</sup>      | 2008, Senegal,<br>West      | 118 | Age (years): 39.28±16.4<br>Male gender: 56%<br>SBP (mmHg): 160±15<br>DBP (mmHg): 90±15                                    | yes    | Ch.GN: 35%<br>Vascular nephropathy: 20.2%<br>Tub.int: 12%<br>DN: 10.5%<br>PKD: 4.2%<br>Autoimmune: 4.2%<br>Neoplasm: 1.6%<br>H.scl: 0.8%<br>Undetermined: 11.5% |
| Bourquia A <sup>34</sup>  | 2002, Morocco,<br>North     | 420 | Age (years): 46±3<br>Male gender: 52%                                                                                     | no     | PKD: 6.5%                                                                                                                                                       |
| Ouattara B <sup>35</sup>  | 2011, Ivory Coast,<br>West  | 301 | Age (years): 44±10<br>Male gender: 56%<br>Hypertension: 33.5%<br>DM: 12.3%                                                | no     | Nephroangiosclerosis:25.2%<br>HIV nephropathy:17%<br>Interstitial nephritis: 10.3%<br>DN: 9.6%<br>Ch.GN: 6.6%<br>PKD:2.3%<br>Undetermined: 29.2%                |
| Lengani A <sup>36</sup>   | 1997, Burkina<br>Faso, West | 174 | Age (years): 36±15<br>Male gender: 63%<br>Hypertension: 64.9%                                                             | no     | Ch.GN: 42.5%<br>Vascular nephropathy: 23.6%<br>Tub.int: 16.1%<br>PKD: 1%<br>Undetermined: 16.8%                                                                 |
| Afifi A <sup>37</sup>     | 2005, Egypt, North          | 220 | Not known                                                                                                                 | no     | DN: 28.2%<br>H.scl: 25.5%<br>Obstructive uropathy: 13.5%<br>Cystitis: 6.8%<br>Simple cyst: 4.5%<br>Undetermined: 29.5%                                          |
| Diouf B <sup>38</sup>     | 2000, Senegal,<br>West      | 261 | Age (years): 44(range:15-88)<br>Male gender: 46%                                                                          | no     | Nephroangiosclerosis: 25%<br>DN: 20.5%<br>Ch.GN: 15%<br>Undetermined : 34%                                                                                      |
| Niang A <sup>39</sup>     | 2008, Senegal,<br>West      | 258 | Age (years): 28 (range:15-79)<br>Male gender: 75%<br>Hypertension: 12.2%                                                  | yes    | FSGS: 52%<br>MGN: 12%<br>Minimal change diseases: 7.7%                                                                                                          |
| Sabi K <sup>40</sup>      | 2011, Togo, West            | 398 | Age (years): mean: 42.6                                                                                                   | not    | Ch.GN: 40.2%                                                                                                                                                    |

|                            |                        |      |                                                                                                                                  |       |                                                                                                                                                                                                                                                       |
|----------------------------|------------------------|------|----------------------------------------------------------------------------------------------------------------------------------|-------|-------------------------------------------------------------------------------------------------------------------------------------------------------------------------------------------------------------------------------------------------------|
|                            |                        |      | Male gender: 57%                                                                                                                 | known | Tub.int: 20.9%<br>Nephroangiosclerosis: 17.6%                                                                                                                                                                                                         |
| Ulasi I <sup>41</sup>      | 2010, Nigeria,<br>West | 1538 | Age (years): 42.55±15.43<br>Male gender: 65%<br>Hypertension: 17.2%<br>DM: 11.8%                                                 | yes   | H.scl: 17.2%<br>Ch.GN:14.6%<br>DN:11.8%<br>Undetermined:51.6%<br>Others: 4.6%                                                                                                                                                                         |
| AbdErrahim E <sup>42</sup> | 2001, Tunis,<br>North  | 1471 | Age (years): 38.3±14.6<br>Male gender: 69%                                                                                       | no    | DN: 20.3%                                                                                                                                                                                                                                             |
| Abdou N <sup>43</sup>      | 2003, Senegal,<br>West | 115  | Age (years): 28 (IQR:5-60)<br>Male gender: 56%                                                                                   | yes   | FSGS: 46.9%<br>MGN:8.7%<br>Minimal change disease:6.1%<br>Endocapillary GN: 2.6%<br>Mesangioproliferative: 1.7%<br>Extracapillary GN:1.7%<br>IgA nephropathy:1.7%<br>SLE: 13%<br>H.scl: 2%<br>Undetermined: 7%<br>Others:11%                          |
| Afifi A <sup>44</sup>      | 2004, Egypt, North     | 3172 | Age (years): 56.5±29.2                                                                                                           | yes   | DN: 14.5%                                                                                                                                                                                                                                             |
| Afifi A <sup>45</sup>      | 1999, Egypt, North     | 4905 | Age (years): 45.6±14.2<br>Male gender: 62.4%                                                                                     | yes   | H.scl: 28%<br>Ch.GN: 16.2%<br>Obstructive uropathy: 15%<br>DN: 8.9%<br>PKD: 3%<br>Undetermined: 16.2%                                                                                                                                                 |
| Agaba E <sup>46</sup>      | 2009, Nigeria,<br>West | 130  | Age (years): 41±16<br>Male gender: 68%                                                                                           | no    | Ch.GN: 39%<br>H.scl: 34.6%<br>DN: 11.8%<br>PKD: 6.9%<br>Undetermined: 7.7%                                                                                                                                                                            |
| Alashek W <sup>47</sup>    | 2012, Libya, North     | 2417 | Age (years): 49 (range: 36-61)<br>Male gender: 58%                                                                               | no    | DN: 26.5%<br>Ch.GN: 21.2%<br>H.scl: 14.6%<br>Congenital and hereditary: 12.3%<br>PKD: 6.3%<br>Obstructive uropathy: 5%<br>Chronic pyelonephritis: 2%<br>Interstitial nephritis: 1.2%<br>Autoimmune disease: 0.7%<br>Other: 2.9%<br>undetermined: 7.3% |
| Alasia D <sup>48</sup>     | 2012, Nigeria,<br>West | 320  | Age (years): 46.2±17.6<br>Male gender: 63%<br>SBP (mmHg): 171.2±31.9<br>DBP(mmHg): 102.5±27.4                                    | yes   | Ch.GN: 45.7%<br>H.scl: 29.8%<br>DN: 17.5%<br>PKD: 3%<br>Obstructive uropathy: 2%<br>Undetermined: 2%                                                                                                                                                  |
| Alebiosu C <sup>49</sup>   | 2006, Nigeria,<br>West | 153  | Age (years): 39.6±14.8<br>Male gender: 59%<br>Hypertension: 38.5%<br>SBP (mmHg): 167.3±15.5<br>DBP (mmHg): 106±28.9<br>DM: 13.1% | no    | Ch.GN: 41.2%<br>H.scl: 26.1%<br>DN: 13.1%                                                                                                                                                                                                             |

|                            |                           |      |                                                                                                                                                          |     |                                                                                                                                                                                                                                                                                                                                                                                                                     |
|----------------------------|---------------------------|------|----------------------------------------------------------------------------------------------------------------------------------------------------------|-----|---------------------------------------------------------------------------------------------------------------------------------------------------------------------------------------------------------------------------------------------------------------------------------------------------------------------------------------------------------------------------------------------------------------------|
| Amira C <sup>50</sup>      | 2012, Nigeria, West       | 201  | Age (years): 47.5±15.7<br>Male gender: 56.2<br>Hypertension: 42.8%<br>DM: 13.4%                                                                          | no  | H.scl: 42.8%<br>Ch.GN: 15.9%<br>Obstructive uropathy: 14.9%<br>DN: 13.4%<br>PKD: 1%<br>SLE: 1%<br>Sickle cell nephropathy: 1%<br>Analgesic nephropathy:0.5%<br>Undetermined : 9.5%                                                                                                                                                                                                                                  |
| Arogundade F <sup>51</sup> | 2011, Nigeria, West       | 760  | Age(years): 36 (range:15-90)<br>Male gender: 70.3%<br>Hypertension: 72.4%<br>SBP (mmHg): 160 (range:120 – 270)<br>DBP (mmHg): 100 (range:50 – 209 )      | no  | Ch. GN: 43.7%<br>H.scl: 31.1%<br>Obstructive uropathy: 6.7%<br>DN: 3.7%<br>Tub.int: 2.2%<br>PKD: 0.7%<br>Undetermined : 12%                                                                                                                                                                                                                                                                                         |
| Counil É <sup>52</sup>     | 2008, Tunis, North        | 6397 | Age (years): 51.4±18.0<br>Male gender: 56.5%                                                                                                             | no  | DN: 35%<br>H.scl: 25.3%<br>Tub.int: 19.7%<br>Ch.GN: 13%<br>PKD: 2.2%<br>Undetermined:52.8%                                                                                                                                                                                                                                                                                                                          |
| Chijioke A <sup>53</sup>   | 2012 , Nigeria ,West      | 116  | Age (years): Male:<br>50.89±13.43 and Female:<br>48.22±14.70<br>Male gender: 61.2%<br>SBP(mmHg): 153.41±27.12<br>DBP (mmHg): 93.92±17.19                 | no  | H.scl:52.58%<br>Ch.GN: 17.2%<br>Tub.int: 17.1%<br>PKD: 4.3%<br>DN: 2.6%<br>Chronic pyelonephritis: 2.6%<br>Obstructive uropathy:1.7%<br>Undetermined: 1.9%                                                                                                                                                                                                                                                          |
| Madala N <sup>54</sup>     | 2014, South Africa, South | 302  | Age (years): 47.1±17.0<br>Male gender: 45%<br>SBP (mmHg): (male) 144.6 ± 28.3. (female)141.1 ± 25.5<br>DBP(mmHg): (male)84.2 ± 18.1. (female)81.0 ± 19.0 | yes | H.scl: 75.2%<br>DN: 29.8%<br>HIV nephropathy: 28.6%<br>Ch.GN: 7%<br>Tub.int:6%<br>Undetermined: 6%                                                                                                                                                                                                                                                                                                                  |
| Okpechi I <sup>55</sup>    | 2013, South Africa, South | 111  | Age (years): 66.3 ± 5.7<br>Male gender: 47.7%<br>Hypertension: 71%<br>DM: 19.8%                                                                          | yes | MGN: 14.4%<br>Mesangioproliferative GN:8.1%<br>Crescentic GN: 7.2%<br>Mesangiocapillary GN: 3.6%<br>Post infectious GN: 2.7%<br>FSGS:1.8%<br>IgAN nephropathy: 0.9%<br>DN:12.6%<br>Ch.GN: 5.4%<br>SLE: 4.5%<br>H.scl: 3.6%<br>Amyloidosis: 2.7%<br>Myeloma: 2.7%<br>Crescentic GN: 1.8%<br>HIV nephropathy:0.9%<br>Thrombocytopenic purpura:0.9%<br>Hemolytic uremic: 0.9%<br>Tub.int: 17.2%<br>Miscellaneous: 8.1% |

|                             |                           |      |                                                                                                                                                                         |     |                                                                                                                                                                                                                                                                                                                                                  |
|-----------------------------|---------------------------|------|-------------------------------------------------------------------------------------------------------------------------------------------------------------------------|-----|--------------------------------------------------------------------------------------------------------------------------------------------------------------------------------------------------------------------------------------------------------------------------------------------------------------------------------------------------|
| Laleye A <sup>56</sup>      | 2012, Benin, West         | 3783 | Age (years): 47.2 (range:29 - 70 )<br>Male gender: 24%<br>Hypertension: 59%                                                                                             | no  | PKD: 1.8%                                                                                                                                                                                                                                                                                                                                        |
| Okunola Y <sup>57</sup>     | 2013, Nigeria, West       | 300  | Age (years): 49 ±16.25<br>Male gender: 68%                                                                                                                              | no  | H.Scl: 38.8%<br>Ch.GN: 28.8%<br>DN:22.5%<br>PKD:2.7%<br>SLE: 1.1%<br>Undetermined: 6.1%                                                                                                                                                                                                                                                          |
| Bello B <sup>58</sup>       | 2013, Nigeria, West       | 120  | Age (years): 47 + 14<br>Male gender: 60%<br>SBP(mmHg): 162 ± 32<br>DBP(mmHg): 94.9 ± 19.6                                                                               | yes | H.scl: 45%<br>Ch.GN: 15.8%<br>DN: 12.5%<br>Obstructive uropathy : 12.5%<br>PKD: 3.3%<br>Ch. Pyelonephritis: 2.5%<br>SLE: 1.7%<br>Analgesic nephropathy: 1.7%<br>Sickle cell nephropathy: 1.7%<br>Toxic nephropathy: 0.8%<br>Undetermined: 2.5%                                                                                                   |
| El-Minshawy O <sup>59</sup> | 2011, Egypt, North        | 800  | Age(years): 46 ± 13<br>Male gender: 65%                                                                                                                                 | no  | H.scl: 20%<br>Obstructive uropathy: 15%<br>Ch.GN: 11%<br>SLE: 9%<br>DN: 8%<br>Analgesic nephropathy: 5%<br>Chronic pyelonephritis: 5%<br>Undetermined: 27%                                                                                                                                                                                       |
| Okpechi I <sup>60</sup>     | 2010, South Africa, South | 294  | Age (years): 33.9 ± 12.0<br>Male gender: 45.2%<br>Hypertension:39.8%                                                                                                    | yes | Crescentic GN: 5%<br>Ch GN: 15.7%<br>FSGS: 15.7%<br>IgA nephropathy: 1.7%<br>Minimal change disease: 6.6%<br>Mesangiocapillary GN: 19%<br>MGN: 14.9%<br>Mesangial proliferative GN: 12.4%<br>Postinfectious GN : 9%<br>HIV nephropathy: 42.8%<br>SLE: 13.3%<br>DN: 9.2%<br>MGN: 6.9%<br>Ch.GN: 5.85%<br>Mesnagiocapillary: 4.6%<br>Others: 17.4% |
| Madala N <sup>61</sup>      | 2012, South Africa, South | 148  | Age(years): 41.4 ± 13.1<br>Male gender: 37.2%<br>SBP (mmHg): African (133.6 ± 20.2). Indian (130.1 ± 20.6)<br>DBP (mmHg): African:(133.6 ± 20.2). Indian (130.1 ± 20.6) | no  | Ch.GN: 39.2%<br>H.scl: 34.4%<br>DN: 7.4%<br>PKD:6.8%<br>Undetermined: 3.4%                                                                                                                                                                                                                                                                       |
| El Farouki M <sup>62</sup>  | 2013, Morocco, North      | 207  | Age (years): 52.43 ± 15.48<br>Male gender: 64.3%<br>Hypertension: 73.9%<br>DM:41.5%                                                                                     | no  | DN: 41.5%<br>Ch.GN: 16%<br>Tub.int: 14%<br>H.scl: 12%                                                                                                                                                                                                                                                                                            |

|                          |                           |      |                                                                                          |     |                                                                                                                                                                                                                                                                                                                                                 |
|--------------------------|---------------------------|------|------------------------------------------------------------------------------------------|-----|-------------------------------------------------------------------------------------------------------------------------------------------------------------------------------------------------------------------------------------------------------------------------------------------------------------------------------------------------|
|                          |                           |      |                                                                                          |     | PKD: 1%<br>Undetermined: 15.5%                                                                                                                                                                                                                                                                                                                  |
| Okpechi I <sup>63</sup>  | 2011, South Africa, South | 1284 | Age (years): 36.8 ±14.0<br>Male gender: 45.2%                                            | yes | Mesangiocapillary: 20.4%<br>Mesangioproliferative: 19.2%<br>MGN: 18.5%<br>Crescentic GN: 11.4%<br>FSGS: 10.5%<br>Post infectious: 8.2%<br>Minimal change: 6%<br>IgA nephropathy: 5.8%<br>SLE: 19%<br>Infection related: 15%<br>Vascular causes: 9%<br>Hereditary: 6%<br>Undetermined: 3.5%                                                      |
| Niang A <sup>64</sup>    | 2014, Senegal, West       | 62   | Age (years): 47 ± 13<br>Male gender: 55%                                                 | no  | Nephrosclerosis: 40.3%<br>Ch.GN: 21%<br>DN: 19.4%<br>PKD: 3.2%<br>Tub.int: 1.6%<br>Undetermined: 14.5%                                                                                                                                                                                                                                          |
| Buargub M <sup>65</sup>  | 2008, Libya, North        | 124  | Age (years): 47.4±15<br>Male gender: 62%                                                 | no  | DN: 27.4%<br>H.scl: 10.5%<br>Ch.GN: 8%<br>Nephrolithiasis: 7.3%<br>Amyloidosis: 6.8%<br>Chronic interstitial nephritis: 6.4%<br>PKD: 4%<br>Ischemic : 3.2%<br>SLE: 0.8%<br>Familial: 0.8%<br>Undetermined: 30.6%                                                                                                                                |
| Chijioke A <sup>66</sup> | 2010, Nigeria, West       | 436  | Age (years): 47.4 ± 16.2<br>Male gender: 57%                                             | no  | PKD: 15.4%                                                                                                                                                                                                                                                                                                                                      |
| Elsharif M <sup>67</sup> | 2011, Sudan, East         | 224  | Age (years): 45.78± 17.16<br>Male gender: 67.8%                                          | yes | H.sclerosis: 14.29%<br>Obstructive uropathy: 11.61%<br>Ch.GN: 9.8%<br>DN: 8.04%<br>Anaglesic nephropathy: 1.34%<br>Renovascular: 0.45%<br>PKD: 0.9%<br>Undetermined: 53.57%                                                                                                                                                                     |
| Elkhatib M <sup>68</sup> | 2012, Egypt, North        | 437  | Age (years): 89% <50 years.<br>8.5% 50–60 years and 3% ><br>50 years<br>Male gender: 52% | yes | SLE: 24.7%<br>MGN: 10.9%<br>FSGS: 6.8%<br>Mesangiocapillary GN: 6.7%<br>Acute interstitial nephritis: 6.25%<br>Membranous nephropathy: 5.4%<br>Crescentic GN: 5.4%<br>Chronic interstitial nephritis: 4.5%<br>Minimal change disease: 3.8%<br>focal proliferative GN: 3.6%<br>Amyloidosis: 2.7%<br>Nephrosclerosis: 1.13%<br>Undetermined: 3.6% |

|                             |                        |     |                                                                                  |     |                                                                                                                                                                                                      |
|-----------------------------|------------------------|-----|----------------------------------------------------------------------------------|-----|------------------------------------------------------------------------------------------------------------------------------------------------------------------------------------------------------|
| Ibrahim S <sup>69</sup>     | 2012, Egypt, North     | 924 | Age (years): 26.5 ± 14.6 years<br>Male gender: 47%                               | yes | FSGS: 28.57%<br>mesangioproliferative GN: 20.02%<br>MGN : 14%<br>Minimal change disease: 8.55%<br>Amyloidosis: 5.52%<br>Diffuse proliferative GN: 5.20%<br>Focal proliferative GN: 3.68%<br>DN:0.22% |
| Ayach G <sup>70</sup>       | 2011, Morocco, North   | 386 | Age (years): 19 (IQR:12-25)<br>Male gender: 61%                                  | yes | MGN :79.20%<br>FSGS: 9.10%<br>Extramembranous glomerulonephritis:9.10%<br>Renal amyloidosis: 2.6%.                                                                                                   |
| Ramilitiana B <sup>71</sup> | 2016, Madagascar, East | 239 | Age (years): 45.5( range: 16-82)<br>Male gender: 40%<br>Diabetes mellitus: 12.6% | No  | Ch.GN: 40.1%<br>H.Scl: 35.6%<br>DN:12.6%<br>Tub.int: 10.46%                                                                                                                                          |
| Zajjari Y <sup>72</sup>     | 2012, Morocco, North   | 16  | Age (years): 60 (47-79)<br>Male gender: 81.3%<br>Hypertension: 56.3%             | Yes | DN: 25%                                                                                                                                                                                              |

Tub. Int: tubulo-interstitial, DN: diabetic nephropathy, H. Scl: hypertensive sclerosis, Ch. GN: chronic glomerulonephritis, PKD: polycystic kidney disease, DM: diabetes mellitus, SLE: sytemic lupus erthmatosus , FSGS: focal segemental glomerulosclerosis, MGN: membaronus gloemrulonephritis
